# Supplementary material for: Insights into the Development and Evolution of Exaggerated Traits Using De Novo Transcriptomes of Two Species of Horned Scarab Beetles
Source: PLoS One. 2014 Feb 20;9(2):e88364. doi: 10.1371/journal.pone.0088364 (PMC3930525; doi:10.1371/journal.pone.0088364)
Supplement: Materials and Methods S1 — Adjusted morph-biased expression values for O. taurus . (XLS) [file pone.0088364.s003.xls]

## Sheet: amended_values
Sequence Name	Sequence	Further Assembly?	454 sequence	Sanger sequence 1	Sanger sequence 2	Sanger sequence 3	Avg A ALL	tnfd morph specific	tnfd sex sp	total tissue/array types	Sequence length	Horn Bias?
contig_10	ATTGTAGTCTACATCCAAACAAGACAATGTGGAAGATATTCGCTCTTTTACTTCTCTGCGTCTGCGGCGCGTATGCCCGCGTTTCTGCCGGAGACATCAACTATTTCTTGTGGAATAGACGTGCTACTAGGGAAGAATTGAGGATTGGTCAATATGGGAATAACATCGACAGAAGCGCACCTGTTAAAATTCTTGTTCATGGTTGGACCGAAAGTATTAACTCTTTCTGGTATACTGGAGCTAGAACCGCGTATGTAGGAAGTGGTGCTAATGTCATTGCTATCGATTGGTCCAGACACGCCCAATTAACTTACCCCACTGCAGTTAATCGTCTTCCTGATATTGGACAATTTACCGCTCAGTTTATTAATGGATTGGTGAACACCCAAGGAATTTCGA…	no					8.09249	-1.84386	-1.39742	4	664	Non-Horn
contig_101	AAAAAGAGGTTGTTGCTGACTTTTTGGAGGACACTGTATATCACTCTATAGGTGAAGGTGGATCACCCGAAAGATGAATTTTTGACACGTGTTCCCGGTACATAACCTCAACGATGGCGACGTCGATTCCAATCGCTGTTCGCAGCTCTAATGGGATAAATGTGAATTTGGGACCACCCAATTTTGGAACCGTCGTCGATTTCTCACCTGTTGTGAGTAAATCTTGTCGTACCCTACTGTTTAGTCCCAATGGAA	no					11.5112	-1.07492	-1.6803	4	255	Non-Horn
contig_102	GCATTTTTAACTCTCTTTCGCAGGTTAAGTTCCTGCCGTCATCATGAAACTCAACATATCGTTCCCCGCGACCGGGGCTCAAAAACTGATCGAGGTTGTTGACGAACACAAGATTCGTATTTTTTACGAAAAACGTATGGGGGCGGAAGTTGAAGCTGATCAACTTGGAGATGAGTGGAAAGGTTATGTTTTGAGAATTGCTGGAGGCAACGATAAACAAGGTTTCCCTATGAAACAAGGTGTCCTCACTAACGCTCGAGTCCGCCTCTTACTTTCAAAAGGTCATTCTTGTTACCGTCCACGTCGTACTGGTGAGCGTAAACGTAAATCTGTGCGAGGATGCATTGTTGATGGTAACTTGAGTGTTTTGGCGTTGGTTGTTGCCCGCAAAGGTGAATC…	no					11.6005	-1.36272	-2.04991	4	610	Non-Horn
contig_103	GATCCACCGGCGTACTTTGTATTATATATTATACGAGCAGTGTGGCGATAGCAAAGACAGCCAGTAACAGCGATAACCGGAAAGATATTCTAGCATGTTTGCACTTAGACGACCGGCATTTGTAAGACATTTTTCTGCACTAGTTAAAAACATGGAAAAGTTGGAAGTTGTCCCCGATGTTATCGATCAAGTTCCCAAGGAAGTCTGCAAGGTTAGCTATCCAAGTGGTGTCAAGGTTGATCTTGGGAACGTTTTGACGCCGACTCAAGTTAAAGACATTCCAAACGTGGAATGGACAGCCGATGATAGCGCTTTATACACCGTTTGCATGACGGATCCGGATGCTCCAAGTCGCAAAGAACCGAAATTTCGCGAATGGCATCATTGGTTAGTGGGAAA…	no					10.3526	-1.84123	-1.45503	4	758	Non-Horn
contig_105	AAACATAACGTCTAAAAGGCGTGGCTGTCATCAATTTTATCACAACCCAAACAAAAACATGTTTAATCTGGTTTTATCGACGATTTTAATCTTATCTTCACCAGTATGGTCACAAAGATCTCCTACGATATCATATATATCCCAAGAAGTAATCGTGGATATAGGGGGTACGGCTCAAATGCAATGTTCAGTACAATATGTGCATGAATACCCGGTGGTTTGAATGAAATTAGACCAAAATGGAGGGGGTCAAGGAGTTCCAATTTCAACAGGGGCGACCCTAATCGTTCATGATTCACGATTTTCTCTCAGGCATGATCAAGGAAGCTCAACCTATACATTACAAATTAAAGATATCCAAGAAACTGATGCTGCTGTTTACCAGTGCCAAGTTATTAT…	no					9.89448	-1.35835	-2.18588	2	851	Non-Horn
contig_11	GGTTGTTATGTGGTGGTGCGATCCGTTTTTTAAAATAACCGCTAAATTTCCAACTACATCTGTACATCCACTGACTAGTAAAGTAGTAGAAGTCGGCCACAATGCCATCCTTTCCTGTACCGTCACCGGGAACACTCCGCTCAGGATAACTTGGCTCAGAAATATGCTTCCTATAGACACTAGAAACAATCCTAGATATTACATTAGAGAAGATTCACCAGGTTCGCTACAAATTAAAAGCAGTGACGAAAAAGATCAAGGAAAATATGAATGTGTGGCTGAAAATTCTATTGGAACAGAATACTCTAAATCATCCCAGCTTTACGTTAAAGTGCGTCGAGTTCCACCACAATTTTCAAAACCACCTCCAAGTTTAACAAAAGTGATGTTAGGGGCTGA…	no					10.6114	-0.984431	-1.23251	4	986	Non-Horn
contig_113	TCATAATACTTTTCAGTAATGAAGAAGTTCTTGGTGTTCATTTTAATCGGAGCTGTTTCAGCTAGAATTAGCGACGAAAAATGTGAAGAATATAGTGAGCGGTATAAGCACATCAAAAATTGGGGGGAATTTTCTCACATTGGTGCGTTAGGTTCCTACGCCGGTGGTGACATTGATTATAATTGTCCGGTAGTTTTAATAAGTGAATCTTTCGCACTAGCTGGAGCTTTCTGTTTTAATAATCGAAGACATGTT	no					10.0896	-1.24056	-0.931129	3	255	Non-Horn
contig_115	GACAGTTGGTCGCCGAAAGGTCCTAGGAAACCACACTTCGGTCATACCGTAACTGAATCTTTTAATAACCGTTATTTATCCAAGAAAAATTCAACAAAATGCGTGAATGTATCTCAGTTCATGTTGGCCAAGCTGGCGTCCAAATTGGTAACGCTTGCTGGGAGTTGTACTGCCTTGAACATGGTATTCAACCCGAAGGGCAAATGCCCAGTGACAAAACCGTTGGGGGAGGCGACGACAGTTTCAACACTTTCTTCAGCGAAACTGGTGCTGGGAAACACGTTCCTCGCGCAGTTTTCGTTGATTTGGAACCCACTGTTGTTGATGAAGTAAGAACTGGAACATACAGACAATTGTTCCACCCAGAACAACTTATCACCGGAAAGGAAGATGCTGCCA…	no					11.6863	-2.32087	-2.41652	1	695	Non-Horn
contig_118	GAGTGTCAACTGGAACGTTAACAACAAAGCCTCGCGTGCAAATCAATTTACTCAATTCAATAAAAAAAATTGTTTCACAAAAAATAATTGTGCCACCATGGAGATATGGAAGATTTTGTATTTACTTTTTGGAACGTTTACACTTTTAACAGAACGAATCGTTGCCCAAATTAAACCACAACAAAACCCAACTTTTCTTCGTTTAGGTTCTTTCGGAAATCAACCACCACCACGTCATGATACACCAGCCTCATCTTGTGACTGTTCATGCGGAATAGTTAATGATGATCAAAGAATCGTCGGAGGACACACCGTAAAAGAAAATGCTTACCCATGGATGGCTAGATTATCATATTTTAATCGTTTTTATTGCGGAGGAATGCTTATAAACGATCGTTA…	no					11.6083	-1.35173	-2.23586	4	737	Non-Horn
contig_119	GAGTCGCCGCAATCGACTCGTTAAGAGAACACTTAGAGGACCGACCGACACGCATAGAGAACCGCCAAGATGTTCAAAAATCACCTGGAGATGATAGGCCGGAATGAAACGGCTTCGAAGAAAGCCAAATTTTGGCAATCTTTTGTAAGATCCCTCAAGGGATCTGATGATATTAGGGCAACCGACCCGATTTATAGACCTCCCGGAAACCTTCAGACCGATCAATGAATTCGCCGAGTTCTCCTCGACATGGCCGAAATCGATCTACGACGATCCCATTCACGCGGGAGAACGCATCCACGTTCCGGGATATCGTTATGATCCACTTCATCGCGATACTTACGGCTACTCACCCAGACCGATTTTCCCACACAACTACTCGACCTTAGACAGGTACCG…	no					12.0015	-1.09042	-1.2704	4	1013	Non-Horn
contig_120	GCTGTCAATGTCAATCTATCAAAACCAAACAAATGTGTTTTTAAATTATCTTTAAACGATTCTAAAAGTATTTCTTAAAAAATGGTAAAACTAACTGCGGAATTAATACAAAACTCATGGCAGTATATAAATCCGGTAAAAGATCGTGAATTAAATTTACGAGGATATAAAATCCCGGAAATTGAGAATTTAGGGGCTACTGGTGATCAATTCGACACGATCGACTTCTCCGAAAACGATATCCGCAAATTGGATGGATTTCCATATTTAAAACGATTAAAATGTCTATTAATGAACAATAATCGTATTGTTCGTATTGGGGAAGGTTTAGAAGAACACATCCCTAATTTAGAGTCGCTTGTTCTTACTGGCAATCACATTGAAGAATTAGGCGATGTT…	no					9.88157	-1.98282	-2.79651	4	666	Non-Horn
contig_121	TTTAGTTCTGTCAAAGTGACAAGATGGCACGTCAGCAGCAAGACGTAGATGAATTATTCGAAATTAAAAACTTCTTTTACATCGGAAATTACCAACAATGCATAAAAGAAGCCCAAGAATTACGAAAGACTTCAACTCCAGAAGTGGCCGTAGAAAAATTAATCTTCATGTACCGCTCTTTTATCGCCCAAAATAAATTTTTGGTCGTCTTAGATGAAATCAAACCATCTTCCAACCCAAAATTACAATCGATTAAATTATTAGCTGAATACATGTCGAACAAATTAAAAAGAGACACGATTGTAACCCAATTAGATGAAAAATTGAGTGCTAATGCGAATATAGAAGATGAAATGTTGATTTTGGTAGCAGCGACGATTTATCAGCGAGAAAATAATT…	no					10.3342	-2.52974	-2.74832	2	677	Non-Horn
contig_127	GGCCGGGGATTTATTGATTGTTTTTGCTCAAATTATCACTTCTATACAAATGGTTATTGAAGAAAAGTTTGTTCATGGCTTGGATATTCCTCCGCTTCAAGCTGTTGGATGGGAAGGAGTATTTGGTTTTTTGGTTTTGGGACTTCTCCAAATCCCGTTCTATTTCATCTACGTTGGACATCCTTTCAGTAACAACTCTCGGGGTGTTCTTGAAGATGTAATTGATGCTTTTGTGCAAATTAATAACAACCCACTTTTACTTTTAGCAATTCTAGGAACAATTTTGTCAATTGCCTTCTTTAACTTTGCTGGAATCAGTGTCACGAAAGAAATGTCAGCAACGCATCGAATGGTCCTCGATAGTGTTCGAACCATCGTTATATGGATGATTAGTTTATT…	no					10.0003	-2.72177	-2.67268	3	696	Non-Horn
contig_129	ACAAACCAAACCTGTCAGATGTCAAACGTCAAAGTAAAATTAACCAAATTTTAACCGATTTCGAAGAAAGATTTAATTACAAAATGTATAATCCATTATATAACCCTTTTTTACATTTCAAGTTAAGTTCACTCAGATTATAATCAATTAAAAGCGATTAAAACAAGATGGTTCGTTTATATTGGTTTTCGCGTACATCGCGGATCGTCGCGTTATGTTCCGCCGCCAATTTCATAAACAGCGCCGATCGTGTGATAATGCCCATAGCGATCATCCCAATGACCGATGAATTTCACTGGACGTTACACGAACAAGGCTGGATATTATCCGCGTTCGCTTTCGGTTATTTCACCTCACAATTATTGGGGAGTTGTTCCGCGTCGAAATTGGGTGCAAAAA…	no					10.1495	-2.27819	-1.80388	4	770	Non-Horn
contig_130	GAAGTGTGGTTGGCATGTAAAACCTGTCACAACTGGGACTTTGGGAGACCCGCATTCTTCGTTTTGTTTTTGTGCGTGCGGTGCCGTGGAAATGGTACGACCGAAAGTGTACGGACCCGCAACGAACAAAGACGGTACTTCGGTCGGTTTTAAGGGAACGGGGCTCCGTTGTTTATAAAGGCTACCGAGTGTTTAAATATGGAAGATAATGCCGAGGCGAGCCCTAACCCCATTTCTCAGGGGTGTGGCAGCCGATCGCAAATCTCTATCCAGATTAGCCCTACGACGGGCGGCGACTTCGCCGTCTTGGTCGAACCCAGCATCACCGTGGAAAACCTCAAGAAACTTGTGTCTAAGAAACTCAAATTGTCCAGGGACAGGATATGCCTATTGTTTCGC…	no					11.6346	-1.56916	-2.31312	3	675	Non-Horn
contig_134	TCTTTCCATTTTATTTTAAATGAAGTAAAATACTTTTATCTTCTTGTACTTTTATTAAAATGGATGTAATGTTATAAATTCTACCGGTTTCGGTCCTTTTATAAAACCATCTTCAGGAACCTTCGAATCTCGTCAATTTAATTTTAAAGCTCTCGTGACAATTTGCATCTTGAAATTTCTATAAAGCGTTTTATTGAAATGTGTCTATGTTATTATTAATGGTAGAATTGCGTATCAAGTCCAAACTAACGAACAAGATGGAATTATGTGTGCACGTGTTTGACAAACACGTCAGATGCTATAGTCTACTTTGATTTGTAAATTACAGTTAGAACATAAAGGAGCTATAAATTTTCCTGTAAAATGGTCGTGATGTTTGACTTTGGGATTTGTGCTTGT…	no					8.16434	-3.21164	-2.19887	0	987	Non-Horn
contig_139	TTGGCAATTCTGTTCGAAGATAACTTGTCAATGAGTGCGTCTTCGTAATATGGCTACGAATAATTATTTTGGCTTTGCACATGGTGGAACTCAATATAGTGCTGCGGCCGCCACTGGGGCCGCTTATCAAGCAGGTCAAGCTGGATATGCTGTAGCTACACCCGCCACTGCTGCTGCAGCTGCTACTTACGGTACTCAACGACCTGCAGCGACATATTCAGGATACGACGCCGCTTTATATTCCGCAGCCACTATGTACGTGGCTCAACAATCAAGTGGAGCGAATCAACAGAAAGCTGCAGGTTGGCAGGGTTATAAAAAAGGTGGTGGGGGCGCAAAGAATATGCGTACGAAAGCGCCACCGAAACCGCAACAATTACACTATTGTGATGTGTGTAA…	no					9.52348	-2.2661	-2.02436	4	1100	Non-Horn
contig_14	GGAAAAGCCAACAACACCGCAAGAGACCTACAAAAACGCGTCGATCAATTGGAAAGAGTCAACTTGGACTTGAAATCGCGTCTCGATGAAACCCTCCAAATGTTCGAGCAAAGTCAACGCGACCTTCGCATCAAAATCACCGAGATCCAACGTATCACGCACGAATTGGACAAAACTCGCGAACAAAAAGATGCTCTTGCACGCGAAAATAAAAAACTGACAGATGATTTCAACGAAGCTCGCAACACCATCACCGAGCTTACAAGACGCCTCCACGAACTTGAAATTGAGTTGCGCCGTCTTGAGAATGAACGCGAAGAGCTTACCGCTGCTTATAAAGAAGCTGAAGCTGGACGCAAAGCTGAAGAGCAACGCTCTCAAAGAATGGCTTCTGAATTT…	no					11.8497	-0.262351	-1.70602	4	929	Non-Horn
contig_142	GGTTCTCAATTGTGACGTTTTAGCACAAAGTGTTCCTAATTTTCACGTCAACAAAAAATTGCTTTAAGATAAGGTTATGTTATTGAAATGTTATTAAATATCGTTTGAATGATGATAAACAACCGTTTAAGCCCTATTCTAAGTGCTGATAGGCGATAAGAGGCGCACTATCTTAGTATAGTTGATGGAAATCGCTCACTATGAGTAAAAACATACCCGGACCTATTATTTGCCTTATATTCTTCACAACATTTC	no					9.8993	-2.04974	-2.15157	4	255	Non-Horn
contig_145	CGGCCTGGGATATAAGAACGGGTTTATTCGGGTTTAATTTACTTGGTTTGTTGATGTTTAGAGTTGAAGAAAGAAATATGTATCTCTTCGTGTTTTTAACACTTTTAGGTTGCTCTTTGGCAGCCCCTTCTGAAACGAAATCGCCATGTTTGGAGAAATTCGAATACACCCCATCAGGATTACCTGGAAAAGTAACTGGCACTTTAAATCTCCTCACTGATTACAAATTATACGGAGCTTGGGTTCGATTAATCTTCGATTCCCCCGTTAAGACAATTAAAGTCGAGGGAGATGTTTTACAACAAGCTATTTACGATAAAGATTCTCCATCGAACGAAGTTTTATTGAAAAACCGTGATTTTATCATTAATAAAAATGTTCCGGTTAAAATACCCATCG…	no					11.5838	-0.676554	-1.06627	4	590	Non-Horn
contig_152	GGACAGTCGTTGACAGTAAGAATTGTAAACCGACCTGAAAAATATGGCTCCATTAAATTATTGTTGCAGTTGAATATCCACCGAAACAAAGAATAGGAGAGGATTAATACGTTATAGTTGTTATTATTGTATGGGATAAATAATAAATGGGCTTAGCTACGATCTTATGGAATATGCTGGATGAAACCGGCGGTCGACGGCGCCGCAATGAGACGGAAGCGGACGCCGAAGCACCACAAGAAGAAACCGTCTTCGGCGAAGAACCGGATTTGCATCAAGAAATCCCAGGGACGACGCCCCGGTTTGCAGCCACGCAAATTTTGAATTCGGAACCGAAAACCGAAGTGCGCATGATCGAGTACAACAGGAGATGCGGACGCGGAAAAGGCAAAGATGATA…	no					12.7076	-2.4454	-2.96159	3	1071	Non-Horn
contig_157	GGATACATTCCAAAATGAAGCTGATTTTGGTGTTTCTTGCTCTTGCCTCAGTGGCACTCGCCGACGATGTCGACTGGTCAAAAGTTTTTATTAGAGAACCAAGAATTCCACTTCCCTTCGATCTTGACGAAGTTATTTTCGAACCAAAGATTGTAGGAGGAATTGAAGCAACTCCCCACTCCATTCCATTCCAAGTTGGTCTGCTTATCACCGTTGCTGCCGGAACTGGTTTCTGTGGCGGATCTTTAATCACCCCTCGTGAAGTCTTAACTGCTGCTCATTGTGTTGATGGTGGTTCTCAAATTGAAGTACGTTTAGGAGCTCACAGAATCCAAGAAACAGCCGGTTTAACCATCATGCGTACCACCAACTGGAGAATGCATCCAGGTTGGGATGCAT…	no					7.86645	-1.61205	-0.880008	4	720	Non-Horn
contig_158	CATTTTAGTGCTACACGACTCCATTGCGGCGTATTTTGCGAAGTGCTCAAAAGCGAAGCGGACGCCGAATCTCTCGAAAAAAAAGAAGCCTCCGTTCTTTCCTTCTTAATCCGTATTTAAAATACACAATGAGTGACAGAGAGGCTACTAGGTCTCCTGGACATAAACCCATCAACGATCGCGATCATTCTCCCCACGGAAGAAGAGAAGAGTCTCCTAGGAATCATAAAACTAAAAGCTATTCTAGAAGTCCGAGCCGCGGTAGAAAAATGTCCTACAGAGATGATCGCGACCGTGAGCGTCGTAGGGATGGAGGAGGAGACCGCGACGGTGGTCGTCGTTACAGGTCCCGCAGTCGATCACGCTCAGACAGACGTTACAAGTCCTCTCGATACTCCC…	no					10.7507	-2.69633	-2.65528	4	722	Non-Horn
contig_159	GGTGTAAAGAAAGGATAGAGCTTTTGAGATGGCCGCTACCAGTGTTGTCGTTCTGGACAGAGGAAATAACACGACATGTACTATTAATTTACACGGTGCTACTGTCGTTTCTTGGAGGGTTAACAATCAAGAACAATTATTCGTCAGCAAACAAGCCGTCTTTGATGGAAAGAAACCCATCAGGGGTGGGATTCCTTTCGTTTTTCCTCAATTTGGACCTTGGGCATTTGGCCCCCAACATGGATTTGCTCGCAT	no					10.957	-1.55182	-1.89207	4	255	Non-Horn
contig_16	GGCATTGCTTTTGGCGAACAATTCATCGAATTTGGTCAAAATCAATGTGTTTTAGCTGTTGGTTTCGAAAAAATGGAACGTGGAAGTTTAGCTCCTAAATTTATGGATAGGACCAATCCAATGGACAAACACATGTCTTTAATGATCGATTTGGCCGGAATAAATGAAGCTCCACCAGCGGCCCAAATGTTTGGAAATGCTGGAGTTGAACATATGAAGAAATACGGAACCACATTGGAACATTTCGCTAAAATTGGTTATAAAAATCATAAACATTCCGTAAACAATCCTTACTCTCAATTCCAAGATGAATATACTCTCGAACAAATTATGGCTTCTCCGAAAGTTTTTGGTCCATTGACTAAATTGCAATGTTGCCCAACTAGTGATGGATCGGCT…	no					9.19052	-1.61209	-1.12717	3	720	Non-Horn
contig_160	GGTAGTCGTGAGAAACCGAGTGGGCAAACTGAACCGGCGGACGTGAACCCGACGACGACCCGTTCGGCCGTTCGGTCTCTCGCTCGCTGACAAAGAGGTTGCTCACGTAGCAAAAGTGTCTATTCACTTGAGAAGGAATACGACGTCCGAGGGCCGGAGGAGTGCATTGTGACAAGTGGCAAGTGGAAGCAGTCCCCGTGGCAATCATCTCGCAAATTACCGAACCCGCGTTGCCCGTCCGTTGACGAGTTGAAC	no					10.9743	-2.0904	-1.65336	4	255	Non-Horn
contig_165	GACAGTTACCAAAAATATCTCAAACAATCAACATGTTCAAATTTGTTGCTTTCGCCACTCTTTTGGCTTTCGCCAATGCGGGAGTTCCTTTGGGTCTCCATGGATATGCTGCCCCAGCCGTAGCAAGCTACAGTGCTGCCCCAGCTGTGTCCCACGCTTACATTTCAACTCCAGCTGTTGCTAAAGTAGCTGCTCCAGTTGCATACTCTGCTCCAGCTTACTCCACCTATGCCGCTCCAGTTGCCAAAGTTGCCTATTCCGCCCCAACTTATTCCACCTATTCTGCTCCATCTTACTCTTATTCCGCCCCAACCATCGCCAAATACGCACCAGCTCCAGTCACCTACTCCGCCCCAGTTGTAGCTAAATACGCCTCCCCCGTCGTAGCTAAAACCTACG…	no					10.8531	0.192821	-0.233327	4	678	Horn
contig_167	GGTTCAAAAACCATCGATGGTTATAGTAGTCATCAAAAAGTTGCCGTTACCTTTGCAACGGCTGATTCAATCCAACACATGTTGGTTGCGATGGGTTTATACAGGGATTATACACCGTTAAGTGCTCAAAATTATTACACCCAATCAAGGAGACGTTGGAAAACTTCCGAGATTGCTCCCTTTCCCGGCTAATTTTGTAGCCGTTTTATACGAGTGTGATCCTTCGCAAAGAGATATGTACAAAGTCATGTTTTACCTGAACGAGAATCCTGTTGATATCCCCGAGTGCTCGGTGGGGTTATGTTCTTGGGAAACCATCCGAAGCAAATATCAAGATGTCATCGAACAATGCCGACATTGTAGCGGCTCAGAAAGATCTCATGTTCTTTTAGGACTTTT…	no					9.94562	-2.39721	-1.72261	2	781	Non-Horn
contig_172	AGACAAAATAATACCGTAAGAAATGAAAAGAAAATGATATAAAAAAATGAATCTGTATTTTCGTATGTTGTAGGTAACTGTCCTAAATTAGTTTCTTTTTTCATTTTGAAAAATAAATTGTTATTGTAGATAATTATTGATCTAATAGTGTATTTAGCGTACAGTTATTTTTATATCATTGACCAATCAAGTTACGCTTTTTTGTCGATGTATATACGTATATATATTAATAAATTTGCAGTTGTTTATTGTTATTGATGTAAGAGCATCTGTTTTTTCGAATGCGAAAACATCTCTTAGTATTTAAATTAAATGAAAATTAAAAAAAAAAGAGAAAAATTACATAATGGTGACGGATGTATATTTGTGAATATATTGATGAATTTGTTGGACCAGACT…	no					9.92611	-1.61625	-1.5659	3	629	Non-Horn
contig_175	ACCTCTTTTTTACCTACAAATTAATGATGCAAAAAACACTTCAACTCTATATTTATTTCTACATTTTGATTACAATAAAAGCATGTTTAAATATAACCGTATCTTTAAATCAAAAGATTGAAAATCCCGGATTTCATAAGTTAGTAATAACACATTAATTAACTTTTATTTAATTCATCGTTTTAGAACAATTAATTGGTTACTAACTTTCGATAACGATATTAAAGAGTTAAAAACCGACTTTGCGCTTGCTTTGTATTTAAAAATACCCCCAGGAATTTATGTGAATCCCGATGAATTTGCCAGTTTGGTGCGGCAAAAAGAATTAAATGGGAGATTAATCGGAAAAGTGAACATTGAGTATGCAATGCATTTATCTGATAGTCATGAAGTAATGTT…	no					8.66387	-2.34091	-1.67962	3	789	Non-Horn
contig_180	AGTTGTATTTTCGTACACATTAGTACAATATGTTCACTAAATTGACCACATTAGCTTGCGTTTTGGCTGTTGCCAATTGCGCATGGAATGGTCCGTTAGCTGGGGGAGCTCCAGCTTCTTCCGTCCCAGCAGGAATTAGTGAAGCTGCTTGTCCGAATTATCCGCATTGCACTAATCCTAGTGTAGCCGTTGAACCAAATTCTCCTGCTCAACCACAATCTCAATATCAACAGTACCAACCTCAATACCAGCAACCACAATATCAATCTCATCAACCCCAATATCAACCTCAACAACAATATCAATCCCAACCTCAACAACAATATCAACCCCAACCTCAATATCAATCTCAACCACAACAATATCAACCCCAACCACAACAATATCAACAGCAACCAC…	no					13.0586	-0.708907	-1.45317	4	746	Non-Horn
contig_181	GACAGTTGGTCGTCGAAAGGTCCTAGGAAACCACACTTCGGTCATACCGTAACTGAATCTTTTAATAACCGTTATTTATCCAAGAAAAATTCAACAAAATGCGTGAATGTATCTCAGTTCATGTTGGCCAAGCTGGCGTCCAAATTGGTAACGCTTGCTGGGAGTTGTACTGCCTTGAACATGGTATTCAACCCGATGGGCAAATGCCCAGTGACAAAACCGTTGGGGGAGGCGACGACAGTTTCAACACTTTCTTCAGCGAAACTGGTGCTGGGAAACACGTTCCTCGCGCAGTTTTCGTTGATTTGGAACCCACTGTTGTTGATGAAGTAAGAACTGGAACATACAGACAATTGTTCCACCCAGAACAACTTATCACCGGAAAGGAAGATGCTGCCA…	no					13.8687	-1.98059	-1.78257	3	1091	Non-Horn
contig_185	GGTTATTCTTGATTACGCTAGTTAGATGCTAGGGATCATGAAAGTTGTCATTTTCGCTGTTATTTGCCTATCGGCATTGGCCATCGCCGAAGAATCCTGCTACAAAGACATCAACGATGCCTGTAAAGCCACAAACAACAAAAAAAGTTTTATTACCACTCCAAAATGTAACGCAACTTATGGAGCCATCACTGCGGTTTTACCAGATTTAAGAAACTACGCAGCTCAACACATAACCCATTCCTTCGAGTATCTCCTTTTATCAACTCATTATGGAAATTATGAAAAGAATCGTGATGGTTTCAAGAAATTATTCCAAGAGCTTTCTGATGAGAAATGGGGGGCTTCGATTGATTTAATTAAATACATTGCACAACGTGGTGGTGATATGGATTGGAC…	no					12.3704	-2.23321	-2.46421	4	952	Non-Horn
contig_187	GGTCAATGTCAGATTATTTATAGAACAACCACCAAATGTATTTATAATTCTAAATATATAATAATTTAGAAGTCTTTTTCATTAAAAAACGGTCAATTTATAATGTCCGATCCGGAATTAGAAGAAATTCGGAAACAGCGTCTCGCCCAGATGCAATCTCAATTCAATGCTGGTGATGGATCGAATCAAAAAGTCCAAGAAGAAAAAGCGAAACAAATAGAGGATATGAAAAATTCTATTTTGTCCCAAATTTTGGATCAACCAGCGAGAGCAAGATTGAATACACTCATGTTAGGAAAACCAGAAAAGGGAAAAATGGTCGAGTCTATGTTGGTCCAAATGGCTCAAAGTGGACAGATTAGAAATAAGATTGGGGAAAAAGATCCCGTAGGTTTATTG…	no					10.2434	-2.09274	-1.32435	3	596	Non-Horn
contig_189	GGGTGAAAAAAAAAAGTCACAAAATGTCAGTTTCTTAATAAACGAAAAGCCGTCGAAATTGTACTACTTTTACCGTATCGCTAAAGATTTACAAAAAGAAAACAAAACTTTCCTTTCGTCTCTTCATTGTACTCAGCCGTCAGTTTTAGTTGTAAAAGAAACGTACGTAGCTTGAAATGTCCGCAAATACATCTCCTTTACATTACAACGACTTAGAAGAAGCATACATAACAGATGCCAACTTTAAAGTAGACATAAGTCAGAAAATGAAAGTGCCCCATAAAATCAGTTTTAATTCGGAAACTCCTTTGAACGGAGGCAATCATGCAGCTTGGCAAGAAAATATTAATATGCAAGTACCTGAAAGGATATTAGTTGTTGGAAGTGATCAACATTTAG…	no					10.0884	-2.13547	-2.05701	2	754	Non-Horn
contig_190	GCCTTTTAGTGTGGCTCTTTTACAAGATGGCACCGCCAAAGCCAAAGTCAGCGGATAAACCCGCGGCGAAAAAAGAAGAAAAGAAGAAGACGGCCCCAGCCTCTGCGGCTGGTGGTTCAAGTAAAGCGGCTCCTGCTCCAAAAGCAGCAGCTGCAAAACCTGCATCAGCACCAGCTGCTGCAGCTCCAAAACCAGCCGCGGCTGCTCCTAAACAAGCTGAAAAGAAAGCAGCCAAACCGGCAGGGAAAAACCAGCGACTGCTGCTAAACCAGCAGCGAAAAATGTAGCAAAATCAACAACTGCTAAGCCGAAGGTTGCCGCAGGGAAACCTTCAGCGAAAAGCGTTAAAAAGCCAGCATCTAAAGTTACTGCGAAACCGAAGGCTCCTGTTAAATCTGT…	no					13.0208	-2.14911	-2.40201	3	703	Non-Horn
contig_196	GAAACAGCCGGTGCTCGCCGGATGACACACAACAAATCGAATTGCAATGGCGTACTCGAAGGTGACACTTACGATTTTTGTATTTTCTTGTGCCTTCTTATTAACCACTGGACTGAAAAATGCCGTTATTAATCTCGATGAAACGAATTGGACGGATATGTTAAATGGTGAATGGATGGTTGAATTTTATGCCCCATGGTGTCCAGCTTGTAAAGCTTTAGAATCAGTTTGGAAAGATTTCGGGACTTGGTCAGAAGATTTAAGTATCAAAGTTGCAAAAGTCGATGTAACTGTATCGCCAGGACTTAGCGGACGGTTTATGGTCACTGCCCTACCAACGATTTTTCACGTTTTAAATGGTGAATTTGGACAGTACAAAGGTAGCAGAGATAAGGATAC…	no					9.9929	-2.08967	-3.25134	3	764	Non-Horn
contig_198	GGAAAAACAATTGTTGGTTTCAGGGAAATATGGAAATTATGTTATACTTTTTTATCCCGGTCGGTATTCTTCTGGCGGTCAATTTAGCTTTGTTCATCGCTACAGCAAGAGAACTAACTTGTGGCCTTTGGAAAAGAGAACTTGTGAAGTCAACTACGGAAAGAGCTGCACTTGGCCGCGTATGTCTAAAACTCGTCATTGTAATGGGAGTCTTTTGGATAGCAGACATCATTTCTTGGGCTGTTGGAGGTCCTCATGAATATTGGTACTCTACGGATATCTTCAACTGCTTACAGGGAGTTTTTATCTTTATCGTCGTCGGTTGTCAACCACAGGTATTGGCTGCTGTTAAACGCTACTGGTGTTGGCGTCGAGGCAGCGCTGTTGAGACCGCAGGAA…	no					9.98356	-2.42457	-1.46223	4	799	Non-Horn
contig_20	AGTCGTTCCGCGATGAATGCTTCCGTTGGTGGCGCAGGCGATGCTGTTCGCGAGATGCGACATTACGCAGCGACATTTTTAACAACAATTTCATTAACTCCCACAATTTTTTTAATACTTTTAATATTATTTTGGGTAAACTATTCGAAAAAACTAAACAAATTAAAAAAGAATTCTTCGCGGACGATTCCGGGTCCCTTTTCGTTACCCGTTTTGGGCACAAGATGGGTCTTCTCGAAACTGGGTGGTTACAAAATGGAAAAAGTACACGAATTTTACGAGGATATGTTTAGAAAGTACGGTAGCATCGCTAAAGAGGAAGCTTTATGGAATATACCGATTATTAATGTTGTTAAAAAGGATGATATTGAAAAAGTATTGAAGTGTAGTGGAAAATAT…	no					9.83193	-1.9921	-2.05483	4	752	Non-Horn
contig_200	GGATGTCAAAATAATTATCTGTCAAGAAAGGTGATACTAACAATTTTATTTATATTGATGAAAAATTTTGCGTTATAACATAAAATTAAATAGAAAATGTTTCAATTTGGATTTAATATGTTCCCCGAGGTTCCGCGGCCGTTTCATACAACTTATAAGTGTTATTCAGTGGCAATGCTACCGGGTAATGAACGGCAAGATGTTGAACGAGGAGGGAAAATTATAATGCCTCCATCCGCATTGGAACAACTAACACGATTAAACATTAATTATCCAATGTTATTTAAAATAACCAATAAGCGGACGAATTGTAAGACTCATTGTGGTGTCTTGGAGTTTGTAGCCGATGAAGGGAATGTTTATTTACCGTTATGGATGATGCATAACTTGGTGTTAGAG…	no					10.8175	-2.38986	-2.5787	0	695	Non-Horn
contig_202	GTCTCAGTCGATTGGGGACTGAGGTGTCATCCGCATCTATACTAAGTACGCGATTCAACGCACGATATGTCGCCAAGTATGAAGTGTTTTGATGTGATCGAACGTGTTGTGCCGCTGAAAACTTCTTGGCGTGGATTATTCACAATCTTTTTATTTATTAAAATGGCATTAGTAGTAAGGTATATAGAAGATGTTAACAGATTTTTAAATAAATACCAAGATACTAGAACAGCAGATTGGTTTTTAATGTCTAGCCCATTTTATACATTAGCAATTTGTTTATCATACGTGGTAGTGGTAAAGTATGTGGGGCCAAGGCTTATGGAAAATAGGAAACCCTTCCAATTAAAATATACCTTAATAGTGTACAATCTATTGCAAGTTCTATTTAGTACCTGG…	no					9.76674	-1.57427	-1.16018	2	644	Non-Horn
contig_203	GACGTCAAATTTTATCACAAGAACTGTCATTTCCTTCTACTTCCATCCGAGAAGAATTACGCGTGCGAGAACGATGAGAAGATAATCGGATTCATTTTCCTCGATTAATACGAAAAAAACACGGATCGTTTACCGTTTAGGAAATTGAAAACGATGGCGGACGATACTTTGGGGTACTTAAGGAGGCCGGAAATCTTCGGGATGATGTTGCGCATCGTTTTCGTATCCGCGATGTCTTACTACGGGATTAAATGGTTCATGAACCAAGTCGATCCGACTAATAAAAGCAAAAAGAGTGCGCGAAAAAAAGCCACGGAACAATTAGCGCGGTTAGCTAAAAGTGGAAGTCACGTCCTTCCGATAGAAAAATTATCCGATTATGAAATTATGATAGCTTCT…	no					10.0811	-2.13046	-3.42304	0	486	Non-Horn
contig_206	GGGATTTGACGTTAAACGTCAAAAAGATTTTATGCCAAAAAAATGGCAAGTACGCTGGTTAGATTTAGTAATGTAGCAAAAACACAATTGGGTAAGCTTGTTTTAATTAAAACAACCCCTTTAACAACTCCGAGTGTTGCTGCTCCTTTAGTTAATCATGCCCAGGTTGCTTTCTATTCTCAACCGCCACCCCAAACGAAAACTAAATTTGGACCGTTGGCTGATGAAGATCGCATCTTCACCAACCTATACGGAAAGCACGAATGGAGGCTTAAAGGAGCGTTAAAACGCGGGGATTGGTATAAAACTAAAGAGATTATTTCAAAAGGAGCCGATTGGATTATTGATGAAATTAAAATCTCTGGTTTACGTGGTCGTGGTGGGGCTGGTTTCCCATCT…	no					9.84925	-1.83708	-2.01231	2	436	Non-Horn
contig_210	GGTTCTCGAGCCGACACCGGCTCGCCCAGTTGAACGTTTGTCGCGTATACGGAATATCCGCATTTTGTAGCCACAAGTTGTTCGTCACAGTGCCAGGTGTTAACCGAGTCTGTGTTTCTAAATTAATTAATTAAAAATTTCCACGATGACGACGACCATACCCCAAGGTACGTTCCTCGACGTTCTCAAAAAGAAGATGAGACAGGCAAAGGAGGAAATGGAACGGTACAAGGACGAATGTGAGGAATACAACAAACGACTTCAGGGCGAGATCATGCGACGTGAAGAAGCTGAATCTGAAGTTGCAGCTTTGAACCGTCGTATTCAGTTGCTCGAAGAAGATTTGGAACGTTCCGAAGAACGTTTGGCAACTGCTACAGCTAAATTAGCCGAAGCTTC…	no					11.9239	-1.86725	-1.7839	4	1238	Non-Horn
contig_212	GCTTTTTTTACGCGAGTCAACATGGCTGACGCAAAAACGCAGAAGATGTCGGAGAAGAGTAAAGAAGTGAAAAAGCCGGGAAAACCCCGCAATTACGACCTGGGAAACGGAATTTATCGGTTTTCCCGAACTCGTATGTACCATAAAAAAGCAATTTATAAATTTTTGGGGAAAAAAGTCGCTCCGAAAAAACCCAAGACGAAAACCCAACAATTCGCTGAAAAACCAATTGGTGGCGAGAAAAACGGCGGAAAACGCGTTGTTAGAA	no					13.0964	-2.25045	-2.46009	3	268	Non-Horn
contig_216	GACAGTTACCAAAAATATCTCAAACAATCAACATGTTCAAATTTGTTGCTTTCGCCACTCTTTTGGCTTTCGCCAATGCGGGAGTTCCTTTGGGTCTCCATGGATATGCTGCCCCAGCCGTAGCAAGCTACAGTGCTGCCCCAGCTGTGTCCCACGCTTACATTTCAACTCCAGCTGTTGCTAAAGTAGCTGCTCCAGTTGCATACTCTGCTCCAGCTTACTCCACCTATTCTGCTCCATCTTACTCTTATTCCGCCCCAACCATCGCCAAATACGCACCAGCTCCAGTCACCTACTCCGCCCCAGTTGTAGCTAAATACGCCTCCCCCGCCGTAGCTAAAACCTACGTTGCCGAACCAGTTGCTCCAGCTGCTTACGATTTCGCCTATGCCGTCAACG…	no					10.6339	0.210576	-0.29672	4	653	Horn
contig_218	GGAAGTATACACCATAACTGTAAGACACGTATGTGTTGTAAAACTGTCCTGTCAGTTGAGTTACTCTCGTAATTATCATTCGAAGTTTTCTTAAATCCAACGTGGCAAGATCGAATAGACCATGGGGCTAACAATTTCTAACGCTTTGAATCGCCTTTTTGGAAAGAAGCAAATGCGGATTTTGATGGTCGGTTTGGATGCTGCCGGTAAAACAACGATATTGTACAAATTAAAACTCGGCGAGATCGTTACTACTATTCCAACGATTGGGTTCAATGTTGAAACTGTCGAGTACAAAAATATTTGCTTTACTGTTTGGGACGTGGGCGGCCAAGGAAAAATTCGTCCTTTATGGAGACATTACTTCCAAAACACCCAGGGACTTATTTTTGTCGTCGA…	no					11.2076	-1.91769	-2.81789	3	829	Non-Horn
contig_221	CTGATACACAATAATTTATTTTCGTTTATAGCACATCGGTACGTTCTTAAAAATAAAAATTAATTTCTGATCCTTAAATACATAAGTAGTTACACTGTAATTTTCATCTAGGTGTTTTTGAATAACTATTTACATATTTCCCAATGATATTGTCTTAAAATTTACACTTGATTACAAAATTGGGTTCGCATCGATTTTCTAATTATAAGTTTTTTAAATGTTTGTCCTAAATACATTCCACTTTTTATTTTTTCT	no					8.02017	-1.58546	-1.74212	3	255	Non-Horn
contig_226	GGGCACATTCTCGTTTTTAATGCCGTTCTTTGTTGCTTGTTCTACTTTTGGATCCTTAAACGGAGCTATTTTTGCTTCATCTCGATTATTTTTTGTTGGGGCGCGTCAAGGACATCTTCCGCAAGCCATCGCATTAATTGATATTAAAAGACTCACCCCGGTACCTTCATTAATCTTTATGTGTATAATAACCTTAACTTTTGGTTGTAATTGAAGATGTTTACGTATTAATAAATTACGTATCATTTGTGGAAGCTTTATTTATAATGATCAGCGTAACGGGTCTTTTATGGATGAGGCGTTCGAGGCCGAACGCTGAAAGGCCTATAAAAGTAAATATTGCGCTTCCAGTGATATTTTTTATAATATGCGCATTTTTGGTGACTTTTCCGTGTTATG…	no					10.2167	-2.08628	-1.59871	4	880	Non-Horn
contig_227	TACCTATTTAAACTGTCAGATTGAACAAATCAGTTCACTTTTTGCGTTTTAACGTGTTGAATTAACATATTAGATTAGCAAGCTGCGAATATGTTAAGGTCTCTAAAATCGGCCGTTGGTAAAATACAACGATGTCATTTCTCCGCTCAAGCTTTACCACAACCTGAAAGTCAACCAAAAGTTCTTTATTCCGGTATTTTTATTAACAACGAATGGCACAAATCACGATCAGGGGAAACTTTCGAAACTTTAAACCCATCAACGGGAGAAGTTATCACGGAAGTTCAAAGGGGTTCAAAAGCTGATGTAGATGCCGCGGTAAAAGCAGCAAGTGATGCTTTTAAATTGGGATCTCCGTGGCGAAAATGGACGCCTCTGAGAGAGGTCGTTTACTCTATA…	no					11.9779	-2.23586	-2.46553	2	690	Non-Horn
contig_230	CTCGAATCGACTTTCGTCGTGTTCACTGTGGTCCTTTGGTTCCATTCGCTCTTTTGCCAAGAAAATGGGTCTCCCACGTGTTTACTTTGATATGGCTTCGGACGGCCAGCCCCTCGGCAGGATCGTTATGGAGCTCCGTTCGGATGTAACCCCAAAAACGAGTGAAAACTTCCGCTCTTTATGTACCGGGGAGAAGGGCTTCGGTTATAAAGGTTCCACCTTCCATCGAGTGATTCCAAACTTCATGTGCCAAGG	no					12.392	-1.93908	-2.24355	3	255	Non-Horn
contig_235	GATGTCATTCGTTCTTTAGGGAGGTGTCGCAGTTTATTCTCGAAAAATCTAAAACATCTCGTGATAAAATCGTCGAATTTACAAAGAACCCGCTAAAAGACGAAATGACGGCCCCAACAGCAGCAGGTGATGTTGGAAGATCGCAAATTACCGCTTATAAGGATAAAACCAAACCGGCCGATGTCCGGCTGAGCAACATAAATGCCGCTAAAGCTGTTAGTGATGCTATCCGCACGAGTTTGGGCCCCAGGGGTATGGATAAAATGATCCAATCTGGAAATGGGGAAGTTACCATCACAAATGATGGAGCTACTATTTTGAAGCAGATGAATGTCATTCATCCAGCAGCTAAAATGTTAGTTGAATTATCAAGGGCACAGGATATTGAAGCTGGTGATG…	no					11.5353	-2.75373	-1.86801	4	717	Non-Horn
contig_238	GAAATAAAAACTTCTCTTTCTATTGACCAGATTTTGCGTATGTCAAAGTGTTAAATCTAAGAAAACATGGCAAAGTCGAAGAATCATACAAATCATAACCAAAACAGAAAAGCCCATCGTAATGGTATTAAAAAACCAAAACGTTTCAGGCATGAATCAACTTTAGGGATGGATGCTAAATTCTTGAAGAACCAAAGGTTCTCAAAAAGGCATAACTTGAATCCAGCCCAACAAATAAAACGTGCCAAACAACACAAAGCTGAACGTGAAGCCAAGAAAAGTGCAAAATAAATGATTTGTGTTTTTAATGAAAATAAAACTTAAGTTTCTAAGTT	no					10.8005	-1.82745	-1.90087	2	335	Non-Horn
contig_239	GGGTTTAAGTCCTATTTTGGGTAGACACAACACAATTGATCACTTACTTCCGTTGTTCCTTGCACAACTAAAAGACGAATGTCCCGAAGTAAGATTAAATATTATTTCAAATCTGGATTGCGTGAACGAGGTGGTTGGTATACAGCAATTATCTCAAAGTTTATTGCCTGCAATTGTTGAGTTGGCGGAAGATTCGAAATGGAGAGTTCGATCGGCTATTATTGAGTATATGCCATTGTTAGCAGGACAACTTGGTCAGGAATTTTTTGATGAGAAATTGAACGCGTTGTGCATGAATTGGTTAATGGATCATGTTTTTGCAATTAGAGAAGCTGCAACTCTTAATTTAAGGAAGCTAGTAGATCAATTTGGGGCTGAATGGGCCGAAACGACTATTAT…	no					11.1965	-2.80015	-2.30233	3	927	Non-Horn
contig_241	GAGATGTCGCGGCGATCGTAAAAATTCTCAAGTTGATTGTGTCTCAAGTTGACGTTTCGTGCGAATTAGCATGTTTACTACTTTATAGTGCATGTTTAAACTTGCGCCTTGGATACGATGATAAAAATGCGTAAAATAATAACGCGCCGAAGTCGCATTTAACCGCAACATAAGGCACTTAGGGCCCCATCTTTTACCGACTCTACTAAAACCAATTTCAAGCCAAAATGGCAGAACAGCCTGGAAATACTCCGAATTCAGTACGACGTCCACCCGCTAATTTAGGCACTTCCGGTGGTGGGAGGCCGAAAATGATGTTACCAAAGGTTCCTGCTATGAACGATAAAACTAGAGAAAATACGCGATTTAGAATGTGTCAATCCATGCAATCGACGGGTA…	no					10.4054	-1.65733	-2.60494	3	705	Non-Horn
contig_246	GTCACAGAAGGAGGTGAAGAGGTCGCTGTTAAATCTCCTACCGAAAAGGAGCAAGTCCGAATACGAACGCCGTCTACGACGACGGCCGAAGAAGCAGTCGATCAACTTCAAGCTAGTGAAAAATTAATTGCAGAACTAAATGAGACATGGGAGGAAAAATTAAAACGTACGGAAGCAATTCGATTACAACGCGAAGCGATATTCGCGGAAATGGGGGTCGCCGTTAAAGAAGATGGCAACACCGTCGGCGTATTTTCTCCGAAAAAAACACCCCATCTCGTAAATCTAAACGAAGATCCTTCAATGTCCGAATGTCTCATCTACTACATTAAAGACGGATTAACACGAATCGGCTCAGCTGAAGCCAACGTTCCTCAAGACGTCCAACTTTGCGGTTCT…	no					11.3033	-1.97074	-1.74104	4	617	Non-Horn
contig_248	GGAGGTTGATAGGCTTGAAGATGAATTGGGTATCAATAAAGATAGATACAAGTCTTTGGCTGACGAGATGGACTCCACCTTCGCCGAATTGGCCGGCTATTAACCCATTGAAACATCTACACACTCTGTTAAGTTGAGTCAACACCAAAGAACACGCGGTTATTAATAACGATAATAATAAAATAAAAAATTATTAATTATTATTTGAGGTATAACGTTTCTGTGCTATTTAATTTAATTGTACCTATGAACATAATAATAAAAGGTGAACTATTTATTTAAAAAAAAAAATAAAATTAAGATACGTCATCACACAAGGAGCAAACAATGAGTTACATTTCACTTAATATTAAAGATCTATTTTTTAGTTAAGTTTTATTTTTAAAAATGGCAATTTGA…	no					8.84667	-1.36798	-1.28731	1	431	Non-Horn
contig_249	GAGTCAACGATCTACCATCATTCAGTAAAGCTTCCTAAACCATTGTGAACATCATGGCTAAATTCTTAATCATCTTAGCTTGCGCCTTTGTAGCCGCATCTTGCGCTAATACTAAGCGGCGAGCCGAAGATAATGAGGTATCAGCCGGAGGTCACTTTGAATCAATCTCAATTTCCGACGATGGTGGTCATGGAGGTGGATATGGAGGAGGAAAAGGATTCAGCGCTGGGAGTGGATTGAAGACCATCGCCCAAG	no					8.16628	-1.3326	-0.839723	4	255	Non-Horn
contig_25	GACGGACAATCGTTAAGTTGGGAGGGCACCGGTTGACATTCTTCACCGCACCCAAAAGAAGGTTTCCCCACCGGTTTCCATCCATCGCAAAACCGTTTTTTTCCTCGGTCGATCGATTCAAATTTCCGGTTAACCGGAACGATTGAAAAGAACAAATAAATTCGGTGCCGTATGTTGATTAGCGAACTGTGCGCGTCGTGATTCACATGGTACTTCGTGTCGAACAGTGCAACTTGTATGGGTGTACGACGAATACGTTGTGATCCGGAAGGTAGAGTCGTTGGATAGCCCTAGGTTTCCCGGTTTTTGGGGACTCGTACTCGGTTTTTTTGAACGAGGTGCAGTGTTTTTTTCTTAGAGTGAGGTTAAATACAGTATGAGCGAACTTGATTCCCTTAG…	no					11.192	-1.45132	-1.18727	4	696	Non-Horn
contig_250	ACGAACGACCAAGCCACCACTGTCGAGGCGGCGCCGGCACGCGAATTTCATTCTCTCTCCATTCTCACGAATTTACGGCTTACGGTCAGTGTTAAAACCAACGGTATAACGGCAAAATGTCTTCCTCAGTCGCGAGGACTTCAAAGTACACCTACAGATCAACCGGAGGCGCTGCAAATGCGGACGTCAGCATCGAATACAGTGCCGATCTTAGCGCCCTGTCCAGGCTTGAGGATAAGATCCGCCTGCTGCAGGACGACCTCGAGATCGAGAGGGAGCTCAGGTCGCGGATTGAAAGGGAAAAAGCCGATTTAAGCGTTCAAGTAATCCAACTCACCGAGCGTTTGGAAGAAGCTGAAGGCGGTTGTGAGACTCAATTTGAAATTAATAAGAAGCGCG…	no					10.7787	-0.798879	-1.74182	4	704	Non-Horn
contig_252	GGCCGGCCATTCGTGTAAAACCTTCGTACAGTGAGCGTCATTACGTCGCATTTTCACAACTTTTAGAACCTTTTAAGAATTAGCACATAAAGAAATTAAAACAAGATGGCAAAAGCACCAGCAGTCGGTATCGATTTGGGCACGACGTATTCTTGCGTCGGTGTTTTCCAACATGGAAAGGTCGAAATTATCGCCAACGATCAGGGTAACAGGACGACGCCCTCGTACGTTGCATTCACAGACACCGAACGTCTTATTGGAGATGCCGCTAAAAACCAAGTCGCTATGAATCCCAACAACACAATTTTCGATGCTAAAAGATTGATTGGACGTAGATTCGATGATACTACAGTCCAAGCTGATATGAAACATTGGCCATTCGATGTGATTAACGACAAC…	no					10.5609	-2.46873	-2.84726	4	727	Non-Horn
contig_254	GGTTTACCTGTGCGGGGAACGACGTCCACCATTTTGACTGAAGCCGAAAAGAGTGTTGAGGATCGTCCTTGGGAGTAATGGATGATCCGTCAAGGATGATGGGGCACACTGGAGGCGGCCTAATGGCCCCGCAACCCTACCCGATGAATCCCCAAGGCGATGCCCCCACCGGTGGCGAGAACGAGCCGCGCAAACAAGACATAGGTGAGATACTACAACAAATAATGAACATAACAGATCAGAGTTTAGATGAGGCCCAAGCACGCAAGCACACGCTCAACTGTCACCGTATGAAACCGGCTTTATTTTCCGTTTTGTGCGAGATCAAAGAGAAAACGGTTTTGTCTTTACGTAATACGCAGGAGGAAGAACCCCCGGATCCACAATTGATGCGATTGG…	no					11.321	-1.39329	-2.15989	3	703	Non-Horn
contig_258	GATCCGAAATAAACGACCCCGCGCTCACCTTGTATTAAAACTGGCGCGCGGTAAAAGGGAAGAAGAAGAGGAGAAAGTGGGCCAATCAGAACGTTCAAAACAACAACCACTACCACTACCGCTTCCGTTACCGTCCTTCTCCCCCCCGATATCCATCCGCGTCGCGTCGTTTTGGCCATTTTGCACGCGACCACCAACGCGTTCGGTCTAACAATTGTGTGTGCGTTATTTTTTCAATTTTCCAACGGTGAAAATCCCGGATTTTTTCATCAACAAATCGTGAAAATGGCCGATAATAAAGTGGAAAACGCTGATG	no					10.848	-1.70513	-2.58462	4	316	Non-Horn
contig_259	CGGGGACTTATAGAACGACCCCGGAGGATTTAAGACGTGTTTTTGAACGCTGTGGGGAAGTTGGGGATATCTATATACCCAGGGATCGATTTACGAGGGAAAGTCGCGGGTTTGCTTTTGTCAGATTTTATGATAAACGCGATGCTGAAGATGCATTGGACGCTATGGATGGGCGTATGTTGGATGGAAGGGAGTTGAGGGTTCAAATGGCTCGATACGGGAGACCCACTTCGCCACATCGAAGGTATAGCCGATCTAATCGAAGGAGATCTCGTTCGCGTTCAAGGAGACGTAGCCGATCTCGTTCATATCGCAGAAGATCGCCGAGTCGGAGTCGTTCCCGATCTGATAGTAAAAGCTCGAGGGGTCGATCCAGGTCAAGGTCTAAATCTGAGAAGA…	no					8.87365	-1.64458	-1.67755	3	974	Non-Horn
contig_263	GCTCAGTCTACGTACAGACGTTGCAAGCTTTCGATTCAAAGAAAAGTATCAAGTGCCCCCCCCCTACTACTTTCGGCCGACTATTTCTCAGCAGTAGCACCTAGCCCGGCAACCCAACCCCAAGGGAGAGCGAGCCACCCATCGTTGAGCGAACTTTGCGTAGAGCCGACGACGACTCCTCCTCAGTGATATATAAAGACTCAGTTTCCGATTTTGGCCACAAGTAGTTCACGTCGTCGTTCCATTCGGTTCACCACTCTCTCTCGCAGTCCGCATTAGGCAAGAAGAAGAAGCAGAAGAAGAGATGGATCAGGCAGCAGATACAACCGCCACAACTCCATCCGGAGATGCCCCAAAAGAAGTTGAAAAGAAACCGGTAGAAGAATCTGCCGCTCCTGC…	no					12.7427	-1.85512	-1.43604	4	1284	Non-Horn
contig_266	GGACATCACGTTNGGTGGTGGGGTTAGAAATAGTGAGAAACGGAAACTTCTGGAAGTTTAGCAATTTTTCACATTTTCAAAACCCGTGCATCAATCAGTGATAAACCGGCAAAATGGACCAGGTGAACGCATTGAAAGAAAAAGGTAACACTGCCCTAAATTCGAATCAATTTGATGAGGCGATAAAATGTTACACCGAAGCTATTGCCTTAGATCCGAAAAACCACGTTTTGTATTCGAATCGTTCAGCAGCTTACGCAAAATCAAATATGTACAACAAAGCCCTTGAAGATGCAGAAAAAACGGTCCAATTAAAACCGGATTGGTCGAAAGGCTATTCAAGAAAAGGGAGTGCTTTAGCTTATTTGGGTAGAGTCGATGAATCAATTGAAACGTACG…	no					9.74898	-1.63793	-1.19348	4	733	Non-Horn
contig_267	GGCCATTTTCTGTTTTCTCCTGAACGCGTCCGGTGGAGATCAGGTTGAATTGTCCAGCATTGATAAATAGTTTTTTGTAACATGGGTACACGTGTCTTCGTCGGCGGCTTGACCTACCGCGTCCGTGAGCGGGATATTGAAAAATTCTTTCGGAAATATGGAAGAATTAAGGAAGTTGCCATGAAAAATGGATTTGCATTTGTCGAATTTGATGACTACAGGGATGCTGACGACGCAGTTTATGAATTAAATGGAAAAGAATTATTGGGTGAACGCGTTTCTGTGGAAAGAGCTCGAGGAACGCCGCGTGGTTCAGATCAATGGAGAGGAAGTGGAGGAAGAGGTTATGGACCACCAAGAGGGAGAAGCCGTGATAAGTATGGACCACCGACAAGGACG…	no					11.5302	-2.06705	-1.8608	4	844	Non-Horn
contig_269	AGCAGTGGTATCAACGCAGAGTGGCCATTACGGGGGGGATACGTCAAAAGTGACAAGATTGACAATGACAGTTTGAAATTAAACATTCCAAAATATTTAGTAATGCGGCATTTAAATCGAATTTTTACGAATTTAACGTGTCGATGGAATCAGAAAGGTTATTAGTGGCGGCCGGATTAACGGCCGCAGCCGTTGTCGGCGCTTTCGTTTTTTGGGGCCCCTCAACAAGCGCCGGCGGTCGAGGGAGGTTAGCCGGGCTCGTTAATTTAGGAAAAACGTGTTTTTTAAACGCTATTTTACACGCTTTGGCCGCTTGCCCTCAATTTGTGGTGTTTTTAGAGAAGGATACTTCGATTAAAGACACGAGTTTGAGGTCAACTTTGGCTACGGTTTTATCAG…	no					9.16461	-1.98932	-2.58533	3	784	Non-Horn
contig_27	GGACTCGTAAATTTGTTTTTCGCCTAAGGTTGTCAAATAAACTTGTTAAACGTTGTACGATGGGACAAAGCCAATCAGGTCCGGGAGGCAATGATAAGAAAGAAGAGAAGGATAAAAAGAAAAAATATGAGCCCCCAATTCCCACTAGGGTTGGCAAGAAGAAAAGAAAAACCAAAGGTCCGGATACAGCCTTAAAATTACCTGCAGTGACCCCTCATACACGATGCAGATTGAAACTTCTAAAACTAGAACGCATCAAAGATTATTTGTTAATGGAAGAAGAATTTATCAGGAATCAGGAGAGATTAAAACCACAGGAAGAGAAGAATGAAGAAGAAAGATCTAAAGTTGATGACCTAAGAGGGACTCCAATGTCTGTTGGAACCCTTGAAGAAATCA…	no					9.61832	-3.37008	-2.01	4	1058	Non-Horn
contig_272	GTCCGAACTTTTCTTTTATTTTAATTTGTTTTTCTTGGGACTTTGAGTCTTGGAATTTAGGGGTGAGCCCCTGCCTAATTGGGGGTTATTCCAGCCACACCTCCAAAGAGGCAGTGTATGCTAAAATACCCCTTTCTAAAAATATACATAAATGAGATACAGTCATTAAAGAAACCTGAACAAAAATCCAAAAAAAGTATATTTAAAAAAAATATATTAAAATTAAGAAAAACGTAACGAGATAAAAAACGAAAGGCATTGTAATATTACTACTGTGTATGTTTGTATAGATGTAATGTGAAACAAAATAAAATTTAAAAAAATAAGAAAAAAAATTAAACTGCTTAAAAGAGGACAACGACGAAAGGGACACTCACGGCACTTCTTCCTCTATCCCCG…	no					10.5233	-1.00238	-0.759743	3	638	Non-Horn
contig_274	GAGTGTTCGGACGATTTTTACCGCAAAAGGACTGCTTTACTCTACTCCAAATCCAAATATGATCGTATAGAATCGTTTTTAAATCCCAATCCGAACAATCTTGCACAGAATTTCGTTTCTATTTCCCTTTTAAGCATTCGATTTTCACCCTAACATTTTCCACGGCACGATGTTCTCCGGACTTACAAATCAGGTCAGCTCATGGATGGGAAAGGCTGATGCTGAAGAAAAGGTTCCAACACCTACAGGAGAAGTTGCTACTACTCCAGAAAAGAAAGATACAAGTCCAACAAAGCATAGTAAACTGGATATGCTTTCAAACGTAAAAAGTCAAATTGGAGGAATTGGGGGGTGGTTAGGTTCCAGCATTCCAAAGTTGCGTAAGAACGAAGATGGTGA…	no					10.1911	-1.50717	-2.55555	1	1043	Non-Horn
contig_276	GAGTGTCAGTCGTGCGCTGATTTCGTTCGCTTCAGTAGTGCGCCCTATGAAACCACGGGAGATGCGTTCAGAGATCGCAACCGAATTTTAGTTTGTTATATTTTTTAAAGAAAATTTCGGTGTTTGTCGGAATTTTAAATAAACTAGATCCCAGTTTTTGGATCTTGTGCTGTTGTGCCGTCGAGGTCTTTTCGATACGTAAAAAGGCCGACCACCAGGTGTATTTTGTGCGCGGCCATCGGAGGCGACGTTGTGTTTCCGTTTTATTTTTGAGTTCTTCGTTAATTATTTTTTTATTTTTATTTTCACTTGGTTCGATTTTGTTATCGTCTCTTCGTACAACAACCAACGATAAAATGTCGCTGTTTTGGCGAACGGTGCTTGCTTTTGCTACAGTGT…	no					10.9938	-0.898522	-1.0255	3	727	Horn
contig_278	GAACACAACAACGACGGCTCTGTAAGTGAAATTTATTGTGACTATAGACAATTTTTGTGTGCATTAATATATTGTTATAGTAGAAACGCAAGCCTTAATCACCAAATTTACCGGTGATCGATAGATCTCATCGGTGAATACATCGATAAAGAAGATAAATTAGGAAAAGAAATAGTCCGTTTAGGGGGAGAGAGAGAGTTTTAGTTAGAGGGATAGTGAGTGGGTCGGTGCGGAAGGCGATATTTCGGGACGCGTAAGTAAACCCACCACGACGGAGTGCCCCAGGCAGCAGGGGCCACAAGCTCGTGTTTCGGGGAAGGACGTGGTTCCCCCCGCCAAGCGACGCTGGGTCCCCCCTTCTACTTTGCGCCATCAAGATGCAAACAGTACGCCGGAGAG…	no					11.604	-2.03574	-2.37	2	863	Non-Horn
contig_279	GGAGAACTTCCTTTTGTATGGCGGACTTTGTGTTCGCTTGATGTGTGTCTTGACAGAAAATAGTTTTAAGTGATCGACAAGATGTCGTTATCAACGGCACGCCCTTTGGTTAGTATCTACAGCGAAAAGTCTGAAGAGGTTAAAGGCAAGTCTGTTCGTTTGCCGGCCGTCTTCAAGGCCCCAATTAGGCCTGATGTCGTGAATTTCGTTCACGAACAAATTTCCTTCAATCATCGCCAAGCGTATTGTGTCAGCGATAAAGCAGGTCATCAAACTTCTGCTGAATCATGGGGTACTGGT	no					13.0346	-3.01585	-2.52229	4	300	Non-Horn
contig_281	GACAGTTGCTACTGAAGTGAAAGACGGCGAATGTGGCCAAGACATTAAAAAAAACAGGACCTCAGTGTGTGAAAACTTTTTGTTATTAATTAACATTAATTTTTAAAGAACGAGAAAGTTTAGATTTAAGTTTTTTAAAGAAACGAGAAAGATGGGGAAACAATTTGATTGGAATGGAAGGTTTATGTCGATTTGTTTTAATTTAATACTTTTACTTCGATCATCTTATGGAGCACAATATTTGGGAAAATCCTTAGGAAAATTGGGAGAATTTCAGCATGGAGTATCCGGTGAAGTATTCGCTGTAGACGGCAGAACTTTGCATATCAAAGACTTCACGTACGACGGACAGGGCCCGGCTGCATACTTTTGGGCTGGAAGTACAAAATCAGTTGGAAA…	no					9.30014	-1.86476	-1.32871	3	1237	Non-Horn
contig_282	GCAGTGGTATCAACGCAGAGTCGAGCCGGAACAGCGCTGCGAGCGAAACGTACTTGTCGAGAGAGTAAAAAGAGACTTTTTCAAGTTGAGTGCGACGGTTCTCGAAAATATAACAAAAATTGATGGCGGAGTTTGCCTCTAAACAGAAACAATTTATGGAGAAACAAATGGAGGAAGAAGCGAGCGCGACAGAAATGGATTGGCAACCTGAAGGTGGCTTAAACGTCCAAGAATATGATTGCGTGATTTGTAATCAAAGCACGCCTAGTACGGAGGATAAACCAATGGGATTAGTCGTTTTGGTGCAAGCTACTAGTATTATTGGACATAGAAGGAGGCAGTGTTACCCCGAAAGGGCCGTTTTACCAACTTGCGAAGAAGAAAAAGATGGATTAAGAC…	no					8.38417	-2.37941	-2.32967	1	737	Non-Horn
contig_283	GGAGTGCTGCGCGTGCCGTTGTAGCGGTAGGTTGAATTTCGTATGCTCGGTTATATCAAAATGGCGTTCAATGGAGACGGACCGCTGAATAAACGACAGAGAACGGATGTGGACTCATCTAATAACAGAGTTCATACCAGTAATTATGCAACAGAAGAACCTCGTAGGAAACGACAAGAAGAATCTAAGCCAAATCATGTGTTACTATTTACTATCATCAATCCAATGTATCCCATTACTGTGGATGTTCTTCAC	no					10.1593	-1.14629	-1.57847	3	255	Non-Horn
contig_284	GGTCACCGTACGGGACCACAGAGCGAGACCTGGAACATTTCTTCAGGGGTTACGGTCGTATGCGCGACGTTTTAATTAAAAATGGCTACGGCTTTGTTGAGTTCGATGACTATCGAGATGCTGACGACGCAGTTTATGAATTAAACGGTAAAAAAATTTTAGGGGAGCGTGTGACTGTGGAAAAGGCCCGCGGAACTCCCAGGGGCCGAGACCAGTGGTCCAGCCGCAACGATTACCGCTCCCATGAACGTTACGGCCCCCCAACCCGCACCAACTACCGTCTCATCGTCGAGAACCTTTCGTCTAGAGTCTCATGGCAGGACCTCAAGGACTATATGCGCCAAGCCGGCGAGGTGACCTACGCGGACGCTCACAAGCAACATCGCAACGAAGGGGTCG…	no					10.8719	-1.75906	-2.05002	4	848	Non-Horn
contig_289	CGTATGGCCCATTCACGATGACGACCCCACAATACAGCCAAGACGCGGAATTGTGAAACAAATCCTTTCTGGGGACTCGGTTATTATTCGAGGTACCCAAGGGGCTCCACCACCGGAAAAACAACTTAATTTTTCTAGTATTATCGCTCCGAAACTTGCCAGACGTGCCACGGAAAATAATGAAGTCACTAAAGATGAACCTTTTGCTTGGGAAGCTAGGGAATTCCTTCGAAAAAAACTCGTTGGTGAGGAGATTTGGTTCACTTCTGAGAAACCACC	no					9.76664	-1.57685	-2.1203	2	279	Non-Horn
contig_294	AGATGCCGTGGTTTAAAGGGTGGGTCGTTGAAAGAAAGGAAGGTGGCAAGGCCGAGGGGAAAACGTTGATTGAGGCTTTAGATGCGATTTTGCCTCCGAGTCGTCCAACGGAAAAACCGCTAAGACTTCCATTACAGGATGTCTACAAGATTGGTGGAATTGGTACAGTTCCTGTTGGTCGAGTCGAAACAGGTATTTTAAAACCAGGAATGGTAGTCGTCTTTGCTCCAGTTGGTCTGACCACTGAGGTGAAATCGGTTGAGATGCATCACGAGGCTCTCCAAGAAGCCGTACCTGGCGACAATGTTGGTTTCAACGTTAAAAACGTTTCCGTAAAAGAATTACGTCGCGGATACGTCGCTGGTGATTCTAAAAATGCACCTCCCAGAGGAGCCGCCG…	no					9.83016	-2.16918	-1.9512	4	527	Non-Horn
contig_295	GGTAGAACGGCACCGTCCTCGCCGCCGTTAAGACTACCGCCGTAGCCGCGCCCCCTTCCCCCAACCGGAAAAAAGGGGCCCCCGTCGGGTTATTTAGTGGTATACGGTGAATAAGTAGGGCGAAATCCGCCATGTGACCCCCCAATTAATACGTGCGCGGTTCGTGTCACACCCCGCGAAGGGGCGCCGGCCCTTGCAACTTAAAAATTATATTAATCAAGATCTGTGATAACAACTAGGTTAGAATTTTATAAATTTAGTGAAAATTCAGAAAAAAATTGTTTAGTGGTCACTTTTACTTTGCGCTTTAACCCCGATTATGGCCGTCAGGATGGAGGTGGCCCCCGCAACCGCCCGGAAAATCAACTATAAACTCGCGAGTGGTAACGGCGATTTAAG…	no					10.8762	-0.821574	-0.669117	4	1230	Non-Horn
contig_297	ACAGTGTCATTATGGTTGTTGTGTAAATACGAGCACGTTTTTGTTGTTGGCCGATTTGTGTAAACAAAAGCATATAAATTGCGAAAAAAAAGAAAACGGAAGGGTTCGTTGTAAACGGTTCGTGTTTGAATCGCGCGCCCTTTTTCCGTTTTCTTTGACAAGTCGGTACATGAGGAGCCGGGACTGTCGTTGGTGGTGTCAGTAGTGAATCAAGATGGCGGCGAGCGACGATGAGCCTATGCAACATTTATACGAAGTTTTTACCACTTGTTTCAATAAAATCGCTAACAAAGCACCCGAGAAACCGGGGTTTCAACCGCCATACGGAGGAATCGACAATGGCATGGCGTACGCTCTAAGTCCCGCGGGTCCGGGATATGCTGGTCCGGGAGCCAGTCC…	no					8.58984	-1.44436	-1.45349	3	932	Non-Horn
contig_298	GAGTGTCGGACAGTCGAGCAGCGCGTACGTGAGCTGTGCCCCTCGGAATCCCTATCGTAACAATTATAAAAAAATAATAATAAATAACGCGGGGTGTCGCGAGTGATTTTCACGGTCCGTCGGTAACTGTTTTCAGTTCGGTTTTGGTTTCTCGGTACTAAATAAAAAAGTGATCCGTTTCCGTCGGTACTATGATGTGTTGGTGGTGTTTGAACGCGTGCGACCCTAGAGAACTGCCATACAGGTGACGGTACCGATTTATCGGATAACTTCTATTCCTTAAAAGGATTTTCGCCGTGTAGAAATGGTGAACAGCGAATCCATGGAAGCAGCGAACGATGCCAACGGAACGGAACGCGTCACTCAGCTGAACACGGCACCGGCGGATCTTCATTCATC…	no					8.80975	-1.21481	-1.02619	2	905	Non-Horn
contig_3	GACACTTCTTGAGATACACTTCATTCAGTAACAACAAAAAAAAACCTCATCAATATGTTCAAAGCTGTAGTATTCCTTGCCGCATTGGCTGCAGTCCAAGCTGGAGGATTATTAGAACCTGCTGTTTACTCGCCACAACTTGCATACTCAAGTTACGCCACACCAGCTGTAGCTAAGGTAGCTACTTATGCTGCTCCAGCACCACTTACGTATGCAGCTCACGCTCCAGTTGCTTACTCAGCACCAGTTGTTGCG	no					10.3411	-0.424683	-0.457032	4	255	Horn
contig_307	CATAAGAACCACTCCCGGCTTTTTGACAGAAACCGAAATAATTTCGCTATCCATCATTTTTACATTTGTGTATCAATAAATATTGAAGAGGATGGCGGTGAACGTTTATTCAACGAATGTAACAACAGAAAACCTTTCGCGGCATGACATGCTCTCTTGGGTCAATGATTGTCTCCAAAGTAGCTTTGGAAAAATCGAGGAATTATGTACAGGGGCCGCTTACTGTCAATTCATGGATATGCTCCTTCCTGGATCTGTTCCACTCAAACGAGTCAAATTTAAGACAAACCTCGAACACGAATACATACAAAACTTTAAGGTGCTTCAAGCTGGATTTAAAAAAATGAGTGTGGATAAGATTGTGCCCATCGATAGGCTGGTTAAGGGCCGTTTCCAGGA…	no					10.0162	-1.85288	-1.81521	3	736	Non-Horn
contig_308	ATGACAAGTTAAAAACCTGCTGGGTTAAACGATTGTCGTGTCCAAATGTCACGCGGTTAGAGTTTCCCGAGCTTTTTCCTTTACAATTATTAAATAAAATGAGTGAAAATGCACAAGAAAATCCAACGACTGCGCCCGCAAGTGGACAATCCGGTCAAAACCAAGAAATCGCACCCGCCCAAAATCAAAATGAAAATTCGCCAGCACAACCCCAAGCAGCACCCCAACCCACCAGGATGGAATCAGTAATGGCCATCATAAAATCATTAATTGTCAGAGGATTAATCATTTATTTCATCACTTCATTTTTCCGAAAAC	no					9.79761	-2.11286	-2.42458	2	318	Non-Horn
contig_309	GACTTCAACTTCTTCTTCAGTCGCGGACACACTCGCGCGAGAGCTGTCAGTTGTGCTTAAAACACTTCGATCTTCTTGCATCGCGCGTGGTTTTATCTCTTTCTAACTCTTTCGGTTTTTATTGTCAAGTAACATGTGCTCAGAGAAGATTTTATTATAAACTCTTTAATTGTTGAATTTTTGAGAATCATTAGGCTTCAAGAAATTGACAACGTAAAGGTAAGTGAAAATAATAAAATGTGATAAATTATTGTTTGTTTTCGTATTTCATAAAAGATAATTTTATTGACGTGTTTATAATTATCAATTGATAAGTTAATCGAATAATCATGTAAATGTTTTTGAATTGGACGGGTAATCATGTCACAAATATCATAAACTTGCATATTAATACAGATT…	no					8.53566	-0.924479	-1.57634	2	745	Non-Horn
contig_311	GTACAGCGACACGCCGACCGGTTAAATTCAAAAAGCAGCCCAGAGACATACAGACTGATACAGATTTGAAAGAAGAACATCTTTTTCATCAAAGAAATCTTAAACTATCTTTTATTTACCAAACCAAAAATTTATAAGAAGTTGAAAAAGAATTTGAAAAAATATGTCGTCGGAACAAGAACCCCAACCAACGGAAGAACAACAACCAAAAACTGAGAACAACAGCAGCGTTGAGGAGGACATCAAGGAAAATGGCACTGGGGACGCCGCTGCCGCCAACGCCGCTTCTTCGCCGGCACCTCAACAAACGGAAAACAACGATAACGATGCACAAAAACCAAAAGAAATGAGAGCCGTTGTTCTTATGAGCTTTGGTGGATTAAAATCTGTTAAAATTAT…	no					13.0455	-1.79431	-1.37136	3	1012	Non-Horn
contig_312	GGTGATAACTTGTACGAAGTTGACATTCGTGCACGTGAGTTTTTGTAAAAAATATTTTTGTTACAAACTGCCGCTACAATGACGGATGTACAACAAACGGAACAGCAAACCCCCGTATCTTCCGAAACGGAAAACACTTCACCCGTAAAAAACAAAGCTGCCGGCGGTGGTTCCTCCTCCGATTCGTCGACGAAGAAAAAGAAAAGCCAACGATCAAAAGCCACCCATCCACCCACATCCGAAATGGTGAATAACGCGATTAAGACCCTTAAGGAACGCAACGGTTCGTCGCTTCAAGCTATTAAAAAGTACATGACTTCTAATTACAAAGTTGACGCTGAGAAGATGGCTCCGTTTATTAAGAAATTCCTGAAGACCGCCATCGCTGCAGGCGGTATT…	no					10.5437	-0.947015	-0.145096	4	715	Non-Horn
contig_313	TGGCCGGGGGATGAAATTCGCTCGTGCTCAGTGTGTGTTGGGTTCTTGCACCGTTCCGCCACACAATCGGCTCTACTTTGCATGCGTTTAAGGAACAGGGTGTGACCGTGCTACACGTTTTAGAAGTCCCCTTTTTTTTCTACGACGGCGAGGACCCAAATCTCGTTGCTTTTTCCTCAGTTTACTGATTGCAGTTAGAAACTATCATTCTTCAAGATGCCAAAACCTATGAATGTTCGTGTAACCACGATGGACGCGGAACTTGAATTCGCGATCCAACATACAACGACGGGAAAACAACTGTTCGATCAAGTTGTAAAAACGATAGGGCTAAGAGAAGTCTGGTTCTTTGGGTTACAGTACACGGATTCGAAGGGCGATTTGACCTGGATCAAGCTT…	no					10.6464	-0.522486	-0.966083	4	831	Non-Horn
contig_314	GATTCCAGATGATTCTATAAACCGAGACGTACAGAAAAGCGAACCTTACGTGTTCTAAAATACGCGTTCGTAAGTTATCGCGAATGTTGCAGTGGTTCTGATAATTTCGCTCGATTTAGCGGAAATTGACCTTATAAAAAAAGAAAAGTTGGAGGAGAGATACAATTGGATCTTTTTCTTACCAAAAATATGTCATATCCAAATTCGCCATTTAGTGGTTTTCCGTTCGAAGACGATTTTGGTGATAGAAATTTTCGTTCCCAACTTGACGATATCGCACAGCGTCACCCGGAATTTGCGCAACATTTAAATTTCGATCGGTTTCCGAGTCAAGGACGCCGTAGAAGGGGCTCCGACGAGCGGACTCAACCCCCGCCGGAGAATCGCCGATTTGAGCGC…	no					9.95385	-2.9726	-1.91276	3	734	Non-Horn
contig_315	AGCAGTGGTATCAACGCAGAGTGGCCATTACGCCCGGGGAGTTTCAGTTCGATTTTTTTAAACAGCAGGCGCGAGGCAGGTTTCTCGCAATTTTTGGAAAACCGATTCAGTTTTAGTTAGTTTGTAACCGTCGATCTCAACGTTTGTGCCCCATTTTCCTTTGGTATTGATAATTCAATCAAAATGGTTATCTGTTTCACCTGCAATAAAAGAATCGAAGGACAGGTTTTGACAGCTTTAGATAAAACCTACCACCCCGAACATTTCGTTTGCGAGAAATGTAAAAA	no					9.72908	-2.03776	-0.919736	4	287	Non-Horn
contig_316	GGATGCATTCTGGGAGCCCGAGATGGGCACCATATTTTTCAGTGCCTATTTTAACGCGAGTGAAATCAAACAGAGTGTGGAGGGAAAGTGATCGTAACGAAGTGTGTTGGTGGTTTTTCCGTAAGAAAACGTGCGCGTCCGTTCGGAAAATGAGTAACGGGAACCGTCCGTGTCCGCGTTCCGTCTAAATTGGGCGCGCAGGTGTGTTGGAAAAAAGGGGTTAACCAACGACGTCCCGAAAACGAATTTTTATGATAACCGAAAAAAGTGTGAAACCGTCGCCGTTGTCGACGATACGCGAGTGTAATGCTAGTTTTTCAACGGGGTTCCACCAAACGAGCAAGTAATACGAGATGCAGAAGTGTTGGACAGTGTTAATTGTCGGCTCGTCCAGAGAGC…	no					8.28909	-1.7781	-0.686146	4	676	Non-Horn
contig_317	GTACGTTCTAACGACCCGACGCGTTGCAATATGTGCTGAAGTGAGTGCTGTTAGGGTTTCGCTGCGTATTTTAGAGGTTTATTTTACGTTTTTCAACGGAAGTATAGAAGTGCAATTGTGTGTGCTGAATCCTCTAACCGTCGCTAGCGTTTCCCAGATTTTTGTGCAGGCGTTGGTCAGTTTTCTCCCGTCGTCGTTTCGAGTGCTAAAGTGAGTGCTGATATATACGGAACGGCGGCGTTAGAGGTCTTCTTTTAGAATTTGCTAAAATGTACGTTCTAGCCGACCCGACACGTTGTATTAAGTGCTAATGTGAGTGCTGCTCGGGTTTCGTTGCGTTATTTTAGAGGTTTATTTTACGTTTTTCAACGGAAATATAGAAGTACAAACCTGTGTGTG…	no					10.4137	-1.21096	-1.89718	3	812	Non-Horn
contig_318	GAGAATGATCACACACACGAGTTATCCCTTCGAATTTAGCTGTGTTGAGAAGCCTTTCGAAGTGTATACAGGGTCAAATGTAAAATTGAGATACTTTTTACGAGTCACCATTATACGAAGACTCGCCGATTTAGTTAAAGAAATGGATGTGGCCGTGCACACTTTATCGAGTTACCCCGAGATGAATAACCCCATTAAAATGGAAGTGGGGATCGAGGATTGTCTTCACATTGAATTCGAGTACAACAAATCCAAATATCATTTAAAAGACGTTATTGTAGGAAAAATTTACTTCCTCTTGGCACGCATTAAAATAAAACACATGGAAATAGCGATCATTAAACGAGAAACCACCGGTTCAGGTCCAAACATGTTTACAGAAAACGAAACGATCGCTAA…	no					9.10234	-2.93552	-2.75637	0	716	Non-Horn
contig_320	CACACGGTTGCCGAAGCACTTAAGAATAAAAAAGTTAACGTCGCGATTCAACAAGAAATTGGTTCGAAACCACCCTCAGTACCTGATAGGGTTGCACCTCCGCCTCCGGTTTCATCGAAAGTGCAACAAATCAAAGAGAACTTTGCCGCGAATCCAATCGCGAAGTCTCAATCTTATTGTTCAGTGAGCATTAACTTGAATCTTTCGAAACCTACTTTGGAACGGTCGATATCCCACGAACAGAAGAAAACAAGAACTGTTATTTACGAGTCGAACCCTCAAAAGAAACCACCAAACGTAACCAGGAAAGAAAGTTTGAAAGAAAAAGACAAAAATTGGAACGAAGTTTTGAATGACAGAAATCACGTGAATACTCTCATAGATGAGATGTTCGCTGAA…	no					9.30503	-1.75196	-3.11427	4	761	Non-Horn
contig_323	GGGAAATGCGCCAACAATTTAGAAGGGGGGAGAAACCTGTTTTTAAGAGGAAATCCGAGAAAAAATTGGACGGTTTAGTGCAGAAATATGAAGATTTGAAGAAGAATAATAAATTGCAGAAACACCTTGAGAAGAAAGCTAAACAATTAGTTTCTAAAGAGAAAAAGAGAGGTTATTTGTAATGTTAATTGAAATAAAATAAGTTTAAATTT	no					8.79152	-2.46239	-2.42874	4	212	Non-Horn
contig_326	ACTCCCGGCTTTTTGACAGAAACCGAAATAATTTCGCTATCCATCATTTTTACATTTGTGTATCAATAAATATTGAAGAGGATGGCGGTGAACGTTTATTCAACGAATGTAACAACAGAAAACCTTTCGCGGCATGACATGCTCTCTTGGGTCAATGATTGTCTCCAAAGTAGCTTTGGAAAAATCGAGGAATTATGTACAGGGGCCGCTTACTGTCAATTCATGGATATGCTCTTTCCTGGATCTGTTCCACTCAAACGAGTCAAATTTAAGACAAACCTCGAACATGAATACATACAAAACTTTAAGGTGCTTCAAGCTGGATTTAAAAAAATGAGTGTGGATAAGATTGTGCCCATCGATAGGCTGGTTAAGGGCCGTTTCCAGGATAATTTCGAG…	no					11.715	-2.01724	-1.96758	3	1088	Non-Horn
contig_328	AGCGTCGAGTGGAGACTCCCCCTCATCCCTACGCTAACCAATCAACGCAACAACCTCAACTAGCGCGAGTGTCGGAACCGAGCTCTTTAATAGCGAACGCGGCAACGACAATTACGACGGTGGTGAACGCGGCTGCCCTAAGGACGACGCCTACATCGATGATGCAAGGGCAACCGGTACCCATGGAATCTCTTCCGTCGGATGTGAGTGTGATCTCAATTGTTAGTGAGAAATCTCCCGGGGCACGGGATGCTTGTGAAGTGGTGGTTAGTCCCACAGTTGTGCAAAACATTACCCCTCCGCCCTCGACTACACCCGTTGACGTGGCTTTGAACAGTTGTGCGTCCCCCATTAAAGTTGTGGAGATAGTGAACCCCGACTCCGAGAAGTCTAATAGTC…	no					9.5875	-1.27585	-0.975606	4	466	Non-Horn
contig_332	TCGGCATTACGGCACGGGGATATCTTTATAAATTACACAACATAATCAACAAAATGTTATTGAAATATCTTCTTATTTCTGGCTTTATCTCCATTGTCGAGCCTACAGCTTTAAAAAAGTTAAACACGATTGACGAAATTTTCACCACCTACAAATCAGATATCACTGATATTAAGAACTCTTTGCAAGTCTTGATGGAAGAAAATTCTCAAATCGAAAAAAAATCTTGCTTTGGCAAATTCAAAATTGTCGTACACAAAAGAAGAAACTGATAATCTGATTACTTCGGTAGATTTTACTATTCTTGGAATAAGTTTTAACTCGACCTCTACACACAATTGTGAAGAAATTGGGTTGTACAACGAATTACAAGATACCACAATGAATAATGTTACTAAA…	no					8.23909	-1.92158	-1.2075	0	755	Non-Horn
contig_333	GAGTCTTCGTCCGGCCGTGCGCTCCGACGCGTCGCCCCCCAATACAATATCTAAAAAAAACAGTATATAAACCAATTAAAAAATAAATAAATAAATCAATCGAGTGAGATATATAAAACTGTTTTTGAAGAAAAAATTAAATTGTGTGGATTTCTTTAACGAATTGGGATATTTTTAAATGGCTTTCTTGCGTTCGGCCCTCCGCCTCGGAGCCCATCACGGTGACCGGTTCGTTTGTAGCCGTTTCGGCGCCTCCTCCACAACGGCCTCCACATTCGATCACCATAGACGCCACAAATCGACCGCCGCCGTTCTTCAACCATCCCAAACGTCATCGTCGTCACCGAAAGATCCCCTCGATATCACATTCGAAGATGCTAAAGCGGCCTTCAAGAGCAA…	no					9.44561	-2.13094	-1.45361	3	735	Non-Horn
contig_335	GGATATGAAAAAAGTGAGGTTAATTCGGGATTCTTTTACAAAACCGCCGAAGAACGGGAAAAATTAGCTGACGCTGAACGTGAATTTATCGATCAAAGAGTAAAAAAAGTTATTGAATTAAAACGCAAATTATGTAATGGAACGGATAAAGGTTTCGTTGTTATCAATCAAAAAGGAATTGACCCAATGAGTTTAGACATGTTAGCCAAAGAGGGAATCATGGCATTGCGCCGTGCTAAACGTCGTAATATGGAACGTTTAGCTTTAGCTTGTGGGGGAACTGCAATGAACCATTTCGATGATATGAATGAGTCTCATTTGGGTTATGCCGGGCTTGTGTATGAGCATGTTCTTGGTGAAACTAAATACACATTTGTGGAAGACTGTAAAACACCTCAG…	no					11.1261	-2.17819	-2.02082	3	779	Non-Horn
contig_336	GATAGTTCAAGTCGAATAACCAAACCGACACACAGACCTACAACAAAATGTTCAAATTGGTGGTGTTGTCAGCATGTCTGGCTCTTGCCTGTGGTGCCCCTAGCTTGGTGCATCACGCCCCAGTAGCCGTTGCATATTCAACCCCAATTGTTAAATCAACCGTAATCGAATCAGTTCCATCTTCAATTAGCCACCACAGCAGTTCGGTTGTTCATGGTGCCGCTATCGCCACTCCAGTCATCACTCCAGTCGTCAAAGCTGTAGAAACTGTGGTACCAATCGCGAAAACTGAAGTAGTTGGCAGTGTGTCTTCAATCAGCCACCACAGCAGCTCTGTGATTCACGGAGCCGCCGTAGCAACCCCAGTTGTTGCCGAAGTTAAAGCTGCTCCAGTTGTTG…	no					13.988	-0.940193	-0.827736	4	720	Non-Horn
contig_338	GGAAAAGATCACCCCCGTGACATGAAACGAGAAGTTTCCTACGAAAAAGGCGAAAAGGATATGGATAAAGAACCCGAGAAGAAAATGTTTATTGAGGCCCCTCTGCCAAAAGTCAACCCGTGGTTGAACAAAAATGCTGCACTTGTGGTGGCAAAACGTACTGTACAAACACAAAAATCAGAACCAATCCCCAATGGACCCACAAAGTCCAAAGATTCTAACAATAAGAAGAAACAACAAAAGGTTAGTGATTTCGCATATGGCGGCGATTGGCCCACGCTCGGCGACCACTCCACAGAGCGTAAATCGCCTGTTAATCAAGTGGTGCCAGATCCTCCTCAAAGCAGCTCAAAGCAATCCTCTTCTAATGATGGAGACACCACCGATCCGGCGGAACAA…	no					9.27059	-0.878525	-1.21793	4	1015	Non-Horn
contig_343	GACTACTGCCCAAACATTGACGTGTTCTTTCATAAATTTCACAATTTCAACGATTTATTAGCCATTTAGTAACTATTAGTGTAGCTTAAAGGATTTATTTGAATCTACGATCAATTAAAAGACTTCAACAAATAAATCTCACTCAACAACCTAATTTATTTATAAATAAATATGTTATTAATCTCTTTTTTTATCTATTGATTAAACCACATTGAAGCAACCTTCAGTGAAGCATTAACAATGCCTTCATTATCA	no					11.3887	-2.30286	-2.69422	0	255	Non-Horn
contig_347	GAGTCTACGTACAGACGTTGCAAGCTTTCGATTCAAAGAAAAGTATCAAGTGCCCCCCCTACTACTTTCGGCCAACTATTTCTCAGCAGCAGCACCTAGCCCGGCAACCCAACCCCAAGGGAGAGCGAGCCACCCATCGTTGAGCGAACTTTGCGTAGAGCCGACGACGACTCCTCCTCAGTGATATATAAAGACTCAGTTTCCGATTTTGGCCACAAGTAGTTCACGTCGTCGTTCCATTCGGTTCACCACTCTCTCTCGCAGTCCGCATTAGGCAAGAAGAAGAAGCAGAAGAAGAGATGGATCAGGCAGCAGATACAACCGCCACAACTCCATCCGGAGATGCTCCAAAAGAAGTTGAAAAGAAACCGGTAGAAGAATCTGCCGCTCCTGCTGCGG…	no					12.1193	-1.74201	-1.47077	4	1018	Non-Horn
contig_349	GATCGACCTTTACAAAAAAAAAATATTAAAAGAAAAATGCTACTGAGCGGCAACGTTTACGTTCGGCGGTTCGCTTAAGCAGCCCCCCTACATCATCATAACACGCACACGTTCCGCGTTCGTTGTTGTGCCGGAGGAGAAGAAGAAGAAGCACAAGAAGAGATGGCGAATATTTTCGTGAAATGGTGGAAAAATAAGTTTTTAAACAGCTACAAACAGTTCGCAGGTGAGTTGGAGTTCTAAAATTAAACAAATGTGTGCGTTATATATCATATATATAAATTCGATTCTTTGTCTATTTAGATGCTAGTTATGGGAAAGTTTCCGACACGGAGGAGCTCCTTGGGGCCGTACGCCACGATAGCGACATCGACGACCAATTACGAGTCTCCTGTACTA…	no					9.10297	-1.88061	-1.91903	4	944	Non-Horn
contig_352	GAGACAGTTTGTCCGCGTTTTGGGGCCGTTCTGGGGCGCGAAGACACGTTCTAGGGCTTGAAAAATCGTGGTCGCGTTTAACCGCAGACTACCATTCGAGTTAACTCATTTGCCGACCAATCTGCTTTGTAGTACTTCTTTTGAACAACGTTGTGTTCGCTGGTGTTCTCCGAGGAGGCCATCTTTGCGATCCCCTATCAAAGGTCCTTCGCTCGTGCGGCGTTTCATTGTCCTGTCCTCCTTGTGTCCCCATTTTTTCGACTACCATACAAGTTTTGGCCGCAAACTCACGATTAAATGGCTTTAAAGCGAATTAATAAGGAATTACAAGATCTCGGTAGAGATCCTCCAGCACAGTGTTCGGCAGGTCCGGTTGGAGATGATCTTTTTCATTGGCAA…	no					12.9703	-2.09321	-1.70985	3	875	Non-Horn
contig_353	GACTCGCAAAGTGTTACTCAACGTTTTTGTTGCATTTCAAAGTTTTGAATTTGATTATAATACTTCGACAATGACGGACGTAGAATCGCAAGAACAAAACAACTTGGCCTCAACCGCAGAAGATGCTTCGCCTGTAAAGGTTAAAGCTGAAACGGCGACGAAGAAGAAAAGCCCGCGATCAAAAGCGACTCATCCACCCACATCTGAAATGGTTAATTCCGCGATTAAAAGCCTCAAAGAACGCGGAGGATCATCAGTTCAAGCTATTAAGAAGTATATGGC	no					9.97236	-1.20807	-0.283736	3	282	Non-Horn
contig_354	GAGTCGGCGTACGTCTCAGTACTCGTTCATATGTGTGTTCGGGGTGACCAGCCATCTTGTTCAATCTAAAAGTATGCGTTTTTGAGGTGTGTGAGTGGTTTTGGACGGTTTTATAAGTGGCCAGGGTGATTATACGGGTAATGTGAACAGTTATAAATAGAAGGTAGTGGGGACCATGTCGTCTGCCATGCGCTCCACCCTGCAGACGGTTCCCGAAAGTCTCGAAGTGACCCGCGGAACGGACTCGAGTGGTAGCGCCAAAACACCTGTAAAACTTACTTCGGATACGTCGAAACAACGTTCTACCTTTAGCTATCACAACACGTCGTCCACGAACAAGAGCGGAAACGATGGAACGGTGGAGTCCAGTATCAGAATTAATCAGTCAACCAGGAATAG…	no					9.44738	-1.72767	-1.7014	3	704	Non-Horn
contig_358	GGTTTTTTCGGGAGATATCACGTTGATTTGGGGCCCCCGGAGGCCCGATTGCGCACGTTACGGACGCTGGTGATGTTCCGGAAGCGATTCTCGGGCGGTTGAAGCTGGTTCGACGGCGCCTCGCGGCCCCAACATTCACCGACTCGGACGGATCGACGGCGTCACCGACGAAGGTTAACTCTAACTTCATCTCTCGTCGTCGTCGTCAGTTTTCTTAATTTTTTTTAGATACGACTTAAATTACGCAAAATGTTCGATCCAAATTCGATGACCACCCAACAAAATCAAATATACACCCAACAACCGCAAGATAAGCCGGATAAATCGCAGGATTTAACCCCAAAAACGCAGCAACAACAGCAACAGGTGCAACAACAATCGCAACAAACGCAACAATTT…	no					9.78783	-2.78866	-2.05994	2	1264	Non-Horn
contig_359	GGGTGCGATGTCCGATATAGGCAGCGGGGATGAAGGTTCGAGCTCGCAGAGTGAGTACGGTCGTACATCGTCACGTCCCCGTTAACGTTGACGTGCGTTAGAAAGCCCCCGTGGCCCCAAAAATCCACCGAACGCCGACGAAATCGCCGTTTCGGTTTTGACGTTTCGTACGCATACACAACACCTTCTTGTTCTTAAAGCAAGATGGCCGCCGCCGATGAATTCGACATCGAAATTTTTCGTCAATTTTCACTTGGTTTTCATTTAATCGGACGCGCACGCGATAACCGATCGGTTTCGAATTGAACGTTTTTCCATACGGGATCGGAAATCGTTTAAATCGCATTTAAAATTAAAAAGTTTTGTTGTTGTTGTTTGACGTTTACTTAGAGGTAACTT…	no					11.1147	-1.71565	-2.58292	3	877	Non-Horn
contig_361	GATTGACAGGTGATCGTATGGTTCGGAACCGCACTAAATAAATTAAAAATCTTATCTTCTCGAAATCAAGCATCTGAAATTCTTGGTTACTCGTAATCTGATTGAATAAACGAGTTCCGAGTATTTTTCGAGAGTAATTTAGTTGTGTTATCGTTTTAAAATCGAATAATATGTAAATAAAATGGAGCCGAGAAGTGGCCGAACTGCCATGACAGATTTAGAGCGTCCATCCAGTTTTGGGACCCGTAGAAAAGTTTTCGTACGATGCGAGTTCCCTAAGGACGCATTCCCGGAAAGTCGGTGATGAGGCGGTCCGTTTAAGTGCCCGGATTCATTTCGGCCGGTATTCGTCGCGAAAGTAATTCAGTTTAGTACGGTATTTCGTGTTTGACGTGTGCT…	no					8.23117	-2.22368	-2.58834	2	954	Non-Horn
contig_363	TATATATATTATTAGTATATTATTTTCACCCTCTACCCTCTTCCTCCATTTCCATACCCTTGGCTCCTCGGCCCAATCATCCCCTCATCCTTCCCTTTGTCTCCTTAACCCCACAACCATTCTCATCCATCGGTTCCCCTCTCCTAAGATCTGCCCTCGGTTCAACTCCTCCTCCCTCAACTCACTGCACCCATTCAACATATGTTCCTGTTGTATACGGTGTTAGGTAGATGGCGTTAGTAGTAAGGTCGATAAAGACGATACTGTAAAAAGAATAGTAAGATGTAATGGACGCTGAATGATGCTTAATAAAAAGTTAGATAGTATAATAAAACGGTAGTGTTTTAATTAATGAACATAAGACAGTTCCAACGTTTCCCATTCCTCCCTGCATAGCCT…	no					8.2048	-1.45686	-0.655675	3	937	Non-Horn
contig_365	AAACGTTAGCGTTACGTTCGTTTTAATACTAATTTTGATAACTTGAGTAAGCAATAACCGCTTTAAAATTGACGATCGGCAAAAATAATAAAATGATTCAACACATAAACTACAGGGTTAGAATCACCCTGCAAGATTCCCGTACTTTCATCGGGACCTTTAAAGCCTTCGATAAACACATGAATATGATCTTGGGCGATTGCGAGGAATTTCGTAAAATCAAACCGAAAAATTCTAAAGTTGAACGTGAAGAAAAACGCGTTTTGGGATTTGTATTATTAAGAGGGGAAAGCATTGTTTCTCTTACTGTGGAAGGGCCCCCTCCCCCAGAAGAAGGACTCCCGCGGGTTCCTATTCCAGGAGCAGCTCCTGGACCTGGTATTGGGAGAGCAGCTGGGC…	no					9.56958	-2.39545	-1.33765	4	790	Non-Horn
contig_366	GGTCACACGTCAATCTGTTTGCAAACTTGCGCCAGCTCATCGGTGTCAAACGAATTGATATGTTGTAAATTTAATTTCAACGTGCGTTCCTCTAGATTTTTAATATAGTTAATCTAATTTACTTAAAAAAATGTATACGTGGTGGTTGTGTTCGGTGTTACTCGCGCACCTATTAACGGTGCAGGGAATAATGTGGAATCCAGAGCCGAACACTAATAAGTGTTTGAAAGAAAAACTTCATCAAAACGTGCCTGT	no					10.6114	-1.80838	-2.29908	3	255	Non-Horn
contig_369	GCCGGGGACGAACGCTTGTTAGCTTCGAAGGTATCGTGCTGATAACTTTATTAAAAAAAGTTTTTAATCAAATCCATTTTTTGTACAAATCCTGCTTCTCCAATGACGACTTACTTCAGTTATCCAGATCAAGCTCTCCAAGATGAGCTTCGCCGCATTGCAACGGCGATTACAGCCCCTGGAAAGGGTATTTTAGCTGCTGATGAATCTGTGGGAACCATGGGGAAGCGCCTCCAAGGAATTGGGTTAGAAAAC	no					12.0857	-2.26996	-2.84376	4	255	Non-Horn
contig_371	GGAGAAGAAATCCGTAAGCGATTCATTTCGTTTCATTCGGTCGGATGGTTAATGTTAAACGCGTCAATGTCACCGTTATTTTCGCGTAAAATATTTTCGACGTGTTTATCGTCCGACGGAACCTCGAAACAATCAAAAACCCAAAGAAAAACTTTTTTTTACTCTGAATGGTAAATGGTAAAACCAAGAACCGATCAGCAATTGTTTTGTGTTTAGTACTCGAGTTGTGCGTAGGTGTTTAACGGCGTTTTATTTTAAAGGTTATGTTATTTATTGTCTTTTAGAAATTATTAAAAAAGAAATCTAATAACATGAAATAAGTGTATGAAATACCGTTTTCGGTTGAGTTAATTATTAATTTTTCCGTACGAGATGGATGGGATTTGCGAAGAACAAATT…	no					8.16973	-1.48658	-1.34954	3	727	Non-Horn
contig_372	GGTAATGAACGTCAAATAACGAATTGGAAAATGGCGGAGCAAGAACTGAACGTCGACAACTTAATTCAACGATTATTAGAAGTTAGAGGATGTCGCCCTGGCAAATCTGTACAGATGACAGAGGCGGAGGTGCGAGGCCTATGTTTGAAATCACGTGAAATATTCTTGCAACAGCCTATTCTACTGGAATTGGAAGCTCCATTAAAAATTTGCGGCGATATTCACGGACAGTATACAGACTTATTAAGATTATTTGAGTATGGAGGCTTTCCCCCGGAAGCAAATTACCTATTTTTGGGCGATTACGTCGACCGCGGCAAACAATCATTAGAAACAATCTGCTTGCTACTTGCTTACAAGATTAAATACCCAGAGAATTTCTTCTTACTGCGCGGAAAC…	no					10.5994	-1.30334	-1.9364	3	1184	Non-Horn
contig_374	TTCTTCATACGCTGATAATCATAATCATCGGAACCCCTCGGAAAATTCAGCAGGGGACGTTCATTCGTTACCGTTGGATGGAGATGATAGGAGCAACCCGATTCAACGAAAAACTCACGACGAAGATGTTGAAGTTGAAGAAGAACCGGAAGAATCTAAATGGCAAGATCGAATATCGTCAGGTTTCGATCGTTTGGTGGCTTTTGCTTCAACCGAATTAGATAAGCGTAGAAGGTCAACGGAGGGCAACGAAAGTTGTAATACGTCGCCGGATTCCGGAATCGGCCTTGATATACCAACAGCCCCATCGACGTCTATGCCAGCCACAAAACAAATGTTAAAATTAAATCCAAATGCCAAACCAACGTTATTTAAGGTGCCTTCAAATAAATGTAAGAG…	no					8.28967	-2.49918	-2.02499	1	935	Non-Horn
contig_376	GCTTTTACAAGATGGCACCGCCAAAGCCAAAGTCAGCGGATAAACCCGCGGCGAAAAAAGAAGAAAAGAAGAAGACGGCCCCAGCCTCTGTGGCTGGTGGTTCTAGTAAAGCGGCTCCTGCTCCAAAAGCAGCAGCTACAAAACCTGCATCAGCACCAGCTGCTGCAGCTCCAAAACCAGCCGCGGCTGCTCCTAAACAAGCCGAAAAGAAAGCAGCCAAACCGGCAGAGAAAAAACCAGCGACTGCTGCAAAACCAGCAGCGAAAAATGTAGCAAAATCAACAACTGCTAAGCCGAAGGTTGCCGCAGGGAAACCTTCAGCGAAAAGCGTTAAAAAGCCAGCATCGAAAGTTACTGCGAAACCGAAGGCTCCTGTTAAATCTGTTTTATCTAAACCTA…	no					12.7877	-2.599	-1.94138	4	733	Non-Horn
contig_379	GACTACCGAAAACACAATTAAAGTATATTCAAGACTTATTCAACTAGAATTTACACGAAGAAGGTTTTACAAAATATTTTCTAATCGTTTTGAGTTTCTAAAGCTTCGGAATATTCATGATTTATCGCGAATAATTTTGTTGTGTTGCAAATAGCTAGAGCTAAATTATACATAAGTAAAATGGATTTTGCTAAAAAACAGCTAGAGAAATACGGCTGGACTGAAGGTCAAGGATTAGGAAAATCCAACAACGGTACTTCAACTCCATTAAAACCCAAATTGAAATTTGATAATGCTGGAATTGGTCATAGTCATGCAAAAGATTTAGTCAATGATTGGTGGACAAATGTTTATAAAAGTGCTTCAGATAACATAGAGGTCACTAATGATAATAATGAT…	no					8.77993	-2.2897	-2.44952	3	1185	Non-Horn
contig_382	GCTTCTTATTTGGACCCGAAAGCATCGTTTATCGTTGCATGGTCCGTCCGTGATTATTATTTAAAAATCAAAGAAAATGGGATTCGTAAGAGTAGTAAAGAATAAACAATACTTCAAGCGATTCCAAGTAAAATTCAAGAGGCGTCGTGAAGGTAAAACTGACTACTATGCTAGAAAACGCCTAATTGTTCAAGATAAGAACAAATACAACACCCCTAAGTATCGTTTGATCGTTAGACTTTCAAACAAGGATATCACCTGCCAAATCGCGTACTCCCGCATTGAGGGCGATAAAATCGTTTGC	no					12.6564	-1.87813	-1.93776	3	304	Non-Horn
contig_385	GAGACCGACGACCAGCAGCAGCCTTGCCTCGATCAGTTTTCTTGCAAGGCTCACCTGTGAAGGTATATCTCAGTTAGTCTCGTCGTCTCTCTGAGTCGGTCGCGTGCAGTGTGTTTACCAGATCCTTTCGCGGGTTCGTTTTTGTCGATCGACCGCTATCGACGTCCAACGGATTGATACCAACTTTATTTTCTCGATCCTTGTTATTTTTTTTCTTTTTTTTCTCTTTCTTTACTCCGTTCTCTCTACTACTACAAACTCCACGGTGACGACGACTACGATTCGTTCTCGCGGTAGTTTTTCTTCGTTATCCTTTTACGCCTACCATCGACGGCGCTAACGGAGACCTACCATCGGTTAATTCCGCGAGAATAACAGTGCCAGAGAGTTGTCCACCGA…	no					9.10809	-1.05789	-1.2526	4	739	Non-Horn
contig_388	GACTCCAAGAGTACCGTTGCCGAGGTTGCCCGCAGCAGATGCTCCGGTATCCGAAGAAACAGCTGACTTCTTCTTCGTCTTTTATCGCGTTCTTGCTTTCGTCACGATTTTTCATAACGCGAGTTATTCAGTGTGCGCAAACTAGGACGTAATTATTATTATTGATTCGACGTGAATTAGATATTTTGATAGTTTGTTTTTCAAATCAATGAATAGTGATGAACAAGTTTTGCAGTTTTGGGATGAGCGAAAAGCTCAAAGAGAACCAGACGATATTGATGTTGCCTGATATTTCTATATCGCAGGGCTCTGACCCGCGCATAGCGACATGCCGTGCGAAACTCCAGAACAAACGTTCGAAACTCAACCAGGAAATCAACAAGGAACTACGCCTTAGAG…	no					7.89405	-1.91632	-0.924101	4	847	Non-Horn
contig_39	GAGTCTCTATATTATCACTGTCATTGAGATTACTTTCCTCATTCTTATTTTATATTTTATTGAAGTAAAATGGAAAATACTGGAAAATTATTCGGAAAAACTTTATTTATAACCGGCGCAAGTCGCGGAATTGGTTTAGCAATCGCGTTAAAAGCCGCAAAAGATGGTGCAAACATAGTTTTAGCTGCAAAAACGGCCGAACCTCATCCGAAACTTCCAGGAACTATTTACACAGCAGCCGCGGAAATTGAAAGA	no					10.1427	-1.5484	-2.22845	4	255	Non-Horn
contig_390	GAGCTCCGCGGGGATGTTGAAAAATCAAAAAGGAAGGTTGAGGGTGACTTAAAACTCACTCAAGAAGCCGTCGCTGATTTGGAACGTAACAAAAAGGAGTTGGAACAAACCATCCAACGCAAAGACAAGGAAATCTCCTCGCTCACCACCAAATTAGAAGACGAACAATCCGTCGTTGGTAAATTACAAAAACAAATTAAGGAATTGCAAGCGCGTATTGAGGAATTAGAGGAGGAAGTCGAAGCCGAGCGTCAAGCTCGCGCTAAGGCTGAGAAGCAACGTGCCGATTTAGCGAGGGAATTGGAAGAGTTGGGTGAGCGTTTGGAAGAGGCCGGAGGTGCAACTTCCGCACAAATCGAACTCAACAAAAAACGCGAAGCCGAACTTGCCAAACTTAGA…	no					10.0622	-1.46461	-1.29755	4	863	Non-Horn
contig_392	GCACTTTTGACACAACCAGCTGTGCGTTTAAGACGTGGCTTCTCGGTTAGTGTAATCGTTTTTCTGTTTTTACGTAGTATTTCTTCTTTCGATTTCTTCGATTAACAACGCTAATTAGAAACAGAAACGATGGCCCCAAAACAAAGAATGCGTATCGCCAACGAAAAAGCCATGAAGAACGTTGTGCTTAGAGGAAATGTACCCAAGTCGCAGAAACCAGAAAAGGATAATTATCCCGTCGGACCATGGTTGTTGGCGTTATTCATATTCGTGGTTTGTGGTTCAGCAATATTCCAGATAATTCAGTCGATCCGTATGGCATAATAATGAAGACTAAAACGAAGGAGAAACAACCCCCCTCAATAAGAACCAGATGTAATTTATTTTTGTTAACTCCTT…	no					10.9328	-2.1025	-1.91576	4	789	Non-Horn
contig_394	GGTATAGATAGACCCACCGCGTAACCAATTTACAACGCATATACGATTACCTCAAAACTTATTTCTTAACAACTTTTATAGTGTATCGCTTTTAATAAAATGTCGTAGTTAAAACACCATCTAAAAAAGATACAACCTTTTTTGCGTTCTAGATGTCTTTTCGGTTCATCTCTTTGGTGATACCAAATGTTAAAAGGTGTTAATTTTCGTTAATCCCAAGAACTTAACAAGTACGTAAAAATGTCTTCGGAATACACAGAGATGATGGCAGCGATTGCCATAGGAGTGCTTACGGCGATTTTTATCAGCGCTTTTGTAATATTAGTCGTTATATGTAGGCGACAACGAGTGTTTTATTATAAATCTACGTTTTGTGCCAGCCAAGAAGATTTTGCCAAG…	no					10.608	-2.26881	-1.29662	3	691	Non-Horn
contig_396	GATAATATAATGGTGCCAATGGTGGCCTACTTCATTTCATTGTAGGTCATTATTATTTGTTATGTTTTTTTTTTGAAAATCTGTATAGTGTGTTGCGAATGGATAGCGAATCCGAGGAAAAGAGACTTTCCATTTTAACATGAGAGGAAAACGTTGGAGATACGGTGTTAAAATAATGTCAACAAATGACTTCTAATACATGCAGAGTGGAATGGGTCGAAATAATCGAGCCCCGTACGGGGGAGCATATGTACG	no					9.62667	-1.06112	-2.03518	3	255	Non-Horn
contig_4	AAATATGGAGTGTTTTGTGAGGTTAATTTTATTTTTTCGATTAAAAATTATTAACTAATTACTTTTTATAGATGGGAGAAATTATGAAGATGGGTTGTAAAACTCGAAAAGAAGCGGCAATTACTTCTCATGTTTTCTTAGAATTATGTGAAGTTAAAAAATATTGGGATGTCGAGTACCATTTCAACGAAATTCTTTCTTCCATGTACATAACAGCAAAGAAAACTAAATCATCCAAAACATTAACATTTATTCCAATTTCCTCATTCGATGGTATATCAATCGAAGAAATGAAAAAATATCTTATTTTAGACCAAGAACATAAAAGTGTTCATCTTGCCATTGTCGATTCAGATTTAACATCTGTTTATTATCAAATAACCGATGGTATAGGAGATC…	no					9.63042	-0.94317	-1.57502	3	619	Non-Horn
contig_400	GAAATTTTGTATTCATACAACAGCTGATTGTCACAACAAATTATCAACAAGATTCATTGTTATAACTATGTCGGACAATTCAACCGTCGATTTAGAGAACGGGCATTATTCCAACGACTCAAATTCCCCAATTTCCTCCTCGGATATAGAGGATGATTCAGAAACGGGGGATAAAGGCGAATTTGACACAGCATTACCAACAACTCACAAATATTTGGGTAAGCTGGATAATGTTGGGGGTTACACATTATACGACGATGGCGAAATCATCCAAGCAATGCTGGCCATTCACACAAACACTTTGGTTTTTCCTGGGTTTACACTCCCTTTGGTAATTCGTGAATATGAAACGGATCACATCATGGATGATATCAAAAATGGATATATGTTTGCTTTGAT…	no					9.40649	-2.33915	-2.7631	3	738	Non-Horn
contig_401	CTTCTCCTGCTGCTGTACGAGTCTCGCGAAAAGATGAAAGTTTCCGTCGTGCTCTTGGTAACCTTCTTCGGGATCAGCTTTGCTGCGGATCAACACAAACGGGGATCCGAGGAATACAATTCAAGTACGGGAAAACCTGCATCTTCTTCAGCCCAAGAAACGACATCAACCCAAGATGGTGTTGACTTACACACATGAGCAACCTCAAGTCTCGACTCAACAACAGCAACAACAACACCATCCGATTCAATATTCCTCAGCAGCTGATGTTTCCAGTTTTAAATTTCAAAGTCCTTTGGTTACTTATTCAAACCTAGGAGTTTTGCAACAATCAATTGGAAAAGGAGCCGAACAACCATCATCAAGACAATTTCCTCATCAAACTGCCCAACAAACTTA…	no					9.29237	-1.27521	-0.623796	3	751	Non-Horn
contig_404	GGTCGCAGTCGGACCCGGTCGCTAGTGGAAGTAGGATGTCAAACAAAATGGGAAGATAGTTAAAACGTAAACGATTTGTGTTATACCAACTTGTGAGAGAGAGGAGAATATCGTACGATTTTTAATAACCCGCGTGAAGGAGGAAATAAGTGCTTTTTTACTGAAGAGAATAAAAATTCGAGATGGTGGAAAAGATAATCGAGGAGGCCGAGTGCTGCAACAACGGCTCAGGAGAAGGTAGACGTAGTGAAGAGTGCCAAAATGGTGGTGGTAGCGCTTCTGATAGCGGTGACCAAATGGATGCGGAAGCTCGCGAACGCGAAGTTGCCCGCCGAAAGGAAGAGGCGAAACGGAAGCGACGAAAGAAACGTCGTACCGGATCGTCGCTTGTCTCATCGT…	no					11.3589	-1.29132	-2.147	4	734	Non-Horn
contig_405	GATTGATCTGTCAAATATTAACCTTAAAATCACCATTCAAAACATTTCGAAATTACGTAATTTATAACCCTTTTTAAAAGGAAAAAATGGTAAAATCCTCCCCAACCGGGGGCGTAATGCCCATGGATCTCGCGGGTCGCCTCGCCCGCGAAAGAGAGCGTCTCCTGGGCATGACAGACGCCGAAAGAGCCTTCCGTAAGCAATACTTAAAAGATCAAGAATTAGCCCATGGAGAACCAAAATTCGTTCCGGAACTCTACAGGGAAACCGTAAACCCCATCCGTCGACTTTACCGTGCACCCTTAGATGCATTTCGTGTAATGATCACCCCGATTGTTGGCGCACAAAGGGCCCTTCATATTCGTTACTTTACCGGAAAATTCTTGATGATTACACTGT…	no					9.34045	-2.87347	-3.10972	0	646	Non-Horn
contig_406	TGATAACGCTGCGGAATGGTCTCATTTAGTTGCTAGTATTCCAATGTGTCTCTCAGAAGCTGTAGCTGGAATCAGTTTTTGTGGAGCAGATATAGGTGGATTTTTCCACAATCCCGATCAAGAATTATTACTGAGATGGTATCAAGCTGCTGCTTGGCTTCCATTTGTTAGAGCTCACGCTCATATTGATACTAAAAGACGAGAACCTTATTTATATAGTGAAGATGTTCAAAGGCGCATCAGATCCGCTTTAAGGCAAAGATATGCGCATATTCCGTTATGGTATACTCTATTTTGGGAACATTCAATTACTGGGGATCCGGTTATTAGACCGTTGGTTTATCATTATCCTAAAGATGTTAATGTTGTAGATATTGAAAGTCAATTATTAATTGGTAA…	no					11.4146	-1.64719	-2.02744	3	751	Non-Horn
contig_407	GGCCGGGGGAGTGTATAAAGTTGTTGCGATACGAACGGCGGTAGCCATTGTTCCAAAATTTGTCTATTTGTTTAATTTACAATAACGTGAAGGTGACTTTAGGGTAGTTTGACCGCATTAGTGGTATCGTGAAACTTCCTATTTTCTTGTGGACTTTAAGGCGACCGTCTCAACCGAAATAGAAATGAATCCCGAGTATGATTATTTATTTAAACTGTTGCTGATTGGGGATTCAGGAGTAGGAAAGTCATGTTT	no					12.0074	-1.91673	-2.77375	3	255	Non-Horn
contig_408	GAAAAGAAGCATCCCGAACCACATCAACACCAAGTCCAGTTATCGTAGTTAATAAAGAAAAAGAAATAATTAAAGTTGATGTAAAAGATGTTGAGAAGGGAGTTAATGAAGTTCAAAAAGAGGTTAATACAGAAATTAAAGAATTAAAAGAAGAATTTACCCCGTTGGCGATTGAGAAAGTTACTGAGGAGCTTAATATGACTTTGGAGAAGGAGAAGATCGAGGAGGAGAAGCTTGAAAAAGAAGGAATTAAAGAGAATGATTTGGTTAAGGAGGAGAAACATGATGGCGAGGTTAAAAATGATGGGAAAGAATGTGATGTTGAATTAAATAAAGCTGAATTAAAACAAGTTGAAACAAATCGAGTTGAATTAAAAGAAGTTGAATTAAAACAAGTTG…	no					8.14297	-1.72395	-1.4979	2	1298	Non-Horn
contig_409	GGGTGTGAAGATAGGTATTGAAGTTGCCGAACGACGGACGAAGTCTCTCATTAAAATTTATTTTAAATAATTGTGCTTACGTCCCGAAGGATCGGTTTAAATTAAGTTCTCAAGTCGCTTTAATAGTGTTCAAAGTGTTTAAAATCGTTAAAATGGCCGACAAAAAAGGAGTTACTGGTCCCGCTTCTCAAGGATACAGTTCAGCTCCACCACCGCAGGGTAACCCCCAAGTTCAAGCTCCTCAACCACCTTATGGCGTTGTACCTGGAATTCATGGTGCTGCCCCATATATGATACCTGGGCAAGCTCAAATCTATCCTCAAGGGCCTCCTCCGACATATGATCAAGCTCTAACTCATCCAGCTATTGTAGGACAACCCATTTATCCTCCAAGTGCTT…	no					10.9299	-1.32685	-1.97455	4	409	Non-Horn
contig_410	GGTTAATTTCCAGGGAACCATCACGTCATGATGAAAATTGGATTCATTTTGGTTGCATTCAGTGCTTTCTTCTTCAAAGGAGAGGCTTCGCCATCACGAACGGTTTGTTACTTCAGTAATTGGGCGATTTATCGCCCAGATGTCGGTAGATACACCCAAGATGATATCCCGATAGAGCTTTGCACCCACTTAATTTACTCGTTTATTGGGGTGGATGATAAATCTTGGTCTGTTTTGGTGATTGACCCTGAATTAGACACCGATCAAAACGGATTTAGGAATTTCACCGGGTTAAAACAAAAAAATCCTTCGCTTAAACTTCAAGTTGCCGTTGGGGGTTGGGCTGAGGGGGGCGAAAAATACTCGGCTATGGTTGCCCAAAAATCAAGAAGGGATTCT…	no					13.6504	-0.695413	-2.08213	3	1338	Non-Horn
contig_414	TTACCCTTCTTATCATCAACCCCCACATAGAGAGCCTCAAGCACCACCAAGTGACAGTCAACAGCCTCCAATGATGTCTTTCAAAGCATTCTTGGCCACTCAAGATGACAACATATCCGATAGTGAAGCAATCGAAAAGTATAATGATTACAAGTTGGAATTCCAAAGGCAACAACTCAACGAGTTCTTTGTAGCCCACAAAGATGATGAATGGTTCCGCCTGAAATACCATCCAGAGGATTCTGTTAAAAGAAAAGAAGAACAAATGGCTGCTTTGAAGAAACGAGTAACCGTCTTCATGGATCTCCTAAATTCCGAAAAATTGTCAACCATTTCAATAGACTATTCTCGTACAAATGATTTATTGAAAGTTTTGGATACAGTTGTGGTTAAATTGGA…	no					9.93223	-1.60401	-1.95591	1	1151	Non-Horn
contig_417	GTTATGAAATTCTAATATTAAACTAGGATTAGATACCCTATTATAAGGAATGTAAATATTTAATGTTAGGGGAGTAATAGTTATTGTCTTGAAATTTAAAGAATTTGGCGGTATTTTAGTCCTTTCAGAGGAACCTGTCCTGTAATTGATATTCCACGATTAATTTTACTTAATTTAATAGTTTATATATCGTCGTAGTTTGAATATCTTTAAAAAGAATGAATATTCATGATTTAAAATATAATAAAGGAAATCAGATCAAGGTGTAGCTTATAATTAAGGAGAGATGGGTTACAATAAATTTATTTAAATGGATATAGTATTTAAAATATTTATTGAAATTGGATTTGAAGGTAATTAATTTTATTTAAAATTAATGATTTTGGCTCTAAAATATGT…	no					8.92091	-1.88722	-0.54646	4	740	Non-Horn
contig_418	GAGTGACAGTTTGGTTTGTGCTTTTGCTACGTTCAGGTTGGATATGTAGATAGTGGAATGTTTTAGTAGTGTACAGGTGGAAATTCGACACGTCAAATTTGTAATAATCGTTTCCGTTCTAATTTTACCGCGTGAATAGTTTCGTTTTAATCCGATTCAATGGAAATGTGATTTTTTTAGTATTTATCCATTGATCGGTGGAAAATTTGTTCGGAAAAACGATCATAATTCATCATTCCTAAACGACATTACAAGTGTTGGAGACAAAATCAAACAGTCGTGGTAAACAAAACGCGATCGACAAGTGAATACCGACAGGTGGAGCCGATTATCGATAAAATTTAAATTCTATG	no					9.13432	-1.54533	-2.46264	3	353	Non-Horn
contig_420	GGTGGCAGCATGGCGGTGACGTTCATTTGACAGTTAAAAATTCGGTGATATATTTATAAAAATACATTTGTTTACTCTTGGCTTCAAAATCCAATTGTGTAAGGAAACGGGACGATGGGGGAACAACCCATTTTTAGCTGCAAGGCCCATGTCTTTCACATTGACCCAAAAACCAAACGATCATGGATGCCTGCCTCCAGCACTGCAGTCAATGTCTCCTTTTTCTTCGACTCCCAAAGAGGCTTGTATAGAATT	no					10.1509	-1.8821	-2.95348	2	255	Non-Horn
contig_421	GGGTAACAAATTGATGCGAGATAAGGCGATTTTACACTGTTGTGTTTTGCTAGTTTTCTAGACATTTCGAAGATTTATTTAATTAACTTTCGCTTAATGAGTTTTTAGTGTTGGTGCGGCTGTGGCTTAGCGTATTCATGTTACAAATTTGGACAACGTAAGTGTGCAGTAGATGTGGGAATATTATGAAGGCGAACTGACAAAAAATCTTTCACAGACATGGCTGCAAGTAGAAAATTACAAGGAGAGATCGACCGTTGTTTGAAAAAGGTTACCGAGGGCGTTGAAACTTTCCACGATATTTGGCAAAAGGTGCAGAATGCCACTAATGCTAACCAAAAGGAGAAATATGAGGCTGACCTTAAGAAGGAGATCAAGAAGCTTCAGAGGCTTCGTGAC…	no					9.37945	-2.21847	-2.22378	2	1037	Non-Horn
contig_422	CAAACCATTTTCGTAAACGTTCAAATCGTTCAAAACGTAAAGCCTCATATAGTTATATGGCATTTAGAATGATCGGAATTCTCTCAATCCAAGGCCATATCATGTAATCAACCATTCCAGGTTCAGATCCATTAAAAAAGTCACTTCCTCTCTTCAATAACTCATTTTCGTAAAATTCCAAAACCGGAACTGCTTTTTGGATTAGCTCTCCCGTTGATAATCCCTGCCTATTAAATAAGATGCTATAAAAAACTTTTATATGCAAATCCCCAAAGTTTCTTATAATCGCTTGATCTTTTAGTTTTAAGGTTTCATCTTTTGGATATAAAGGGGGATTTGGATAAGTTTCTTCTAAATAGTCGCAAATATTTAAACTTTCCGGTATTATTTTTGACCCTG…	no					12.274	-2.30381	-2.21641	3	1791	Non-Horn
contig_423	GGTTAAAGATTCATTGTGGAGTGCTTTTTGTGTATTTAAAATGTTATTAAAACACTGAGTTTATTTCTACACCAATCAACATCAAAATGCGAAATACACCAATTTTATTAATTAAAACAACTAAATCGACAACGATTAATTTGAAAGTTAATAACAATAAAAAAAAAAATTGTGCGTGTTTACAACGAATATAGAACTGTTAAACAATAATTTAATCGCTACGTTAATCTAAACAACAAAAAAGACAATAATTTTAAATTAATCATCAAGAACGTGCCCCAAGTAGATTTTTTTTAATTTTGTATTGTTGGCTCCCGTGTTTGTGAAGTGAGGGGATTAAGAGTGGAGGGACTTTTATATAAACGCGGACGTCCATTTTAAATTTTAGTGTGCTTTGTT…	no					10.2448	-1.42907	-1.68528	3	1076	Non-Horn
contig_425	GAGAGTGGTGAAGAGCGTTTCGCGGAGTGACACGCTCTCCTTGCTTGAAATTGTGGCTTTAAACGAAGAAAAAGTCGCGGATATCGCCGTTAACTTGTCGAAAAGTGCCGGAAAGTTGTAAGTAGTGACCGTTTATGCACTTTTTTAATCGAGAAAGTCTCTGAAAACTTGTGAAAAGTCGTAAAATTTTCAAACGAAAACAGTGCCGTTTACCAATTGTTTTGTGTTGTTGGCCATCATAGCCGACTTGGTTACCTTTTACTTACTACCTGGTGTGGTTTTAAAAAACATGTCTGTCTCACTACCTGAAAAAACTTTATACAGGGTGCTTATTCTTTATTTATCATTAAAAGGATGTCTTGGATTCGTCGACGTCATCCCAAAAGAAGCGATCGCCCT…	no					11.3437	-0.870199	-1.3246	3	753	Non-Horn
contig_429	GGTCAAAGTCAAACTTTTGTACATAAACGAAAAACGTCAAGTCCTGTCAAGTGTTTCTATTAACATGTTGCCGCTTTTGTTGTTGAATTTTTATTAAAATTACACATTTCGTAAGAAAATGTGATTCTCCGCTACGTAGCAGCGGAGGGGCACTGAAACGTCGCGATGCGGAAATACAACCGACAGTTAGACTGTGGAACGTGATTTTGGGGCCCACAGTACAGGCGAGGAAACATGTCCAAGTCGACGGAGTTG	no					10.1277	-2.30131	-1.73805	4	255	Non-Horn
contig_430	GAAATCAGTCTTAACTTGACACATTACGAAGCAAAATACAATTTGAAACAATCATTCCGATTGAATAAAAACCTTATAAAAACGTTATATTTTCACGATGGCTGCACGTTACGATAGAGCTATTACGGTTTTTTTCACCTGATGGTCATCTGTTACAAGTGGAATACGCCCAAGAAGCCGTCCGAAAAGGGTCCACAGCGGTTGGAGTTAGAGGTAAAGAAGCCGTCGTATTGGGGGTAGAAAAAAAGTCTGTAGCAAAACTGCAAGAAGAAAGGACAGTACGGAAAATATGTCTCCTAGACGATCATGTAGTAATGGCATTTGCTGGTTTAACAGCTGATGCAAGAATTTTAATAAATAGAGCTCAAATTGAGTGTCAATCTCATAAATTAACTGTTG…	no					11.2526	-1.91393	-1.64133	3	921	Non-Horn
contig_433	GATTGATTAATGTTAGAAAGAGATAACAAAAATGGGAGAAGTGTAGTGTTGAAAAAAGATAACAAAATTTCTGTTTTTGTGTTCAATGCGTTAAATATTTGAAGCGAAAAGCACGTGTGTATTAAAATTTATAACAAAATGACTGAATTGAACAAAAAATCGAAACCGAAGTTGAATAAAGTTGAAAAAATTTTACAACGTGAAAATGTGTTTATTAAGGATTTATACAATGTTTTATACCTCCCGACAATAAAAGAAGAAAATTATGAATTGGAGGATGATCTTTTATCAAAAAAACCAAATTTTAATAATTCAAAAACGACGAGAGCTAAATCGTTGGTTGATTTGCAAGAAAGAATAAATAAATTAAAAAATAAGTCAAATTCGAATTATAAACAA…	no					8.06483	-1.90239	-1.9406	2	564	Non-Horn
contig_436	GGTACGAAATTGTTTTGGAAATGGATGTTGACAGATATCCTTTGCATCGAGCTGTTTTTGAGAACGATTTGAAGTGTTTATCGCGGCTTTTAAGGAAACACGATGTTACAACTAAGGATAGACACGGGAACACCGCATTGCATTTGGCCGTTATGTTGGGGCGAAAAGAATGCGTGCAATTATTACTTAAACACGACGCCCCGGTTAAAGTTAAAAACGGACTCGGATGGACGGTTTTAGCCGAAGCTGTTAGTTACGGACATAGACCCACAATATCATCGTTAGTAAGGAAATTCCGGCAACAATCTCGCGAACAAATGGAAGAGCGGCGACCGAATTTAGTGGAAGCTTTAAACCGTATAAACGATTTCTACATGGAATTAAA	no					8.99594	-1.88906	-1.4707	3	385	Non-Horn
contig_438	GGCTTTTAGATGAGCAGGATTTTAGGGTGCAAGTTACGCGGGAGGATCTTGAGAATCTTCTTCCTGATTTCTTCGATCGCGTTAAAATCCCTGTTGAGCAAGCTTTAAAAACGGCGGGATTTTCGATGGATGTTATCTCGCAAGTTGTTTTGGTTGGGGCGGGGACCCGAGTTCCTAAGGTGCAAGAGATTCTGCGAGAGTTTGTGGGGCAAGATTTGGCTAAAAACTTGAATACTGATGAAGCTGCAGCTATGGGGGCTGTGTATAAAGCGGCCGATTTAAGCTCTGGGTTCCAGGTCAAAAAGTTTATTACTAAAGATGCGGTTTTATTCCCAGTTCAGGTTGTCTTTGAACGCGAAAGTGAGGGCGAAATTAAGCAGGTTAAGCGGACGCTTTTTG…	no					8.52243	-0.918396	-1.63494	4	783	Non-Horn
contig_44	GAGATTAGATGCGATAAAAATGGCGGATGATGTAGAAAACGACGACCAGTGGTTATACGGCGATAGTTCCGATCATATACCTCAAGAAAATGATAAACCAAGCGAAAACAATGAGGAAGTAGCCGATAAACCCATCGAAGAAGAAAAACCGCCGGAAATAAAGGAAAGTGAAACTGAAGAAGCTCCTCCAGAGGAGAATCCCGAAGAGCAACCAGAAAATGGATGAGGAAAATGGGGCCCCTGAAGATGGAGAGATTGAGAAACAACCAGGAGATAGTGATAAAGAAGATTTTGATGAAGACAGTGACGACGACGTCAACGTGGTTATTGGGGACATCAAAACAAGCCCCACTTACACTTCATTAAATATAAAACGAGGGGGATTATTAACAACCACCA…	no					9.29831	-2.08179	-3.15952	3	962	Non-Horn
contig_440	TTAACCACGCTCGAGTACGGTAAGGTTGTGCCAACAGGTAAACACTGTCTGTTTTGGACAGAAGGAAGTGTGTTCGTGTTGATTTGTGCTGCGTGTTTAACTGTTGTAAATTAATAAAATTTCTATAATAAAAATTTTTATTGGAAATTATGAAAATAACAGCATTTCTTCATTGATGAGGCTTAAAGTACGTGACAAGCCCCATTTGATGAACCTTCTTTGTTGGGTGCTGAGCAGTCGGGATTAGCCAACGGGCGACACGTGTTAACGTGGGCCCTCGGTCACACTCACGTGTGGTACCTTCTGTATCGGTGCGCACACTACGTCGGCAAATCTCAAGACCCAAACCAGAGTAGCGTTTCCATCTTGGACAATCTTTTCAATCTGGACGATGACGTC…	no					10.8851	-2.16015	-2.37366	3	1000	Non-Horn
contig_444	GTCAGTGCGATTTTTGTTGCGGAAGTCGTCGCATCGTGATCGTTCACTCGTAAAAATGAGTGCCCCAATAAAACCATGGGAATCGACTACTTTAAACAATAGTGCGAACATAATGCGTTCCAGCAACCCCAACCCTGCTATACCACAAATGGGGACCTCAACAACTCGACCTGCTTTACCTCCACGTCCCATGCAAAATTCGTATGGCGTTGGAGGTTATGGAAGTAGTTATAGTAGCCCATATTCTTCATACGGAGGAATGGGCGGATATAGTAGTATGCCATATCGTAGTTCCTTATATGGAGGTTACGGAGGAGGTTATGGTGGTTACGGCGGTTATAGCAGTTATGGTGGACTAG	no					8.82962	-2.41606	-2.54689	3	359	Non-Horn
contig_445	GGAGTGCGATTCTTTATTGCAGATGGGTAGGTTACTTTAGCACTCGCATTTAGTTTTATTATATGTGATGTGTTCGGTGGTGTACTTTTTTTAAAAAACATACTTATCTTGTTATTAATTTAGTGGGTTATATTAATTAGTTCGGGTCGTGCGAGTTATAGTGTTGTCTCGGTATATGTTTGGGGCATTCGCTATCCCCTTAAACCGAACAAAAGGAAGTTGTTTTTTTCCTCTCTTGTCCCGAGTTGTTTAAGTTGTGTTTTCGTGCGAAGCAACGACGAGCGTTTACGGATTTTATTAAATGTTAATATGGCCTTAGCCAGGCTGCCGGTCGTGAGTGATTGCTCTGCCGGGCAGACGGCTCGAGTGACCTCCAACCTCCATCCGACGAGCAGCATG…	no					10.302	-2.18807	-1.65588	2	606	Non-Horn
contig_447	GGAAAGCCGAGTACGTGAAGAAGCAAAACGCATCTTTGAAACACCGGCTCCCCTAATTAACAATTAACATTCAGTTCTTCGGTAGGATTTTTTTCAAGATATGACTGATAATGAAGACTTAGGGCTTGGGTCTGAGGACCAATTGGACTCGTTGGACGACACCAACGGTATCAACGACGATGCTCTTCTGAACGACACCGACGGTGACGGTGGCGGAGCAGATGACCCAGAACTAGAGGCCATCAAAGCTAGAGTTAAGGAAATGGAGGAAGAAGCTGAGAAATTGAAGCAATTGCAGAACGAAGTTGATAAACAGATGAATATGGGAAGTCCTCCTGGACTTACAAGTCCATTAAACATGTCTATTGAAGAAAAAATGGAAGTGGATAATCGCAGCAT…	no					10.6944	-2.23495	-2.65714	3	1132	Non-Horn
contig_448	GACGTTGATTGGACTTCTAAGCCGACGAGTCGTTTTCTATCGCAAGGATGGGAGTGAAATTAGTTACATCCAATATTTTCAAACGCGTTATAAGGATCTTTGCATTCGCGATAAAGGCCAACCTATGCTGGTATCGAGATCAAAAGCAAGGGAAATACGATCTGGAATGCCAGAAACTGTTTATCTTGTGCCAGAACTTTGTACCATGGCCTGGCTTGACCAACAGCCAGAGGTCTAATTTCCAATTCATGTCTGCATTAACTAAGCACACGCGAATTATCCCTCAGGATCGCGTTAATAAATTAAGAGACTTCCATAAGAGATTGGCTAGTAATCCAGATTCAGAGAGAACTACTGCAATGGGATATTAAATTTTCCAATGAATTGGTCCATTTTGAA…	no					11.6095	-1.73328	-2.64478	4	600	Non-Horn
contig_449	CATTGATCGCTGGAGGAAACCAACAGAAGGACTTCATCAAGCTTTGCCTAAACAAGGACCCATACTTTAGGCCGACGGCGCCACAACTTCTGTTCCATCCGCTTCTCTTCGAGGTTCACAGTCTGAAACTGTTAGCCGCACACTGTTTAGTTAACAAAAGTGCAGCGAACATTACGGAGACGATAACGGACGAATTAATGCAACGAGTGTACAGACCGGAAGTAGTAATAGCCGAGGTTAGGTACGGTGACCGAA	no					10.39	-1.43302	-2.06696	3	255	Non-Horn
contig_450	GAGATCAATTTTCTACCGTTGGCACGCATACATCGATGACATTTTCCAAGAACATAAATCCACTTTACCCAGATATACAACTCAACAGTTGGATTATCCCGGCGTAACCGTAACCGGAGTTGCCGTAAACCCACAAGCAGGAACCGCGAACAATTTCTCAACGTTTTGGCAACAATCCGACGTAGATTTTTCACGCGGAATGGACTTCCAACCCCGCGGATCCGTTTTCGCGCGTTTCACCCATTTACAACACCAACCCTTTACTTACAACATCACCGTAAACAACTCAAGCGGTGCTAACCGCATGGGAACTTGTCGCATTTTCCTCGGACCGAAGTTCGATGAACGCAAGAACCCCTGGCTCTTCAGAGACCAACGGTTAATGTTTATCGAGTTGGA…	no					11.3134	-0.108179	-1.61861	4	529	Non-Horn
contig_451	GAGTTGTCATTTTACCTAATTTTGTTGACATGTCCGAAATTCAAGAGAAACGATGGACTCATTTAAGGAAGATTTTAGAGCGCCCGGGGCCTTTTTGCCACCCCGAATTCGAGCCGTCGAAGGAAATCCTCGATTTCGTGATGACAACGTGTAAAGTGTTGGTGATTGGGGCCGGGGGGCTCGGGTGCGAACTCCTCAAAGATTTGGCCCTAATGGGGTTCAAACAACTCCACGTAATCGACATGGACACGATCGAATTATCGAATTTAAACCGCCAATTTTTGTTTAGACACAAAGATATAGGTATGTCCAAAGCTGAAATTGCTTCATCTTTTATTAACCGCCGCGTGGGGGGATGCCAAGTTACCCCGCATTTTTGTAAGATTCAAGATTATGATG…	no					9.46566	-2.33108	-2.18378	3	550	Non-Horn
contig_46	CAAATTATAGTGTTGAGGTCAAAACGTACCCTTTTTATTGTGCTAATCAAGACGTTCTTGTTCAAGAGAGTTATAAGTGTTCTTCTACCTGTATCAATTCACATTCTACGCTTATCACTATCGTTTCAACGGTCAATACAGCGGATTAGCATTGGTTTGTTCTTGGTTATTTATTCAGCATTCTATGGTATACTTTTTCCATCACTACGAGTTGCCGGCGATCTTGCACCAGGCGCAGATTGAACAGGTGTTGCG	no					9.3918	-1.55214	-1.95514	3	255	Non-Horn
contig_49	GACAGTTAGTATTTTGTTGTCTCATTGTGAAAAACGTTTATTTGAAAATGGCATCAGTTTTGTGTCCTGAAATAGCCCCCGCCGGGTTTTCTTTTGATAATTGCTCCAGAAATGCCGCTTTGGAAGGTAAGGGTTTCCCCGTCCCAAAAGCGACTAAAACAGGAACAACAATTGCTGGAATTATATTTGCTGATGGGGTTATATTAGGCGCTGATACCAGAGCTACAGAAGACACCACCGTCTCAGATAAAAATTGCGCGAAGATACATTATTTAGCCCCAAATATGTATTGTTGTGGTGCTGGAACAGCAGCTGATACGGAAATGACCACAAATATGATATCGTCTCAATTAGAACTGCATCGTCTTTTTACTAATCGCGTCGTCCCAGTTTGTACTG…	no					10.8449	-2.44267	-2.58742	3	729	Non-Horn
contig_52	GCGATTATACCGTTTTCGTTCGTTTCTACTGGTTGAAGACCTTGAGCAACCTTCGTCGTAGCGGCGGACTGGCATCGCCGATCGAGTTTTATTGTTGTTTATCTTTTAGTAGTTGCTTTGCTTCGTCGGTTTTTACACTAAAACACCAACCGATTGAAGAAGACGATAACCAGTTCTTGTTATGTTTTGTGTCAAGTCAGCAACTGGTTTTCGCGACGAAGCGAACGTGCCAAATACAAAAGTTTTCGCGAAATATTAAAATTTTTGTGATTACTTTGATTTTGTGAAGTGTTACTTATTTTAGTGTGGTGATACTTTTTTGTAGTTTTTCATTCGTGATATTATTGTTATTAATATGGATAATAAGTTTGAGAGCGTTTTTGGTGATAACAAGTTAAA…	no					11.5144	-0.965771	-1.98726	2	1129	Non-Horn
contig_53	TACATGGTTTTAAAAGCGAGCAACACTCCGTTTCAAATGGAATCGATTGAACTCTTTAAAGGGCAACACTTGCAAGAAGATTACTTAAAAATAACCCCTCTCCATAAAATACCGGCGATAACTGAAAATGGAATGAATTTAATTGAAAGTGTAGCTATTCTACGTTATTTAGATGCCACAGGAAGAATTAATGAGAAATGGTACCCAAAGGAACCGATGAAAAGGGCCAAAGTTGATGAGTATTTGGAGTGGCATCATATTAATATGAGAGCAGTGT	no					10.3135	-2.36313	-2.49207	3	277	Non-Horn
contig_57	GGATTTGGCACATGACACATTGCATTGGCCCCGTTTTAACGCGCATTTATGTTCGCGGTTCTCGTGCAGTTGCGCTTCAACCAACATGGCGAACGTGCGGGACAGCGATACCTCACTCTGGCTACATAACAAACTCGGAACTTCCAACGATTCTTGGACTGGAGGTTCGATATGCGGTCAATTAAACGCTGAAGTTCTACGAAACATCAAGGACTGCTTTCCTGACCTTCAAACGCAAGTTAAACTAAAATTGCTACTTAGTTTCTTCCACATACCTCGTAGAAACATCGAGGAGTGGCGAGTTGAGTTGGATCAAATTATAGATGTTGCTATTGGTGATTCCGAATTATGGGTTTCTATGCTTGCTGAGTCTTTAAAAACTTTCCCAGCTACAGGATC…	no					9.15051	-1.77903	-2.3683	1	751	Non-Horn
contig_58	GATAGTTCAAGTCGAATAACCAAACCGACACACAGACCTACAACAAAATGTTCAAATTGGTGGTGTTGTCCGCATGTCTGGCTCTTGCCTGTGGTGCCCCTAGCTTGGTGCATCACGCCCCAGTAGCCGTTGCATATTCAACCCCAATTGTTAAATCAACCGTAATCGAATCAGTTCCATCTTCAATTAGCCACCACAGCAGTTCGGTTGTTCATGGTGCCGCTATCGCCACTCCAGTCATCACTCCAGTCGTCAAAGCTGTAGAAACTGTGGTACCAATCGCGAAAACTGAAGTAGTTGGCAGTGTGTCTTCAATCAGCCACCACAGCAGCTCTGTGATTCACGGAGCCGCCGTAGCAGCCCCAGTTGTTGCCGAAGTTAAAGCCGCTCCAGTTGTTG…	no					12.7257	-1.20627	-0.756815	4	770	Non-Horn
contig_63	GAAGATTTCTCCAACTGTCATTAACAAAGTGTTCATTAACAAGTGGTCTAAAAGTCTTTAAAATCTTAAGAAAAGTTTCTGAAGCTTATCGAAAATGAATCGTGAGAAGAAAATGGATGATATTACTAAAAATATTTATTATTCGGATAAATACTACGATGACGAGTACGAATACAGGCATGTTGCGCTGCCGAAAGAACTCGTTTCGATGATCCCAAAGACTCATTTGATGAGTGAGCAAGAGTGGAGAGGAAT	no					9.55173	-2.23166	-1.4033	4	255	Non-Horn
contig_66	GAGTACGTGGTTGACGGATAAATTTCCTAGAAGTGTCGGCGGATAGAGAATGAAGTAGCATTTTCTTTAAATCAGACGTTTGTTAAATTATCAAAAGCGCATCTCGTTTACTTGAGCTCTTTTAGAACAATGAGCACCAAATTGGTGTTTTCGGGCACTTTGTCCAAGACAGATCCCCAACAAAAACCAGTACTCATTATTGGACAACTCAAGCATTTAACACAACTTCCTTATAATGAGATTAAGACCAAACTTGAACCAAGAGTTTCTGAGGAGGTTTATAAAATAGCAATTCCTAGTTTACATCCTTCACCTACTGACACCTGTTCTTTGTACTTAAACTTGGCTACTGTGGCAGCGTTGCCTGTTAAGTGTAGTCGTCATAAATTATACTCTGGT…	no					11.2028	-2.19492	-2.6758	4	1165	Non-Horn
contig_68	GGCCGTGATTTAACCGATTACTTGATGAAGATCTTGACTGAACGTGGTTATTCTTTCACCACCACCGCTGAAAGAGAAATCGTTCGTGACATCAAAGAAAAACTTTGCTATGTCGCTTTAGATTTTGAACAAGAAATGGCCACCGCTGCAAGTTCGAGTTCTTTGGAGAAAAGTTACGAACTCCCTGATGGTCAAGTCATCACCATTGGTAACGAAAGATTCCGCTGCCCAGAAGCTTTGTTCCAACCTTCGTTCTTGGGTATGGAAGCTTGCGGAATCCATGAAACCACTTACAACTCCATCATGAAATGCGATGTTGACATCCGTAAAGATTTGTACGCCAACACTGTCTTGTCTGGAGGTACCACCATGTACCCAGGTATCGCTGATCGCATGCAA…	no					13.965	-1.72564	-1.94594	2	735	Non-Horn
contig_71	GACAGATTTCATTGTGTCTCTAAAAACGGTGTTTGCTTCAATTCAGTATTTTCTTATCTTATCAGTCTAAAAATTTATCAAGAGGCCTTGTTTTAAACACCCCGTCATTTGTCTTTAGTGAAATATCTGAAGATCATAGAGAAATTAACATGGCTCCGTCAGTACAAACGTTTATAAATTCGTTCAGCAATAAACTAGAGGAACCCGTAAGACAACACTTGAAAAATGTTTACGCTTGTCTCACAATGTCAACTATGGCAGCGGCAGCTGGCGCTTCCATTCATCTCTTCACTAACATCATTCAAGCTGGCTTTTTGGCATCTGTAGGGGCACTTGTATGTTTCTTCTTATTAATGACCACACCTGATGATAATGGCAAAAAGTTGCATCTAAGAATTG…	no					11.4295	-1.74969	-2.41582	3	459	Non-Horn
contig_72	GACAGCGGTTTGTACTTAGCCATATTGAATGAAATTGATATTGGTTTAACTCAAATAAACGAATTGTATGAATTAAAATTGTAAAGATTCATCAGAAGAATTACACCGTATTGGCAAGAATATACAAAGAAGTCAGCTTTTTCACGTAGCTCATTAACTAAGAAAAATTAAGGTGCGGCTTCTTCATAAATTGGTATCATACGCAGGCAAAATTGATTCCTCAAATTTTAAAAAAATATCTTCTTCATTGAAGATGTCTCGATCGATTCGTGCAGAGACACGAAGTCGAGCCAAAGATGATATTAAAAAGATTATGCAAGTAGTTGATAGAGTTCGGCATTGGGAGAAAAAATGGGTAACAATAGGAGATACCACAATGCGCATTT	no					10.23	-2.35815	-2.44907	3	386	Non-Horn
contig_73	TACTCCCTGAATCGATAAACAAAAACCCAATTAAACAAGCGCAAACAAAACTCTTAACAACATAAAATCTATTGAAAAAAATCCTCATTGAACATTGTAACCATTGAATTAGTACTCTAAGAATGCTTCCCCACGGTTAATATCCGTTGGGATGGTTTGATGAGTGCTCCCTTTGACAATGCGTGAATATCCTGAGTACTGATTTTTCCTATATCCACCAGGCTTCATCCTTAACCATCAAGCTTTTCTATGGAG	no					12.5175	-1.09039	-1.14112	3	255	Non-Horn
contig_75	ACATAATTTGTAACGTTTTTATTAATCGTCAACTCATCTATAACTACCCTGAACAATTATTTGCTGAAGCTGGAGTTACGGCTATCGAACACGCCGATTTTCGATGGAATCGAACGTTTTAGCTTTGGTTACTGGAGGCGAAATCGTTTCAACTTTTTATAACCCCCGATTTAATTAAATTCGGGAACTTGTGAGGTTATCGAACAGGTTATGATTGGGGAAGATATTTCTGTTACGATTTGGGGGTGTTGCTTTGGGCGAAGCTTGTACTGTTGTTATCCGCGGGGCTACACAACAAATTATTGACGAAGCTGATAGATCTTTACATGACGCTTTATGCGTTTTGGCTGCTACAGTTAAAGAGAGTAGGATTGTTTATGGTGGTGGATCTAGCGAAAT…	no					11.1918	-2.42354	-1.53151	3	892	Non-Horn
contig_8	CGGGGGCACAAAAGTACTTCGAGCCGCGCCATATTGTCAATAGGCGGTTGTGTGAAAAAGTAATTGAACCGAAGCTCGACCCACCCATGACTCTTACGATAAGTGGATTATAGTTTGGGCCCCTCTTTACGTATAAAAGAATGCTGCTGGGCCGCCTCCACCACACCCCACTGTTGAACTCCACCCCATCGGTGCAGGACGTTAACTCCTCGCAATAGCTTCCCAAAGTTATTTAAACGCGGCCAGGCCGGCGTG	no					10.6981	-2.26057	-2.68116	1	255	Non-Horn
contig_80	GACCTCAGTGTCGTGCAAACATACTACAAAATGATATTGATTAAAATCGCACCAATTTTTGCCGTTTTGGCTATATCTTTAGCTCAAGATTATCAATACGATGCTCCGGTTCGATCAGCACCATCAAGGTTGGAATCATCTGGACCAAAACCGACGCCTGTCCCAATTTTGAAACAAATTAACCGGCATAATGAAGATGGTTCCTATACTTATGGTTACGAAGGTGCTGATGGTTCCTTCAAAATTGAAACAAAACTTCCAACTGGCGAAGTAAAAGGAAAATATGGCTATGTTGACGATACTGGAAAAGTCCGAGTGGTGGAATATGGTGCCACCAAATACGGTTTTGAACCAGCCGGTGAAGGAATTACCGTAGCTCCCCCCACGTTAGTCGATGAA…	no					12.7972	-1.44853	-1.55253	3	1367	Non-Horn
contig_81	GGTGTTGTTTTATGTCACCTTTCCAAGTTAAATGCTATAGAGTGACGTCACTCGTCCGTGGGCTTTTCCCAACGCCGAAAACACGACCAACCATCGAAGTAACATTGTCACGATTACGATAAGAATCGCATCGACGGAATTACTCATCCTACGTTCAACACAAACAGTTTCGATCAGTACGTTGAACAGTTTCGAACCGAGAATAGTCGAGCTACGGTCGAGTGACGAACGGGTTAAGGTCATAACTGTTTTTAA	no					12.1281	-1.06266	-2.18858	3	255	Non-Horn
contig_85	GAGTGTTGTTGATACGTCAGCATTGAAACGACAGGTAGCTAAGTGTGGTTATCAGGAAAAAAAAAGTCGGAAACTTATTCCGAAGAAGCGAAAAAGAAAAGGTGTTTTATAAAATAAAATAACCAACCTATAATGCGTCAATCGAAGGGTAAACAAAAGGAAACGAGCAAGGATAAGAAGCAGAGGAAGAAAGATTTCGAAGACATTCAACGCCAAGTTTACACGGTGGTGATACCAGCGGTAATTGGAATTTTGATACTCATTGCTGGGTTCGTCTACATGAAAACAAGACCACAAAGTTATATAAATGCCTGATCTAATAATTATAATCATAAGAATGTTATTTACAATAAAAATTTTTTAAATTGTC	no					8.76282	-2.55986	-2.34043	4	370	Non-Horn
contig_87	GATTACGGTTCAACTTATCCTTTAACAACCACAAATTACTCTTCAATTACTCCTCAAAGTCATCCAATCATGTCTGAAGCCGGAAATTTAGTGTTATTGTCGGTTTCTGATAAAACCGGCTTAATACCATTGGGAAAAGCTCTAAATGAGCTTGGTTTTACGTTGGTGGGAAGCGGGGGAACAGCAAAAAGTTTACGGGAAGCTAATTTACCTGTTAAAGATGTTTCCGAAATATCTGGAGCCCCGGAAATTTTG	no					11.9338	-1.72165	-1.91268	4	255	Non-Horn
contig_89	GACAGTCAGCCGAAGGAGCCCGTGTTGGCTAGTCACAACTTCATCCCAAAAGTCCAGATCGTTTAAACTAAAAAAGTCACCATGGCGGATGATGAGAAAAAAAAGATCGATGAGGAAAAGAAGAAGAAGCAGGCGGAAATCGACCGCAAAAGGGCCGAGGTGAGAGCCCGTATGGAAGAGGCCTCCAAAGCTAAAAAGGCCAAGAAAGGTTTCATGACACCTGAAAGGAAGAAGAAACTTAGGTTATTGTTGAGAAAGAAAGCCGCTGAGGAATTGAAGAAAGAACAAGAACGTAAAGCTGCTGAACGTAGACGCATCATTGAGGAACGTTGCGGAAAACCAAAACTCATCGACGACGCCAATGAAGAAAGCCTAAAATCTATCTGCAAGAATTACAAT…	no					11.6181	-0.0871234	-1.41594	4	774	Non-Horn
contig_94	TCAAAATTGTATAAAACTCTATGTGACGTGTCGGTTTTAATTTCCTTTAAAAATGAAGCTTTGGGAAGGTTTAAGCTTTTTAATCCTTTCAACGTTCATCTTAAACGTTGACGCTTTATATTTCCATATTGGAGAAACAGAGCGGAAATGCTTTATAGAAGAAATCCCGGATGAAACGAAAGTTATAGTGAATTATAAAGTTGAATTATACGATCCAAAAAGCGGTGGTTTTATGCCATCAACACCTGGAATTGGGATGCATGTGGAAGTTCGTGACCCAGATGATAAAATGTTGCTGTCCCGTGTTTATAGTTCCGAGGGACAAATCTCATTCACCTCGCATACGCCTGGCGAACACGTTATCTGCATGTACTCTAATAGTACCGCTTGGTTTAGCGG…	no					9.55604	-2.49126	-2.19647	3	760	Non-Horn
contig_96	GTCTCATTACTTGATAACTTCCAAAACAAAACGTGGAAGTGAACAGAACATATTTTTCACAAATTATAAATTATTTTATGTTTAAAATAGTGAATTTATCAATAATTTAAACTAATAAAGTATGGTTTTATTAGAGAATGACGTCTTTTTAACTGAATTGACCAAGTTATTTCAAAAAGCGAGACAAACTGGGTCTGTTATGATGACTTTTAAACGATATGATGGTTATGATAAACCAATACCAAGGCGTGGAAATCCTCCACTTCCAGAACCACAGGAACACATGTGCATAGTTAGAGCGAAATCTAGGACAAAGAAAATCTCCACTGTCATTCATCAAAAAGATATCAATAAATTTCAGGTTGCTTATAGCAGTTTATTGAAGGGTAATTTAGATGG…	no					10.5887	-2.44355	-2.00574	3	577	Non-Horn
contig_98	GACCAGTCACCGTAAGAAAATTGAAGTTAACGCATCCCCGTAGCATCATGAACGCATTCTCCGTGTGGGTGGCCATAACAATGGCCGTGGTGGTCGTTGCAGAACCACCTTCTGGTTATTCATACAGTAGACCAAGTGGAGGTGGTGGAGGTTATTCCGGCGGAGGTGGAGGAGGATATTCAGGCGGTGGAGGATATTCTGGAGGTGGAGGATACTCAGGAGGCGGTGGATACTCAGGAGGCGGTGGATATTCAGGTGGTGGTCTTTCCGGAGGAGGAGGTGGTTACCAAGCAGTACCTTTTGGTTACCAAACCAACGAAGGAGCAACCGTTGATCCAGCCCTTTTAGAACAAGTCCGCCAAATCATCCTCAAAGAAGAAATCTCATCCCAATCATCTT…	no					10.8549	-1.97642	-1.64086	4	720	Non-Horn
contig00004_a1	GGAATAGATTTGCGACTAACTTCGTTAAGACAAAACCGGTAAAACTGAATATSATTTCTAATTTCTACGTCACTTTCAAAGTTCATTTTTGATTAAATAACACGTTCTTAATTCGCAATTAGATAACTAACGCCGATATGGCCAGTATTATAAACAATTTAGTGCGTAAGGCCCCAGAATTAGTAAGGTCGGCAATCCCGTTGGGTCCAACCAGTTTTATTCGTAGCATAGGAGGATTAAGCMATGSTGGTTAGKGTTCCAAAAATACAACATCCAGCCCCCAATTTTGAGGGCATGGCCACAGTTGGAGATGAGTTTAAATTGATTCGTTTAAATGATTTTAAAGGAAAATATCTTATCTTATTCTTCTATCCTTTAGATTTTACTTTTGTGTGTCCC…	yes	contig00004	OtL019-B07			10.7202	-1.73005	-1.64555	4	983	Non-Horn
contig00013_a2	GATTCAATACGTTTTTGACATTTGACACATCATACAATTTATAACTAAAATATTTAAATTCTTTAAAACAGTATTATTTATAAACATAATCTAAACTTAAATCGCTTTATAGCATAATAAATATTTACGTTAGAATCTCTACATTCGAATATTTTTTATAAAAATGGTTTTATCAAATCAATTATCATTCGTAGYAGCATTAATTGTATCGTTGCTCTTATTTTCTGGTATGCAAATGTACAAACAATGGTTTATTTCAACGCAATTAAATCATTTTGTTGGTGGTTATTTGGGATCGCTTTTATTCGTTTTTTCGTTTACGGCCGTCGGAAATTTAGAGGCAAGCGYTTTCGGGAAATCGTTTCAATCGAAAATGTTTCCCGAAGTAATAATATGTTT…	yes	contig00013	OtL013-D11			9.28909	-2.8955	-2.15028	4	783	Non-Horn
contig00025_a3	GGACGTKCAGTCAAGGAAAGTTAGACATGTCGCGCTGTTGTAAGAACAAGTGATAGTTAATTGTGCACGAAATATTTGTGGGTAAACCTTCTAAATTACACAATCGTTCGTTTTAAGTAAAGACGAAGACAATTATCTAATGGCATCCATAGCCACACTGGTCGTCRAGCCTGAGTTTATAGTTGGTGGAAAATATCGTTTAGTCCGTAAAATCGGTAGTGGATCTTTTGGTGACATTTACTTGGGTATCAACATTACGAACGGCGAGGAAGTTGCTGTGAAACTAGAATCAGTTCGAGCAAGACATCCACAACTTTTATATGAGAGTAAGCTATACAAGATCCTTCATGGAGGAATCGGTATACCACATATCAGATACTATGGTCAAGAAAAAGAGCA…	yes	contig00025	contig_23			11.4537	-2.27788	-1.64186	2	994	Non-Horn
contig00062_a4	GGGTTTTCGGAGATTTGAATAACATTTTTAGGGTCGCCAAATGATCCCCCCCGCCGTAACGCCCTTTGCGTTGATACCCCTGCTTGCGGCCCTTTTTTTTTTTTTTTTTWTCTTTTACCATTTTTATTTATTAAATGTACTTATACATTGTCTTAACTTAAGCAGCAGGATCTTCTCCCTTTGTAGTCCTTGTGTAAATAAGTTGGGCATGATGTTGAACAACTTGTTTAATTAAACCTTTCTGTTGTAATTCAATCAAAGCTCTCCTTGCCAAAGATCCCCTGACCTTTAATCTTTCAGAGACTACAGAAGGCGTAATAAGTTTGTATTGTGGGACTTCTTTATAAAGCTTCTCATAGGTAGCTTTGTCAAACAAAACTTGGTTGTTTAACTTATCCC…	yes	contig00062	OtL004-G07			12.9182	-1.57936	-2.17259	3	575	Non-Horn
contig00068_a5	GGCATACACACGCGGTCCACTTCTTGTTTATGAATTTTACACATCGCGTGAAAAACCCAGCCCAACCACTATCCCTCCTGTTTTTCTGGGTATATAAGAACCTTTTTGCAACGATTTAACACRACACTACCACAGTGTGTCTTAAAGTATTCAGTTCTTTGTGACTACAAAAAGAAATTTTTTGTAAATTTAAAAAAAATGAAATTCTTGATTGTTGTACTTGCCATTATTGGGGCTTCACTAGCTGAAGACGCAGCTCCCGCCAAAGAAAAACGGGGTATTCTTGGAGGTTACGGATATGGTGGAGTTGGTTTAGGTGTCGGCCATGGAATTGGATATTCAACTCCTATTGTAGCTGCTCCAGTAGTTGCCGCCCCGGTTAGTTATGGATATCWTGGA…	yes	contig00068	contig_106			10.934	-0.807263	-1.3111	3	784	Horn
contig00086_a6	GGTACTCAGTTTGTTCGAGGCCCGTTCAGCAGCAACAAGTGGATGCTCAGCGACAGCAGCAACAGCAACAACAACAGCAGCAACAGCAAAACGCGGCGGCAGCGGCAGCAGCAGCAGCAGCGGAAGCGCACAGACAAGTGGTAGCGGAAGCGCACCGACAGCAGCAACAACAAGAAGCAGTCCAGCGACAGCAGGAAGCACACCGGCAGTACCAGGAGGCTCAGGCGCACCTTCACCAGCAAGTGGTAGAGGCGCAGGCGAGGCAAGCTCAACTCCAGCAGGAACAACACCAGTTGGTGGCGCAGCAGCAGGTACAGCAGAACCACCACCACCACCACCCAAACAACCAGCCGCTGCAACAGCAGCAGATTTTGGCGGGCCTGCAACAGCACCAGCAAC…	yes	contig00086	contig_413			12.9413	-1.85992	-1.714	3	1387	Non-Horn
contig00089_a7	TTGTTCGTCGTTTTTTTTTTTAATTAAATATTTATTTATTTATTTTCGCGCATCGAGACCCCGATTGTCGTAGTTGTATATTGAGGTTCTGAGCGTGCGGATGTCCGATTTCTTTCTCGTCCCAGTCGTTTACGACTTCGACGTTTTTGTGAATGTGCGGGAATAAACAATGTTTCTCATGGGATAACTTTTAAAAAAAAAGCCATCCATAATATAAAGTGAACGGTATGRTGGAACCGGAAAGCAACGTTGAGAAGAAGGGTAACACCGAGTATCAACCGACGAAATGTCGGGTGACGAAGCCTCCGCCGCCGAAACCGGCTGCAAATCCAATGCAATTCGTTAAGGTAGCGCCCTGTCCATTAATTCAAARGGCTCAAGACCAGGTGAAAAAAATTC…	yes	contig00089	contig_325			8.14446	-1.59463	-1.17843	4	598	Non-Horn
contig00090_a8	GGSAGTAGCAGATCACATCATCATCCAGTGTAGTGACTAAGAAAATACATCGAATTTTCAAAAATGTTCAAATCTCTGATTGTTATTGCTTGCGCCTTTGCGGTTGCTTCTTCCGGTAACGTAAAGAGGCGAGTAGTCGTCGAAGATAGCAAACCAGCCGCCGGTGGACATTACCAGTCAATTTCTCTTGATGATGGAGGACATGGTGGTTACGGAGGTGGKGGTGGGTGGAAAAGGATTTTCCGCTGGAAGTGGATTAAAAACCATTGCCCAAGGAGCTTCTGAACAAGCCAACAATGCCGTTATCAACCAACACGCCGCCGCTAAACAAGCCGCTTTTGCAGCTAAGAGTACTTTGGCACAAGCTGCCGCTGGAGCTGCAGCTACTGCTCAAGCAGC…	yes	contig00090	OtL010-E01			8.09607	-2.10782	-2.63759	2	880	Non-Horn
contig00093_a9	CTCGAACGACAGAGACGTTTATAGAAGGTACTCGAGGTCGAGATCGCGATSGACCGAAGAAGAAAYCGTCCATCGAAGGGAGGACTCCCCCGAGAGGCCCGTTGTAACCGCCGCGGATCTGGAAGGGAAAAGCCCCGACGAACAGGAAATGAYGAAGATGATGGGTTTTTGCAGTTTCGATAGTACCAAGGGAAAGAAGGTCGAAGGGAATGACGTCGGCGATGTTCMCSTTWTTACTAAAACGAAAGTATAGACAGTACATGAACCGTAAAGGTGGGTTTAATAGACCCCTTGATTTTGTGGCTTAAGACTGATTCTTCCTTTTTAGTCCCATCCTTATTGATCACTATTAATTATAAGATAAATAAACAAATACCTCCTCATCTTATCCTCAACTTA…	yes	contig00093	OtL011-F01			9.44998	-2.17149	-2.6834	4	682	Non-Horn
contig00148_a10	GGATACTTAACCGGAGGACTTTAACTCCATGAAGTCGTTTCGTCAGAGAAACGCACGGAAAGTTAAAAACAAACGTGAATGTTATCAGTTTAACCGGGAATAAGCCCGAAAAGGTGTCATAAAAATGGCCACACGAAAATTTCTTCAAACAATCCTTAAAAACGGAAAAATCAACCACCATAAGTTTTATTCTTCTGAATCGCCTTTATTTCCTGGGGCACGAACAACATGGACCGAAAGATTAGATTTTACCGGGCCACACAGTTATTCACCAATTCCCGTTTATCGAGTARTGGATCGGCAAGGAAATATTATAAAATCATCTCAAGATCCAAAATTAAGCAATGAAGTTATCGAAAAAATGTATAAAGATATGACCCTGKTAAAAACSAWGGGAWA…	yes	contig00148	OtL019-E02			10.1562	-1.62512	-1.85773	3	815	Non-Horn
contig00164_a11	GGAGCAATTACAATATTATTAACTGATCGAAATCTTAATACATCTTTTTTTGATCCTATCGGAGGTGGGGATCCAATTTTATATCAACATTTATTTTGATTTTTTGGTCATCCAGAAGTTTATATTTTAATTTTACCTGGGTTTGGAATAATTTCTCATATTATTAGACAAGAAAGAAGAAAAAAAGAAACATTTGGTACATTAGGAATAATTTATGCCATAATAGCTATTGGATTATTAGGATTTATTGTTTGAGCTCATCATATATTTACTGTAGGAATAGATGTAGATACACGAGCCTATTTTACATCAGCTACTATAATTATTGTGCGTGTTCCTACGGRAATTAAAATTTTCAGTTGATTAGCAACTTTACATGGAGCTCAACTTAACTATTCT…	yes	contig00164	contig_83			13.3507	-2.45598	-2.39827	1	964	Non-Horn
contig00166_a12	AATAAATCCTTCCAGAAGAGTCCCTTACAATTGGTTGTGAACGAAGTTCTATAGCAGACATTTTATTAATATCATTTTTAAATTGTTGATTATAATCAAATTGCATCTCAAGTAGCTGCTTTAAAATCCTCAATTTAGATCCAATCCTAGCTTCTTTATAACCAAACCTTTCCAATTCCCATCCGTCTTTACTACAATATGTAGTGTGACAAAGCTTTATAAGTGCCCTTTCCCAACGTTCAGAAGATACAGACTTCCTCGCCTTCCTCAATAACTTTATGTGAAGGTCAATAAGTGCTTGAGGAACTTCTTGGGTATTTTCGAGCATTTCTTGTAAATCCAAAAAGTCTATGTTATTAAGACCGCACATCGCCCCGAAACGTTCGAGGAAACCGCAGA…	yes	contig00166	OtP014-E06			8.92174	-2.12461	-1.60628	2	682	Non-Horn
contig00175_a13	GGAGTATTCAACGAGTACCAACTTAGTTCGTTTCGCGACGTCTTCAAGAATCAGTGTCTTTGCCGTCGATGAAGTCGTCGTGTGCGCGAGTTTGAGATGCATCGCGAATAACCAAAAAGAAATTATTAATTCAAATCGAAATCGTTTATACACGAACCCAAGATTAACAAGAAAATAATTAAAATAATCCACCAYCATCTCGTTTAATAATAAACAACAACAAAGATGTGCGATACAAGTAACGCTTCTACGCAGAGCATCGCTGATTATTTGGCTCAGTTATTGAAGGACAGAAAACAACTGGCTGCGTTTCCAAACGTGTTCCTTCATTTGGAAAGGCTTCTAGATGAGGAAATTGCCAAAGTACGAGCAAGTTTATTTCAAATAAATGGAGTGAAG…	yes	contig00175	contig_373			7.82092	-1.85137	-0.323927	4	923	Non-Horn
contig00196_a14	GGTTGGTGGTGGGGGTATCCTATACAGAAGCTTTTATTGTTTGATGTCCGTTAATTCTTAGTGKTTATTGATTCTTTTTCTRCACAACAAAAGCAGGTACAAACACACTTAACCGGCAAAACTCATTAGAGATGAGTTCAGTAAATAAAGAGAGCGAAAAAACGGAAGATAAATTAGAAATAGCTCGTGAGGAAAAGGAGAAGATATTAAATGAAGAGAATAGGGCTCAGGATAACAAAATGATGGAATCAGAAAGTACTGAAGGCTCTAAAATTAAAACTGAATTTAAGGATGGTATGGAGGTTAAACCAAAAAAAATACCTATTGGAGGGATTCAAATGCCTGGATTTTTTATGAGGAGTCGATCAAAAGAAAAGTGCAAGGAAGGTGATTCAGAAA…	yes	contig00196	OtP015-E03			9.83035	-1.40549	-1.37966	2	872	Non-Horn
contig00202_a15	GGTTCTAGGCCGTTGTTGTGCGCGTAAAGCGTTTAGGTAGACGGCGTCCTCGTATCCATTTTGCTCTGTGTATATGAAAATCATTGGGGCGCAGTCCCGTTTAGTCCCATCGAAAACGTACCTCGTTCGATCGGAAGAGATTAGATGTTATTGTAAAACGTCGCGCCAACGTCGTCTCCGTTGTGCTGTTGCTGCTGCTTTTGAAACGGATTAAAAAATGAATTTTACTCCTTTCGGTGTTGGTGTGCCCCTTACGGCRGCACTTCCGGTTGGCACGCAATTCACAACAGGAAAAATAACGCAAACGGGCACGACGACGAACGGACAAGTCGTCGGGGTGCTTCAAGGTTGTGAAAATGGGGTACATTACATCCGGCCTTTGGATGCGAATGCTTTTGC…	yes	contig00202	contig_426			9.99339	-2.49592	-2.1112	3	747	Non-Horn
contig00212_a16	GGTGTCRSKATGGCCACGTAAGTTTTGTTATGACATGAGTTACAATTTCGGGTGACGTTTAAAAAAAGGGGGATTCGTGGTTTTAACGTTAGTTTAGTTGGTTTTAAATGAATGTAGGTGTGATAATGAGTGAAAAACTGTGCCTATGGCTTGYTCTTTTGGTGATTGTGAACGTGTGCAGAACGTTAGCGACCGAACTAACCTTCGAGTTGCCGGATAGCGCGAAAGAGTGCTTTTTTGAAGATATTGAGAAAAATACAACAGCTACGTTAGAATTCCAGGTAGTAACTGGTGGTCAGTACGATGTAGATGTTTCACTTCAAGATCCAAAGAAAAAAATTATTTATAATCAAGTAAAAACCCAATTTGATTCACACACGTTCACAGCGGAGTCCACAG…	yes	contig00212	OtL015-B01			10.5856	-1.9906	-3.74942	3	792	Non-Horn
contig00222_a17	CAGAACAGGAGGGAGTTTCGCAACAAAGTGTAACTAGAGTCCGTCGCTTCCAACGCGAATTGGAGGCCGCTGAAGATCGTGCCGACACCGCCGAAAGTAGCTTGTCTCTCATCCGCGCCAAGCACCGCACCTTCGTAACCACAAGCACAGTTCCCGGTTCTCAGGTGTACCYTGTGTCCAGGACACCCGAACAGCTGAATACTAAACTGCCGCTAGAATCCAGAATTTAATTATTTTTTATTTTATTTTCTTGCACGTGTATATTAATTAATTATTTACAATTTACTGTTATCTCAAGTGTATAATTATTACTACCGTATTACAATATTGTTAASTGTTATAAACCACTCCCTTTCGACCTCTTCAAACCTCTCTTCWRACCCAGCAAGCTCTACAAAY…	yes	contig00222	OtL004-H02			11.2491	-0.52829	-2.0285	4	754	Non-Horn
contig00226_a18	GTAGCGGTTTCGAAGCGACCGTGTCGATTCTATGAGGAGAGTCTGTCCCACCTTTTTCCCTCGAAGTTGGTCGTTGTGCACTCGGTGACCAGCTGCAAAACACATCGTCGAGAGACCCAACTCAAACGTTTTCAGTACGGCGTTCCGGGCAGAGAGATTGTTGCGTTGTGCGCGCTACTTAGCTCTTCGTCGTGCGGTTTTTTTTTTGTGCGTTCAAAATTGTTTCTGTCGAAATTGAAAAAAATTAATAAAACAAGTAAAAAATGACGGAAACAGTTGTTACCGTTGAAAATGCGCCCAATAATAATACAGCTAAACCAAACGAAGGAAACGGATTGAGTTTTATCAAACTCAATGTGGAATATTTTAAAACTTTACCTGGAATAATTAAAATCATCG…	yes	contig00226	OtL012-E03			8.00564	-1.86606	-1.91406	3	1118	Non-Horn
contig00239_a19	CTCCTTTATGCAGTGGTCGTTAAAATTAGATTTGCCGGGGTCGAAGAGTAGTGATGGGTGCTTACCCATCGTTGTTGTCGTCGGGGGCAAGGAAGGCAAGGAAGGAAGGCGGCATGGCAAAGATAGCGAAGCAAGCTGGAGTAGAAGATGGCCATGACAGTGCTGCGATCGCGGTCTCGAGGTGGCGTCAGGTAAAGGTAGAGGAATTCAGAAGAAGAGGTGGGGAGAGGCAAAACAAGGTAACAACCTGTTGTGACGTCACGGCGGCAAAAGCCGGTCCTCCTCGTGCTCCCCACCATACTCTACGGCAACATCACCGGGGACGACGTKAGTGTTAGTGCCCGACTCAGCGAGTGCTCGCGAGGAGATATTTTACTTTTCTCTACTTTCATCGCCGGC…	yes	contig00239	OtP019-D06			8.52811	-1.31441	-1.32358	2	1094	Non-Horn
contig00259_a20	GGGTACCTTGCGAACAWAAACGTCAATTTGTGAAGGCGTTGATGCATTAGACGAAAACGCTCTTCAACCCCATTTACCACTTAATTCGTCAATATTTATATTACTTTTCGATAATTTTCATTAAAATTATTTATTATTAACCCCCCGTTAATCCACACCGATCGTCGAACGGACAATGATGTTGTTTAAACGTTGTTTTCGTCGCAATAAGGATTAGTGTTAAAAACAGCTTAAGCACGTTCAATTTAATTTTTAGTTAATAATTAGTGAGAAGTGAGGTAGAGAGACACAAGGTGCAATGTCTTATCCGGGAAGACCGCCGATCGTGCAAGGATTAGCGATGCCCCCGGGCATGGCTTATATGCCCATGACGGCTCCGCCACAACCTCTTTTGCCATC…	yes	contig00259	OtP015-F11			9.64655	-2.0914	-2.22629	1	1040	Non-Horn
contig00261_a21	GACTAGAAAAACGATATGGCCGATAAGGTGRAATGTCAATTTTGACAGATTAGGTTATTGTTATTTGTAGGTATTGTTTTATAATATTTTTACATTAAACAATAATTTTATGCTGCCTAATAAGGGKTATAAAGATAAATATATAAACACCCCACCAAGTAATCAACAAAAATCAACCATGAAAAAAAAGGTATTATTAATGGGTAAAAGCGGTTCAGGAAAAACCAGCATGCGTTCTATAATTTTCGCGAATTATATTGCAAGAGATACACGAMGATTAGGAGCTACAATCGATGTAGAACACTCTCATGTTCGTTTTCTTGGTAATCTCGTTTTAAACTTGTGGGATTGTGGTGGACAAGAAGCTTTCATGGAAAATTACTTCGCCTCGCAAAGAGA…	yes	contig00261	OtL001-H03			9.47954	-3.77653	-3.19447	4	1220	Non-Horn
contig00274_a22	GGATACTTAAACGTTAACCTAKAAAMAAAGTGTAAGTTTGCTTACGTTTGAWATCGTTCCAATTGATTTATTTCTCATAAAAAAATGACCGCCGACTTCTACATCCGTTATTACGTCGGCCACAAAGGTAAATTTGGTCATGAATTTCTCGAATTCGAATTTCGCCCCGATGGAAAGCTCCGCTACGCGAACAATTCTAATTACAAGAACGACACGATGATCCGAAAAGAAGCCTACGTCCACCAATGCGTTATGGAAGAACTCAAAAGGATTATAATTGATTCGGAAATAATGCAAGAAGACGATTCATTGTGGCCCCCACCCGATCGTATTGGACGCCAAGAACTCGAAATTGTCATCAACGATGARCATATTTCTTTCACCACGTCTAAAACGGGC…	yes	contig00274	OtL019-E08			9.89579	-1.23975	-1.89433	3	587	Non-Horn
contig00300_a23	GGACGCGCCATCTTGCCGGCGAAAATAAAAACGTCAAACGCCGGTTCGCAAGTTTCAGTCGTGTTTTTGCGGTTTTATCGTGATTTTAAGCCCGATTTTTCAAGTTACGCTTCAAAAAGCTTCAAAAATCAAAATGGTCGATGCTTACTTGAATAAAAAATACAAACTCGCTTCGAGCGATAATTTCGATGAATTTATGAAGGCGTTAGGTGTCGGGTTAATGACTAGAAAAGTCGGAGCGACCGTCTCCCCCGTTGTCGAATTGAAAAAAGAGGGCGACACCTACGTTTTAACCTCAACATCCACCTTCAAAAACATGACCACCAAATTCCAACCCGGAGTTGAATTCGACGACGAAACCGCCGACGGCCGCAAAGTCAAAAGCATCATCACCATCGC…	yes	contig00300	contig_1			11.6088	-1.50429	-1.66002	4	685	Non-Horn
contig00350_a24	GGTCATCTTAATAGTTAGGTGTTTAAAATTAGTTTTATTCAAATCAGCGTTGTTTAATTATTAATATTGAGTTAAAACGTTGGGATAAAACCCAAATATTTTTTAATTTACTAAATGTTGTTAATTTTTGGTTATGTTTACTTCCACATGTAAAAAAYTTCTWKTTTTCKTTYCAAAWGTCTACACATAGGAAGAAGACGAGGAAGCTAAGAGGACACGTCAGTCATGGGCATGGACGTATCGGTAAACATCGTAAGCATCCTGGTGGTCGTGGTAATGCTGGTGGTATGCACCACCATAGGATCAACTTTGACAAATACCATCCTGGTTACTTTGGAAAACTTGGYATGAGAAATTACCATTTAAGAAARAATTCTAAATGGTGCCCCTCAATCAATT…	yes	contig00350	OtP009-D11			12.365	-1.31764	-1.54039	3	648	Non-Horn
contig00479_a25	GAGTATTTCGCACAACATGATGTGGTGAAGATCCTTTTTAACASAAAAATGATTGTTTAAACATTTCCAAAATGCCTCTAAATCCATCAAGTTACTCGAAAATCTTTTAAAAGCAAATACGTCCAAGACGACGACGACGAAGAAAACAATCAAAATTTAAACACAAACGAAGAAAACGATTTAGAAGGRACCTCATCATCGAGTTTTGTGCCGAGCTACTCAAACCCGAAGGTACAAGAGCTTCTATCGAAACCAAGACCCGATTTTGATAAGATCTTCTCATCGAGATATCTCCAAGACGATCTAAAATCAACGAAAACAYCGAGTTTTCGAAGYTCCTCCGTTGGTTTTGAAACAAAACCGAGAAACACAAACATAACCTCAAATTTACCTCCTCCA…	yes	contig00479	OtP016-A10			10.7276	-0.701671	-1.37856	4	1145	Non-Horn
contig00495_a26	TAAAAAAGAATTTGAACGACCGGAATCAAGACTTTCTTTTGTACATAACTCAAAAGGTGATTTAAAAGAAGATTTAGAAAAATTATTACTTAACGATGGTGATAGTCAAAAAGTGGATAACGTTTTTGTAAAAGACGCTGAAGTCGGTGTTGAAGGAGCCGCTTGTATGGATGAAGTAGATGATGAYCAAAAAATGGATGAGGATGAAGATGATTCGGATATGTGGATGGAAACGATGGCCCCACGATATCAATGCGAAGAAGGGGAATGTTCCGTTCAATCCTGTTTGAACCAATTCACCGCGTGCGAACTGATGACTTCCAATAATAAAGTTAGTTGTGAATTGTGCACAAARAGACACGGTGGGGCCGACAAAAAAACCGTCTACACAAACGCCCA…	yes	contig00495	OtL015-G07			11.4918	-1.3271	-3.0687	3	712	Non-Horn
contig00497_a27	TTTACGATATGAGTAGTAAAATAAGTATGCAGAACACATTAATGTGAGTTTCTATATACGATTAATACATACGCTAAATACATTGCTTAGAGTAATTAGACTATTTGAGCATCGCTATGAGTATTATGAACACGCATTGATTTAAATAAAACCGTTAATGAAGTGACTAATGGTAGTAACCAGTTGATGGTGACGCATAAGTTATTCCAGCAACTTTAGCAACAGGTGCCGAATACGCTACTGGAGTATGTGCAATAGATGACGTGTATGTTATTGGTGCATGTCCATATGTGGGGGCATGTGCGCTGTARGTTGTTACTGGTGCTGCATGGGCGTACGTTGCTACWGGAGCTTGTGAATATGCTATCGATGGGGCGATTTTGTCRATTATTGAACCAT…	yes	contig00497	contig_78			9.02643	-0.370406	-0.403625	4	1037	Horn
contig00510_a28	GGTGGAACATGAACTTTAGGTTTAGATAAAACAGATTTAACAGGAGCCTTCGGTTTCGCAGTAACTTTCGATGCTGGCTTTTTAACGCTTTTCGCTGAAGGTTTCCCTGCGGCAACCTTCGGCTTAGCAGTTGTTGATTTTGCTACATTTTTCGCTGCTGGTTTAGCAGCAGTCGCTGGTTTTTTCTCTGCCGGTTTGGCTGCTTTCTTTTCAGCTTGTTTAGGAGCAGCCGCTGCTGGTTTTGGAGCTGCAGCAGCTGGTGCTGATGCAGGTTTTGCAGCTGCTGCTTTTGGAGCAGGAGCCGCTTTACTAGAACCACCAGCCGCAGAGGCTGGGGCCGTCTTCTTCTTTTCTTCTTTTTTCGCCGCGGGAGRATAAATCATTTTATCGATTATTACA…	yes	contig00510	contig_15			9.78259	-2.36697	-2.36273	3	991	Non-Horn
contig00540_a29	TTTTATTAAACATTTTTTATAACAAAAACAATAAGAAATAACAACAAAAATTATTTATGTAACAAAAAACAAGAACATTTCAACAACAACAAAAACTTTCAACAATTAAGTAGGAAAATAAATAAATCCTGACAAAAAGTAGCACGCAATTAAAAAAATCAGTCTAATTTCTTAATGATGACCATCATCGTGACTATGATGGTGAGATTCATGTTGGTAGACATGCTTATAAACTGGAACATGAACTGGATATGGTTTGTTGACATGTACTGGGTAATGCTTTTCGATTTCAATTTTATAAGGTTTCTCAATGTAATGTGGTTCCGGTTTTTCAACAGTGATTGGAATTTTCTTTTCAATTTCTTGTGGCACCAATTTGTAAATTGGGATAGCAACCGG…	yes	contig00540	OtL008-H08			8.60539	-1.9083	-1.79294	2	730	Non-Horn
contig00555_a30	GGAAACGAGGTTAATCATCTGTTGTTAAACACCAACAAGTGCGCTTCCTGTTTAAAATGGCTAGTTCTTCAAGACACGATGCGAATAAAGTTTGCTGTAGCCACCATCCAGATGCTCCCCTCATAGAAGATTATAGAGCAGGAGATCAAATTTGTTCAGAATGTGGTTTGGTAGTCGGCGATCATGTAATAGATGTTGGTTCCGAATGGAGAACATTTAGTAATGAAAAAAATGGTGTAGATCCTTCTCGTGTTGGTGGACCAGAAAACCCACTTTTAGGGGGTTCAGATTTGACAACTATGATAGGCCCCGGGCGAGGTGACGCCTCATTTGATTCGTTTGGTGTTGCTCGTTATCAAAACAGACGTACAATGAGCAGTTCAGATCGTGCTTTAATAA…	yes	contig00555	contig_163			10.2234	-2.47471	-3.38519	1	1108	Non-Horn
contig00588_a31	GCGAATGGCCGGCCGGTGAGGGGCAATTATCAGGCCGCGACTTTTGCGAGTAGAAATTTATAATCTCAAATTTACGGTCCGGCAATTTACGATTGTTTTTTCCGAGCGGCGCCGCAGCGCCACAGGTGAGGATCTAGCGGCGACCACCATTAGATCTTCTTCTTCTTGCGGCCGTCGGAGAAGAAGGAAAAAATCACCAGAACCAGGGGCGGCGGGGGGTGCATCCGGTAGACCGTGCACAAAACTAAAGACCGCCGCTCGGCGCCTKKAGTTCGCGACCAGACGCCAACCGAACATCACAAACCACAGAGATCTACCCGCAAACATGAACGTAGCCGGTGCCGCATCTACCATACTCCTATTCATCTTCATCACCACTACAAATTGTCAAAGGATAAC…	yes	contig00588	contig_220			14.2128	-0.893238	-1.78706	4	1152	Non-Horn
contig00589_a32	GTGTTAAAAAAGAAATGTTTATTATCTCACGATTCACTTGGTACATAATAACTAGGAATAAAAAATAAAATGTAAAGCTACGGAACACTAAATCTTACTACAACTTACTAAAACTCAAAACTTACTTTACAAAATGGAATGAATTGCAAAACGATTATTTATGCTAGGCGATTAATGATGAAGTACATAAATAAGGGGTCGTAACTAACTTATTGGACGGATGAGAGTGAACGGGCCAAGATGGTGACGGTGTCGGGTTCAATAGTGGAGGCATGATCCTCTTCGTTTTTGGATCCCTCCGCGATGGAAGCCGACGGGTCGTCCTGAAGCTCAGCATTGACGTGGAAATTGCTGTCGTATGGCCCGTTTGTCGACTGGTCGATGTCCACGTCTTGCTTC…	yes	contig00589	contig_277			14.3857	-0.844213	-1.72313	4	919	Non-Horn
contig00619_a33	TGAGTATATCATGAGATGTATAAAACAGGTGCGSGAGCAAGTAGCGCTCAGTCAAGTTGAGTTTGAGTCGAGTTGAAGAAATTTTGTGTTCCACGTAATCTAACTTGATTAATAAGTTTTATTAATTTCATCTATTTCAAATTTTGAAATAAATTAAAATGGCTTTAATTCAACCCGACGCCGATATGCAAGTTTTAATCAGGAAGGAATTGAATGAAGATGTTAATACGAGGGACGCTGACCTTCAAACGATGAAGGAATGGTTGGCGAAGCAACCTCATCTTCCTGATACTTGGGATGAGCAAAGAATTATGACCTTTTTGAGAGGATGCAAATTTTCTTTGGAGAAATGTAAAAGGAAATTGGATATGTATTTTACGATGAGAACTGCTTGTCCGG…	yes	contig00619	OtL007-F04			10.6468	-1.36436	-1.83087	4	1223	Non-Horn
contig00634_a34	GGTCGGTCGTCGKGACAACCGAGTCAAACGAGTTTTTTTTTTATCAACTTCAAACTGTAATATCTTTCGACAAAGGCTTAATGCTTTAATTTGTAACAAAAAAAAAACTTTCAACGAGAAGAAATCGAGCACCAACAAGAAGATGGCAAAACACGATCAATTCTCTCATCGTTCATTAATCACCCTGTTCCTAATCGTTTTGATCGCACAAAGTGATGTCGAAGCTAAAAAGCTGAAAGTGGACATCTTCTATTCGCCGATGGATCAAAAATCGGGGGAATTTATCAAAGAATCTGTCTCCGAGATGTCAAAGAATATCTTCGCCGAATTTGTCAGTTTGAATCTTTACCCCATCGCTGCTTGCACGTTTGATGATTCGAAATTGACTTGCGACGGTGG…	yes	contig00634	contig_253			7.80692	-1.1491	-0.832794	1	1129	Non-Horn
contig00641_a35	GGGTCKGTCTCTAGAGTACGCCATGAGCCTGGAGTTGTGAAAAGGGAGTGTGTATTGTTTTGTACCAAAAATTAAACGAAAACCAACTAATTGAATAGAAAATTGAAACAAATTTTCTGAAAGCTAACGTTTAAACAACATGTCTACTGCTGGTTCTAGCGGCTCAGGTAGAGGTAGAGGTGGACAAACAACTGTTGGTGATCAAAAACCGGAAGCGAAAGAAACTAAACCAAACCCGAAGATGTCCAAAGCTTTGGGTACCTCGGCTAAACGCATCCAGAAGGAGTTGGCCGAGATAACTTTGGATCCGCCACCAAATTGCAGCGCAGGTCCGAAGGGCGAAAACTTTTACGAGTGGGTTTCGACTATTTTGGGTCCGCCTGGATCGGTTTATGAGGG…	yes	contig00641	OtP003-H02			11.6753	-1.3753	-2.22724	2	789	Non-Horn
contig00649_a36	GGTCCTCATTAGTACATTCCCGTAAATTACACAAYGAACAAGTCGATATTTCTAATTTCACTYRTAGTGGTTATTTGCCACTCGTACACAATCAAATCGACAGAAAAACATAAACATTTTCCAGTACAATTAAGCCTTCCGYAACAACGCAAATCGTTTCAACGTTTTTATAAGAACCATGTAGAAATAGTTGATTGTCCGGACGGTTACACTTTTAACGTGAAGAAAATGACTTGCCAAATGGACACCATGGTGACGGATTTGGGTTACATCGAGAACAGCTGCCCGAACGATTTTCGAGGAGACGTTCCCGATCCGTTGAACTGCAGGAATTTCATCTCCTGCTACGACGGTGTCGCTTATTTGCAAGTTTGTTCCGCTCATCTATTGTTCAGCGGT…	yes	contig00649	OtL001-A06			12.0103	-1.66033	-2.02364	1	608	Non-Horn
contig00676_a37	GGATAGCTACTTGAAAAAGAATTACTTTACAAGATGCTGCCTCACCACTAATAGAACAACTAATTATATTCCATAATCATGCATTATTAATTTTATTAATGATTACAGTTATAGTTGGTTATCTAATAAGAACTTTATTTTTTAACAAATTTAATTATCGATTTCTATTAGAAAATCAAATAATTGAAATCATTTGAACTATTGCTCCTGCTGTAACATTAATTTTTATTGCCTTACCCTCTTTACAACTTTTATATCTATTAGATGAAATTAATAACCCAATAATTTCCCTAAAATCAATTGGACATCAATGATACTGATCCTATGAATATTCTGATTTCAAAAAATTAGAATTTGATTCTTATATAATCCCTATTAATGAAATAAAATTAAATAGAT…	yes	contig00676	contig_17			10.5523	-1.91721	-2.86577	3	684	Non-Horn
contig00693_a38	GTCCTACAACAACGACAACGTTACGAAGTTTACCAACAAGAAGAAGAATCGTTTTGAGAAAGTTAATTAAACCTCATACAACAAGTACAACGACGAGTACAACTACAACATCAACAACACCAAGCACAACATCAACAACAACAAGTACAGAGCCAACAACAATTAGTGTTACAGAAAAGGAAATTTTAACATCAGAAAAAGTTGGGTTGGAAAAAGAAACTTTGGTAACTGAAAATGAAAGTATACCAACTGAAGCTCAAACAACAATAAATACAAACAAAGGAGATGATGATAAAGAAAAAATAACTCTTCGAAATGAAATATTGGAAACGAAAAAAGTGTTAGTTGATAAAGAAGATGGTGATGATGATAAATCTGARGRRSMTKMKKATWRYGASG…	yes	contig00693	OtP009-E02			9.07662	-2.49794	-0.323115	3	1402	Non-Horn
contig00694_a39	GGTTGACCCCGTTATTGTATTGTCCATTCACCACCCTCCACAACCAAAATGGATGAGTTGCCGCCAGAACAACTCGCAGTCTTGAAGAAAGCTTTTGAAGCATTCGACAGTCAAAAATCAGGAAGCATACCATGTGATATGGTGTCAGATATTCTTCGTCTTATGGGTCAACCATTCGATAAAAAAATCTTGGAAGAACTCATCGATGAAGTAGATGCRGATAAATCTGGAAGATTAGAATTTGAAGAATTCGTAACATTAGCCGCAAAATTCATAGTAGAAGAAGATGATGAAGCCATGCAAAAAGAATTAAAAGAAGCGTTCCGTCTTTATGACAAAGAAGGCAACGGTTACATCAAAACGTCGAGTTTAAAAGAAATTCTAAGGGAGTTAGATGAT…	yes	contig00694	OtP014-G08			9.85361	-0.936812	-1.64153	4	721	Non-Horn
contig00697_a40	GGGTTCGCATCGACATCGTCGTCGACGTCGAGTTCGCGTCGTTTTTACAGCCTTTCGAGCSAGTCGCGATTTTACGGTCGGTTCGTGACGGTCGTTTACAACGTCTATTCAAGCGATATTCGTACCCGTTGCATATTGTACACTTTGTTCAATCAAAAGATAATCTTTATTAAAACACAATTGATTTTTAAASAARTTTAAGACATTTAGATAAATTSYATTAAATTGTATTTGGAGTAAATTGAGATGAAAAAGTGTGTTGTTTTGGATGCGAATTTTGGAAATTTATTMACTAGGTGATCTTCTTTGTGTGTATCACAATTKCATCCATCATCGTCCCAATAATATGATGATGAACCGTAAGAAATATTAAGTGGAGAAGATTGAGAGAGCGAAAAA…	yes	contig00697	OtP003-F10			9.0352	-3.9748	-1.72085	3	963	Non-Horn
contig00730_a41	CTTGATGATAATTATATTTATTATAGTAGTTGAAATTGGATATGTTAATTTCTTTAATTCAAGTTAAATACGTCTTAATTTTTCGTTTACAGTAAGCACCTTATGTGTTGATGAATCATGTAACAAAACATTACCTAAAATATAGTGGTTAAGAACCAGAACGCATTTACATAATTATCATTTTATTTACTCACGTTTTTAAAATATGTACAAAATCACTATACCAATTCGTTTTTTAAATGCAATTGTGATTCAAAACCAAGGAATAATTGAGCTTTAACTGAAGCAAAATTATCCTCTCCATTAAAATTCGTCGAATTTAATAAAAAATCAACGAACCTTCATAACYGAYGAAGGTTTGCTATTTAAATTTATTAAATTCAAGTTCGTCAATAACGA…	yes	contig00730	OtL010-G01			8.34396	-2.39019	-2.28383	1	879	Non-Horn
contig00738_a42	AAAATTTTATCACATTTCTGTGCAGCATAACTCGCGTGACGTGTAAAGTGCCAACAATTCAAAAATAGCGTAAAAACYGAAYACTAGGGATTCGAAAAAACATTAATAACCGGTTAGAAAATATGACCGAAAACAAACAAGGAATGAGGGCTTTAATTCTCGTTGGTGGCTATGGTACTCGATTGAGACCATTAACCCTTAGCAGGCCAAAACCTCTCGTTGAATTTGCAAATAAACCTATATTATTACACCAAATTGAAGCTTTGGTTAAAGCCGGAGTTACAGAAGTGATTTTAGCCGTTTCGTACAGGGCCGAGCAAATGGAAGATGAATTATCCCAAGAAGCAAAGAAGTTGGGTATAAACGTTATTTTTTCGCACGAATCTGAACCACTTGGAA…	yes	contig00738	OtL016-E08			10.2016	-2.65081	-2.58397	3	737	Non-Horn
contig00748_b863	CTCACCACGACCAAAATTATTAATTATATTTGATTAAATAAACGTAAGCAACATTACAATTTTTTATTAAACGTCAAATTTTTAAGATTTGTCAATAAATCATATAATATCAGAAATGGTTTGTGTTATAAAATATTTAAGGGTTAGAAGTCCAGTTGGGCCATCTTTGAATGGTTGCGAAGAGTGTGTTTCCTGGACAAGCTGTAGCAGCTCCTTGACGATGTCCCATTAATCTATAATTCCTTGCAATTTGTCCTTGAGCGACACCGCAAGCGATAAGTTGTTGAGCGGCGTTTTGAGCGGCAGCGGTTGGGTTACCGGAAGTAAAGGTTCCAATGAAAGCAATTCCAATACTTCTTGAATTGAAGTTAACGGTGTGAGCTCCTTGTCTGTTCCATC…	yes	contig00748	contig_82	OtL009-D02		9.25897	-1.77828	-1.95968	3.5	723	Non-Horn
contig00751_a43	ACTAATATTCCTGGTTTTTGGCCGGGTGATAACTCAAAATTTGGTTTGATTTCGTTCCACGATTCATCCCACATTTCAAAACGCGATTATAACGATGCGGAAGAATCGAAAGAAGCCGTTCATCGACAAGGAATTTTAGCAAGTTTTTCTTGGTTAAACTCCCAAGCTAAYAATTTAGGTTTTACAACATTCAACGAACTCACTTATCCACTTTTTACTCAAACGATTCTCACAAACGGACAACAATTTTCTTTCTATCTTTACCAATTAAACACTCTTCTTATTCATTCTAATTACGTCAAAGATAACCCGCAAAAAAATGTTTGTTATGCCACTCCAGAATTAAAACTCTACGAAGAAATCGTTGATGGAAAATTAATCGGTTTTAACGACGATGTT…	yes	contig00751	OtL006-C09			9.30683	-2.19737	-2.39457	3	680	Non-Horn
contig00762_a44	TTTTGTCTTTCAAAACACATTTATTCAAGTATAATTCATGTAATAATAAACAGTCGCCTTATTTACAAATTTTTCGCTAACTAGACACGAGTTTCCACTGGACAAAGAAGTTACAAACTAATTGTAAGAAGTAGTTTTTACACTTATAGAAAATAAATGAATAAATTTAATTAATATTTATCAATCCCACTTCGTCACCGAAGTCGCCGCTGAGTATGGCGTTGATTATATAGAGTAAAGATCTTGTGATTTTACAAATTTTACAATAATAATAAAAGATAATACGAGATTTTTTTCCGAATCTCGAATTTAATGGCCAGACTTACCAGGTCGGTACCTGTCTAAGGTCGAGTAGTTGTGTGGGAAAATCGGTCTGGGTGAGTAGTCGTAAGTATCGCG…	yes	contig00762	OtL015-C02			10.7025	-0.981759	-2.08682	3	614	Non-Horn
contig00767_a45	GGTCTTCATTCTGTGTGCAGTATAAAAGGACATGTTGTTATTACTTGKSAACATATTCTATTTAGTTTGCCGATAGTGATATTAATTCAATAATATTAAAAATACAATAATAATGGGATTAAAATTATTTTTAATACTTTCCATTGTATTTACAGTTGGKATCGCAGAAAAGAGGTATAAAGTTTGCGGATCAGCTTTGGCTGRCCTAGTGGCTTGTATATGTGAGTCGACTAAACCTCTTGGAAAGATTASAAGTATTGATGATAACAAAARCATAAAAAATATGGAAGAGGTTTATTCCCTAGAAAAAGGTATTGTTGATGAATGTTGTAKACAATCATGTACCAGAGAACAAATTGAGGAGTACTGCCTAGTCGTGAGCACGAGAGAGTGTTGACA…	yes	contig00767	OtP009-C11			11.5531	-1.986	-2.43657	3	767	Non-Horn
contig00787_a46	GAGTTTCTTGGTAACGTTCGCGGTGGAAGTGTATAAACGAGCTTAAGTGAGTTGAAGATGTCTTCATTTTGGTCCTTTTACCAAATATTAATATTCCTGGTTATATTTCAATTTCCAAGAGGTGAGAGTTATTCAAGACAATATAGAATACTTTCWGCGCTAACATCTCCACAAATTTCGTCCCTCAGTTTACCGARTGGAAAATTTGTGCGCCAAATGTGGACAAAATGCTCAATGTGCTATTGTTGATGGTAGACCGGTTTGTTCCTGTTTAAGAAGTCACATAGGAGACCCTCTTTCATCATGTAAAAGAGTTGAATGTTTAAGTGACTACGAATGTGGTCCTCATCAAATGTGCAAAAATGATAAATGCGTTAATCCATGTGATGGAGTCTGCGG…	yes	contig00787	OtL004-F05			9.42863	-1.83319	-0.969653	3	1047	Non-Horn
contig00795_a47	TAACCTTTGTTGTTCTTCTTCGCGCTGTTGTCGCTCGCGTTCGATTCGTTCTTCTTCCGCTATACGTTGACGTTCCATTTCAGCTTGTCTTTCAGCCTCTTCACGTGCCAAACGTCTTCGTTCAGCCAAAGCGGCTTTAGCTTCTTCTTCAGTATTTATACGCACTTTTGTCATTGAAGTTGTCATTTCTGATGATTCACCAAAATCAATTGTTGATGAACTCATTGTACCATTTTCAATTTTTTCATCAGTTTGTTGTTGTTTAACAGGTGTTTCTAATTGTTTTTCTGATTGCTTTTCAGATTGTTTATCAGACAATTTATCAGATTGTTTTTCAGATTGTTTATCAGTTTGTTTTTCGGATTGATTTTCAAGTTCTTTATCAGATTGTTTTTCGGG…	yes	contig00795	contig_399			9.76523	-1.47225	-0.657353	4	926	Non-Horn
contig00809_a48	GATTTGACATAACCTTTAAGGTTAAGAGAATTCGCTAAATKAGTCAAGGAAGAATTGCCGGTAAAAATAGAAAGAAAACAAAGATAAGGGAAARTTAACAAAGTATTTATTAACAGAATGGATGCAGGCGGAGACCGCATCTATTCAACACAACTTGCCGTTATTCGAGAAGTATATGACAGCGAATTTGCTCATGATCGTTTTGCTCAGGAACTTGAAAAAGCTTTAGAAGCTCATTGTAATATTATTGTTATTGAACCTAATCCCTTGGGAGATGAAACGGCTCGTTGGATCACTGTGGGCAATTGTTTACATAAAACTGCAGTTGTATCTGGTTTAGCATCAATTGTAACAGGTTTTGTTTGGCCTGATTGTGTATATACTTATTTGCCGTTTACT…	yes	contig00809	OtL020-E03			9.09417	-2.02255	-2.03118	3	626	Non-Horn
contig00849_a49	AAAGCATGTGGGATGGAGATTCCTTCCAAATCATATTAGAGGCAAGGCTCATATTCAAATGATGGACAGTTTGGAAGAAAGTTTCCAAATTACTGTTAAAATCCTTCGCGAAAATATGCGCTTAGCTGAAGAAAAGAAGATGATCGAATGGAGTCGCATGCAGAGAAATAGCCGCAAATTTCATCAACGCAACGAACCAGAAAGTCATTGTAATATGTGCGATTTGAAGTTTATGGGGAAAATTATTGCCCATAGAAAAACTGAAGGTCATCAACGCCTTAAGAGATTTTTACATCCCAACTGYGACATTTGCAACTTGGAATTTCCGTCTCGTATGGAATGGGTTGAACATAGATTCACTCCAGATCATTTATTTAGTTTGAAAGAGAAACTAAAYTC…	yes	contig00849	OtP011-B12			11.8292	-2.22615	-1.47869	4	1213	Non-Horn
contig00850_a50	GGTTCCAGTCGACGGTCAAGCGTCTTCTTCCACAAGCGTACGGTTTTTCTGTGTACGYAATTCCGTACAATATTCAACTAAAAWAAGAAAAGCAGTTTCCTTCTTTTTCTTAAAAAAAAAAAAGTTGAGTCATAAAATGGCAAATAGAAGATTCGGAGGTGGACCTAACAGAGGTAGTCGCGGTTTTCCTCAAAACGCGAACGTAAATCCTTGGCAGGGAAACAGTGGCCCCACGGCGGGGGTTAACTCAATGGGCAATCCCAATTTGCAAACGCAGCTCGCCCTCGCTTTGAGTAGCTTACTTCAACCGCAACAAGTGAACGATCCTCCATCTTTACTCTCGCTTAACACCTCGTCGAGAAATTTCAATAACCAAGACAACTATTCCAATCGCCTCGG…	yes	contig00850	OtP020-C04			12.1034	-1.47332	-2.5711	4	447	Non-Horn
contig00868_a51	CTTGTTGTTGCAGGTTGTTGAGTCGTTTTCTCAGTAAGATTTTTACTGAACCAATTTGGTCTGGGTTTTTCATTTCGATTATTCGTTTACCTTCGAAAAATTCGCTTGGTTTGTAATCTTTTTCGCCATCATATAAAACAACAACTTCCTTTTCAACAGGTTCTAATTTTAATTCTTCTTGTATCTTATCTTGCATCGCTTTAGTTTCTTCGATTACTTTTTTATAACATGTTGGGCATAAAACCCCAACTTCGTGATCATCACCACATGTGTTACAAGTTCGGAGCGTATTCTTTGGTAACAAAATTTTTAAGTTATAGTCAGGACTTCCATATTTTCTTTTTAATCGCTTCTCAATCGATCTCCTACTTTTKGGTACTGCCCACAACCAACCATCTC…	yes	contig00868	OtL005-H12			9.80411	-2.59743	-2.19053	0	894	Non-Horn
contig00890_a52	AAATGAAAAAAACAAATCTGTGCCAAGCCTTTTTTTTAAATAAAGGCTCCACTTTTATTTTTTGCCAAGTGCTTTTTGAGTTTGCGCCGTTTTAGCTTTAACAGCATCCTCCTTGGCTTTCTTATCAGCTTCCCTCCTTTTTTGCRCCTCCTCACGTTGTTGCTTAATTATTGCAAGTCTTGCTAAATCCGCCCTAGCTTGATCTGTTTTACCTTCGGCGTGAAGCTTTTGGTAATGTGCTTGAGCCCTTTGTTTCTCAATTTCTTCGCGTTCCCTCCTGGATAATTGTGGTTTTTCTGGGGGTACRTCCACTGTTAAYGTGGTAAGTTTTTTATTCTTCTTTTGTACACGATTTGGATTTTCTATTTCTATTAAATTTGAAACACCCTTCGCTTTCTT…	yes	contig00890	OtP005-E11			11.4881	-1.72	-2.17511	1	737	Non-Horn
contig00896_a53	AAATTTACCGAATTGAGTATTCAACCTCAGCMACTTTTGGRATCTGTGATGTCAACCAAACAATTTGTTACCACTTCTCCATCCGAAGAAGATGATAATATAAAAGATACAGCCACAGAGGATGATTTGATAACATTATTAAATGAATCCGGTTTACGGTTCTCTATTACAGCTTTACCTGCTGCAGATGATGTTGTAAATACTTGCTTTAGTTTTTAATGATAAACTATCAACTACCATTCTTTCTTCTGGCACTGTTTATGAAGAAACTAAAATACAATTATTAAAAAAAGACAGTTAAAATAATGTCATTAACTAAGTAATATGTAATTAAGAACTAAAAAGAATTAAGATTAAGTTTGTATTATGAATATGTWTTAYCAAAAAATTAGCTACTAA…	yes	contig00896	OtL013-H06			9.31891	-3.18783	-1.60647	4	418	Non-Horn
contig00899_a54	TTTCAAATAAGAAATATTCAATCCTTCGCTGAATAACCCCTTTGCAAATTTCTTCTTATATAAATRTCGTAATCACGAACGATCCGAGCTACGATATCCGACGTGGAAACTCCCTCAGTACGTGTTGTTGGCAAAAACATTCCTTTCGCTTTTAACGGGCCATAAATATCATCGGTTGTTTCAGAACTGTAWGGAATATCATCGTGTGCGACGAAATCTATTTTATTTTCGGTTAAAAATTCCTCGCTATGCTCCCAAGGTGCGTTACGGAGGACTTCGTCGACGTAACGACAATGTTTTACTGAATTATAACGTTCRTCTTCGTCCATTACAGTACGGCCTTTCATTTTATGTAATAGCTCATCATTGCAAACTCCGACTATCAAATAGATGTTAGGG…	yes	contig00899	contig_446			7.80822	-2.1036	-2.07736	1	758	Non-Horn
contig00920_a55	AACCAACTTTGAATTTGATCGCTTAATTCTTCAGCATCTTTAAATACAAAGCCGTTTTCTTCATGTTTAACTAATTCGTATAAAGAKTTAAAATCATATGCACAAACTGGAATTCCACAACCAAACATATCAACAACTTTCATTGGTAAATCGAGCCCACTTGAACTSGTATGAAGAGAAACTCMTAAATCAGCTGAAGCTATTATTTTTGGATAATMTTCAGCTTCTAACCATGGGGTTATTATTKTTATGTGTTTCAATTCAAGTTGATTTATTTTGTTTAGATAATAAGATTTTAGTGGACCTTTTCCTGTTATAATACATATTAAATTTGGTAATTGCTTTATGTTATCTTSTKTAATGTGGTTTTCGTAATTTATTAACGCTTTTAGTAAAATA…	yes	contig00920	OtP004-A12			10.8534	-1.77466	-1.67151	2	552	Non-Horn
contig00948_a56	TAATTCACAGTCAAATTATTAAACAAAAATCATTTATAAATAATTCCCTTTAAAACGCAACGTTCGTAATTTTATTTTTTTGAAGTTGGCTAAACGCGTACCAACAAAARACTGTTAAAATCACGTTTTGCCGGTTTCTCACATCACACGGCGTGGTCTCATTTAACATTATCGAAATATCCGAAAATGAATAGCATCGTAAGAGCCGCTTTGCGTATAAACGGTTTTAGGCCGCTTTTGAGTTGTACGAAAACGTCGGTCTATGCGAAAAATGCCGTTCAACAGCGACAGCTCGCCCGGAATTTTTGGTACATGTGCAACGTGCGAAACGATCACTCCACCGTTTCTTCGACCGTTTTGAAGAGTCCAAGCGAAATTTGTAGCTGCGGGTGCGGAAAA…	yes	contig00948	contig_240			10.6491	-1.86173	-1.9078	3	1106	Non-Horn
contig00955_a57	ATGTTCCTTTTATTTTTCATTTATTACTATTAAACAAAAGAAGTTACTTACCCTCCTACTTTTTCTCATTTTTCACAGAAAACATACGTAATACTTTCAGTTTAAAACATTATTCTTAACTCTTAACTACTTAACGCGCATCGGGTGCGCCCCATATTTGTATATAAATAGTCACAAAATTGTAATTTCTAAGTTTATAAAGATCTGTAAATTAATTATAACCATTAAAAATTAAAATAAAATAATTAAAATGGAAAAACGTTTTTGTTTTTGTTTATAAAGTCTTCTGAAGACACAATGTATCCCTCAACAATTGATTTCTTAACGCCCRCAAAGCGTTTAAAACGTTTTCTTGTTGATTCGCTTTATTTCCTAACCACGTGGCAACGGAATGTAACT…	yes	contig00955	OtP008-E03			9.55737	-1.76482	-1.65784	2	614	Non-Horn
contig00965_a58	CTAAAGGAGCGGCTACACTACCCGGATCCGCGCCGATCAGATCCGCGCAGAAAGTATTCCGATGGAATGCTCCCTGTGTTTTCAAATGTACCCGGCTACACTGTTCCGCTCCGCGTCGAATCGACCGTCCGACCGGCCGGATAGATCATCGACAGGGCATCCATCCGTACATTCGGACGTCGATCGGCTGTTATCGCATACCCTCGTGGATTTTSGTAGCACATGGCGATCTTCGTCCCTTAAAGGACTGTTTTGTCACAGGTGTTTTTTAGAACGCGTATTTTACAAATAATGAAGTCTCTGTTAATTGCGCACTTCGTTTAAACTATTGCTTATGGTTTTTGGTTATTTTATAAAAAAAATATGGATGACGAAATACTTATTGTGTTAGTGCAACAA…	yes	contig00965	OtP001-E02			10.5174	-0.985428	-1.42813	3	530	Non-Horn
contig00989_a59	CCGCAATTAATGTTGAGACGAACTGAAGTGTGGTTGAAAATGTTGACAAATTGGGTGGCGCTTTGCATGTATTCTTATTTAAAGAGTACGCGGGATCCTCATTGTTCCTTTTATTCAAAGCGATAAAACATCAAATTGAAAAGGTTTAGTGGACGCGATTACTCACGACGCAAGATATTCGTTATCGGAGGAACGGCTTTTGAGAGAACAAATCGAACATAATGTTGTGACGTTGCACATCGTCCAAGATGACCTTGATGAGAAGATTCAGTGTAAAGTCTTGGATTGTGATACGATAAGTCAGGTGAAATCGAAGATTTTAGACGCTTTATTCAAAAACACTCCGTTTTCAATGAGACCATCAATACACGAAGTTGATTTGGAGTGGCGTCACGGAAG…	yes	contig00989	contig_306			11.1914	-2.05206	-1.13496	3	1718	Non-Horn
contig00998_a60	GCGATTAAAAATATTTAGTTTTATTCAAATTAAAGAGATATAGCAAGAAATGTTTGAATTAAATATCATTTAATTTAATAAAGATTAAGTTATAAACTGTTTTTAAATTAAGGCAATTCATTCAACTTCATCTGTTCTTACAGGATGAAGTAAGGGAACAACAGACTTTAAATTTGCATCTCTCGAACAAGCTTTTCTCATATCATAAGCATCTTCATCAGGATCTCCAGAGTAATATTCCAAAACAGTTCGATAAACAATATACCCCAAATTTTTATACATATTTATAGCTACCGAATTACTAACACGAACAAAAAGGTCCACAAAATAAGCCCTTTTCTTCTCAGAAACCTCTTCTAAATAACTCATAAGTGATCCGGCAATTCCTAACCTTCGAAA…	yes	contig00998	OtP002-B04			8.59224	-2.0761	-1.64502	3	701	Non-Horn
contig01022_a61	GGGACTTTTTCGCAKGTAGTCCTGATTGGCGGTGGCCCCAGCGCCTGGCTGCCATGTTTTATTAAAAATTGCGGGGTGTGTTTGTGATTTTAAGACACTACAACAACATCCCCAAAGACAGGTCTACAATGGGGGTCTGCCGCAAAACTATTACGACGGACCGGTGTAGCGAATTCTAAGAAGAAACCAATACGAACGACCCAAGACATTTCTAAAAACAACTATAACCTAACTAAATCAAAATCAATTTCTCTCTACCTACTTTTTGGTTTTTTGTGATGCATTCAGCTACTCGTTATAATGYACCATTGTAAACGAGTCGTCCTGACGGAATCGAGCAAGCGAGTGGCCCCCGGAAACAAGAAACTACGCAACGCACCCCATTACAGCCTCAACTAA…	yes	contig01022	contig_398			9.68826	-1.31661	-0.896927	3	723	Non-Horn
contig01078_a62	CCCGCACGAGTATGGCGATAAAGCAATTAAACGCGAATCATCGTTTAATTTTAAGTGGAACTCCGATACAAAATAACGTTTTAGAATTATGGAGTCTTTTCGATTTTTTAATGCCGGGATTTTTGGGAACGGAGAAASMATTTACCGCGAGATATTCTCGCCCAATTTTAGCCAGCCGCGACCCGAAATGTTCCCCGAAAGAACAAGAAGCGGGGGCTTTGGCSATGGAAGCTTTGCATCGACAAGTTTTACCGTTTTTATTACGCCGAATGAAAGAGGACGTTTTAGATGATTTACCCCCGAAAATAACGCAAGATTACTATTGCGAATYATCACCGTTACAAGAATTGTTATACGACGATTTCTCGAAATCGCCCGCTCAYCAAACGTTGGAAGAAT…	yes	contig01078	OtL018-B12			10.4483	-0.817681	-1.705	4	1126	Non-Horn
contig01135_a63	TTTTRATCGAAGCGACTTTAGACGATTATCAACACAATTCGATCAGTTTTGGGGTTGAAACGAATTATTTAGACTGGAATACATCGTTCCCCGCAATCTTTATCTGCGAAAGCGATAATGCAAAGAAAATCTCATCATTTGCCGATAAGTTYTAAGMSKCKTAATCTCAATTCGTAGTTAAAAATGTTTCATTTTTAGGACTTACGGTGACCCGAGRGATTATAATTTARAMSAAATTCATCAARRAAATCGTTTTTTATAAAGGCTTATCGTTCTATACACTACAAATTTGCGACAAATCCAACCCGGCGTGCYTAAAARAGAATTTCGAAGAGATTAATCGATTGGTTCGAAGCAAATGCGAGGAAATCGTTAAAAATTGCGAATGGAATCGGAGAA…	yes	contig01135	OtL010-C02			12.4971	-1.17688	-0.732499	3	831	Non-Horn
contig01136_a64	ATTACATCTTGGTCTTTAAAACATTATTTTGTTTATATATAATTTTTTCCAATTTTGTTTTTTAATAAGTATAACTAGCGGGATCAATGCCGTGTTTCTTCACTTCCGCATCGATCCAATCCCTAAATAATCCAACGTTTGCGTAAACTCCMGGAACGTTATTTTCCCCACATCCAAYTCCCCAAGCAACAATACCCGCGTGTTGATACCTTCCTTTTAATCCCGGAATTGGACAAACCAACGGACTTCCTCCATCCCCTTTGCAAGTATCTTTTCCTGCTTCACCCCCAGCACAAATAAAACTATTGTGTAATTTGAAGAACGCCCCCAAACGAGTCGTTCTTAAGCTAGTTTCGCACTTATTCCTTTCGACAATTGGTAATTCGATTTTTTTCAAAA…	yes	contig01136	contig_13			12.6359	-1.51753	-2.00421	4	1407	Non-Horn
contig01141_a65	GGAATSRATAGAGGTCGTCATGTCAATTGATGAACGRAATTTTCGTTCTGCTTATTACGAAAAAGTTGGTTTTAAAAGTGTAGAAGAGAAGAAATCKTTAGAAATTCTTCTTTAAAAGATCAACAACTGGAATGTTCGAAATTAAAACTATTTTGTTTAAGGTTTTCGGTGACCGCAAGTTACCGAAAACGAGTGTGGAAACTTCTTTTAGGTGTTTTGCCAATGAATTCGGAATGTCACGAATTCGTAATGGATCAACGCCGACAAGAATACCATGATTTGCTTAGAGCTTTACAAGTTATGCGAATGATTGATTCAACAACACCGAAACCCCAACAATTTTTTGCAATGTGGTTGCTACAATTTGGTAAAATGCACTCAAAAACGAATATAAACGTG…	yes	contig01141	OtL008-G03			8.934	-2.24471	-1.3715	3	909	Non-Horn
contig01153_a66	AAAACAAATAACACTACAAAATTAAAATGTCGAACAGCTGACTTTTTRRGKTAAAAATTCAATGCAATCGTGAACACTCCGTGAACCAAAAAAAAATAACTAAAATAAATATGCTTTTAAAATGCATGCAAACGATTCACCATTTCATTAAAATACCCCAAACACACCAAAACAGTCGTCAATTATGGCATTGGGTCAATTTGACATTTAACAGAGTTGACCAAGAAAGATTGAGTAAATTTGGACCGGATAGAGTTTGTGCGGAATGGATTTTAAGAAACGGGTGGGAAGGTTAAATTTGTTGGCGTAAAAGACTACTTATTTGATTATAACTTATTACCACCTGAGGGAACAACACTACAGATAAAAGAAGTAGATGCGTCCTCATCCAGTATTATG…	yes	contig01153	OtL020-D07			10.325	-2.54666	-3.50912	2	721	Non-Horn
contig01156_a67	GAACTGCTTTATCATTATTTATTAATTATTCCTTTAGGTTACACACCATGAATACCTGACAAATTTATATTAATAATAAAAAAATGAACTCCTAAAAAAATTATGACAAAAAAGTTTWAATCTACTTCTTCTTCTCATCCTTATCATCCTTCTTTTTCTCCTTCAAGTTCCCAACAGCTTGTCGAATCGTCTCCGATTGTGGATCAACCCCTGGTAGATTTTCCAAAACGCTTTGGAGAAAAGCCGGATCATTCATCACCTCAGAATAATCCTCATCACCCTCGACATCCATAGCTTCCTCCTTTTTACTACCAGAGGTAGTTTCTTGAGCATCTTGCATCGACATCTGCATTGCAAAAGCAATTTGCTCATCCTCCGTCATATTTGCAAAATCAACAG…	yes	contig01156	OtP001-H05			9.19952	-3.27657	-1.02328	4	601	Non-Horn
contig01165_a68	GGACACGTCATGTGGATTTGACGCTTGCCGCATGATTCTGGTCCCTACAAAGTGATGAAATGGGCTGTAATAAGAATATAAGTGATTTCGGTGCGTTAAGAACTAAATATCCTTAGCGATGGAGAAAAAGGAGCTCTTCTACCGCCTGGTTTTACTCCTTTTACACGCGGTGGTCGATTTATTCGACTTTATTCGTTATGCCTGGGTGTACCTGCGGTTGAAGATCTCCGATTTTCGCTTGAAATACGCTGAAATACGAAGTTTTGAAGCTCAAAYTAGGAAGCTAAATAAAYTACCAAAGCATTTAACMGTGCTTCTTGGTGYTGAAGAACCAAGCATCAAAGATTTAGCTAATTTTATTTTTTGGTCTGTCAGTGTTGGAATTCCTTATATTAGTTT…	yes	contig01165	OtL015-E05			8.61275	-2.20234	-2.67627	1	960	Non-Horn
contig01173_a69	GTAAAAATSATTTTTAAAACGTGCTTTAATTTGACACAWAAACATCGAAAAAAGTTCGGGTTTTTTTCTAAAAAAAAGTCCAAATACATGTTTTTGGTGAAGTTTTAGTATGGGAGTGAATTCTATCGAAACCAATCGTTTGTTCCGTCTCTACGTAAGATTGCCTATTAAAATCGAATCGGAAGCTCAAATTAGGGAGCTTCATGAAGAAATTGTAAAAGTTTGGCTGCCGAGGCAGAAATCTCGCCGTTGGTGCATCATTGGTTTTAACGATACCGATACGCTTAAAAAAGCGCTCGTTGCTATTAAACGTAAAAAAATAAACGAAAAGAAAGTCGTTGTACGAGAATACAAAGTTAAAAATATARAATAAACAAAATTAAGATAATCAAGATAATC…	yes	contig01173	OtL018-E08			11.4065	-2.2578	-2.37137	2	888	Non-Horn
contig01199_a70	TTTTATTTTAGACATAAATACATTCATCAAAATTAATTTTCCACCTTGCCTTGCTTTTTTTCTTTTAAAATTAATTTCCTACCTAAAAAATCATAGGCAGAATTACTCAAACAAGAATCATCTTGATCAGAATCAGAACTAGCATTAGAACTGGAATCATTGTAACAACCCAAGCCAGGCAAAATACCAATACATGTTAATTTATCCACTTCTTTAGTTGAATCATGAYCTCTTTTTGTYCCATGTGGGTTTGCTTCATCTTTTTTAGATTCATCTTTTCGCTGACTCTTTTCACATTTATTATGATGAGTTRGTTTATTGCTTTCTTCTATTTCATCGTGTTTTCGCTTGATTGCTTCAGTTTTTTTAACAACCACTCCTTTTAATAACTTGGTTTGA…	yes	contig01199	OtP018-F11			9.48854	-1.93312	-2.27182	0	920	Non-Horn
contig01227_a71	GGGGAGCAACGAATACTCTCAAAAACACAGAGTTGTCAACAAAAGACGTTACGGGCAAAAGTGACCGTTTTCCCCCTTCGCGAATTCATGGTACAAACGTGTTTAAGCCGCCGCGTGTGCCCCAAGTGACACAGTGAGCCCCGCGCTATTCGGTGTCAAGTTAAATTATGAAGAGACGCAATGCTGAGTTCGGAAAAATGAGAAGACCCGTGAAACGGACCAAGATCGAGGGAATATACGGCAGTGCTTTCCTGTACGTGAAGTTGTTAGTGTTGTGGGTATTGGTAATACTAGCAGACTTCATCCTCGAGTTTCGTTTCGAATTCTTATGGCCGTTTTACCTATTAATTCGGTCGGTATACGACTCGTTTAGATACCAAGGTCTGGCGTTTTCGGTGT…	yes	contig01227	contig_310			9.409	-1.8055	-2.19242	1	1241	Non-Horn
contig01251_a72	ACAGATAGTAAACATAACCTTCATTTGTAWAAAYSMAATTTTTTCTTATTCAAAGAACGATGTCTGTAAATTCTCAAAATGAGTATAAATTAAAAAGCCCCCCTGATGATACGATATCTTCSGTGAAATTCGGCCCGAACACCAATCAATTTTTGTTGGTAAGTTCGTGGGATTCGGGAGTGAGGTTATACGATGTCCAAACGAATACTTTAAGACATAAATATCAACATAACGGCCCCGTTTTAGATTGCTGTTTTACGGATGCTGTTCATTCTTATAGTGGAGGTTTGGATAATACCCTAAAAATGTTCGATTTTAATACAACAACAGAAGTAACCGTTGGTTCACATAACCAAGCGATTCGATGTGTTGAGTATTGTTCAGAAGTTAATGGTATTT…	yes	contig01251	OtL001-H05			9.0915	-2.67826	-1.86341	3	1032	Non-Horn
contig01323_a73	GGTAGTAGTAAATAAGATAATTTACAACCACTAGGTTGTGTTTACGTACGGTTTTTTCGGCATTTTTGGCTGATTTTCCCGTAAATCTAATCGTTTTTTGTATGTTGTAGTGACCAAAAGTGTTCCAGAAACTGTTTTAAGTCAGAAAAATGGGCAACATTCACACCGTCGGACCCAATGAGGCTCTCATCGTATCAGGTGGTTGTTGTGGATCGACGAAACGCGTCACGACGGTTGGGGGATGGGCTTGGGCTTGGTGGTTGGTTACGGACGTCCAAAAACTATCTCTTGAGGTGATGACTTTAAATCCGATGTGCGAAACCGTCGAAACGGCCCAAGGCGTCCCTTTGACAGTCACCGGGGTCGCCCAGTGCAAAATAATGAAGGCTGATGAGCTGT…	yes	contig01323	contig_337			9.71205	-2.30423	-2.14039	1	1843	Non-Horn
contig01337_a74	GGAGTTTGACACTKCTACAAAATCCCTTTTCCGCCACACATCTCACGATGGCTCGAGGCCCTAAAAAACATTTGAAGCGTTTAAATGCGCCAAAAGCATGGATGTTGGATAAATTGGGGGGTGTTTTCGCCCCTCGCCCATCAACTGGGCCCCACAAACTGCGTGAATCACTCCCATTGGTGATTTTCTTAAGAAATCGTCTAAAGTAWGGCTTTAMCCAATAGTGAAGTTACGAAAATTGTTATGCAAAGATTGATTAAGGTTGATGGTAAAGTTAGGACTGATCCTAATTATCCAGCTGGGTTCATGGATGTTATTACCATTGCGAARACTGGAGAATTCTTCCGTTTAATTTATGATGTAAAAGGAAGGTTTACAATCCATAGAATCACCGCTGAA…	yes	contig01337	OtL006-D09			13.4863	-2.38583	-2.52572	4	863	Non-Horn
contig01339_a75	TAGACTAGTCGTCCAGTTTATCATCAACTTTTTGCTTTTTAATTGACGTTTACATCTTCAACGTCATGTTTAGTCGTCTTCTCTTCTTTTATTTATCTCCCATTTATTTAATTCTTTTTACGTAATGTGTGGATGTGTTTTTTATTTACAAGTTCTCGCACCGCTCCTGTATGCAATATCACCGCTTCCTATGTACAGTTTTTAAAATTTAATAAAAGAAACAGCGCCCGAACGCGCGCGTACCTCCCTCGGGAGCCCCACCATCGGCCACAATGCACACACAAGTGATAATCACATATTCAATAAATAATAGCTAGGTATAAAATAACATCATAACAAAACGACATCTTAACTGGATTCATACTTTTTCTTCGTTTTATATCCGTTTCGATTCTTCTT…	yes	contig01339	OtL005-H04			10.5451	-2.13076	-2.37539	3	798	Non-Horn
contig01393_a76	GGGACAACGTTGCCAAACTTAGGAACGGGGAGTTGAGCTGAAAATAAGCATTGTGCACGGTAGCGCCCTCTGTTCGTATAAAACCCACTGTTCCCGGCGTTCTGGGCCCCACTTCTTGTTGATTAACTCGAAGGCAAGTTATTTGTATCACCAGAATGGCGGACCTCAGTGCCAAGGATGTCGAAAGGGCGCAATTCGTTTTTTCCATTTATGACTTCGAAGGAAACGGYCAAATCGATGCCGTAAATCTTGGGGATTGCCTTCGTGCCCTTAATCAAAACCCAACCTTGGCTACCATCGAGAAATTAGGAGGAACCAAAAAGAAAAACGAAAAGAAAATGAAATTGGACGAATTCTTACCAATCTACAGCCAAGTTAAGAAAGACAAAGATCAAGGTT…	yes	contig01393	contig_125			11.7769	-0.528512	-1.60634	4	834	Non-Horn
contig01412_a77	ATTTTAAGCACAAAACTATTAGGAAAACGTCCAAATGTAAAAGTAAAATCAGTGACAATAATACATAGTCAAACAACGGAAACTGTAAGACTTCCTGATGTCGATGGGCAAGTAACGGTTCATCCCCCGCTACGTTCAAAGTTGCCCTTAAAAAGAAAAGTAAGAAATGGTAAAAAATTGGGAAGAAAACCGGCGGTTAAAAAAGAAGCTCAAAATAATAATAATAATATAAATAGTCCAACTAAAAAAGGTTCGCCTAAGAAGAAAATGCGAGTTTCCGCGGCAGTTAGCGCGGAGGAATCGCGAAAAAAAACGGGTGATACAACCGCAGTGATTGAAATCCCACCAAGTAAAGTAAAAAAATCGTCAGTTAGCCGAAGAAAAACCAAGAAAAAGAAA…	yes	contig01412	contig_124			8.69856	-2.21778	-2.26043	2	1624	Non-Horn
contig01426_a78	GGAAGTGATTCCCAACTGTCATTTGAGAGTTGACGTTTGACAACAGCTATCATTTTATTAATTCTGATAAAATGGCTTTAATATTCAGGCTTCATCAAAACCGACRACTTCTCAAATATGTTGCGGCGAATAAAAGTTTGATTCTTTTGGCACGACCAGTTACAATAAAAGCACAACCGGCACCTCCTCAATCATGCGAGGGTTACGACGAGAGGAACATGAAAATTGGAAGACCTCTATCACCTCATCTACTCATTTATAAACCGCAATTAACAGCAATGTTGTCAATTACTCATAGAGCAACAGGAATGGCACTTGGTTTTTATTTAGTTTGTTTAAGTGTTGGAACAATGTTAACATCCCACGATCTCATGTATTACATGTCATCTTTGGAGAATA…	yes	contig01426	OtL017-B10			9.90431	-1.84732	-2.49551	0	742	Non-Horn
contig01431_b864	GGGTCATTTAATTGACGTATGATTCACAATAATTGAGGTTGACAACTTATGTTTTTTATTTGTTGTAAAATATAAGATAAATAATGTCAACAAAACCAGACCCTCCGCCACCATATCCGGGGCCAAACCCCATTCAACCAGGTGTTCACCAACCGCAATATTATCCATATCAACCATCCGCCCCTTTAAATCAAGGTTTCATTCCGAGTTATGGTACTAGTACCCATACCACCGTTATAGTTCCACCAGAAGTTATTGTTGTCGGTGCCTGTCCAGCTTGTAGGATTGGGATTCTGGAAGACCATTTTACTTGTTTTGGATTGCTTTGCGCTATTTTCTTTTTCCCAATAGGAATTTTGTGTTGTCTCGCTGATAAAACAAAGAGGTGTTCAAATTGTG…	yes	contig01431	contig_79	OtL011-D02		9.93429	-2.20058	-2.66523	4	1259	Non-Horn
contig01435_a79	AAATAAATTTTTAATATATCCTTTTTAACAATTAAATTTATTTTAAAATAATTATGAAACAATATTTTCATAAAATAACAAAATAAAAACAATATTTTTTTTTAATAATAATACAATTCTTCCTTTATCAATTAAATAAATCCGTTACAAAGTTCCTTTTGTACAAATAAGAAACTACCAAATCTAAATCTCATTCAAATCATTTTTATTATTCAAATTGACTACTTCTTAGTAGCGGCTACAACTAGTCCAACCACAGCCCCTATAGCCAAAACAGCCCCTGATGTTATTGCTATACCAACTAATCCTTCTTTATCCATTTTCTTCTTAACAATAGCCTCTAAAGCCAAAACTTGTTGGTTTCCAGGTTCAATACTCAAAAACGATCGAATGTAATTT…	yes	contig01435	contig_126			9.56102	-1.84472	-2.15006	4	723	Non-Horn
contig01443_a80	TTTAATGAAACTGTGTCTATTACACCAAGTAAACCAGTTGATGAGGAGGAAGATAATTTAGATACAGAAGCACCTCTTGTAAGACCAATTCCTACAATATGCCACCATAGCATAATGTACGCTCCAAAATGTTTAGTATTAGTTTCGAGACTGGATTATATAGAAACATTTAGAAATTGTTTAGGAATCATTTACACCGTTTACATAGAAAATATTGGAGTTCCTTTGGAGACTTTAGTAGGGAACATTTTGGGTTGTATTCAAGTACCTCCTCCGGGAGGCCCCCAAGTTCGTTTTAGTATAGGGGCGGGTGACCGTCAAGCTCTCCAACCCCCAATAAGCCCCTCATTACCTGTAACACACMCAACCGTCAGTTTGATATTCCAACAATYGGGAATT…	yes	contig01443	OtL007-C11			9.07012	-1.7212	-0.760545	4	1045	Non-Horn
contig01458_a81	TTCCACCTTGTTGGATAATCCCTTGCAAAGGATTATTTCCTGGATTGTTCGGAATTAAATTTCCAGCTTGTCCCGCTAAAGATCCAATTGGATTCGACCCYGTTGGAATTGGACTTCCAGAAATAGCCCCACCGATTTGTTGGGCTACCCCTTCAATTGGATTCGTTCCTGTTTGTAAAGGATTTCCTGGGATTGCAGAACCGATTTGTTGAGCAACTCCTTGTAATGGATTATTTCCGCTTTGTAATGGATTCCCTGGGATTGCAGAACCGATTTGTTGACCAACCCCTTGTAAAGGATTATTTCCCCCAACCAAAGATCCAATTGCTGCACCTGGATTTTGAAGGTTTTCTGAAATTTGTTGTCCAACATTTGTTAAGTTTGGTGGAATGGTAGGGA…	yes	contig01458	OtL009-F09			10.4075	-2.18912	-2.71204	2	635	Non-Horn
contig01515_a82	ACCAGACCTTGGTTTAAATCGACACAAATKGAAGTGTACTGTTGTTGCTAAAACATAAACGTTCCACATACAAGAAGAAGCAAGATAAAAATGAAGTTTTTGATCGTATTCGCTGTGGTTTCCTTAGCAACGCTAAGCACTTGTTTCCCAGGTCCAAAAAAGGATACAGACGATGACGTGGAATTTATTCCAAGTGCAAGAAGATACAATCCATTTGGAGTTGTYGACGTTGAAGCTAATCCAAGTGGATATGATGACTTCGATGACGATTTCCCCGGTTTAACTCAAGGATGGAAAGATAGTTTTTCAGCGTTTATGAAAAGAGTAACCGATTTAGTTAAAAATGTCAGAACTCAAGTTGCTAAAGATTTAGAGGATAAACTTAAAAATGGAACTACA…	yes	contig01515	OtL020-F04			10.5338	-1.44849	-2.18097	4	754	Non-Horn
contig01534_a83	GGGGACGCTAGAGAGCAAKGCTTTACAAAAATAACGTCAAAAGTAACTAAAAACATTCCACTGTAAAATCTCAAAATTTCGTATATAATAATACYCRGAAAAGATGAATAAGGTAACGGAAGTGTTATTAAAACCTCTACAAAAATCTATCTATTTAAAACCATTCACGATGTATTACACACAAAATGGAAAAGAAAAAACTTGGGATTTATTAACCGTGCATGATAGTGTAGCGATAATATTATACAACGTAACAAGGAACGTGTTAATTTTCGTTAAGCAATTTCGACCAGCCGTTTATCTGGGTGGAATACCGGAAAAAGAACGAACGAATACAATCGATACAACAAAATATCCYCCGGAAACAGGGATTACTTTAGAATTATGTGCTGGAATTGT…	yes	contig01534	OtP007-G05			8.97624	-1.97633	-2.59619	0	756	Non-Horn
contig01549_a84	GGAGAATAAGRAGGGTTAATTTCCTCCGATCTGTCAAATCTTCACCAGGATTCTCGTTTTCTCGAATATTTCAYCGATTTCACCCAAAATGAGGGCTGTGCTTTTGATTATTGGCATCGTTTTGATCTCAATTGGATCTATTAAAGGAGAACCAGTGGGTATGGAGATCAACAACAGCACCGATTTTCCTACCCCCGAGGCTGTCTCTACATTAGAACCAGCGGAAGGTAACGACACAACCACAACAGAATTACCTACAACTACAACACCTACAACAACTACRACACCTGCAACAACTACAACATCTACCACAACTACACCATCAACGACTATATCGCCAACACCACCACCACCGCCACCATCAACAACTGGAAAAACAACAACGGAATCCCCTCACAC…	yes	contig01549	OtL007-F09			11.023	-2.47626	-2.42584	3	818	Non-Horn
contig01554_a85	GGCATACGATCTTGTACACTAAGCAAGCACCGTTCTTATTACCAAAATGAAATTCTTCATTGCCTTCGCCGYCCTCGTCGTTGCCGCTTCGGCCCTTACTCCTGAAAGGAAAGCTGAAGTTGATGCCATCGGCCAAGAATGCTYGACATCCAGCGGTGTTGAAAGGCCAAAAGTTGCCGATCTTCGTAAAGGCGTTTTCGCTGACGACGACAATTTGAAGAAGTTCATTAGTTGCGTATTCATTAAGACTGGAGGAATGAACGCTGACGGTACCTTCAACAAGGAAACCATCAAGAAAGATTTTGGTGAACGTAAAGAAGTTCTTGATGCTGCTCTCCTTTGCACTGACTCCCATGGAGCTACCGTTGACGAAACCGCATACTTGGCCTACAAATGCTT…	yes	contig01554	contig_95			7.74893	-2.1165	-1.55613	4	791	Non-Horn
contig01582_a86	GGCGCATAAAACCAACAGTGTTTTTATCTGATTTGTTACTCCGTTCCAAACCGAACTTGTTTGCTCTTTCTACGATTTAAATCAAACCACAAAAACAAGATTGACAACAAAGAATGTTTAACCAACCGAACACGTTGGGTATCTTTGGTACAACAACGACGACTCCAAGCAGTGCAAACCCCATGAAAGATTTCGAAGTTACTTCGCCCCCCGACGATTCCGTTAGTTGTTTGGAGTTTTCTCCATCAACAATTCCGCAAAATTTTCTAATAGCCGGAAGTTGGGATAACAATGTACGTTGTTGGGAAGTTGAGCAAAGTGGAAAAACAGTTCCAAAATCAATGCAGACATGTGGAGATCCGGTTTTAGATGTTTGTTGGAGTGATGATGGGACAAAAG…	yes	contig01582	OtL009-C09			12.2851	-1.72079	-2.13947	3	1113	Non-Horn
contig01586_a87	GAATCGATAACTCCGTTTAAAACGGTTTCGTTAATTTGGCTTTGCCATTTTTCGGGTTTTCCGAACCGATCGAAGCTCCTAAAATGGAATATTGCGGGAAACCATGGACGCTTTGGGATCGTTTCGAGATCCAAGGCGAGATGACATTGAGCGAATTTTTGGATTATTTCAAAAACGAACACGGTTTGGAGATTACGATGTTATCCCAAGGAGTTTGTATGTTGTATTCGTTCTTTATGGCGAAAAATAAAGCGCAGGAACGTCTTGGTTTGCCAATGTCTGAGGTGGTTAAACGCGTCTCAAAACGCCGAATGGAACCTCACGTTCGTGCTTTGGTCTTTGAATTATGCTGTAATGATGCGGATGGAAATGATGTYGAAGTACCATACGTTAAATACA…	yes	contig01586	OtL005-A11			12.1261	-1.59625	-1.73808	2	692	Non-Horn
contig01608_a88	GGATCGGTGAAAATGGCGAACTTTSCTTTTTCTCGTGTTTTCGAAACGTGAATGTTCCGAGCATAAACACAACTTAAATCACAGACATGGTGCGAATGAACGTATTGAGCGATGCTCTCAAATCTATAAACAATGCAGAAAAACGCGGCAAACGCCAGGTTCTCATCAGGCCTTGTTCCAAAGTGATCATTAAATTTTTAACGGTAATGATGAAACATGGTTACATTGGGGAATTTGAAATCGTTGACGATCACCGTAGCGGGAAGATTGTTGTGAATCTTACTGGTAGATTAAATAAATGTGGTGTTATTTCGCCTAGATTTGATGTTCCAATTACACATATCGAGAAGTGGACAAATAATTTGTTACCTTCTCGTCAATTTGGGTATGTAGTGCTTA…	yes	contig01608	OtP011-G03			11.9463	-2.00608	-1.80546	3	727	Non-Horn
contig01617_a89	AAATTCCTCGACCCATTCCGTTTCAAGCCGCGCAAACAAACCCTCCTCTGTATATTTCAGTGCAAATACAACTTCGCGTCCATTCAATCTTCGCCACAATGTCTTTGGAGTTCTTGCATAAATTCTTTGCCGCATTCTTTCTTTTATGTTTTCACCCTGCCGTTGGCGATTTCAATTCTATATATCTTCCACAAACTTATGCAATTAATTACGAACAACCAACAATAATCATATGYGGCGAYGGTCAATATTTTGATAATTGCGCTTCACCATGTCCTGTGACCTGTGGGAACATTAATAACCCGCCTTATTGCCCGGCAATTTGCACGAAGGGTTGCACGTGTATCAACAGGCGTTACGTATACGACAGCAGCACTGGGAGGTGTGTACCTCCTGAGT…	yes	contig01617	contig_348			11.2137	-1.18511	-1.248	3	1071	Non-Horn
contig01628_a90	TAGCAGTTATATCATGTTTTCTTCTTACTTGCTCCGGAAATGAGTCCGGAGTTTCATCTGAAATAAGACAAAAACGCAATAAAAACGGGATATATAGTGAGAGTACCTCCATGTAAAACAGGCCACGCTTTGGTGAATAAAAAGTGCAGAAAAATTTTTTATTTGATTGGATCCGGATAACAAAATGGCTAAGTTGATATTATCGGTTGTTTTATTATTAGTTTTAACGCTAGTAATTTCTCAAGTAAACGGAGACGCATGGTCTATAACGAAAGTAATGAGCAATCTGAAAAAAACCGAAGTTATTTCTCCTATATGTATGGCTGGATATGTAAAGGTCGGGAAAAAGTGTAAAAAAATATTAGGTTATAAAGGAAAATAACATATTTTGTGTTTATA…	yes	contig01628	OtL020-B04			8.71693	-2.05907	-2.04345	3	938	Non-Horn
contig01634_a91	AAAATCTCTATAAGAATGAGTGTTTATAAATAATTATTCATAAATAATTTTGGCTTCGGCCTTTTTTTTTTGAAAAAGGTGCGCTTTTTAATAGAGGTAACGTAATCGTTCGTTTTTACCGGCTTATACCAATTTTCAAAATGGCGAGCCCCGCATACGTCGAAGACGAAGTTGGGCAACGTTTCGACCGTTGCCTTACGGACGGAGTTCTAAAATTCGGTGGTGGTGCAGTATTGGGGGCGGTATTTTCACTGTTGTTTTTTAAAAGACGAAGGTGGCCAATAATATTGGGCGGAGGTTTCGGTATGGGTATGGCTTATTCAAATTGTGAATCCGAATTAAATGAACTGATGGCTTCACGCGCCCATGTTGTACCTAAAGCTAGCAGTAAATGCCAGT…	yes	contig01634	OtL009-C12			10.5634	0.0789818	-0.360558	4	797	Horn
contig01655_a92	CATCAAATGTGAAGGCACATTAACAGAATAGCAGTACTCTTCCCTTACTAAAAAAATTCACCCACAATTTTTTTTATTTTGCCTCCTTTATAAAAACCCCACATTATTTAATCATCATACAAATTTAAATTATTATTTAAAAAAAATTCCGCTACACTATGGCAGGTAATGAACGCGTTCAACAATATTAAAACACATCATTGAGACACCACATCATCATCATCAGTTAGTTAGTTTCTTTTTTCATTGATTTCATTTTAAGTCATTATTAATTAAAGTAAATTTTGTACATACAGCAGTAGTAGTAATAGTTTATAATTAAACGTAGCGGTTATTTTAATCAACCTAAGCAGGCTGAGAGTGTGCCCCTTTCTTTCCGATTAACGATTTATGAATATG…	yes	contig01655	contig_285			10.7101	-1.7539	-1.07668	4	816	Non-Horn
contig01665_b865	GAGTGCAATGAAGCTTCTATCTKGGRACAGACCTGCACTAGCATCCGCCGGTACCACTCAAGTCCGAGGGAGTGCGAAACAACATTTACATCTTCAGAGGCGCTCTCGAACAGTTTGGCTCCGAGTCTAAGGTTTCGGTTTTGAAGATGCGCGACATCGTCTTTAAGTTTTTGGCGTTCGCGGCCGCTTCCGCCATATCTACCGAAAATTTACGTTTTTCCGATCGACAATACAACGATTGGTTCCGGCAGGGACGTTCTTCGGAAATAATCGCCGGTAACCTCGCGGCTGCCACCGAAGGTAACTCCACCACGACCACTACATCAAACGCAGTTCCAAAATCGACGTTTTACCACCCTGTGTCGACAATTATCACCAATAACAGCAACGATTCCACCA…	yes	contig01665	contig_397	OtP001-E04		10.0428	-1.38606	-1.4175	3	1275	Non-Horn
contig01675_a93	GGACCCTAAAACTTCCTAAATCTTGGTGTTTGGTGTTTAGCATAACACAACGGATCAAAGATTAATTATTACGTAAAAAACATAAAAATGTTCACCACTAACGTTTTAAAAACTTTAGCTGTAAACGTAGCAAGAGCTGCGAGAAAAGCGCACACCCTCCCTGAACTCCCCTACGCTTACGAAGCCCTCGAACCCGTAATTTCCCGCGATATAATGTGCCTCCACCACCAAAAGCACCACCAAGCCTATGTAACCAACTTAAATGCAGCCGAAGAAAAATTACGATCTGCTTTAGAGAAATGTGACGTATCCGGGCAAATAGCGATCCAATCCGCTTTAAAATTCAACGGTGGGGGCCACATAAATCATTCAATTTTTTGGAAAAATCTTACCCCAAAT…	yes	contig01675	OtL001-G08			10.8747	-2.95715	-1.9764	3	872	Non-Horn
contig01687_a94	GTTCAAAACATTTAGAAACTTTTTTCAAAACCGTAGTGTAATTTTTTTTATTACGGATTGAAAAAGATTTAGATAGCATCGAACTGCGTAACTTATCGTGTATAAATAATTCCTTATCGCACAATGGAATTTATTAAAAAATGGCATATTTAAATAAAAGTTTGACGGGAAAAATTGACGAGTTTCGGTTATAAGGTAATTTCCTGCCGCGGCGGTAACACAGTGGTAGGAGAAAACTGACGCAGTCCGAAACGACACGACCAGTTACCACTTCTACCTGCCGGGAGTGAGTCGATTCAGCAGTACACCTGCTGCAAGTGTAATCAAAACATGCCAAAAGGTGCATAACGTGGTCAAAATTATTCAACACAACCTCAATAAATTATTAAAAAAAAGAAT…	yes	contig01687	OtL015-G09			9.93529	-2.12853	-2.74287	4	1180	Non-Horn
contig01705_a95	GGACAGCTTAAATCTGTAATGGCGGAAATATATGGGACAATAACATCTTTCTGTATAGAATTAACTCTTTATTTTCTATAGYAGGTACATTTTTTCGTGTGCAMACGATAAAATCAAATTCGCAAAACGGATAATTCGAGCGAATATTCAACTGCAAGAACGGAGATAAAAGTGCATTTAAGCCAACACAGTGTCTATGATGTTATTTGTATTTTTTGTGCTGTTAAGTTAATACGTACGTTAAAAGAAACCGTTAAAAATAGTACTAAGCGAGCATTTCCAACACGAGCTACCCTGAGGTCTCGTTATGCTAGAGAGTGGTGCCCCACACACAAGATAGCTAATGGCGAATTTGAACTTTTCGAGAAACATTGGAGGCAACAGCCTCGGCCGGACGAG…	yes	contig01705	OtL001-H08			8.77138	-2.6529	-2.30802	1	729	Non-Horn
contig01749_a96	GAATTTTAATTTGACATATCACCTTGTTAACATAACCTAATTTAATTGATCAAAAATTGTCTCGTATTAAGAAAAATGACTTTATATCATTTTGGAAATTGCGTAGCTCTAATATACGTGCCATATTACCTCACCTACAAATACTCAGGCTTATCCGAATATGGAGCTTTTTGGAAATGTATTCAAGCAGGGTTCATTTATATGGCTACGCAGTTGGTTAAAATGTTGATTTTGGCAACTTTTTTCCCCGATAATGACGCTGATTTGGGTAGTGATACTTTGGGGGAATTTTTAAAAACAACGGTTGATTTAATTGATTTGGGTGGATTATATGTTGTTTTAAACAGTATTCCTGGTAAAGGACATAGTAAAGTGTTGACTGCTGGAATTGGTTGGGCA…	yes	contig01749	OtL012-A02			8.34189	-2.13226	-2.25353	2	738	Non-Horn
contig01751_a97	GGAGTGTAATGAACGTSAAATAACGAATTGGAAAATGGCGGAGCAAGAACTGAACGTCGACAACTTAATTCAACGATTATTAGAAGTTAGAGGATGTCGCCCTGGCAAATCTGTACAGATGACAGAGGCGGAGGTGCGAGGCCTATGTTTGAAATCACGTGAAATATTCTTGCAACAGCCTATTCTACTGGAATTGGAAGCTCCATTARAAATTTGCGGCGATAGTTCACGGACARTATACAKACTTATTAAGATTATTTGAGTATGGAGG	yes	contig01751	OtP019-B03			9.99601	-1.02874	-1.80939	3	271	Non-Horn
contig01773_a98	GGAACTTCAAATAAAATAAACTCACTAAAAAGTKWACCTAAAAATGGCAATTTTAATAAACGCACTTCAAAAGTTATCTTTAATTGAATTACCATTAAATCCAAGAATTTTACCATCGGTGAGATGTATGAAATGGATAATTAAACCGGAAATTGGTAAAGGGGTGGCTTTTCGAAGAAAAATTCATTATCCCAAAGAATACACGGTTAAGCCCTTAGAAGTGACTAATTTAGGGGGGAGAGACCCCGAAACCGGGGCGGATGGTTGTAAGAGGARTCGGGGGTGGAATAAAACACAAATACCATTGGATACAATGGCAAAGATATGGTCCAAAAGATGAAAGTGAGCCTATTGTTGAAAAAGTAATAAAAATTTTAAAAGATGGGTGTCGTACATCTT…	yes	contig01773	OtL010-G02			8.83038	-2.31508	-2.07707	3	975	Non-Horn
contig01792_a99	TTTGATTTGACAACTCACTCCGATTGACAGGCGGAAAAATAACATGGACGCCAAATTTGCCAGTTGTGCTGTCTCATAGGGTAGAGAAACAAAGCCGAAAATCACATCAATTCCGTTCGTAACGGATAATAAGTCGCTTAAACGGAGCCTAGTCTACAAGGAATTAACCAAGATGAAGATTACACTTAAAAATTTACAACAGCAAACCTTCCAAGTTGAAATCGACGCCTCAAAGTCCGTGAAAAATTTAAAAGAAAAGATCGAAGCTGAGAAAGGCAAAGAATACCCCGCGGATAATCAAAGGCTTATATACGCCRGAAAAATTTTAACTGATGAAACTGCACTTTCTGAATACAATATTGATGAGAAGAAATTCATTGTTGTTATGGTAACGAAACC…	yes	contig01792	contig_143			11.8511	-1.26341	-2.39433	3	1262	Non-Horn
contig01815_a100	AGTAACGGTTAGGTTGGTAATAATTGATAAAAGCCCAAGCGTTGTATTTTGAATGCTATTTATCGATTTATTTCGATAATTAATACCATATGAAGGTATAAAAAGTGATTAGTTTAATTCAAATCAAGCATGGATATCAGACCGAATAATACGATTTATATCAATAATCTCAATGAAAAAATCMAAARAGAAGAGCTTAAAAAGTCTCTTTTTGCTATATTTTCCCAATTTGGCCAAATTCTAGATATAGTTGCTTTTAAAACCCTTAAAATGCGAGGTCAAGCTTTCGTGATATTCAAGGAGATTCAAAGCTCTACAAATGCTTTAAGATCAATGCAAGGATTCCCCTTTTACGATAAGCCAATGAGAATACAATACARCAAAAACTRATTCTGATAT…	yes	contig01815	OtL004-G05			11.6273	-2.56878	-2.91662	3	824	Non-Horn
contig01830_a101	AATAACTTAGTTTTCTTAATTAAAAACCTTTTTTAACACGTTGAGGTAACAAAGTTTCTTTTGCAAAGTTAAAAAAACTCAACAAACTATATTTTTTACCTTTTTTCGAGAAATAATTCGTAACAACGTCYCTCCCTTGATCTGTAGTGGTGGGCAAAACATTTTCGTTCGCCGACAACGAAATGAACAAAGCAAAGGGCACCAACCACAAACACAACGTAAAATAAGCTAATACCTCAGAAAATGAGTGATAAACACTCGCGAAATAACTAAAAGCAAGGTAATGATTAAGAATTATAAAAATCACTCCTAAAATAAACGCTGGTGATGTTAAAGTAACATAGGGGAAGTCTATTAATATCACAAAGTGGACAATTTGAGCTGCCACCCCACTTAATA…	yes	contig01830	OtL005-G04			8.58052	-2.297	-2.31204	3	696	Non-Horn
contig01872_a102	GTTTAATCAATACTTGAGGAATTCCTGGAAACTGAGAATGCATTTTATTCACAAATTCGATAACATATCTATCCGAACTGCGCATTCTCCATCGCGGTACATTCTAAGTAGATTATTTACATTTTGACACAATCATTCTTAAAAGTTTTCAACTGCAAAATAATCTTTAAAAAATGGGTTTTGATATCCCAGGATTTGCTTACGCAGCGGTCGTTGCAGCTGGAGGAGCCTTTGGTTATTACAAAGCAGGGTCAGTCCCGTCTTTAGCCGCAGGAGTTATTTTTGGAACTGTTTTAGCCTATGGGGCTTGGCAAGTTAGTCAAAAYGCAAATAATTATTCCGTACAACTTGCTGCAAGTTCAGTTCTTGCTGGGGTTATGGGTTATCGTTTCTTATAAC…	yes	contig01872	contig_28			9.97171	-2.51618	-2.38877	4	692	Non-Horn
contig01876_a103	GATGTTGTTACACATTTGTATTGTCTTTATCGCGATCATACACGATCTACAAAAAAAAATAAAAGAAAAAAACGTCACAGCTAAAACAGGATGTAACGTTTAGTCCAAAAACAGGAGACATACGAAACCGTTTTCTTTCGTTGAAAAGGAAACCGTTTTTACACTACTCACACTCCTACTTTACATAACAACAAAAAAAAAATTTGTTTAGGCGCCTCTATGACGTTGAGCCCAGGCCGCGGCCCCCCGACCCCGAATCAATAAATAGAGCAATAAACGGACGAAATGTACAGCGATATTTGCCGGGGGAAACCGCGACGGGGCCCAACGGTGCGACCTATTACAAAAACAAAAAAATCCTTTGTACTCTCGAGTTGTTGATGTTATTCCAAAATTGTA…	yes	contig01876	OtL010-A09			10.8293	-2.71644	-1.62318	3	565	Non-Horn
contig01902_a104	GACTTATTTGACACTGACACATKAGTACATCAAATCGCTCGCTAACTCGTTGGAGAGGGTGTTTTAAAAAATACATCACCATGGCTGGTCCTTTAAGGGTTATCCTCGGYACTGTGTTTCTTTCTGCAACAGTTACCTCCATCACTATATTATCTTTGTATCATCTTTTAACTGGGAAAGGTGAGAGGATTAGTTTTGGCWGGTTTCTTGAGGAAACATCACCTCATATGTGGGCTACAATTGGAATTGGTCTATCCGTAGCATTATCTGTCGTAGGAGCTGCACTTGGTATTCATACGACTGGAGTAAGCATCATCGGGGGTGGCGTGAAAGCGCCAAGAATCAAGACGAAAAATTTAATCTCAGTCATTTTCTGCGAAGCAGTYGCGATTTACGGTT…	yes	contig01902	OtL006-H05			9.65454	-2.16732	-1.98166	3	860	Non-Horn
contig01931_a105	GGGTACGCGTAAGTACTTACATCTACGCACACATTATTTGGTTTATTTTCTGATGCTATGTCGGGAAAATTTCTGTAAACATAAAAAAGACTGGGTCATTTCATAGGAAGTTGACGCGGTTAGGACAAATCCCTTGATTAAATAACATCGTAATCGACTCAGTATAAATATAAACGCAGACAAAACCATTTAATCACTTAGTTGTTAACGTTCATCTTGCGCATTACGTTATCTTTCTTTTCTTGTYGAAAACAAAAAATAATTATCTTTTAAACATGTTTAAATCGGTTATTTTTATGTTTATTATCAACTTAATTCATTTACTAAGTATTGTTAATGGTCAAGAAAAGAGTGACTGCAAAACTTATCATCTTTGTGAAACTTCCGAGGGTTACAACG…	yes	contig01931	contig_229			9.82086	-1.93018	-2.69148	4	884	Non-Horn
contig02003_a106	TCATGTTTGATGAACCCTCTTCTTATTTGGATGTTAAACAAAGATTGAATGCTGCACAAACAATTCGATCGCTACTTGGCCCTGACAAGTTTATAATTGTTGTTGAACACGATTTGAGTGTTCTAGATTATCTTTCTGATTTTATTTGTTGTTTATATGGTGTCCCAGGAGCGTATGGGTGTGGTAACTATGCCTTTTTCGGTAAGGGAAGGCATCAATATTTTCTTGGACGGTTTTGTACCAACGGAAAATTTACGATTTCGTGAAGATTCGCTCGTTTTTAAAGTTTCTGAGTCCGCCGCCGAAGAAGAAGTGAAACGCATCAATCACTATGAATACCCACATATGGTAAAAACGATGGGTAGTTTTAGATTGGAGGTGCATAAAGGGCAATTTTCG…	yes	contig02003	contig_219			11.2342	-3.33111	-1.88916	3	1186	Non-Horn
contig02016_a107	GGGATGGATTATTCTGGGTGTKATCAGCACGAGGTCTAGAAAGTTCCTCCATTGCGGCATTTTCACATCGTGTCAAACCGGCATCTAATCKCCTTTAAATCTTCTTTTTRTAAATCAACTCAAACTTTATTTAAAAGAAAATGGCTGGTGCTGCGGCGAAAAAATTCTTCCCAATGATGGATAGGGTTCTCGTGARAAAATTTCRAASCGATGACCAAAACTAAGGGAGGAATTGTTATTCCCGAAAAGGCGACTGCTAAAGTCTTGAAGGCTACCGTGGTTGCTGTGGGACAAGGTTCTCGGAATCAACAAGGCGAATTCGTTCCTTTGACAGTTAAAGTTGGAGACAACGTTTTGTTACCGGAGTATGGTGGTACCAAAGTCGAAATAGATGAGAAT…	yes	contig02016	OtL010-E10			11.5468	-1.69984	-2.47668	3	707	Non-Horn
contig02037_a108	TTGGGAGTCAGCTGCTTTTTAGGTTACCAAGTGTCAGGKGATTCCAATTTCTAAATTCGCCCAAAAAGTACTCGTTAAAATGGCTTTGCATTCRGCTATTAAAGGAAAATTACTTTCTGTTATCGGAGATGAGGATACTTGCGTTGGGTTCCTTTTGGGCGGYGTTGGARAAATAAACRAGAATAGGCATTCCAATTTTATGGTTGTGGATAAAAATACCGCTGTTAGTGAAATTGAAGATTGCTTTAAGCGTTTTATTAAACGTGATGATATCGACATCATTTTGATTAATCAGAACATCRCTGAGATGATTAGACATGTTATTGACAGTCATACTCASCCTATTCCCGCTGTTTTGGAAATCCCATCAAAAGATCATCCTTATGATGCTASTAAAGA…	yes	contig02037	OtP003-G04			8.94779	-2.02074	-1.53533	2	626	Non-Horn
contig02118_b866	GGATCATAAACTGTAATATTCGTACGATTCATACATTTCCGTTAAGCGGTACCGTTATTTTCGTTAAAATAAGGGAAGAATAGATAATGGCAAATATATCGCGAAGGATATTAGTAGAAACTAAAAATTTATCGAGAGATCCACCGCCTGGTATAAGTGCAATTCCTGATGAAACCAACTGCAGATATTTCCACGTAGTGATGGCAGGACCTAGCGGTTCTCCATACGAAGGGGGTCTTTTTAAATTAGAATTATTTCTGCCCGAGCAATACCCTTTGTATCCGCCTAGTGTAAGATTTTTAACAAAAATATATCATCCAAACATAGACAAACTGGGACGGATTTGTTTGGACGTATTAAAAGATCAGTGGAGTCCGGCTTTACAGATTCGTACCGTTT…	yes	contig02118	OtL001-H09	contig_62		9.32487	-1.80102	-2.49241	4	876	Non-Horn
contig02147_a109	AATTTATATTAAGGATACTTATTTTTTTAATTTTTATTTTTATTATTCAATTTCCGGACGGTTCCGGAAATACAAACGATTGATTCGCGTTCATCTCCTCAATAATAATCTTCAAAATCTTATTCCTGACGACCAACTTTTGAACTCTCGTGAAACTTTTCATAATCGGCAACAAACTCTTCATAAAATACAAATCGTCTGAATTTTCCTGTTTCGCTTCATCTTGTGCCAATAAAATATCCACCTTCTTTTGTTCCAACTTCACCAAATAAGCCAATAAATCCTCRTCGATATCAAATTTTGTTCTTTTTCGTTTCCTTTCTGGTGACTCCTCATCGTATTGCATTCGAGTTGATGACGATGATGATTCTTCTTCGAAAAAATTCGTGGGTGTACTGA…	yes	contig02147	OtL007-A05			10.1098	-2.46322	-2.00582	3	860	Non-Horn
contig02171_a110	GGGGCCCCCCCCCCAAAAAAATGGTTTAAAAAGTTTTTCGGGGGGGGGGGGGGCCCTTTTTTTTTTTTTTTTTGGTTTTTTTTTTTTTTTTTTTGAAACTAACTTAAACCTTTATTATTAAATTCTGCAAATTTCGTAATCACAATYCAAATTAACATTTTGATATAAAAGAAATGTTCGTAAATTAAGTGTTTGCAAATCAATAGACGTAATGAGCCCCGGCGTATCCATAAGAATAAGGATAATGAGCAGCGTAGGCGTATGGAGCTGAATAGGCTGAGTAAGATGAGTAAACTGGAGCAGAATAGGCTGTATAGGCTGGTGCAGAGTAAGCGGTGTAGGCTGGGGCGGAATACGCAAGATATCCTGGTTTAGGTTTTGGTTCTGGAGCGGCTACTG…	yes	contig02171	contig_291			12.6403	-0.99088	-1.71623	4	479	Non-Horn
contig02172_a111	TCACATTTTCCCCAAAGAAAAAAACCGTATACCGCATCGTCGACCCAGCACCAACAGAACACACTCTACTCGTTCGTACTCGGTGGGGGTGTCTAATAAAATGGCTACGTGAAGTGATGRKAGTGAATGTGTAACGTTTTAAATGCTCGAATCGGACCGTTTAAACGTCAATAAAAAGGCAAATCTAATGATTTAACCAGATGAGTGAACTAACGGTGGCAGTCATGCCAGGGGAAAAGCGGCTTCGGCAGCTCGAGGCCYTATTCCTGGGTGGGCCCGTGCAAGGCAGGGGGCAAAGTCTCAGCATTGAAACCCTGATCGATGTTCTACTAGTTTTGTACGATGAATGTTGTAATTCGAGCCTGCGAAGAGAAAAGACAGTTTCAGATTTTATCGAAT…	yes	contig02172	OtP004-D03			8.73106	-1.72112	-0.657063	4	1311	Non-Horn
contig02191_a113	ATATTCAAACTATCTTTATTAATTACAAAAAAAAATAGCAGAAACTTATTAATAAAATAAAAAAACCTTGTACAAACTCCACTGTAAAATTTCAAAAATTACTTTTTATAAGAAGTGCATAAGGGTCTTCACAGCCATAAAACCAGTGATAAAATAACCGGTAGCCCAAGCTAATGCTCTTGAGGGTTGTGGAACCACAACAACTGCATAAACCAATGTATGGACGAATCTAGCAATGGTAAACACTCTGAAGAGCAYCAAAGCGGTTCCAACTGCTGGGTTGGTTAACATGTAACCAAATCCAGCTACGAAGAAGATTGGGATGTTTTCTAAATCATTCAAATGAGCCCTCCTTACTCTTTCTACATTTTCATCTATTTTTGGTTTGAGTTTCCTTGG…	yes	contig02191	OtL020-G09			9.66808	-1.96667	-2.17807	4	637	Non-Horn
contig02200_a114	GGGTTTCTTTTGCGGCTCAACTCGAACTGACGTGGTTAAAATTTCGTTAATTCTAAAAACAACGTGAAAATGGATCTTTCTTCAATGTTCGATGATGTAAAACGTATGAATAAGCGTCAATTTCTTTATCAAGTTTTAAGTTTTGGTATGATAGTTTCGTCTGCTTTAATGATATGTGAAAGGGTTTAAKGGTTGTAACTGGTAGTGAAAGCCCTATTGTAGTGGTTTTATCTGGTAGTATGGAGCCAGCTTTTCATAGAGGCGATTTATTGTTTTTAACAAATTACCAAGATGAACCTGTGCGAGTTGGTGAAATTGTAGTGTTTAAAGTGGAAGGAAGAGATATTCCGATTGTGCATAGAGTTTTAAAGTTACATGAAAAAGAAAATGGAACTGTTA…	yes	contig02200	OtL014-B09			10.0707	-2.33868	-3.38617	3	702	Non-Horn
contig02269_b867	GGTTTTAATGTTGGTTATGTCAAAAACATAACCTTTAAAATTCATACAAARATTGATAAAAAAATGTATATAATCTAACATTACGAAATGCTCCCAAACATTTTTAGATATTTAAGTAACAAATATAATTATAGTTTATTAAAAAAACTAAAACAAATTCGTTTAATCGGATTATACACATCACAAAAACCTTAAACCACGGCGAATACGAATGGAAAGATCCTAAATCTGACGAAGAAGTAGTAAATATCTGTATCGTTAAAAAAGATGGTGAAAAAGTTAAAATTCGAGGTAAAATCGGAGATAACCTGCTTTATTTAGCCCATCGGTATGGCATCCCTATGGAAGGAGCTTGCGAAGCTTCTCTAGCTTGCACAACTTGTCATGTATATGTCAACA…	yes	contig02269	contig_223	OtL020-G05		8.47831	-2.59443	-2.29741	3	672	Non-Horn
contig02288_a115	AATAACTACTTTGCCTTTTATTATTATAAAATGAAATATTAATGATTAATAATGATACAACCTATTTATTTTTTGACTAGAGCGTCTACGTGTGAGACATAATTAGTTCCCAGGTTAATAAGGGCCAGTCCAGTGCTAATACCACAAGCTGTACATAGAGCAACGTTTTGTGGAACTACACTTCGTAAAATCGCCCAGATTAATACAGAACCCATTGAAAAGGATAATGCTCCAAAAGTACTGTAAAGAATCCTAGAGCTGGAAGTGGCTGATCTTAAATGGGGCCGACTATATAAATACAAACCTGTCCCTAATAAGGTATTTAATAAAAGAATATTGGTTATATCTCTTTTAGGAAATAATCTTAAGATAAGTGAAGGGTTCATAACATTTACGGAT…	yes	contig02288	OtL003-F11			9.74341	-2.97382	-2.39942	4	641	Non-Horn
contig02290_a116	TTTTATCAATAAATCTCTTTATTTGTATTAATACAGGATATTATTACAGTTTTTTTTTTACATTTACAATAAATTTTGACTAATGACAATGATCTAATTCGAATCTAAGACCACAATAACCACAGGCATGATTACCAGGTTTATCCAAGTTGATRTAGACTTTCGGATGTCCSGTAGGTCCACTACCTCCGTCACACCAAACGACTCGTTCTTTGCATTTTATTGGTGGAACTTTATCGATTAAATCAATTGCAAAATTAGGATTTACGTTGTTTTGGTCGTCCAATAAATCTGGCTAATCTATAATCGTTTTTATCCCATTTCTGTCCTGTATGAGTCACTTTTTCTTGRGGTACCCAATCAGAAGCGGACCTAATTTGCGAAAACGGCAATAATCGC…	yes	contig02290	OtL004-E06			9.09855	-2.58885	-2.90747	0	473	Non-Horn
contig02359_a117	GGGGAGTTTTTGGTATAAGTAAAGAGGTACAGCAAAAATCTCATCAATTTCTAATTGTTCATTGAAAATGTCGCTAAAACTATACTTTGATTTAATGTCACAGCCCTCAAGGGCCCTTTTTATTATGCTTAAAAAGTACAACATTCCATTTCAAGAATGTTTGGTTAATTTAGGAAAAGGTGAGCATATGACRGATGAGTACAGTAATGAAGTATCCAGATTTCAAAAAGTACCTGTTATTAAAGATGGGGATTTTATTTTAACTGAGAGCATTGCAATTTTGCGTTATTTACAACGTGAAAAAGGATTACCAGAGCATATTTACCCAAGCACTAGTAAAGAACAAGCAAGAGTTGATGAATTTTTAGAATGGCAACACAATAATCTTAGATTGTTTTG…	yes	contig02359	contig_170			8.40909	-1.27546	-1.51155	4	708	Non-Horn
contig02368_a118	GGGATTGACGCGTAACTGTCAATTGAAAACACCAACTGTCATCAACAGRACAGTCAGTTTTCGGTATTTAGAGGTTGTACTCGTACTCCGCCTTTTCTAGTAGTGCCTTCGGTTTGATTTTGAGTTTTTTAATATTTTAATAAACCACAATTTGGAATTATGTCGGACGAAATCCCGGAGAATGGACACGAAAACGGCGAGGATGTTCCGGTCGTCGAACTGATAATAMAAGCATCAACAATTGATGGAGTTCGAAAAGGAGCATGTCTTTTCYGCCAAGAATACTTTATGGACCTATATTTATTAGCAGAATTAAAAACAATTAGTTTGAAGGTGACAACAGTCGACATGCAAAAACCGCCCCCCGATTTTCGCACCAATTTCGAAGCGACTCCGCCT…	yes	contig02368	contig_178			11.266	-1.51523	-1.53231	4	1250	Non-Horn
contig02376_a119	CGGGGACTCAAGGTCTTCTTTTASACTGTTTGGGTGTGAATCGCTTTGAACCCGCATCCGGATACAAATTTATTTGCAACAAATTGACTTTTTAACACTTTGTGAAAAATGATTGATCCAACCATGTTAACTCTTTCGGRGAAAGTAAAAAGTCATATTACAACTTTCTTAGAAGAGAATGGTCAAAAAAACATAAAAATAAATATAGAACCTGGAAGTAATATTGGGGACAATTTCATGGGGTTCATTGGAAAACTCACAATAACCACTAACGATGATAAAAACCAACCAAAACAATTCAATTGGATCATAAAAACAGCTCCAAATTTAGAAATGCATCAAGCAGGACTAAACATAAGTAGTTCATATTTAAGGGAATCTTACATATACACTGATGTT…	yes	contig02376	OtP007-E08			9.82688	-1.33969	-1.54313	4	907	Non-Horn
contig02407_a120	AAAATCACATCAATAATTTATTGAAATAAATAAAAAAACAATAACGAATGTCGTCGAAATTACTGCATCCACGCATCGTAAGCCATTTCTTGAGCAGATCTTCCGTATCCAGTATCCCATCCATGAGGAGCAGCWGCAACATGATCAACATGGTGGTGATCAAGATGTTGAGGATAATGCACAACYTCGTATGTGGTCACTTTCGGTTTCGACAATTTAAAGATCAACATAGCTCCGGTTAACACCATGGACAAAAGGCCAAGAGTCAAAGCTTTCCAAGTTTTAAGAGCGATCAAGGCCAAAGCTAATGGAACTAAAACGGCCGTTTTGAATTTCAAACCCAACAAGAATGGGACGATGACCTTTTTAACGACTTTAGATCTTCCGGTTGCCGCGAGG…	yes	contig02407	contig_37			8.30167	-1.68181	-0.958135	3	822	Non-Horn
contig02417_a121	GGGCCCCGCCCCCAAAAAAAGGTTTAAAAAAACTTTTGGGGGGCGGGGGGGCCCTTTTTTTTTTTTTTTTTTTTTTTTTRCGTTCGAAAATAACTTTATTATTTCATGTTAATTTCCATATTATAAGCGTTTAACAAAGCGAAATTAAAATCAAATACAACCTTAAAATTAAAAATTTAAATTTACTGTAAAAGTTAAATAGGTTTATTATTAATTTTCCTTTTTAGTTGTCCTTTAAGAATTAAATATTTTTAAGAGACTAAAACATTTCCTCGGGCTTCTTTAGGTGCACTAGACGATTCCGGTTCGACTTCATCCTTCAAAGATTCCGGTCCATGAATACGAATATTATTCTTCACTTTAAAATCGTAAATTTCGTGTGCTTTTGCAATGAGATGT…	yes	contig02417	contig_56			11.2029	-2.24875	-1.93609	3	743	Non-Horn
contig02420_a122	GTTCTGCCTGTCAAGTTTATTCTCGACAAGTCAAATTTTTAAAAATACATTTTACATAATCTTAAAGAAAAACGTTTTTATTTATCCTCCGGTTTAGCAAAAACAAGAGTATATCCACACTTCCCACAGTAATGGCGATCCTCCATGGCAGCCATAAAGCATCCAGCCCCACACTGTTCGTTTGGACATTCTCTTCTCAATCTATGGATTTTTCCATTATCATCCACCYTGYAAAATCTCAATACAGGTAACTTAACCTTCTTCTTCTTATGTTTAATTTTTTTTGGAGTTGAATAATTCTTCTTCTTACGCTTYTTAGCCCCACCACGCAATCTTAGGACTAAATGCAACGTTGATTCTTTCTGAATATTATAATCAGAAAGAGTGCGCCCATCTTCG…	yes	contig02420	OtL015-D09			12.6201	-1.30266	-2.56101	3	612	Non-Horn
contig02557_b868	TAAGTTGACAATACTACGTGATAAGACATATCACTTTCAATCAGTTATCCATTTAAACCGGAATTTATATAAAAAGTCGATTCAACCTAAACCAGTTTTTTTCAATAAGGTCAAGGTTACATCACATTCCTCTTGTAGGCATAAAATCAATTCGTKYYSRRSCAYTTCAAAGATGTCTCTGAAACATTTAGGTGCAGGGTCTGAATGCCCACCAAAAAGCGATGAGAAAAAGCTTCGTTTATATTCAATGGAATATTGCCCATTTGTACACAGGGTGAGGCTCGTTCTTAGAGCTAAAAATCTTGATTTCGAAACGGTTAATATTAACTTAATCAACAAACCTGAGTGGTTGTTTAAGTTACATCCTGAAGGTAAAGTTCCGGCTTTAGAAATAGGCGA…	yes	contig02557	OtL011-H01	OtL018-A01		11.586	-1.45262	-1.75828	4	1096	Non-Horn
contig02650_a123	ACTGATGTTATGGTTACTGTTGCTAAAAGCTTTGAAGCCCCAATCAAATTGGTTTTCCCTCAAGATTTATTAACAAATGGATTAGCTGCGAATAATTTTGCCATGTTAGGTTTAGGAGATATCGTTATTCCAGGAATATTTATTGCATTACTTTTACGTTTTGATCATAGTTTAAAAAGAAATACACACACTTACTTCCACGCCACTTGTTTCGCGTATTTCTTGGGGTTAATGACTACCATTTTTGTAATGSACATGGTTTAAGCATGCCCAACCAGCTCTGTTATATCTCGTCCCCGCCTGTTTGGGTACCCCACTTTTATTGGCTTTAGTCAAAGGAGATATAACTTTAATGTTGAAGTACGAAGATAGTTCTGAGGAGAAAGATAAGGATGAAGG…	yes	contig02650	OtL006-H10			10.5952	-2.09533	-2.11887	3	681	Non-Horn
contig02661_a124	TTTCGTGTAGATGTAGGCTCCGTTCGAGGTATATATAACGTGGTGGGTTGAGTAGATGTAAGTCCTATCGTGGATCTGTGGGGCCAAATCATGCCGGGGGTGGTAGAACTTGGTAGTCTGGCGGTGGTGCTATTCTGCATTCGTCGGGTGCACAACAAACCTTGAAGACGATCTTCATATTGTTGGTGGAGCACCTGCCGCCGATCCTACGATGCAGGTCCTCCTTCGATGACGTGGATATGAAGTAGTAATCCTTGCCGGGTAAGAACTCTAATCCGCCCGGTTGAGGTGTAAAGGGCCTGAACGTGATGGTGAAATACATCAATTTGTGCGGCTTGTCGCACACGGCAATAATTCTCGGATTTGGATTCGTTATCCTGCAGGTCTCGTATTCTTCCT…	yes	contig02661	contig_260			10.3081	-1.57918	-1.20489	4	909	Non-Horn
contig02677_a125	GGGCCTTTCAAGTTCACGWCTGTTYARCAGCGTGATTAAAAATAATATTTATCCGTATTCATCGGGTAATATATCGCTTATAAACAGCGTTAATTTATTAAAAACGCCTTAAATATGCCGCCAAAGTTCGATCCTACAGAAGTTAAATTCGTTTACCTTCGTTGTGTCGGTGGTGAAGTCGGTGCTACATCGTCTTTGGCCCCAAAAATCGGTCCATTAGGTCTCTCTCCAAAAAAAATTGGTGATGATATCGCTAAAGGAACCGCTGATTGGAAAGGGCTTAAAATCACTGTTCAATTAAAAATTCAAAACAGACAAGCCACAATTTCTGTTGTACCRTCTGCGGCTTCCTTAATTATTAAAGCTTTGAAGGAACCACCACGAGATAGAAAGAAGCAA…	yes	contig02677	OtL016-F11			12.7379	-1.64716	-2.39032	3	653	Non-Horn
contig02678_a126	AGTTCAGCTAAACATTTATTTTTAAAAATCATTTTAAACCCAACACGGCAAACAAGCTTACAAAAATATTCTTTTAAAGAATAGTAATATTACAACGCGTAAATAATTTATAATAACATTGTTCCCTGTTTTTCGATCATCTTCGTTTTCCATATCCATWTTCGTTGTTGATTTATGCTGGGATTAAATTTGTTTCGGAATTTTTGGTGACCAACTGAAGAAGACTTCCGGATTGAGGACGATTTTTTCCAATAGTCCAGTTGTAAAACAATTCAGATATATAATCCAAGGAAGTCCAAGTTGTAAAATCAGCTTTGGGCATCCATTTTCTGTTCATTGGAGTGTCTAAAGTAATAGGTAATATTGCGACAGCCACGGAATCTACTGGCATTCCACTAT…	yes	contig02678	OtL001-B10			9.46629	-1.9088	-1.56975	3	574	Non-Horn
contig02679_a127	AATAAATTTACATTTATTATTATTTTACATCATTAATACTTCCTATGAATTGATTTTTCTTCAGTTTTCTTTTCATCTACTATCTTCATTTATTTGGGATGGCTTCTAACCCCACAACTTTATAAGGATTTCCACCTGCTAGTCTTCTATCCCTAGTATAATTGTATCTATCAGCTCCAGTAACCATACCTCTTCGATACATGTTTTCCAAGTACCAATTTATTAATAACATACGCAGAGGCGTGCGGAAAGGTCATCGCCACCAAAATAATTCCAGCACTCGGCAAAATTTCGTACCACATTGTTATAGAAAATTGARGTTTCACTAAAAAATATTATGATCACCGTATTTTGTAACTTACGCTTATCCC	yes	contig02679	OtL005-D09			9.17736	-2.32881	-3.40769	0	371	Non-Horn
contig02684_b869	GACTATCTTTTCGATTTAATTTCTTGAAGAAATGATTCAAAAATTAATTTTAAGAGGCAGCTAAAAGGCGAATATTAAAATAGATCTTATTAGAATAAAAACAAAAACGTCGAATACAATGACCTTTGAGCTAAACTGGTCATTATCGTAAGCATAAACAACCATACAAAAGCCAAGATCGACTTGTTTTTCAATCAGTACCGTTTAAAACTCCTTTGTGTCACAACAATAACAAACGTTTATCTACAACCRCAAAATGATTCAAAAATTTTTTTCGGTAGTGTTTGTGTTAATTCTTTGTTTATTTGGAACAAATGCGAAACTTTTCGATCCACCAGATCATGATAAAATTGCTGCGATGGCTCGATATATCATGAAAAATTCAGATTGGGTATCTTT…	yes	contig02684	contig_132	OtL003-G06		11.275	-1.28641	-2.12352	4	1148	Non-Horn
contig02693_a128	TGCTTTAGAATCATTTTAACAACAGTAGAGACAACATGACCATGCTCAGTGTTGATGCCCAGATAAGGTACTTGGTGCAATGGTTTAACGAGTGGAGTGAACTGCAAAAGTCTGATTTTTTACCTATTATGACGGAAAAATATACAAACAAACCATACGTTAATGGAATTACTAACGATATTGCTAACATTAACTGCCAAGAAAAACCAATGTCATTATTCCAATGCAGGGTAAAATTGTTTAAAGAATGKTTTTCTCAATGGAATCCGGAACAACGTGAATCGTTTTTGAAAAAAATATTGGAATCGGACGCTAGTTTTGCTGAAAAACTAAAGGGGGAAATGCAAAATGGAATTGATCATGACGGGAATGAGGAGGAAATACTCGAAGACTGATTTA…	yes	contig02693	OtL017-D03			10.4928	-1.66801	-1.87595	4	651	Non-Horn
contig02776_a129	GTGTAGATGAAGTAGTAAGCGTGGCTCTTCAGGGTACTAAAAGGTAATTTTCCGACCGTTTACGTTGGTTTCCGGGGGCGCAAAACAACGTGAGGGCGTCGCGACGCGAGTTGGAAAGATAACGGTTCGACAGGCGACGTTCAAAAAGCATTAGCGCCGCGTGAAAACGTCAGCGAACGTCCGAGTTGTACGCGGTCCCTACACCCACCATTACGAAAAATTGTTCTGTTTTGATGTAAATTTGTCGGTTCGTAGGAAAATGAGCAGCTCAGAGGAGGTTTCCTGGATCTCGTGGTTCTGCGGTTTGAGGGGCAATGAATTTTTTGTGAGGTTGACGAGGATTACATACAAGATAAATTCAATTTGACCGGATTAAACGAACAAGTTCCCCATTATAGA…	yes	contig02776	OtL012-E04			9.95118	-2.05585	-2.13404	3	1234	Non-Horn
contig02807_a130	GGTTCTCGTCGCCGGTTTTCATTTGGCCTTTGCATAGATGCGTAACGGCGAAAGGTCATCATCGGGTTAGGTATAGTAGCGGTGGCGAAGGAGAGAGTAAACGACTTCTTCTTCTTGTATTCGGTACGGAGCAGARGAAGCACATCTTTTGCGCGACCTCGACGTCGTTAACTTCGCGAGCGCGAAGAAGTTAGRGTTCAAATCGAGTCTAAACAGTTCACGTTTCGTGATCTTCCGCGCCTCCACCTATTTTTTTTTAATCCCCAATTTAACAACTTTTAAATTAAAAGTGACCTAATGGGGAATCTTTGAAGAATAATTTAATTGTTGCGATTTAAAATTATTTTTRGGTGTTCTTCGATTTTGAGGGAGATTTTTAATAAAATGAGGTATTCCATT…	yes	contig02807	OtP005-D08			9.98423	-1.02574	-0.9825	3	841	Non-Horn
contig02861_a131	TAAGTAATCCTGCAATAGAAGAAATAACCCCCAATGTACCCACAGTACTTGGSGATAACTTTGTATAACCCAAAGATGTCATAGGAATAAAWATATCGCAACCGTTTTTAATAATATCGATTAAAACGTTTCGATGTGATTGTAATAATAAAAGGGACGTTGTTAGTACTTTTAAAACGTCTGGAAGACTTGAAATGCCTTTGGATGGAATTAAACTTGTTTTGTRTGATTTTAAAATGTTTGTAACTTCATATAGATCTCGTAATAAATTAAAAATAAGGGAATAAAACCAGTATTGGGTTGATAACCGACCCCATTTGTCTGTATTAACAGAACATAAATCCGATCGTCCCAACCACAAAATGTGATCTCCTAATAAGAATAGAGCTGTGTTTAATC…	yes	contig02861	OtL020-F08			9.13988	-2.82665	-2.34447	4	756	Non-Horn
contig02865_a132	GCATTTTCGTAGAGACACGTCGCCTAAGTTAATATGGGTCGTGTTATTCGCGCGCAACGTAAAGGTGCCGGGTCGGTTTTCAAGGCCCACACTAAGAAAAGGAAGGGAGCCCCAAAATTGAGATCTTTGGATTTTTCTGAAAGACATGGTTACATTAAGGGGGTCGTTAAAGRCATCGTCCATGATCCAGGCCGTGGTGCCCCGTTAGCTGTTGTCCATTTTAGGGACCCTTACAAGTTCCAAACAAGAAAAGAATTATTTATTGCCCCTGAAGGAATGTATACTGGTCAATTTTTATATTGTGGCAAAAGGGCTAATTTACAAATTGGAAATGTTTTACCTGTTGGATCAATGCCTGAAGGTACAATCGTATGTAATTTAGAAGAAAAGACTGGTGAT…	yes	contig02865	OtP011-B10			12.8248	-1.84689	-1.59565	4	870	Non-Horn
contig02915_a133	GGAGGCGACTGCTGTGCTGTTGTGCGCGGGTGTTTCTTAGCAATTGTTTTTACGAACGAACGTGCGTTTTTATATATTTTGGAAGCCGAATCATCCAACCCGTTCGATTCCCAACTGAAGGAACGAGTTTCGTTCGACTTAAGATGGAGTTGGAAAATTTGGAATACGATTATGGGTTAGAAGATGAGGGATTCTACGAGTCGAACACTCCAACGAAAGACTCCAAACGAAGGGTTACTTTTAGTAACAAACCTTTTGTTGCACAGTATGAAGATCAGGAACAATTTTCTCTTACTGTTCTCAAACAAGAAATCGACGATGTCGAAGATGAATCCTCTCCGTTTTCTAGATCATTGGATTCGGTTCAAAAAGTGCCTTCAATTAGCGATTTGTCAGATC…	yes	contig02915	OtP012-H08			9.3293	-1.52564	-1.77904	3	960	Non-Horn
contig02924_a134	GGGAACTASGTATCATTTTATGTTGTAACACGTATAAATACGTAATCATCATCAAGAATYAAAACTTTATTACTTTAACCACCAGTAACGTTTTAAATTCTAATCGAAAACTACGTATTTGWGTTAAAATCGCTTCGCTTTAAAATTATTTTTTAAAGTTTCATAACCTCAATTTAAAAAATAAATAAATAAAAGATGGGTGACTCCCTTAATAATTTAGCTGTGTTTAAAACGATGAAAATCGGTTTTATCGGTGGAGGAAATATGGCACGAGCTATTGCGGAAGGAATTGTGCAAAAAGGACTCGCCCCATACTCAAGCATGTACGTTTCGGGGCCCCACGAAGAAAATCTCAAAGAATGGAAAACGAAAGGTGTTCAAATCACCACCGAAAACGGG…	yes	contig02924	contig_201			9.68565	-2.76638	-2.59585	3	941	Non-Horn
contig02982_a135	GGTTTCTGTCACGGTCAGTGTAGGTGAGGYGAACGCAAACGAATCTTTGACTAACAATTTCAAAAGCAGTCGTTAAACATTAAATTCCGGCCTGAAAATGGCAGGAAATACGGGGATGGAACAGCTAATCCCTATAGTGAACAAATTACAAGATGCGTTCACCCAAATTGGGGTGAACATGACGATGGATTTGCCTCAAATAGCCGTTGTGGGCGGACAAAGCGCCGGGAAGAGTTCCGTTTTGGAAAACTTCGTTGGCAGGGATTTTTTACCCCGAGGTTCCGGAATCGTCACAAGACGACCACTTATCTTGCAGTTAATTAATGCCAATACAGAATATGCCGAATTCTTACRTTGCAAAGGTAAAAAATTCGTTGATTTTGATGAGGTTCGTCGTGA…	yes	contig02982	OtP014-C03			9.1517	-1.3711	-1.89904	2	727	Non-Horn
contig02997_a136	TGGACACATCGATTTTTGTCATTTTTGTTTTGTGRGTGACGCTTTCGAGGTTTATTGAGGTTATAATGAGTCTTAGAACGTTTGGCGATAAACCGATAAGTTTCCAATTGGAAGAAAATGGGGAATATTATTGCGTTGGATCCGAGGTTGGAAATTATCTCCGTTTATTCCGGGGGTCCCTTTATAAGCGTTACCCGGGAATGTACCGGCGTTCCATAACCAACGARGAACGCAAACGCCTCATCGATCTTGGATTGAGCCAACACGTCTTGGCTAGTAGCGTATCTCTTCTCCGAGCGAATGAGGTTGAGGATATAATTGAGGGGAACGATGAAAAATACAAAGCGGTYTCGGTTCACACTTCCGATCCACCTTTACCACGCGAAAGCAAATCGAAAA…	yes	contig02997	contig_427			10.3267	-1.82753	-1.97724	4	1215	Non-Horn
contig03001_a137	ATAATACACCAATWWTTTTCTATACCATAATTGGATCATATTCATTCTTTTAACCTTCTTTTGTAATTGTAATACTCCGTAAAGTAARGCTTCAGCGGTTGGGGGACAACCAGGTACATAAATATCAACTGGAATAATTCTATCACATCCTCGAACCACTGAATAAGAATAATGGTAATATCCCCCTCCGTTAGCACAACTTCCCATTGAAATAACCCATCTTGGTTCGGGCATTTGATCATAAATTTTTCGTAAAGCCGGTGCCATCTTATTAGTTAATGTACCAGCGATGATAATCACGTCTGCTTGCCGAGGTGATGCTCTGAATACTRCACCAAACCTATCCATATCATATCGTGGAGCAGCAATATGCATCATCTCCACAGCGCAACAAGCCAA…	yes	contig03001	OtL007-E04			10.0518	-2.79166	-2.26814	1	723	Non-Horn
contig03017_a139	GGAGATAGGTTCTGTCKGGTGTCAAAATTGTATAGATCAGTTTTGATCTTTTAAATCATTTATTCCTCCGATTCTCCACAAAAATCACACGCAGAATGGCCTCAGTACGTTCCTTTTCTCGTTTATTAACCCGTCAGACGTTCAACACCGTCTCAAGAAGAGGATATGCGGATGAAATGAAATTCWCTCTCTTGCTGCAGGCAATCAGGTATTTTACGACTCAGCTAATGTAAAACAAGTCGATGTCCCCTCATTTTCTGGAGCTTTTGGTATTTTACCAAAACATGTCCCAACCTTAGCAGTGTTAAAACCYGGAGTGGTCACAGTTTTTGAAAATGAAGGAACAGTTAAGAAAATCTTTGTTTCAAGTGGAACTGTTACAATAAATGAAGATTCTTC…	yes	contig03017	OtL004-B11			10.2758	-2.52559	-2.84859	1	637	Non-Horn
contig03027_a140	GGAGYCTTGATAAATCTTTGAATTGTAAAAGATGGAAACTTCGATTGATTTCTTAAAACCATGTTTTGTGATAATTACGGGTGCCTCAAAAGGTATCGGAAGACAAATCGCTATTGATACGTCAAAAAAGTTATGTGATGGATCTGAAATTGTTCTTGTGGCAAGATCTGAAGAAGGATTAAAAGAAACTCAAAGTTTAATAACATCTGTTACACAAAAAAACATCAAAATCGAAACGATTAAGGTCGATTTTTCTAATTTCACCTTATTGGATTGTGAAAAATTCTTTAATAACTTAACAACAAACACACAATTTGAATCAGGAGTGATTTTCCACAACGTTGGTTCAATTGGGACATTAAAAAAGGTTACAAATTTGGAGAATCTCGATGAATGGAA…	yes	contig03027	contig_224			9.9872	-2.14365	-2.2538	3	858	Non-Horn
contig03056_a141	GGAGTTGTGTTCGTGCATCTGCAGTTGCAAGACGTGAAATTAGTGTATTCCGAATTGTCACGGATTGAAGTTGATTTGAGATGGCCCGTACAAAGCAAACAGCCCGTAAATCTACGGGAGGAAAAGCGCCCCGTAAGCAGTTGGCGACGAAAGCAGCCCGTAAATCGGCCCCTTCGACTGGAGGAGTTAAAAAACCCCATCGTTACCGCCCGGGTACCGTAGCCCTCCGTGAAATTAGAAGATATCAAAAATCTACTGAATTGTTGATTAGAAAATTGCCGTTTCAACGATTGGTGAGAGAAATCGCTCAAGATTTCAAGACTGATTTACGTTTTCAGTCCGCTGCAATCGGGGCTCTTCAGGAAGCTAGTGAAGCTTATCTCGTTGGTCTCTTTGAAG…	yes	contig03056	contig_360			12.6785	-1.39804	-2.07546	4	905	Non-Horn
contig03072_a142	GAAATCGTTTGCAGCCATCTTTAGTATCCGGTTTGTGTCTTTTCCGTGTATATCGCGACCATGACAGGTTTTAGTAAAAAGCCTATCTTGATTGATGCGAAGGGCCACCTCTTGGGTCGTCTGTCCGCAATCGTCGCAAAAACTCTTCTTCAAGGAAATAAAGTCGTTATCGTACGATGTGAACAGTTAAATATTTCTGGAAATTTTTATAGGAACAAACTCAAGTATTTGTCGTTTTTACGTAAACGATGCAACGTGAATCCCGCTCGTGGTCCTTTCCACTACAGGGCCCCATCCAGAATCTTTTGGAAAACTGTACGAGGTATGGTACCACATAAAACGGAACGTGGAAAATTAGCTTTGCGTAATTTAAAAGCTTATGAAGGTATCCCACCTCCA…	yes	contig03072	OtL009-B04			10.6387	-2.20538	-2.42103	0	706	Non-Horn
contig03076_a143	GGCAAGGGATAAGGAAGGGGGAGGATCAGTTTAAAACAGTACATGTGTTAGATCAKSAAGCTCTGTAAAGGTCTTCGTTCCGTAGGTGATACTTCGTACTAAAATTAAATTAAATAATGGATGATGATGGTGGAGACTGGKTTGCGGCAGCTGATGATGAACCAGCGCCAGCAGCGGCAGCACCAGCACCAGCCGCGGGTGGAGCAGCAGCTGCACCCGCAGGAGCTGAACCAGCTGGTGGTGAAACAAAACCAGTTGATGAACCTAAACCGGAAGCAGAAGCGGAATATTTAGATCCAGATAAGCTACTTCTTTGCAAACATTGGATTCGTCCAAAATTCCTTCAATACAACTACCTCTATGATTATAGACTAAATTATTACGACGACGTAATTGATT…	yes	contig03076	OtL003-F12			8.80671	-1.71782	-0.959235	3	708	Non-Horn
contig03116_b870	GACKKAATACATTTTGTGTTGTCATTGCTATATCAAATTTGAGACTACATTAGCAGAAAAATGGCTCTTTTAAGCGCTTCTCAACCCAATTACCCTGATTATTCTACACAGGGAATTACCAAACATCATTTTAGTCCTTACGCCGATAACGGAGGGAGTATTGTAGCAATTGGGGGTGATGGATTTGTAGTAATTGGTGCCGATACTCGTCTCAGCACCGGTTTTTCAATTTACACCCGAGATCAAAACAAAATCTTTAAATTAACCAATCAAACCGTTCTTGGATGTGCCGGATGTTGGTGTGATACATTAACTTTAACTAGAATCTTGAAAGCTCGCATGCAAATGTACGAACAAGAACATAACAAAACCATGTCAACCACAGCTGCAGCTCAAATG…	yes	contig03116	OtL008-H05	OtL017-E08		11.4358	-2.19262	-1.80657	3	822	Non-Horn
contig03145_a144	TAAGTTGAGGAAAAGGGAGGAACACGGTAACAGCGTTCATCCAGCAGATGTTGTTCTTCAACAAACCACCACCAATTCCAACAACGGGACGACGATTTCCCTTAATAATAACAACAACGTGCAAATCAACCAAATTAATCAAAATAATCATCAACCGACAACCGATCCATTCGTTAGATGGCAATTCCCTCCACCAGAACCAAAACCAACGTACAATCAAGACCAGGATTCGCTTGTACAAAACTTACCGAGGGATAGACCAGGTTTTGTGACGGGATTTAGGAAGAATTTGGGTGGTAAATGGAGGCGTTTAGTAAAAAAGAAGCCGACAACGGAAGTGTATACGATACCGGCCGAATTGAAGCCTCAATTAAAACAAATTTACGTGTATTAAAAAAA…	yes	contig03145	OtL015-G02			9.66388	-1.20165	-1.36392	1	978	Non-Horn
contig03168_a145	GGGGCACCGATTATTCCAATTTCTGCCCAGTTGAAGTATAACATTGGGGTACTTTGTGAGTATATCACGAAAAAGATTCCGGTCCCCGTGAGGGATTTTACATCGGAACCAAGATTAATTGTTATTCGATCGTTTGATGTTAATAAACCGGGTTGTGAAGTTACCGATTTAAARGGAGGCGTCGCTGGAGGAAGTATTTTAAGARGTGKTCYCCAAAGTKGGACAAGAAATTGAGGTTCGTCCTGGTCTTGTAAGTAAAGATTYTGAAGGAAAATTAACTTGCAAACCAATCTTCTCTCGTATTGTYTCCTTATACACGGAACAAAACGAATTACAATTTGCTGTCCCTGGTGGATTAATTGGTGTTGGGACGAAAATTGAACCAACTTTATGTAGGGC…	yes	contig03168	OtL007-E07			10.4044	-3.0104	-2.70885	4	814	Non-Horn
contig03181_a146	GGATTTTTAATTATTATATTTTCTTACACACCTATTACATTATTATCAATTAATTAATAAAAACTAATTAGATTAAAAATCTAAAAACGTTCACATAAATTAAAAAATAAACTCTCTCTTAACCTCACTTTTTTACYGGTACACAAAAAAAGGAAGACAAACAATTTATTTAATGTTGTTAACTACTTGGAGTATCTTCGTTCCAAATCAAAATTAAATCAAATTCTTTATCACAATCGTACTCATTAATTCATCTTATTACAATTAGTTAAATTAAACAATTTACGTCTTCCCTACTTCGTTATCTTTATCGTCTTCGCCTTCGACGTTCTCTTTTAAATCGTTTTTGTCATCTTCGTCSTCCTCTTCTTCCTCCTCGAGCAACTTTCGCGCTAATTT…	yes	contig03181	OtL013-F09			8.89764	-2.02784	-2.68673	2	702	Non-Horn
contig03185_a147	ATCCTTATAGCTTAACAAACGGAAGTTCCCATGCGGACACAATGCTTGATTTAAGTTCTAAACTGATGTCAACAAACATATTCCCGCCAAAATCGCAAATAAAACGCCAAAAAATGATTTATCATTGCAAGTTCGGTGAATTCGGCGTAATGGAGGGTCAGTTTACGGAACCTTCTGGTGTAGCAGTAAACGCCCAGAATGATATAATCGTCGCGGACACCAACAACCACCGAATCCAGATTTTCGACAAAGAAGGTCGCTTCAAATTCCAATTTGGCGAGTGCGGAAAACGCGACGGTCAACTTTTATATCCGAATAGGGTGGCGGTCGTGCGAACATCCGGCGACATCATAGTCACAGAACGTAGTCCAACGCACCAAATACAAATTTACAATCAAT…	yes	contig03185	OtP017-D04			9.04004	-1.43113	-1.09431	2	1314	Non-Horn
contig03216_a148	GGGAATAAACCGGACATCATCGCGTAAACACCGCGTAACAATGGCTTGATGCTTGAGGAATACACAAGAACAGTTTTGTGTGCGTGTTTGGATAGCGGTGGTGGTGAGTGTGTGTGTGTAAGTTAGGAGGGGAAAAGGCAGAAGGGGGCCCACAGACTATCAAAAGATTCGCTGTTTTCTTTTTTCCCGCTTGTAAAGAAAGAGATAGATTAATAATAACGTTGTGCGTGCGCATTATAAAAAAATAAACTATCCATTTACACCAATCGAKGAAGAAGTGGTTTTATTAAAAACAGAATAATTCGATTTGAAAAAGAAATGAATCTTTTGATAATTAAAGTGGTTTTTTGGTTGATGGGGTGTTGCTTGGTTGTAGGTCAACAAGTTACTTATACGTTT…	yes	contig03216	OtL001-D07			9.3979	-2.37159	-2.88695	0	804	Non-Horn
contig03258_a149	GGTCACCGCTCTGGGTRSATTGTTCAAGGTCATCGTTTCACATTCGAGGTGTAGATATTAGACAGGWGTCGCGTTAATTGAAAACTRAAAACTTCACTAAAGTGCGAGACGTCGTTGAATAAGTAACAAAAACAAAGTACTCGATACAATGGTTAAAGAATACACAAGAGAAGAGGTTAAATCACACAACAATAATCAATCYAACTKGGCTCATTATTCATAACAACGTTTATGATGCTACACCGTTCTTAAATGAGCATCCTGGTGGCGAAGAAGTTTTGTTAGAACAAGCTGGAAAAGATGCAAGCGAAGCRTTTGAAGATGTTGGTCATTCAAGYGATGCCAGAGARTTAATGTTAAAGTATAAAATTGGGAYGTTGGTTGAAGCCGATAGAACAG…	yes	contig03258	OtL013-F02			11.4223	-2.83619	-1.91203	0	797	Non-Horn
contig03319_a150	GTGTAAATTKAGTGCTTCGGTAAGCGTCCGCCATAACGGTCTAAAAATTCTTATTGAATAAGCGTGTTTCGCGTTTTCGTAATCAGTTTTTTTKGAAGATATCCGGTCTCCGTTAAATATCRTAAAAATGGTCGATAAAATCGAAATGAGTCTTGATGATATAATAAAGTCTAGCAAGGGAAGACGCGGTGGAAAACGCGGCGCCAGAGGGGGCGGCCGTCCCGGAGGAGGTGGAGCACGCCGTGGTACATTTCGGGGCCAAAAATCGCCCGGAGGCGTACAAAGAGGTCGTAATCGTGGCGGAATTGCGCGGCCGTATACCAGGGGAGACGTTAACAGTGCGTGGAAGCACGATTTGTTCGAAGGTTATGGGCCGAGAAAGGTCGCGGCGGCCGTCGC…	yes	contig03319	contig_377			10.5986	-3.17477	-2.79499	4	1220	Non-Horn
contig03337_a151	GTATTAAATTGGTTAACTCGACCGGAAAACCAATAAAATCATGGCTACAATGAAGGATAACCCCGAAAAACCAACGCAAGATGCGTCCCCCATCCATCGTATCAGAATTACATTAACATCCCGCAAYGTWCGCTCATTAGAAAAGGTGTGTTAYGACCTTATCAATGGGGCGAAGAAGCAAAAGTTGCGCGTTAAGGGGACCAATTCGTATGCCAACCAAAACGTTACGTATCACCACTCGTAAAACACCTTGTGGTGAAGGTTCTAAGACTTGGGACAGATTCCAAATGAGGATTCACAAACGTGTTATCGATCTTCATTCCCCATCTGAAATTGTTAARCAAATTACTTCTATTTCTATTGAACCTGGCGTAGAAGTTGAAGTAACCATTGCAGAYC…	yes	contig03337	contig_225			11.5294	-1.68164	-1.55648	3	464	Non-Horn
contig03343_a152	GGGCCRYCKGSRATCTATACATCAAATTAGTTAGAACCTGTAGCAAAATTGTTTATTTTAATTTTTTCACATCTTGCAAGTTTAYAAAATTATTTTTTCATTACGCACTYTAAAAACCTCTTAAAATCGTCATTTAAATAATGTAGTTAACCTCATTACGAACATTACAAATAAACATCTTAAAATAACATAACCTCATCTAACCTAAAAAAATATGAAACTAACGGTTTTAATTTTACTTCTTGTTTCGTTTGTATATTGTGACCTTAAGCAACAATCAAAACACACAGATGATATACTAGATCAGTTGATAAATCCGGAAAAAAAATCGACTCAATCAGCAATAACATCTACATCAACCTTTGAAGATATATGTGTAGTGGAAGGAAGAACGTTAAC…	yes	contig03343	contig_357			10.4688	-2.51332	-2.15495	4	645	Non-Horn
contig03354_a153	GGACTCGCAGGTTGTCGTTCGTCGGTAACACAGTGTGCTCTTAGGAGTCAACGAAGAAGCGCCATAAAAACGACGACGATAACGACAAACTTATATTATTATTAAATTAAGGGAAAACACCCTTAAATTCAAGTTGGTTTAGTTTTAACTGGGGTTTTCTTCAGTCTTAAAGGGCGTCTAGACGCCCGTTTTATATTTTTTTCAAAAAAGATGCGGTCGACGACTCTTGTTGTTACCGCTTGTGTGCTTTTGGTCGTTGCCACTTTAACACCATACACAGGGGCTACACCATACTTTCAAGATGAAGATGAAGCTTTGCCGTATGACGAAGACTACATAGATAATAATGCGTTGGATCGACTGTTGCAGTCGGCACAAAAACGAGCTTGTATAAAGCGT…	yes	contig03354	OtL007-C06			11.3075	-0.963814	-0.900683	2	1072	Non-Horn
contig03399_a154	GATTCTAGAACCTAACCTAAAAGGCTTAAAAGCACTGTGACATTTTACTTAAATTTCATTCCATATTAAATTATTTAATAATTCCGGTGTGTTTAAAAGATTAAAAATGAATAAATCATTAAAAGAAACGCTCACCGAGTTAAAACTTGATCAAGCTGAGTTAGAAAAGCTATCTAAACTTTCCGAACGTAGGAAAATCAAAGATTTGCTCACGTTGGAAGCTGCGAAAATCGCTACGCAATTGCAAAAACTCGAAGAGGAAGCTACTCRAATTGAAGCTGGTGGGGAAAATGTTTCTAAACCCGTTTCGGTTGTTGTTCCCCAAAGAAAAAGTTATGAAGTGAAATTGAATGAATATGCTTGGGGGCAATCGAAAACCAACGTCACGTTTTATGTTAA…	yes	contig03399	OtL005-B04			9.69922	-1.85143	-2.03252	3	775	Non-Horn
contig03504_a155	GGACATTATCAATAAAATGTCATTTGCAATTAGACAATTAATAAGGTATCATAATTTCAGGCCGATTTTAACGACTAATACCTTTAAAACACCCTTATTTCCAATAAAACGCGCAACGATGAGTTCTGAGGTAGAAAAGGCCCAAGGTGCTACATTTGACAATAAACCAACGAYTTTCGACAAGATCATCTCTAAAGAAATCCCTGCTGATATTATTTATGAAGATGATCAATGTCTTGCTTTTAATGATATTAACCCGCAAGGTCCTGTGCATTTTTTGGTAATTCCCAAGAAAAGAATTCCAATGTTGGATATGGCAGAACCAAGCGATGCCGAACTTTTGGGACAACTGCTGATTGTTGCTAAGAAACTTGCCCAGGAAAGGGCTCCAAATGGGTA…	yes	contig03504	OtL013-E07			10.1053	-1.61799	-2.47543	2	579	Non-Horn
contig03543_a156	TTTAATTCTCTAACATACTTTATTACATCCGAAACATCTTTTATCTAATAAACATCTATAAAATTCCTAATGGATTACCCAACCATGGATAAACATCAGGACAATCGCTACATTGCGTCATATATCTTAYTTCTTCACCCTTATTTAAAGTGCATACGGTTGCCTCACAAGTCGGTTCGTATGTATTTGGGCAACYAGGCCATAAGTTTTTCAAGTCTTTGGTTGTTGTTGGATTTTGAACCCATTCAATACCTCTTTGAACGGTTACAATATAGACATCATTGAGAGTTCCTAAGTAATCCAAAAACTGTTTATACGCTTCAAAATTAACGGGATTTTTATCGAACCACGCAGCATGTATATAAAAACCGAATGGGGCTTTATTGGAGGTATAATGAC…	yes	contig03543	contig_236			8.23983	-1.77787	-1.71292	2	851	Non-Horn
contig03621_a157	CTTTTATTKGTATATTTGACAGCGTGTATCACGACTGCTGTTTTTTACTGGAAATATTACCAGTAAACATGGTGAAAGCGTATGAAATTTGTGTGGGCCTTAATAAAGGCCACAAAACGACGAAAATCCCATCCAGCGATAAAGTACGCCCTGCTCGGTTGAAGGGGACACAGACGAAACACACCAAATTTGTCAGAGATTTGATTAGGGAAGTTTTGGGTCATGCTCCATATGAAAAACGCGCTATGGAATTGTTGAAGGTATCCAAGGATAAGAGGGCTCTTAAATTCTTAAAACGTCGTTTGGGTACACATATTCGTGCCAAGAGGAAGCGTGAAGAACTCTCCAACATTTTGACTCAAATGCGTAAAGCTCAGGCTCATGCCAAGTAAAGTTGTA…	yes	contig03621	OtL003-A01			11.1559	-1.33467	-2.7775	3	427	Non-Horn
contig03652_a158	GAGTGCGAGTGAGAAAGGAGAAGCGAACGTATATGAAACCGTGCAGAACGGAAACGAACSKATTCTAGTGCGATCCATCGCGTGRTCTTGCCAAAGTTTTTTTCTCAACTTTTTCCTACGTAATTACCAATAGTTACCACCRTGCCGGTACCAGCTCTACAAAAACCAGCCCCCGAATTCAAAGGGACAGCTGTTGTTAACGGACAATTCAAAGATATCAAGCTCTCTGATTATAAAGGACAATACGTCGTAATTTTCTTCTACCCTTTAGATTTTACTTTTGTATGCCCAACGGAAATTATTGCGTTTTCCGACCGTTTCSAAGAATTCAAAAATATCAAAACGCAAGTTATTGCTTGTTCAACAGACAGTCACTTCWCTCATTTGGCTTGSGTGAAC…	yes	contig03652	OtL003-C10			10.514	-2.39099	-0.924073	4	853	Non-Horn
contig03662_a159	GACAGACAATTTTAGAACTGTCAATTATGTAAACATAACCTAAAAAGTCAWTYACAAAAAAAAAAATTTTAAATCTCATATTTCCGTCAATTTCCACCCAATTTAGACAAATACCCCATCAAAATTAATCTAAACACCTAATAAAATCACAAGTTAATTTATTTTCAAGCAATCGTAACCTCAAAATCTCGAAAAAAATGAAGAAAATCAACCTAATTTCGCGACGTTTAATCTCACAAAGCACCAAATCACCAATAACGGGTGTTTCGAAGATACAACCGGTCGATTTGGCTTACGCTTCATACGAATCGACGAATCTTGGTTATGGACCACCGCCTCTCGTAATAATGCATGGTTTGTTAGGATCGAAAGGAAATTGGAACAGTTTATGTAAGATAA…	yes	contig03662	contig_215			9.58879	-1.74258	-1.65027	3	1149	Non-Horn
contig03712_a160	GGTGACGTTTGATGTAAAACCAGCAAACGTCAAAATAAKAAGAAGAGAAAGTGGCCATAGTTTTTGACATCATCTCGGGAGTTTTCAGTGTTTTCGACCGTGCTTCGACGTCGATTTATGAATAGTTGACGCCCAATTGGTTATTTTAAATGTGTAAAAGCTTTATAAAAATCCACAAAACTCATTTATAAACCAGTGCGGTTAGTTTTTTGTGTCATTTCCCGGCGTCAAAATGTCGGATGAGAGCCAACCAAAAACTTTATATGTAGGCAATTTAGATGGATCCGTTTCGGAGGATTTACTTTGCGCGTTATTCTCGCAAATAGGCCCCGTTAAAGGATGCAAAATAATACGTGAACCCGGCAACGATCCGTACGCTTTCGTAGAATTCACCAACCA…	yes	contig03712	contig_327			10.841	-1.94271	-1.81212	1	1330	Non-Horn
contig03717_a161	ACATGCAACGGACGTGATGGAAACGCCCGGATGGAAGTCGATGATCCTAACGCACCCGCATTTGATAGCGGAGGCGTTTCGCGCATTAGCAACCCAACAGATACCTCCGATAGGGCCGCCGAGGAAGCGTGTCAAACAGAGCTGAAGCGTCGCCGCGTCAAGATGGTGCCACGCAGACTGCTTATATGTGTTCAAAATGTAATATAATATACATAACATTAACTATCTAAAATTAGGCACACACGGACACTTGATTCCAGAGAAAAAAAGTGCTTGTATCGCTGTAGTTTAATTTCCTTGTGGTTTTACTTCGTTGCGAAAGTTGATGAAATAAAAAAAAATTCTTGTAAACGTAGGTTCTAACTAACAAAGAAAACAGAATTGTGATATAAATAGACC…	yes	contig03717	OtL011-G06			10.226	-2.23371	-2.10491	1	950	Non-Horn
contig03725_a162	TTTTGTGCCCAATTTTTGAGTTGCTAAACCACCGACTATTTGCGAGATTATGTACGCCCAATAAAACGATGCCAAAACGTAACTTTGTATATCAGCCGACCATTGCAAAGTTCCCCCGTAATCCATTAATTTATTATTCGAAACGCTATCAACTTCCTCCGGTTGTTTAACAAAACAGTATTGGTCGGTTACGTTTGGATCGGTTTCTTTTTGCGGTTCTTCTACCATTGCGACGATTGCTAAGTTGATGTCGGTACGCATCATAAATGATACTAAAAATCCAGACCATGATAATAAATACAGGACGAAACGGGCCGGAACTTGACCGAAAATTCGATAAATCAAACATTTTTTCGGCTCCTCTCTAGGATAGCTCAAATCGTTATCGTAAATCTTTTC…	yes	contig03725	OtP012-E02			9.2971	-1.83145	-1.00863	3	877	Non-Horn
contig03743_a163	TTCCTTAATTTTTTGRGCACCGCAAAGGAACCACAAACATTGCTCAAAAGTTCTGCTGTCGTTTGCGTTTCGTATCCATCGCTTCCAAGATAGGTTGTCTTTTAGTTTGATATCGTCTTCTTAACTCGTCTATTTCCCTCTCCATTTCTGCATCTAATATCGCCATTCTTTGTTGTAATTCTTCGTAACTCAAAAATTTTAAAAATTCAAAATCGCCRTCTGAAAATGGTCGTTGAAAATTTGGTCGTACTTCCGGTTGTTGAACCGCTTGAGGGGATGGCACTATTTGTAAATGAAAGTGACTTTGAAACCTTTGTTGTTCATCGGCGTTAACATCACCGGTGCTGTCTAATGTTTGTGGTGTCGTGACGCCGTTACCCTGTTTAATTTCCGCTTCTT…	yes	contig03743	OtP008-C05			10.0353	-2.7281	-1.71607	2	731	Non-Horn
contig03765_a164	AATGTACAACTTTATTAATTAATAATAAAAATAAACAAATAAAAACATGACTGTTTATTATTATGTCATTATTATTGTTGTTAGATACATTTCAAGTCTTAAAAGAATAGAAAAACTTTTAATTAACTCTTTCCGCTTAAGCGAGTACAAATAACTTAATTATTTGTTAAAAACTATAATTAATTAACTAAACTCCTTCATCGTTTAAATAAGATGTAGCTATTCTTTCGAGATCGTCCAGACTCAAACTTCGCACCTTCTCCTGAAAATCTTTCATAAACTCYTCAATAATCACGTTCGTTYGATCTTCCGTGTAATAATTTTTAAAGAACCTCGCCAAAACCACATTAAGAGACTCCGGTTTCTTAATCACTAAATGTAACTTAGTCCCATCTTTTA…	yes	contig03765	contig_111			8.93398	-1.0035	-1.5624	3	678	Non-Horn
contig03862_a165	GAGTTGTATCGCAGCTTGCGATCCCGATGGGTGTCGTTCCTTCCTTTAAAGTTGAGTTGAAAGCGTTTCAAGAAAAGCGTGTTTTGTTTCGAAAAAAATTGAATAAAATTTTTTTTGAGTGAAAAAAAAATTTCATTACGGATTTTTTATTTTGGAGAAAAAATTTAAGTGATGTCGACCTCGAATCAGCGATTTTCGTCGATGCCCCCCGGCATTCTGGACTCTCCTACGCTCGCCAGGGTTGAAAGAGCAATCTTGCGACACGAGCAGGACGTTGTACTCAGGAATGGGGGACATAGGGAGCACACCCAAAGTAGTATCCCTTATCAACAGTCTCTTCTTTCTAATTATGGGAGAGAAGGTCATACAGCAATAAAACGTGGATTATTATGGCAACAA…	yes	contig03862	OtP004-E09			9.66264	-1.1476	-2.06876	3	780	Non-Horn
contig03878_a166	GGACCCGACGCTCGTCGACTCGAAAACCTGGCGGCGTCAGACCGGCTCCAGTCCGCTCACGCACCCGCAGCGATATCTTCACTTTCCACTCCCCCAGATGAGAGTGCAGAGAATCGAAAGWMYTTTTTTACGGTTTTTTAGAGAGTAGTTATTGAAAATACAGACTTTAAGGTAGTTTTTGAAGAAAATAAGAAGAAAAACTAACTTAGTTGAAGACGTAGAGGACGTTGAGAAGCGTCGTTTTTCGGCGCCGAAATTTCATGGACTTCTTGTTGAGCTACGGCGATCTCTTCCCAACAAGACCCGGCAAGAACGAGATGGCGCCGCGACGCCACCAGGTGACCGCCTTACTCCTAGAAGACGAGTCCTCCACGTCTCCGACCTCTGGTTTAACCCGGT…	yes	contig03878	contig_288			9.90754	-1.42017	-1.5659	3	793	Non-Horn
contig03894_a167	TATATATCATATTTATTTGTTATAAATCAAATTGTTACAAATCGACTTCGGTAAAATCACAAAATTTTTTTAACCCCACACAAACTCTTCTACCGAACTCTGAATCGACGTTTTTAAAGACATTAATTTGTCTTTCTTGTATAAACGAAGAAGCATTCTYCAAATCATTAACAATATTCTGAATAAGTCTCGTTTTTGCGCCATCATCTAAAACAGTTTGATAAAAAATTCTKGGTTGGGTGAAGTTATCMTCAAATCCTAAATCGTAAAAACCGCTAATTCCTTTCAATTCCATCGAAGGATAAAGTAATTTAGCTCTGACGCTTTCTTCGGGTCCTCCAAAGCTGTTTGGGTGATAATTTGGAGCCCCCCCTTGACTTCGAATTGTCATAAACCCAT…	yes	contig03894	contig_67			9.81871	-0.173398	-1.69646	4	1605	Non-Horn
contig03907_a168	TTTATAAATCGCTCTGGGGACGTGTCTCGATCCAAGATTTGATCGCTGGAACGGAACGCACGTTATTAGCGACGGCTTGCAAGTTGGGATACTTTTCGATCATATTGGTTCCAAGCATAAAGTTAAGATAATCCAATAATCCGGTAAAATAGATATCGGCCCACGTAAGTTTTTTTAGCGCGAAATGACCGTTATTTTTCTCGGCGATGCTTTCCAAACGCGTCAAATAAAACGGAAGYGTTTCCTCAATTAACGGACCTTTACGAGATTCTTTTACTGCCGCGTCTTGTTCATACCAATAATAAGCAATTTTTTGCCGTAAATCATTAATTGTGTCTACAACGGAGTCAATTTCTAAATTTTCCCARTCGGAATCTCCAACCAATTTAACTTTTTTAG…	yes	contig03907	OtL013-G02			9.38304	-1.05151	-1.12158	4	710	Non-Horn
contig03931_a169	GATAGAATCCAGCGCATGCGCCGTTTKRACCTCACAAACGGGGATACGGGAGTTCTCGTAATCTCTCAAAATACACTCAAAAATGATTTAAAACTACTTAAACAAACATAAAAATCTCTTCGTATTCATGTTGAACGTACGACAACCCTCGTTGGAACTTCAAATGGACGATGAGGCCGTAATTGCCACAAAYGATGATGCTAGCGAATGTAAACGTGGAGCGGTTCAATTGGGGTAWTGGGAAAGATAGATATGTGACACAATTTATTAAAACTTCGCATAGAAGGGCTCCGGAAATTAATCGGGGTTATTATGCCCGTGTTAAAGGTGTTGAAAGGTTTATTCATAAATTTTTAGAACGAGCTGGAGATAAAGCTCAAATTATAAATTTGGGGGCTG…	yes	contig03931	OtP014-C05			10.399	-2.70523	-1.78048	2	1216	Non-Horn
contig03989_a170	GGGGTGATCAAAGTTCATTTTGCACACAAACTTAACACCGACCAGTTTTTTACTTTCATCGGYGCTTGCAGTAGCYGTTCGATTTTTTTCAAGTGTTTGATTACATTTTTATATTGTTTACTTTCGATTTAATAACGGTTTTTATCTTTTCAACAAAGATAATGAGAGACGATTAAAAAGAGATTTAAGCCAYCGAACCATCGCCTYGACAGACTTATTTTTGTTTTTGTGTTCGTCGCGTTGTGCGTGATCTGTGTATTTAGAATGAATATTTCCCGGCTAAAATTAATTACTTTCGACGTAACGAACACGTTGTTAAAGTTACGTTCCAGTCCCGGCAAACAATATGGTGAAATTGGCGCGATTTACGGTRTATTACGAGATGATAACAAGTTAGCG…	yes	contig03989	OtP009-B06			9.21833	-1.93556	-2.28022	3	911	Non-Horn
contig04073_a171	GTAGGAGGTGCTTTATCAGATGATATTTACTGCATTGATACGTTAGTGATGTTCAGAAATTTACATAAGAAAAAAATTGAAGCTGATATGATTCTTGAACAGGAAAAAGCAAAATTAGCAAAGCCTATTCCTGCTGAACTCTGCGACGGTTTTGATGAACTTCTTGTTGCAAGTGTAGAAAAATATGAGAAGAGTATACAAGAAATGAACGAGACTACACCTCGTAAAAATAATAACCAAAGAATTGTAACTGATCCTAATTTAAAATTAGAAGATCTATATTTTAATCCAAATACTTCAAATCCTACAACTTCAAAAAATGGAGCTACTATTCATAATGAAGTAAAATGCAAAAAGAAATTAATTAATGAAAAAATCAGCTTTAAATTAGTTGATATT…	yes	contig04073	OtL001-F01			9.94496	-0.187323	-0.320366	4	874	Horn
contig04120_a172	TCAACCAACCGATATGGACGCAGGGAAAACAAAACGGGGGTAAAAAGACGATTTACCGAACACGCCGTTTATAAGGGATTTGGTTCAATTTTTTATTGAATCGGAATTGCATGAGCATGCTGCATATTTAGTTGATTCATTAATTGAATCAAATACAATGATGAAAGATTGGGAGTGTATGACTGATTTGTTGTTGGAAGAACCTGGACCGTTGGAGGAACCTTTGGATAATCGACAAGAAACAAGTTTAATTGAAATTATGGTTTGTTGTGTGAAACAAGCCGCTACGGGGGAAGCACCAGTTGGAAGAGGGCCAACAAGAAAAATTACTTCTTTGAGAGAAATTAAACTGGCTGGAGAAGATAAACAAAAATTAACGGAACATTTTATTGTAACTCT…	yes	contig04120	OtP015-B05			9.87166	-2.66625	-1.42579	4	1330	Non-Horn
contig04163_a173	AGCCGTATTGCAAGCACAGTCGAGTTTTTACCACCCAAATTGGATTGGTTACAAGTAATGTAAGAACCCCAGCTTCCGCTGCCGCTATCATATGCAACGATGGCCCCAACGGTTGCGCGCTATCACCCGCTTGTATCCATGTTTTTATTGTGTTGTAGAACAGGAAATAACAACCCCATGCACTGCCGGAACCCCATACGTTCGGAGCAACACCTCTATATAAACCTTTTACACCTTCCTGTTTAACTATTGTGTAGAAAGCATTTGTTAAACTACTATATTGTGGTATTGTTGTTCGGCCGTCGCTTACAGCAAACCTAATTTTCATCAGATCTAAAGGATGCAGGATAAGCGTTGAAATAGCACCACCAGAAATCCCAGCTAATAAGTGCTCATATT…	yes	contig04163	OtP017-G09			9.31796	-2.36615	-1.93078	1	745	Non-Horn
contig04198_a174	TATTATAAAGTCATAAAGAAGAATTTAGTTGTTTTATGTTCTGGGTTAACACCACCAAATAAAACTAAGCTTAAACAAATGTTAGAAACTCTAAATGGTAAATTAGTGAAAGAATGGGATGAAGAACTTAATTATTTAACTGTTGATAAAATTGTTTTAACCTCAAAAGTAATTCAAGCAATAATCGAAGGTTTACCAATAGTTTCCTTAGGATATTTCGAACAACTTCAAAATTGTATCAAAAATAACCAAATCCCACCAAATGAAAAAGAATATTTGCCAAAACCATCAACTATTTTGCTAAAAAATTTAAATTTCGATTACAACCCAGAAAGAAAAAGTTTATTTAAAAACAAAGTATTCGTTTTTAAAAGAAAATCGAATCTAGACGACATTATT…	yes	contig04198	OtP012-H01			8.76955	-1.10097	-1.43098	0	1156	Non-Horn
contig04240_a175	ATTTTCGATTTTTATTACAAAATATTTACAACCACATTTAAGAAAACACAATAAAATAAAATTTAACAACAAACTACAAACACCAACAGATCACAGATTAACCAGATTACAAGTAAATATTAACAGAAAATAACTGAGGTAACAGTAAAAAAAAWTAAGATCAATAGAACATGTTAGCCAAGCATATATTAATAAAATTAAATAACTGGCTTTAATCGATCGTGCAACTTCACGCTTTGACTCCTTCCTATTTTGTACCTATCAGTATGCGTCGTCCTCGATTCTTATCTTCAAAACCATTTACCATGTCCTCCACCGCCGCCGGCATTCAGCAGAAGAGCTAGATCATGGCCACCATCATCATCTTTATGATGGATGGTTTTGTAGATTGTGTGCGTA…	yes	contig04240	OtL015-E01			10.0726	-1.17182	-0.961614	3	573	Non-Horn
contig04244_a176	AGGGGAGTCCGCTCTGAAACGTCGCCCGGAGACCATCTCTCGTGTACGACAAGCGAGTTGTCGGCGGCGCCCCCGCGTACCAACTCCTACAACGTACGACGTCTACGGCGGCTCTTTTGTCCGAAGCGCGCGCGTGTATTGGTGTATGTGACCGTGTCCAGTGGCGCCAACTCGACGCGCTCTCTCTTCAATCTTTACCATTGCTGCGTGTTTCTTTGTCGAACAGGACGTTTTACGCTGTTTACTATACGGATGATGACTTATAGTAACGGAAGGACTATTGTCACTTCAGCCGAAATGGACCAAACGCCACTTTGTCCAACAGACGACGACTTCACCGATGAGATTCATTCTCCAACTGGAAGCAGCGAGGATAGCGTCGAAGTTAAAGTGGAGGCG…	yes	contig04244	OtP012-B02			8.8284	-1.49145	-2.18507	3	518	Non-Horn
contig04247_a177	GGGGGCCGACAATTTTGCGGTTGCTGCTGCTGGTGTTGTTGACGAGATACGATCGGCGGCAAAACGAATTCTAAGGGGAGACTTGGAGAAACTTGCGGAGATAAACTTGCGCGTTGATTCACGTGATGAAACTCGATGTTGCCCCCGGTAAAACCATGCAATGAATGACGTACGTTGATCGCCGCCGCCGCACAACATGGTGTCGGGGGGCAGCACACGAAATGGTGCTGACATTTTGGACATTCGGCATTACAGCCTAACATGGCAAGGGAATGCCATGCCAAATTACACTCCACCTATTCTAAAATAGTGTTTTCTGTGCGTGCTCATATCAACATTAGACGTGATAATTTACAAATCGGCGGGTTGATTTCGCGAGGGGTGAGTAAAAATAATCAC…	yes	contig04247	OtP012-G10			8.87367	-1.53911	-2.11102	3	706	Non-Horn
contig04283_a178	AATCATSGATCGGTTGTCAAAAAGTGACAACTAACTTTYGTACGTGTCACTTCAACACTTCGTTTTTCGATTTTAACCGTTTCGAATCAGTTTTTGAATTAAACTCGTCGCGAAATCATCGATTTTTGTAAGAAAATGGTTCAATACGGCGTAATAATCGCGTGTTTCGCTTTGTTCGCGTCGAGCTATGCCGAAACTTGCAGCCAACCGAAGGTAACCTCAAATTCGTTTACRACWCAAGATGCTACGATTGTATCGAATATTGCTTATATCGCCGAATTTGAAGTTGAATGCACWTCGGGGGGGTTAACTAATTTGTATGCTGAGGTTGATGGAAATGTTGTACCTGTTTCTAGTACTGGGCAAAATAAATATCAKGTTAGTTGGACCGAAGTAAAC…	yes	contig04283	OtL019-A09			10.0143	-2.28077	-2.83678	3	631	Non-Horn
contig04313_a179	GGAGAAACGTCATAAACGTCACTTTTGTGTACACACATTACTCATTTTGTTGCGTTAAAAATTCCATTTCTTAGAAATCTTACGCAAATTTAAAGTGATTGTATTCGTTTCTCGCCTAAAAAATGTCGTTAAATACGGCCCACATCAACGGGGGGGTTCTAATTCATAACGGGGAGTGTATTTTGGTGTTCTCGGACAAGGTCACGATCGAATGGCTTGAATCAACCAACGACCCGGCTTTTAAGGGTACTAAAAAAGGGAGGATTTATTTAACAACACATCGAATGATTTTTAATTCGTCAAGTAACGATGATAAAATGCTCTCGTTTAGTTTCCCTTTTGTAACTTTGTCGAATGTTGAGATTGAACAACCGGTTTTTGGGGCCAATTTTATTAAAG…	yes	contig04313	contig_303			10.1468	-1.45931	-1.7424	3	1143	Non-Horn
contig04317_a180	TAGATTCTTATAAAGGATAAGTTAAAAAGAGATGGAGCTAAGTTTTAATTTTTGACATAACATAACCTAGAAATGTCAAACAATGACAGTTCAAAACACAACAGAGTGACAACAAGGTTTTTGCCGGCGTAATTTTCGACGTAAAACCGATAATCATATAAATTTATAGTATTCGTCATGTCTGAGAARCCTCCTGCTTTGTTCGGGTGGGATTTGTTATATCAGAGTATCGAAAAAGATGTAAAAACCAACCAAGACGTTCTGGTATGTTTTGTCCATTTAATTTTAGYTTCAAATGGATTTAAATGTATYGGAATTGGTGAATCGAAAACGTTGGATGGTACGGAATCGAAAACTGARGCTTTACCATCTGGTTGGAATGACGGTTATGCTATACGT…	yes	contig04317	contig_138			10.1107	-2.33004	-2.01841	0	1096	Non-Horn
contig04366_a181	AATCAAAAAAAAAGTTTTATTCTCCTCCTCATAAACAAATTAACTTAACCATTAAAGTTAATTTAATTTATTTTTTACTTGATAGAATAATTCCATCATATTTYTGTTGGAACCATTTCATTGCATCCTCTTTAGTTAATCTGTGTGGATGTCCAACTTTCCCTTGCTTCCTCCTCCTATGGGCTACATTAAATCCAGGTCTCCCCAAAACAACGAAAAAGTCCAAACCATAAATACCAATACTTGGGTCATATTTAATCCCTAAATCAATATGTTCTTGGATTCCAAACCCAAAGTTACCAGCATCTGAGAAATTATCCCTTCTCAATTCGTATTCTCTCACTTTTAACCCACGCTCGAGGATTTCTTCAGCTTTGGCCCCCCTTACAGTGCAATGTA…	yes	contig04366	contig_155			12.4888	-1.64059	-2.1022	3	664	Non-Horn
contig04372_a182	AATTAATGTTTCAACAATTTATTACTAAGCTTGTTTACTCATAATCGGTTTAAAACTCAACGTGATTATAAATAAAATCACGTGATTTCGGTTTCCTAAAATCAACTTTTTATCTGCATTAAAACGTCAGTTGTGTTTGCTGTTGAATTCCACASATCTATTTTATTATTAAAACAACAAACAAAAAGGGGAGATAATAATGTAATTCGATACAGTTCTATTATTTCTAAATTCTAATAGTATTGGTGGTGATGTGCTTAAAAAGATTACAAAAAGGAAGTGTTTGAAAGGTTATGTCGGTGTAAGTCAAGGTTTTTGGGTTAATTAAGAAGAAATTAAGTGGGTTGAAATTCAAGATGAATAGGAAACCAGCGCCTAGTTATGGGGCCATGGAAAATA…	yes	contig04372	OtP012-G11			9.64295	-2.08462	-3.06335	0	1198	Non-Horn
contig04384_a183	CTGGCCTTTATCACGCGAATACCAGTTGAATATAATAGTCATACTTAAAATGTCGAGATAATTACGTTATTTTCTCATCAAATATTTTTTTAATTGGCAAGTGGTATAATAAATAACACTTTAGATTAGAATTTTCATTCATTCGGTTGAAAATTTTAAATAATCATCACGAAAACCTATTTTTAACTTTTTTATAAACCTAATCATGTTGAAACGAAGTTTATGTGTTTTTTTGGGATTATTTTTTATTGAATTACTTAAAGCTGAAGAATTACCGAATTATATTAAAAAATGTAAATTGTCCGATCCAAATATGRACGAATGTTTTGTTAAAAACGCCAACGATGCCATTCCAACACTCGTTAAAGGAGACCCAACGTTTAAATTAATCAATATGTC…	yes	contig04384	OtL017-F10			9.9414	-2.10829	-1.95433	4	1014	Non-Horn
contig04411_a184	GCAAATCTTGGTTTATTTCAGCATGCAAAACACAAAAATTCATATACAAATTATATTACAACATTCAGATATGATTATAAAAATAATGATACAATTATAATAAAACATTTTGCAATATATTGAATGTTATAAAAAGTTTTTTATTTAATGTGTTAAATAGAAATTTTATTAAATATAAACTGGGCATTACGCAAGAATTATTTTAATTGAAGATCAAATTATAAAGAAAGAAAAGAAAAAAATTCTTTACTAAGCCTGCATAGCCGCTCTCATTTGCGCTTGTTGAATTYGTTGTTGGAATTTTTGTAAGGTTTCTCTGGATGTGTCTTGTTTCTTTTCAATGCCAGCAATTTGTTCTTCAACTCGTTTCATTTCCTTGCTAATGTATTCTATCCTTTT…	yes	contig04411	OtP020-C03			10.1442	-2.03444	-1.28162	3	746	Non-Horn
contig04439_a185	GACAGKSATAGCAACGGGTTCAGTAGCACGACATGTCGCCGAAGACCCATTACCAACCGTTAAATACGTCGCGTTCGTGTACTTTGTTTCGTTATTTTTTTTTGTTTTTTTTTTTCGGAACGAATTAAAAAAACTAATATTTAATAAATAAGAACGTTATTTTGTAGTGGTGATGGTGATTTGAAAAAAAAAATTTTTTTGTAACTCAGTGAGACTTAAAATGTGTGATTAAAATAATTAAGTGGGGGAATTAATTTTGGAAAAAAGAAAATCATGATGCCTTTGGCACCGACACCTATAGTAGCGGTACCTTCRAAGCCAAAAATTGGTTTTTCAATARATTCAATTGTTGGKGGTGGTGGAATAAATCAGTGTASCCCACAACATTCACCGGTTCAA…	yes	contig04439	OtL005-D02			9.4283	-1.7236	-1.42578	2	1252	Non-Horn
contig04446_a186	CTTCAAAAAACGTATTTAGTTTTAATAGTACCCGATAGGTGGTTTATTCATTTAAATTTCTTAAATATACCAACATGAAGTTTGCCATCACTTTTCTTTTCACCTTCACCATAATCGCATTGGTAAATGCTGGAGGTTATGGTTTATTGGGAGGATTAGATGGTTATAACAACAATTATGGAGGCTATTCCGGATATAGACCTGGTTATGGGGGATATTCCAGTGGATATAGACCTGGATATGGAGGATATCGCCCAGGTTACGGAGGATATGGTGGTTATAGACCTGGATATGGTGGTTATAAACCTGGATATGATGGTTACAAACCGGGTTATGATGGTTATGGTGATATAGGTGGTCAATATGGCGGAGGTTATGGTGGATATGGAAATTATGGTG…	yes	contig04446	OtL018-G07			11.6461	-0.419186	-0.927818	3	612	Horn
contig04492_a187	CTACATTTGTCCACATTGCATAATAGTAACGGGTATTTTAGGTTTATTATTAGGCCCTGTAGGCACATTTTCAATTTTTCTCATAACCAATAACCCRTCCATAACTCGTCCAAAAACAACATGTTTTCCGTCTAAAAAGTTACATTTTGAGCATGTTATAAAAAATTGACATCCATTTGTATCTTTTCCACTATTAGCCATTGATAATAAACCAGGTCCATCATGTTTTAAACTAAAGTTTTCATCTGGGAATGTTCCACCACCATAAATGCTCATCACRCCCGTTCCATCACCATTCACGAAATCTCCACCTTGAATCATAAAATCTTTAATAACCCTATGAAAACCAGCTCCTTTAAACCCTAACGGAACACCATCTTTTCTAAACTCCCCAGTACA…	yes	contig04492	OtL011-A12			8.81995	-2.34695	-2.34531	3	656	Non-Horn
contig04522_a188	CTTATCGTCAAACCAAATTCTTGTACATNAGCGTCGTTATTAAAGTCCGCCCGTCGAACTAAATTGTTAATTTCCCTTTCACGATCCGGCGCCGATCGTGCTGTGGCTTTGATCATAGTTGAAGTTTGCATATCGGTTAATTTCTTAATGCATCTTTGCCCCGCTACGATATTGCACACTTCTAGCGGTAAATACGTGTGTTTGTGTTCTTGCCCTACTTGTAAACACGGTAAATGTGGATACCGTAATTTCATTTTATACTTGTCCAAAAAGTACTTAGCCACAGTACATTCCACCGTTTGACCATTGTCGAGTTGTAAAGGAAAACTTTGCATCTGAGCTGGACGCCGAGTGACATTACAAACGCGATATTTACGTCGCATCGTGCCACAATGGGTT…	yes	contig04522	OtP020-H08			11.0673	-1.52426	-1.83501	2	783	Non-Horn
contig04562_a189	TTTTTATGATCTTCCTCTCGCCTTATCACCAAAGCCAAAGGTTTCGGGGAATCCTCGATTTCTTGCGGACTTTCCGATCGAGAACTGAAGCCGATGAACACGTCGAAGCCGTTCTTTGAGGTATCGGTACTAACAGAGGTAAATTTTGGGTACTTTGCGTGGCCGGCAACAAAAAAATATCGCCGTTCGAGTTAGGAACTATTTGTATTGAGGTATTATTGGGTAATAGGATCCTGGGATTTTGTTGGATCTCGTTCGTCGAYGGTAAAACGACGGGTTGTTGATTCCAACAGTTTGARATGTGGTGTAAAAGAGTTCTTTTCGCGGATGGTTCTAATCCGGGAAATTTTGAGACAGCGTTCGCGCAAACTGTAAATCCCGCTTTGAAATGACCCGCGC…	yes	contig04562	OtP015-H03			8.94156	-0.999111	-2.78343	2	814	Non-Horn
contig04592_a190	GGAGTSAGCTGTTGCGGTACGAACGAGAGGGACGACGCAGACCGACCGACGCAAAACTAACACAACCTCCGTCGAGTGCGCACCAGACAGTCAGACATCGCAAACGCCCCCGATATCTATCAGCTCTATCAGTCAACTTGCTACTCTTCCCAACCAGGCGCCCCAAGTCTCGTGTTTTATTCAATCGAAGTCTTCKAACCCCATTAAAATTGCGACCACGATGGCCACCTACGCTACATACRGACATATCGAGCTTGACAAAGTTGGGCACAGTAAAAAAAGAGTACGCAATCCGCCCAGCGATATTTTGAACGTTATCTGCACTCCTCCTTCAAATCATATGAACGGAAGCTTTACTTCCAGAAGATCGTTGCATGATAATTCTTTTAAGAGGTTGTT…	yes	contig04592	OtP018-B06			12.5265	-1.40367	-2.5558	3	1076	Non-Horn
contig04631_a192	CTATCAACATTGATGGGATTTACAGTTATGACTGTACTTATTTTTTATGTGTAAATATTGACAATCAAAGTAACTTAACAAAATGTGATAATAAGCTTTTCTTAGATATTAATGACAATAACAACTTTGTTATACAATTTATTCTAATTAATTTATCTTATTTTTACAAAACGACTTCTCCACAATCCTCAACCTCCATTCCAGCCTCTTCCTCATCATCCTCACTTTCACTAATTCTTTGTTCTTCACCAACTTTAGCCTTTTTCAAACCAGCAGCTGGAGATTTTATTAAAGAAATATCGCGTTGCACCTCTTTAATATCCCGCTCATTCTCCAATTCCCTGCCCTTCCTTAACCTTTGCATTATGAAATTATTCTGACGTTTCTGTTTGATCGTTT…	yes	contig04631	OtL005-H02			9.92142	-1.72826	-2.40174	3	733	Non-Horn
contig04637_a193	GACCTAAAAACTTTCTTCAGTAAGATGGATCCTTGGAATAATTCTTATTCGAATTCGCCCACTGAGTGTGCTCAAAAGAATTTCGAGGATGATTTCCAACCAAAAATATTCGAGAAATTACCCGATTCAGATCAATATCTAGCTTCGTTAGAGGCTAAATTGCATAAAATCAAAACTGATCAGGACGTTATAAAACAATTGCAACAAAAACGAGAGGAATGCATGAATCAACTATTAAATAATACTCAATATTCCGAAGATGTGGATCTCGAGCTGGATGAACCCATTGAAAGTTCAACCGTTTTARGGGCGATTACGCCACAAAAACAAGCTTTAACGCAAGGAGAGATTGTTGAATTGGTTAAATACGATCAATTGAAAGAGGACGATTCCGAAGTA…	yes	contig04637	OtL002-C01			10.3498	-1.34485	-1.58921	2	943	Non-Horn
contig04667_a194	GGATGTTTACGTTTACTARAAGAAAGTAAATAAGTTTTATTTTAATTTAATGTGAAATGAATGAAATAGAATTAAAGATTCAAAAAAGTATTGTTCAACTTTGTAAGTTTCTTCCTGATTTTGTTAATAAATGGAAAGATTTATTAAACGAGGGTAAAAAACCGATTCGTGGTTTACTTAACCTCTCTGAACAGTTGAGACATGTAGAAAGTGTAAATAAAGCACATGAGGAAGATTTTTTTGAGATGCAACAACGAATTTTATTTAGCATTTATGTGGGAATAGAAGAGGAAATGGAAATTATTAAAAAGATACTTGATAAATTAAACAAACTCAATAACGATATGAAAAGTAAATTTTCCACGATTGAGAATGCCTCTTTATCGCTCGACTTTGACG…	yes	contig04667	OtP003-D11			9.58874	-1.52125	-1.06882	3	712	Non-Horn
contig04669_a195	GGACAGTCGGACTTTTTGCGCCTCACGGAAAAGTACCGTTTCACTTTTAATTTATATTTTTTCATAGTTTTTTCTTAATTTTTGTTCTTTTCATTTAACAGTTCATCCTTTTGTTTTCTTAACGTTTTGTTTCTTTTTTACGATGATCCTTGTTTAACCTCACTTTTCAACGTGTTTTCAAATTCCCTTAACAAATTTTAATGTAAACAACGTTCCGATTCGAGGAAATGTATCAACTAAAATGTACACAACCCCTTTGCGACCGTTTTTATAAACTAATTACTAAATCAACTTTATTTCTCCGTCTCAACATCTAACCTCTTTTGACGTCGTGCCTATGAAGAAGACCATACTGGTCGAAACAATTGTCGCACCGAAACATAAAAAATAAAACAATCA…	yes	contig04669	OtP011-C12			9.36006	-1.4029	-2.50556	0	1200	Non-Horn
contig04682_a196	GGGAGTATCCGCACTGATGGCTGATTGCACAGATAGGTGTATCTCAAAAGTCACTTAAATAATTCTTTAAATATCTCGCGACGTTCATAAATAAACGGACGAATTGTTTAGTTTTCTCGTTATTTCTGTCGTTCGGTGACGATGTCGAAGTTAGGTGATAAACAGAATTATTCGCAAACTTACAAACTAGTTATAGTCGGAGGTGGTGGTGTTGGAAAATCAGCGATAACCCYACAATTTATTCAGAGTTATTTTGTAACAGATTATGACCCAACGATAGAAGATTCATACACAAAACAATGCGTGATAGACGATATACCAGCAAAATTAGATATTTTAGATACAGCTGGGCAAGAAGAATTCAGTGCAATGCGAGAACAATACATGCGATCGGGTGAA…	yes	contig04682	OtP018-E03			10.1967	-2.24165	-1.29491	2	889	Non-Horn
contig04690_a197	GAATCGAGTTGTCACCGGTGTCGTTGACTTTATAGGTTAGAAACGCAAAATTTATAAGAAATGGCTAAAGTAGGAGCTGTTTTGAAGAAATTCTACACAGAAKACSCTACGAAAACGCCSAAAAAATTAAAAATTATTGATGCTTACCTTTTATACATCTTACTTACCGGGATCGWTCAATTCSTGTATTGTCTGTTAGTGGGGACATTTCCCTTCAATTCCTTTTTGAGTGGTTTTATTTCTAGCGTAAGCTGTTTTGTCTTAKCAGTTKGTCTTCRTTTACAAGTTAACCCAKAAAATCGCARTCAAWTTGTTGGAATAAGCCCAGAAAGAGGATTTGCYGATTTTATATTTGCTCATATTGTGCTGCACCTTGTARTTATGAATTTCATTGGTTAA…	yes	contig04690	OtL015-H02			9.30468	-2.17609	-2.02137	3	507	Non-Horn
contig04710_a198	GGAAGTAAAATGGCCGCTGGAAGTGAATGAGGGAGAAAATTGAGATGGCTGTCGCGAAACCTGTCAAAACGATCATCAAAGGAACAATAAAAATCTGTAGTTTAGCGTGGATCGGCTTTGGGGATTCGGTTTGTTGAAAAAGTGTTCGCGTGTGTGGCGTAAGGACCGAAACAATGCGTGAATTTAAAGTAGTAGTCCTCGGCTCGGGTGGGGTTGGCAAAAGTGCGCTAACGGTGCAGTTCGTGTCCGGGTGTTTCATGGAGAAATATGACCCGACGATTGAGGATTTCTACCGGAAGGAGATCGAGGTGGACAGTTCTCCCTGCGTCCTGGAAATTCTGGATACAGCGGGTACGGAGCAATTTGCCAGCATGCGCGATCTCTACATCAAAAACGGGC…	yes	contig04710	OtP003-A12			11.1488	-2.12909	-3.11612	3	708	Non-Horn
contig04711_a199	TTTTAATTCTTCATTTCCTTGAGCAACATTTTTTAAAAGTATTTTGTGCAATATCTCTTAAATGTTCTTGTTCATTAACCAACTTATCTAAAGTTTCGACCTGATTTCGAGATGTATCTAATAACCTATTAATTGTATGCTCTGTAATTCCAATAAATTGACTTTGTCTTGCTGTATAACAAACAGCACGCACTCGATTAGCCATTAAATGATAAGCATTCCATGTATCAGCRTCCATTTGACCRGTACATTCTTTTATGGACATATTTTCATTGCATGGATATAATCTACGTTCCTCAATAGCTGAYTGGCAATTTAATAGCATTACAGCCATTTTAGATACCTCTTCRTCRTTCATTTCATGACACCCCTTCTTCAATCTAAGTACAATCCTCTGTT…	yes	contig04711	OtL006-A01			9.42866	-1.24668	-1.91287	4	700	Non-Horn
contig04741_a200	CGGTCATTTTAAAATTTACATCAAAGAATTTAATATTGATATCCACCATTTACATTTTCACTTTTCGCATTAACACCTTCATAATTATTACTAGCGTATCCATTAGATCCGCTATGAACATCATTAACACTCAATCTYGCCGCATCGGAAGCCGTTTTGGTTATAGCCTCGTTGATATGTTCTCCGGCTGGTTGAAATCMATTTTCATCGGCGATGTACGTTACAGTATACGTTTTTCCATCATCTCCAACATAAGAATAACTTCCTTGAACAACCACAGCTTCACCATCTTGTTTGATTTGGCCGTGTTCTTCGTGGCGAATTCTATTTTCAGTTTCAAAATCAAAGTGGTAATTACCACTTCCATCATTGTTGTTGTCGAATTTGATTAAGTTAGCG…	yes	contig04741	OtL014-H10			8.75833	-0.500561	-1.42327	4	698	Non-Horn
contig04744_a201	GGSATTCTGTTACGGACAAGAACGAATAATGGGCAGAAAATGGATAATTTGACGGGGATATTCGCAGCGGAGGATCGCGGATCGTGTGAGATGCCCGTACGGGTGCCCCCGTTGGGACAATGGGCGGCTGCATAGGTGTTTCCCGCGGTCGAAGCGGGGCTATCGAGGACTCCGGGTCTAATTCCAGGCCATACACAGGWAGTACTCGAAAAAATCATCCTTTATGTCACGAAACAATTCGTTGGAAATCCGATGTGCCATTAACGGAAGGTCAACTTCGTAGTAAACGAGACGAATTTTGGGATACAGCACCGGCRTTTGACGGTCGCAAAGAAATTTGGGATGCACTTAGAGCCGCAGCGGTAGCTGCCGAATCAAAAGATTACGAATTAGCCCAAG…	yes	contig04744	OtP011-F07			9.25329	-2.41573	-2.0485	2	731	Non-Horn
contig04803_a202	TGTAGAACCTCATAGATTTTCATGTTGAAATTTAATATTAAAGAAATTTGTTTTGTTAACAATAACGATAGCCAAAATTATAGTCTGCATTATTACTCTTTGTTTTTTGCTAAGAATTTATTGAATCGCAAAGTAGTATTGCTAATATTTGTTAAAATTAAGGTGTACACTTTTTCAGACTGGCAGTGTCACCATTTTGTAATATGTTTCTACATAGGATTTCAATTTTATTATTTATTTTTKAGTCATTYTGTAAGGGTGTGTCCAAACATRGAGCGGCATTCAAACGTGRCATACGGCACTACCTGGCGCTCGCGAACATTTTTAGTAAGTGCGTGGCGTGTCTATGCCGCGCAAACATTCTTTGGTATATTCAAATTTGTGCACTGCAGAATTAAT…	yes	contig04803	OtL020-H12			9.17294	-1.86082	-2.06143	3	1075	Non-Horn
contig04815_a203	TTTGAACGTTTGTTTCAGATTGTAATTTTGTTTTTGAAAATTTAATTTTTTAATTCTTTATTAATACATAAAATTATCTTAAATTAATTATCCAGAACAMCCACGGCATCCGCAATGAACGCATTCAACAATCCTTCCCTCCTCCAATTTTCCTTTAGGTACTCTACAAATACAATTAGTCCCAAAATTTGTATCTCGCGTTTGAATACATCTTAAGCAACATAAATTTTCATAACCYGGCTTTTTCCACTTCGCAATCAAATTTTTATCGGCGATATTTTCGTTTAAACAATAATCGTACAACTCCCTACTAATYGCTTTTCTTCGATAAAATAAATCGTAAATGTACCTCGATTTTTGATGGTGTATCTTAAATATGGGCCAAAGCGACTCTTGTTT…	yes	contig04815	OtL016-B03			9.97688	-1.94051	-1.66073	3	617	Non-Horn
contig04817_a204	AAGATTAATTCTTTTATTTACACGAAAAAAAAATAACTTTTAAAACCAACTAACAACATCATGAATCTTCTAGTTCTTCCTTGATTTCCCAATTTTTTTAATGTCTTTTTTTTTTCTAAATAAATTTAAATAGACGGTCTTTGTAGGCGATTTCGCCCCTTCGATATCGAGCTTCATTTTCCGTTCTCGATTTATACATGAAATAAGAATAAATCGAAAATGGAATTCCGGCGAGGGCGAGGAACATTATTGAATTCTTGAAATTCGGTTTGAAGTGTTCGTAAGTGGTTACTTTCATAGAAACGAATCGTTGAACTGCTGGATCGAAGACGGTGCCCCCTTCGTTCAATGCATGCCTATACGGGTTGGCGGATTGTTTAAGRAACTCATTACGRAGGA…	yes	contig04817	OtL014-H06			9.36417	-2.89833	-2.76649	3	486	Non-Horn
contig04866_a205	GGATTTCATAACTGTCAAAAAACAGCTGTTTATTTGTTAACCTTAAAAATTTATAAATCATTGAATAAAATGATAGAAGTGACTGCGAAATTAATTCGGGGTCCTGTTTATTTGTTGGGTGAGATTGTTGAGTGTGGAATATCGTTTACGCATCCTCCTTCGCCGCAACATCGCGTTTCGCAAAGCAATAACGACGCTTTCGAAAGTTTAGCTTGGGCCTCCGCCCAAATTCATTGTCARTGTACGACCGATTCGARATTGAACARGACCAAAACGGAGAAAAAGGATGAAAGTAATYGTTTRATAAATAATACTACCTTGTCCGTGGGGAATCACGATTCYGGAAGAACCGAGGTGGCCACTAAACCGAGRATTTTGTTTTGCGATTTAAGATTGTCC…	yes	contig04866	OtL008-A08			8.37327	-2.3064	-2.26843	1	1193	Non-Horn
contig04917_a206	GGRGAAGTCGATTTGGTTTCGATATAACAACACTTACAAAAAAATAACAYAGCACAATGAAACTTTTCGTTTTTGCTGCCATCTTAGCTTATGCTAGAGCAGGAGTTATTAGCTCCTACGCAGCCGCCCCCGTAGCTTACCCAGCTGTACATAGCTATGCCGCACCAGCAGTTCATAGCTATGTTGCCCCAGCTGTTCATAGCTACGCTGCTCCAACAATCGCTAAAGTAGCTACATATGCTGCCCCAGCTCCAATTACCTACGCCGCAAAATCATTCGCTCCCGTTGCTTACACCGCCCCAGTTGTTAAAACCGTAGCCCCAGCTGTAGCTGTTGCAAAAACCGTCGTCCAAGAAGAATACGACCCMAACCCTCAATACTCCTTTGGATAYGACGTCC…	yes	contig04917	OtL002-C07			10.8606	-0.0394763	-0.582337	4	603	Horn
contig05048_a207	GGACCGTACGTCACGCACATCTGTTATGTTTKGACAGTTCGTGGTTCGGATGTGTTTTTAAAAACGACYATGAGATCGAAATAAGCTCCTCGTAAAAAAATCGCCGTTTCGTAACTTTCGTGTAATATGCGAGAGAAAATGCCACCGTTTAGGAAGAAAAAATCGTCAAAGAGCTTCCCCGTTAAGGTTTGTTCGCTCGACGCCGAATTGGAGTTCAATTTGGAGTGGAAAGCGACAGGAAGGGAATTATTCGATTTAGTATGTCGCACAATCGGGTTACGAGAAACGTGGTACTTCGGGTTACAATACGAAGAYTCGAAAGGTTTAATATCTTGGTTAAAGCTCGACAAAAAAGTCCAATACCAAAGCATACAAAAGGACGATCAAAAAACCGCCTCG…	yes	contig05048	OtP013-B01			8.7909	-1.81701	-1.93858	4	808	Non-Horn
contig05080_a208	GTTCAATCAGGCCATATTTTGTTTCAACAAAACCATTATCATCAACCAATCCGGTCAGATTTTCAACCAAACCACTTTCAGGAATGACTTGTCCCGTTTTTGGATCTTTTTTAACCGTAATAACCATAACTTTAACAATATTTTGTTTAGGTACCAATCCAATTTTCTTCGGAGATGTTTTAACACTGTCTGGTTTAATTGGCGTCGGTTTCGAAACGTCAGCTTTAACCGGAGTTTTARCAATTTCCGTTTTCGTCACTGTTTCGACTTGTTTAACAGGAGAAGGAGCCACTTTAGGTGTTTGTTGTTTAACTGGACTTTCAGTAACAAGCACTTTTGGTGGAGCAACTTCCTTAATGACAGGAGTTGTTTTTGGTGCCAATATATTGTTTTTCAMMT…	yes	contig05080	OtL009-C07			10.7811	-2.14161	-2.05938	4	569	Non-Horn
contig05103_a209	TATTAAATTATGTTTAATACTAATCTCAAAGTATCTTTTAATACTTACTAAATATTTATCATATACCAGACCTAATACCGTTTAAATAACTTGAGAATAAAAAAAAATTAAAAATGTGGTAAACAAACTTTACCAGCGAATAATTCCGAAATAACCGTTATCCATAAAGCTAAAACAAATAAAATGTAAGAAATACCAACTTGATGACTATTTGGTAATTGATAAGGTTGCCCGCCAATTTCATGTACATGGAAACCCATTGGAAATATTACAGCAGCGAGACAAAATAAAACCATGGCTGTAAATCCAACCCATCTTGCATAAGGTACAACGTTTCTATCCCAGTGTGAAGAAGCAAGTAATATAATTGTGGTTGTAATACAAATGCACCCAACGAAT…	yes	contig05103	OtL005-A08			9.63	-2.48151	-1.93351	2	676	Non-Horn
contig05150_a210	GAGTATTAATAATTCATCATTTGAAGTGTACGTTTACGAAAATGTCGCAGTTATTAACGAATTACTTATTAATTTTCGTTGTGGTATGTGTGCAAGGAATCTTTGTTTCTTGTGGAAATGCCGATGTATAYTGGAGGGATTATAGAGGAACAATYCCAAGAGACRCASATTTCCWACCGATCATGGAACTTACATTGCCCAAGTAATTATTGAAAATGGTGGAATTGTTCCGGGAACTTTATACCCRGATAGGAAAGTTGYTGTGTCTGAAGCACCAAGCGGAAGAGTTGAATTTTTAAACAATATTAAAATATTATGTTCCCCACAACCTAGTGCTTTAAAATGGGAATACGTAAACACGRATCAAYTAGATGCGAAGTTCTTGGAGAAATGCATCGT…	yes	contig05150	OtL009-E04			11.7294	-2.12555	-1.40772	3	644	Non-Horn
contig05163_a211	CATCTCCACCTTTACCAGCCCCGGGAAAGAATGCATGCGCTAATACTTGTCCTCGACCATCAAAAGTGAAGTTATCACCATGGTCCCCACTGAAAAATGACACAACGATATCGGCTTTATCATGGTGTACCTCTGTAAACGTTAATTTCGAGTGTTTCGCCCATAAATCTAAAGCTTTCGCTAACACCTGTCTCGCTTCCTCCCATTGTATATTCGATGGGATTCCGCTTCGAACCAAAGTCCATGTTAAATCGAGGTGATCCCACGGCCTGCCGTGATGCAACGCGTACCTCCGCGGTCGCCCGTTAGATGGCTCTCGATCGGGAAGCGCGCATCGTCGCACTTTCATCAATTTCCTCGTTCTATCGTCCAGTTCTCCCGTAACGGGAATGTTTGCGA…	yes	contig05163	OtP007-H10			11.1899	-0.95287	-1.33346	3	941	Non-Horn
contig05193_a212	CAAAAGTAAATAATTTATTTTATCACAGACATTTAAAAATCTAACGAACCACTTAATCTAAACTTTGGTTTGTCTTTGTTTGGYCCATCCAGAACTTTCTCCCATACAGCAGTAATATCGTACCGTTCGGATTTCGAGTTAATCGTTAATGTTCCAATAGTATCATCGCCGTCTTTTTCAATAACAAATTCACCTTGGTTATCATTTCTTTTATTTCTCAATAAAGGATAAGGTTYGCTGCTTATATATTCTTGCGATTGTGGTTCACAATATACAACAGCAACGATTAAACAAATAAAAATAAYGAGCGATTTCATTTTAAATGGATATCCTAAGTAGGATAAATATAGAAGTGTTTTCAACTTAAACTTCACGATAACACTGAAATTATATACGACG…	yes	contig05193	contig_340			10.7296	-2.0095	-1.39697	4	539	Non-Horn
contig05198_c919	GAGTKGACGTTTCAATTTATAACCACACCTTCGTTGTTTACACCCAAAACCTGAATCATCGTTTTAATAACTTCTTAATAACTTTAATTTTTTTATTTTATAAAGATTTAATCAAAAATGAGTTACGGAATGAAATCGCCAAGCCACGGAACTCCGAGCGTTTATTCGCACGTCACCACAAGAAGTAGCGCAAATTTACGAAGCAGTCGCAGCATAAAATCGCTAAAAGTGCCTTGGTATCATAAACCGATCATAGAAAAATCGATTTTCTTAGATGTGCAACGTAGCTGTATGGTTACAGCGGTTTTTTCGCTGCTTTTATCGATTTTTACGATCGTTACTGGGATATTCGATATTTATTGTTATGCGATGGCAGCCCCTGGATCAACACATTATGGT…	yes	contig05198	OtP006-A05	OtP018-C12	OtP017-D12	10.2753	-1.94379	-2.22161	0.666667	1020	Non-Horn
contig05234_a213	CAACCAAAACAAACCTTACAATGATACATTAAAAAAACCTTATATWTTATGCATGTTCTTAAATACTTATTATTAATCACCTGTCATCATCGCCATGAATTCATCAAAATCGACGGTTCCTGAGGAATCCGCATCGATTTCCGCAATCATTTCGTTCAATTGATCGCCGGTTAACTGGTCGTCTAATGCGGCTAAAATTTCTCTTAAGCTAGATGTGGGGATATAACCGTTTCCTTCTTTGTCGTAAAGCCTAAAGGCTTCTTTTAGTTCTTTTTGGAGAGCCTCGTCGTCTTCGCTTTCCAGAAAATGGCTCGCAACGCGGCAGAAAGAGTCGAAATTTAAAACACCAGAACCTTGGCGATCTTCGTTCTCCAACAACGCCTCCAATTCCTGATCGTT…	yes	contig05234	OtL007-E02			10.6645	-0.451493	-1.83767	4	587	Non-Horn
contig05282_a215	AAAAGGAACGATGACGATAGGGAACTTATAGTGGAGGCAGGCAGCTGCACGTGTGCTTATAGAAGCACAGGTGGCCTACACTGTGGGAACGCCGCGCCAACTGCGATTCCCACGATCCAACCAACGGACCCAACTCCTATATAAGCCCAATCCCTCCCACCGTTTAAACSACATTTCGTTTTGAACTAGCACACTGTTCAGATCGAGAGAGTTTCTTTCAAACGAGTAGTGAATTCGAGTGATTACTATTATTTTATTTTATTTACTTGGATTGTTATTTTCAAATAAAAATGGCAACGACATCTTACGAAATTTTATCCGCCGAAGAACCACAACCAATCTCAAGAACCTATCAATACAGAAAAGTAATGAAACCGAAKGTTGGAACGTAAACGACGT…	yes	contig05282	OtL020-B06			11.5135	-1.33853	-1.33713	4	1212	Non-Horn
contig05319_a216	GACGGAAGCGTAACCGTTTTGATCTGAATTCCCTTTGGAACAATCCGGTTTCGTGTTTGAACTGTAATTGACTGAGTTCTGTTGGGATTCGGTTGATGATGAATATAATTTGCAGGCGGAGGTTATTGAGGCGTCGTAAGGTGAGTCCTGGGGCGGCCTGGCCTGGTGCAGCGAGTGATGATGGTGGTGTTGACTCGAGGCATAAGGTGACATGCCGAGCGCGATCGGAAACGGTCTGTACGCGCTATTTTGATCGTGGTGGTGACTTCCGGTCACCGAGCCACTTTGATGAGGGTGTCCGTAAAAGGTGTTTGGCTCAAAATATGAGTTCATCATGGGGTTTTAACAAGTAAAAAAACACTTAACTAAAAAAATATGTTTAAACACAAACTTTTTTAA…	yes	contig05319	OtP011-F05			8.08743	-1.46916	-1.5715	4	715	Non-Horn
contig05411_a217	CGGCCAGGGATATTTGTTGTTSCCAGTCTTGTTGYAAGACGGTCACTAATAAAAATGTTACGRTATTTATCTACSTTATTTTATTTGTTTYAATTATTGTTTTTAACCAAGGTGTATTTGTTACATGTGTGGACGCTGATATTTATTGGAGAGATTATGGAAGGACAATCCCCTCGGATGCGTTTCCTTCMGGACATGGCACATATATTGCCATCGTTATTTTTAACGGAGGACTTATTCCAGCAACATTATACCCGCATTTGTATATGGCTGTGTCTGAAGGGCCAAATGGAAGAGTGGAGTTTAGGGACAATATTAAAATTTTGTGTACATCAAGACCAGAATCATTAACATGGGAACCGGTGAGCGTAGATCAATTGAATTTAACGTTCTTAAAAA…	yes	contig05411	OtL014-B07			8.17143	-1.93572	-1.77311	3	657	Non-Horn
contig05415_a218	TCATTAGGTGCCTTGGATTTGACGCCAAAAACATCTCAGGCACCTATTTCAAGTCCAGGGCCGAATCCAGCACCTCCATCGCTGTTCTCTTCGTTCGGATTACTTCCACCAGGCCAAACGAGTTCCCCTCTGATGACGTCAGCGTTATCATCACTAACTTCCTCGGTGTTAACGTCAACTACGTTCAGTCCTTTGAGGTTAGCTGTTGGTCCAACGGTGAGGGGGAATACGACTTGCACGCTGTGTTTCAAGACGTTCGCATGCAACTCGGCGTTGGAGATCCACTACAGGAGCCACACGAAGGAGCGTCCTTTCAAGTGCACGGTCTGCGATAGAGCCTSSTWMTCKWYGMAGACCGGCGAGGACTGTCTGTGCGGACAGAGGCGTATCCAGGCCACA…	yes	contig05415	OtL005-C09			8.79562	-2.00028	-1.04171	4	1001	Non-Horn
contig05431_a219	CCCGCGTTAGCCCCCTCCAAAATGATGAGTTGTTTAATCTCACACATCGTATCACCTTCTGAGTTCTACATAAATTATTTTAGCGAAGACATTGAAGCGATTGAAAGGATCTCATCCGATTATTCCTCAAACCACGATAGCCCCGAATTCTATTTTTTAACCAAATCTGAGGCGAAATCGAATTTAAAAACGTATTGTTTGTGTTATATTGATTCTTGGCAGTTTTGGTTCAGGGCCAAAATTATCAATTGGTTGGATGATGATTCTGATGATGATGATGTTGAAGTGTTTTTAGTCGATTATGGAATACTGTGAGGGTGACGTTCAAAAATTTGCGACCTTTATTAAAGAAATATGGAGATATTCCTGAATATGCGATAAAATGYCATTTGGCTCATT…	yes	contig05431	OtP011-H05			11.5405	-2.34285	-1.76934	4	1343	Non-Horn
contig05443_a220	GGTCAACGTSAGAATAAAAATTGATAACGATTTTAACCTCAACGATTTCATTTAATAAAATGAGTCAAATCGAACAAAACGGTGAAGAATCTCAATTAACAATGGGGCAACCGCTCAGCGATTTCCTATTACAACTGGAAGATTATAATCCGACGATTCCGGACGGTGTAACGGCCCATTATTTGCGTTCGTCCGGATTGGAACCGAAAGATCCGCGTTTGCTACGCCTAATTTCAATCGCAGCTCAAAAATTCATTTCGGATATTGCAAATGATGCTTTGCAACATTGTAAAATGCGCACCAGTAATTCATCGTCCAGTAGCAGTTCGGGGAATAATTCGAAAAATGCGAAAGGTACTAAAGATAGAAGGTATTGCTTGACGATGGAAGATTTAACAC…	yes	contig05443	OtL003-H11			9.34922	-2.19535	-2.31343	3	697	Non-Horn
contig05451_a221	GGGACTTCCGGTAGAACTGGAAATCCTACAGATATTAAAAAACGATACTTGGATGAAAGATTCCAAAAATGTAAGTAAGTCAAAATTAGAAACTTTTGAGTTGTTTTTTAACTTGTTGTTCGGTTTATCTTATATATCGATAAATACAAATTGTTAACGTAAAAATTAACTCATTTAATATCTKGTGTAACAAAAAGTGAGGTTATGTATTTACGTCAACTCATTGTCACTTCAAACTTATCTATTTGAAGTATTTCAAAAACTCAAYTTTTTCGATAAGATTATTTAAGAGTACGTGTATTTGAATAGTTTTAAACAATTACCTACAATGAAGCATTTACTTGCATTAGTTTTTCTATTAATTATCACTCAAGGAATTTGGGGAAGGTCGAAATCAAT…	yes	contig05451	contig_108			9.70068	-3.63715	-2.65164	3	816	Non-Horn
contig05550_a222	GGCTTCTTAAAGCGATTTATACAAAATTACAGCATAAAAGCACTACAAGTGTCGCTTATCAGAAAGATTTGAATGTTAAGAAGTTTAAATTTGTTAAGAAAAATGAGTTTTTCGAGTATTCCCGATGTTTCGATCGACCCCGAAGGTGTTTTTAAGTATATTCTTATTAAATTAACAGTTCAGAAATCTGATGGGAACTCTGAGACGAAGGAAATCGTTAGAGGTTACGCGGAATGCCCTTATCATTCTGATATTAATGATAAGGTCACCGATCAACTTCAAAAATTAAAAGTCGACGGCTCCATAAAAGAATGGAAAAGCAAAGTTTTGTGGGTGGTGGAAGGATCGACCATAACGCGGCCGGTAAAAGCATCAAAGTTTACGGATATTCCCAGGGTT…	yes	contig05550	OtL010-E07			10.0561	-2.361	-2.32632	1	560	Non-Horn
contig05711_a224	GGGAAGCGGTTSATGTGCACATCAAGCAAGCGTCGGAAGCGGTTGTAGTGTGTTTATTTTTYYTTWAACAACCTTCCGATCTGACCCTACACCTCCCCGAGCCCAAGGAGATCCCTACAGTCAACATTGTATAGGTTATGGATTTGGATGATAAACCCATGATGAACGACGATCCGAATATTACCCTCACCATCAGGCTTATCATGCAAGGAAAGGAAGTAGGAAGTATAATTGGTAAAAAAGGAGAGATTGTAAAACGTTTTCGTGAAGAATCAGGTGCCAAAATTAACATATCGGACGGATCATGTCCAGAACGTATTGTAACAGTAACCGGATCAACCAGCGCTATATTTAAAGCTTTTACCTTGATCTGCAAGAAGTTTGAAGAGTGGTGTTCCC…	yes	contig05711	OtP006-E09			11.1917	-1.47207	-2.07112	3	1169	Non-Horn
contig05817_a225	ATTACTACTTTTATTTAATTCTTTACAAATTCTTTTTCATTAAATAATATTTAATAGCATTAACATGATCCCCATGAAAGCAAATGTACCCAACCAATTCATTTACTTGACTTCGAATTGGATTTTTATTCTCTTTTTGTAAAAATTCCCTCAATTCATTTTCCAACCTCCAAATATCCCSTTGAATTTTTTTCACATAAGTTAATCTCTTCATACCTCTATTACTGGTTTTCATATAAACCGGAATCATATGATTCTTAGTTCTTTGAATAAAATAAGGCAAATTTGTGRCATCTAAACTTTGAGGTTTCCAATCGGAGGGGTATTCATTTTTTAAAGTTGGTTTTGGAACGGTTGTTGGAGGTAATAAACGTTCTACAAATTTCCAGTCATGAGGAT…	yes	contig05817	OtL015-F12			8.37901	-2.01371	-2.01134	4	572	Non-Horn
contig05847_a226	CAAGATTAAACATYGTATTTTAAAACAGAGRAATAAATGTATATGAAATTTTTTTATRATTCTACTCCAGCGAATTCTTCTTTCGGTAACCCATCCATATAACATTTAGCAAATAAATAAGCAGATTCCAAGCCATTCCCACCTTGTATATTGCTGCAAGCAGCAGAAGCTGCTTTAGAATCGCCTATTAAGTTATCACCAAAATTAATTACASCTTCTTTATTTATAGTACCATCTTGTCTTATAAAACCCAGTTTTAAATAAGAACAGAAGAGAAAATGTTTTAACACRTCATCATCCGWAAACTTTTTATTCATAAAATCAATTATCAATGYACGTTCRATGTTTRCTTCTTTCTCACATTTAATAATAACATTTTTCAATAGTGCTTGTGTTTGT…	yes	contig05847	contig_55			8.08473	-1.50059	-0.87546	2	505	Non-Horn
contig05906_b871	GTTCGCGAACATGCGGTGCAGGAGTTGCGATAATGCAAAGGGAATGTGACCATCCGAAACCAGCGGCGGGTGGAAAGTTTTGCGTTGGGGAGAGACGTCGTTACAAGATTTGCAACGCGAACTCGTGTCCTGGCGATCAGCCGACATTCAGGGCGACCCAATGTTCTAGCTTCAACAACAGGACGCACGAGGGACGGAAGTACTCCTGGGTTCCTTACTTCGATCAAGATGAGCCATGTGAATTATATTGCAGCGACATCAATGATACTGTAATTGTAAGCTGGGGAGTTGCTTTAGATGGRACGCCTTGTAATGTAGGAAGGAGAGATATTTGCATTTCTGGAATATGCAGAAAAGTTGGTTGTGATTGGACGGTAGATTCAGATGCAGAAGAAGATG…	yes	contig05906	OtP015-B06	OtP015-B07		9.97772	-1.61794	-1.87708	4	1410	Non-Horn
contig05932_a227	GAGTTGTAGTGGTGTGGATGTGGCCGTCGGGTCGTCGCGTTTAGAGCCATGCGCGATCTCGCAAGTAAAATGGCCGAGTTAAAGTTCGAGGCGCCCCTGGCCCAATTCGAAGAGACAGACGAGTGGGGCTCCACTGAGTTCCATCAAAACGGGACTACACAAAATATGAAGAAGAACGAAGCTGATGTTGACAAAGATCTCAATTTGAATAAAAAGAACGCTGCTAAAATTGGGGATGTACTCAAAGAATTTAACGGGGATATACTGTTGAATGATAACTCAAATGGGGAACTTGGGGGTGGTTTCATACAAAACGGTGTCGGAGGAAGAAAAGATGGTTCGGTTGCTGATAATTTTACAGAAACATTTTCTGGATCCTTGGAGGATTTGGTAAATACA…	yes	contig05932	OtP015-D02			9.01971	-1.4722	-1.01296	3	715	Non-Horn
contig05975_a228	ACAATTTACCATTGGGTTTGGAAGTTTACAAAGATAGATTGTTTATTACCGTGCCGAGATGGAAAAAGGTGTGGCGGCTTCTTTGGCCTACATTAAATTAACAGATCCCATGGATTCTCCAAAACTAAACCCATACCCAAATTGGTCAGCCCACAATTTCTCGACATCATCAACACCTGAAATAATCTCACCATTTCGAATACGAGCGGATCAATGCGATCGACTTTGGGTACTCGATACCGGAATTCCAACATTTTACCCGATAAGGAACAGCTCACCAACCCACCACAATTAATCATCTACGACCTTCACAGCGACGTTTTACTACGCCGATATGAAATCCCGGCCGACCAAATTAAGGAAAACGTAAGTTTCTTCGCAAACATAGCAATCGAAGAT…	yes	contig05975	OtL011-D05			10.3101	-1.80689	-2.46694	1	1055	Non-Horn
contig05978_a229	AATTCGTTAATTACAKAATTATGGAAATATCTTTTAAAGGGAAAACGGCTTTAGTTACAGGAGCTAGCCAAGGTATTGGAAGAGATATTGTAAAACAATTAGTGGCATGTGGGGCCCATGTAATCGCTATAAGTCGATCGAAAGATCTTTTGGAATCCTTAAAATCGGAAACTTCTAACGTTGAAATAAAAACCGCTGATTTATCAAATTGGGAAGAAACCGAAAATGTTCTCAAAGACATTGGACCAATTGACTTATTAATTAATAACGCAGCCGTTGCACTTTTAGCCCCAATTCTTGAAATAACCCAAGAACACATTGATAAATCTTTCGATTTAAATATTAAATCAATCATACATATAACACAAATTATTGCTAAAAATATGATTGCAAGAAACA…	yes	contig05978	OtL001-D01			10.8341	0.0984557	-1.08021	2	693	Horn
contig05981_a230	CAAATAATGTATAAGTAATATAAGAAAAGGAACTAAATACTATTTAATAGAATCTTTTTTATTATATTTTAACTTTGTTGCTAATTTTTTAATTAGTATTCATCATTGAAAATCTCTTCTAAAAGTTGCTTAGTTATTGTTCTATGTGGTCTTGTTGGATCAAGTTTCGGCCTTCCATACAACCTGCTGTTGATCACATACAACCTTGGACTTAAATCGCATCTTACATTGAACCACCAATCACAAACAAATACAGCTTGACTGAATTGCGTTCCGTTGGGACACAAAAACGTTGTTTGTCTGCCATCGATGTCGCAGTAATGCCATGTTTGGCAACGAGTGTCCGGATCGGCATAGAATCCGGGATAAGGTTGATCATCGCAATAAAAGCTGGTGTAA…	yes	contig05981	contig_144			8.24137	-2.30508	-1.93705	2	737	Non-Horn
contig06044_a231	ATATTTTGTCAGAAATTATAATCTTTTTGCTTTTAGGTATTAGTCGAGATCATTGGCACAAGCGACGTGCCACTGGTGGCAAGAGGAAGCCCCTCCGCAAGAAGAGGAAGTTTGAATTGGGTAGACCCGCCGCCAACACGAAATTGGGACCTCGTAGGGTACATTTCGTCCGTACCCGTGGGGGTAACCTCAAACATAGAGCTTTAAGGCTTGATATGGGTAACTTCGCCTGGGGTTCCGAAGGAACCGCTCGCAAAACGCGTATTATTGACGTTGTTTACAATGCCAGTAATAATGAATTGGTCCGTACCAAAACTTTGGTAAAAAATGCGATTGTTGTTATTGATGCCACTCCATTTAGGCAGTGGTATGAATCCCATTATGTTTTACCACTTGGAC…	yes	contig06044	OtL018-H09			13.3465	-2.06959	-3.3586	3	714	Non-Horn
contig06086_a232	TATCCTAACATAGCATGATGATGTGAAAACGGACCGCCGGGAAACGGAGGCCTAAAAGCCGGATTTGTATGTTCTAATCCGGGAGGGCAACACAATGATCCCAAAGGTCCAGKWAAAGCGGTTAATCCGGGTAATCCCGGTTTGTAACTCCCCAAAGGAGATTCTTTGTGTCCTKGAAGGATTTCTAATCCACTTCTTATRATCGGACTGGCTCCTCTTGCCGACGGTGTAGTACTTTTGCGGTCGGACGATGGGGTGRTCTTTCCATTTTCCGGAGCGGGAGTTGTTGTGTTACTATTAGCTGGGGAAGCCGATTTTCTATCAGATTTTGAATCCCCAGCGTCAGAATTATGAACACTTGACTTTGAAGTAGGACGGGAATCTTCCGTTTTCTTCGAC…	yes	contig06086	contig_428			11.7134	-1.88704	-1.83448	3	897	Non-Horn
contig06127_a233	AAGTGAATAAATTGTTTATTTAAAAAATTAGTGTTATAATTTCAACTTAAATACGTTTAAAGCAACACGAGAAATATAAAAGTACAAAATAATATCATAGTTTTAAACGATGCATCATCCCCGGCTATATTTARCAAACTGATTCATAATTAACTTTGATGTCTTTCTTGCAACATCTTACAGCACAATTCAACCTTCCTTTGTTACGATAATTACAGCCATCTGTCCCACAAACTGGGTTATATTGATCTATGATATGTGCAAGGCAATTTCTTATACATTCYGGAATAATTTCTTGATTGTCCAAACAATAAACATCTTGCGGAGGTGTTGGTACACAAATTGATGGTGGTTTTCCATCAGTTGTTGTTTGTTAGGAGGTGTTGTAGATGTTGTTGT…	yes	contig06127	OtL012-E10			10.5384	-0.990365	-1.19333	3	709	Non-Horn
contig06142_a234	GGGCCATTACACGACTTTTAATCCTACAGAGCGTTTGTCTAACTTGTTAAATGTGTTTAGCGTATATATAGTGACTTTAATATTAATTTTAATAAGTAATAATTATGAAGTTGAGGTTGATTACAATGTTGGTTTCTTAAATTTTGACTTASTTTCGAATTCAACGGTTCATTTCCAACGGACACAACAATAACTYTACAAGTTTGGGACTATGATCGCCAGTCATCTCACGATTTAATAGGCGAAACTCAAATTGATTTGGAAAACCGATTTTACACAAAACATAGGGCAAAATGCGGATTAGCATATGAATTCTGCGAAAAAGGWGCAACCGTTTGGAGAGATAACGAATCTCCAARTGATATTTTAAACGGTTTATGCAATCTTTACCAACTTGAA…	yes	contig06142	OtP009-A11			8.60685	-1.26278	-1.03147	4	895	Non-Horn
contig06245_a235	TAGTTCCACCAAAGTTTATTAATATTAACTAAATTCAAAAGTTACATAAAATATAAACCTTAATTGGAACAACGATTTACAACCTTCTACCACGACGACCACCCTTTCTGCGTGTAGAATCAGATGGAATGGGAGTAACATCTTCAATACGACCAATTTTCATGTTAGAACGAGCYAAAGCTCTCAATGCACTTTGGGCKCCAGGTCCGGGAGTTTTTGTTTTATTTCCACCGGTAGCCCTCAATTTAATGTGTAAAGCTGTGATTCCTAAAGCTTTGCACTTTTCAGCAACATCCTGTGCAGCTAACATAGCGRCATAAGGAGAAGCTTCATCCCTATCGGCTTTTACTTTCATTCCACCGGTAACACGTGAAATAGTTTCCCTACCAGATAAATCGG…	yes	contig06245	OtL015-A07			12.7532	-1.54368	-1.62906	3	585	Non-Horn
contig06340_a236	CAAACTTAACCTCACTTTTTATTAAAAAAAAAACATTTAATATAAAAAAATAATTTAATTATTTTCAAATTTCCACTTTATACTAGGTAAATTTTTATTATTTTCCTTGTTTAATCGGTATTCGTATTGCAATTTAGACCATATTCCTAAACACATCTTCAACAATCGTCCCTCGACAACAACCGCTTGTTTCGCGTTATCGTACTCTCGCTTTATAATTTGCCTCGCCATTTTATACTGTTGCCTTTGTATCAAACTCAAACTAAAATACAATCTACAACGCGCTGCAATCGTGGGGTCCCCCATTTTCACCGCTAAAAGTAGTTGGTTATAGGAGATTTTCCCAGCAACGAGGGCAAAATTTTCATAATAATCTCCTAAAGCGGAAAAGGCCCCACC…	yes	contig06340	OtL015-D02			8.54259	-2.15117	-1.58705	3	781	Non-Horn
contig06346_a237	NTAAAATATTTGCACTTATTTAATTTATAATTGTTTTTAAATTACTCCACAAAACGTAACGTATGTCTAAAAAATGGATTTTCAACGTCGACACTATGCGATCTTTCATCTTCATCGGATTGTATTTCAAAAATATAATTTCCAGTTCCGACGTATTTCGGTCGATTTTCCGATGGTAATGGTTGTAAATTTGGCTCAAAATGCAATCTTGGTGGATGAGTCGGTGGAATATAATCCAGGAAAGGCCTATCTGTAGCCGGTAAATAAAGTCGATTTAATTTCGGAGGTTGAACTTCCACTTCAGGTTTAGGATAATTATAAGCMCCTTGATTTATACACTTGATTTGATTCTCCGTATGGCGCCAAATAAGCTAAAATTGTCGCTATCRTACGAATTTC…	yes	contig06346	OtL014-A04			8.27728	-1.88839	-1.28418	4	520	Non-Horn
contig06429_a238	GMYTACAATTTATACTTTTACTATAATATATAGATCAACAACACAAGTATTTAATAAATAAAAAAAAACTCAATTGAGTGCCATAAAAAAGTTTTCTTGTAGCTTYAAGAAGTTGTAATAACCAAAGTGTATTGTTACACTCAATAAATATTTTGAAAAAAGTACATAAAAAAGATTTAAATTAAATTCTGTTGATTATCCCCAAGCTGGTGTTTTACAATAATGTAAAACTAATTTACCATCAGCACCAAAACATTCATATAAATTYCTCACTATTTGRTCTCTRGAAGGTGCAAAGTTTTGATTTACATACAAGAACAATCTATCTTGGGGGTCTAATTTTAAGTACTTTTTCATAAAATCAATAATCCATCCAATTGGTTTATCAGCTTCTACAGA…	yes	contig06429	contig_54			8.54902	-2.02952	-1.9458	4	625	Non-Horn
contig06449_a239	TACAATTGCAAGGACACCAGCCCTTTAAGCAATTACATAATGCATCCTTTTTGGAACAAAGTCATTCTGATTTGTCCAAAATGGATTGCCCCGAATCTACTTACTTTCCTAGGATTTCTGTTCACTGTTGCCACATTTCTACTCCTTTCATACTATGATTACGAATTTTATGCCTCAGCTATGCAATCTGTTGTCGCCCCAATACCTCAATGGGTGTTTATACTTTCAGCAATCAACATTTTTATTGCCTACACTTTAGATGGTATTGATGGTAAACAAGCACGAAGAACCGGAACGAGCGGCCCTATTGGAGAATTATTCGATCACGGTTTAGATTCTTTTACCGCTTCATTAATTCCGATTATAATGTATCACGTTTTTGGGAGACACGAATCTACC…	yes	contig06449	OtL016-D08			10.856	-1.85876	-1.54338	1	1298	Non-Horn
contig06525_a240	GATTCTTCATAAAATTTGAGGTTAGAATCCCGGATAAACAAAACATAGAAAAGTATCGTAGAAAATTTGTACTTTTTACACCAACAACTGCTTAAAACGTTCTTAATTTGAAGAAAGCGAGTTATTTTGACCGATTTGGACAATTTTTAGTGCACGATTGGGTTGATATGCAAAAGAAGGGACGCAAAGGTATTATCGTACGAAGGAAAAGAAGGTCGTTAAAACCGACCACTATAAGAGCCTCGGTTAAAGAGGTATCGGAAACGGAACGGGAATTGAAAATGTTGCAAATACGCGAAAACAGATTACGATGCTTGGAGATGTTGTTGAAATTAGAGTACCTTTGGCAGAAGCAGTTATTGTTACGTGAACTTCTTAATGCACCGTGGAGTCGGGAAT…	yes	contig06525	OtL019-B02			8.86625	-2.17209	-2.81654	3	728	Non-Horn
contig06655_a241	ATCGCTATAAATAACTTTATTTGTAACAATTTAATCGATTTTTACACTATTTACAACTTTGTAGGTAAGAAATTTCAACGTAACGGATGTTTTTCATTCCTTGACCAAGTATTTCGATTACTCATTGGAGGCGCACTTGGTTGAACAACGTTTAAAGTCCTATGCACSTGCCTTTCAAGYAAAGCTTCCTTGTTTAATTTCCTAATATATAAAAACGACGTTATTCCAATCACTAATAACAAGGCAATGAGAACTATCAAAATTATATTTGCCACCATTCGTTCTACTAAAAACGCCACACATAATCCCGTTATAACTATGATGATTATTAGAACGATTGCAATGATGAAAACAGTCAGGCTTTTCTTGCCACCATCTGATCCAGAGTAATAATAATAC…	yes	contig06655	OtL006-C04			8.85468	-2.04386	-2.19929	1	657	Non-Horn
contig06707_a242	ACATGCCAGCTGCAATGCTTTCTGAAGGTACCGTATCGACGGCCCCATTCGACCCACGGTTCCCAAATACAAACCAAACGAGGTATTGCTATCAAAGTTACTTGGATTTTCATCGTTGCCAGAAAGTCAAGGGTCAGGGTTACGCGCCGTGCAACTATTTCAAGAAAATGTATGAAGCCGYTCTGTCCTAATGCTTGGGTGGAAAAATGGGATGACCAAATTGATGGAGGAAATTTCTCTGGACACATCTAAGCTGGGTCTCAAACCACCCTCTTACCATTCGTCAGTCAACTCTAGTTAACTGTAGCTACAATTTTTATGTGTTCTAATTTATGAACATTTAATTAAATAAACTTATGTAAATACGGTTACTTTTAATTTTAATAAATAAATTTATCG…	yes	contig06707	OtL003-E03			10.3131	-2.21139	-2.42985	1	403	Non-Horn
contig06709_a243	CAAATTTGGACATTCGTTAGGAACCACGGCTTCGACCTCTCCTCTTTTTTATTTTTATAACTGTATTCTTTATTTTTTCTTCGCCACATTTCACTGAGCAGTGAAGATGGTTGACAAGGAGGATCTCCGAAAACGTCTTACGCCCCTTCAATATCATGTAACTCAAGAAAAAGGAACAGAAAGACCATTTTTCAGGTTGTTACGATAAGACTTTTGAAACAGGAACCTATGTTTGTATTTGCTGYGAACAACCATTATTTAGTTCTGATACTAAATATGATAGTGGATGTGGTTGGCCTGCTTTTAATGATGTTTTGGATCAGGGAAAAGTTAAATTGTTGCCAGATACAAGTGGAGGTCGAATCAGAACGGAGGTGATCTGCTCGAAATGCAACGCTC…	yes	contig06709	contig_109			9.23552	-2.51783	-2.01706	1	666	Non-Horn
contig06803_a244	TTGCTTKSRMCRSKSAGTCTTTCTCGTTCGAGCGAAGCTTCAAGCAAACTTGTTATATTACAAACAAATAAAATGGGTAAAGTACAACTATTATTGGTATTTTCCATTGTATTCTTAGTAACATACGTTTACGCCCAAGGAAAAAGTTGTCCTTTGGCCAGCAAGGTCACTTCGTGCAGTCCAAAATGSAAARAACRATACCGAGTGTTTCGGTAAAAGATGTTGCAATAACATTTGTAACACAAAATCGTGCGTTGCCGAAAATATAAGAGGCGGAGATGATGATTATAAAGGTTCAAAGAACACTGCAACTGGGTCTTATTGTGGAAACGTAAAATGTAGCGCGTTTGAAAAGTGTCAAATAGATCGCACCACAAATCGTCAAAAATGTGTTCGATC…	yes	contig06803	OtL005-E08			11.145	-1.71873	-1.70978	3	456	Non-Horn
contig07036_a245	CATAAATTGTATAGATTCGATCCAAAAGTTAGAGAAGAAAGAATTGCAGAACTGTGTGCCTTCTTTCGGTGCTTTTTTCTTTTGCCTTATTGTTCAMGAGGTCATGCCCCYTTATTGTTAAGTTTAGGAGGATGGTGTTTGGCTACGTATTCTTGTTTAGTTCTTCCCGTAGTGGTATCRGCAAACTATATTTATCCAGCAAAGTGGTTGAAGAAACTTGCGGAAAATATTCCTCGTTTGGCTCGTAAAATTGCTGTACCAATATGGACCATTTTCAGAAAAATCTACGCTCCATTAGATCGTTGCGAAAAATTCTTCATGCAAATGTCCCATTTATCCAACATGCTTAATCAGTTGGTTTTTTTTCATGGTTTGCGATCGAGTACTCCTTTRTACACT…	yes	contig07036	OtL006-H08			9.28939	-0.77304	-0.82306	3	948	Non-Horn
contig07065_a246	GGCCGATGAGGCGGCGTCCGAAGGGGGCCAGGCGCAAGTCTGGCGACAACCACGTTCAGTTTCCGCGATCGAGCCAACCGACAATACCTCCGCCGGTAAAAAACGGTTAACGGCGCCAGGAAACCGAAAACAACACGAATCTTTGACGTTTTTATTAAAACAGCGAGGCGATATTTGGCCCCCTTTTTTTGATTACGATTGCGTTCCTAATTTTTTTTTAGTGCGTGCGTGTACCCGGAGTGAAAAAAATATGGGCACGGTCGACGATTGGAGAGGTTACGCAACGATTTGTCGTCTGTGCTTACAACGAGATGGTTTTATGCTCGGAATTTTCAATCATATACAAGGAAAAGAAAAGAGTATTTATAAAAAAATTATGGATTGTACAGCTTTAGAGAT…	yes	contig07065	OtP014-B11			8.41741	-2.67171	-2.20042	2	991	Non-Horn
contig07067_a247	GGATATTTCCGTGTGACGGCGCGTGTTTACTAGTAAAATAATAAAACCACTAATTTTATTTTTCAAATAATTTTAACAATCTCTTCGTATTAATTATAATAATAATAAATCTTTTAAAACACCCCAATGGATGACGAAGCGGAAACTTACAAATTATGGCGCATTCGTAAAACAGTAATGCAATTATGCCACGATCGGGGTTATTTGGTGACCCAAGAAGAATTGGACCAAACTCTGGAACAGTTTAAAGAACAATTCGGTGATAAGCCAAGTGAAAAGAAACCGTCGCGAACGGATTTAACCGTATTGGTGGCGCATAATGATGATCCTACRGACCAGATGTTTGTTTTCTTTCCTGATGATCCAAAGATTGGTATAAAAATTATAAAAATGTATTGT…	yes	contig07067	OtL012-H02			8.81909	-1.9757	-2.5165	3	1110	Non-Horn
contig07249_a248	ATTTTGCAAAATGACTTCGGAACCTGCCGATATTCAACTAAAAACAAAACGACCTTCAGATAGTGCTTTTAAACAACAGAGACTACCAGCTTGGCAGCCGATTTTAACTGCTGGTACCGTTTTGTCCAACGTTTTTTGTAATTGGCATTGCGTTTATTCCAGTTGGAATTGCTTTATTATATTTTTCTGATGATGTGAAAGAAAAAATTATTGATTACACGCTTTGTAATAAAACTACACTTTATTCTGATGGAACTTTTGATGRAAMCAATGAAAAATGTTCTGATATAATTAGTAAAAATCGTTCGATGGATTGTACCTGTGTTATTCGTTTTAATTTAGACGTCGATTTTCTGGGTAAAGTGTACATGTATTATGGTTTAACGAATTATTATCAAA…	yes	contig07249	OtL009-B09			10.4252	-1.98452	-2.84103	2	1059	Non-Horn
contig07322_a249	TTGCCCCCGGTAATCGAGCCAATAATTATTGGGACAATTTTCGAAGTTATTCCCGCCAAAACCTTTTATCAACAAAAAGTAACGAAGGTCTTCAAAACGCATCATCACACCAACAACCGCTCTCAAACGATCGCCTTAACAACTCGATTGATGGCACCGCTTTCGTTTATCCTTTTTCAACTTCGAGTGGTACCACAACACAAAAACGCAACACTATTTTTCAACAAGACACCGCGGTAAGTTCGGTGGAAAATACTCCGAGAAGAAGATTAACGGAAAATGAACCGGAACAATCGATTTCAAGCGACAAATCGAACGAAAATGCGATGGTACCGGAAGTTGTTACACAATCGAATGTGGAGGAACAACAAGAAATCGAGAAACCACCCCAAATTAGAA…	yes	contig07322	OtP005-E02			9.88244	-2.33083	-3.61229	2	1242	Non-Horn
contig07328_a250	CGCGTTGATTAAAAAGAAACTGGAGGAGCAGACCGAGAATTTCCGAAAAAAGCAGGAGTCGCAACAAAGGGCTCAACAAGTCGGTGGGGCGCCCCCACCGGCTAAAAACGTGGCGTCCCCCACGCAATTGGCCTGGGGCACGCCAACGTCGGTTTTGCGAAAAATGACCGCCGATAAAGATGAGGGGAAAGATGCCAACAAAAATGACCCGAATAAAATCGTCCAACAGCAACAAGGTCGYCCGTTAACCGGAATGCGGCAAACTCAACCCGCTCCGCAACAACAATGGAACACTCAGTATCCRCAAATTAATAATAAAGGTAGAGCCATCGTAAAAAATAACGCAMATTACCAACAAGTCCAACAACATCCACAACACGATCAATACATGTTGCAACA…	yes	contig07328	contig_183			9.57	-2.1708	-1.55467	2	1213	Non-Horn
contig07337_a251	TTAATTACCGACTAATTAGAATTAAAGCATACCATAATCGACCGGTTATTTATATATCCTGCCGTTGATTGAACTCCTAGATCTGTTTTAATTAACGTTCTCTACTGTTTTCATTATTATTCGACGTGATCTATTGAGCCGACACTTTTAACTGAACTTAAACGGTTCATAATAATCGTTTATTATTAATGATTCGATTACGTTTCCGGTTTTCCAGCGTTCATTTTTCGGGTGTCATCCCCGATGGAAAAATATCATTAAAATCCGATCGAAATTTATGCGCACTCATCAATTATTATCGGAGCCGCGAATGAGATACGTGAGAACTTTGCGTAATTTAATTTGTGACGCGAAAAACCGACGGCCAGAAAAAAGAGAAAAAGAAAATTGCCGGGTTTC…	yes	contig07337	OtL017-G06			9.80765	-2.33979	-2.11756	3	1028	Non-Horn
contig07660_a252	GGCAAAGCYKKMYWGGMWAYWKGAAASATTTAAGTSCGAAWKAKAWMRTMKTGWAWAASTKMKWMMWAARMKWKKWKWTTARWTTWKYWWKAMWKTTWTMMWKWWAGTTCATTAAAGAATTGTCACAAGATTGCAGAAGGTCTCTATGGGGAAGTTTTTCTCCTCAAAAAATCACCGAAAGAAGTTTCGGTATTAAAAGTAATCCCAATCGAGGGCTCATACCTCGTTAATGGAGARCCACAAAAGAAATTTGCGGAAGTCCTATCGGAACTAACAATTCAATCCGAACTGTCATCGTTACGAGATGACGAGAAAAACCAAACGGAAACGTTTTCTCGGTTAAAGAAAATCTCTTGCGTTCGAGGCCAATRCCCACCACGTCTAATCGAACTTTGGGAA…	yes	contig07660	OtP004-H08			8.82463	-1.7505	-1.76257	3	1202	Non-Horn
contig07926_a253	CAGACGGAAGACGAGGGCAATCATGGAAACGACGACACCCGATGTTTCATACTGTCCACGTTARCTTCTCAGGGAAGGTCACGGGTCCATTGTGTCCTCTGCGAAGAGCAACTGTTAGTTTTCGATAGATACCCACTAGTCGACGGCACGTTCTTCTTAAGTCCAAGGCAACACGCCAAAAGCTGCATCGAAGTGAAAGTTGAAGCCCGAACACAATTCCTTAGCGTGGTCTGCATGGCTTGTTTGGAAGGAGCAACTGGAAGGGTGATACGCTGCAGATTTTGCAATCAACAATGGGATGGATCATCATTGGTTTTGGGTACGATGTACTCTTACGATATTTTCGCTGCTATGCCTTGTTGTACAGAAAGAATCAAGTGCAACTCTTGTTATAAACCA…	yes	contig07926	contig_381			10.1821	-2.0401	-2.00031	1	906	Non-Horn
contig08147_a254	GGGACTAGTTTGATGTCTTTGGCAGACTGTGGGTGTTTGGTTGTTGGTATAGATCCGATAAATTTACTTTCGTAGACGAAAGTACGTAAGACGTCCGTGTGAACATCAACTAAAGGTAAAAGTGCACTATAACATACAACTCGACTTCATAACATTTAAACATCGTCCTCTTGAAAAAATCSTCGTGCTCCATATGACAAGCGAATGTTTATTTACTATGCGATGCTCGCCAACGTTCCATTCATCGTATTTTAATCGTGTGTCTTATCGGATTTGATCGAAATCATCAAGAAATCACGCAGAATGACCATCTCATTGTCATTCTCAACTCATCAACCAACTCGTTTAACACCACTTTTTATCAATTGAACAAAGGACCACATCCAAACCGAAAGCAGC…	yes	contig08147	OtP010-A03			11.4117	-2.16268	-1.87194	3	915	Non-Horn
contig08906_a255	GGAATTTAAGATGGCGTCCGATAAAACATAGGGTTTGTTTGTGTTTACTTCAAGTTTATTTAAGTTTTCGTTGTTCAAGCGTTAGAAAACGTGCACATTTCGACCACGTTTGTTAAACTAATTCGCTTCTCTAAACGGAAATCTTACAAAAACTTCAATTATAACCATGAGTGGTCCTCGTATGAACATGTCCCAAATGAATGGGAATGGCCGTAACACCACCAGCAGTAGACCACAAACATCACAACGTGTCCAATCATCAGTAGAAAGACCCACCTGTGCTCAACACGAAGATCTAATCAGATACATACATGACTCCTGKAATCAAGTTTCACAAGAACTTGATAAAACTGCTGTTTATTATCGTGAACAAGAGAATCATCATTTGAGAAATTTCGA…	yes	contig08906	OtL016-C07			10.805	-2.62756	-2.24159	0	969	Non-Horn
contig08972_a256	AGTGCTGAGCTGCTTTTCTACCGGCTGCGGCAACAGTTGCGAACGCACCTCGTCCGAAATAGCGCCCAACGATTCTTACCGTCTTCTAAAATCTCTTCGTTACGAAATGTTAAATAATCGTTGAGAACATCTTAAAGATTTTTGCGGTTTTTTTCATTTTGCGATTTTATTACAATCCGATTGCTAATCAGGATTGAGTATTAGAATAAGTATTTTTTTTATTTTGATAGAGAGATTGAAAGAGGGGAATTCTCTGTATCTCTCCGGTAACACGAAGAAAACCAATCGCGACAGTGACAGTGACGCCGAGGAAGTGGCCCAAATCGGAAACAATGGACGTGTTTTGATTATCGTATTGATATGAAATTTATTGTGATTGAAATTAGATTAGTGTAAAGT…	yes	contig08972	OtL019-H06			8.58251	-1.11605	-1.58589	3	1186	Non-Horn
contig09096_a257	AATTGAATATTTTTATTTACAAATAATACTACATACGTAATATTTAATTAAATACTTATTCTCTTCCAGTAGTCCAATTTCTTGGCCTTTCCTTCATTAGAGTCCAATCCATTTGGGCAACTTGAACTCCACCATGCATACGAACGRTATTTTCAGGAACAAGYTCCCAACCTCTTTCATGTAAATCTTTTCTTACAATAGCTAAAAATGCTAAACCGGCAGCCGCAGAAAATCCAGCAACAGCACTTCTTCGCCAAGCCCCAACGAGTCCTCCAGAAACAGCTCCTCCGAGTCCCCAATTCCAAATATCATCCTTCTTTCTTTGCTGTGCCGCCAAATTTGAAGTTATAACGAAAGTCGAAGCTATTCCGACAAGTGGTAAGGTGATAAATGCATATC…	yes	contig09096	OtP010-H08			9.8551	-2.20894	-0.994419	4	653	Non-Horn
contig09179_a258	CTTAGCGGAGATTATGGTGCTTCATTATTAGGAGAATACGGAGTTCCACCAGCATATAATCCCGATCCAAGACATCCTTCTGGTCCATCCGGGGCATATTCTGAAAATCAACCCGACGTAGTCCCGGCTCCTCAAGCTCAAACATCTTCATCTACATCTAACCCACCAAATCCTTCATCCCCAGCTCCTCAAGCACCTCAACAAAGCAGCAACGACATCCATCTTCCTCCACCTCCACTACCAGGACATCATTCGCCATACAGTACCGTTAAAAGAAAAGGAGTTGCTGATGAATTTGAAGGAAATTTGGCTACAATCGGAGGAAGACCAAGATCTGTAGAAAACCTCTCGGATCTTCAAGGAGTTAGGAGGAGGAGAAGCCCGGAAGTGTTAAACTTT…	yes	contig09179	OtL019-F03			8.54782	-2.2235	-1.93278	4	1056	Non-Horn
contig09235_a259	CTCCAACAGCTAAAGTAGTGGTTAATCCCGTCAAAGTAATCGTTGAAATTTCCGTGTATTCTACCATGTATTTATCAAAACCAGGTTTAAGTAATGGCCAACTTAACCAAACCGAACCCACACATAAAACGTGTAAACCACCCGGTTTATCAATCAATTCTGCAGCTGCTTTTGGTATAACCGCCCCTAAAGATTGAGCAATCTGCCTTCCAGCATTTTCAAATAAATATTTCGCCATTGCATCATCACCTTCCGAGGCCAACGTAGAAAGCTTTTTACATAAACTCGCTATGAAAGCTTTATCAAATTTTGTGTAATAATGTTCCAAAAGATCTTCTTTTACTTTTATTTGAAAGTGATCTTTTATTAAMGCCCAAACTTTATCTATTGARYGAGGAG…	yes	contig09235	OtP001-F02			10.7012	-1.4118	-1.60362	2	994	Non-Horn
contig09310_a260	AATCATTAATTATAAAAAGAATACATAAGAATGGTGTGATGGGGCGAGTTTCAATCCATTTCTTAATTTGTGGAATAGAAGTAACATTTTCAATAACTTTATAAAGATTAACATATTTAGAATCAACTGCTTTTCCAGAAACTCGYGTTAAAGCATCGTTTACAGTTACTAGATAGAAATCTGCCCAGGTTAACTTATTGCCAACTAAATGACCACTTCCARCCATTTTTTCAAATCTATCTAAATAAAACGGTAAAGTTTCCTCCAAGAAAGTTTTTAATAACGCAGCTTTTTTCGTTTCATCTTGTTCGTAGAATATCGGACTAGATTTTAATCTTAAATCGGTTATTGYATCAACAATCGCATCAATTTCCAAATTTTCCCAATCATTTGCACCAA…	yes	contig09310	OtL009-A07			12.0211	-1.87773	-1.93722	3	696	Non-Horn
contig09326_a261	TTATGRTGACTTTTTAACGGATGTTTTCGAATATAAATCGGTTTTCTTTCAGGTATTAAAGATTGCGGTATATTTAATTCAAATTGTGAAATATCRCAATCATTTTGAGACATATCAAACATATAAGTTAAATCAATATCGTATCTTGGTAATTTATCTCTTAAATAAGAAATAACATTCACGCCTAAAACAGCTTCTCTACTCATAATAAAACTGGATAAATATCGGGGACTTTTCGATTTTTCAGCACAATGTAAAAGTAATGCCCAGGAATCGTAATCCGAATCGAGAACGAACGTGTTATAGACGCCCTCATATATGTTTTCTGAATGGGTCCAATGACTTGGAATTTTTTTGTTTGGTATCGTCCACGTTATGTTGCCCATTAATTGTTCATTT…	yes	contig09326	OtP011-F01			8.64618	-1.36439	-1.59803	3	725	Non-Horn
contig09571_a262	CGTCCGGGATTAAAACATGTAACCAAGGTCCTTTAGCAACATACGGATTTTCAGAATCAACCATCGTCCCAGTAACGGATGGCGCAACCAAAGTGATCGCAATATCATTAATAATCGATTTAAACGTAAAATGTCGCCCGTGCTTAACACGGCCTCGAATAGCAAAGGGAAGTAAATTTCCCGCTTCTAAATTAAAAATTAAATGAATCCCATCAAATTTTTTAACAAATTGAAGTTCAGTCGATTCGTTTGGGGGCGGTGTTTTGTTATCGAAATTCGAGCTTCGAATGAGRAAATTGGCTTTTTGTTGGAGATGATGATCGGTGGCGGGTTCATTATCGGTTTCAAAGAGTTTTTTGGATTTTGTGAAGTCTTGGTCGCTCCAGGAACATCGGGCGC…	yes	contig09571	OtL003-F01			8.98721	-1.5744	-2.42545	0	763	Non-Horn
contig09603_a263	TAATAAATAAATTGTTTAAAATATAACCACCAGAATCGTCATGTAAAAAAATATTATAAATCGAAATTAAACATTTTATAATGAATTTTTCGCCTAAACTCAACAATTTTTTTAAATCCACAAGGATTTGTTCACATAAAAAAAATGATCTATAAATTGGGTAAATTAATGATYGCCGGAATGCGGAAACTAACGCATCTTTTGGAGTTAAAGAACTATCGAACCAACTTAATGAACAACTAACATTAATTATTGTCCAATGAGATTCGCAGGTTTTTTCAAAACCTGTCGTTCGGGCATCATAACAATAAGCAAATAAGATATCTATTAAACTATTTCTACAATAAACAATTTGTTGATCACTTAAATTAAATTCTATGTTTAACAAATCTTTCATAA…	yes	contig09603	OtL010-C01			10.3406	-1.70246	-2.97332	3	847	Non-Horn
contig09700_a264	ATTTGGCTCCGTGAGCGGTTATTCGAAGTTTAGTAGGAAACAATGGTCCTGATAAATATCCACTATCAATGCATTGAAATAAAGCTCCAGATGCGGGAAAAACGATTTTCCCAGATTTCTCATGAATTYCATACGAATTTATCCCCCACGTAGCTAACCTACGCCTTTCAAATTGTAATTGTTCCTCTCTACTACATTTATTAGCACTCGGAAAATTTGATTCCAACACAGAATGCCAAATTAATTTAGCTGGGGAGTTTTGACCAGGCGAAACATCGGCGTATAGTAATGTGGYTTCCCAACCGTTTTGGGGGGTACTCAGAAAATAGATTCTTGTTCGTCCGTCTGGTAATGGTCTGAACGATATGTAAGAAGGAATCATCGTGGATAAACCTGAAA…	yes	contig09700	OtP003-D04			9.40796	-1.53082	-2.28152	0	709	Non-Horn
contig09911_a265	TGTGTGTTTGCTCACACAACATGCACTTCTATCAACTCTCTAATCGGCCGGCTAATTTTCAAAATTTATTTTCCGCGCCTTTCTGCCGTGTACTGAGTGATGAGATTCGTGTACAGGCCGTCGCAGTTGGAGTTTTGCTTGGCGAAGAATCGGTGCTTCGGCAGGTTGTTGTTGTTGCAGAAGTTCATGAAGATGCCGTGAGTGAGCGATCGGCACGCGGGGCAGTCGCCGTTGAAGCAGTACATGAAGCACTTCATGTACATGCACCGGATGACTCCGCCGAAGGTGACTCCGGGCGAGTTGGCACACGTGYCGAGACAACGCTCAAAGCCCGGACACTGACCGCTCGGCTGTCCCTTGCCCATAGCCATGAGCACYTTCCTCGCGTACGAGCACTCG…	yes	contig09911	OtL019-D03			8.74581	-2.09321	-1.28108	2	684	Non-Horn
contig10057_a266	AGATAGCTTGCATACCTTTGATAAAAATTATCAAAAACTGAATCAATTGTATTTGAGTTATATATTTTTTCCAAGTTAAATATTTTTGATATTTTGGTCCTAATSCTGCAATAAGGTAGTACGTGTACATTATTATGTKTWCAAAAGAATTTAAAAATYCCGCAAATGTTGCTTGTCCCCCTCCAACATATTTTGCAGTTACCCAAATTATAAATGCCGTGGAAGSGTGATGATACAAGTGTAAAGTAGTCACTTGCGAATACTTTTTTTCTTAATATAAAAAATATTGTATCTAATAACTCAATTACTTTTGATAGAAAGTAAATWTAAGTTAAATGTAATACGTAGACAGCGTCTGGATTATTCGAATAAYCAACAGGTTCACATGAAAGATTATAT…	yes	contig10057	OtL009-B11			8.50486	-1.99117	-1.76524	4	693	Non-Horn
contig10080_a267	AAAAATGTTAAATGTTAAAAATAACACATTAAGATCTAAACATTCGACTAAAATTGAATAAAAGCAACATAGATATTAATAAACAATGTAATCCAAGTAAATTAATAATGCACCACATTCAATCACAGGTCTTAAGATAATATATAACATCAGTAATTAAAATTTCTTGTATACGTCTTATCATATTATCTTATCATTAAAAATACTATAAAACATATTGGTTTATATTGAATTAAAAAAATACTTTAAAAACTACTATGGTATAAAAAAATAGATAAAAAGGTTATGATTAGAATCATAACTTTTTCGAATAAAGGCACAATATTTTAATGCTCAATACTAAGCGAATTAAAACCCAGTCTTTTAACTAACGTGAAGATTATGAATCGATTATAGCGA…	yes	contig10080	OtL006-A07			10.3263	-2.36217	-2.23043	3	819	Non-Horn
contig10231_a268	GACATAAAATTTTGTTTTGGGTGCTTTGAATCGGATTTTAAGCTCGAATATGTCGAATTTAAAAGCGGGCGGGCAATCGGGTCGAAAAAAAGTCCAGGTATCTATGGTCATTTGTGATGTGGAAGAACGAAGACATAGATCAGGGGTAAACGCTTTACAATTCGATCCTATGTTAAATAGGCTTTATTCCGCAGGACGAGACTCTTTAATACGAGTTCATGAACATGAAAGATATCTACAAAGTATGGAACATCACACCGATTGGGTTAATGATATTGTTTTGTGTTGTGGAGGTAGAAATTTAATTTCAGCAAGTTCTGATACAACAGTGAAAGTTTGGAATGCCCATAAAGGTTTTTGTATGTCAACTCTTCGCACTCATCGAGATTACGTCAAAGC…	yes	contig10231	OtP020-H04			8.86697	-2.5095	-2.16282	3	744	Non-Horn
contig10490_a269	GTTGACGCTTGATCCTCGATTGTTGTGGTTKAGTTCGGTCTTAATTCAGTACGAGTTCGTGTTTCGCCGGACGATCAGTTTTGGAAATCATGAGTTAATTGATACTCCACCGAAAAAGAATCTCCATTACCAATAATTTCAATTCATCATCACTTAAAATTTTTGTTCCTCGCACATCGGATACCTTCAACGGAAAAGAAACCGTGTTGTGTCGCGAACGGAGAAGGCATGTCGGGAGTAACGTTGACGTCGGGGACGACGACATCCGGCACGACGGTGAACACGGGGGCCGTCGAATTAACTGATAGCGGGGGCAGAGCCCTAAAACTTCAAACGGATGCCCCGCACTTGGTCAGCATGGGAGGAGGTAGACTCAGCACGGCGGTTACCTTGCACCCA…	yes	contig10490	OtP013-F07			9.51154	-2.28295	-1.2538	4	1438	Non-Horn
contig10520_a270	TGATGAAGATGAAAAGTAGTAAATAAACAATTAAGAAATAACAAGAACGGTTTTGCGCAACTACAAACTAATTTTACAAGGACTGTACTCAATTTTAATKGAGTGTACCTGATATACCTGTTGTTATCTCGACGTTTTTGGATGATTCCTAGTTTCTAAGTGACACGTATGCAGTTATTTTTAGTGAAAAACTAACGTAAAATGGCGCGATACTTTAAAGAGCAGGATATCGTAGAATTTAGAGAATGTTTCTATTTATTTGCAAGATCGGGACAAATTAAAACTCTCGATGAACTAACCGTTATAATGAGAAGTTTGGGTTTATCACCAACYATTTCAGAATTGGCTGGATATTTAAAACAAAAGGGTGGAAAAATGACTTTTGCTGATTTTTTGGAA…	yes	contig10520	contig_355			9.64037	-2.10969	-2.47397	4	820	Non-Horn
contig10522_a271	CGATGTTGTCAAACTTTCAGCCCCTTTCTTTCTCCAAGGAATTTGACATAAAGTAGCTCTTCGTATGGGTTTTCTTGCATCGTCGTCAGTCAGTGAAGTATCCCATGATTTATTGGGTGTACAAAATCCAGTTATGAGACAATCAACGCTTGAAAAATGCCAACTGTGTCGCGTGGTGCGTTTTAACGAACACATTTTTTTTAAATTCCGATAACGTTCTCGATTAAAACCGTCTGGCTGCTACCAGAAARCTGCCC	yes	contig10522	OtP010-F06			9.88944	-1.97614	-1.8601	1	257	Non-Horn
contig10598_b872	GGATATKGTTTACTTTTATTTTAGGTTAAGGTTATGTCAYCMTAATTTTTGAGGTTATTTTTTTTTGGAAATTTAAGAAATTAAAASTRATTATAGCCATAAAACGTTGGAAAAATGAGTTTTAATTTAATAAAGAATGGTTTTAACGTTTTATTCGCTACCGTAACATTTTTAACAACGTTTTACACCATGGCCCATTTTACGTTCTTTTTATCGAATCCGAATTATTTCACTCCAAATGAAACTCATATTCAAGATGATTTATTCACGATAATTCGAAATTTATTTATCGATACCATTCTAATATCGACGTTTATTCTACAACATTCTTTAATGGCACATAAAAGTTTTAAGGAATTCCTATTAAAGTACAAAATAGAAAGTTTACAACGATGCATT…	yes	contig10598	OtL004-F10	OtL005-H08		8.83102	-2.21294	-2.11549	4	746	Non-Horn
contig10672_a272	TTTGACCTTAAAGTTTATTTATACCTGTTGCTCCTACTAAATAAAACCGTTAATTTTACCTGATTTTTCTCCTCATTAGGTKGGTAAAGTGAAGGATTTTTAGATATGGACAGAAGTGATTTAAAATCTTCCGCGGGAACATCGTCAAAGCAAACCGATTTTTTGCAAAATCCAGCTGAGAATACATCAAACGACGCAGTATTGTTAATAGATTTTGGATCAAGTGAAAACAGTGAAGATTTAAATATGGGAGGAGAAGAAAAAAAGGAAGATGAAAATTTCGAAGCTGATTTTGATGGATTTTTTAAAAAATCTCCCAATATAGCTATAAATATAACTGAGGATAGTGATGAAAGTAATTTTGAATCTTCTGACAAAGATCTAACAACAAAATCTCCT…	yes	contig10672	contig_19			8.03744	-1.68728	-1.71389	2	597	Non-Horn
contig10683_a273	GGCGCCTTGCTTTGTTTAGGTTGGTTTAGGTTAGGTTCATTACCAAAGAAATATCGTACATTTTATCAAAAATGTCTCAATTAACTCTTGACGAAATGCTTATTAGATATCCTGARTGCATTAGAAGTAATCTAAAAGAACTTGTTACAAATGGAATTGGTTTAACAAAATCTTTGATTCAAATAAAACTTCCATCASTTAAATTGTTGGATAACTATGATATAAACTGCAATAATTCAATAATATTGGATTTACCTTATGCAGGCAAATTCCTTTCGGTGGAAATTATTTTCATTGATGAAGATTTAACATTTCCTCCCGATTTTGATATTTTGAATGATACATTTTTGGATGATCCGGATGTTGATTTGATTGAAAAGCATTTGCCTTCACTTACTG…	yes	contig10683	contig_403			9.67569	-2.40323	-2.17686	1	1160	Non-Horn
contig10686_a274	GGAGATTCTTCTTCTGAATAGCTGTCGTCACTTGCTGTTTCAACAACCTGTAATGTTTGTAATCCACCTTGAGCCGTTTGAATGACAGAACTTGGTTTTCCCACTAATATAACGTTCCCTTTACTTAAAACCGGCTGTATATTTGTTGCTGTTTGTATAACTGATTGCTGATTCGGTTGAATCACTGATTGTACCGAGGAGGCTATCGCCACTTGAGGATCAGGCGACGGTGCCAACGGGTCAACAGACCCATTTTCTTCCACTATGCCCTCCATTCCTCGACCAATCAAACACCGGTTACGTGTGTCTCGTCACTGGCGAGCTGTGATCGGAGTGGGCAACGGCCGTAATACGTAGTAGCCACGTCAAAGTGTGCGGGCGCTCGTCACTGGAGGAGAA…	yes	contig10686	OtP004-B11			8.4968	-2.53568	-2.56704	3	727	Non-Horn
contig10690_a275	GGTCGATGTGATAATTGATCGTTTAATTGGTCTGCCAATCGTGCTTTTTTCAACATTCGTTGTTTCTCTGCTAAACTTGGATCTACATGTCCCGGGTCAGATTCTAAAATATGTCTCCGTTCTAATTCTTGTCTTGGTGGTCTTTGTTGGATTTTTGCTTTAAGCATATCACCGGTTTTTGCACGTTCCAGTTGTCTTCTTTGTCCATAATAAGCTGCCGGCGCTTTTAATGGAGGCATAATTCCTTGTGCAACAAGTTGATCCACTGGACGTCTTACCATCAATTTGACCTTGAGGGATTCTTTATTTTGTTCGAGTGAATTAAGTAACGGGGATGTGTCGACGACCGCTTTCGGTGGCGAAGCCCTCGGGGTCGACCCCTGATGACCGCCACCCTCC…	yes	contig10690	OtP013-A03			8.26965	-1.79995	-1.6782	2	652	Non-Horn
contig10709_a276	CTCGGAATGAATTCAGGTGCTTTAACCCATTCTTCGAGATTGATGGTCGTTTTAAGATTCATTAAATTCCGCGAAGATTCCCCTTCGGATGATTTTTGATCCGGTACTGCAGCTGGCCGTGTGAATCGATTCTTCAGACTTGGGAGCGTTGGCTAACGATGAAGAGGCACTATTGTGTGACGACGTAGAAGGCATATTGATTCCGTGGGTACAAAAGCAACCGAATTTACTGTCCGCCATCTTTAAGAACGGTCAAAATCTTTGGAAAACAATGGTTTTAAACCAATTCTTGAACTACGGCAACCAATCTTTACGCTTGCACCACCAATAAAACAATGCATTTAACCGTTTACGAACCCCTTTTCAATATGAAATACGTCGGTTACGCTCTCTCAACTA…	yes	contig10709	contig_293			11.2813	-1.35721	-1.34813	4	461	Non-Horn
contig10730_b873	AAAAATAAAATAAAATAAAACAAAAGTGTTTGTATAAATAGATGAATAGGAAAGACACATTTCTTTTCTTAATAAAATCCTATACAAGTATAAAATAAGATTATAATATAAAAAGTCTGTATCTAGTATAAAATAAAAGTAGTATTTACATAAAGAACTCCTGCGTGGAGTAGGACAACGCAAGTCATGCGTTTGGAGGCCTGTCCAGACAGCTGATTTCGATCACACGTAAACCCCTCAAACTAGGATCAGTCACATTTAACCCTCTCGGTTGATAAACCCTTTCGTTTTGTTCTGCTACATATTTAGATACTTTCCTAAGACATTTCTCATAATGAGTCTCCTTACAAACATAAATTAAATAAGCGGTAAGACATGCTAAACATCCTTCGCAATAAG…	yes	contig10730	contig_231	OtL009-F07		9.15677	-2.30322	-2.5265	2.5	741	Non-Horn
contig10833_a277	AGAAGTAAGCAGTCAATAGCAAGTTGATGTACTCCTTTGAGAATAATGTAAAAACTACGTATAATGAAACAAGAGCACATGATGCCATTATTGGGAACATCGCTGCATCCATCTTAGTCATTTTATCAGGTTTAAGAGCCCCTCTTACCTTCTCCTTATGGTAATTCACGCTCCGGTAAGAGCCAAAGAAAATGGGTAAAATGGCCATAATAACCAAACTCCCGTAAGCAACGGCCATCCCTTCCGGAGTACTCGGGGGCCTTCCTGATGTATTCGTTGCATTTTCRGTTGTATTTTCACTAGCCTGAGCCAGAAAGCTAAACACCACGTCTGCCATACTTTGAATCACTTTGAATSAAGAAACTGACGTGCACCGATTTCGACACGTCACAAACGTCCC	yes	contig10833	OtL010-E02			8.97057	-1.63797	-1.11389	3	400	Non-Horn
contig10985_a278	CTATTTTTTGCTTCAAAAATCGTTCTTCCAAACTCCCGCAGCTTCATCATTGCATTTTGAACAAAACTCCAAGGATACTCGATGTTTAGAGACGTGAAGACAAACCCCAACATCTTCTTCACCTTCATTATGATTCCGGGAAATATAATTATGTTCTTCAAAAGTATTTTCAGTGTTATTCACATTAGTTTCTTCAATTTGTAATAATTCAGGATCATTAAATAAATCTCCAAAATCAATTTCATTTTTTACGGAGCTAAGTAAATCTTCTGTGTTGCTCAGAGAACAATCAGACTGTGTTATGATGTATCGAACGTAAAATGGTTGTAATATCCGTACTGTTCGCTAAAACATTTTTGACATATCTCACTTCTYTCGTTAATTGATTAATCATTTGAC…	yes	contig10985	OtP007-D08			8.17096	-1.79964	-2.06571	1	750	Non-Horn
contig10989_a279	GGSAGTAAGCTAAGTAACAGTGTTGACTTCACGTCGGCCATTTTCTACGTTATTAAAACGACCATGCGTTAGAAGATTCTTAAGAAATTTTTCGTTCGGATTGACTAAATTYGTTCAATTCCGTGTCACTGGTTACTTTCACCTTTTGTTATCATCATGGGTTCTAAAATTGAATAYGTCGATCAATCACAAATTTACGCTACAAGTTACGTGAGGAACTCGAAGGCCATCGGCGTTTTATGGGCGATCTTCACAATCTGCTATGCAATAATTGGGGTAGTATCGTTGATCACACCAGAATGGATTGGATATTTGGGCACGGAATCGGGTAGTCAAGGAAAAATCGGTCTTTGGTCAATTTGTTATGCCGCCGAAGAAGGTACCGAAAGTTGTAAAGGA…	yes	contig10989	OtL013-H05			10.1871	-1.20706	-2.35209	4	1231	Non-Horn
contig11006_a280	ATTTCTTGGAAGAAGTCTAAATGTGGCGGTTGGAGGATATCGAGCGCTGATAATACGTTTTCGTGTTTGAAGAAACAGAGCATCTTCAATTCCCTAAACACCCGTTTTGAAGATACCAACGACTGGAAYACGTTCGGCAGTTTTTTCAAAGCGACCCTTCGYCCATCTCTCGGGTCTGTCACAGCCCATACAACTCCAAAGGCTCCATAACCAATGGGTCGATCCGGTTGTACTTGTTCCTGTGTATGAGCCGGTGCCGCGGCATGTTGCGGATGATAATACGGTTGGGCCCCGTGCAATCCGCCCTGTTGCCCGGTCGCCGTAGTGCTCGCGGCACCCTGCATTAAGGACATAGACACAGACATGGACACCCGAGAGTGGCGACTGGGTCCCACGACA…	yes	contig11006	OtP013-H05			9.45942	-1.22371	-0.880513	3	807	Non-Horn
contig11053_a281	AGGGCGGCGAGCTCGTCCGTTCGTTTAGGTCGATTAAAATTAACGCCTTTTATTGGTTCGCGGCGAGCGACGTGCACCAGTATATCCAGTAATATACGGTCTCGTCGTGTTACATACGCCAGTCCGAACTCGATTGTGATCGACGTGTCAGAGAGTTTGTTTTACCGCATAAAACGGGCGTCGTCGTATTATAACAGCCCCGCATGTACGCCGAACGGCAACGACTAATGGAAATTTTTTACGAACGGTCTGACCGCCCAACGCGAGCGAGTCGTCGTAGTAATTAATATTTTTCGCTTGTCGGATTAAAAATGACGTATCTATGTTCGGAGGCGGCGATGCGATGTACAGTCMCGTTTTAGCGTTAATAAAACAATACAACACGGCTTCGTCAGATCG…	yes	contig11053	OtP014-H03			10.969	-0.509721	-0.617488	3	788	Non-Horn
contig11085_a282	GACTAAAACCATCCCAGCAGGCTGTGGGTGTGCCCGGTATTTCCAATAATTCCAGTTAAATCTTATCTTTAAAAACTCCAGTCTATCACGTTAAGCAGTTTTAAATCATGGCTAGTCATCAATACTACCCATTTAAGTGTACACCAACTGTGTATCCAGCGGATCCTTTTGATCCGGTTGCCGATGCCGCAACATTAAAAGCGGCGATGAAAGGTATGGGAACGARTGRGCGTGCCATTATCGATGTGTTAGCGCGTAGAGGAATCGTTCAAAGATTGGAAATTGCCGAAACGTTTAAAACGTCGTATGGAAAAGATTTAGTTTCCGAACTAAAGGATGAATTGGGTGGAAAATTCGAAGATGTTATGATCGCCTTAATGACCCCCTTGCCTCAATTCT…	yes	contig11085	OtL001-G07			12.8611	-1.43933	-2.54464	2	496	Non-Horn
contig11170_a283	GATTTAAATGAATGTCATTTGTGACGGGGGGATCCGAAATTGGCCAAGCCGGGTCCAGGTGTTGGTTGACCTTCACATCTAAGTTGTAAAGTTTCGTTTTTGGGAGGACATCGTTCCATGTTTGGCGCAGCTTAAACATTTCTGAACGAGTTTTTTCGTCCACCACTTCAAAAGTTTGACAAAATGTGGAAACAATGTTCTGACTGAAGAGGGACAAGTAGATTCCACCGACAGTCTTCATAATACAATCGATGAGGTACAACACTGGCAACTTGATGTCCTTGGGCACCTTATCGAGATGAGATTCGATGGTGGCGACGATATCGGATGCATGGGCAACATTCTCTCCAGCCAACATTGTAAGCACGTTTATCATCGGTTTACTGTTGCACGTCAAAT…	yes	contig11170	OtP015-D11			9.54458	-2.36065	-1.63964	0	695	Non-Horn
contig11327_b874	GGGGGGGGGCGTGACGKSACATGTGACGTCACCTGTTATCGTTTACGAGCAACACGCGTTCCTCAAATTTGAAAGCAATTTCTGGTCGTTTAGTCTCCAACGGAATGCCTATTCGACAGTTCAAACGCCTCTTTGGCCACCGATGGCCGCTTCGACTCGACGGAAACCGTCAGCATAGCTCTTTCGTGAGGATCGTCGAAGTCGGGCCCAGGGATGGCCTGCAAAATGAGACGACGACCGTTCCGACTGACGCAAAAATAGAACTTATAAATAAACTCAGTGACACCGGCCTCAAGACAATCGAAGTTACGAGTTTTGTCAGTCCGAAATGGGTACCTCAAATGGGTGATAACTTAAAAGTTTTTACTGGAATAACAAAGAAACGCGGGATTTCTTACC…	yes	contig11327	OtL012-C01	OtP018-H02		8.62139	-2.11187	-1.42231	2	648	Non-Horn
contig11425_a284	GGCGGAGGGATGTTGTTAGAGCCGATCGCCCGGCGAATCTGCTTAGCGTTGGCAGAGTACGGCGGCAGTTGAAGAGATTTTCGAGTGCTTTTCGTGTCAAAACAGTCTTCTATACCAGTGTGTATAAAGGCTGATAAAAAAATATTATAATCTACGTCGCCATTTTATATTTAAATTCATAATCACGATCGTTCGACGATTTTGTTTCATTTGTTTTTGAGAGTTCGCCGAGAAAACAACTTTTATAAAATCATGAAGGCCATGTACGGTGTTGTTCTGTTATTATGTTCCCTTGGTTACATTTCCGGGGAATTACATTGTCAACATAAAAGGCCAAATATACCAACGGAATGGAT	yes	contig11425	contig_131			12.9942	-1.40005	-1.74078	3	356	Non-Horn
contig11483_a285	GAATACTTAATTTAATCATCTCATCATGTTAAAGGGGACTGTTTCTTTAGTAACTGGAGGCGCTTCTGGTTTAGGAAAAGCCACGGTTCAACGGCTAATTCAACAAGGTGGTCGTGTTGTACTATGTGATCTCCCCGGTTCTAAAGGAAATGAAGTGGCCAAAGAATTAGGGGGTGAAGATAAAGTTGTATTTGCCCCTATTGATGTCACATCAGAAAATGATGTTAAATCAGCTTTAGATATTACAAAACAAAAATTTGGTAAATTGGATAATTGTATTAATTGTGCTGGAATTGGAACTGCATTTAAAGTTTATAATTTTAATAAAAAGCAAGCACATACTTTAGARGATTATGCAAAAGTTATTAATGTCAATACAATTGGCATGTTCAATGTGAT…	yes	contig11483	OtL013-C09			10.0144	-1.46581	-2.23069	3	870	Non-Horn
contig11558_a286	GGCCTAAAACAAAAATCGTTTGGTATTCTACAAATTTATTTAATCTCGTGTTATTTTRGAATAAATTTTTAATATGGCAAATAATCTAGATGATATTGATTCCGAAGGAATTACAGAYTCGCCAAAAAAGGGGCCTACATTATCWACTTCYACATCTAGTTTTGAAGCTTTGGATCCTCACGATCCAAATTTAAGCCGTTTAGCAACTACAATGTTCAATAAAACAGCTGATTATTTATATGGGGAGTTAACATCCACTTTAGAGGATTATAAGTTGCTTGAAAATATGAATAAAGTTACTGCTACGAAGTATTCTGATATGAAGCAGATTGCTAATAGTGTGGAGAATAGTATGGTTGATTTGAAAGAAAAATATGATATGTTACAACCATTTTTGGA…	yes	contig11558	OtL002-C03			8.27535	-1.98398	-1.93266	0	786	Non-Horn
contig11613_a287	ATACTGTCTTTTTCGCGATCTCTTAAACCACCGCTACCGGCGTTAAAGCTCGAGGTATACTTAGGTAAAGTAGGTGGAGGAGTTGGTTTATTTTCACTGCTGCGATTCAGTAACCCACTACTTGAAGTATACATATAACTACTCGGCATAATGTTTGGTCTACTTTTTATAGTAGCCGTTGCTTGCGTATTGGAAGACGCCGGAATCGGCGTCGAATTTAAATTATTAGTACTCATTATATCTTCTTTTTAAACTAAATAACTTTTTATTTGAAACTTCTTTTAACTTAATTCTTAACACATCTGTACATTTTTTTTAAACTTACACCAACAAACAACAACGGTTTTTGATCTTGACAGTGACAATCGTCGATGAGTAATGAACTGGACGGCCACGCCC…	yes	contig11613	OtP005-E04			9.52516	-1.48643	-1.91858	2	606	Non-Horn
contig11647_a288	AGTTACTTTTAACGTCAAACAGGGTTCCTCGAGATCTCCTTAAAAACGCCGAAATATAATAATAAGGTAATAATAATAATGGGTGATAGTGATCGCATGCCTAAAATTGATGTCGCTAAATTGAGACCAGCCGAAATAGACTTCATTCGTTACGTTGAAAAGCAAAACAAAGAACGCGTAGAAAAACTCAAAAAAGTTCGACGAAATAACCTCCTCACAGCCGGAATAATTGGTTGTGGTGTATTGGGAATTTACTTTTATTCTATGTACGCAGTGAAACAGGAAACGTTCCTGGACGATTTTGAGGAGCCGCGTAAAGTAATCGAAAAACAATAATAATGTCCGCAGTAAACGCTTTGAGATTACCTCCTTTACCTTCTGTTAGAGATTTAGTTCGTT…	yes	contig11647	OtL008-A12			9.86602	-2.39525	-2.51674	0	815	Non-Horn
contig11679_a289	GGGACGTTTCCTTTTCTATCGCGTTTCTCCATTGGCGTTGACGTGCGTTAACCGTAACTAAACCAAACGCGCAAAAATGTCCGGAGGATTAGATGTGTTGTCCCTCAAAGAGGATGATGTTACGAAGATGTTGGCGGCGGGCACCCATTTGGGGCTCACCAATGTTAACTTCCAAATGGAACAGTATAARTATAAGATCCGTTCTGATGGGGTACACATCATTAATTTGAGACAYACTTGGGAAAAACTTCTTTTAGCGGCGAGAGCAATCGCCGCAATTGAGCACCCCCATGAAGTATTCGTGATTTCTTCRCGTTTACACGGTCAAAGAGCCGTTTTAAAGTTTRCAGCTCATACCGGGGCTACCCCAATAGCCGGACGTTTCACCCCAGGTGCCTT…	yes	contig11679	OtL018-G06			13.6769	-2.60618	-2.5872	4	994	Non-Horn
contig11712_a290	AAAAAGCGATAGAAATAAAATTTATTATGTACAAAAATACTACATATATTACACRAAGAGGACACGATTGATACAAAAAGATGTGTGGCACTTAGCTTTTTACACGGGAMAGAATAAAAATAGAAATAATAAAAAAATATAAAAATCTACAAGAGGACTAGAAACTACTACATTGGTACGAAAATATTCTTTTTTTAAGATAATTTTTAAAGARATAAAAATTAAAGCGAAAGGGGACTAAGAATAAAGGGTTCGATGAATTTTTATACTAAARTTGTATAAATAACATTTTTAATGTCGTCCAACTTGATCRATTTGCTGCTGTAAGTTGCTAACGACTTCAGGTGGAACTTGATCACCCAAAATCTCAAAGAGATTAATTTTTTGATTGACTGGAAT…	yes	contig11712	contig_217			8.61874	-2.16853	-1.29057	2	661	Non-Horn
contig11730_a291	GGGATATCATAAGTTTTAGCAATTTCAATCAAATATTTTTCAACAAGAAGTTTTGGAGGGCTCTGAATTGACATTTTATGTTTTAATTTAGGGCTTATTCTTGTCTCAGATTCGTTTCTACACGCTTCAGCGAATTGCAAACCATATTTTCCTGCTAATAAATCAGCAATCACTTTTAATTCAGGACAATCGGATTGTAAACGAGGGGCRACCCACATTATACTAGCGATAGCTTCAGCTATACCCTCATCTAAGTCTTTCATTTGGGTGATTAAACCAAATCGTGCCAATAATAAATCACAGTACATTTCAACAACTTCCATAGCTTCAACTAAGTAATCCTCTCTAACAATATGTTCAACACGGATTTTAGCACGTTCATATTTTCCAGCTTGGATA…	yes	contig11730	OtL011-H06			9.72537	-2.08731	-1.80395	3	644	Non-Horn
contig11786_a292	GGAGTGCGAGACGAAAGCGTATCGAGTGCGGACCAATTCATCGACAAGCACGTTGAGTGCCACGAGTAGTAGTAAAAGAGCCGCGAATATTGTGCCCGAACGGAAACCCTCAGACAACARCAGCCAGGTCAGGATGCCCGAGTCGAAACCGTTCCAAAGATTACCGGACACCGTCARGCCCGTTCATTACAGTCTGACCCTCAAGCCGGATTTGAAAACGTTCGCCTTCGATGGGAGGCTCGCCATCGAAATCGAGGTTGTAAAACCAACAAATAAAATCGTACTTAACGCCTTAGATTTAATAATAAAAGAATCAACGGTAGAAAATATCAAAGATGAGAAATTAATCGCAATTGAAAAAGTTAATTTATCGTCGGAAGATGAAACGGCCGAATTTTG…	yes	contig11786	OtL012-G03			8.5854	-2.59552	-1.92387	3	734	Non-Horn
contig11825_a293	GGACTAGGTGTGTTAAGTTTACCGACGATCAAAACGGTGGTTTTTCGAGGGGCGAAAACCGAGCGGTTCGAGTTCGATTGGGGGCCCACCCTCGGCGCCGATCGATGATCCAATCGTAACCGGTAATTGTCATGTACGAAGAATTAAAATCGACGAAAATAATCGTGGTCTAGTCGTCTTTGCGATTGTTTTTTTTTTGTGCTGTCAATTTTTGAGCTGTCAAAAATGTCACTGCCTGGGACACAAGGCCTATCAAAATTAAAGAAAAAACACTTCAGAGTTAAACACCAAAAGGTTAAATTATTTCGTGCGAATGAGCCGTTTTTATCGGTTCTAATGTGGGGAATTAACCACACCATAAACGAGTTAATGCATGTTACGATCCCCGTTATGCTTTTA…	yes	contig11825	OtP009-G11			10.1521	-1.91387	-1.43626	4	1244	Non-Horn
contig11835_a294	GGAGAGCCTTCAAGACCACGAACAACATGAAGGCATTTATAACATTATTGTGTATCTGTGCTGTTGCGCACTCCGTTGAAGTCAAAGAAAAATCGGTCGAGCAGGAGTCAAAGAAGCAGGAGAAACGCGGTTTGTTCCTCGGCGACCATGGATTTGGAGGAGGCGATTTCGGAGGTGGCGACTACGGAGGTGGACATGATTTCGGTGGTGGCGGCGCCGACTACGGCGGTGGCGATTTCGGTGGTGGTGGTGGCGGTTACGGCGGCGGACATCATGAAGACGTCAAAACGGTTGTCGTAGAAAAGAAAATCCCAGTTCCATACACAGTTACGAAACACGTTCCTTATACGGTTGAGAAGAAAGTACCGTACGAAGTTAAGGTCCCGGTACCACAACCCT…	yes	contig11835	contig_9			10.2657	-0.918097	-1.13862	4	1333	Non-Horn
contig11848_a295	CAACAACGGAATGCTTATGCAGTTAGCGTTTGGCGAAGAGTACGACAGAAGTTGGAGGGRAAAGATCCGGATGTTGGGAGAAAATATACAATCCAGGAGCAGGTTGAACATGTAATCAGAGAAGCGACAAGTCTTGATAATTTGGCCCTATTGTACGAGGGGTGGACACCATGGGTTTGAACGGCGACGAACGAAAAGCAGTTACCCTGCCTGGATCTCTCTCTTGAGTAACAAAACGCATCAAATAAAAGGGCGTCCGTGTGCAAACAAAAAAATAAATAAATAAAAGGGCGCGCCACGAAGCGAACAGCAGCGTCTCCGTCGTCTATAACTTTACTAGTTGTTGGAACCCAGTCGCTTAGTTTTATTGCTGTTGCAAGAATAATTACAACTCTACCT…	yes	contig11848	OtP004-G06			8.77752	-1.63568	-1.40904	2	463	Non-Horn
contig11885_a296	GAGTTCGATTCACAATGAATTCACGAATTTTCTTTGTTCTCATCGCGCTCCAAGTTCTTTCAACCTACGCAGCTCCAAGATCAGGATGTACAATTTCGATTAATAACGATTTGGGGGATCCCCAACCCTTGGTGATAAAACCAAACGGCGGGGTGGGTCAAGAAGCTTTTTATCAACCAACTTCCGGTGATAAAATCGTTCTTAACGACGGAGATGTCGTTGAAGTTGCTTGTCCCAATAATAATTTAGTAATCGATGGAGTGTCTGGAAATAGAGTTGACGAAGCGRTTTGTAACGGTGGAAAATTCGACATCGACGGCCAAACCGTTTACTTTTCCGATATCACATGTAAATCAAATCCTTATCACGTAGCTAAAAAGATAGAAGACGCCACKTGCA…	yes	contig11885	OtL013-B12			12.1966	-1.00274	-1.65597	3	1092	Non-Horn
contig11901_a297	TAATGAAATCGGGGTACTTTGCGATGCTTTTTCCGTTACGTTGACTAAAACGGGGTTACGAAGGCCGGCGCGAATCAAATTTTCGACTTCTNTGGTTTGCGTGGCTGAAAATAATCCGGTTCGGCGTTGTTTCGGAAGGTAACTTAAAATCGTATTTATTGTTTGTTTAAATCCGAGATCTAAGAGGCGATCGGCTTCGTCTAGAATTAAAATTTCGAGGTTTTTCACTGATAAGGATAAATTAATTTGTTTTTTCGTCGTTAATAAGTCTTCTAAACGCCCAGGAGTACAAACGATGATGTTTCCTCCGTTTATTTTGAATCGATTGATGTCTTCTTCGACGTTGTTTCCCCCCACTAATAAAATTTGCGTGATTCCTTCAATTCGTTTTAAGAGTTG…	yes	contig11901	OtP004-B03			8.99562	-1.39863	-2.85296	2	759	Non-Horn
contig11913_a298	GGGAAACATTCAACTTTGAACCTAGATAAGTAATTGCGTAAAATTCCGTGTGGATATCGAAATAGTTTTGCGCAATTAGTTTACGTTAAAATACGATAAAATTAAACTAGATTTAAAAAAAGTTTATTAATGATAAGTGATGAGTACAATTTCTTATCGCTGTGTGGCGCTGATTATGAAAAATCACTGGAAAAGTGTCAAATGCTTCTGACACTAGGGTATGGTTGGTAAGTCTCGATCATTTTGACAAGAGTACGGGGACCGTTCGAGTTCCTAAATAGTAAAATTATGGCTGGAATGCTAACCATGGCTTCCAGAAATATGTCCCGATCGGTAATTAGGGCATTGAACGAATCTATCAACACCAAAACCTTACAGATTGGGACAAGATCTATTCAG…	yes	contig11913	OtL008-A04			10.9203	-2.88074	-2.0687	3	1192	Non-Horn
contig12039_a299	GTTGCGATTGATAGAGTTGTTGTTGCGATTGATGAATTTGTTGTTGGGGTTGATGGTGTGTTGGTTGTTGTTGTTGAATTGGTTGTTGTTGTTGTTGTTGCTGAATTGGTGCTGCGGCGTATAATGATTGAGATGCTGGGCGAACTATATTACTAAGTACTTCTAGTGAATGGAACATGGCCCTGGCGAACATGTCCGCGTCTTCTTTAGAGCTAAAATTTAAACCGTAAACGTGTTTGTTGTCCCTCCATTGATGGAACGTGGCCGTAGCCTGATTGTATTTCAGTCCTTTTAGTATGGCACAGTTGATAACCACCTCTTGATCTTGTAACTTTCTGCCCACCACTCTGAACGTCTGATGCACTGTATGCTGATATATTTGCACCTTTGACACTCCAG…	yes	contig12039	OtP001-C01			8.73374	-1.19473	-1.82574	3	681	Non-Horn
contig12086_a300	GACGATTACTTCCGCTTCCTTCCGAAAGGGTTCCTCCAGCTCGAAAAGAATCGTTAGATAGGGAACGTAATCGTGAACGCCGCGAGCGAACCCCTGAAAATCGGAGAGGTAGGAAATCACCCGAAGAAAGGGGCCACGAAAGAATTGAAAGAGACAAAGAAAGAATTGATCGTTATGATAGAAGTTATGATAGAGAACACGAACGTGAAAGAGAACACGAAAGAGATTATCCCGTTATTCCACGCTTACGAGAAGATATCCGCGAAATTGATAAACATTACGAAAACACTTACGATCGACCACCAAGACACGAAGATGTTCGTTATATAGATGGCCACTACGAAGGTAGAGATGAAAGAATCCCATTGACGGAATACCCAGATGAGCGAAGATCAAGAA…	yes	contig12086	OtP011-E09			9.48753	-2.21925	-2.48396	2	1028	Non-Horn
contig12109_a301	ATAATAAAAATAAATCACTCAGACAAATGAAATAAGTTACATCCWACAAATTTACAGATCCAAATCAATCGTCATCAAAATCCTTAATAGGCATAATGAACACMTAATCCTTCGAATGTTGTGTGAGCAACAGCTACAGCTGGTGAGTAAGAAAGTGCGGCGGTTTTAACAACTGGGGCTGCAACTGGAGCGGCGTAAGAGATTGGAGCATGAGCAACTGGAGCGGARTAAGAGATTGGAGCATGAGCAACTGGAGCGGCGTAAGAGATTGGAGCATGAGCAACTGGGGCGGCATAAGAAATTGGTGCAGCATGGGCAGCATAAGCAACTGGGGTGTGAGCTACGGAGACAGCATCGTTGGTGATTCYCGTGTCGTATTTCCTTACAGATGAGAAGGCG…	yes	contig12109	OtL004-H07			10.6795	-0.76903	-0.681694	3	727	Horn
contig12142_b875	ACTTCAATATACGCACTAAGCGACTTSCTTTCTCTACAAAACCAAAATGTCTAAAAGAGGACGTGGTGGTTCCGCAGGAGCCAAATTCCGGATATCACTGGGTTTACCAGTTGGAGCTGTAATAAATTGCGCTGATAATACAGGAGCAAAAAATCTGTATGTAATTGCAGTACAAGGTGTTGGTGGTCGTTTAAATCGGCTTCCAACTGCTGGTTCTGGTGACATGTTTGTCGCGACGGTTAAAAAGGGTAAGCCAGAACTTCGTAAGAAGGTAATGCCTGCGGTTGTGATCAGGCAAAGGAAACCTTTCCGAAGGAAGGATGGCGTTTTCATTTATTTTGAAGACAACGCTGGTGTCATTGTGAATAACAAGGGGGAGATGAAGGGTTCTGCTATCAC…	yes	contig12142	OtL005-H07	OtL013-F04		12.0703	-2.02919	-1.90093	3	535	Non-Horn
contig12182_a302	TTGTTTTATTTTTAACTTCATCTTTAACATCATCATCCATTCCCAACAAATCATCTGGAGGTTGTAACAGCATATTTCTTTGATTCATTATGTAATGTCTATAACATTTACCCACAGCATAACCCAATATCGAGATGATTATAGTCACTAAAGCCATTACAAGTGGATGCGTTGGTTTAACAGTGTATAAATAATCTAAAATGACTAGAGAAACTCCTAAAACAATTCCGATTCCACTTCCTAACCAAGGAATCTGTTCATTCACTTTTGTGTCGTGATGATATTGTCTCCGAGCTTTATGAATACAACCCAAAATAAGATCATCGTTCGGTTGAAATTGCAAAGCATGTTCATAACTTAAAATAGCTTCAGTAAAATGTTCCGTAGCAAATTCAACTT…	yes	contig12182	contig_205			9.09668	-3.59036	-2.04258	2	746	Non-Horn
contig12196_a303	GGACTCAARTAAATGATTATTAGTTGAACCGTGTCACATTAAAGTCGTTTTCTCAATTTCCGGTCGGATTTAAGCAAAATTTTCGTTAAAAATGTACTCGAGGGCTTTAAGACCGTGCTTAATTACGTTCCAAGTTCACGGGAGACACTTCTCGTCAACGAAACAGAATAATCGTCGTGTCACCGTAATTGGGGCGGCTGGAGGAATCGGACAACCGCTTTCTTTGCTTTTAAAGCAAAGCGATGCAATTACCAATTTGAATCTTTATGACATTGTAAAGCACACCCCCGGAGTTGCTTGTGACATATCCCACATGAATTTTCCCGCAAAAGTTACTGGATTTACCGGCCCCGATCAACTAAAAGACGCGCTCCGCGATGCGGAAGTCGTTATAATCCC…	yes	contig12196	contig_24			10.6976	-2.21791	-1.81626	4	1087	Non-Horn
contig12206_a304	ASGAGAGACCGGCGACGAGCTCCGCGGACACACGTTCTTACGTTTGTGTACGGTGCAGACCTCTGTTTGAGCAAGCCCATAAGCATCTCTTTCAGACCTGATTCTTCTTCGATCAGAATTCGTGCCTCTGAGACGCCGCCACCAGAAAAAATAATCAATTTTTTCTTTGTTCTATCACCAGATAGATCGTGATACGCGTTTTAAACCGTAGTTCTTGTAGTGCAAACGGCGTTTTATTTCAAGAAATAGAAGACGATGGCTACCACGGAGGAGAATAATGTACCGGTCGCTCAAACGGAAACAAAGGAGATGATCAAGGAGGAAAGTCCGGCGGCTGCGACTGAAAAAGCCGAAGAGGCAAAATTGGAAGCCGGCGGTGATGCTCAACAGCAGCAACAA…	yes	contig12206	contig_286			12.7135	-1.52422	-1.82157	3	952	Non-Horn
contig12214_a305	CTAACGTGGTGATGGACCGGAGCGCCTGCTTGTTGCAGCTGTGGGTCCAAAGTTTTGTCTGTAGATAGTCAAAGATAGGAACGTACGGGCACTTGAGGGTGTAGTGCCGGATGGACGAGGGTTGCATGTTGAAGGGCTGCCCCAGGGAGTTCTGCAGCCGCTGCGGAATAAGCCAATGGATGGTGCCATATTTCCGGTCCTCCTGGGAAGAATGGTGCTCCCAAATGTCCTGTGAGGGGGTGCATCAGAGTTGGGTGCGTGTTGGCTGCGTTAGCGGCTTGCTGTTTGGGCTTGCTAACCTTCGTGTTACTTTTAGCAAACTCCAGCCGGATCGTCTGAGGCATGTCGGGGTCAAACCTTACGCCCTGCTGGAGATCTTGCTTAGCTGCTTCTGCACCA…	yes	contig12214	contig_443			8.65384	-1.719	-2.24246	4	1418	Non-Horn
contig12238_a306	GGTAGCATCGCCATTTTGTGAAAACCTTTCATTCTCTATTTTGGGAGTGTCAGTGATTGTAAAAGAAGAGAGTTGTTGCGGTGAAGAAATAAACACAAAGTGAACGTACAAAAATCGTTCTAAATAACGTATGTTTCAATAAAACAAAAAATTTAACTGATCTATTACTTAGCACGTGTAACAATGGGTGTATTGTGTTGTGTTTTTAGGCGAGGTGAGCTGTGTCATCCGTTGTGTTGTCGTGTAGCGGTGCAGAGTGCGTATGATCTCTGGAAGGGACAGAATAACCGTACGGATACAAAATATGAAAAGGAGTAGTGATAGGGACACGCCACCACGCAGCAAAAGGTCTCGGTCCAGCATGGGCAGGTACGACGATAGCTCAGATGAGCGTATAAC…	yes	contig12238	OtP017-E04			9.318	-1.65586	-2.6141	1	1035	Non-Horn
contig12345_a307	GAAATTGATATCGCGGCAACTTTGGAACACTTGAGAGATCAACGACCGAAGATGGTTGCAACCAAACAACAATTTGAATTTGTGCTAACGGCGGTTGCTGAGGAGGTTCATGCTATTTTAAAAGCTTTACCTCCAGCACCAATACAAGAAAAGGAAAAGGATAAAGAGGTTAAGTAAAAACGGAGAAAAAAAATTAATTAAAAGCTTTCAACATTGAAACCAGCCTCAATGTTGAAAGCTTAGAAATCTTTAAGCTTTACATATCCGTTTTTTCTGAAGCGATATCGATGGGGTACATGTACGTTAATCGTTTTAAGAATAAAGTGAAAACTGAGACCTTTTTTTGCTTGATATCGAGATATGGGATTGAACGGAGATGTAAAATGGGGAGAAGTGATA…	yes	contig12345	OtP018-E01			11.2135	-1.03611	-1.91116	4	1247	Non-Horn
contig12354_a308	GGATCGTTCCACCAAATTGAGAAAGTATTTGAAGTATTCACGTTGTTCTTATCAAAAAACTTCGCTATTGGTCTTCACCATCATCACATCAGCAGCAATAGCAMCCCCTCCATTCTTTTATAATCCTTAAAAAACGCAACTGTCCAGGTCATCCCATTTCCAATTCGCACAGTTGAAAAGGTTTTCTGAGGTTAAGTGTCTTCCGGTTGTTGTACTTAATCAAAAAAATAATGGCTTTAAGAAGTATCTTCGTTAAAAATAAATCGGCACTAAATGAATTACTGTGGATTTCGTGTAAAACGAAGGAACTCCAGGCTAGATGTTTTAGTGTTTCAGGTGTGAAAAAGATGCGTTTTGTACAATTTCAGTTRAAATCTGGCGGCCCGAGACATGTTGGGG…	yes	contig12354	contig_97			10.3338	-1.74699	-2.65463	4	1263	Non-Horn
contig12362_a309	ACGGAGGTTACGTAAACTGTACAAAAAAATACAATTTCGATCGGTTTCGAAAAATTGCGTTAATGAAATAACACGTCGCCTCGAGCACTTTGCATCGCTGGGGGTTTTGCATGTTTTAAAACGATTTTATTATTTTTAATTAGAAAACTAACCGATAATYKRCSRRMSGATCCTTAGCCTTCAGGTCAACATGGCTGCGTCGGTAGGAAGGATTTGCGGTGCGGGTCTCTTAAAAACGAACAACGGTGTTGTTCTTAATCAAATAAGCTCTTATTCTACTGCCAGGGAATGGACCAGAGGAAGAAAAGCTCTCTTTGCAACAATTGGAGCTTTGGCTGGAGGGGCYGGTGCTTTAGCTTTTGCTTTAGACCAGTCGGTTCGYGCTTCTGATTTGGAATT…	yes	contig12362	contig_151			10.5663	-2.34577	-2.42233	4	1403	Non-Horn
contig12376_a310	AATATTTTTATTTAATAAGAATTAATATAAAAAGATAAGTTTTTTAAATAAAATAAATTATCAAAAACCTTGGCAGTATTATTAAAAAGGGATCAAGAAATTGTCTTAAATAATAATGAGCAAATTGTGGTCAATTATGTTAATAATCAGAAGTTATAGACGTATTCTAAAAGTGTTGGCAAAATCTGAGTTTTTATCAATAATATGTTCAAATTCAGCAAAAGATAATGAACCATCATCATCTAAATCCGCCTCTTCTAAAACGTTTTGTATTAAATGATCCATTTCTCTATCATTGAGCTTATTTCCCCCAATCAGTCTTTCAATAACTTGTTTTATATCAGAAGTACCCAACATATCATCACCATCAAAATCAAATATTCTAAAAGCATGTTCAGC…	yes	contig12376	OtL001-A08			12.6127	-0.92536	-2.27797	2	783	Non-Horn
contig12409_b876	TCTCTGTTTGTAWRRGWWRGRTAACATTTGCCGATCACCTATAGCTGAAGCTGTTTTTACCTATTTAGTTAAAAAAAGGAAATTGGAGGAGGCTTGGAGTTGTGATAGCGCGGCTTTAGGGCGATGGCACGAAGGTAAACCACCCGATTATAGGGCGAGGAAGGTTCTATGTAAACACAAAATCCGATATTACGGAGTATCGAGAGTTATTTGTCGGAATGATTACAAAGAATTTGACTTCATATTGGGAATGGACCTAAATAATATATCGCTTTTAAGAGATGAAAAAGGGAATTCGAAAAATTGTAAAGCCCAAATCATGCTTTTGGGGGAATTCGACCCCAACGGAGAAAAAATTATAGAAGACCCTTATTACGACCAGGGAATTGAAGGATTTGA…	yes	contig12409	contig_38	OtP009-E05		8.54432	-2.44547	-2.08391	2	1238	Non-Horn
contig12452_a311	GGGTTGGTAAACTATTGGTCGATKRRGRAAAATGTTGGTTGTCATTTCGAACGAAATAATTAAATATTTAACGGGTATTTACTATTAATAAAAGTGGCCTGCCTCTAGACAATAGCTTAAAATGTTAAAGGATAATATAAACACATTAGCAGAAGATTTAGAAAGACAGGAGCTTGAAGCCCCAAACGGCACCGCTACGTACGAAGTTTACGAACAATTGTTAGCTATTTATTTATGCCAGAACGATTTATGTAATGCTAAGTATTTATGGAAACGAATACCCGATGTGGTAAAATTATGCRAGCCTGAATTAGGACAAATATGGACTGTTGCTCAACATATGTGGCAAAGGGACTTTCCTGCCGTTTATAGAGCATTAACAAGTGTTAAATGGTCGGA…	yes	contig12452	contig_191			9.74438	-2.59173	-2.73922	1	874	Non-Horn
contig12486_a312	ACATAAATACCGTAGTACCTAACGAAGCGGKACTTTAAGTGAATCGTACAAAGACAGTATTTTTTTTCTATATATTTATTTGTATACGTATCTTCTTCGGCCTGTTCAAACGAAAATAGAAACGATGTGTTCATCAAAGAGTGTTATTTTTTGTTGTAGTGTATTTATTCTACTGTTAGTTAACCTTGGAGAATGTAACCTTGAGTTTGCAGAGAAGAATCTCAATTTATTAACAGACGAAACCAAAGTGATACAGTTAATAATAAGAAATTTAACAGATACAAACA	yes	contig12486	OtP019-A02			8.10506	-1.71265	-2.81549	4	287	Non-Horn
contig12513_a313	AAATTTCAATAATGAAATAACATACCAGGTGTTGTTTTTAAAAACCCAACGCGGGTTACTTTAGTAACATCAGAAAACAGAAGAATCGCAAAATAGTCATATCTCAATTACTCATCCGTCTTTGCTTATTCATCGCATTATAACGATGACACATTCGTTATTTAAACTTTTTTTATAATGAGTACTCTAAACGAAAGTATTGTTATAGAGCTGGTACGTGACTAACAACGATAASATTATAAAAATATTCAGCGATTATGGTGAAACTTTCATATTTCTGAATAACAAGCGCTTGTATAAATAGCACGAATATGCGATGTTTTTTAACAGTTTACTCTGGTAGCTGTTCGCATCAGTTGGTGTTTCGGTACAAACGAACATCACAAGCCTTTGTCCTTT…	yes	contig12513	OtP019-F05			12.1041	-0.86601	-1.16223	3	1049	Non-Horn
contig12594_a314	TTTTTTTTAATTTAAAAAATAGTATATTTTAGACAACATTAAATTAAACACACTCCAAACTAGCCGTATTAGCACTTTCTTCAGAATTTTCGATAACCCCCCCAGATTGGTCCTCCCAATTAATCTTAAACCTAGTTACTCGCGGCTCGGAGGCCAAAATATTCCTAACGACTTTATCGAATTGAGGTGGACTCGGTAAATTCTCCCTCAACTCAGGATCGTAATACTCGTTATTTATAAAATAACCAACCCTAATAAACTCTTGTCCTTTATACGAACACGYTAACAAAACAACCGTAACACCAATCGCATCGTTTTCGGGTATCCTTTGCACGTTCGGTGGATCGGCTTGAAACACAAACATGTGTTTTCCCTCAGGAATGGGCCCAACGAAAACCG…	yes	contig12594	contig_242			10.0557	-0.477475	-1.4069	4	665	Non-Horn
contig12626_a315	GATCTGTCATAAGTTGAGATTTCTTCATTGCGGCAAGTTCCGTGGTCGTGTTTCAAAACGGTGTTCGAATTGGGGCCTTTGCCCCCGCGCTCATGCCTAGCTCATGATAACGATGAACGCTCTCGTTGGAGCGCGCGAACGCACGGTTTATTACGAGCTGATTTAGTGTTTCGCGAGTGCCCCAAGGACAGCAAAAGCCGGCAAACTGGCGACCAACAACAGCGACAGCAAATCAAACATGGCTTCGTCCGCCAGGATCGTCCAGTGTAATTCGGCGTGGTTTCAAAAAAAGATCAATCTTAGGCCGCAGCACCGGGGCGTACATCTGGTTACCGAAGAAATCCTTAGACAGATACCGGAATTGTCGCAATTCGCGATGGGACTCTGCCACGTACAGAT…	yes	contig12626	contig_74			8.56339	-3.14633	-2.65083	3	760	Non-Horn
contig12677_a316	GGCCGGGGACCCCACTTTTTCATGTSAAATTAAATGTGTTTTTTAGTTCGTGTAGTCGGTTTGGAGACGTTTTGAAGTGAACACRTGCGAAATGAGAACTTATTCGCAWCGGTTTAGTTAAAAGAGAAGTTTCCSATTAGAAAATCGCATCGTCACTAATTCCTTTTTAAGATTAAATGACTACTTTAACCAGTTTTACGTGACATAAACCCTTTGACTTAATTTTTTAATCATTAATTTCAATTTTCTCGTCACGTAAAGCKTTTTGCACCGAGTGATTTCCCGTTTTTCGACTTGAGATTAATTCGAGATGGCGATTAAAGACTTAAGAAAATTCCTCCAAATCTATTGGAGAGCAATCTTCGTAGTAATTTTCCCCCTAATCCTTCTCCCCGTTTT…	yes	contig12677	contig_393			9.8104	-1.86959	-1.89004	4	735	Non-Horn
contig12743_b877	GATAGCTGTCAAATTAATCTTGCTAAATTTGTTAAAAAAATCATTTTGAAGAAAATAAACCCAAAAATGTTACAAAATCTATTACGTTCTCATACTTTACCAAAAATTACTAGAATGTGGTACTCATCATCTAAAACAGTGTATAATAAACCAATGTCAGGGGGTGCTCCCGAACCTAACCTATCTGGCGTATCCGGATTAAGTAATAGGGTAATTGCATCAAATAATAATCCCGTCGGACCTGGAGCTGCCAAAAGCACCAATTACAAAAACCCGGAATACTTTTTATATAACAGGACGAGCTTTTTCGAGGCTGAAATTGAGATGGCTAAATACCGATGTCCCCAACCTTCAAATAAGGCGAAATCATAAAATGTATTTTGTTAAATTATTGTTTAT…	yes	contig12743	OtP003-H06	OtP011-B04		8.84581	-1.94154	-1.87723	2.5	447	Non-Horn
contig12761_a317	GTTTGTTTGCTATGTTGGCGGCGGTGTCTTTAAGATCTTCTTGTTCTTCTTCTGAGGAGTATTCTAAGCCATCTTGGTTTTGCTCGATTAATTCGCCTTTGTTTTTGCTTACTTTTGATTTTGCCACACCTGTAAAAATAACCAAACTTTTGTTTGAGTTATTATCCGGTTCGGATTTTTTTACATCAAATTTATTAATTTGTCTCACTTCTTCTTGGACACCCCTCATGTATTCATCTAAAGGATCAATTTCTTCCTCCTCCTCTYTTWTCTCATCTTTTTCATCTTTTTCTTTATCATCACTTTTTTCACCTTCTAATTCCACTTTTTCCTCATCTATTTTATCCTCAGATTTTTCAGTAACCCCTTTCTCATCATCCTCTGAGTCATCTTCTAAAG…	yes	contig12761	OtP018-G03			8.39491	-1.97833	-2.30357	3	967	Non-Horn
contig12863_a318	AGTATTTACGGAACTTTGGCTTCCGATAGAATGTCAAAAGAAAAAGTGGAAGATTGGAAAATGAACCGATCACAATCAGGTTCAACGATGACAATAAACACAATCGGAAAATCGAATGACGAAATAAGTATTTACAACGGAGATGAAAACCATAAAGTTTGGGCCGGTTCGCAAGACAACATCGATCAAATTTACGATGTTTACTCTTCATCAACGATAAGCAGGCCATCAAGACCRCGCCAAATCACGGCTCCGGTTACAGTTCCRCCCCCGCCTCCACCCCCATCATCAAAAGAAAAAACAAATTCAAACAAAAAACAACAACGACCAAAAAAATCGAATGTCCAACGGGAATCACCACCAAAAAGARGAACTTTACTCATCGGGATTAATGAACGG…	yes	contig12863	OtP020-F11			8.41683	-1.43251	-2.11369	4	1119	Non-Horn
contig12896_a319	GGGTKGTTCTTACGTTTATAATTGACGCATAACCTAACTTTTCGAACCGCGTTTTTCGATTGCACGTGTTCTCTTAAAAGCTCGGTTAATTTGCTCCTCAGTGAAGCGCATTAACGCCGAGAGGTTGCTTTTGACATTAATTAATCGTTTTTTAACATTCCCGACTTGACACGTTTTCWAAAATGGKTGGAGGAAGTAAATCCAAAAGCGTATCCATTGGCTGATGCCACTCTTACCACGAAGATTTTGAACCTCGTTCAACAAGCGATGAATTATAAACAACTCCGTAAAGGCGCTAACGAAGTCACGAAAACTTTGAATCGGGGAATATCGGAGTTTATTGTAATGGCTGCCGATACAGAACCGTTGGAAATTTTGTTGCATTTACCTTTACTATGT…	yes	contig12896	OtL008-F05			8.85167	-2.55423	-1.12592	3	1121	Non-Horn
contig12954_a321	GAACAAAGGARATAGCCYTCCTTCCTTCCGTTTCTTAACGATTTTCTTACAACCGCTCTGTGGTGGGTTGCTTATCGATTGCGCCTCCTCGCGAGTTTGTGAATCATCACGTATCGGACCGGTCGCGACTGTTAGTCTGAAACCGACCGTATTCCTCAACGCACACGCGAACCAAAATCACACCTGTTGTTTAAGTTACCATTAAAAATTAATTAAAAGTACTTATYASAAAAAAATGTCGCACACCGTAACTGTAACYAGAACAACTACAACAACTACTACCTCAGCAATAATTATCAACACGGGATTTTTAAAGACTTGGCCTGGAGTGTTGAAATTTTTTGAATTGATTTTAGGARTTGTGGTTGTCGGCTTGGTAGCTTACTAYAAGAACACATA…	yes	contig12954	contig_177			9.75425	-2.17282	-2.46638	3	1036	Non-Horn
contig12965_a322	ATATTTACAAACATCTTTTTTCTCTTTTAAGTTCAACGTATACATTTTCAAAAGATAAAAAAAAATAATAAATCTAATCTATCTCAAATACAAGACGTGAATTAAACACAAAATGCTGCCTAAAATAACYAAATTCGATCTCATTTTCTCCCCAGAATTACAACCATCTCTCGTACATGTATAAATACAAGTTCGATACTGCAATTTATCACCAGGTTGTTGCACAAAGTTGCAATAATTACCCAAATCGAGCGACGAACAAAACCGTTTCGTCCCAATTCCTCCTTCGAACCTCCCTGTGTGTTTAACACAGTACCGAGCTCCGTGGACTCCATCGCAAGATTCGGCTAAAATATCGGCGTCTTTGAGGTATTCGTTGCATTGGAATGGGCTGGTTGT…	yes	contig12965	OtL008-E05			10.0575	-1.99379	-2.24543	3	614	Non-Horn
contig12983_a323	GGGAWTYWTTTTGATTATTTGACAGTTGCCGGTTTCGTTATGATAAAATGTTTAGAATATCGTTTAATACGGTAAATTTACTAAATGCGAGTTTAAAATGGTGTAATTTACCCCAAAAAGGGCGAAGAACATTAATACAGTTCGTCCCAAGGTTCACGCAGACAGCCTTTTATTCTAAAGACGCACGCGATGTGAAATCYCCACTTGCAACGTTAATCCAACAACAAAACCARGAACAGAAACAAGAAATTCCACAACCTGATGATACCAAAACGGAGAAACAAAAAAATAAAGAGAAATCATGGCGACACATGAAATACACTTTCATATTTTTTGCTGTTTCATTAACATGTGGTGGCTTTTATTTAATCACAGAATTAGGTAGTCCTAAATATGATG…	yes	contig12983	contig_208			9.89596	-1.78894	-3.113	2	1125	Non-Horn
contig12986_a324	AAGTTGTCTTTATTATATTTTTCTACATTATATTATTTACATTAAATCATTACACCATTGGATACTTTTTCAATAAACTTGTAACTTGCTTATGAGTTAACTTCTTTTCGCCAGGTGCAATGATACCTTTAGCCTCTCTTTCTTTTAATAACCGTTTATCTTCCATACTAGCTACATAACACTTTTTAAAATTTTCAATTTCCTTTGCACACATAGTTTGATTAAACTCTTTATCTTTAAAACAGGCCAACATAATCGACATTTCGTACAGACAACAAACTTCMTTTGCCAGTACTTCCTTTCCCTGATACTTTTGATTTCAACTTTAACGGTAATAGTTCTTGGAAGGGTACATCTTTTTGTATTGTAACATTTCTTGCGTATAAAACTGATAGAAAC…	yes	contig12986	OtL019-F02			9.51411	-1.79494	-0.896742	4	472	Non-Horn
contig13077_a325	GCAGTAAATAATTGTAATTCTCCGTATACTTTCTAGTACGAAAACTTGTGTGGAAAATCTTATTTTAGTACTACTGGTTTTCTCTGTCTGTCGTCCCCGTTGGGAACATGTCAGTCTGATGASAGTGCTTTTCTAGATTCTCATCATGGCTGGCGCGATGTTGTTCGAAAGAGCCCAATCTGTATCTGATTCTAATCGTGAAAAAGATATAATACTGTTAAACAAACTGAAACGCGCAGAGGAGGACGAGGAGAACGATGAGGATATCAAGGCGAAGGAGCAGGATATATTAAACTTGGGCGAAAAATACAAAAAAGAAGGTAAAGCTAAAGAACTTGCCGATTTAATAAAAGCAACAAGACCGTTTCTAAGCTTAATCAGTAAAGCAAAAGCGGCAAA…	yes	contig13077	contig_395			11.4569	-1.60715	-2.28399	3	889	Non-Horn
contig13098_a326	ATTAAAAAGATTTTTTATTTAACAAATATTCTTACACACTATTGAATTGAATGTTTTGGAAAAAAAATGGGAATGTACACTCTGTAAATAATTGAATACAACTATTTTCATTAGATAATCATTAGTTTGGCAATTTAGGTTTTCATTTTGAGTAAATTCTAGATCCATAACCGACACATTACCACATACAAAAAAGCAAAGAAAAAGATAATAAAGAAAAACAACATTAAAAATTAAAAAAGAAGATRCATGCTCTATAYGCTTCTATAAGACTTTCATGAAGATCAAAAATTGTATAAATTAGAAGAAAAATAATAATAGAAMCACTTTTTTTAGTTTTCATTCTTAAATTTTATGTTTCTCATTTAATTGTACTTTGGACTTTTTCATACAACCAAT…	yes	contig13098	contig_257			11.1134	-3.82276	-2.59069	4	1091	Non-Horn
contig13208_a327	GACAGAAGGKGGCGTTAATCAGAATCGGTAAGCCATGTTGTGTTTTCCAATAATTTCTCTTAACGCGATTTCTCCTTGCAATAATCCACTAGAATTCTAATAACTTACTCACAAATAGTGTTGTAGTGTTTTGGTATAAGTGTATTGTTAATTGGGCATGTGTATAAATGGCGGAMTACGGAACTTCTTTTCGCCGAACCAGTAGCGGTAGCAACAGGGAAGATCCGAGGTTAACGCGAAGGGACAGCAGCAGCGCGACGAAAGAGTCTTCGCCGGAAAAAACGCAATCAAACTGGCAAAGTCATTATTCTACGATGCAAACATCGTATCAACATTTACAAGGAACCATGTACAGCGATCCTAACCAATACCCAACGCCGGGTTATCAAAGCGCGTACG…	yes	contig13208	OtP003-G10			10.1766	-1.75376	-2.5752	1	703	Non-Horn
contig13223_a328	GGAAATGCATTAACACAACACATGTCTTTTATGTCTCTTCAATTTTCTTCCTGATTATCTTGAATCAATAATGATCGATTACAAAAAATTACCCAGAAATCACAAATAATTGTACAACAGATAGGAAGTAAATAGTCGAAATCAAAAGTAATAACCAAAAATTGCGTAATTGTAACAGCTTAACAAGCTCACTGGTACAGAAACAAACGGTAGCACACGCTTGGTAAGTTGCAGGGAGGCGAAAGCGTTAGCTTACACTTTCTATAAAAAGCCGTTATACCCGCATCGGAGCATCCAGTTGAGTTGTTCTCCACATACGATGACGAAGTTGCTGAAAAACCTTACGATTCTTCTTTTGGCAATTGCCGTGGTTTCTGCTGAAAATAATCAACAAGAACC…	yes	contig13223	OtL013-A08			9.47863	-0.794368	-1.51026	4	1378	Non-Horn
contig13230_a329	GACACTCAATCTAAAACTTTTAATCGTTCAACATGGTCTTCAAATTCGTCGTTTTCTTCGCTGCTTTGGCTGCAGTCCAAGCAGGAAATTTGCTGCAACCAGCCGTTTATTCWTCTCCTTTGGCATATTCAGCACCCGTTGTTACTAAAGCCATCGCACCAGCAACTTCTTACACCACCACCAGTACTTACACCACCCACGGATCTCCRGTTTATGCAAAATCTTACGCCGCTCCCGTTGCTTATAGTGCACCAATCGCCCATGCTCCAGTAGCACCCGTTACTTATARTGCACCRATAGCTCATGCTCCAGTACCAGCTGTTGCTTATAGCGCACCGATTGCTCATGCCCCAATTGCTTACAGTGCTCCAATAGCACACGCTCCAGTTTCTCCTGTAG…	yes	contig13230	OtL014-H05			9.062	-0.593535	-0.560294	3	616	Horn
contig13304_a330	GTTCAGTTCAAGACAGGAAGAGGTGTGTTCAACAGTTTGTGCGTTAACTTGAAAAAATATTAATTAATTTTTATTAAATTAAAAAAACTTTTTCTTGTGTAATCAAACAAAATGAAACATTTTGGGTTAATAATCCTTTTAAGTTTATTAGGTATTATATCTAGCCAACAACAAGAAGATGCGTGTAAAGCAAAATCACGTGTAGTTCCTGATTTAACATATTGTGACCGATATTGGGAATGTGTAAACGGTCAACCAGAACTTTATGATTGCCCGAATGGTTTAGTATATGCAGGAAAGAATCGYGGTGTTACTGAAGGATGTGATTATCCATGGAGAGCAAATTATTGCGATGGAAAACAACAAGCCAATCCTCCAATCGGCACGGATCATTGTGAT…	yes	contig13304	OtL008-E04			9.32665	-1.06994	-1.54685	4	764	Non-Horn
contig13306_a331	GATAGAGAGCGGCTCTGTATTGTACACGCAAATACCAACAACCGCCTAACAGACTGATAAGGGAAGACGTGAGTGGATGAAGGTGCTATGTAACACGGGAACAATTTTGAGTTATTCGCGTTTAAAGTTTTTGTTTGGAACTTTTTACTATTTATTTCTTTTATTTCGTTTTTCATATTATATATTCAATTTATTTCAACAACAAAATATATTACAGTATAATAACTTTACAAAATGAAGATAAGTTAAGGAATTACAAGAATGAAAGATGTCATCTAAAGTATTTTATTATCGCGTAAAATATTTTAGTAATAATATTTGTATTCATCATGTACAAATTGCAACTGTTGTTTCAAATTCAGTAACTTTTCTTTAGAAATATTGCCATATTTTTCCGAA…	yes	contig13306	OtP004-C03			9.38137	-1.08367	-1.71613	2	492	Non-Horn
contig13342_a332	CSACTTGCAGTTCGGTGCGCGATCCGTTCACAAGCATTGTACCATACCCTAACTAAGAAAGTACTTTTAAGTTACTACTAGTAAAAAAAAGAAACAAGATGTCTCTCGCCGATCCAATTGCTTTCATGAAGGATTTCCTCGCCGGAGGAATTTYCGCAGCCATTTCCAAAACCGCTGTAGCCCCAATTGAAAGAGTAAAACTTTTACTTCAAGTACAACACATCTCTAAACAAATCTCAGAAGCTCAACGTTACAAGGGTATGGTCGATTGCTTCGTACGTATTCCAAAAGAACAAGGTGTATTAGCTTACTGGCGTGGTAATTTGGCCAACGTAATCCGTTATTTCCCAACCCAAGCCCTTAACTTCGCCTTCAAGGACAAATACAAGCAAATTTTCT…	yes	contig13342	contig_391			12.8966	-1.29781	-2.0924	3	1841	Non-Horn
contig13345_b878	CGGCCGGNGGTAGTCACCAAAAATCCTTTACGGAATCAAGTAACAATAATCATTGGTTAACTTTTAATAAACATGGTGTTCAAGTTTGTTGCATTCACTACTCTTTTGGCTTTTGCCAACGCTGGAGTTCCTCTTGGTCTCCACGGATATGCCGCACCGGTAGCAACATACAGTGCAGCACCAGCAGTGTCTCATGCGTACATCTCAACTCCAGCTGTTGCTAAAGTAGCAGCTCCAGTTGCGTACTCTGCTCCAGCTTACTCCACCTATGCTGCCCCAATTGCTAAAGTTGCGTACTCTGCTCCAGCTTACTCCACATACGCCGCTCCGATTGCTAAAGTTGCCTACTCTGCCCCAACTTACTCCACATACGCCGCTCCATCTTACTCTTATGCCGCC…	yes	contig13345	contig_133	OtL015-A10		10.93	0.00473025	-0.640558	3.5	945	Horn
contig13405_a333	GGTTTTTCAATCTGTCATTTGGTAAAATTGCAATTTCGCCTCCCAGATTTTGTTCAAACGCTAATCTAAAAATAGATGCATTTTTAATATTTAATGTGAAAAGGATATGGCATCAGCACTAGAACAATTCGTTAATACCGTTAGGAATCTTTCTTCGCAAGGAAATTATCGAGAACTTTGCGAATATTTATCAAAATCGAATGAATCTTTATTAAAACATGGGCCCCATTTGGATAACGTTCTTGAAACTTTAGATTTACAACAGCATTCTCTTGGRTTTTTGGCTGTGTTGAATGCAAAGTTTAATTTGTCTTGTACGGGGGCTACTCAAGAGARCAAATTTAATCAGGCTCAAGATTTTATTAATGGTTGTAATGGGGAACAAATTCGATTAGCGCC…	yes	contig13405	OtP007-F02			10.1706	-2.62651	-2.85123	1	709	Non-Horn
contig13450_a334	AAATGGTTAGTATTATTTAATCTATTTTATCATCATCATCTTTATATTATTATTAAAAACGTTAAATTCACACATAACACTTCATTTTATATAAACCATACTTTAATTGAGAAAATCTTTTAAKCKTTTSRYGWWRWRYYKYTMSRYTKWMRMAATGACTGAAGGAACCGCAACGATTCATACACGCAAATTTATGACCAACAGATTGTTGTGTCGAAAGCAAATGGTAGTGGATGTGCTCCATCCTGGACAACCATCAGTTAAAAAATTAAATATTCGTGAAAAATTAGCAAAAATTTATAAGACMACATCAGAWTTAAGTATTCGTTTTTGGATTCAAAACAAACTTTGGTGGTGGTAAATCGACGGGTTTCGCCTTAATTTACGATACGTTAGATT…	yes	contig13450	OtL003-E07			11.6418	-1.90247	-1.67999	3	655	Non-Horn
contig13485_a335	GTAAACTGAAGTTAGCTGCTTCAAGTGACATTTACGTCCTGTGACAGGTTAGAAATTTCCGCTTCCTTTTCGTTGACGCCGCAGCCATGAAAGCCAAAGGAGAGTTGAAAGAGTTCGAAGTAATCGGGCGTAAACTGCCCACCGAAAAAGAAAAGGAAACCCCATTGTAYRRMMKGRGGATTTTCGCCCCTGATCCAATTGTTGCCAAATCTCGCTTTTGGTACTTCTTAAGACAGCTTAAAAAGTTTAAGAAATCAACAGGGGAGATTGTTTCAGTACGTCCTATTCCTGAGAAGACCCCAATTAAGATTAAGAACTTTGGTATTTGGTTGAGGTATGATTCTAGGTCGGGTACTCACAACATGTACCGTGAATATCGTGACTTAAGCGTTTCGGCCG…	yes	contig13485	OtL015-C05			12.7924	-1.60013	-1.69331	3	663	Non-Horn
contig13513_a336	AAAATCGCGGCAACCAGCGACCAAAAAACTCCAACCCAAGCCAAAACATAACTCCAATCATAATTGGCCCTCGCATTTTCCTTTAGAACCGGATTCCATTCCTGGTAAAATTCTTCTCCGACGACTTTTTCTTTCTCAAAATATTCTACTCCATGCCATAAACCCATCGCGCCTGCGCTCAACAGACACGCAAAAGCATCAAAATAGCGGTTGCGGTAACATTTCCGGGCGATCTTCGCCAACATCCGGCGACCCCAGTACAAAAAGCAGCAAAAACCGACAGAAAACTGATTATAAATAGGGCGATCATCGAACGACCCATATGTAATTTTGTCCATGCATCATCCGTTAATCCACTCGTTTCGTTATTTTCATCCGGAATATAATAATTGATGTTAT…	yes	contig13513	contig_34			10.7802	-1.17914	-1.81481	4	954	Non-Horn
contig13541_a337	GAGCTCTAGCAGCATCGCAAGTTTGATTCGGATGCCATTCGGCTTTGCAATGATAACAAAAGTACGAGTTGCAGCCTGGACGTTCGCATTTTAACTTCGGGCAACTAGCGCACTCGCTTGCTATCACCGCAAAACTACAATCAGGGGCGGGACACCACCTTGTATCTGGATCGACGGCGAGCACCCGACGTACCATGAAGTCTTCGTATTTCGCGAAGAGGGCTTCATCGTTTACTATAGTTCGAATTTCATTYGGATGTAGACTCTCAGAACATTCCGGGCAAGTCATACAAACTCTGGACTCTGTTATTTGAACCCTAAGGTATTGCTGAAGGCAGGATATGCAAGCTTTATGTCCACATTGTGTGACTTCGAAGAAATCAGTCGATGGGAGAACAA…	yes	contig13541	OtP018-G09			9.80802	-2.41941	-1.3573	3	787	Non-Horn
contig13557_a338	CGGCCAGGGAACCTCAATAATACGTTGTCAATATATTCTCTATTTTTCAGTTTGTAAAACATGTGGAGATACATACTTCCAATTGGATTTCTCTTAATTATAACATGCGAAAATGCCAATGGACGAGATATCTATTGGCGTGAGTACAATATTGACGTTCCAATTGACGCCGTACCCGCTGGACAYGGTTTATATGTTGGTCAAAGTATTCTTGATGGTATTTTAACTCCGGGAACAATATATCCGACAGCTGCCAAGTTTGTTACAGAACATTATGGAAAAAAGGAAAAAACCAATGACATAAAAATAWTGTGCTCTCAAAATCCATTACGATTTAAGTGGGAATACATAGATGTGAGTAATATYCCGAAAAATTTAGTACAYAGATTAGTAGAAGGA…	yes	contig13557	OtP016-F07			9.59689	-0.506322	-0.985204	3	719	Non-Horn
contig13570_a339	GGACATAAAGCTAATTTAAACATCAACTTGACATACCTCAACTTACTTTTAAAGTTTTTACGTAAATTTTTCAATGAATTTAATGTAATTTATATAATATACATTACGCCTACATCTARTTAATGCCCTAAAACTCATCTCGACCACTTGGAGTTGTATTTTCTGTGATTTTTYCGAGAAATAATACCCAAGAATGACGTGGACATAGATAAGTAAGGTTATGTACTTRCCAAACTAGAATACTTTTCCTTGTTAATCTCTCGCAACCAGCAAAAATGTTTTACGATATAACAGACACGCAAAAAATTGGTGTTGGGTTGGCAGGTTTTGGGATGTTTTTCATATTCCTTGGGGTGTTGTTGATATTTGATAAAAGTTTACTGGCGTTGGGCAACATAT…	yes	contig13570	OtL009-C06			11.1787	-0.101703	-0.431992	4	1006	Horn
contig13612_a340	GCGGGGRGAGATCGTCAACGACGTAAAATTGAACAGGTTATCTTTATCTAAATAAAGTAAACGAAACATATTTTGAACGTCATATCGATAAAATTCGAATTTGCAAGTCATCGAATTCACGGCAGTAGTCGTCCTATTTCGACGTTGGTTCCACGAAACGTTAAAAAACTACCGGAAAAATGGTTCTTTCCAAACCCCTTTTTAATTTTACCATGTGGTATTTTAACAATTTATTTAACCATCCTGTATTAACAAAAGCTATAACGAGCTGTATTGTTGCAACAAGTGGAAAACTTGTAAGTGAATTAATTGAAGGAAAGAAAACTATTAATCAAAAAGGTGTTTTTGCTTATGCACTATTTGGGTTATTATTTGGTGGAACATGTCCCCATTATTTTT…	yes	contig13612	OtP005-D12			9.23516	-2.48979	-2.30597	3	953	Non-Horn
contig13646_a341	AATAAATTTAAAGTGAAAATTAATATAATCAAAATAAATGGACGAAGAGGAGCGAAATGTTTTAATGGTGCTTATTAATAGCCGTAAAAATAAAATTTGAAACGATGAGGGTTTTGGAACCGAAAATCGGAACGTACCCGAACGTCGTGTATGTTGACAGATGTKGAATGACAGCGAGATCGTCCAGAAACACTGCAAAAACGAACTCCTTTGGCCGTTCTAAGAGCCTTCACGGCGTAAAAACCGCGTTCGAGAAAGGATTAGTCGYGGTAGATTTATTAGTTAAACACAATGATAAAACTGTTTTCGCTAAAGCAACAGAAGAAAGATGGGGAGGCTTCTCCTCGAGGGGGCAACCAAAAAAAACCTTCAGCAGCCCAATTACGTATCGCTAAAGAT…	yes	contig13646	contig_233			10.6777	-2.33857	-2.50572	3	1019	Non-Horn
contig13655_a342	GGTCTTCGTAAGGTTAACATCAACTGTCGTTTAGTTTTTCGTCGGTTTGTGTTTCGTTTTTACATTCTACAAACACCAGGAAGTATTTTATTAAGATGATTTACTTTCTTGTAGCTTTCATCGTAATTCTATTAGGATTTTATTGGAAGAAGCCCAAAAATACTCCYCCAGGWCCCTTTGGATTACCAATCGTTGGATATTTACCKTGGTTAGATCCAGTAAATCCCCACTTAACTTTAACACAACTCAGCAAAAAATTCGGCAGCGTTTATGGGTTGTTTTTAGGATCGGTTTATACAGTGGTTGTTTCTGATCATAAAATAATAAGGAAGTTATTCGCTAAAGAAGCTACAATTGGAAGAGCACCTCTCTATTTAACCCATGGARTTATGAAAGGAT…	yes	contig13655	OtL017-C07			10.0331	-1.8432	-2.55337	0	1321	Non-Horn
contig13702_a343	TATTTGGTAATGTTTAAAATTTGGGTAAAACGATGCATTCTTTTTTACTATAGATCCTCCATTAAACTTCACCAGTGCTTGAAGTATATTAAAAGTGATGCACCACACAACATTAAGATATTTGGCGATASMWMWMMTRAKSCACTAAGRAWMWWGWAAWMRWYWKAYAAGATGCCTATTATTCCGCATCCAACTCGTGAACCTGCRGAACCAGTGGTGTGCGATYCATCGGTATCTTGCAATCCAAGATCATCTTCCCCAGAATGGACCACAACAGCTCGTCCCAAAATTCCAGTTTCACCAGTCAAACAAATGATTTTATCGGTAATATCTACGGTGGCAATTCCATTTGCGCCCGCTTCAATATTTCCTAAATCACCAACGTGACGATGTTCAGCG…	yes	contig13702	OtL019-B05			11.4157	-0.529644	-1.16648	3	857	Non-Horn
contig13741_a344	GGATTGTCTCGARGATGGCGACACCGTTCGAGTAAATATGGCCAACTATGCCGTGGACGGTGAAGACAATAAACAGGCCTTTTTCAAAAACGGTAACAAGCAGTGGGTGAAATTAAACGTCGGGGGCACTTATTTTTTAACTACGAAGACTACGCTAGCTCGAGATCCCAACTCGTTCTTGTATAGATTAGTTCAAGAAGGACAGCGACCTCATATCAGACAAGGATGATACCGGGGCGTATTTAATAGACCGTGACCCGAGTTATTTTTCCCCGGTGCTCAATTACCTTCGCCAYGGTAAACTAGTCATAAATAAAGGTCTTGCGGAAGAGGGTGTTCTTGAAGAAGCGGAATTTTATAACGTAGCCGAATTAATAACTCTCGTTAAAGATCGTATTT…	yes	contig13741	OtL006-C03			10.9423	-2.49017	-2.51202	0	1005	Non-Horn
contig13743_a345	ACGTTAAATACACTTTATTTCATAAAATAACATAGGCACTGATAAAAGAGAGAATAAGAAAAAGATTCACAAACAAACAATTTGATAATATAGCTTCTTTTGAATAGATATAGATAATTCTTTCATTTTCTCTATCTAAAAGGAATGTAAGTGGCTAAATTGAACAGCTCAAAGCGACTGAAAGGAAGTCCTCGAATCCTAAGGTAATCATGCCTTTCCTTTCATTATCTCGCTTGTCTAAATGCTTCTGTAAACCTTTGAATTTGAACGCACGCCACAATAAATTGGTCAACTGACATTTGCTTGTGTGCTTCTAAATCACTTTTATGAATGAGAAATTGAATGAAATTTGGTGAGAATCGAAATCCCATTTGTTGAAATGCATTTGCTAATTCATGT…	yes	contig13743	OtL016-B10			11.1683	-2.01125	-2.69463	0	881	Non-Horn
contig13849_a347	CAATTTCGGCAACCGAAGCTCCAAACATGCAACAAATCGATTTAATGTCACTTTCTATCCAACAATTGCAAACGTTAAAGTCTCAATTGGATGCGGAAATTAACTTCTTCACGGAATCAGTCGGACAGTTAAAAACAACCTTGAACAAATTTCACACATCAAAAGAAYGTTTGGATACAATAAACCCAAATATGAATGATCGAAATGTTTTAGTGCCGTTAACTAGTTCGTTATATGTACCAGGGAAGTTAGTTAATTGTGACGAAGTTATGATTGATATTGGAACGAGATATTATGTTAAAATGGCTAGTGGCCAAGCCRCGGATTATTTTGTTAGAAAAATAGATTTCGTTACTAAGCAAAACGGCAAAATTCAGCAACTTTCGAAAGAAAAACAAG…	yes	contig13849	OtP008-E08			9.64401	-1.77665	-2.444	3	629	Non-Horn
contig13871_a348	AGAGGGGACGACTYTAGCGATTTAGCGCCGAATCAACGATTAAAAAAGCTTCGACAACGCGTTCGAGAGCTTCAAACGAAAATTCAACAGGAAACGTTCGCCCGCGACGGTCTTTTAAAAATGAAAAGTGTTTACGAAGCGAACCCAGCGCTGGGAAATCCGATGACAGTTGAAGGTCAATTGAATGAAAGCAGTCATAAATTAGAAAAACTCCAGCRGGATCTGAAGAGGTATATGGACTACTTGGATGAAGCGCAAAGAAATTCGACTCAAATCCAGAACTCGCACTCGCAAACGAACTCCCCTCGATTGGTGAACGGACGAAATCATCGGAATTCAGGGGGAAGTGCTGCGGAAGAGGAATCTTTAAGCAGGTCTGCTAGCGATAGCAGCGTTACT…	yes	contig13871	OtP009-H07			10.4787	-1.51351	-1.69215	3	458	Non-Horn
contig13956_a350	AGATCGACATCGATACCCCATAAAGGTGGAAGTAGCATTCCTCTTCCTGGATCAGCGTTGCCATCGAGAAAATGTCCACCAGACAAAGTTCGCCCTGTTGCAAGTTCGAGCAGGGCTTCAAGTCCAGCTCTTTCTATGATTCCTCGAGGTCCTCCCGCTCCAAACAACAGTCCCTATCAACAACCCAAAAATCAACAACAACAACACTCTCTCTTAAAACTTTTCAAATCCCCAACGAACGAACGAACCACTCCGACGAGTAACGGGAAAAGAACAAGTAGTTCCAGTGGGGTTTCTTCCGCGAGGAGTGAAAAATCAGACAGCAGCACAAGTATAGAACCGAATATTGATTTGAAAACGAATAGGAATAATCCGAAAGTGAAGCAACAACGAGGGGTG…	yes	contig13956	OtP002-E07			9.20365	-1.6454	-2.48363	3	1229	Non-Horn
contig13962_a351	GGACACCATCGCATTACGAGATGTCGAAAACGTCGATATCGATATACATTTGTTGGAGAAGTTGCAAAAAATTTTAGGATTTGCAACTAAATATGAATTATGGAGTAAATTTTGTGGGAATTTATTAGATGAGATCAAAAAAGATCCTAAAGTGTGGACTGTTGTGACTGCGGAAAGATGTATTTTTGAAATTATTTTGTTAGAATCAGAGGAAGCATTCGGGGAAAATTTAAAATTAATCGGAGACATTTTAATCGATGCTTTACACCTCGATTCGGATGTTGAGTCGCGCTTAAAAACATTTGTTGCTTTAACAAAAGCGATGGATTCAAAAAACATTATTTTTAAACATTCCWAAGACGATCTTAATTCGTTTTTAGAGGTTTTAGTTATCGAGGT…	yes	contig13962	OtL007-A07			8.39382	-2.53626	-1.87113	3	969	Non-Horn
contig14005_a352	CTTTTATAACTTATTTATTAACTCAGAAGATAAAAAAACATTACTTAGACCATCCTTYTAAGTAACTCATTAATTTTGTCTTCCCTGTTACCAAAATCACCACCCTCAACATAGTGATTTGTCTTCTTGCGCCATCCTCCAGTAGGTGTATTAAGCTTGAATGGCCAGAGGAAGTTAGAAGCATACTTGAACTTTGGTCCAACAGTAAAGATTTCATGAATCAAATCTTCAACACAAATGATGTTCGAAGCACCCAATTTATCTTCAATAATTTGATTGCTAGTGATTGGAATACGATGTCCCTTCACTTTCCCAAAACCACGTTTGTAAATCAATTCTCTAACTGATTTCAAATTAGGGTAACCCCAAGTTATGTAAGGTTCGCAAATACGAAGCATG…	yes	contig14005	contig_31			12.9142	-2.05339	-2.59729	4	830	Non-Horn
contig14109_a353	GAGGTTAACTAAACKAGATGGCGATAGATCTTTTGTTTTTTATTACATGGCAACAGTATTAATTTAATGATGATGATTAAATAATTTTTGATCGCAACATTTAAGTTAGAGTGAGAGATGATTAAAAGGTTTAAAAGAGTGAAAATGTTTAATGTACGAACAATTTACGTGAAGATTTTATTTAATTTAACAGTTTTTCTCAGTTTGCTGTTGGTGTTTTTATGTACATTCACAATTCTCGATGGGGTTCGAATTAAAGAAACGCATTCCTCCGATACCCAGCGTCTTCACAATTCGTGGAACGATACCATTAAAAATGAATCGAAAATAATACAACCCGACGATGATTTCAACGTGTGGTTGATTTTTACTAAAGTTATCGATAAATCACCGTTAATG…	yes	contig14109	OtL018-G02			9.46334	-2.26438	-2.27616	3	972	Non-Horn
contig14153_a354	GACACCAAACATCCTAACCTTAAAAACTKAACGTTTGCAAAGTCATTACTTGTCATTATTATTACAAATCAAAAACCRAAGAAGTCGAAATGGAGTGTATAATTGGAATTAAATTTAAAGACTTCGTGATGATCGCGACCGATATGACCACCGCTCACAGCATTATGGTTATGAAGTCCGACGAAAATAAGCTTTTTCCGTTATCAAAAAAGCTTGTTATGGCAATTGTTGGTGAAAAAGGTGATACAACTCAATTTGCTGAATATATCGCGAAAAATATTCAATTATACAAAATGAGGAATGGTTATGAATTAAGTCCTAGCGCCGCAGCAAACTTTACTCGAAGAAATTTAGCTGAAGCTTTAAGGAGTAGAAGTGCATATCAAGTTAATTTGATGT…	yes	contig14153	contig_412			10.6425	-3.15044	-2.64801	4	767	Non-Horn
contig14156_b879	GACTTTAGAACGTGTCCACSATTATTAATCACGTTGTTTCATCATAAACCGGCTCGTTTCATTTTAATCCAATTTAGCCCTTTTCGAAGATGGCACAAAGCAAATTGAACGATTTGGCCGGAAAATTCGGCAAGGGGGGCCCACCGGGGTTAAATTTGGGGTTGAAACTTTTAGCGTTCGGCGCCGCAACCGCTTATGGAGTCTCGCAATCGATGTATACAGTCGAAGGTGGACACCGATCGATTATGTTTAATAGAATAGGAGGAGTCCAAAATGAAATTTACACCGAAGGATTACACTTTCGAATCCCTTGGTTTCAATACCCCATTATTTATGACATCCGATCTCGCCCAAGGAAACTCGCATCCCCTACAGGCTCAAAAGATCTCCAAATGGTTA…	yes	contig14156	contig_387	OtL019-A03		10.9405	-1.99408	-2.39641	3	948	Non-Horn
contig14235_a355	GAAAATGTCAAATTAAATATAGGTTATGTTGCCACAAACAATTTTTCATATTGAATTAATTTGCTTAAAACCTTACTAAAAAATACGATTAAAGCTCTCATATAACTATAAGTCTTTAAAGTAATAATGGATGATGGTCCCCCAAAAAGGGGTCGAGGTCGTGGTCGTGGAGCTCGCGGAAGAGGAAGAGGTCGAGGTAGAGGAAGAGGACGGGRAAAAAAAGCGATAAAGGTAATTGAAAGCGATGATGAGTCGGAAAGTGTTCTTCAAGATTCAACYGAAGAGCAAACAACTCAACAGGAAGAGAATCCCGTCGAAAATAATGAAAATGATGCCCCAAAAATTGATTTGGARGCTGATATTTCTCAATTGGAAGCCCCCACATTTACTACGATTAAT…	yes	contig14235	OtL009-E05			10.3367	-2.51694	-2.35003	1	1016	Non-Horn
contig14259_a356	AGATACCAACAATGATGAACTAGTTTCCACCGATTTAATGTTAAAATCAACAGCGAATTTCTCAGAAATCATTGAAAACTTAAAACATCCCCAAAGTGGACTTATTTTAAATCATCCAAATTTACCCCAAAATACATTTATTRCTTCGGATGCTGTAAATTGGTTGATGAATCACATGGAGGGTGTAACAACTTTAGATCAATCAGTTCAAATTTTTATAAATCTCCAACGTGAGCGATTTAWTTGKCCACGCTTCTGGTGAACCAACAAAACCATTTCTTTACGGTTTYTATTTATATTTAATTCAACAAACCGGAAAATCATCGATTGATGAAAGAGACGGGGACTCACCGTGTTATGATATTCAAAGTTTTGAAAACGAATGGATGGAAGTTGAAG…	yes	contig14259	contig_162			9.21464	-2.17674	-1.66445	2	1065	Non-Horn
contig14261_a357	AGTAATACTTAAACCTTACTATTTATTGAATTCAAAATGAAATATTATAAAATATAGTCATAAATAATGTATAAAAAATCACTTTTTTTAATTTAAGCTTTCAAAGCTTCCTGTAATTTCTTCCTAGCAGCGAGAACTCTTTCTTCCTGCCTCTTAATATCATCCTCAGAAATGTTTACAGCTTGCACTAAAGGCTGTTTAGGGTCCAAAAAGACACCCGGATTCTTATCTAACGACGTTTTAGACCCCATTTGTCCAGTAACAGGTTGACTTGAAACATGTAAAGCAGTCGCGACACTTTGAATAATAGTTTCCTCCATTACGTGTGGCCCCACCGGTTTAATTCCTTTCGGGAGTTCCATTCCTTCRTACTCGGTYCCATCGCAATCACAAGCTCTT…	yes	contig14261	OtL002-D05			11.3083	-2.32468	-2.73576	3	796	Non-Horn
contig14387_a358	GGGGAGTGCCGCGCACGSGCATTAAACTCGATGCGCAATTAATTATTTTGTTGATAACATTCAAATATTATTTAACAATCCTTTTTTAAATTTTTAAAATAAAAGTAACGTCGATGTGTTTGAAATTTTGGAACGAATTCGATTAAAAAAAATTGATTTTTGCTTTGTTTTAAATGGTTTAGACCTTTTCGGGACTACCAAGCCCTTTTTTTACCTGTAAAAGAATTATGGCGAGTTGTGTTGTGAAAATCGAGTAGAGTTAGAGGATTAAAACAGTTTAAGATGACGAAAATTATTAAAATCTTTCATTTTCTTTTAATTTTATCAACTCTACTTATCACTTCAGCTGAATGCAAAACTAAGGCTTTAGAAAATAATGTACAATCATTCGCTCAAGGG…	yes	contig14387	OtL009-B03			11.098	-0.451327	-1.38554	4	550	Non-Horn
contig14493_a359	GCGGTTGCATCGCCGTTTGCCACCGCGGGCGGTGCTGCTGCTGCTGCTTCCGCAGCAGGAGCGGCAGATTCTTCTACCGGTTTCTTTTCAACTTCTTTTGGAGCATCTCCGGATGGAGTTGTGGCGGTTGTATCTGCTGCGTCTTCCGTAACTTCTTCGACTTCACCGTTCTTCTCCTTATCCTTGGTCGGTTTAGATTTGTCCTTCTTCGAAAATGATATGCTTCTCAACGACCACTTCTTCTTCTTTTTCGTTTTTTCCTTGCTTTTTTCTGTGGCGGTTTCTTCGGCTGATTTTTCATCGRCTGTTGCGGCTTTTTCGGGAGTGGTGGGTGTTTCTATGTCTTTTTTATCCCTGTCGCCACCACCTTCCGTGTCCGGCGTTTGGGCCTCTTCCGTT…	yes	contig14493	contig_441			12.9297	-1.97595	-1.4415	4	754	Non-Horn
contig14509_a360	GGACAGTCAGTTATAAAAAGTGCGAGTGAAAACGTCCAAATTAAAATGAAGATTCTCCTTTTAATCACTTTCATCTCCGCCTTCGCTTTGGCCCAAGAAACCAAAGAAGCCGAAGCCCCCAAAACTTACAAACGATTAATCCCCGCCGATGTTTTAAGAGATTTCCCTGGGATGTGTTTTGCAAGTACTAAATGCGCCACCGTTGAGCCGGGTAAAAATTGGGATTTATTCCCGTTCTGCGGCCGATCAACTTGCGTTTTAAGCGARGATCAACCACCAAGATTATTGGAATTGGTCGAAGATTGTGGGCCTTTACCTTTAGCGAATCCGAAATGTAAATTGGATGAAGAAAAAACCAATAAAACGGCTCCATTCCCCGGATGTTGTCCGAAATTTGCT…	yes	contig14509	OtL015-A12			11.9924	-2.69409	-1.46697	3	1259	Non-Horn
contig14511_a361	TCGTGCCTGATGAAGAGATTTTGAATCTCGAAACATGTTGCACTGATCTTATATTAAGAATAAATAATTTTTCATCGTTCCCAAGCTTTTATTTATCACTTACAACCCACGATGAACATTGAGTCAACTATCACCAAACTTAACATTCAAACCAATCTTGACTGAACATGGACAATTCCATTACCTACTGCATACCATAGATGTCAAAAATTCAAAAGAYGCTGTACATGAAACTTTCGTTAATAATATAGTTATTATGGTAAAAGACTCAACTCAAATGTAGAAACTTTAAGTGGCATTTGGTTGTATTATTAAAAATTCTTTATAAATC	yes	contig14511	OtL013-F11			9.88731	-1.25435	-0.540149	4	331	Non-Horn
contig14535_a362	AAATAAATTACTTGTTAGTTTTATTCATAATAATATTCATTAAATCTAATTTAGCAAGTTTAGGAACATTACGAATAGTCAAAGAAACTCTAGTTTCGCGTTTTAATTTTTGTCCGACACTAAAAATCTCGCCACATTTTTTTAAATTCACAACTTCCTCGGTAATAACATCCTCTTCGACTTCATTGATACAATGTAAATATTTCCCGTACATTTCACCTTGTAATATCACCAAACTATAACGTTCTAACAATAACGAACAAATTGGAATTCTAGAGCCATAATAATCATCTAAAAACTCCAAAATAACCATGGGATCCACAAGTTATCGTAGTTATCGTTGGGTAAAAAAGAGATCCATCTAAATGGGGCATAATCCCCTGACCAGGTAAGTATTCG…	yes	contig14535	OtL019-B12			8.59243	-2.13487	-2.02342	3	740	Non-Horn
contig14617_a363	GRGAGTATTCAATGAACTTCAAAACCGTAAAGTCAACCGATTATTAAACGAACGAAAACAACTCGAAAAATTGCGAAAAATGGAAGATAAACCGGTCGAGATGGAAAATCAAGATAGTTTTCTTATGGAAATCGTGTCGGACATTATTTATAGTCCGGTCAATTTGATTTTAGTATCGCTAATAGCATTGTTAGCCTACAAAATAATTCAARGGTAACAGACCGACTCCGCCACCTCCTCAACAACAATTACCGAAATTGCGACGAGATTTTACCGTGGAAGAGCTCAAAAAATACGACGGAAACCAACCGGATGGTAGAGTACTTGTTGCTGTAAATGGTAATGTTTTTGATGTAACRAGAGGAAAAAGATTTTATGGACCAGGCGGTCCTTACGCTC…	yes	contig14617	OtL004-B08			10.7107	-2.19885	-2.0048	4	1122	Non-Horn
contig14664_a364	CAGATTATGACAAATTTATTAAAACAAAACACAATTTTGTTTTTTCTTTTAAACAATATTTTAAATAATAATTAAATTAAATTCTTGGATCTTCATTAGTTAATTTAACCAATTTTTCGGATTCCTCCCAAATCTTTTTCGCTTTTCCCATATCCATAGCGGCCGCGGAGAGCCCCCTTTCCTTACAATCCATAAAATACTTCCCGTTTACACCTTCAACTTCTTCGGAGGCAGCGAGAAAAACGGAAGTTTGACATCCTTGAACTGGAGTTTTAAAAAATCCTTTCACAATCAACATCATGCCCCAATTTAATGGAATTGGGACGTTTCTCCATATCCCTGAATCAATCATTCCCGGGTGTAAACAATTCGCTGTTACGTTCGTTCCCTCCAATCTTC…	yes	contig14664	OtP012-D10			11.1318	-2.26748	-1.53898	4	603	Non-Horn
contig14674_a365	GACGCCGATTAAGAACTATTTTAATGGTTTTCATGGATGATTGTCGACAGGAATCCGACAGGTGGGTCGGAGGAGCACCACGCCCTGGTTTACCACCATCACCGWCRGCCCCAGAGGCCGAAGGTCCCCCCGTGCAAATGGAACCTGTGGACCTAAGCGTGAAGACACCTGTCGTCCTGCAAGTGCCCAGGYACCCGAAACCGCAAAGTCAAAGGGACCAAGTCGCTCACGTTAGATCGAGAACGATTTCTTCGGTTTCGCATAAAAGCTCGCARCAACAATGCCAACATCGACCAGCTACAGATATYCCTAAACGCAATGTGRTAAAATCGGACGTAGTGATAAGAAAAGGATTGCTTTATCCTCCGACTTTGGTGAATTTGCCCGGTTTAAAAGACG…	yes	contig14674	OtP015-G03			8.94167	-1.44938	-2.81115	3	668	Non-Horn
contig14730_a366	CCGTCAAAATTAGAGCATAGCCCAATCGACCAAAAATCATTTCAAGATCACTTTTAAAAACGGAAGCGATATGAAAAATTTCTCGTCGAATTTTTCGACGCAAATGGAGTCATTTAGCGATGTGCCAAGTTTTAAAGATGGAGGTGAAACTTTAGAACAAAAAATGTTGAAGAAATCGATGACGCAACATGTAACGGAAAAGAAAACGGTCTCGATGACGAGAAGTACTAAACAGGAAACGTCTACGAAAAATTTTAAATTTGAATAAATTAAGCCATAATTATCGTTATTGAGGTGGTGTATTATAAAGATGTAATGTAAATAAATAAATAAAAAAACGCCGTTTCTTTTTTGGGCTTGAAATTAACATACAATGTATACAATCAAAAACATAAAAGC…	yes	contig14730	OtL018-G03			8.33364	-2.06682	-2.87352	4	905	Non-Horn
contig14750_a367	GAGGTTACCAAAATCTGTCACGTGATCACAACGTTGTTGCAATGGCGGAGGACAAAGATGTGATTGAGAAGACCATCGCCGAAGACTTGGTCGTAACCAAGTATAAAATGGCTGGGGAGATCGTTAACAGGGTCCTCAAGCAGGTTATTGACAAGTGCGTCGTGGGGGCTTCCGTTCGCGAAATATGCGAATTTGGCGATCGTCTCCTTCTGGATGAAACCAGCAAGGTTTTTAAGAAGGAAAAGGACCTYAAAAAGGGAATTGCTTTTCCCACATGTATCTCTGTTAATAATTGCATTTGTCATTTTTCGCCTGTACCAAGCGAACCTGACTATACATTAAAAGATGAAGATTTATGTAAAGTTGATTTAGGTGCTCACATCGACGGTTTCATTGCCG…	yes	contig14750	contig_262			9.56509	-0.647866	-0.241245	4	1250	Horn
contig14815_a368	GGAGTTGTTCGACGACCGTCGTAGTGTCCGCGGCAMACGTGATCGTTTTTGATTCATCCCGTTTAAAATCCGAACGTGGTGTATCTCGTCGTGTAACAACTTATTACCTATTTAGTGTTAAATATCCGGATTTTTTCAACTCAACAAAGAAATTGAGATTAATTTTTTTCGTGGTGGTGTTTATTTTTTATTATCCCGTGATAATATTGTGTTCAAAAATCGATTTAAAGAAAATTTTAACGGAGCGTATACTTACTTAAACAGTGCATAGACATTAAGTGAATAGATTTATACAGTGTGGTTTTTTTAATTTAATTTTTTTTTTGGATACATCGACCACGCCGGATTTTTCGGATTTAACGGATTTCGGATAACTGCGATTGCTGGGAATAATTCCCG…	yes	contig14815	OtP007-A03			8.56326	-0.698465	-1.05536	2	840	Non-Horn
contig14832_a369	GGAACCTGTCRAGTATCAATACAAACATAACCTAAAAATCTATTTCATTTTTAATCTGTGAAGTTTTGCCAAAAAATCTATCATATTATGGTAATTTAATACATATATAAACAAAAATATCCTTAAAGAAATACACAGGGACCAAATTGTACTCAATGCATTTATCTACAAAATTAAAGTTTAGAAGAAATGTTTTAACCTAAAAACAAGCAAGTATTTTTTCTTTACATCCATTTGCAATAATTGCTATTCCTCTYGTGTACTGGTTTGAAATATTTATAGTATTACCACACATATATCGAGATAACCCAAGTGTTATTTGGCCCATCATTCATACAGTTATGGGCACTTTCATCAGCGTAAACATAATTGGTAACCTTTTTGCTTTAATTTTCTTTG…	yes	contig14832	OtL004-E07			7.90037	-2.34735	-1.78088	2	1045	Non-Horn
contig14842_a370	TAATTCGGTTAATTTTCTAATCATACTGGTTACAAACTTGTTAAAGGTCAAATATTAACCGATAAAGATTTAAGGGAGTTAATGGRWKKTTYGAAYWSWMAWARTRTTKATGWKTRWRSWYATCGYKYKAACAGGATATGTTGGAGCTACCACTTTTTTAGAAGAAATAGCTAATATTTTGAAGTACTTAAAAGCTAAAAATAAAAACCTTAAATATGTATGTGATCCTGTGATGGGCGATAATGGTCAAATGTATGTCCCCAAAGAACTTTTACCAATTTACAAGAACACAATCATCCCACTTGCTGATATCCTTGTTCCAAATCAATTCGAAGTTGAACTATTAACCGATCGGAAGATAAAAACAATAACTGATGCTTGGGACGCCATCAATTTGCT…	yes	contig14842	OtP006-E03			8.10123	-1.73913	-2.08929	4	721	Non-Horn
contig14862_a371	CAGCGGATGTAACAAAACTCTTTTCAGCCGGTAAAATACGCATATGTTTCGTTATAAACTTAATAAAAGTATCTAAATTGTAATCAGAATAATTAAATTTCGCCGCAGCGCGTCCGTTATGAAACAACAATAACGATGGGACTCCAACAATCCCATTTTGGGTGTTAAATAAGTGATACATAATCGCGTTTATAGCCACCATTTTAATATCAGGAAAACTTCTTGGTAAAGCGTTAAAATGCGGAGCCGCCATACTCGAGAAAGGACAATATTTCGAATAAAACAAAACCACGACGCAATTTGCGGCTTCTTCTCGACTTGTTATGTTTGAATTCGGTAATAATAGCTTTAAAAGCTCTGTATCATTAACTAATTGTACTTCAGAACTTCCAAAATTTG…	yes	contig14862	OtL003-F07			9.27176	-2.00172	-2.46085	3	670	Non-Horn
contig14918_a372	GGATTCTATGGATATTTTTGACGTTTCTAGTTGACGTTTCATTGACGTTGTCAAGTTTTATATAGATAAAAATCCCTGAAAAAAACGAATGTAAATGTAATCTTTAAATTATTCGTATTAYCATAATCAAATTTACCCCTACCGATGATTTTAACGTGGAAGAATACGGCGCGAACTTAAAAAAAAAATCGTTCAGTTATCGGTGAACGTAGCTTCTAACCTCAATTCGCTCAAAACCACTCAAACGTATCAATATCGTTCCTTTTTCTAAGTTGTAATTAGTTTTACCGGTGATTTTTAACTTTAAATGAAATAGTGATGAGTGMGTCTTATTAAGTTAAGTTTAAATTATTAAATTTCAATTAAAAAGTTAAGTGTAAAAAAAAACATGAATAAATA…	yes	contig14918	contig_228			10.2227	-2.06356	-2.99098	2	1356	Non-Horn
contig15039_a373	CTCTAAAACCCGGTAAAACGTAGACCCCCATCGCCGATAAATACTTATCTATTCCGAATCTTTCAAAAGCATCGTTCTTTGCTTCCAAGAAATCGAGCGTTCCGAAAATTTTYGCAACGATTTTTGAGTTGATTTCGTGTTCTAATTGGTCACCTTTRCASGTAACCGAAGTACAATTCATTGCGGCTATTTGGGGATCTCCATCTTCGTCCTTTGTAAGACAAATTAATCCCACGTTTTGTTCAAGGACTTTTTCCCAKGATTTTCTTAAATCTTTCGTTGCATCTTGGTAACTAATTGCCYTGTTAATATTTGCACATTGGTTCTTCACTTCCAAAACCATACACCATGTGATTTAACACTTCCTCTTTGTGATTTTCTGTGATGTCTTGTACCCAA…	yes	contig15039	OtL011-B05			7.95386	-1.58846	-1.25626	3	492	Non-Horn
contig15078_b880	GAGTGATTCACCATCTTGTAAATCTTTACCTCACCGGCATCTACTTCGTAGWCAGAAGAACAAATAATCATGACTCTTCAAGCCGAGTTTGATGAAGCTGCTGAAAATGTTAAAAAATTGAAAACTATGCCTGGCAATGAAGATTTGCTAGAATTATACGCCTTGTTTAAACAAGGGACGGTTGGAGATAACACCACAGATCGCCCTGGAATGTTAGATTTTAAAGGTAAAGCTAAATGGGATGCTTGGACTACAAAAAAAGGGATGTCTAAAGAAGATGCCCAACAGAAGTATATTGAGAAAGCTAAAGGTCTCATTGCTTCAATTGGATTGCAATGAAYTTTTTGTCCATAAGACTTAAAAARTGTGGAAAAATTATTAAATTTTTATACTTTAATT…	yes	contig15078	OtL006-B10	OtL013-G11		10.6498	-1.74472	-1.76469	3.5	537	Non-Horn
contig15086_a374	TTGTTGACCATAAGGATTTTGTCCATATCCTGGTTGCTGATAACCAGGTTGTTGATATCCACCTTGGGGTTGATATCCACCTTGTGGTTGGTATCCCCCTTGAGGTTGATATCCACCTTGTTGAGTAGGATACCCAGATCCTTGATTCCCACCCGGATAACCAGACCCAATAGAACCCCCAGAATACCCYCCRCTACCACCACTTTGAGGTCTTCTATAAGGACTCCTTGTGGTGGTTTGCCCGGGAATTACTGGATAAGCTGGTTGAGGTGCTGAGGGTGCATTCGGATTTTCATCGTTGTTATTGTAAGTTTGAAGGGTTTGATGCACCTTAGGATTATCAGGCGTGTGGGCGTTTGCATCATCGACACATTTTGGTGTGCTTCCGTCTACGATGCA…	yes	contig15086	OtL004-A01			9.67641	-2.21781	-2.13639	4	795	Non-Horn
contig15102_a375	TTTGCATGTCCAATAACATTTTTTTAGTCTCAACAATGAAAACTACGTTTGTTATCTCATCTCTAATCAAGGTCATCTTACGAAGAAGTTYGAAATATTACGAGAAACGCGTTCGGTTTTTTAACACTTTGTATTAACGCCATCTATATGATACAGCACGAATTATGCACTCAAATGTCTCCAAGTTCAAATTTCCAGAAGGAAAAATAACTGTATGTAGTTGCTGGTTTGTTGCAAAAACAATTTTGTATTTTTCAGTCATAAAGTATCGCCATAAATGTCAACATTAAAAAAAGGGTTTGCATGAGGAGGATATTAATACAAAACCGTATGTAATTACAGTAGGTTATATTTGGTTTTGAGTTGTAGTATTTGTGCCCAGAAAGAATATGGGGGAAG…	yes	contig15102	OtL009-A05			10.6718	-2.0564	-2.20177	1	1007	Non-Horn
contig15134_a376	ATAGACAAAAGTGGAGTTTCGTGGCAGTCGTTTGCAGTAAGTCGCACATTCCGCAGGTTTCGGTCGCCTATTCCCGACACTGTTCACTTGGTTTATTTGAGGCCTCCAGCTAAATACTAAAAACTTTACGAAAATGTTTGCTGCCAGATTGATCGCCCCTGCTGCCGTCAGAAGCGCCCTGATCTCGAACACTAAACAATATTTGAGGCCGTTGAGCAGTGTGGTTGCCCAAAGTCAATCTTTAGTTCAGAGCCCAATTGTACAACAACACCAGACAAAACCAGCTTTGTTACCTGCGATACGCGGATTCCAAACTTCACAAGTTAGCAGGGACATTGATTCTGCTGCTAAATTTATTGGTGCGGGTGCTGCTACCGTAGGAGTTGCCGGATCTGGTGC…	yes	contig15134	contig_76			13.106	-1.80914	-2.37648	3	992	Non-Horn
contig15143_a377	ATTGCAATGAATGAAGCTAACTTTATTTTTAATGATTACAATACATTGAAATCTACAACTACATTTAATACGAAAATATTACAAAATAATCGGAATGAAACGTGTTAATATTAGTAATTTCATTCTTTCTTATCCTCTTCTTTGGCAATGTTAGAATTTTGTCTGAGAGCCGGTTTTAGCGGAGCCCCAGTTTGCAAAATTGGAATTTCGCGATGATCCTCAATGGCATTCTGATTGATTTTCGGAGCGGTGATGGTCAAAACCCCGTCCGAAGACAATTTCGACTCGACCTTTTGAATGTCGTGACCTTTCGGCAAAATATACTTCCTCGTGAATTGGCGAGAAATATAACCGTGCTCATCTTCTTTTTCCTCGTGTTTTCCCTCGATGGTAATAGTG…	yes	contig15143	contig_364			11.7049	-2.25825	-2.16703	4	782	Non-Horn
contig15214_a378	AATTACAAACATCTAATCAACTAAATCAGACAATGATAAAGTGATATTATTTACATTGGAACGCTTAACTTTATAAATAACTCGCCAAATTGCAGTTTWAATTAAATCTCTGAATCTTTCAGGTAGTCCATCAAGTTCTTCTGCCAGCGATGAAAAATAGTAACCATTYTTATTTGAAAGTTCCTCTTTTATAGCTCTTAAATCCGATGATACATCCGATTGAATCGTATTTACTATCTTATTGACATCGGTTAAAATTTCGAAATTAAAAAGTCTATGAAGCGTTCCATCGTTATTCCAAATTAATAAACTTTTAACGTTAAAAATATCAACCTTTCCGATTCTCCACTCGTTTTGGTGAAATCCTCTYCCAATGTACCAGTTTAAACTATTGTTTTG…	yes	contig15214	OtL015-D05			8.45903	-1.8527	-1.83197	4	820	Non-Horn
contig15272_a379	GGACACATAGATAATGCGTTGACAAGTGACATTACAAAATTCATTCTAAGAGGTGTTTTGCAAAGTAATCATGGCTACAGAACGTTATRGTTTCTCTTTAACTACTTTTAGCCCTTCTGGTAAACTAGTTCAAATTGAATACGCTTTAGCAGCAGTCGCCGCTGGAGCTCCTTCTGTAGGAATCAAAGCTTCAAATGGAGTTGTTATTGCCACAGAAAATAAACACAAATCAATTTTGTATGATGAGCACAGTGTTAACAAAGTTGAAATGATAACYAACCACATTGGGATGATTTATTCCGGAATGGGGCCTGATTATCGACTTCTTGTTAAACAAGCGAGAAAAATGGCCCAACAATATTTCTTGGTTTATAGAGAACCTATCCCGACAGTTCAATT…	yes	contig15272	contig_300			11.1944	-2.69449	-2.40646	3	831	Non-Horn
contig15307_a380	CAAATCGACGACAGACTTTAGCACAAATGCTAAGATCTGAACTGGTTAAGAAAGAAAACACCCGGACGATAAGATCATYTGGTAGTCGATCGAACGAATTATTTTTTGCTTGAAGTTTCTTAACTTTCCAATGTCCGGGTGYGGACAACCCCGGACTCGGCGAAACCAAAGTGTGATAACCCTGGTCCAGACTAGGGCTGCTTTTACCAAGTTTCGCAAAATTATCCAACAAATAATTCGTTTCTTGCTGATATTCCGGACTTGAATTCGAGTCTGACTGGCTTGTTTCCAACTTCGAATAGTTTTCGTGTTCCCARTAGCTCGCTCCGAGAGATAACAACGACAGATCAAGATTCGCCGCCTTCGGATACTTCCCCGGAAGTTGTTGATGAGGCGCGG…	yes	contig15307	OtL002-E04			11.126	-0.715334	-1.08479	4	757	Non-Horn
contig15319_a381	TTTTTTTATCGTAATTCTTATCAAAAAGTCAAGTGTCATCGAAACCATGATATGCACTTTAACACGGTGCTTGTGACGAGATCAAACGTGTGAAATGGCTCTACGAAAGTTAACGGACGCGGAATGCGGGGGCCCTAACGCCCTCGTCCATCTAACCTCACATTTTACCAGGGATAGAGCATTCGCGGAAACTCATGGTCATGCCTTCCCGGCGAGTTCCGAYCAACTGGTGGAACAGTTCTTGGCGGAAACGAGGGCTGCGCCCCAAACGTTTCGAATGGATGATTTGATGCGGGAAATGCATGAGATTGAGTCCCAAAGAGCTGCAATACCTCCAATTCCAGCTTCCGCGGTAAAAGAGCATTTAAATGATGATGCATGGGCYTTACAATATCTCGA…	yes	contig15319	OtP009-D08			10.513	-1.84115	-3.26776	3	638	Non-Horn
contig15420_a382	GGAAAGCAGGTTACATTATTATCGATAGKGCAGACGCCACGCCATTTTGTTAGAAACCCAACATGGATTTTTAACTAGACATTAAGTGCGCGTGTTCAACCAGGTGTAGAAAAAGGGATAAAAACGATGCCCTTCATGCGTTTTTTCAATTAACGGTGTTCGRCTAAAATCTATTTAAAACTATGCGAAAGTCCTAATATGCTCGCGACACCCACCGGACGCGATGGTGTTTTGTGCGTGAATTGTTTGCTGCGGTGCCGGCATTTCTTTAGCTGTTCGTTYCGTTCAATAAAAATCCTACAACCGGGGCCCTGGAGCCCCATTTCGATTTAAAACGTTKAACAGAAACCGCTCCCCAAGATGATGTACACGGGAACTACTACAGAGCAAGATAATCGC…	yes	contig15420	OtP003-G03			10.5288	-1.29042	-2.34201	3	1214	Non-Horn
contig15461_a383	CGATTTATATCATTGATTTAATATCTTTATTAGTTTAATTTATTTATTGCAAATATTCTATACCTTAAAAAAAGTATCTTTATAATATTTCAATTCCTTTATACTTTCTTTTATATCGCTTAAAGCGCGGTGATCGCAAACTTTCCTTGGTGCTTTTCTATAAATGTTTTCATTCCAACGTTGGCACAATTCCTTTATGGTTGAGACGTCAATAATCCTGTAATGTAAATAATTATCTATTTTTGGTAAATGTTTTCTTATAAACATTCTGTCCATATAAACACTATTCCCAGCTAATGGACTCATCCTTTCTGTTACATATTTTTTAATAAAATCCATTAATTGTTTTTCAGCAACTTCAATAGGGATATTAGATTTCCTTGAAGCTTCAGTTAGCCC…	yes	contig15461	OtL007-H09			8.6108	-2.06546	-1.98857	2	659	Non-Horn
contig15485_a384	AATTATTTTTAAAATGAMAAAAAAATTAWTAACGATAATGATCCGGTTTAAATGGCCCATTTTGAGGAATTCCCAAATATTTAGCCTGTTCAACAGTTAAAGTAGTCAATTTAACGTTTAAATGTGCCAAATGTAATCTGGCKACTTCYTCATCCAACGTTTTGGGTAACATGTAAACTCCAATCTTATATTGATCTGGTTTAGTCCACAATTCGATTTGTGCCAAAACCTGATTGGTAAATGAATTTGACATAACAAATGAAGAGTGCCCAGTAGCGCAACCTAAATTAACCAAACGTCCTTGCGCCAACACAATAACATGTTTTCCATTAGATAACTCGTATCTATCAACTTGCGGTTTGATGTTTACTTTATTTTTGGCGTTTTTCTCCAACCAAG…	yes	contig15485	OtL007-H06			11.025	-1.83737	-2.59107	2	752	Non-Horn
contig15568_a385	ACGGTGTTTAGATGGCGCACTAAGCCTACTKCTCTTTTACCGAAAACGTGTTGTGGTGTCGAGAAACGCACAGCTTGCGTTTAAATATAAAATATGGCTCCGAAAGGTAATAATATGRTTCCGAATGGCCATTTCCATAAGGATTGGCAAAGGTTCGTGAAAACATGGTTTAATCAACCGGCCCGTAAATTCCGCAGAAGGCAAAATAGGATTAAAAAAGCTAAAGCTATCGCTCCTAGACCCGCTGCTGGTCCATTAAGACCGGTAGTTCGATGCCCTACAATCAGATATCATACTAAAGTGAGGGCTGGTCGTGGATTTACTCTCCAAGAATTGAAAGCAGCTGGGTTAAACTCATCTTTTGCTCGTTCCGTTGGAGTTGCAGTCGATTATCGTAGA…	yes	contig15568	contig_273			12.6243	-2.16454	-2.17951	3	810	Non-Horn
contig15612_a386	ATGCCTTAAGTTCTTTATTTATTTATTTCTTCGTTTTGAGCTTAATTACAATCCAATCTCACTATAAATCTACCGATAGCCTTTACATTATAGCCAATTAACCTTGTTAATTAAGTCAAAACTTACAAATGAAAAAGAAATGCAAAATCTTRAATAGAAAAAAAAAGGATTAAGTTCTTTATTTGTGAAAATAAAAAGCATAAATATACATAAAGATTATTTCTTACAAATATAAAAGATATAATACTCGTAATTCTCGTTATTCCAATTTCATTTTAATTTTTTTTTAATTTTTACAATCCATAATTGTTTTTTTTAGATGGGGGGCAGTTTCATTCATCGCAGACAATTTCGAAAACCTGCAAGCATCAGTTATCTGATTTATTATGTCTACGTTGA…	yes	contig15612	OtL019-G10			10.264	-2.15235	-2.20539	1	785	Non-Horn
contig15703_a387	AAGATTATCTATTTATAATTTATTGAAATATTAACCAATTTACACTACAAACACCTTTTCTTAATAATCCTAATCGCTAGGGCCACATGAATCGAATAAACCCAAGYTTTTCATGCGGTTAAATTCCGCTTCAATGTTATACGTCGAAAAAAACTTTACGTATCGTTCYTTCGCAGGGGCATTAATAAGGAAATATTGACCTACTCCAGCCACCACACACAATCCAATCGAGACAATCAAGTTCTTTTTAATCTGGTTGTGCAAGAGACGTCTCATCTCGGGYCTTGCCGCCCTACTAACAGCTCCCGACATCTTTAACTGATAATGCGACAAAAACGCAGTTCACGAAAAACGATCGAAGTGGTCGGCTGTCAAAATTACACAATCCARAGTACGCKK…	yes	contig15703	OtL018-G10			9.94138	-2.15407	-2.98818	2	415	Non-Horn
contig15723_a388	AAATTTAAATTTTTATATTTGTCTTTTCACAGTATCACACATACATATTTAACTACAATAAGGATAGTTAGGGCAAGAATGAGGATCTACTCCAGCTGGAACTTGCGCGGCAGGTTGATGTTGTTGAACTGGAGCGTGATGATAACCTTGACTTGGTTGAATAGCTCGCCCTTGGTGAGAACTATGTTGATCGTAGGCTTGTGGATTATCAACTGGGCCAAAAGCACCAGATTCTGCTAAACCTTCACCACGATAATCACCATCTCCAGTATATTCYCCACTTAACAAAGCTTTTTCRTTACCTTGATTAACTTGATTATATTGTGGTTGATATTGAGGTTGTTGTTGAGGTTGATACTGAGGTTGATATTGAGGTTGGTGTTGAGGTTGATATTGTTG…	yes	contig15723	OtL019-G04			11.3243	-0.465668	-0.826617	3	457	Non-Horn
contig15833_a389	GGGGCGCAAACTCAACCATTTGGKGCTCTTCTCCATTTTGTGTAAAGAGTCGAAAATGGCATCGAGAATCCTTACTTTGGGATTACGATCATTAAAGAAACCTATTCCATTGGGTTATTGTGCTGCTAGCGATCACAGCGCTGCCAGTGAAATTCGTGCATTAATTGGAAACCGTGAAGTTGTTGGTTTTGGACATAATGGACAACCTAATTATGTAGATAGCCCCTCATTTCCATTACCAGCTATTAGATGGAARGAACCAACCAAAGATATTCTTGCTTTAAAAGAAAAGGAAAAAGGAGATTGGCACAAACTCTCCATTGAAGAGAAAAAGGCTTTATACAGAGCAAGTTTTAGACAAACCTTTTCCGAATTTAAAGCTCCATCAGGTGAATGGAA…	yes	contig15833	OtL014-B12			11.6761	-2.04769	-1.63528	2	770	Non-Horn
contig15843_a390	AGGACTATTTAAATCAATAAACTTAATATTAACTACAATTTTTATTTTTCATCAATTTTGGCTACAATTTCCGCATATTTCTCTTTTCTATACTCCTTTTTTGCCTCATTCAACAAAATATTATGAATCCAATTCTTATTACTCGCATTATCCTCAATTAAAGCCGGATATGGATTACCTCTAAGTTCTAAAACGGCTTTAAGATGTTTCTCCCCCGGGTAAGGTCTAGGCGCTTTATACATCCTTGTGTAACAAACCCGGCTATCTTGAAACCTCGGTGCRAGAACCTTAAACAATTTATGAACCAATTGCTTTTCAACTAACCAATAATCTGCCATTTCCATCGTTGTTTTGTGACRATCCCCATATCGAATCGCATCGGATATTAAACGCTCGGCG…	yes	contig15843	OtL007-B06			8.81196	-2.28869	-1.94164	3	654	Non-Horn
contig15885_a391	GAGTGTACCGCAACATCTGTACTACGACCGGCACCAGGAAGTGCGACCGAAAGTGCTCACGAAACCTGCGACTATCGAGATCGCAGGACGATTCGACGACAATAATCGCTCGGAACCGATGACGCTTCGTCGACGCCGGCGACGGCGACGTAGGGGCTCCWCGTGTCGTGAAATTCGACGTCGYCYCCGACGGCGCTCACGAAGAAGCTACGCCGCTCCGTTCTCGGAGTGTTGTTTTCCAATTGGATGGGAGGCAAAGAATCAAGGTGACCTTGATCCAAGGCCGACGTGGACAAAACCGCGACGAAAAGCC	yes	contig15885	OtL008-D09			8.7138	-1.9837	-1.8183	4	313	Non-Horn
contig15893_a392	ATAATTACTCGATATTATTATAAAAAGCATCATACATGAAATAAACCATAAATTACAAAAACACCGCCTTATTTAACAGGTTTCATTTGCCATAAACCATCGTTTAAATAATGACAATTTTCAACTCCAACACCTTTATTAATTTTACCTATTTCTTCRGTTGATAGAGTTGTAATTCCAATAGCTAGAGCATGTTGKTTTCCTTCAGCCATAATAGCCACCACAGTTCCTTTAGGAACTTCAGTCATTTTGGCACCAGGAGATGTTAATCCAGGACACATAATATTAGCACCACTTAAAACGAATCTAATTGCGCCTTTATCAACTTGTTGCATTGGCAAGAAAAACGGATATTTGTGCAAAAGTCTTAAAGTGGGCATCCACTGTCCTTCTCGTTGT…	yes	contig15893	OtL019-D01			9.10523	-2.51489	-2.48185	3	680	Non-Horn
contig15929_a393	TGGTCGAAAAATAAAAATCTTTATTGATTTGTCACATGATTATTTACRAAATGTTTTTTATTTTTAATTTTCCAAAAAGAATTTACCAAGCGTGAGCAACAGGTCCGGAATAAGCRGTATACGTCGATGGGCCTTGCACTATGGTCTTTGTGACTGGAGCGGTGTAAGCTGAATAGACAGATGGGGCTGGGTATACAGCTGGGGATGAGTATACAGCCGGGGCTGAGYATACAGTAGGTGCAGCATAAGCAGCAACAGCTGGGGCAGCATAAGTTTTAGCTACAACTGGGGCGTTGTAGGCTGCATAAACAGTTGGGGTGATGGTTTTAGCAACAACTGGAGCGGCAATGGTTTTGGYAACAACTGGAGCTGGGGCAACAACGGTTGGTACAGATTTGC…	yes	contig15929	contig_123			13.1357	-0.770623	-1.09858	4	746	Non-Horn
contig16019_a394	CATTAATCTTTAAATGAATCCGTTTATTTATTTTTTAACTTTAACCTTACTTAGAAAACATAACCTAAAAAATACTTTCGGAACACATTTTTTATCCATTTAAATACAAAAAAATTTTAAATATTCCTTTTAACGGCGTCTTCAATGTCGCCGATAATCCCCTTGAATTTTTGCCATTGCTCCATCGTTAGCATAATCCCTTTCTTCCCCGGTTTTAGATCACCTCCGGCATCCATATAAAACTCTCGGATATTAACGTACCATTTTCCTTTAAATTCGGTTAATTTTACAAAACGATTCTTTCCTAAATCCCATGATAATTCATCATCCCCGTCGGATTTTTTCGATGGTTTTGCAGCCTCCGGTTTCGATTTTTTAACCGGTAATTTATCATCTGGA…	yes	contig16019	OtL015-E04			10.3397	-1.87706	-3.21598	3	536	Non-Horn
contig16058_a395	TGAGAGCGGTTACTGCATATCTCGAAGCYGGATAAACAYTCTTAAGGGGAATTGTAGGAACGAAATGTCCAGCAACGCTGTTAACATTGACAATAACKCCGTCGATGCTATGTTTTCTCATAACRCGAATTGCTTCTCTTAAAGCAACGGTMACACCAAAGATGTTAGTATCCAARACTTTTCGCCATTCGCTTGCRTCCCCGTCGATTATATTTGTTGGTYGAGCAACGCCTGCGTTATTTATAAGAATTGCTACTGGGCCGATATTTTTTTCAGTCCACTCGAAAGCGCTGATTATATCTGAGCTTCGATGGTCATATCAGCTCTGTARGAATGTAGTTTACCCSGTTGATTTTTTAGTTCTAATGAGAGATTTTCGATGTTTTCGTATCTTCTAGC…	yes	contig16058	OtL009-B10			11.4139	-1.26162	-2.38186	3	497	Non-Horn
contig16225_a396	GGGTAAAGACGGCAGCACTGTGCTCGGTTTCCATTTGACATGTGCCGCGTTTGACATTCGCGATTTATTAAAAAAAAGGAACAAGCGAAAACGAAATAACACGTCGTCGTTGCTGTTTCGAGATGAACTGAGAAAGCGAGTTGTTGTAAAAAAAAATAATTCATCCGTCATCGAAACCGAGCTACGAAGCGAAGCAATAAGATAGAGGCCGGATTATGTACCATTGAAACTTTTGTATATAGAGTGGTACCGAAACACGATCGAGCGCAACGACGACAGACTCTCTCTCTTTGCGTCGCGAACAACCCAAAATATCTATACATACTATACCCAGTTTAGCCGGCATTTTTAGTGAACGGTTATCACATTGTCAAATTACGTCGAAAATGGCGTCCGAAT…	yes	contig16225	contig_434			10.0756	-1.55225	-1.56201	2	1482	Non-Horn
contig16242_a397	GKTAGGTTATGGAATTTTTATTTTAAGAAATAAAATCAAATCAAAGTAATATTATWTTATATCTTGCATCCCTTTTGGTTAATATAAGTRTAAACAAAATTTAAAATGGTTGTCCTGGTGGAGCTGGGTGATGATGTTGTGGAGGATGGAATCCTGGCCATTGTTGTCCTGGTTCTGGCATTAATTCWATCGGTGGTGGGGGTTGTTGAGGATGAGGATGAGGGTGGTGTCCACTCCATTGYGGGGGGCCCATACCTGGCATTTGCCCATGATCAGGGAGCAACTCAATGGGTGGTGKTTGWGGGGTTGAGGTGGTCTATGCCATGGTGGGCGAAAAAAATCTTGAATTATTTTCTTCACTCATCTCCAATTAATTCAAATTGTAATAATTTGTTATTA…	yes	contig16242	OtL004-F02			11.0095	-1.93399	-2.20691	3	459	Non-Horn
contig16330_a398	GTGGCAAASMSKSRRYMACTCAGTTCMTCWCAGTTCCTCAGAGCGTCTCGTAGAGTTCACAAACGTCCTTTAATCCATCCTCAAACCAAGAAGTTAATAAAAATGGCAAAGTWTTCCATTCTAGTTATTTTAGCAGCGGTTTGTGTAACCGCTTATTCTCTGGAATGTTACCAATGTGTTAATAAGTGTGATGATATCACGAAGGCCACTAAAATAAAATGCGATTCCAGCAATACCTTAAAGTACACTTGCTATAAAAAAGTCGAAAAAGATAAAATGTCTGGGGCAATGAACACAACTCGAGGATGTTACATTATCAGAGACGATAAAGATAAAGGCTATTGCAACGTTCCGGATCCTTCGAAAGCCGAAAGCGTTTTCTGCGAAGGTTGCACAGAA…	yes	contig16330	contig_211			11.5076	-1.21102	-1.88516	4	662	Non-Horn
contig16341_a399	GGGGGGGACATSAGTCTAGAAAGTTCCTTTCGGTATTCACGATAAGAATTAAACCGTCATAAACAAACCGATCGATTCAAGATTAAGTAAAAGTTGAATTAACAAGAAATTAAGTGCTTCATAAATAACTAACATAAACAACGAAAAATGGCTTTTATGATGCCGGTAGTGAAAAACGAKAGTGRGATATTTACAAATCGAATCGTTCTCGGAGAGCTTCAGAATGTTCGAATCCGAGAACGTGTCGTTCGAGGAAGGTGTCCGAGTGTAAATCCGAGGGACCAAGCTTGTCAACGTCTCCGGGATCAGATTTTTTCTCACCAGGACATCGAAGCGTTCCCGCGAATATGTCTTCGCGACAATATTATTCAAGAACCAGTTCGCGAGCCTCCGAAAATA…	yes	contig16341	OtL004-C05			7.8772	-1.38951	-2.80587	3	1029	Non-Horn
contig16432_a400	CTACTTCATCTTTAGATGCTACATTTTTAGGTACCTCATCTTTAGGTGCTCCATCTTTAGCTACTTCATCTTTAGCCACTTCCTCCTTAGCCACTTCATCTTTAGCCACTTCTTCTTTAATTGGAGCTTCTTGTTTCGGTGCTTCTACTTCAGGTTGAGCTGGTTGCGGAACTGGTAACGCTTCTGGTTGTTTTTCCGATTCTTTTTCTTTCTGGACTTCATCCTGTTGACTTGGTAACGCAATCGGTTGTACTTCAGGTGCTTTTTCTTCAGCTTCTATCGGTTGTTCAACTTTTTGCTCGCTTGGTTGACTCGGTTTAGCTTCTTCAACTGGCAAAACAACGGGTTCATTAACTTTTTCTTCGTTAATTTTTCCCTCGTCAACTTTTTCTACATTCG…	yes	contig16432	contig_415			13.9761	-0.837559	-1.80326	4	863	Non-Horn
contig16454_a401	AAACCGTTTCTTCCACGCCGTCATCCTCGTTCCGGKACGGACAACAAAACCGTCTGGTTCTCAATACCTAACTCGGTTCGTGTTCTTATCTTAACTTTAAAAAAAAAGTGGAAAAGAACGCAAAAGAAATCATGTGAAACCAAAAAAAAACTTCAAAGACTTTTTAAAAAGTTTAAAGTGTAAATATTTTTAAAATGTGTTACTTCTTCGTTTGGACGATTATCGATGATCGATTGTATTGGAGATGACCATGTTTAAGAGGGCTATGATTTTCGTGACCTTCTTCGGATCCTGCTTTGCCATAGCTTTGCTGGTGGYCAGCCTGGGGACCAAACAGTGGGTCAATGCGGTTGCTAAACGAACAATAAACCCCGAAGAAAGTCAAGGGAGGATTAATTT…	yes	contig16454	contig_193			10.7019	-2.71206	-1.86894	4	1274	Non-Horn
contig16480_a402	AATCTCGTTCAACGTTTCTCAAAAAAAGTTAGTGTAAATCTTTAAATTAAGATGTTGGCCAAAAAGCTATTTACTTAATAACATCAAAAAGCACAACAWTYCAAAAATGTGCTTCTTTAAACAATATAAGGACTAAAGCCTCAGCTACGATGCAAGAACCCACCAAAGTCGAAAAAACTTTAAATGCAGTTCAGTTGTTAGGTCGAGCGGGGGGTAATCCGCAATTAAAAGGTTCCGAACAGCACCCTATGGTGGTGTTTTCTTTAGCGACTCACACGAATTAWRGGGTATGAGTCGGGGGAATTTTTACAAAGAACTGAATGGCATAGAGTAATATGTTTTAAACCTGGTTTAAGAGATAATATTATGAACTTTTTAAAAAAAGGACAAAGGGTTTAT…	yes	contig16480	OtL006-F09			9.42391	-1.85526	-2.32659	3	618	Non-Horn
contig16507_a403	GGTACACATCAAAATGACAGTTTATAACATTTATATTTTCGATAGAAACGGCACTTTGCTTTATTATCACGAATGGAATCGGTTTAAACAATCGGGGATGACTAAAGATGAAGAAGCAAAGTTAATGTACGGYATGTTRTTTTCATTGAAATCGTTTGTGATGAAAATTTCCCCATTGGATGTGAAAGATGGTTTTCAATACTATAAAACGTCGAAATACACTTTGCATTATTTAGAAACACCATCCGGACTTAAATTTGTTATTAACACGGATAATGGGGCTCAAGGTGTTAAGGAGATACTCCAACAAATTTATAACCAAGTTTTCGTTGAGTATGTGGTCAAAAATCCTTTGGTGAAAATGAACGAACCGATTGAATCAGAATTATTTAAAAGCAA…	yes	contig16507	OtP017-G11			8.89544	-2.14975	-2.20834	2	668	Non-Horn
contig16536_a404	CTTCTAACCTRRRAATTAAATTAACGCAAAATTAAACATCAATTTTTAACAAWATGTTCAGGTTCGCTATTAAGTGTGGATTAGCGGGGGCAGCTGTATATTACGTTTCCGATCAAGGTGTGTGGAAAGAAAGCAAGGAAACCACCAAGTTGTACAACAAAATCAACGATTTCTTATGCCCCTACATGAAACAAGCCCAAGCTCAACTTCCTATTGAAATTCCYGAGCTTCCAAGTACTGGAAGAATATCGTACTTAATGAAACAATATTGGAACCATGGTGTCACAGCTACTTTTATTTATATAGGAGATTTACCCCAAAACGTTACCAAATTAACGAAATCGGGTATTGATGCTATTAAGGGTAACGAAGAGATGAAAAAACTTATGGATGGGTTTA…	yes	contig16536	contig_194			10.4799	-0.927092	-0.642315	3	486	Non-Horn
contig16643_a405	GGGATTCTTTCAAKTTGRCATMWAYKTGACACTATGGAAGTTTACACGTGGAGGTTAGTTTACATTTCATGTGTGATTAAATATTATCTAAATTTGTTAAATATAACGTAAATCTACACCTAAACTTGTAATAAATATGAAGACTACCGAGAAAAAGGGTAAACAAGGAACGAAAGGTTCGAAACAAATCATTGWAGAGAAAAKGTATCCACGCTGAATTTCTACCGTAATATGGCCATATTTGCCAATGCCACATCTTTAATTATTTTGGTGTTTTATAATTCATCAATAAGCATAGCACTTTAYTTATTTTCATGTTTAATTTATATAGGAGCTTATCAATTTATGGTGTASATGGCTRAAGCAAAATATACCGATTCAGGTCAAATTGTTGACRGT…	yes	contig16643	OtL008-G05			8.79879	-3.09679	-4.42623	2	746	Non-Horn
contig16649_a406	AAAAAAAATTTTTCCCGTTAACCTCAATCTCGTCCCAAACGTCATTACCCATAAAGAAAGACAAAAAAAAACGATTAATTCCAAGAAACAATGTTTTAATTAACTCCTACGCAACAAACAAGATAATCATTTTCTTCCAATATGTTTTTTCCGGCGRTGATTTTCGCCTTTTTAGCGATACCATCGGTTTTAATCGACTCAAAGAGYGTTTTTCGAAGAAGTTCCCAACAAAAAGAGGATTTCCTTAATAACCCCAAGTATTTAAACTACCAAGAGTTAACTCAGTATTTTAAAATACTCCAAAACGAGTATCCGAGCTTGGCGAAACTAGAAAGTGTYGGMAAATCGGTTAAACAACGCGATTTATGGGTGTTAAGGGTCGGAAAAGACGTCGAATCA…	yes	contig16649	contig_380			10.2668	-2.35497	-2.29781	0	821	Non-Horn
contig16662_a407	CAATTTTACACAATGTAACCATCAAAGGTGCCCCAGAAATATCAAGTTTATCACAATCGAATAAATCCTCGGAAATATCTAATTCAACATTATTACCATCGATAGCTGTGCTTTTAATATGAGGTATGCTTGTATTCCATAAAGCAGCTTTAACAGCTATCGATATCGCATCGTAAAGGTTYCCACCACATTCAAGGAGCAAAATATCAACATAAATTTTCCAACATTTTCTTCCTTTCAAAATACATAATTTTGTACTATCAAAAGCACTGGGAGATTTATAAGCTGCAGCTAAACAATTACTTATTTCTGTAGCAAGATCTTCCCCACCWCGCCCTTCAAAGTTMGGTGTTGCATTAGCTGAACAATCGATAAAAAACTCAATATTTCCTTCGTTTG…	yes	contig16662	OtP004-B07			8.23421	-1.95079	-2.30667	3	707	Non-Horn
contig16721_b881	GGCCGGGGGATGTCGCTKKAAGTCGCGTCAATAAAAGTGTAAACAAATCTAACCTCAAATAACAACTAACACAAATTTAATTGAATATTTGAATAAATTAATTAGTTATTATGGCTGATGATGGAGATAATATCCCTCCAATAACCGTTAAAGAACCTCTAGATTTAGTGAGGTTAAGTTTGGATGAAAGGATTTATGTAAAAATGAGAAACGACCGCGAATTACGAGGAAGACTTCATGCTTATGATCAACACATGAATATGGTGCTTAGCGACGCGGAAGAAACCATAACGAGTTGTGAGATCGACGAAGAAACTTATGAGGAAGTTTACCGATCCACAAAGAGAACCATTCCGATGTTGTTTGTTCGTGGTGATGGAGTAATTTTAGTTTCCCCAC…	yes	contig16721	OtL018-A04	OtL006-A06		8.91717	-2.37047	-2.3593	3	569	Non-Horn
contig16745_a408	GACGCTTCGGTCGAAGTGTTCGAACGCATTAAGTAGTTTTCAAATTTTAATAATAATTATTTTTGAATTAAATTTGAATGATAAAGAATTAASTATTGACAAAAAATTATATATAAGAAAAGAGTGATTTTTGTTTTTTAAATTTTTTSGRAAAAAAAATAGTTTAAAAATGCCGGGAAATAAAATAGTAGTAAACGACAATTCCARTACAGCCGAAAGAGTAATCAAATTTTTCGGCGAATTCTTCGGTACAGCAGTTTTGGTGTTTTTGGGTTGCCAAGGATGCGTTAAATTGACAGCAATCGGCCAACCTCATGAGTCAATAGCCTGGATTTTCGGTTTAGCCGTGATGGTGGCGATTCAGTGTTTTGGTCACGTTTCCGGTGGTCATATCAACCC…	yes	contig16745	OtL019-F05			9.33282	-1.8688	-1.72872	2	1103	Non-Horn
contig16842_a409	GATAAATAAAGAGTGAAGTGTCAAAAAATTAATCTTAAAAATACTTAAAAGTTAAAATTGGNCTTTAAAGTATATAGGACTCGATAAAGTATTTAAAGTTTTTTCGATTATGAAGCAAAATGGGGGACTTAGAGCTTCGCTTTATAAATTGTACAGGATGGATGATTTGAAACAAGGAACTTTAGTGGGGGAGGATAAATACGGGAATAAATACTTCGAGAACAATTATTTTTTCTATGGGAGAAATCGTTGGATTGAATATGCTCCGAAATATGGTACTGATTACGATGCAAGTCAAGTCCCTGCTGAATGGTATRGTTGGTTGCATTATAAAACGGATTTACCCCCGTGTCATGATAAATCGAGACCGAAATATCCATGGATGGCAGATCATCGAGR…	yes	contig16842	contig_264			8.2288	-2.45105	-3.65723	0	799	Non-Horn
contig16878_a410	GACACTCGCSGCCAATCTCGTTTCAGACGTTCAAGTAGTTCATTTTCAGCATCCCCCGTTTCAAGTCGCAGTATCCGCAAACAAATTGTTATAAATGGCGCAATCTCAAGTAAGACAAAATTTTCATAGAGATTGCGAAGATGCGATTAATAAGCAAATTAACATCGAATTGTACGCGAGTTATGTCTATATGGCGATGGCTTAWCATTTCSAATARARATGATGTGGCCTTGAAAGGATTGCATCAATATTTCAAGAAGTGTTCAGACGAAGAAAGAGAACATGCTGAGAAATTTATGGTTTATATGAATCAAAGAGGTGGGAGAATTGTTTTATTGCCTATTTCCCAACCGGAAAAACAAGAGTTTAGTAACGCGTTAGAAGCGATGGGAGCCGCTT…	yes	contig16878	OtL003-C12			10.9125	-1.33069	-1.37918	4	876	Non-Horn
contig16890_a411	GACATACATTTCGTTSACTCTATATAGCTGTGTCGCATCGTATAGAAAACGTTTGTGATCAGCATACACACTTTGTCTATTGCGCCTTCAGCAGAGAGTGCCACTTGTGTGAGTGCGAGACGACGGGAGGGTCCTCATAGAAAGGAGTCTGGGAAAAGGGGACGAAAACCAGGGAGAAAATCCAGTGAGAAGGTTGATATGAAGGCTAAACTGGAGCGCAGTAGACAAAGTGCTCGAGAATGTAGAGCTAGGAAAAAGTTAAGGTATCAATATTTAGAAGAATTGGTAGCTGACAGAGAAAAGGCTGTGCTTGCTTTAAGAAAAGAATTAGACAAATACCAGAGCTGGGCTAAAGAAATAGACGCTGGTCATATCCCAGAAGGAATGCAAGAAGAAATT…	yes	contig16890	OtL018-C01			10.3523	-2.12701	-2.73208	4	535	Non-Horn
contig17039_a413	CTGAATCCAATCGAATTGTATTATCTGACKATTTACAAATTCTAAAAATATCTATCGATAAAATTACAACTTAATACACATCTAATCTTGTTTCTAAATTCGGTTATAAAACCGAACATTATTTATTCCTCTTATTTTCTTGTGAAAAAACATAACTTTACGGAGTAATGGCTTCGTTGAAGCCGGTGTTGTATTCCTCGTGGAGCAGTTCATGTTCATGGAGGGTGAGGATCGTTATGAATTTCAAGGGTTTAGGATACGACCTGAAGCCGATATCCCTGGCAGACGACGAGCAACATGACGAAGAATTTCTCAAGATTAATCCTCTAGGGTTTGTCCCAGCTTTAAAACTRCACGATCGCGTTTTGATCGATTCTTACAATATTATGATATATTTGG…	yes	contig17039	OtP001-D05			8.91401	-1.418	-3.02328	3	878	Non-Horn
contig17089_a414	GGCCCATCCTCAATCCTTATTCCAAGAAGAAGGAATCCCTTSGCATTCGTCCTCCAGACGCGGGATTACACGAACGTTTTGTAACATTCAAAAACCTAACCTTAAAAAAAATACGCGAGCTCATACAAAAACTGAAAATTCCTGAAAAATTTATTAATTGACACATTTTTGTGGACACTAACAAATACTTGATTAACAATTATTAGCATTTTGATTTATAACTAAGAAAAATGTGTCGTGTTTTCGAAATAATTATAATCGTGGTCGCGATTGTGCCGGGAATATTTTCCGGAAGTTGTCGCGAAGCAAAATTGTGCTGTCCAGGTCGGGATTCTTCTTGCGTAGTACAAAAGGCCCCGATTAACGCCATCATCGAGGATTTAAGCGATAAACCCTGCT…	yes	contig17089	OtP016-D10			11.7276	-0.605054	-1.66481	4	779	Non-Horn
contig17102_a415	GTGGGGAATGCAATTTTATGGAAACCAAGTGACACCGCGCTCCTTTCAAATTGGTTAATTTTTAAGATTTGCCGCGAAGCGGGGGTCCCCCCGGGCGTCGTTAATTTCATCCCCGCCGATGGCCCGGTTTTCGGATACACAATAACCGCCTCTAAGTATTTAGCCGGCATTAACTTCACCGGAAGTGTCCCAACCTTCACGAGATTATGGACCCAGGTTGGAAAAAATATCAACAAATACGTGAATTTTCCACGGTTAATCGGAGAATGCGGAGGGAAAAATTATCACTTCGTGCATCCATCAGCCGATGTTGAAACGGTCGTTAACGGAACGATTCGGAGTTCGTTCGAATTTTGCGGGCAAAAATGTTCGGCGTGTTCGAGAATGTACGTTCCWGAG…	yes	contig17102	OtP019-H04			9.79595	-2.22908	-1.68312	4	1243	Non-Horn
contig17116_a416	GTCAAGAAAGGAAAAAGGAAGCTCAAGAATTAATCGGACAAAGAACTATTGATGCTAGGTCAATTTTTGAACAAAATACTTCGGCGGGACAAATAAAACGTACTCCAGAAAAACCAGTGAGAGCATCCATTTTAAAAGCTCAAAGTCAAGTTGCAGAGGCTGTTCAAAATCATGTGCAACCTGAAGAATCAACAGAACAACCACCTCAACCTGTTCATGAGGAACCAGGAAGTGATGATGAATCCGATCAATTTGCTACAATTAAGCGATCTCCTAAAGATATTGAAAAGAAAACTGCAACTAGTCCTATTGTTGAAGAGAAAAATGGTATAAATAGTAAACATGTTGAAGTTGTTAAGGAAGAACATAGGGAACAACCTAGGGTGTTGACRGAACAAC…	yes	contig17116	OtL011-D08			9.88494	-2.08017	-1.835	4	1126	Non-Horn
contig17207_a418	GAGTCGCGTCCGGGACGCCGAGCGCTCGAGTTCCGATCTCGACAGCCGCTCGAAAACACGGAACAAGTGGGGACTCTGTGCTCGAAAACACGCGCGATCCTCAAATGCTCAACACAACTATGCATTTTAAAAACACAACATTCAACAAACTATWCTAGGGCAGAACGGACYCCGTTCTAAGCCACTTTGCACGCGCTTCGCAATTTTTGATTTTTTTCACTATTTGCTTAACTAATAAAATTTTAGTGTAAGTGTCGATATACGTATAGAATAAAAACGGCTCTTTTTCAAACCGATTGAAATTTCTTTTCGTAATAATATCTTCATGGACATGCCGTGGATAAAATCCTGCCTGTGTCACCAGGAAAAGAAGAAACCACCCGCTATCAGCMCACCGAT…	yes	contig17207	OtP018-F05			7.99527	-1.71951	-1.2148	4	889	Non-Horn
contig17232_a419	ATGGCTCTCGCGATGTACATGTAGTAAACATTTGTGGCTAAAGCCGTTAGTATCCATGATATTACAAACATTACAGCTGTTGCTACTATTGTCCATTTTCTTCCGATAAATTCGATTAATTGACCTCCAATTAATGCTCCTACAAGAGCTGCTAATGGCATAAATCCAGATAACCACGAGTACTCGTAATTGGTGATTCCTAAGTCCTCTTCTAGACCTTTCTGGGCTGGTGCTGTGTATGCAGTGACGAATCCAATGACGAAGGAAACGATGGAAACCGATACGGCAGTGAGGATTTGAGAATAAGTTACTTTTCGCCCTTTCATCTTTTGAGTCGTTGTTTCGTTATAAACTTGGTCGTCGTCTTCAGCTTTTTTCTTCAATGGCTCAATTTCCGGT…	yes	contig17232	OtP007-H11			9.92864	-0.81901	-1.11081	2	719	Non-Horn
contig17235_a420	GAGTCAAAGCCGGAATTACAAATATAGCATCAGGGAGTAGAAATACCGGGACCGCGGCAGCGTTTCGGGACGCTSAGTTGAAACGACGACGGGCGTCGAGCCGCACTTTCACGTTTTTGGGACGTCTCTTGCGGACGGAACGGCCCGAAAATGGACCCGGAGGCCTTCCTCGACATCGCCAACCAAGTGGTGAAACTGAAGATGTTCCCCTATTTTGACGTGGCGCATTGCACGTTATGCGCCCTCGCCGTCCGTGAAGATCTGGGAAGCGGTGCACAAGCATTTTCAAGAAAGCACCCGTTAGCTTGTTGGTTATCATATATGTTGGTAGTGTTTGCTGGAGGAATGGTAGCAAGTGGTTTRTTAGGAGAACCAATTTTATCTCCACTCAAAAATACT…	yes	contig17235	OtP020-H06			10.2235	-1.90963	-1.87818	3	1203	Non-Horn
contig17275_a421	GGGATAGCTGTCACAACATAACCTTAAAATGTCAGTAATAACTCTATCAAATTAATTTTTAATTTAAGTGATTTTTAATACACGCAAYAATGGGGTTTCTTACCGTTTTGAGAAAGATGAAGCAAAAAGAGAAGGAGATGAGAATTTTAATTCTCGGTTTAGACAACGCTGGTAAAACGACGATTTTGAAACGTTTTAATGGGGAGGATATTAATACGATTTCCCCAACGTTAGGATTTAACATAAAAACTCTTGAACATAAAGGCTTTAAGTTGAACATGTGGGATGTTGGTGGCCAAAAATCATTAAGATCTTACTGGAGAAATTATTTTGAGTGCACAGATGGTTTGATTTGGGTCGTTGATAGTGCTGATAAACGAAGGCTTGAAGATTGTCGGA…	yes	contig17275	OtP018-D03			10.325	-1.7195	-1.29757	3	698	Non-Horn
contig17278_a422	GGAATCACAGTGACCCACGATTTGTGCCACGTTGTTTTATATACCTCCTCAAACGTTAGCGTGTSGCAGTCGCGTATTCATCTTTGCGAAGGGCTATTGTGCAGTAACGGAGAATAAACCAAGTAGATATCAGAAAGCACCACGATGAAAATAACGACGGAAATATTATTAGTGGTTTTTGCCGTGGTCCTTCRAGTTAACTCAGAAGCCAATATAAAAACGGAAGAGGGCGTTTTAGTTTTGACCGGTGACAATTTCAAGACTGCCATTGCCGATAATGAGTTTATACTCGTCGAATTTTATGCACCATGGTGTGGTCATTGTAAAGCATTAGCTCCCGAATATGCAAAGGCTGCCCAACAATTAGCTTCTGAAGAGTCAGCTATTAAATTAGGTAAA…	yes	contig17278	OtL008-G07			13.2649	-1.31418	-2.08567	2	814	Non-Horn
contig17280_a423	GGCTCGGACAGGTGTAGAAGTGGTGTGGTTTGTGTATACGTATACGCAGCCCGATAAACATCATCAAAAACCCCATCATGCAGACGATTAAATGTGTCGTCGTCGGTGACGGAGCCGTTGGTAAAACCTGCCTTTTAATAAGTTATACAACAAATAAATTTCCTTCCGAATATGTACCAACTGTGTTCGATAATTATGCAGTTACTGTTATGATTGGTGGAGAACCCTACACATTAGGTTTATTTGATACAGCAGGTCAAGAAGATTATGATAGGTTACGGCCGTTAAGTYACCCCCAAACTGATGTTTTTTTGGTGTGTTTTTCTGTTGTAAGTCCCTCATCGTATGAAAACGTCAAAGAAAAATGGGTACCGGAAATAACGCATCACTGTCAAAAAA…	yes	contig17280	OtP012-F06			11.686	-2.09842	-1.78789	4	1120	Non-Horn
contig17284_a424	AGACATGTCGCGGAAGCACTGCGGTCAATTTTTATTATTAAAATAAAAACAAAATAATAAACGCCATTATATACGAACGCGGTAACAAATTCTAACAGTTATTAATCACATTCAATAGCGTGGGTCCCTTTCGATTAAGGCAGGGATGAACACAAATGACAGGTAGTCGCAACAGTCTAGTAGTACAGTGAAAAATAGCGGAGGCCGACCTATTTTTTTAATTTTAATTGACGAACTTTAAACCGATCGTCTTTCCGTACGCGTTTTGCATCAGTCTTCTTAACTCCCGCAACTTTCTAACGCGCGTTTCTAGCTTGAATTCTTCACCAACGTTTCGACAATGCTCAGTTGACCAACTTTTTTCACTATTTAAATCTGAACTACGTAAGCTCCCAGTTC…	yes	contig17284	OtL006-H04			8.93266	-3.47277	-3.73608	1	717	Non-Horn
contig17389_a425	ATTCCGGCAAAAAATGCACGTTTATTAATGTGAATAAAGCGAAAATGATGCTTAATAACGACGTTATTTTCCAATGGAAAAAATAACNTAAGGAATAAGTTAAAAGTATCCCGAACGAGGCTGAGACGGGTCCTAAAGCTTGAAACGTGCCTCGAGTCGAGGCAGTTGAGATTTCTGATACGTAAGTGTAACTCGCAGTCGCCATTCCGGCTGCTATCCCTGTTATGAGTCTTCCGATGTATAATATGTGGATGTTTTCCGATAAACTTACGCAAATCCATCCGATTATGAACGGGATTGAGCTAAATTGGATTGAAATTTTTCTTCCGAACCATTCGGCGATTAAACCGGARAGGATTGAGCCGATTGGGTTTGTTATAGCACCAAAACTAGCCAGCC…	yes	contig17389	OtL002-D01			10.9492	-2.93105	-1.41779	4	715	Non-Horn
contig17426_a426	GGATTGATAAACTGTCAGTAAACGTCTTTGGAAATGGAAGTGCGAAGTTTTAATAATCATTGTTCATTGAGGAGTTTTTCGTTCGAATTCACGCCCGAGGTATCCGTCCCGTCGAAAAAAACGAGGCAGTTCGATTGACAGCGATTTGGCCGCTTTATCGCCGAAAATAGTCGTCCCAGATAATCGTGCGAACAGAGTCATCTGGCGTTTCCGGTGGGCATTCAGTTTCTGCCATTGGTACACGTGAATCGTGGTCATATTTCGGAGAATACTCCAAGATCCGAGGTCGTCCAGTATGGATTCTTGGGACGACGATAATTTCGAGCCCCAAGTGGTGATGCCTATTACCATTGCTTCTAACAAATGGGAAGGTGAAGATGAGGATGAGGATGTGAAGGA…	yes	contig17426	OtL019-C12			10.3137	-2.20283	-2.60039	0	1231	Non-Horn
contig17459_a427	GAATTGTCAAAGGATTTTATTCTTTTAATGTAAACAATGATTCTCGTTAGGTATTCAGGCTTTGATCATCCGCCGCTTTCATTTTATGACGYGTTTTTATAGAAACCACTTTATTATTTATGCAAATGCAAAAGTAGAATTTAAAAACAAAAAAGAATTAAGTGGTAACATTTTTTTTTTAATTAGAATTCGTTGCTTTTAACCCATCCAATCCAACCTCCTTCATAATGACGAACATTTTTAAATCCCAAATTTTTAGCTAAATCTAAAGCTTGTTTACTTCGGTTTCCTGTTCTACAAGTAAAAACTAATTCTGTTTCAAAATTAGGTCGAGTTTTTCCRTAATTAATATTGAAATCTTCATTTGACATTTCTTCTAAGACATATTTTAAGGTTTTC…	yes	contig17459	OtP004-F05			9.27406	-1.91089	-2.06391	3	573	Non-Horn
contig17482_a428	AAAGATAATCCAGTACCTGCTTGCCATGGAGGTAACATTTTTGGGGGTAAAGGAGGAGCACCACTTCCAGGTTGTCCAGARGATGGCATGGGGGGTAATGGGGGTTGAGTATTGGAAGTTGGTGGCGCGGGAGGGGCACCTGGAGGAAGTGGAGGTTGGACTGGGGGTAGAGGAGGTGGGGGAATTCCTGCTGGAAAAGCTGTTGGTGGTGGAACAGGAGGTGGTGGTGGCGGTTGCATATTTGCTGGAGTTGGAGGAGGGGGCGGCATCATCCCAGCTAGCATAACAGGTGGTGGCGGAGGCGCCATAGCCATTCCAGGGGGCATCATC	yes	contig17482	OtP001-A06			14.0259	-0.355364	-1.25913	4	330	Non-Horn
contig17513_a429	CTTTATAATAAAATTTATTTCAAACTAATTTTTTTATTCGTTGATTTCCCAWGGYTTTTCTRGTCGGTGTTGATCCCATGGTTTAYTGGGTTTATATTGATCCGRCTCTTTTAAAACAACCCCRTTATCACTCAAAGTCTTTAAAAACCCCGCTAATTTCTCCTGATTATCCCTCGGCTCGTAATCGCAATAAAACTCGATTATTCCACACTCCAAGCATCGTTGAGCTAAAACTCGGGCTAAATTAACGTAAGCTGAGTAATCAGTGAGGCTATAAAGCTGTTTTTGTAAAGCCCATTCTTTAGTGGTGGCTTTTAAAACGACTCCGTTTGTGAAATGAGATATCGTTGCTGTTATATGTCTCCGATTAACCGAAATTTCCAATTTGTGCCAGWAATT…	yes	contig17513	OtP009-C06			9.34807	-2.16367	-2.67324	0	628	Non-Horn
contig17757_a430	GTTCCGCAACTACCAGTTTAGATGGCGATACTAAAGGATCATTAAGCAGATTTTGTTCTGGAAGTTATAGAAGCGGTGAGATTCAAACTCAATACTCAAGTTCAACGGATGAAGGAGTTGAAACGGATGTGGAAGATCACACCCCCAGATTAAGTTACGCATCTTCGAGTTCATCGAGCGGCGTTGCGGCAAATTTTAACGCMTCCAAAARTCCTTTCACAAAACCTTAGTTGTGACAGTAACTTTGAAAGCTTAGAATATCCTCTTTCAGAGTCGAGCGAGCTCACAAGTAGTTTGCCTAGTTGCACAACTCAGGAACGTACACTTCCAGAGCCTGTTTTAACGAGTTCCAGTGCGATTTCATCACCTATTCCTGGATATTCAATAAACGCTAGAGCG…	yes	contig17757	OtL014-G07			9.95978	-1.61012	-1.32268	4	1156	Non-Horn
contig17814_a431	TTTTACTTTAAGTATTACTTTGGTCACATTTTGATTAAATGAGATAAAGAAACATGTAATTTTAATACTTAAATATCAAAAAAAAAAAAACTTTTGTAAATTAAATTAAGATAGAGACTTAGAATGTGGAAATTAAAAAAAAATACTTTTGCCTATTAATAATAATAATAGCGACATAACATTTAGATAGCTAAACCGTACACAGATACGATGCAAAACATGGTTTTATTCTCCCAACGTACAGTGCAGCTTCCGTCTGTGTTGTTGTCCCAATAACAAGAACTCGCCGTATGCAATCCAGCCCCATTTTTCTGCATTATAGTGCAAGTGACAATGTATTTGTAAGGTTTCATTAGTTTAGTTAATGCTGATGTGCATGCTTCRACTACAGCCGTGGTC…	yes	contig17814	OtL004-A09			9.34692	-2.06898	-2.11948	1	632	Non-Horn
contig17836_a432	GAGTTCGGCGTTGATTAGTTTTAATTCACCGAACGATTAAAATTCGTTAAAACAAACGGTTTTTGATCGAATATATTATTGAAAACATTCTATTTCAAATTGAAATGTGAAAAAATCGAATTTTTTGCAAGTCACCAGAATCTACGTAAAAGTGGGTTGGCTAACTTGATCAAAAAAATAAACCTTTCAACTTTTCACGTCAGATAACTTSACTGTAAATTACAAAGTGTGAAAGTCAGTCAGTTAAAAAAAAAATTTCATTTCTTTCCAAAAACATTAGACGCCCATTCAAAATCCATTTCGCGCCCTCACGTCTTTTATGTTATGATAGCTCAATTATAACAACCGTAATGRCCAACATCGCTGCGCAAAGAATCCAACGTGAGTTTAAAGAGGTTA…	yes	contig17836	OtL016-E12			9.97262	-2.35378	-2.75361	3	1294	Non-Horn
contig17865_a433	TGAAAAAAGTATCCTTCTATTCTCCAAAAAGTATCTGGATTGAATCTCTGTATAGGAGACAACATAATCATCCATATTACGTATGTAGGAATGCAATATGCGTTATTTACTAATATAAAACACAACCGAAAGATTGCCTTAGGAATTACATACCAATTTTCTAAATAAAACCTTATGCTATCCATTMTAAGATAGATTTACGAGTTGTACATCGARCATGCGACGAATTGGACATTTATTTAAGAAAAACCGTACGTTTTTGATCGGTTCCCGCACAATAATCGATATCCCGAACGGTTAAAATGTAAACAAAAATAATTCGTGAGACTCACGGTTTTTTTGTGGGATCATTTCTACCGGAACTTTCAACTCTGATCATTCAGGAATGATTCAAACCGA…	yes	contig17865	OtP007-H09			10.7018	-1.84236	-1.84893	3	731	Non-Horn
contig17882_a434	GTAACCCCATCGGCTCTCCACATCAACAAATCTGTTGGCAACGCATTCGCGTCCCATCATACAACATCTAGGGGTTTCTGAGAATTCCGTCGCTGGTTTTGGATTTAAAGTAAAGTATAAAAATAATTGGACGATTTGAGCATCTGTTAAAAATCCACTTTGTGCCGGACCGGATGCGAATTCTTCAACACTCATTAAGGGATATCTTAGAAGATTAATGCATGGTCCTAAACGATCAGCCATTGTAGATTGTTTCGCTTGCCAATTGTACCCGTTAACGGGAGAACCATCCAAAGCAGAAAAACCAGCCATCAGTCTCCTTTCATCATCTTGGTACCGCTGCTTTTTCTGCGAATCTTTAGTGCGRTTCTGCGGAACGTCGTCGTCGTCCTCAAAGTT…	yes	contig17882	OtL015-H03			9.46164	-2.07081	-2.20005	3	570	Non-Horn
contig17896_a435	TACCCAGAAAGTCATCATTCCTCTTCTTTGGCTTTAGCACCTTCAACACCGAGGGCAGTCAGCCAAGAAGATATAACGCGGGACGTGAGGACTGTCGTTTTGCAAAAAGGCAATTCCGGCCTCGGATTTAACATCGTCGGCGGCGAGGATGGCGAAGGAATCTTCATATCGTTTATACTCGCCGGGGGTCCCGCCGATTTAAGCGGCGAATTAAAACGAGGAGATCAAATTTTAAGCGTTAACGGGGTWAATTTAAGGAACGCTACTCATGAAGAGGCTGCATTAGCACTCAAGGGTACAAATCAAACCGTAACAATAGTTGTCCAGTACAGACCTGAAGAATATAATCGGTTCGAAGCGAAAATACACGATTTGAAACAGCAATTAGCACAGCAAGTT…	yes	contig17896	OtL006-A05			10.7799	-0.666742	-1.54215	3	851	Non-Horn
contig17947_a436	CGGGATGTTGTCGTTATAACGCTTGTTGCCCACGCCGGTTGCAATAACGAACTGTTATTTTTGTAGGGACACGCCGTTGGCGACGCCGACACGTGAGGTGACGGTTCTACCCTCATTATGTAGTTGTGGATGGTATCTGTCCTCTTCATCTGTTCAGCCGTCATCCTCGGCCCTTCCATTAAACTCTTCGCCAGCGTCGAATGCGTACTCGATAAACTGGATTGAGACGTCGACGCCAGCTGGTTATGAAGTGGGGATTGTTGTGAAACCACCACGATGGGCTCGGCTTCAGCCGAATCTTTGTTTCTTAACGCTCTGAATTTTTTATGCGGTTTATAAGCTTCATCCATTAATGAATTTGTATCGTATAAAGGTGGTGCCTGCAGCACCCTTTTCAAT…	yes	contig17947	OtP009-C08			9.99512	-1.32345	-1.61935	3	792	Non-Horn
contig18117_a437	TCCATTTGTATCCNTGGTAAATTAAGCTCTATACTTGAAAGCTCGGATTTGAGCTCAATAGCAGTTACATCTATTAGTGAAATTGAATTTGGTTTGGAAGGTGTGCATAGGTTTTTTCTAATATTGAAGTGGTTATGCCAATTTTGATTTGGTACTCCACCACCAGTTGTTTTCTTTAATTTAGATTTCCACTTTAGTATTTGGAACTTATTTTCAATTATTTTATGATTGTCCTTCCCGTAATGATTTAAGCCAGCTCGTCTATCGCCGTRCTGGTACACTGACGAGATAATCCACTCGTTGTCATAAAAAGCTTTCCCTATATATCTTGGAACTTCYTGCTCATAACCAGCCGGAACGAGTTTATTTAATAAATCTCCTTGTATAGCTTTAACACTA…	yes	contig18117	OtP019-B05			8.0529	-2.05581	-2.43421	3	725	Non-Horn
contig18150_b882	CGRYMGSCKAAGCGCACGGTTAACAGACGGCAAAGGTCGTTCGTTTTTTTKAGTGTCGAGTTCGCGTTGTTTGTTCGCGGTTATGATGGCTTTAAATAAGTTAAGTTTCGAGTGTTTAAGAAGTGTAAAAAATGGATTATTTAAAGATGCGAGGGTATTACAGGTAGCTAGGGTTAAAATGAGTCATTTTACGTATATGCCCGACGCAAAACCACCTGTTGGAGGTGAAATGTTAAAAATGAATATGTTCCAAGCGATTAATAATGCTTTAGATTTAGCATTAAAAACGGACGATTCAGCGATTATTTTTGGCGAGGATGTAGCTTTTGGAGGGGTTTTTAGATGTTCAATAGGTTTACAAAAGAAATATGGTCCGGAGAGGGTGTTCAATACCCCATT…	yes	contig18150	OtL012-B11	OtL012-H05		8.81887	-2.00835	-2.07803	3.5	1247	Non-Horn
contig18254_a438	GGAATGTAATGKCACTTTGACAGCTATGACTTTACCCATACGTTTTGTTATCGTACGCAAATTATTGTTGCACTGATGTGGCCAAAAGATACTATAATAGTATAATAGTGGGGAGCAATGTTGTTTAAAAGAGGCTAATTACAAATAAGTATACCTAAATATTAACGAAGATCCCTCGAGGTAAAGCAACACATAAAAATATAATAAACCATGGCTTTTCGTTCATTTAGATCAGAATATATGCAAATACCGCCTGTGACGAGAGTTTACACGACGGCATGTGTCCTAACAACTTTAGCGGTCCAATTGGACTTGGTAACGCCATTTCAATTGTATTTCAACCCAATTTCGATTTTGAGACAGGGTCAAGTTCATCGATTAGTTACAGCGTTTCTATTT…	yes	contig18254	contig_245			10.3935	-2.57267	-2.44885	3	1093	Non-Horn
contig18300_a439	GGATCACTACCAGTTCCTGTCGGCACACTCCATTTTAACKGCTGGGTTAAACGTTGAAAATGTCGCTTCTATCRGCTCGTCTCGCCGCCTCAGTGGCCAGGCGTTTACCTAACACCGTTTCCCAAGCCGTTGGTGTAGCTTTCCCAGCAGTATCAGTAGCTGCCCGCAAGATCCATGTTTCCGGTGCCCAAAATRGAGCGGAAATCAGTTCGATCCTCGAAGAGCGCATTCTCGGCTCAGCACCGAAAGCTGATTTGGAAGAAACCGGCCGTGTACTCAGCATTGGTGACGGTATTGCTCGCGTTTATGGTTTGAAAAACATCCAAGCTGATGAGATGGTAGAATTCTCATCCGGTCTTAAAGGCATGGCCTTGAATTTGGAAGTMGATAACGTTGGTG…	yes	contig18300	contig_104			11.312	-2.41138	-2.27739	2	2012	Non-Horn
contig18344_a440	GGTACGAAGCATGTTGTTAGCGCTACAAAATTATCCGTGTTTAATGGAAAAATTGAAACGAACTCGGGCGGAAGTTTTGGAATTTTTATTGGGGTTTTGCGATTTGGAGGAAAAGGTGGAGTTATTTACACCCGCTTTGGGGTGCGTTTCGAATTTTTTGGCTAATTTGAGTTTGGACGAATTGAAAAGTTTGAATTTATCAATGGTGTACAAATGTTTGGCTTACGGAGTTTCAGAAAAAAGTCCGAGTCACTTAAAGATTGCGGTTGCAAGATTTTTCGTTGCCAATCGACGAATATTTATGGAGAAAGAGTTTTTTAGGAATAATTACGATGTGATACATTTATGGGAGATGGTGATGTTTCTGTTAGATGATGATGATGAGGATGTTAGAAATGC…	yes	contig18344	OtP010-C10			8.42935	-2.14265	-1.31176	3	1282	Non-Horn
contig18361_a441	GAGCAAGGGTTATCACAATTTATATCGAGGTCACAGTACAAAAATAAAAAGAGAACCTTGGGTTTTTTGCACGTCTTTATTTAATTGGGAAATCCCGCTGTAGTTATTAAACATACAAATAAAGTTAATTCCTTAATCTTTTCTTATTKAGTCTTCGTTAAAAGTTCTTGAAGTGAAGTTCATTGATTTAAAGAAGAATGCATTTTCAAAGCGTTATTATTTTGGTGGTTTTATGCGGAGTTTTTGAGTCAAATCAGTCAAGACCTGATTGCCCAAGGATTTTGTATAAAGCCGATTGGGGTGGAAGAGCCGCTAAAGGAGTCGAACATACAATAATCCCAGTTAAATATGTTATTATTCATCACACAGTGACACCGTCATGTTCAACGGAAGAAATTT…	yes	contig18361	OtP010-E03			11.244	-1.09032	-2.09861	4	1342	Non-Horn
contig18415_a442	AATTAAACAATGTCTTTTTTTATTTAATAACAATATTTACATAAAAAACAAACTCTAAATCTAAAATCTCCCCAAAAAAAAATTTTTCATTTATTTATTTTTCTCTTTAGTTTCTTTTGAAGGTTCTTCTGCTCCAAGTAAAGCACTTTCAATTCCCGCTTTTTTTAGCTCATCTATTAAATCCCCAGATTGATGCATTTGTAGAAGGATGTCGCAACCTCCAACAAACTCYCCATTAATAAAAACTTGAGGAATTGTTGGCCAATTTGAATAATCTTTAATACCTTGTCGAAGTGTTTCATCTTGTAAAACGTCGTGTGAATCGTAAGTAACCCCATGCATACGTAAGATTTGGACCACAGCGTTGCTAAAACCGCATCTTGGAGAGTCTGGGACCCC…	yes	contig18415	OtP017-G04			10.1449	-1.97668	-1.84478	3	579	Non-Horn
contig18566_a443	GGAGTCAAGCGAAGAGATGAATTTAAGCAAGTGCGGTTTTAAAGTGTTCAAATACGGTGTTTTAAGAAGTACAAGTGCGTGCGTTAATTTGAATCGAAGATACGGGGATTTAWCRTCGACGCAAAATGTTGTTTCTTCCGGAAAGAAACCCGATTGGAATCGGGCTGTTAGCGAAGCAGAAAAAATCGTGGGGTATCCGACTTCCTTTTTAAGTTTAAGGTGGTTACTTAGCGATGAAATTGCTAATATCGCTTTGCATTTAAGGAAATTGATTGGTTCAAATCATCCTTTATTAAAAACCGCAAAGGGATTAATCTACAATGGTAAAAACAATACTCAAGCATGGGGATTAATWGTTCTTTTAATATCAAAAGCAGCTGGTCACACTTCGGATATTCC…	yes	contig18566	OtL016-B08			8.77283	-1.20456	-1.98734	2	1234	Non-Horn
contig18582_b883	GRMCCAACTAGACGTCAGCCATGACAGTTGGTGTTCCATTGTAACGTTCCGTTTTAAAGTGCGTGTTTTTTCCAGTTTTCGTAACACAACGGTGCGATTTTTGTTTGAAAATCGCCGAAAATGGGTAGGAAGAAAAAGAAGCAATCGAAACCGTGGTGTTGGTATTGTAATAGGGAGTTTGAGGACGAAAAGATACTGATCCAACACCAAAAAGCCAAACATTTCAAATGTCACATTTGCCATAAAAAATTGTACACCGGACCTGGTCTCTCTATACATTGCATGCAAGTTCACAAGGAAGCCATAGATAAAGTTCCGAATTCACTGCCCAATAGATCTAACATCGAAATTGAAATCTATGGAATGGAAGGAATTCCACCAAATGATCTGAAAGAACAT…	yes	contig18582	contig_370	OtL010-D11		9.8398	-2.25607	-3.10782	2	1104	Non-Horn
contig18711_a444	TTTATTTTAGATTTAATTTTAAGGTTGGTTATGGTATTAATTATAGTAGTTATAGTCTTAGTTGGATTAGCTTTTTTGACTTTAATAGAACGTAAAGTTTTAGGTTATATTCAAATTCGTAAGGGCCCTAATAAGGTTGGATTTATGGGAATTTTGCAGCCTTTTAGAGATGGGATTAAATTATTTACTAAGGAACAAACATTTCCTTATATAGCTTAATTTTTTTATTTATTATTTATCTCCGGTAATAAGATTATTTCTATCTTTAATGTTATGATTGTGTGTTCCTTTTATGACATTTTTATTTAGATTTAATTTGGGTATTTTATATTTTTTATGTTGTTCTAGATTAGGTGTTTATACAATTATGATAGCAGGTTGATCGTCAAATTCAAATTA…	yes	contig18711	contig_26			12.4298	-2.93869	-1.21687	4	815	Non-Horn
contig18749_a445	TAGTGTAGACGATTGTCCCAGTTCATTTGCATAACTCATTGAGTTTCGGATTTTTTGAGGAGGGACATTTATTATACTGTTTAAAAAATTTGTATAATAAAATCACAAAGAATCATCTTAAAATTGCTTTACCTAACTCGTAACGAACAACTTGATATTTTTCTTTCGTTTCGTGAGACCATGATTTACGTTGTTTGTAATAAATTTTCTGATTTCGAGTACTAGGCACGCGTGAGCCGGAGTTTGTGAGCACCGGAAATGATGATATATTGGGGTTAGTAAGGTGGGGTCTGCGTTGCTTGCTTACTAAGCAAAAGATATTTCGCTTCGTAGGTAACTGAAATGTCCTACTAGCAAAGAAAAAGCGCACAGAGAAACATTTCTAGTAAGCCMAAGCGA…	yes	contig18749	OtP014-F05			8.41995	-0.994446	-1.32688	4	1320	Non-Horn
contig18839_a446	GGTGCATTATTTTTTATTATAAAAATACAGTTACTAAATTAAGAATTAAAAAAATACTTATACACTTAATTATAGTATCAAATGAATTTTTCATCAAAAAAAAATTAATATAAAGACAARARAAAAATGAATTGCAGCTATTCTACTACGGCGAAAGATTGACCAGTACAAGCAAAAGCCAATTTGACTTTGCGATTAACCAGCACTTGGGTGGGTTTCATCACATTGTTAGTATCACCTGTACCACAGCTTCCATGTTCGTTCCATCCCCAACTGAACAACTTTCCATCTTTAGTAACAGCTAAAGAATGCTCAGAACCTAAACTCAATTGCTTTACATCTTTGAAGTTTGGTATTTTTTCCGGCTTGTGTGCAACAGTCTTTTGGAAACCCAACTGT…	yes	contig18839	contig_161			10.4077	-2.66156	-2.86019	4	1337	Non-Horn
contig18883_a447	GRSACACGTAAACATGACAGTTAATTAACCTCTTTATATCATCGGATTTATGTTTTACTTTTTTAAGCAAGAATATCAAAAAAATAATGGAGGAAGATTACGAAGAGCGTCATTGGGACGGTGGTGATGTTATGGATGAAGAGTCGGAAGGTTGTGATGATAATTTAGAAAATCCTGAACTAGTYTTAGCAGAATGCGCGGAAAAATTTTCTACTCCCGATTATATAATGGAACCTGGTATATTTTCCCAATTAAAACGTTATTTTCAATCGGGTGGTAACCCAGTTCAAGTCATTGAACAATTATCTCACAATTACACAGCCGTTGCTCAAATGGCCAATTTAATTGCGGAGTGGTTAATTATAGGAGGTGTTAAAGTGACAGATGTCCAGGCTATGG…	yes	contig18883	OtP008-H03			9.11068	-2.21181	-2.26654	1	974	Non-Horn
contig18929_a448	GTTTGTTTTCGATGCAAATAAAATAACGTTGACAATCATTGGGCGATCGGAAATATTTGTATTCAGATGGGGCGAATGTTTTTGCTTCTGGGGGGCAAGTAAATCCTAAGAAGGCTTCAGCATTACAAGATTGAACTTGATCGGGCCAATCACATCTATAACTTTCTTCGYTAAAAGCCAACCCTTCCGGACAATCGAAAGTAAAAGCTCTTCCTKCGACGCAATTTTTGAATTGGCCGCAATTTGCTTCGTCACCGATTTTATAATAACCGTATTGATGAGGACAATCTTCAGTTGGTTGAGCTGGTTGTGTTGTTGTTCGTCCAACGCAATCAACATCGATGGGATATTGACAAGGAAAAGCCAAAGGATTCGTTAAAGCGTTAAAAAGGAGACCGT…	yes	contig18929	contig_90			11.416	-0.442254	-1.70652	4	686	Non-Horn
contig18975_a449	GGTCTTAAAATTCTTTAGCAGAGCTCGTTCGAGGTGCTTTTTTTTAATCAGTTAAAACAAATTTTTGTATGAGTCAAAAGGTAGAAAAACCAGTTCTATCCGGTCAACGCATCAAGACCAGAAAAAGAGATGAAAAAGAAAAGTACGATCCAGTTGGATTTAGAGATGCAATAATCACTGGTCTGGATAAGTGCGCTAAGGATTTTGAAGCAATCTCTCGTTACCTGGAYGGTGCAGGCAGCAAGTTAGATTATCGACGCTATGGGGAGAACCTCTTTGACATACTTATTGCTGGAGGCATATTGGTGCCAGGAGGCACGCTCAATTTGGAGGGCGAAATCTCCRAAACGGATGCGTGCATCTTTAACACTCCGGACGAGATCAACATTGATGTGATGA…	yes	contig18975	OtL009-D12			8.6065	-1.81021	-2.72097	3	863	Non-Horn
contig18997_a450	GGATTGAATTAGACAGTTACCTGACAAATAATCCGTTCAAAATAATTTTTGATCAATTCTTTTATATCTTCCAAAATTAAATGTTAAATTAATAATGAACGGTTTAATTAAATCAACATTTAAAAGCATTTAAAATTAAGCGCGATGCGTTAGATCATGTTTACCACCGACAGAGGGCGCACTTTGTATATAAAGAGACGACGCGTGCTCTCGCGGATTSAGTGCGAAACCAGCTTCTAAAGCAAGTCAAGTTTTCAACCTAACCTAATAAAAAAAACCAATTCTAACTTCCATATTTTGTTCCTTATTATAAAAAGAGTCATGGCAAGTGTTTATGGTGTAGGCGTTATGAATCGCTACGAACTTTTCGTGGATGACGAATCGGACCCTCTCGATGTG…	yes	contig18997	contig_182			10.7315	-1.62982	-1.92265	4	1389	Non-Horn
contig19059_a451	TACAAAATTAAACGAATTATATTTAGATCATAACAAAATTTCTTTCGTTGGAAATCAAACTTTTAACGCAATGAAAGAATTGGAAATTTTAAAACTCGACGATAACGAAATCGTTAACTTCAACAACCCCTTCGATAAATTAAAAGAAACCGAAGCAAAACCCAAAATCACTTTGGATGGGAATAAATGGAGTTGCGAATGCGAGAATTTACTCAAATTAGAATCGTGGTTAAAAGAAAACGTCGAAACGAATCCCGATAAACATCTTTGCCGAAAATCGTAARGAAACGGTCGCCGAAGTTWTGCACAAATGCGATAATGATGTTAACGCTGTSGCGACTGTTATGCAAAAGAAAATTTTAACCAACAACATCTTATTGGGGGGAAATTACATTCCTT…	yes	contig19059	OtP007-C08			9.19568	-0.742516	-0.999187	3	734	Horn
contig19105_a452	ACTCTGCAATAACCCTGACGGCGCAAACTCTCTCTAAATATTGTTCTAATCCTCTCCGGCGTGCATCTAATTGTTGTTCACTGAGTGTAAACGGCCATTTTCCGGGTAATTTGGGAAAATTAAAACCTATAAATTCCTTTTTTAAATCGTTATGAAGTTTTGCGAATTCTCGATACCTTCTCGAGCACAAATGTCTACCAGCCATGTAAATATTGAAAGCCACGTAGCGTTCACCACCTCGTTCATTGTAATTATAATCAGGAATGCTTATTGGAAGAGATCTTTTYTCACTGTAATCGATGTAAGAGTAACCCTGAGTGTCATCGGTTGGTTCTAAACGTTCAGCTTCCTGTTGTGTTACTGAAATAACGGTTAAAGTTAAAACATCACCTCCAGATT…	yes	contig19105	OtP004-A09			9.48271	-1.29358	-1.44584	3	746	Non-Horn
contig19108_a453	GATTATGAAAGAAGGACAAATCGCTGCAGTTTGTTACGAAGTTTTACAAGCGATTAAGTATTTACATTCAAAAGGTGTAATTCATCGTGATATTAAATCGGATAATGTTTTATTGGGGATGGATGGTTCTGTTAAAGTTACCGATTTTGGTTTTTGYGCGAATATCACTGGCGATGAACAAARAARTTACCRKGGTTGGTACCCCATATTGGATGGCACCAGAAGTTGTTAATCGTTATAAATACGGTAAAAAAGTCGATATTTGGTCTTTAGGCATTATGGCGATTGAAATGATCGATGGTGAACCCCCATATTTAAAAGAACCCCCGTTAAGAGCGTTGTATTTAATCGCAGCAAACGGGAGGCCAAAAGTTACCAGATGGAACGATTTATCAAGTA…	yes	contig19108	OtL011-E07			10.403	-2.52288	-2.06751	3	696	Non-Horn
contig19140_a454	GGATTAATTAATCATGACTTAAAAGAAAATGGTGATCAGGTTGCTGTGACTCAAACAAATAAATTTGAGTTTGTAGAAATGTACGCAGATTTCCTATTAAATAAATCAGTCGAAAAACAATTTCGTGCCTTTTATAAAGGCTTCCAAATGGTAACTGATGAGTCACCATTAGAGTTACTGTTCCGTCCGGAAGAAGTCSAATTATTAATATGTGGTAGTAAAACGTTCAATTTCAACAGTTTGGAGCAAGCAACGGAATACGACGGGGGATACACAAGTGATTCGCCGATCATTAAACATTTCTGGTCGGTCGTACACGCGTTCTCGATAGAAGAAAAACGAAAATTATTGCAATTTACGACCGGATCGGATCGAGTCCCGATCGGGGGATTGAGCAAA…	yes	contig19140	OtL019-B08			9.9763	-1.84526	-1.47823	3	695	Non-Horn
contig19169_a455	GGACTATGTTTCTGTTTTTTACGTTTCTTCTCCTTTTTTCGCTTCTTTCGTTCCTTATCCTCGTCGTGTCTTTTTTGTTTCTTATGTTTCTTTTCGTGAGTGTCCTGGCCGATTTCCGTAATGGGGGTTTCTTGACTTGGTATGCTACCGTCTTTGTACTTGTGCTTTTTATGTTTATTCTTGTGTTTCTTTATTGGGGTCTGATTTGCGTACCTAAATTGTTCAGGAAGAGGTCCTGGATGTAATCGAAAACCATCTARTTGTACACTGGTTAATGGTAACAATTCTTTTCCTCCGATTGGAGGTTTTTCAATGACAGACCTCAATGAACTATTATCGTTTTGTCCTGGAGTATCGATAACACCCGGAAGGGTTGGAAGGAAGCTTGATAGCTGCTCT…	yes	contig19169	OtL015-E10			9.37944	-1.5803	-2.30666	1	711	Non-Horn
contig19170_a456	GACAAAATATAACTGTCAAACGTSAAATAGAAGTGATTTTGCATTTTCTCCAACAAAACTCGTTTAAAACTCGATTTATAAACACAAAGTAAGCCGTTTTTTTGCTTAAATAGTTCGCAATTTTCCTCGATCATCATCGCGATATAAAAGAAATATTCTAAATTATAATTTTGGTGTAATTCTTTAAAGAAATGGATCGTCTTTTGAGGTTAGGTGGAGGAATGCCCGGTTTAGCCCAAGCTCCGCCGCCGAGCGATGCCCCCGTTGTTGATACAGCCGAGCAAGTTTACATCTCATCTTTGGCGTTATTAAAAATGTTAAAACACGGTCGAGCTGGTGTTCCAATGGAAGTTATGGGACTTATGCTTGGTGAATTTGTTGATGATTACACGGTGCGTG…	yes	contig19170	OtL015-B05			11.8869	-2.44707	-3.52912	3	1169	Non-Horn
contig19235_a457	ATTAACTCGAGCTCCGAACGAATGTTGTGGTGCGTTGTGCATAACTTTATCGGCATTTTCAATGTGACAAACGTTTGGTCCTGGCGTATCAACTGGTTTTTCAMCATTTGTTTTTAACCCAAATGTATATTTAGGAGCGGCATCTTTAATAGCTTTCTCAGCTTTATCAGGATCGTAATCGCCTGGAGCCGGAAAATTATCAATTTTTTGTTCTTTAGGTCTACTATGTAAACTTAAAGCCGGTGGTGTATCTTTTCCTTTAGCGCTAAGTCCTGTAACATTATATTGTCCGGGTCCCGGACCGACTCTTTCCACTTTTCCATTATGCCTGGCTCCAAAACTGAATGCGGGAGCTCTTCCCGAYTTTGATTCAAACGTTTTCTTGCCTATATATGTTGG…	yes	contig19235	OtL013-C03			9.93369	-0.743441	-1.11503	4	626	Non-Horn
contig19321_a458	CAAACGTTATTAGATATTACTGCACGGAACAAGACCGAATGTTTCGATACATCGCCCTTGAGCTGTGCCAGGCTACTTTACACGATTACATCCAGGGAAAATGCGAAAGAAATTTGAGTTCGTTACAAATCTTGTATCAGGCTACTTCAGGACTGGGACATTTGCATTCATTAGATATAGTTCATCGAGATATAAAACCCCAAAGTTTTATATCAATTCCTAATGCCAAAGGGAAGTTCGCGCGATGATCTCCGATTTTGGACTTTGCAAAAACTTCAAGTCGGTCGAGTATCGTTTTCGAGGAGATCTGGAGTTACAGGGACTGATGGGTGGATTGCTCCAGAAATGTTATGTAATACAAWWCGRMCGRMGTACGCAGTAGATTTATTCTCACTTGGT…	yes	contig19321	OtP004-E11			8.44947	-3.47181	-1.94639	0	1267	Non-Horn
contig19465_a459	GGAGATTGAACGTCTATTTCTAATTTAATTTTCAAGAAACTTATTTACAACCACAAAATAGATTATCCAAAATAACACGAGACACACATTGTTTAACCATCTATAAGTATCGTTATTATAATGTATTCAACTTAATTAGAATATAAAACTAATGGAAATATAAAAACTCAATTTGAAATTAGTAAATCGATAAATTCCAACACATAACTCTTTACTACTTTATTTAGCTTCAGTTTCAGGRGTTTCTTCTTCTTTAACTTCAGTTTCCATCGATYCATCTTCTTTACCATCATCCGCCAATTTCTTTTCGTCAACATTTTTCTCGCCAGTCTTGAATCTATCGTATCTCCCACCCACAAAGGAATCATCCTCATCTTCATCAGAACTTTTATTCCCTGA…	yes	contig19465	OtP012-H03			10.339	-2.41587	-1.70176	3	611	Non-Horn
contig19790_a460	ACGCAAATACACGAAATTATCATCTTAATATAACCTCTGTGGTGGTCCCATAGATGACTTTACATGTAAAGATCTAACATTTTGCCAATGTTTCTTWAAAAGGGACACCAAAAAGTTAATGGCTAAATGGACGTTTTGCACCAATTCATCTGGSGCCATTCCAACATGACCAACAGCAACAGACAAACAAAGTACTTTTTTCATTTGAAACTTAATTGTTGCTTTGACTTCATCAATTTTTTGAGTCATTGATTCTTGGTGGGACAACARCCCAGGGAACTTGCCAGCTTTATTCAAACCAGGTCCCAATAAACGAGGAATTTGCTTAATCAAAGCTTCTGATGCTAAAAATGCATCATATTTTTTTGCTAGTTTCTTCACCAACTTCTTGTTCTTATT…	yes	contig19790	contig_256			10.8066	-2.33939	-2.56772	3	726	Non-Horn
contig20315_a461	GGCATTATCATCAACGATTTATTCCTGGAGTGTTGCTCTCGATTACGAAACTAAACGTTTTATGTATTTTAGTTTCCAAAAATTACGGTTATAAGAAATTTTAAAAGCAGTCCAAGGCTAATTATTTAATTGAGTTATCATGACTGTAGAGCATCATCGCTGTAATTGTGATACAAGTGTTCGCGGTTAAAGCTTTTGGTGTTAACACGGTAATTTTTTATTCTTTTATTTGTGTTTTGAGGGATTACAAATATTTTAAATATATAAATCAAGAATGAACGACACGTTTACTACCTACGAAGAAGGTTCACAACATTCGTTTAGTATTGTAAACATTTTTATAATATTAACCGGCTTAACAAATATATTTGTAAATTGCTTAATTTTATACGGTTTGAT…	yes	contig20315	OtL015-F07			9.2143	-1.96925	-3.00584	3	996	Non-Horn
contig20474_a462	ATTCTAGGTAACAATAAAAATTTTATTTATACATCTTTTTTTCAAAAACATAGGAACAATACAATATTTTTTCTCTTTACAAAATATATTTTAAATAAAAAAAATCTATATAAAATTTTGGCGATACAAAAACATTCCTAAGATCAAAAAAAGAAAAAAAAACATGACATATATTAAAAATATTAAACGAAGGAATAAGTAGATATAAAATCTCGTGTGTAGTCCGTAATATAATATTTTATATTTCCCCCATATTTTTTTTGTCTTCTCAAATAACAAAACGTTCAAAAATAATTTATAAAAGAAGGTATAGAAAAAGAATACTGTTATCAAATAAAAAAAATATGAGGYGATTAAACTTTTTCACTTATCAAAAATTCTTTCACTTAACCTCTATAC…	yes	contig20474	OtL008-B08			10.198	-1.17437	-1.13815	3	792	Non-Horn
contig20640_a463	GAGGATAGGAAAGTGGTTCGTGCAGCCTCATACGGGCTCTAGGAAACCGACGGACGCCAGTTCGGTGCATCTATCGTTTTCGTTTGCGTTTTTCGTGCACGGCGATAGTTCCGTGTGCGCTAGCGTCGACGTCAGGCAACATCCGCCCGTTCGAAAACTATGCAAGAGCCACCTGCATCAGGCGCAGGCGTCCACGTCSGGTTTGGCAAGTTATTCTTGCCCCGTTTGGATTGGCGGGAACAATAACCGGACAGACGTTTAAAAATTGCGACAACGCTCGTCTTTTGGAAGATTGGGGACACTTTTTTCCTTTAGACAAAAATTATTTGCAATCTCCGACGGAGAATGGAGTCGTGGAGGTGATTGTTGGCGGGRTGAAGATGCGATATCCCTCGGGCT…	yes	contig20640	OtL013-C04			9.24433	-2.55562	-1.66031	2	620	Non-Horn
contig20746_a464	CAGGTGAGACCGAATTAATATCGAGGGACGTAACCAGAGTACACATTTCTTCGGCAACTAGAGAATTGGACGACCTAATGGCCTCACTATCCGACTTCAAGGTATCTCCAGGTAGTCCTCAACACCAAACGGTTACAGATCAACAGGAATACGCACGGCCTATTAAAGCAACTCAACAGAGCACAGCTCCACCTAAACAAAATTTGGATTCTATGCTTGGTAATCTTCAAGCAGACATGAGTCGTCAAGGAGTTAATACAAGTCAAAAAGGTTGTTGCAACGCTTGCGAAAAACCAATTGTTGGACAAGTTATTACTGCGCTGGGGAAAACATGGCATCCAGAACATTTTACATGTGCCCATTGTTCTCAAGAATTAGGAACGAGAAATTTCTTTGAAC…	yes	contig20746	OtL018-B07			11.4637	-1.20448	-2.5085	3	927	Non-Horn
contig20915_a465	GAGAGATAAAATAATTGTCACCGGCACTCACGGAGAARTTCTGCGAACGAAATAGGTCATTCTTTCTACGARTTAACTTACTTAACGTGTGTTAAGTTCTTATATTAAAAAAATGAACAATCTTGGCCTTTTAAAACCAAGACTCGCTGCTATATCTAATTTACGATTTATGACTCAATTGGGCGACTTAGGAAGTGGCGCTGGAAAAGGCGGTGGTGGTGGCGGTTCCATCAGACAAGCGGGTGGCGCATTTGGCAAAGCTGAGGCCGCCCATGAGGAAGAGTACTTCTATAAAAAGCAAAGAAAACAACTCGCGAAACTTAAAGAAGATTTACACGATGAGATTCATTTCCATGAGGAGCAAATTAAGAGACATCAAGAAGCGATTAATCGCCACAA…	yes	contig20915	contig_99			10.1373	-1.65174	-1.02738	3	564	Non-Horn
contig21008_b884	GATTTTTAAGAAAAGCTTCTTCAGCGGATTATTAACCAAGACATCAGCTGTTGAATTCATCTTTAATAACGCTTAAATTGGTCACTTTTTAGGACACAATCCATAAACTATTGAAACTGTATCAATTCTTATTAAAATTTTTGAAATTATTCTGGAGAAAGATAAAGCAGTTCATTTAAAAAAATCCAAAAAGCATCTGGTACATCAGTTTAAAACTTGGGCGGAAAGACACAAAAACGTTCACTTTCTAGACATGATGAGAAATTTTCATTGGAAAAAAAGAAATGTATCATATATAATAACGATATTTTTAGCACTTTATTTATTTTTTAGAAGAAAAACTTATGAGCATGAAGAAACTCTGCTATTAGAGAAAATAAAACCAGTTGATGTTTGGGA…	yes	contig21008	OtL004-A05	OtP018-E12		8.96764	-2.0174	-2.03524	3	813	Non-Horn
contig21071_a467	GCATTTGCCCTAGTACYTCTAATCGCGTTAGAACATGTTTTTTTAATACCAAATCTTCGTGGGAGAACACTTCGACTTTTGAGGGGATGAAAAAATGACGTTCCCAACAACAATAAGCGGAAGAGAAAATGTACAACCCACAGTGATACCACCTCAGACACCCACAAAAATGTCTAGTTTCATTTTTAATCCAACAATGTTTAAGAGGTTGATGCCTATATTTGCTTTTTTCATGGGTTTTGTAACTGTTTTGGTCGTTTTGTATATTTATATGAGAAATGCAGCGATGAGACATTACCAGTTTCAAGTTAATATGAGTAAGGATTATGAATTGTTGGAAGTTACTCAAGACAATCCCCAATTGATTGCTTAYATTAGACAAATGCATCTACAACCAGT…	yes	contig21071	contig_305			10.4243	-2.05107	-2.75468	3	1460	Non-Horn
contig21192_a468	CTTTSACTCACGGTCAAATGTCAAAATGTAATGTYGCTTTCACGTATAGCGCATTTTAAAATTTGTTTAGCARCAATTATTTAATAATAGTTTTATAATAACGGCTTAAATATTTATATGTGAATGTTAATTAAAAATCATGGAAGGAACTTTATGGAAATGGACAAATTACTGGRACGCGGTGTGGCAAACCARATGGTTTGTCTTGGAAAATGGTGTACTAACTTATTATAAATCTCAAGAGGAAGTTAATCAAGGATGCAAAGGATCAATTAAAGTACAAGCTTGTGAAATAAATGTGAATTATATTGATATTACAAGGATGGATTTAGTAATTCCTGGCGAACAACATATGTATTTAAGGGCCCCAACATCTCAAGAGCGACAAAAATGGCTTGT…	yes	contig21192	OtL011-F11			9.23591	-2.3654	-2.08245	1	792	Non-Horn
contig21313_b885	GACGTTTAAAACTACAAGTGCATTTGTCAAGAAAAGAGTTCTTCATTCGAGCGAAACCATAAGAAGAAGCGAGATTTAGAAAGATCTATTCGCAAAAATGAGGACGCTATTGATTACCTTATTATTTATTGGAAGCACAATATGTGCACCTCARCGACGACAAGATCATTACAAAGATGACGAATACGATCGTCCTCAACAGCCACAACAATCCCAACAATCCCAACAATATCAACAGCAACAATTCGAACCAAGACCTAAAGGTGAAACGACTACTTTCATTCCTATTATTAGATTCGAAAAGGAGCAAGGAGATGATGGCGCTTACAAAACAACTTGGGAAACTGGTAATAACATTTTAGCTCAAGAAGAAGGTTACTTGAAAAGTTTAGGTCCGGA…	yes	contig21313	OtL017-A07	OtL017-H03		10.8106	-0.58214	-0.876247	3	831	Non-Horn
contig21539_a469	AGTTGAGTCGAGCCCAAGTTGAATTTCTTCTCTACTCTACAACTAGTAGTTCTCTCAGTGTCGGAGAGAAGAAGAAAAAGAGAAGCGTACGTTGAGCAGGGCTCAGTTTCTCRGWTCTCGAGAGTTAATCGAGTCGCGAACACGCTTTGAAGTGATTCTTAATTTTTAATTTACATACTTCCGGGAACAAAAAGAATAAGTGAAGACGAAAAAGAAAAGYAAAAATTTTTTTAAAATGGATTGTTTTAATGATATTGAGGATTTTTATATAGTTTATGAACAAACTTAATTTTTTAAAGGTGATTTTTCGTGAATTTTTTTCTTTGCAAAGTTGATCACAAAATATAAATAACCATGAACACGCATTATCAAACTTTTTTAACTTGCTTCCTCTCAATA…	yes	contig21539	OtP016-B06			9.79522	-2.25576	-1.7654	1	1205	Non-Horn
contig21559_a470	TTAGTACTAAAATGACTGAGAAAGAACGTGATGTTGTCATCCCATTGATTATGAGGGGTTTCAAGGATTCCGCTTTGGAAGCTGGAACTTCTGTAACGGGAGGCCAAACTGTTGTTAATCCGTGGTGTACCATTGGAGGTGTTGCTTCTACTGTTTGTCAACCAAATGAGTATATTGTGCCTGATAATGCTGTTGTTGGCGATGTTTTGGTTTTAACAAAACCATTAGGAACACAGGTTGSKSYKRRTGCACATCAATGGTTAGATCAACCTGAACGTTGGAATCGTATAAAATTAGTTGTAAGTGAAGAAGATGTTCGTAAAGCGTATCATCGAGCAATGGATTCRATGGCTCGTTTAAATCGTATAGCGAGTCGATTGATGCATAAATACAACGCTC…	yes	contig21559	OtL007-C02			10.9784	-1.68921	-2.23151	3	920	Non-Horn
contig21611_b886	AACCAACTACGCATGCGTTAATAAACAAGTTTTTTTGRWARAAGCAACGTGCTCGAAATCCCAACGGTTATTTCTCGAACGTTGCATCAAAACAAGGTCGATTTTACTAAATAACAGGTTGATTATCCATTCGGGATGAGTACAACAACAGAAATCGAAGAGACAACGGCAAAGAAGAAACGATCTCCCGACGTTTATAAACGATTCCTGGAGGAAACACTAGAAAAAGTCGCCAGCAGCGTCAGTCATGAAAGATTTCACGACATTTTTCGACCATTAACATCTAATACGTGGGAAACTTACGAATGTTTTCAACAAGGAATTGTGAAAAGTATGCATAATGTTATCGATAGTTTATCAAAGAAAGGAAGTATTGATGAAAAAATTGATAAATTAAAG…	yes	contig21611	OtL008-C05	OtP012-E06		9.6907	-1.66186	-1.2628	3	684	Non-Horn
contig21621_a471	GGAGACTCTTCGGGTGCGCGTTGGTGTAAATACCTCCGCCACTATGATCCTGATGACGACAATCTTTTCGCTCTTGTGGTTTAGCACATTTGCCGCAAACACATCAACAGAAGTGAAGAACCTCATGGGAGAACCGGATTATCGTAAAGTACGTTTACGTTGGGACCTTGAACAACCACCAGCGGAAGGATTTCAAGTACGTTATTGTGAATTACAAGCGTGGGGAGCACAGAGATGTCGTTTAAAGAATATAGGTGAAGATGAAGGAAGAGTATTGAAAGATGARAAAATCGTTTTGTACGAAACAGATATTGACGGATTAAGAATGGCGACAACGTATACTTTCGAAGTAAGACCAACGAAAAAAGAAGGCAGAGAAGATCGATCCGAAGGTGGAGA…	yes	contig21621	OtP007-B07			11.5619	-1.20849	-1.45086	4	1270	Non-Horn
contig22014_a472	TATACAAACAATAAAAAGAATTCTGAAAAAATGTATTGAAAATAACGAAGATATTCATTTAGCATTACTGAGTTTGAGAAACACTCCAGTCTATGGAACTTATTCACCGTCTCAAATATTAATGTCCAGGTACCTAAGAGACAATTTAGTGTATAAAGAGAATTTGTTGCAACCTCGTGTAATAAACAAAAAGAAATTTAATGAGAAAATTAAGGYGAATCAGAAAATAGGACAAGAATACTATAACAAAAAGGTGGTTAGATTTARAAGGAAAATTTATATAAAAATGAAACAGTGTGGTATCAGGATAGACCAGGCAGTATATGGAAGAAGGGCAGAATTGTAAAACAAATTAGAAACAGAACCTTTCTTATTGAAAAAGAGGATGGAGGTAGTTTG…	yes	contig22014	OtP010-H03			8.28652	-1.5583	-1.65329	3	729	Non-Horn
contig22145_a473	CACAAGAAACTCATTGCCCAAAAAATTGCACCTTCTTCAACTCACAACCTTTAAAACTTCTCATATCAATATATTAATTAAAAATTACATGTATAACAATTAACAGCTTTTTATCTAAAAAAATATATCAAATCTATTTGGCTTTATAAATGCACATTAATTATTGTACATTCCATCAATAAGAAAATCCATTCTGCGATAATGTCTGTGTGACCACCATTCTTTTCCTCTTTTATATAAAATGTTAATAACAATAGCAACAACAGGCACTGATAATATCACTGCAACAATTGGAATAACAAAATCGGCCTTTGTTAATTTGTTCTTTGTGCCTTTGGAAGTATTCAATGCTKGGGAATTTATCTGAAGATCCATTCTTTGATTTTTGTTCTATTTGGC…	yes	contig22145	OtP016-A04			9.20221	-1.95852	-1.91321	2	1057	Non-Horn
contig22468_a474	CAGCCAAAACTTTCTCAACGGTTGGTTGCAAAATTCCAAMAAKWWMWWYMYWKWWWTCGTTAMMTWWWMRWWYYWTWRMTMSWMCYAAAGATTCATTTCCATCGAATAAATTCTGAAAGTCAAAAGTTGCTTCTTTTGGGTTAAATGTGACTTTTCCATTATCAACTTTATAATGTTCCAMTCCKTTTTTRTCAGTAAACGGTKTCAAGTAAGTTGWGTAAGTTACAAAAGCATTACCAAAATTAATGAACGATGGTCCATTTCCTTTAATATTTGTACCGAACAATTTGATGTCCATTTCATAATTACTCGAAGCATCCAATTTTTGTTCGACATATTTCAAAAGGAACTTTCCCGTTTSCTTATCAAAATCGACATCTTGTATTTTCATATTTTTGA…	yes	contig22468	OtL016-D05			9.50753	-2.57797	-2.57102	3	698	Non-Horn
contig22653_a475	TGAACTCAAAGATGTGTTTATTATAAAATTGAGCAGTAATGCAAAATCCCCAGAATCGACTAATATCGTAAATATACGTGTTGCATWGGTGAATGCTGATATAAACCAAGTCAACAAACTCACAGAATCTGCATTCTTTAATCTAACCATTTCTAAGAGTTGTACAACCTTAGATGATGCTCCAATAGGTGTACACATTGGCACTAAATAAGACAATACAGACATGGGAACTATGCCAAGAATAAAAGCTGCAGCAAACGTAAAATATATTCCTGCTCCAATTACAGCATAGATATTTAAATAGCCTTTAAAGTACATCACTAATAATATGAGCGAAAGATTTTGGATTAAAATTATTGGGTATTCCATATAAGTTAAAAGTGCATAACCATTTCGAAA…	yes	contig22653	OtL009-H11			11.6362	-1.92858	-1.47443	2	707	Non-Horn
contig22700_a476	GGCCGGGGGCATAGTTCAGTTTTCGACGTTGAACAGCTCGGTTTACAACACGTGTTTATACTTATTTGCAAGGTGATTTATATGTAATTATCCCGCGGTGATAATAGTTGTGAGACGACAAACACCAAATAGTTTGTGTTAAGTTAAGRCTAGAAAGTTGTAGTAGAAATATCCTACAATAGCACGGGATGCCGAATTCWACGGTTGGAASCGTCSCCCAATGCGGCATTGAATAAGACAATCCTGCCAAAGTATATGGACCTGCCAATTCCGGAAGGCAAAATTCAGGCCATGTACGTTTGGGTGGATGGAACGGGAGAAAATGTTAGAGCGAAAACCAGAACGTTGGATTTCATCCCCAAGGATCCCAGTGACCTTCCAATTTGGAATTACGACGGT…	yes	contig22700	OtP019-B01			10.9595	-1.09799	-0.78043	4	685	Non-Horn
contig22740_a477	AACGCTTCCGAACGTCCGCTTTACTTTCCGCCAGCTGCTTSGCTTCTCGTGCGGTACGACCTCGCTTGCTTAGTAAACTTTAGTTTTCGAATTTTTTGATTTGTTTGTGTGTCCCGCCTAGCCGTGTGTGTCGTTTCTCCGAACAAAACGGTACCGACGGCCCCTTTTCGCAACGAAATCGATCGCCAAGCAGTGAAGAGCGACCAAAAACAGCAGATAGGAATAGCTTTTTTTCAGTCGCAAAGCTTGTGATACGTCYCTGTTAATTACTCCAAAGATTTAAAAAAACACGCAAGGAA	yes	contig22740	OtP009-F08			10.4313	-0.824247	-1.09264	3	299	Non-Horn
contig23019_a478	CAATCACGATTGGGGATCGTACATTCGATGTTGAAGCCGATGATCTGGTGAAAACCGACGATTTAGGTCGAGGTGCTTATGGAATTGTAGAAAAAAATGCGACATGTTCCGAGTGATACAATTATGGCCGTTAAACGGATTACCGCCACGGTTAATACACAAGAACAAAAACGATTACTTATGGACTTGGATATTTCAATGAGAAGTAGCGATTGTCCGTACACCGTGCAATTTTATGGGGCACTATTTCGCGAGGGTGACGTTTGGATTTGTATGGAGGTTATGGACACGAGTTTGGATWMWTTTTAKAKCTAAASTTTAWMARMATAACYWRGAAAATAMYTGAGKWTMTTTTAGGTAAAATATCAATAGCTGTAGTTAGTGCTCTTCATTACCTTT…	yes	contig23019	OtL007-E09			9.27879	-2.36306	-3.18755	2	1004	Non-Horn
contig23036_a479	TTCGAAGAAGATGTTGGAGGATGCTTAAAAAGGGAATTTCTTGGGGGGTTTCAGCCACCTGTTTGAGAATTGCATAAAAAACATCTAAAGGCGAATTTAGATCAACCCCATGGGGACCTTGCATGCTTTGAGAATCGTCGCTTTCTCGTTGTTCGTCGAAAACATCCAATTGGACTGCTAATTCCGGTTCTGCCTCGGCACATTTTCGTAAGTTATTAAGAACAGGAAGCAGATGACATCCTRTAAATTCATTCCTCAATCTCGTCCTATCCGTTAATCTATGCGTTGAGATGATCAAACAGTTTATAAACGCGACTAAAGCAGTTTGATAATCAACAATTGTAGCATGATCGAGTTCTTTTACTATCAAACTCAATCTATATCGTTCACCTTTCAATT…	yes	contig23036	OtP010-C02			9.14598	-1.73825	-1.03218	4	900	Non-Horn
contig23112_a480	GTCAAATTATTTTTTAAGTTGCATTTATTGACTGGTCAGGCTGATAATAAATACAGCAAGATCATCAACATGTCAAAATGTTTAAACATTTTAATCAAAGAGACCGAATCCCATATCATCATCTTCAGATTCGGATTCCTCTTTCTTTTCTTCCTTGGCCGGAGCAGCAGCAGCGGCCGCTGGAGCTGCTGCAGAAGCAGCTGGAGCGGCGGCGGCAGCAAACTTACTTGGATCCTTGATGTATTCTTTAATTGTTGTAGCTTCTTTAAATTCAACATCTGTAACTGCAGCAAGAGCCAAAAGATTTTTGAATCCATTGGCAATGCTATGTGGAGCAGATGCAACAGTTGGATATCCAATGCTCAAACAGACTGAAGCCAAATTAGCAACGCCGACCAT…	yes	contig23112	contig_383			12.9125	-2.50077	-2.70564	4	1126	Non-Horn
contig23158_a481	GTGTGCGTGGACTATTTTSGTTTAGTTTCGTGGTGTGTCAAACATGACGATCTCAAATGAATTTGTATCAAATGCGGAAGACGTAGCCGACCAAGTGATTAGAAAAGGCAAATTTTTTTTTGCCAACAGTCGCTAGATTATGTTTAATATCAACATTTCTTGAAGATGGATTACGCATGTGGTTTCAATGGCACGAACAGAAAGAGTACATGAATTTATCGTGGGGTTGCGGAACTTTTTTAGCAACCTTATTCGTTTTAGTTAACTTAATTGGACAATTGGGGGGTTGTGTTATGGTTATTATTAGGTACAGAGTTTCTATTGCTTGTGGAGTTTWATTTTTCATCGTTGTTCTTCAAACATTTGCTTATAGTATCTTGTGGGACTTACARTTTTTAT…	yes	contig23158	OtL015-F08			11.3852	-2.06368	-1.89315	3	908	Non-Horn
contig23215_a482	AAACGAATGATGGCACCTCACATTTCATYAYMGCYGMATTTCCTCKWATKACATAYTCKTTATYYRCWTCYRYWTCGTAMKAYTGAGCWACMACTGCGCGAACGTTAACATCCCTAGAATGAATAGTGCCCACGGTATTCTTAGCGAGACAAGAGTAGACCTGGGCGTGGACTTCTTGGCGATAGTCTTCAGCGCGGARCGGCGGAAAAACGAGATTTCCGTTGGCGAGAATTTGTCTTAAGCCGGGGACATCTCCTACTGCGGTTCCATCGGATCGGACCCAGATGATTTCCGGTGGTGGGTTACCCCTGGCCTTGCACTCAACGACGGATCCCGTGGAATTGGAGAAATCGATGCGGTTCGGCGGTTCCCGTAGGAATATCGGGCCGACGGTGTCGT…	yes	contig23215	OtP011-B05			8.42261	-2.63159	-2.88235	2	658	Non-Horn
contig23218_a483	TGATGAGTTCAATTGTAGGTTCTTGTGGAATAGGGGTTGTTTTGATTTCTTCGGTTGGAACTACATCTCCCAAAATCAAAGGTTCTTCGATTGGTGGTACCACCGGACTTGGGGCTAAAACTTCTTGTTCTAAAATCTTGTGATCTTCAACTACCTCTTGAATTTGATGGGGAATGGTTTCTTGGATGTTTTCGCCAAGTATCTCTTTAAGATTATCTTCAATCACATGGATAACTTCTTCTGGAACATTTTCAACTTTTTGATCAACCTCTTCTTTGACTTTTTTGTCAAGAATTGGTTCGGGAGTTATTAATTCCACTCCAAGTTTTTCTTGGACGTCACCAATTCTTTCTTCTACRTGGACTTTTTCAACTAAAACGTCGYTATTTGTAATACCAA…	yes	contig23218	OtP018-B02			11.6123	-1.6061	-1.20277	2	727	Non-Horn
contig23533_a484	GACTCTGGGAAAAAGCTCGACTTAAAAAGCGCTTTAAGCCCCACGATGGATAAATTAGCGAATTACGGGAGCGATGATGATTACGAGGACTCCCCTAAACATCGGAAATCGGAGCTGCCGTCAACTATGGGGGCCCCAAAATCTCGCCAACAAGAAGCCGATGTCAACTACGAGGAGGTCCAAATGGATATGAGTGAGGACAGCGACTCATCAAACGGTATGAACAACAAAAAACGATCCCGCCACCGCTCCCCAAGCCCTCGGAACCGCCACGATCGCGATAAYCGRGATAGAGGCCGCCGAGATGATCATCGGAGGGAAAAAGAAACGAAATATARCCGACATAGAGATGATCGGTACTCATCGTCGAGGTACTCAAGAGATAAAAACCGCGATGAA…	yes	contig23533	OtP003-B07			9.04979	-2.32165	-2.39368	1	1001	Non-Horn
contig23544_b887	TTCACTTTGGCGGCGGCGGTGGAAGCGTGTTTGCGTTTATGATGGCGTTTTCTCGACTTGGTTGTAGCCATTTTCTCCGTTAAAACCGTTAAAACACAAAAAAAAAGATTAAATAAAGTTTCAAAAAAAGGTAGATTACGGATGTCAAAAAAAATCACCCATTTCATTTAGTAGATGTTAGACCTTGACCTTTAATAGGGGCTCTAGGAGCTATAATTACTATAATTGGTATTATTAAATGATTCCATTTCTTTAATAATAATTTATTTCTATTAGGGACATTAATTACAATTATAATTATATTCCAATGATGACGTGATATTGTTCGGGAAGGAACTTTCCAAGGTTTACATACTTATATCGTAACTATAGGACTTCGATGAGGAATAATTTTATTTA…	yes	contig23544	contig_110	OtL001-D03		11.5873	-1.52492	-1.2286	3	521	Non-Horn
contig23604_a485	GACACCGAACACCATCTTGTACTCKCTCTTGTTGTGTATGAGTGGTGCGGTGCACATTGCTCATTATGAGTTCTTTAAAGTTACAAAAGAGGCTTGCAGCCTCTGTTATGAGATGCGGGAAGAAAAAGGTTTGGTTAGATCCAAATGAAATAAACGATATTGCAAATACAAATTCCAGGCAAAATATTCGTAAACTCATCAAGGATGGGTTGATCATCAAAAAACCTGTCGCCGTCCACTCCAGGGCTAGGGTTCGTAAAAACACTGAAGCTCGTCGTAAAGGAAGGCATTGCGGTTTCGGTAAACGCAAGGGTACCGCCAACGCACGTATGCCCCAAAAAGAATTGTGGATACAACGCATGAGAGTATTTGAGAAGACTCCTAAGAAAATACAGGGAT…	yes	contig23604	OtP008-G09			12.7403	-1.62076	-2.10778	2	725	Non-Horn
contig23788_a486	AATTTATGTTTATATGTAAAATGTAAATGTTATGTCTTTTCTCACTGTGTGTGGCACTACAGTTTTAAATCTTATTTTTATATTTTGGAGTTTTCTTTCGGTACGGTCACATTATATAAAAAGAGGAAGGCACCTTTGCACCGCCTCAAAACGTATGGGGCAGAGAAGTTATGACACACAAGCATCTAAGAGACGATCTCAAAAATAATAAAAATTACAAGAATCACATAATTAACAAAAAAWAATATACAAATTAATTATATAGAACTATATGATATAATATGCAATGTTATTGAATTCATTTACATTTGTATTTTTAAAAGTTTCATTTCTTTTTTKKATGTCATTAATAAATTAATCGTTCCTTGAGAAAAAAAARRCATTTAAAATTTAATAGAA…	yes	contig23788	OtL010-G11			9.63054	-1.70162	-1.79814	3	690	Non-Horn
contig23883_a488	GGGTTTTTATGTACGTGTTGGTCTCTGCTCGTAATGCTTTTATCTTACAACCTTGTCGTCCAACGATTTCGGCAACATGTTCGGAACTTGGAACCGGAACGCATTCGGTCATATTTTGCGATTTTTTCGATCGGACTTCTTCGAGACCAACGGTGGAGACCAAAGGATTCACGAAACTGCCCAAATCGGTTGGGGTGTCTGGTTCGGAAACGGGGCCCAAAGGGTCCGTCAAACCCATTTTTGTTAATTCAAGGGCTAACTGAAGCGCCCTATCATCGGCTAAACCGGAATCGGCGAAGTAACTTGCCGGCATTTTCTCAAATTTATTTTGATGTCTTCCTTGTAACAAAAGTTAATACAATCAAAGTTAATATAACAAAGGTTCCGCACACACTTTGA…	yes	contig23883	OtP003-C09			9.91629	-0.597228	-0.512324	4	759	Non-Horn
contig24292_a489	GGTTTATCKAWCGTCTGACAGCTATTACATTATTTACCCTYTTTATACAATTTTTTACAGTTAATATAATTGACTCGAAARCGCCGTTATCGAATACAATCATGTTGTCACCGTAACAACCCCTAGAATGCCTTCCGGTGAACCACAACCCGATTTATATTCATCATGGGTTGGTTTGGTATATGTGTTCAATTTAATCGTTGGAACGGGCGCCTTAACACTGCCAGCGTCTTTTTCAAAAGCTGGTTGGTTGTTGAGCGTAATACTTCTTATTATCTTAGCGTTGGTTAGTTTTGTAACGGTTACCTTTATAATAGAAAGCATTGCTTGTGCCAATGCCACTATACAGTGGAGAAAAATTCAACATCACAAAATTGATGGGGAGAGTGAAGCTATAGT…	yes	contig24292	OtP013-B12			9.05863	-2.10331	-1.79206	4	1277	Non-Horn
contig24434_a490	GGAAATAAAACAGGATCAAGAGTACCCAATTTTTCTTGACATTCATTCGACGGATTTTTTTCTTGGTTAACACTTTTTTCTTGACATTTTTCCTGTTTATCTTTTTTATGATTTTTATGTAATTGATTTTCTTCTTCTTTTTGATCATCTTTTTTCTTACGCCTTGTATTATTATCGAGTTGCGTGGATGTAGCTTTACGTAGGCGAGATACATCAGGAGCGAAAAAATGGGAGAGACCATCGAAAAGATTTTTTAAATGACCCGAAGTTTTTTCGTTCGATTTGGTATCTTTTGACGATTGAAGTATTGGGTTTTGGATGAAATCGGAAAACAATAAAGTTTCTTTTTGGGCTGCCGCCGCTGCGAAACCCCATAATTTCTCGTTGTTATCGACTCCA…	yes	contig24434	OtP018-H11			9.06654	-3.12075	-1.81885	3	831	Non-Horn
contig24738_a491	GGGGATTTAAAACGATTCGAAACTAATCTAAKGTTGTCATCAAAAAATCGTTGACAGTTAAATGACAGGAACTGACACGAGGTAAATATTACAAAGTTTTCAGGATTTTCGAAGAAAAAATCTCGGAAAAATGAATGATACAAAGCTGGAGATGTTTGAGGATGTTGGGGGTTATGTTGAAGGTGAAATGACGATTCCTGGGATGCAAAAAGGGGCCAAACCTGGCGAACCCGCATTTAATACTTTAGATGAACCAATTAAGGACACAATACTAAGAGATTTAAAAGCTGTTGGTGTTAAATTTGCTTAYGTTTTATTTCCTAAAGAGAAGAAAACACTTCTTAAAGAATGGGATTTRTGGGGACCTTTAGTTTTATGTACTTTTATGGCAATGATTTT…	yes	contig24738	contig_345			9.50714	-1.89081	-2.17943	2	1109	Non-Horn
contig24757_a492	AAATGCAACTAAATCAGAATGAAAGTGGTAACAATTCAATAAAGGCTCATTGAAAATAAATTATTGTATAAAAAATTTATGTTCAATGAAGACCAACAAAAAATGTGTGCACATAAACAAATGTTTGATATCCAAAGAAATGGGTAAACTCAAAAAGAACCCATCTCTTTCTCACAAAACATTTGTGTATCTAATCACAGATGACATATAAAAAAATGGAAGCAGTAGAACAACACAAATACWTAACACCGGCTGTTTGAAACATACTCCATAATTTTAAATAAAACTCGACATTACTTAATATTCGCTGCAGAARCGCGTTGAATAGTAAATTAGCGAACAACTAATGASGCCAGTAAGAACAATCGAAAAACATGAAGGCTCCTTGATAAYAAATTA…	yes	contig24757	OtL009-B06			9.04735	-2.71399	-1.83474	2	717	Non-Horn
contig24794_a493	TTTATATGTTAGAATCAAATTTATTTTGCCAATCACAGTTAATAATTAAAATAATTTTCCAAAATAATAATAAAAATTCATTTAAATTTATTTATCTTCATCAGAATTGTTCAAACCATWTCTYTTCTCCAAATCATCATTTCCATTTAATAGACAACTGAAGCGTGGTATGGAGCAACTGCTGGGACRCCTCCGTGGTAAGCTACAGCTGGAGCAACTCCGTGGTAAGCTGAGTATCCAGACACAACTGGTGCAGTGTATCCAGTGTATCCAGCAGAAACAACCGGGGCGGAATAAGCGGATACAACTGGAGAAGAATAAGCCAATGGAGCACCAACAACTGGAGCAGAGTAAGCAGCAGCTACAAGACCTGGTTTTGGTTTTGGTTCAGGGGCAGCA…	yes	contig24794	OtL016-F08			10.2806	-0.905165	-1.64909	4	489	Non-Horn
contig24822_a494	CGGCCGGGGCTCTACGACTTTTTCGGTGGTGGTGTCAACATCCACGAGCCGAAGATGGGGAGACGTCCCGCAAGATGTTATCGTTATTGTAAAAACAAACCGTATCCAAAATCGAGATTTTGTCGTGGTGTCCCAGACCCGAAAATCCGCATTTTCGACTTGGGCAAAAAGAAAGCGGCAGTCGATGRTTTCCCTCTTTGCGTTCATTTAGTTTCTGACGAATATGAACAGCTTAGTTCTGAAGCTTTGGAAGCCGGACGTATTTGTGCCAACAAATACTTGGTTAAGAATTGTGGTAAAGATCAATTCCACATCAGAATGAGGTTGCATCCTTTCCATGTTATTCGTATCAATAAAATGTTATCATGTGCTGGAGCTGATAGGCTCCAAACGGGAATG…	yes	contig24822	OtL012-G01			11.3674	-1.69441	-2.48417	3	760	Non-Horn
contig24847_a495	GCCGGTACAATTGGTAGCGCGTACCCGCTTAGSATTTCTAAGCCGGCCATTTGTCCTATCTGTTCAGCGCTCGTATCAAAACGTGTTAAACGTGAATTTACGCCGAAACGAGTGTTTCAATTAGGAGGAATTGTCTTCGAGACGTTTTAAGGTACCGTTTAACGTTGCAGTAGAACCCGAAAAATCACCATGAGCGATGAAAAAAAGCCCGAATCTGAACACATCAATCTTAAAGTCGTCGGACAAGACAATGCGGTCGTGCAGTTTAAGATCAAAAGGCAGACACCCCTTCGGAAGTTAATGAGTGCTTATTGTGACCGAGCGGGTTTGAGTATGCAAGTGGTACGTTTTCGATTTGATGGAAACCCAATAAACGAAACAGATACACCGCATTCCTTG…	yes	contig24847	OtL005-C06			11.8132	-1.86567	-1.73072	3	865	Non-Horn
contig24946_a496	GGAATCGCACAAGTAAGTAAACKRTYWWTTTTCTATTAAAATATTTAACTTTCAATTCTTTCGGCAAATCCGATTAAATTACAAATTTTTATCCAAATAAATCGTTAACAAAAAAATAAAATACAATGGAGGTTAATGTGAAGATAATAGTAAAGTGGGGTGGAAAAGAATACGATGTAGAGGTCTGCGAAAACGATTCAATATCCGATTTGAAGAATTGCATTCACAAACACACTGGTGTTAGACCTGATAGACAAAAATTGTTGAATTTGAAACACAAGGGGAAGCCTCCCGGAGACGACTGTAGGATATCACACTTAAATTTAAAACCTGGATTTAAATTAATGATGATGGGGTCTTTGGAAGCCGACATAGAAGATGTGAATAAAGCTCCAGAAG…	yes	contig24946	OtP003-A07			9.19005	-2.60434	-2.75354	3	1051	Non-Horn
contig24968_a497	GGAGTGCAAATCTGTGATTCGTTGTGTTACTAACAGGAACAACCAAATTRCATCGCCAACATGTCTCTTGAAGCTCAATTCAACGATGCCGCCGTTAAAGTCAAAAAATTAAAAGCAATGCCAAGTAATGATGATTTGCTTGAATTGTATGGCTTATTCAAACAAGCTACCGTTGGTGACAATACCACAGAGCGTCCTGGTATGCTTGATGTAAAAGGTAAAGCCAAATGGGACTCTTGGACATCAAAGAAAGGCATGTCCAAAGCTGATGCTCAACAAAAATACATCGACAAAGTCGAAGCTCTTGTTGGTTCAATTGGTTTGCAATAAATTGGATCAATCCAAAACATAAACTATTGTTGAGATGTACACTCATTTTTTATACTCTTTTTGTTACAT…	yes	contig24968	OtL020-E11			9.26778	-1.34053	-2.36977	2	460	Non-Horn
contig24988_a498	CTTGATCATGTCCTCGATATTGAAAACAAACGGTTCCTGTCCAAAATTGGCATCGACCACTTCCCCCGGCGTTTGTAGTCCGACAGTTGGATATAAATTTGGAGGTAGAYCTGTAAAGGCTGTGCCGAGGTGATGGCCGTTTTTAGTGTAAAAACATGTGTTTTCTATAAGATTAACACCACATCCGATTACATCGCCCGTTGTAAATGTTGGTCCATAGGGTTGCCCTGTACCAGATGAGCAGAACGTATGGCCATCATCACCATGATAACCATATGACTGCTTATCCCAACCAGGCAATCTATTCATATTGACACCTTGTGCAGATAATCCGATACCCATATAACCATCACGTCCCTTACTAACAATTTTCACTTCAAAATAGTACAATCCACACGC…	yes	contig24988	OtP020-H11			10.0714	-1.71681	-1.1559	3	730	Non-Horn
contig25045_a499	AGGATCAGTGCTAGAAATATGCCGGTCGACTACGGCCGCCTTATCCCAGTTCATGATCTCATACATAGACGACGACATTCGCATATCTTCTATTGAACGTTCGAGGCCACCTGCGGACGTAGCTCTTTTCTTGCTACCTCCGTCAAGTTCCCTCTCAGACTGTCTCCTAGTCAACGGCGMCGCTGCGCTGGTGATATTCTGCGTAGAGGTCGCCCTACGATGACCCCAAAACGACCCTATGGAGTCGGTAGGTTGGAGCATCCTAGGTGTTGACGAACCAAACGCAAACACCATCGAATGCCTTTCGTTGCGTTTTTTCGCTTCTATTCGCGCCTCCCTTTCTTGATTGCGCCTTAAAATCGCTTCCAGCCGATCCCTTTCGGCCTCGTTCATCATTTT…	yes	contig25045	OtP010-B03			10.9807	-0.848777	-0.703772	4	755	Non-Horn
contig25069_a500	CGGGGGCTTCCGCTTGAGCTGTCTGCTGATCGAGGCTTTTGCGAGAGCTTCAGTTTGCCGTGCGGCGAGAACCGTGCCTGGTGATACCGATATAATAATACCCGCGGTTTAACGTTTCTCCTCCTCTATCTCTCTCTTATCTACTATAACACTCTGTGAGTGCCGTGTTAAATCTCACCTCAAATTTATTAACTAAATAACCTAACTAAAAACGCCGACAATATGAGCTGGAAAGATTACGTAGACAAACAGCTCGTTGCCTCCCGTTGTGTGACCAAGGCTTGTATCGCCGGCTTAGACGGCAACGTCTGGGCTAAAAGTGATGGTTTCGAGGTAACAAAGGATGAATTGGTAAAATTAGTAAGCGGTTTTGAAAAGCAAGATATCCTGACGTCGTCG…	yes	contig25069	contig_356			13.4278	-2.80288	-3.02121	4	1135	Non-Horn
contig25095_a501	AGTATGAAGTTGCGCAAGTGACCCAACGGCCACAACCCACTACAAACTTTTATCAGAATGTAAGTATTTTGGGTGGTTTACGTTAATTCGAAATAAAAATTGCCGTGGTGTATTCAAAAATCGTTCGAAATCGAACGATTACGCTCAACATCTGCTCATAATTATGTGGATCGTAGAGGCATTAAGGAAGCCATCTTGSWKTWTRRMRYYGYSCAASKGAYSYMAMSRSMAMWAYYSWMWMSRAWYKWWKWTYARARWGTAAATAATCATGGCTGGAACAGAAGCGGTTGGAGACTTACTTTCTCGTTGGTCTTATGTTGTACATACACCCAGCGAGGAACCCGAACCATCAGAGTTACCCAGCRCCGTGGACATGGCTGCTTTCAKCTCTGARTTAAA…	yes	contig25095	OtP016-G07			10.2775	-2.29311	-2.22845	2	937	Non-Horn
contig25106_a502	AAGAAATTAATCGGTCATACAAGGATTAAATTACATTGATTATGGGAAAGAAACGTTCGTGTTCTTATTGACCGTTTGAGTCTCCTCTTTAAAATTATTTAATCTTTCAGCTAATTTAAATAAAAATTTAATCAAAAAACGTATTAAACCACATTTCATTCTTTACCAACACTCACCGCCAAATTAATCATTAAAAATTTAAAAAAAATTGAGGTTCGTTTCCTAATCTACAATCGACCTCTCCTTCAACTTACCAATTTTCTTTCCAACGATCAACGGAAGAGGTTGTTCCTCATCCAAATCCAACAAGTTATCCTTAAAGAGATCATCCTCGGCATGTTCGAGCCGTTTCTGCTGCGTGAGCAGCCGGTCTTTGATCAAAAAGATCTTCGGCATGTT…	yes	contig25106	contig_442			7.95047	-1.12022	-1.46403	1	743	Non-Horn
contig25126_a503	GGKCATTCAAAGCTTACGTCGCAAGCCGACTCTTGGTATCGACGCGATATTTCTCACTAACTAGTTTCATTAAAGTGACAACACAGTTTTTTTTTGTGACTAAACAAATAATTTGCGTGAAGTGATTAATAATAATTTCTTATCGTGCAAAATGAAAGCAGCCAGTGTTATGTGCCCCAAAAACAACAACAACGTGTCCTCCGGCAGGATAACGAAGCGAAAGGACATCGAAAACGAGGAGATTCAGATGTATATCAGCAAATTGAAAGACTTGGTTCCTTTCACCCCCAAGAACAGGAAGCTCACCAAATTGGAAGTTATCGAACACGCGATCGCGTACATCCTMGATTTGCAAAGTGCTCTCGAAACCCATCCAGCGGTGAACGCTTTCGATGCCGC…	yes	contig25126	OtL016-F03			11.812	-1.9076	-1.8287	2	1077	Non-Horn
contig25183_a504	AATAATTTTTCGAAGTAACACGTTTAGGCACGTACGGGTTCGGTTTTTTCGGGCGGATTCCGTTCGGTTTTATGGCGTGGGACACGTGCGAACGTTCGTTTTACTATTGTTTAAACGGCGTAACCATTATTTCAATCGCGTAAAAATACTGGATTTGTGTGTATGGTTTCGRTACTAATTTTTAATTTAATCACACCACTACAACAACAACAACCACAACAAAAATGGATCAACAATTTTGTCTACGCTGGAACAACCATCCGACAAACTTAACAGACGTCCTCTTGAGTCTATTACGAAGACAAGCCCTTTGCGATGTAACCCTGGCCTGTGAAGGTGAAACGCTCAAGGCGCATCAGACGATATTGTCAGCATGTAGCCCTTATTTTGAGATGCTCC…	yes	contig25183	contig_287			9.00675	-2.37394	-1.15218	3	1009	Non-Horn
contig25229_a505	TACGTCCAATAATATTATTAGCCCCAAACAATGAAATCATTTTGTCGGTGATGTTTACTTTGGCCATTCCATCATCGCCAGCTTCGATGTTACCCAAATCGCCKACATGGCGATCGGAAGCGTCCGGGGAACCATGATCTTTTCCGTAGGGGTTGAAGTGAGCCCCAGCTGAGATGCACCCATTGGTGTTATCCCCGAATTCGTRAATGTGGAAGCCGTGAAGACCTTTTCCTAAACCGCAAACGTCCCCGGTGATTTTCACCGCAGAACTTTCATCCTGCTGTTCGAAAAAAAGGGTTCCCTTAACGATTTCGCCGTTTARTACGCAGACTGCTTTTGAGGGCATTTTCGGGCTTAGAATTCGATTGTAATCGACGTGACTTTGCAAAAGAATTATGC…	yes	contig25229	contig_70			11.4941	-2.19176	-2.70095	4	446	Non-Horn
contig25236_a506	TTTAAGATCGTTTGACACTGAAACCCAAATTGCTCGTTTTCGACCTTTCATGTAATTCTCAAAAATCGTTCCGGCTATTGTTCTACCTTTTCCTACTCCCGCACCATCACCTATTAAAAATCCAGCTCGACTGCCATCAGGTAAAATATGTTCGTGAGCTTGCGAAGCGTACGTTATACTTTCTAATTGTAAAGCAGATAAGTGTCCGCCTCTAATTGTTTCATCAGGAATCGATAATTTATACCAAACATCAGCTGGAGCCACCGAGGATAAAGAAGCCGTTTCAACGACGGGATCTGGATGCTTTTTCCCCAATTTCAACTTGGCCGGCATGTAATCGGCGTAAGTCTCAGCAACTCCCATCTCCTCATCATCGACTTCCTCCTCTTCTTGCAACTT…	yes	contig25236	OtP017-F03			9.22403	-1.42084	-2.23458	2	779	Non-Horn
contig25238_a507	GTTAGAGGGAGCAATGATGTCTCGCCGATCGAGTGGGGATAATCCGTTACTTGTTCGACGTCAGAGGATATGTCGGCGGTCATATAAAGGGACATAAAACTTACATATTACTGAGCCAACAATACCGGGCAATAAAAATTCAAGCATGCTATGGCGAGTCGTAAAATTTCTTCCTATATTAATTTAATGCCGGCTTTTATGGCGCGATTAATATTTATTTCTACCCGGTATCAGCTACTATTTTAATAAAAACGACGTGCCGGAAATGATAGTATTAGCTTACCGTCTTACGGAATTACACAGCATGACACAAGATAGGTACTCACATGCTATTCGTGGTGTTCCAGTGCACGTGGAACGACTTCGAGCACGTCGATTCGGTGCAGAGCAGAACGGTCT…	yes	contig25238	OtP012-F09			8.41925	-1.71503	-0.924014	2	694	Non-Horn
contig25249_a508	CCAACCTGCAGCTTTCTGTTGATTCGCTCCACTTGATTGTTGAGCCACGTACATAGTGGCTGCGGAATATAAAGCGGCGTCGTATCCTGAATATGTCGGTTTAGCTTGAGTTGTTGGTTGAGCAGCTATGGTAGTCTGCGCGGCTGGTTGGGCGTAAGTCGCTTGATATCCGGTTGCGTTGGCCTGGTAAGTTCCTGTATACTGCGTCGGTTTTGCCGTCACGGTCGCGGCCTGTGCTTGTGGTTGAGCAGCCGTTCTCTGGGTGTATGTTGCAGTGTAACTTGTCGGTTTTGCAGTGGCGGCCGTCTGATCGTATCCAGCAGCCGTGTAACCAGCGGCTTGGGCTGCTTGTCCTGCGGCCGTCTGCTGATAGTAAGTTTTACCAGCGTCCGGATAACC…	yes	contig25249	OtP016-B03			9.94722	-1.97416	-1.57451	3	715	Non-Horn
contig25303_a509	GGATCCTAAAAGTGTATGTTAAAGGAATTTAATAATTTGTTTTAATAAATTATTATTTTTGAAAATTTTCTAATTGAGGGGGAATTTTTTTTTATTCAACAACGACAATAATCTAGGACAGRKGGAGACGTAAAATGTGAGAGGTGCATTGCTAGAGAGTCCATTGGCAGTTTTATGTTGGAAGGGAAACGGAAAGCATCGAGAGCCGCTTAAGGCCAGCTGTACAGGCTGTTTGCCGTTTTTTTTTCTCAACTTCGACGTCTTTAAACTTCTTAACAAACAACCGCGTCGTCAAAACGGAAGTAACACACTAATTAAACCCAAAAAACARAGAAAAAGACAAAAACAATCACAACTTAATAATCATGGCTAGAGGTCAACAAAAACTCCAGTCTCAAG…	yes	contig25303	OtL008-H06			11.5963	-1.70352	-1.366	3	978	Non-Horn
contig25313_a510	GGAACCGCAAASGTTTCAGAACGTTCGCGACTTTAAAAGCGACAACATGAAGTGTTTGGTTTTTGCGTACGTTTCGTTGGTTTTTTTGATAAAATTGGTCKTTTGCGATGGCGGAACGAACCAAATCGATAAAATAATCGATTTAACTTGGGCCGTCGATGTTAACCCAATTTCTTGGCCGAATAATAAGAAGTTTATGTATACGAGACAAGTTGAGAAACAAAATGAAGATGGAAGTTGGTACGCCACGAATGAGTATTGCTCCGGAGAGCACGGAGGGACTCATTTAGATGCTCCTTATCATTTTTATCAACAAGGATGGAAAGTTGATGATATTCCCATTGAAAGATTTTTCGTTCAAGGTGTTCTTGTCGATATCTCGCAAGAAGTTAATGATAC…	yes	contig25313	OtL007-G06			11.3891	-1.51699	-3.09396	4	899	Non-Horn
contig25421_a511	CACCTGGAAATCCCGTTTCGGTCTTCCGTTTCTTTCATTGTTATTGTTACTTTTTTCGGGCCAGTGTAGATTACTTCTCCGGCGTCTAACTGATCGAGTAAACTATCAACAGGTGGTCGACCCAATGTGTTTTGGGCACTCGAAGGTCTCGAAGAATAATTCGCTGGACTTCGTCCTCCTGATCTGCTATAAGTCCCATTATAACTTCCGTTAGCACCATTTTCTATGCYTACGTTGGCGTATCTATTCTGGTGCAACTCCGGCGAGTTACTGAGATCTTGAAGGAGTGTATCCAGTTCGGATAGGTTGTTATTAAAAGGTCTTCTTTCAGCAGTTCCATACCCGCTACTTGGTTGAGTCGGTTGACCATAACCAGGACTACGAGTTTCAGAACTTTTA…	yes	contig25421	OtL017-E11			11.4957	-1.66193	-2.21188	3	740	Non-Horn
contig25590_a512	GACTGTTTTGCTTGCAACCATCTCGGATTACTTAAAAAGCCGCCCGCGTTCTATGAAACCACACCGGAATCGCATTCAGAACGTCATTAACGCGTCTATAGCACCAACTTCCGCTTGTTCAATTTGAGGTTACCCGAAGGAGAAACGATGGAAAGTGAACAATTCTCGTTGTGTTGGAACAATTTCCACAACAACTTAAGTTCAGGCTTTCATACTTTGCTTAGGGATGAAGACCTCGTTGATGTAACACTGGCAGCGGAAGGGAAGTACTTGAAAGCCCATAAAACGGTACTTTCCGTGTGCAGTCCGTATTTTAAAGAACTATTTCGAGTTAACCCATGTGATCACCCAATAGTTATTTTACAAGATGTTAAATACACGGCACTGCAAAGTTTACTC…	yes	contig25590	OtP002-C05			9.53017	-2.45733	-2.98663	0	924	Non-Horn
contig25669_a513	GGTCCCTATTACCAGCCATAAACGAGACTCAGAGGCGCATAAAGAATAGAACAGAGTATCGTAAACTGCTAATATAACCGAGCAGTAGTAGTGGTAGTACGTGGTGGCGACGTCGTCGTCGTCGTCGTCGTCTGGTGCAGCTTCTGCACTCGCAGGATTCGTTTCGTCCCGGTTTCGCACTGAACGAACACGAACAGGACGGACGTAGCTTTCGTATAGGCCTACGGAGGCTGCTATCAAAACTCACTTCCACGAGTTATAGCCGCATAAAACACGGTTGCACTGTACACTCCGCACATGCACATTCCCCCACCGTTCAAGTCGTAAATGGTCGTACCCTTTGCCCCGCCACAGCCGTTCGCGATGCAATCCTGCACAACTTCACTCCACTTTGGCATT…	yes	contig25669	contig_255			8.85143	-0.261442	-0.99097	4	1383	Horn
contig25743_a514	CGGGGAGACACGAGCGGAGCTCGCTTCGGAGCAGCRGTCGATTTCGAGCAGTACGTGGTGCGTGTTGCCTCTGCGATATTGGCTTCTTCTTCCACATCCGTTCCATGATGATTTGAACGTTTCGCACGGCATTCAGAACCCGAGTTCCAATCGACTCGAACGAGAACTACGAGTCTCAATTTGGTCGTTAAGATAAATGGATTTTTTGATATTGAAGATAAACGGAACGGACGTGAGCGGTTTTCCTCACCAGGACGCGGTTAGGGCATTTTTGGCCGCCCAGGAGCCTATTGTCGTCGAGATCAAGCGACGAACAGTTCCGGAAGACGGTGCTGCCAGCGACGTGGTTATACCCCAGTCAAATTTTACTTCCACCGCCGTCCAGACAGACATTTCGGC…	yes	contig25743	OtL015-F02			10.3036	-1.45555	-0.985747	3	742	Non-Horn
contig25832_a515	TTACTTCTAAGAAAATTTCACAAAATTCAGGTAAAAATTTCTTTGTATCTTTTAATTTTTATGTTTGTAAATATCAAAAGAAGTGGAGGGAGAGTTTTGTGCTTGAACCAGCTGTACRWAAACGCATGGAACGAGCCAAAGACCTCTTGTTGTTGGAGTATTTTCGTTATCTCGACTTCGAGGAAGAAAAAATAATTTTTGTGTGGTGATGGCTTCCAARGCTGTGTTAAGTGGAGTTTTTGGAACTTTGAGGAAGCTCCAAGGTGTTAATAACATCAAATCCATCGTTAAACAAGGCGATAAAAAATTATTGACTTTAACGAGTTTTAATCATATTCAAAGAAATCAAGAAAGAAATTACGTTTCAAGGAGTTATACAACRAAGAAATTACCGATCCA…	yes	contig25832	OtL001-C02			11.9349	-2.09686	-1.94446	0	550	Non-Horn
contig25848_a516	GGTGCAATCGCGGTAGGTGGCCTCGACGCGAACGATCTCCCTATAAATGCGGCCTTCATGCACTGAGCGCACATAGCTTGGTTCAGAGAATGTTGGAGCATACTCATTGACATCAGAAACTGTTATATGAACAGTAACACTGGGACTTTGTTTTTCGTTGCAACCAACGGCGGCGATGTCGAACTTGTAATTCCGTCGCTTTTCGCAGTTTAAAACGCGCTTGGCGCGGAGTTCCGCGAAACCGTTCTCTTTGGAAACGATTTCGAAGGGGGCTTCGCCGTGGTGCTTATTAACGATTCGAAAACTGCAAACGGGGACCCCGATCACCTTTATTGCCGGCGTCACCTCGACCAACGTCTCGTTTTCCTTGACCAAACCGTGGTAACCATCTTCGGTGTT…	yes	contig25848	OtP018-A01			10.8703	-1.72083	-2.04712	2	649	Non-Horn
contig25870_a517	ACGATACCTGCTGGTACTTCATTATGTATGCTATTGCTATCGTCGCACTTCTCGATACACCTGCTTGACAATGCACCAATACTCTTGAACCACTTTTTCTTGCTTCCTCTATAAACTCAAATGCTTCCTCGAAATACTGCTTAAGGTTCTGTTGGCCGGAATCGGATGCCGGAATTTGTTTGTAGGTGATCCCGCACGTTTCGTGGTATCCGGGCAGCTGCGAGGTGACGTTCAATACCCACGTGGCCCTCAAATCCTGAAGACGATCCAAATCGGCTGCATCCCGGCTGTTCCCGAGGTACAAAAATGGTAACACCCTCGAAGCCGGATGCGAATCAATATCCGCTATTGATGGACAAGATGCCGATGATGGTAATCCTCTGGAGGGTAATGCTGTAG…	yes	contig25870	OtL012-D01			8.65895	-1.84808	-2.34709	3	682	Non-Horn
contig25893_a518	GGAACCGCCCGATAATAATTAACATTAACATTGCTGACATTAATAGGAGGAAATCTGCGTTGTTCATCACYCGAATTRTTATTATCCAACTTTTTCGGCACCGACAAGCTCCTAATRTGACTAATAGGAACTGTTTGTTGTTGATTRGTTTCAATTTGAGAGTGGTGCCTTTGATGGTGATGATTATGGTGGTGGTTAAGATGGTGGTGATTATTTAAATTAACTATATTGGCCGAATTAACGTTCGCGTTGTATTTAAACTGCCCCGTTGTTAACGAGTTAGTGTTCCTCAAGTTTGATCTGTTRCTKGGTAATCCGACGATATTCACTTGGCTTAAATTCCTCAAAGCGATGGTGGCGTTTTCGCCATTTTGTTGGATCACCTTTTCGGTGGTTGCC…	yes	contig25893	OtP015-F07			8.90493	-1.7917	-1.49606	2	509	Non-Horn
contig25970_a519	GATATTCCAAAATGGCCACATGTTATTAAAGAGGTTATGTTTCATAGTAAACACAATTCAATTCAAAAAATCGATTTAAATTAATCTTAAAATAATTAAAAATGTCTAAAATATCTAAAATTCCCGACTTAATAAAGACGATACAAGACGACGAAGATGTCGAGGATTTTTCTGAAGATTCAGATGTAGAATTGGAGAATCACTTTCAACCGACCAAGGAAAAGAAAAAGGAGAAAGATTTCAACACTGASTTTCAATTTGTAAGTTCTGTGGAGGAATACAATAAAGATGAATGGAACGATTTGATGAAATATGTAAAACGAAAAGCGAAAACAAAAACCGATGATAAAATTAAAAAAGTTTTAGCTGCTAAAAATCAAAGTGAAATTATAAATAATG…	yes	contig25970	OtP016-F06			9.1993	-2.11358	-1.9941	4	880	Non-Horn
contig26035_a520	GTGCAAGAAAATAAAATAAAAAATAATTAAATTCTGGATTCTAGCGGCAGTTTAGTATTCAGCTGTTCGGGTGTCCTGGACAAGGTACACCTGAGAACCGGGAACTGTGCTTGTGGTTACGAAGGTGCGGTGCTTGGCGCGGATGAGAGACAAGCTACTTTCGGCGGTGTCGGCACGATCTTCAGCGGCCTCCAATTCGCGTTGGAAGCGACGGACTCTAGTTACACTTTGTTGCGAAACTCCCTCCTGTTCTTGAAGTTGTCTCTTGAACAAAACAACTTTCTGGTTGGTCTTCTCCAAAGATTCCTGCAAAATTTGAATATTCTTCTGGTCCTCCTCACATTGAATCATGAATTCCTTCACGCTACGTTCCTTCTTACGCARGATCTTAATAGTTTC…	yes	contig26035	contig_339			11.6343	-0.290153	-1.38678	4	408	Non-Horn
contig26122_a522	AATCCCTCCAACGTCGGTACATGACGGACGCGTCGACATTGGCTGGACTGAATGTGTTTGGTTCATTTAGGAGAGATATCACACTGAGCAAAATTGTTCTGACATTTTGAGTTGGATTCCAACGTTCGCAGGATAACTCTCCTGATTGAGGATCATCAACTGGAGGATGTAGAATACTTATGCATAAATCACCATYCTCATAGACATTTGGGTGCCAAACTTTAGTTAAAAATCTAATTGTAGGCGGTGAATAAGGATAATCTTGCGGGAACTTCATCCTTGCCTTGAAGCAACCGCCCATGTAAAGGGTGTCCGGGGGGCCAAATATCGCAACCTCCCATTCGAATAAATCTTCGTTGACAAGTTTAACGCAAAATCCTTCGACGGGTTCTTCCTGGA…	yes	contig26122	OtP015-B04			10.6435	-1.27381	-2.0007	3	727	Non-Horn
contig26161_a523	AGTTTGTTTACGCTKSCTCTTCCGTTCTACACTGGTGTCAGTAGGTCCATCAACATGGGGGCCTACAAGTACATTCAAGAACTTTATCGAAAAAAACAAAGCGATGTCCTTAAGTTTTTACTCCGGATAAGAGTTTGGCAATACCGTCAATTAACAAAGTTGCACCGAGCTCCCAGACCATCTAGACCAGATAAAGCTAGGAGGTTAGGTTATAGAGCCAAACAAGGTTACGTTATCTTCCGTATTCGCGTTCGTCGTGGTGGTCGTAAACGTCCAGTACCAAAAGGTGCTACTTACGGTAAACCTAAAAGTCATGGAGTTAACCAACTTAAACCTGTTAGGAATTTACAAGCAATTGCTGAAGAACGTGTTGGAAGACGATGTGGTGGTTTAAGAGTC…	yes	contig26161	contig_195			13.3563	-2.37135	-2.15372	4	718	Non-Horn
contig26194_b888	AAGTTTTCATTACGCCACAAAGGTACGCCGATTTGTTCGAAACGTGTTCGAGGTTCGAATCCAAAAATTGCCCGAGAACATTGAGCGCGCCATCAACGGGGAACTCCTTGAGGGCGTCGAGAGCGCGATCGTCCAGGTCAACATGGGCCAATTTGCCCGTTTTGTAAATTTCGTCCAATTTAGCGGCCACCTTTTCATCGAGGCCATACTCAATCAGCTTGTGGTAGTCTTCCGTTCTCTCCGTATCGATTTCTATCTTCATTGACTCTTCAAGCAGGACCTCACCATTACCTTCTGCCATAGCTACCACTAACTTTACGCACTTTTTATTTATAACGTTTCTTCATACACTTTAATTCACATCAACAAACAAAAACATCTTCATCCGTCCGCGCGACG…	yes	contig26194	contig_301	OtL004-A03		11.6269	-1.35281	-2.00874	3.5	951	Non-Horn
contig26214_a524	TCTTTTTCCTCCACTTTTTGGGCAACAGCTTCTTTATCTTCATCTTTCGTCGGCTCTTGATCTTGACATTCACCATCTTCCGCTTCAAAATCGAGTTGTTCTTCGCCTTCTTCAGCTTTACTCGTTTTTTCAGAAACCTTTTTTACTTCCGTTTCGGTCGGCTTAGGATCGGCGGGAATTTGTTCTTCTTCTTCATCTTCGATTTTATCCTCTTTATGTTCTTCTTCTTCTTCCTCGGAATGACATCCTATTGAATCATCTAAATCGGAAACGTCTGATAAATCGTCGTGAGTGATGTTTATCGATTCTTTTTTCGCTTCTGGACTCTGTGGTTTTTCATGATCCGATTCCATATCACCATCTGAAATTTCTTCAGCTTGAGTATCTTGATTCTTCCCA…	yes	contig26214	contig_367			9.18326	-2.77616	-1.74879	3	1498	Non-Horn
contig26295_a526	GGTCCCAGTGGAGCCTACAGTCCAGATGGAACGATGGGATACATGATGGACGGCCAACAGATGATGCACCGACCTCCAGGTGACCCAGCCTTTCACAATCAGTACACGCACTATCCTGAATACTATGGACATCATCTATGAGGATTCTTTAGCACGTCAATGTCGGACATTGAACTTTGCAACTCTTAATTGTGATTAAAAATACCTGTACAAAGTGTAAATGTAGTGAAAACCTTGCCCCTTCCACAGTGTTTTTTATGTTCGTCGATCGAGTGTGACCTAGCCTTTTTGGGTCTCCTGGAAGAAGGCAAAAAGGGTGCGTCCCGTCCGTGCGTCGAGACGGTCGGTGGTGCGAGGAAAAAGGACTATTTAAATAAAAGCAAAAACCCTCTGTACAAA…	yes	contig26295	contig_122			10.2295	-2.51982	-1.25287	4	1113	Non-Horn
contig26399_a527	GGAAACACGTGACGTATTCTCSCATTTTGTTCRCACTTTTTGCGATGTCCCATAGGAAGTTTAGCGCCCCCCGTCATGGATCGATGGGGTTCTACCCCAAAAAGAGGTCCCGCAGACATCGTGGTAAAGTTAAGGCCTTCCCGAAGGATGATCCAACCAAGCCGGTACATCTCACCGCTTTTATTGGGTATAAAGCTGGTATGACCCATGTTTTGCGCGAAGCCGATCGCCCTGGATCAAAAATTAATAAGAAAGAAATTGTTGAAGCCGTAACAATCTTAGAAACACCTCCAATGGTTATCGTTGGTTGTGTTGGGTACATTGAAACACCCCATGGTTTAAGAGCATTAGCTACTGTTTGGGCTGAGCATCTTTCTGAAGATTGTAGAAGACGTTTCT…	yes	contig26399	contig_149			12.8542	-1.93924	-2.3443	3	408	Non-Horn
contig26415_a528	CTGCCCTTCAAACATTGCACAAAGTAAGTTCGAAGGCACGGCAAGAAAATTATTATCAGGGCGGAGTGRMCCACTCGTGGGTKAGTTACTATGAGGAAAGGATTGAATCGGATAGATCTTGTCTCAACGAATGGCACGCAATGGACAACCTGGAGTCCAGGAGGCCACCTTCCCCCGATTCGGTTCGCACAAAACCAACCGAACGGGATGAAACGGAATGCGTCATCCGGTCCACTCTGAAAGAAATTATGATGTCCGTCGATCTGGACGAAGTAACCAGCAAATATATWAGAGGTAGACTCGAAGAAGATCTCGATATGGATCTTGCCGAGTATAAACCTTTCATCGACCAAGAAATGCTTGTTATTCTCGGCCAAATGGATGCTCCCACTGAGATTT…	yes	contig26415	OtP007-F10			10.8693	-2.80913	-2.26267	2	460	Non-Horn
contig26570_a529	GGGTTACCTACTATTTTTGACATATCCGCGTGTTATTCAGCAATTATCGTAACTGATTGTTATTTCCATCAAGTTTTTTAAAGTGTTGTATCCCCGTTTATCACCACTAAATCCGCCCGCATTAATTTCGGCCCTCATACGCCTCGTGAATACTAACATTATGAGTTGAAAAATGTACATCGAAACACAATAACACCAATAACGAAATGGTAGTACCAACAGCGGGCAATATGAGTGCGAAGGCTGTGTTGATCTGTCGCCCCAATTCACATCCGTTCCAAGATCGTACTTTATGTTTGGATCAACCTGTGAAGGTGGGACGATCTGTAGCTAGGGCGAAAGCAACTCAGACAAACGCTATTTTCGATTGTAAAGTATTGTCAAGACATCATGCTGTTT…	yes	contig26570	OtP006-H03			9.0088	-1.54156	-2.10275	2	810	Non-Horn
contig26601_a530	TCTATACGAGTTTTAGCTGTSACATTTTCAATAATTGACAGTACGCAATTTTGAGTGCGAGGTTTTCGTTGCTTTAAACTCCTTGTATTCATTAATTACGTTATTTCAACGATATTCCGCGGATTGAAGTCAACCTCACTTGGTATTTATTTTAATACGGTTTAAAAGTTAATAACTAATAAAAATGGAACCACAATCGGAAAACACCACATCAAATTCGACTCCAAATCGGGGCCTCAATATAACCGCTTTAAAAGAACACGTTATTTCACACAAAATCGACGTGGCCCTTTGGGCGATTAGGATCTTAACGTTCCTTTTTACTATAGGTTATTTATTCCCAATATTTGGCAATGCAAATAGTTGTTATTACAAAGCATTATTGGCAAATGCAGCAAC…	yes	contig26601	contig_207			10.4752	-3.02293	-2.4362	4	1295	Non-Horn
contig26632_a531	TATCGTTAGGATGACAACGAAATTTATTTAAACTTATTTTTTTACGATTAAAGTAATTAACTTATGATGATTCAAAGGTTAATACTTGAAAATCTTTTATAATGACTTCACTTCCATCAACGTTTGTCCAAATATATAAACCAGGATTATTATGGCCATATTTATAAACAGTTGAGATTTTCCATTCGTTTTCATGGAAAACTTTTCCTACATATCTAGTAACACCACTTGGATGTTCGCCGGCTGAAACGATTTTATTTAAAAAATCTCCTTGTACAGCAACATTATTAATGTATTTCCAACGTAAACGTTCCGGTTCAGATGTACATAAAATCATAATATCTTTATTAAAGACTCGTTTCTTATTTAAAACATCTGTTGTAGYTGATTTGGATGTAG…	yes	contig26632	OtL011-B01			9.93851	-0.698946	-1.41967	3	640	Non-Horn
contig26737_a532	GGTTAAGAAAAACATCAGCAGCATTAGACACCACATAATGGATAAATTATGGAACATCACGTACCACGGCGAAGAAGTGTTAAAGGAGGACACCTTCATCAACAGCTCGATTGACATTTTAAACGATTTCGAGCAAGAACTAATAAAAGCGATAAAGAACCACGGTTGGGATGGAAACGAGGATTTGAACAAAGTCCAATGGAACTTCGCGGGGTCGCTATTTTACTCGATAATCGTCATTACAACAATCGGTTATGGTCACATAGCTCCAAAAACGCAATGGGGAAAAGTGGTAACGATCGTTTATGCAATTTTGGGGATTCCCTTAATGTTACTGTGKCTTTCGAATATTGGTGATATCATGGCGACGTCTTTCCGGTTTTTATACTGGAAGGTTTG…	yes	contig26737	OtL008-D05			10.3096	-3.03947	-1.76517	1	1027	Non-Horn
contig26765_a533	GGATTCCATCTSTTTCTATTCGGAATTGCAATCATGGTAAACGTACCGAAGCAAAGGCGCACGTTTTGCAAGAAATGCAAAGTGCATAAGTTACATAAAGTAACCCAATATAAAAAATCGAAAGAACGACATGCCGCTCAAGGTAGAAGACGTTACGATCGYAAACAACAAGGTTTCGGTGGACAAACTAAGCCTATTTTCCGTAAAAAGGCTAAAACCACGAAGAAAATTGTATTGCGTATGGAATGTGCCGATTGCAAGTATCGTAAACAAATCCCATTGAAGAGGTGCAAACATTTTGAACTTGGTGGTGACAAGAAACGCAAGGGACAGATGATTCAGTTCTAATCTGTATATTTTAGGACGTTTATATTTAAAATAAAATATAAAAAATC	yes	contig26765	OtP016-C02			12.3127	-1.53032	-2.09918	3	395	Non-Horn
contig26863_a534	ACAAATGATAACCACCAGCATAACCGTAGGCTGGGGCAGCTGCGTAAGTCTTAGCTACAACTGGAGATGAATAGGCAAGTGGAGCATGGCCAAGAGGAGCACTATAAGCTACAGGAGCAACTGGTGCATGAGCAAGAGGAGCACTGTATGCAACCGGAGCGTGGGCAATTGGTGMACTGTAAGCAACTGGAGCATGAGCGATTGGAGCACTGTAAGTTACTGGAGCATGAGGAATGGGTGAGCTGTAGGTTAATGGAGCATGAGAGATGGGTGCGCTATATGCTAATGGGGCGTGAGCGATTGGGGCGCTGTATGCAACKGGAGCAACTGGAGCGTGGGCATAAGGAGTACTGTAAGCACTGTATGCTAACGGGGTAGCATAAGATTTAGCATAAACTG…	yes	contig26863	contig_214			10.749	-0.401408	-0.474442	4	721	Horn
contig26879_a535	GTTTGTGCGAACAGGAAGCCRWYATTTTCGTTCYSCCAAACMGGCGGCGAACATTGCGCGTTTTCTCTTTTGGTGTGCGCRGCTTGGCAGCATTTGTTCGCGTCAGCACTGGTTTTTCGTAARAACGAAATGTTTCCCTAGAAAACCGAACGTCAACGTTGCTCCCCCATTTAARGAATGTGTTCTAAAGAGGCCCAGGATAACTCAKTTTGTTTAGTATGTAGWGGGCGAGTTGGAGTATCAACAAGAAATGCTATAAACATTTTTGGAAATGAGGTTATCACCTGTTCAAATCGTCCGTTAAACTTTGTAATATCACAAATATTAKGAATAGATATTCWAGAAAATACAGTACACTCGCTCATAATATGTAAAAAATGTTTTAAACTTGTCAATGAA…	yes	contig26879	OtP003-C01			9.32927	-1.37018	-1.80267	3	855	Non-Horn
contig26885_a536	AACTCTTTAAAGGCTTCCATCGCCTCTTTTTATCTTTATAAACTTTCGGTTCAGGGGTTGAGTTGCGAGAGTCTTTTATTGGAAGCTCGGGGTGAATCGAAGGGTTTGAGTCTTCATCAGGCTTTGGGGGAGGAATTGGGAGCGAAATTGCAGCTAATGTTGCAGCCATTGAAGCTTCTAACGCACTTTTCCCACCGGGGCTTGCACTCGAAGTCGTATTTGGCGAAACCGTCGATAAATTTGTTGCGGGGAAYGTCGTTAAAGGACTTGACTCATTGGGAGAAACATTTTTTTTATCCTCAGCTGCAATTTTATTTTTTATTTCTTCTAATTCCGGCGGAATCGTCCAACGGGACTCTTTCGTGTTAACATTATTRTAATAAATCTTTCCATTATCCG…	yes	contig26885	OtP006-D12			9.17968	-2.13574	-2.3071	2	755	Non-Horn
contig27016_a537	GGTTTCCCCTCACTATCTCGTTGTATTATTTACAATAGCGAGTGGGCATCTGACGCGAGTTAATTGTAAATCTGAATGGGTCTGAATAGAACTGACCAAGAGGCTGTCGTGACGTATCCGTATGTTATTGTATTTTGTGCAACTTGAGCGTTTAATATCGAGATAAAAAGCAACAAATAAAGATGAGTTCAAGTACGTGTTACAAGTGTAATAGGCAAGGTCATTTTGCTCGAGAATGCAACAGCGATGGTGGTGGCCGTGATAGTTTCAGCGGTCGTGGTCGCGAAAAATGCTACAAATGTAACCGTTTGGGCCATTTTGCACGTGATTGCAAGGAGGAAGCGGAACGTWGCTATCGTTGTAATGGCGAAGGTCATTTTGCAAAGGACTGTAAGCAAA…	yes	contig27016	contig_329			12.1844	-1.531	-2.0228	3	1180	Non-Horn
contig27021_a538	GTCGTTTACGAACGCTTGTTAGCTTCGAAGGTATCGTGCTGATAAGTTTATTGAAAAAAGTTTTTAATCAAATCCATTTTTTGTACAAATCCTGCTTCTCCAATGACGACTTACTTCAGTTATCCAGATCAAGCTCTCCAAGATGAGCTTCGCCGCATTGCAACGGCGATTACAGCCCCTGGAAARGGTATTTTAGCTGCTGATGAATCTGTTGGARCCATGGGGAAGCGCCTCCAAGGAATTGGGTTAGAAAACACCGAGGAAAATCGCCGCAAATACCGCCAGTTGTTATTTACAACTGATAAAACGATTGGGGAATCTATTTCTGGGGTCATCTTATTCCATGAGACTTTGTACCAAAAAACTGATGAGCAAGTCCCATTTGTTGAGCTTTTAAAG…	yes	contig27021	contig_319			11.2535	-1.88364	-3.84762	4	431	Non-Horn
contig27026_a539	GAGATATAAACATCCACGTGACCCGTCGAGACGCCAGTCGTCGCTGGTTGCGTCGTCCTTTCAGTATTCCAAATCGCGTCATGCGTTTCAGTTGTTCGAATAGTTTCAGTCGTTCGAATAGTTTCCGTCGCGATAGTGATCGGATGTGAACAAACAACTATAAAGTAATAAATAAATAAAATAAAACGTAAAGTGTTGTAGTAAAATTATCAAAAATTTTCATTGTGATGGTTTAACCAAGAAAATAGGACTTGTACAAAAATGAGTTCGTATCAATTCGTTAACTCTTTAGCCCAGTGTTATGGCCAACAGGCCCGATCTGGTGATCAAGYTTCAAGTCCTGGAGCTGATTATTATAATCCTAACGCTGCATCAGCGGCTGGTTACCCACCGGCTTGT…	yes	contig27026	OtP008-D05			8.75701	-0.9673	-0.420086	4	1161	Non-Horn
contig27109_a540	TGGCTGTAACGCTTGGTCTTCCTCCGGTTCTACTCCCCCGCCGGGTACAACCCATCTTTCCGGTTTACGAGAAGATGTCACTAGCAAAACCTCAGTCTCTTCATCAGAACGAACACATATGCAGGCGGYACGCCGCCTAAAGCCTTCGTCGTCGTAAATACGGATGGAATTCGGTTTTTCTTTGACCATTTTTCGTGGAGATGTTGAAAAAATTAAAATGTTGAACTGAGAGGGGCAACAACAACAACAAACCGCAAAAAGAATACGTAACACAAATCAACGGAGACTCTAAACGATCTATTCAGACAGCCATTGCCGTTGAAATTATTTTATCACACTTTTACTACATAACGATTTATCCATTTTAACCTGAGCGTAGAAACATTTACAGATTAAAAY…	yes	contig27109	OtL013-H10			11.3698	-2.22589	-1.90696	3	600	Non-Horn
contig27133_a541	TTTACGATTTTTAAATACATTTTTACATTTGATCCAAAATTTCCTTTAAATCCAACATTAAATCATCATATGAAACAAAATTAAAAAGAAATCGTTCTAAAATTACCAAAAACCGTTTCCATACCGGCATCGATTTATTTTAGGTATCCTATACATTCATTCTGACTCATTCCTCCTAAACCTTTTTGTGTTTCTGCTACGTGGGTTTAACGGAAATAAAAATCCGAAAAAAGAAGTATTCAATCTAAGAGTCCTCCTCAAATGACAAAGACAGTTAAAARMWAAATTGGAATGGCAGATCCACGTATAAGGACATTAAAAATTAAAACTGGCATTGTGAGAAGATTAGCGAAAGAAAAGGTAACGTACGAACAAGAAGCTGATGGTCAAAGGGAACGT…	yes	contig27133	OtL018-D01			10.6382	-1.11881	-1.87085	3	935	Non-Horn
contig27141_a542	TCGGGACTTAATGAATGGGGATTCCCTTATAAAACACCCTAGTTCTCTTTTTTCTCATCATCTTTCTTGGCAACCTCTTCTTTAGAGGCTTCATCAAAGTTCTCCACCAAATCGGGTACATCTTCTTCGTCCTCCGGAACGATCTTCCCTAAACTACCAACRTTACCCACCGAAGTAGCCAGCCGTTTCAATTGGTTAATCCCTTCGGATCCTAATTGATTCAAAATACCGGGCAACATTTCTGTAATTTGTTTCGTCTCACCATGACCGGTGATAGCAAAAGTATTCGCAGCTAACGACGCCTGGGCCTTGGGATTATTAAAATGAATTACAGTGCCATCGTCCTTCATCATATTAACCTCTTCAATACCAGGAATCGTGTTCACACCTAACTTTTTC…	yes	contig27141	OtL017-H05			12.6527	-1.87875	-2.02257	3	730	Non-Horn
contig27195_a543	CAGGTTCGTCTTCCTGTTTTCTTATTCGACTAGATGTTCTTCTTGGAAGGTTTTCTAATAGACGTTTTCTCGCCTGGCGTTCTTTTTCGCGGAATAATCTCGGTAGTTCGGGTAAAAAATTTTCTGTAAGCGTACCGTACAATAATCTTTCTGCTTTAGACTGTGAACTTTTGATTTTTTTAGTTAACTGAATCCAATCGTCTTCGGTAAAACAAACAACTTGCCAAATCGATTTATCTTTTTTGCTATTTTTATTCTTCTTAAAATCTTCTCGATACAATCTCGTACCATAAAAATACCAATAAGCGGATCGGTTAGCGTCGTAGCCTAGCGGTTCGACACGAAGGCTGCCAGCTTCTAAGTTCTTTAAAGCYTCGAGTACGTCGTCTGCGTCTAAAC…	yes	contig27195	OtP018-E09			9.30369	-1.4683	-1.22106	2	802	Non-Horn
contig27242_a544	GCTTTAAAAAAACACCCCCCTGTATAACTTAGACTTAAGAATGTTTATAGATAGGTAATAAAAATCATTTAAAATAGTTACCTTGGTGTACAGCAACAGTGCACGATTGTCCATCACAGTAAACAAGCGGATTTTCAGGCCATCCTCTATCATCAGAACAAACACAACACCCTCCTACCATCTCCTTCATAATGCAGAACCCAACTCTTTGCTAAACTRGCGAACAGACACCATCCCAACCTAACATTGTACCCATGGCACCAAGAAAAACCCGAAAAAACGAGAACATCTCGGAATTTAACTTTAAAGCCATCCTACTCATCCGAGCGAGTGAAAACGATAAATGAAGAGGTGATGTTGATCACCTCACTGTAAACCCTCATCATTACATAATTTTAG…	yes	contig27242	OtP011-C05			8.23275	-1.71482	-2.18445	2	712	Non-Horn
contig27327_a545	TTTTCGGCTTTCTATCGCTGTTAGTAAAACCACAAAAAAATTAATAAAGGTAATAAATAGGGCGGACCGTTTTTCTTGATACTTGGATGTTGTTGAGTGTAGCTTGCAAACGTTTGATTCGCAGTCGATTTATTGCTTAAACAAAGGTATTGTAACACGACTTGAGCTATAAACAAATCTGCTTCGCAACGGAATCCTTGCGTTCTTTGGAATTCGATTAAAAGGCGAGCGCATCCTTGGCCATCCTTTGAATGTAAATAATGATGTCTTGCTTGTATATAATTTTTTTCGTTCCAATATACTTGAGCTATACTTTGATGAAGAAATGGGTGTCCAAATTTACCATCTAAGGAAGACCATCTTATGGTTTTAATAATAAAAGTGTCTCTTTCGGGCGTT…	yes	contig27327	OtP012-C01			9.60676	-3.21028	-2.20121	0	804	Non-Horn
contig27329_a546	GGGGATAAAAATAACAAAGAAACAGATATTTTAAGACAATTAACGATGGTCTTTACAGCTGCTTTTGATGCTTCGGCGGTTTCAATGTCTTACATGATTTATTATTTGGCGAAATACCCCGAAATCCAACAAAAAGCGTACGAAGAGGTTCACTCAATCCTCGGCGAAGACATCCACCAAACAATAACGAACCAACAAATGTTAGGGATGAAATATTTAGATTTAGTCATGAAAGAATCGATGAGATTAGGCCCGGCGATTCCGTTATTCACKCGAACACTCGAAGAARATGTRTTATATACGARRACACCGTGTTACCYAAAGGATTAATGGTTCTTATGATCCCGTTTATGATGCATCKCGACCCTGAGTTATATCCGGAACCTGAAAAGTTCATTC…	yes	contig27329	OtL007-D07			8.66783	-1.96494	-1.14539	4	697	Non-Horn
contig27357_a547	GACTCTTTCATATACGTGTCCCCGTTTGAATTTGTTTTGAAAGTCCGCGATTATTTTTGGATAATTTCTAAAGTTATCGCTTAAGGTGAAGGTTTGTTTTCAATTAACATTCAATCATCTTCGCGTCGGCTGCCTTCAGAACCTCTTAAAACTGCATTCCCCGCGTTAACATCAAAGAACACCCCACACATTTTTTAGGTTATCATGAACTTACTAACCCATATTGCAATGTTACTCTACTTATTTTCTTGTATTTACGCCCAACGTGTTCCTCCCGGTGTAAATCCTAATCATTATCAGCAACAGCAGCAATTTCAACAACAACCCCAATATCAACAGCAACAGCAGCAGTTCCAACAACAACCTCAATATCAACAACAACAACAGCAACCACCACAA…	yes	contig27357	OtL011-G05			9.9738	-2.35694	-3.07579	3	762	Non-Horn
contig27377_a548	ATAAAAGACAGACAGCAATTGAAAGATAAAGTGTGATTTTCGTGCTTTTATGAAGGCCCCAGTGAAGAGGCAGAGCGTTACCACTCGTCCCCAACTGAACGCTGTTKCCTCACCGAACTCCAAGTACCAAAGCAACATGGAGGATTTGGTAGTTGAAGTGAGCGGCGAAAATGGTGCCCTTTATAAGGGCTACGTTTTGGACGTTTTTGAAGAGGAGGTGTTAGTACATTTTGAAGATGAATGGCAGCCTGACTCGAATTTTCCTTACTCTAGGCTGCGATTTCCACCTAAACCTGATCCTAAGGCGGAATTTGTTGAGAATCAAGAGGTGGAGGTTTATTCTAGGTCAAATATGCAAGAAGCTAATGGATGGTGGAAATGTCGAATTAAGATGATGAA…	yes	contig27377	contig_116			9.68381	-2.32852	-2.12008	3	835	Non-Horn
contig27378_a549	GGATTTGTCAAATTTCCTGTCAAGAAACTTAACCTCATTTTACATCATAATTATAATTTCATTTAAAAACATGTTAAAACCGAAAGCGTTAACGCAAGTTTTAAGTCAAGCGAATACCGGTGGGATTGAAAATACTTTGTTATTAAATCCGGAAGGTGCTCTTTTGGCTTATAGCGGTTAACGGCRATAAAGACGCTCGCGTCACCGCCGCTATAGCTAGCAACATTTGGAGGGCTTACGATAGAAATTGTCAAAATGTATTTCGAGATGATCACCCCCAAATGATTTTGATGGAATGTATGGAAGGTAAAATCGCAATAACACAAGTGGGGAACGTCTTGTTGTGTTTATACGCGAAAAGTAACGTTGGATTTGGGATATTGAAGCAAAAAGCGAACG…	yes	contig27378	OtL013-F06			8.97143	-1.79983	-1.66176	3	1030	Non-Horn
contig27425_a550	AAAATTAATTCGTTAAGATTTGAACCTGGCGCGTTAGTGTAAATTGAAAACGAGAAAAATCCCKATKATAAAAACGTCAAAACTTACTAAACCAAACCCCAGTAATCTCAACAAAAATTTGTCACTGTTTTGTAGGTGTGGTATAGGTGTTTTATTTGCGTTCGGTACCGTTTAAATCATTAGTGTGGCCCTGTAGTAGTTAAAATTCAACGCCTAAAATGAACTCGAGACTACCGGCGTGCGTTATCGACGTCGGARCCGGTTACACCAAATTAGGGTTTGCGGCCMACAAGGAGCCCCAATTTATTATTCCCTCAGCAATTGGCATYAAGGAAACCGCAAAAGTCGGTGACCAATCCAGTAGGCGTCTTTGTAAAGGAGTTGAGGATTTAGATTTTT…	yes	contig27425	contig_40			9.36581	-2.29305	-1.64744	4	1516	Non-Horn
contig27432_a551	AAAATCATGAGCAAAGACGATGGGAAATCTAAAGGGTTTGGATTTGTTGCGTTCGAGGACCCCGAAGCCGCTGAAAGAGCCGTGCAAGATCTGAACGGAAAAGAAATCGTAGAAGGAAAAACGATGTACGTTGGGCGAGCCCAAAAGAAAGCCGAGCGCCAACAAGAACTAAGGAGACGTTTCGAACAATTAAAACTGGAACGCATGAATCGTTACCAAGGCGTCAATTTATACGTCAAAAATTTGGATGATACTATTGACGATGAAYGCCTTCGTAAGGAATTCACGCTTTTTGGAACAATTACATCAGCCAAGGTTATGATGGAGGAAGGTAGAAGCAAAGGATTTGGATTTGTTTGTTTTTCATCTCCAGAAGAAGCGACTAAAGCTGTAACGGAA…	yes	contig27432	contig_179			14.1127	-1.95479	-1.96194	3	952	Non-Horn
contig27435_b889	GTTGGTAAAGTAGAAATCGCACAGKKKMYSGRSCTTTTTTCCGGTGTCTCCCGAACTAGCACCAACTGGTCGTGCACGTAACTTAAAAATAATCTTTAATCATCCCAGAAAAATGAAGATTTTCAAGGACATCATCACCGGTGACGAAATGTTCTCTGATACGTACAAAATGAAATTAGTAGATGAAGTAATTTATGAAGTATATGGTAAACTTATTCAGAGGACCCAAGGTGGTATTGAAATAGCTGGTTTTAATCCATCGGCGGAAGAAGCTGACGAAGGTACGGATGAAGCCGTTGAATCAGGCGTTGATGTCGTTTTAAATCACCGATTGGCTGAAACTTTTGCATTTGGTGATAAGAAAAGTTACACTTTGTACCTTAAGGATTATATGAAGAA…	yes	contig27435	contig_5	contig_222		12.5523	-1.79271	-1.71527	2.5	948	Non-Horn
contig27476_a552	GGGGCGCAAGGTCGGTCAAATCACTCACGCGAATATCGGGAGTTACACTTCCGTGTCATTCCTATATTCTTATTCCGTTTAATGATAAATATATCATATCAGTAGAAAAACTAACATGGTAGCCGTCATTAAAAAGATATCGATAGCGAGAAGTTTTTAAAAACATTGTTGTTGAARGAGAAGGAAAAAGATTGTGAGTGCGTCACATATTGTCAGAAATAACAAAGAAAATATTGAGTAAAGACCCCATACCTAGAAGRCAGGGAAAGTATGAAACCATAACCTGTCTCCACCTGTTTTTCGAACTCTTCGAGGCAGCGATTTTTTTTATACGAAATCTAACCATGTCGGATAAAACCGTTATTAAGGGCAACCCGTCCGAATATGTAAAGTTAAATG…	yes	contig27476	contig_344			9.61082	-3.18028	-2.78551	3	1439	Non-Horn
contig27482_a553	AAAAAACTTATTTATTGATGTCACTTGAACCGAAACTTCATTTTTAGCATTTTTATATTTGCAATAACAAATAAGAAAACAAGGCCGAAACTTCCTCAAAAAATAAAATAGTAGCTTACAAAATATAATATATTAAATAGTAGTACTGYTTTTAGAGGATTAACAAAGTGGTTTGTGATTGTAATTCATTGCTTACAGTCCTCCGCGAAGAGCTAGAACTAAATGTAACACTGAGCCACCCTGGACCTTGTAGTCTTGGGCTGTTTTTTCATCATTCATTTGTTTTCCAGAAAAAATCAAACGCTGTTGTTGTGGGGGTATTCCTTCCTTTTCTTCCACTCTTTCTTTGATTCTTTCCACTTTATCMGKGGGGTTCAATATCGATTTCAATTTCCTTAC…	yes	contig27482	OtL019-G06			10.3855	-2.72613	-2.9598	0	583	Non-Horn
contig27539_a554	CAGAAGATAAATCCATATTACCACATATTAATGGAGACATTGAATTTCTAGAAGCAGGACTTAATGAATGACAACTGCCCATAATGTCATTTGCTGATGGTGTTTGCGTATTGACTGAACACATTACCGGCAGTGGAGCACGGTGACCTTCTGGTGTTGCTTGACAAAACTTGTTGTCATCACCTCGATCGCTATAAGGCAAATCCGCCTTGCATGATTTGAGCACCAACCGTTCAATTTCCTGATTAAGTCCCTCAACAGAACTGCGCATCGCCTGTTTTGGGAGTGGTTTCACCGGGATATTTACTGGATTGGCTCGAAGCGGTGGCGGCATCATACAAGAGGTATTTGTTTGAGAGCTGGTTGTAAGTGTGTGATCGGCTGTCACAGGCGAATTAC…	yes	contig27539	OtP009-G05			10.5103	-1.4982	-2.58976	3	662	Non-Horn
contig27575_a555	CCTTCGCTTCGTCTAACCGACCTAATGCTTTAAGTAGATTACCCAAATCACTTCTTACGCAGTACAAATCTGGATTATATTGTAAAGCAGTAATATAAGCYTGTACTGCTTGTTCCATATCACCAGCAGCAACCAAAGCAGCCGCTAAGTTAATGTAACCATCAATAAAATCAGGTTTCAATCTAACGGCATGTCTGTAGTTATCCAAAGCTTCGGGAAGTTGTCCACGTTCTTTGTATACATTYCCAAGATTACTATAGGCTTCTGCTAATAGTGGATTTTGTTTGATTGCTAACGTGCTAAAATGTGCAGATTTATCCAATCTTCTACATTGAAAATGAATGCTGGAGAGCAAAAGTAACACACCAGTGTTACTTTGATCTTGTCTCCACAATTGCA…	yes	contig27575	OtP020-D08			10.4126	-1.50215	-2.36246	1	780	Non-Horn
contig27589_a556	GCTACCAATTTTGAAGACGGATGAACCAGTGTGTCCAGAAGGAAAATTATCTTGCGGAAATGGAGACTGTGTCGATAAAGAACTTTTCTGTAATGGAAAACCCGATTGTAAAGATGAATCTGATGAAAATGCTTGCTCTGTTGATACKGATCCAAATAGAGCACCAGATTGYGACCAAACTCAATGCGTACTCCCTGACTGCTTCTGTTCTGCTGACGGAACGAGAATCCCTGGTCAATTGGAACCAGCAAATGTACCTCAAATGATAACTATAACATTTAACGGAGCCGTAAATGTCGATAATATCGATTTATACGATGATGTTTTTAATGGCCAAAGATTAAATCCTAATGGCTGTTCGATTAAAGGAACATTCTTCGCATCGCATAAATACACAAA…	yes	contig27589	OtP013-B11			12.6985	-0.971199	-1.75576	4	1460	Non-Horn
contig27684_a557	CCTCCCGGCGGTCCCTGCGCACCTTGTGGGGGAATTCCGCCTGGGGGAAGACCTTGAGGAGCCCTTGATAACCGCTGAGGAGTTCCGGGAAGTCCTTGAGGACCACCTGGTAGTCCTTGAGGAGCACCTGGTAAACCTTGAGGACCTCCCGGTAACCCTTGACCGCCTTGTGGACCATCCGGAAGACCCAAAGGACCTCCAGGAAGACCTTGCGGCCCACCAGGAAGACCTTGCGGCCCACCAGATAAACCTGGCGGTCCACCTGGGAGCCCTTGTGGAGCTCCAGAAGGTCCACCAGGGGGTCCTTGAGAAGCAGTTACATTCGGTGGCCCCCCTGGATGTCCTTGATGATGAATAGGMGGACCTTGGGGGTGACTTCCTGGGTGTCCAGAACCTGGT…	yes	contig27684	OtP019-G05			9.17484	-2.5986	-2.28812	2	857	Non-Horn
contig27687_a558	GGACAGTTGGTTGTCGAAGGTCTTTGTCCGCCGAATTTCGATTTAACCGTAATACTGGTTATATTCTAAATTCTCGTCGTTTTTAAGAAAACCTTTAAAGCAAAATGCGTGAATGTATCTCAGTTCATGTTGGCCAAGCGGGCGTCCAAATTGGTAATTCTTGCTGGGAATTGTACTGCCTTGAGCATGGCATCCAACCCGATGGTCAAATGCCCAGTGATAAAGCCGCTGGAGGAGGAGAYGACAGTTTTAATACTTTCTTCAGCGAGACTGGTGCTGGGAAACACGTTCCACGAGCAGTTTTTGTTGATTTGGAACCCACAGTTGTAGATGAAGTAAGAACTGGAACATACAGACAACTATTCCATCCAGAACAACTTATTACTGGCAAAGAAGACG…	yes	contig27687	OtL007-A04			13.7374	-1.45789	-1.5852	1	799	Non-Horn
contig27706_b890	GGGATCGGCCGAGTGGGTCAATGTCTGCGCTCGTGAAAATTAATGGTGGTGAGGTGAAACCCGTGGCGTGTCGAAAATGGTTTAACGCGAGTTGTGCCGTTCCGGGAACGCAGTGCGGGCCGTTCGATTAAGTGTCAGGTGGAGTCCGGTGCGCCCCCCGGACCGTTTTATGCGGCCATCCCGAACTCTCGACGAGCACCAAGAAACTTTTGTAAAGAGGCCACACACAAGCGAATACGATCGACGCTCTCATACTTTTGACGGGAGTAAAAGGAAGATCTCGTCGAGCAATGTAACAGGAATAGAAATAATAAGTGCGAGGACTATCGTTTTTTATTATCATTCTTTTATTCCGTTTCTATACTGAAAAAAGAATAGATTCGTGTCGTGCGTTGTAGC…	yes	contig27706	contig_107	OtP019-C08		9.80682	-1.68289	-1.80883	2.5	766	Non-Horn
contig27710_b891	GACAAAAATGCATATTTATTCATACTTAATAGGTACAGCTTTAATATGTTTTAAAATAAAAATGCTAAGATGCAGTTATATAAGCCAAATATTTAACACTAAGTCAATTGTTACTACTAAACARCATGCAGCAAAGACTAAAAGAATAATTTTTATGTGCTTTTACCTGCATATTTCACTTCATCAAAAGCTTTTCTCGCTTTTTTCAGTTCCTCATTCATTGTTAGTAGGTCTTTTACCCTAGCATATTTTCGAGGGTCTTTTCGTACTAAAAATACTATATCTTCAACTTGTACTCGACCTGTTCTTCCAATTTCCATTGCCTTATGAGTCATTTCCGTAATAAACTCAATCACTAAATCTTCTATAATATCAACACTTTCTGTGTAAGGATTTTGA…	yes	contig27710	contig_12	OtL005-B06		10.7966	-2.60331	-1.98995	2	556	Non-Horn
contig27717_b892	GGGGAACGCGGACGGGCTCAAACCGGTATCCATGTGCACACGGGCACAGACTTGACTTTTCCAATTGGTTTTATTCTCATTCTTCCACGGGTCCCTCCTCCTCCGGGGTAATGCCAGCGCGGGCCGCCTCCGGAACTCCAAGAGTCTGGCTTCGGCAGCCATCGCGACCACACTCACCAAAACACTACAAAACCCAAAGAATCAGCAACGAATCCAATGAAGAATAAGAAAAAAGAAGAAAAAAATTTCTTCTGATTCTTCATTAAGTTTTCCAAAACTTTCTTCAGTCATTTTTTCTTTATTTTAATCATTTCATTTAGAGGAAAGACTTTTACCAGTTTTTGATTAAGTGATTTTTCCACCGCGAGTGATTTCCAGAGAAGAAATTTTAAGATGGTT…	yes	contig27717	OtL011-E06	OtP003-C05		8.27263	-1.87871	-1.56723	3.5	825	Non-Horn
contig27774_a559	TGATCGGAGTATTCCTTAGGATTAATTTTAATGCCTGCTTTCGCTCCACCGAACGGAACGTCTACGCAGGCACATTTGAAGGTCATCAAAGCGGAGAGGGCCTTCACTTCATCCCGAGAAACATCCATCGAATAACGAATACCTCCTTTACACGGTGTTCTATGCTGACTATGTTGCGCTCTGTACCCTTTAATCATTTCGTATTCTCCCTTATCCCTTTTGAWGGGAAACGCAATTTCAATAACGTGATCGCACTGTTCCATAACCGTCAAAATACCCTTCACCTTAGCCTTCCTTTGGGCCAAATCCAACCTCTGACCCTTCCTATACTTCAAATCTTCCACCAATTTATCCTCGACGATTATACACGCCTTATGGAAAAAGTACTCGACCATATCG…	yes	contig27774	contig_136			10.5321	-1.65633	-1.96215	2	710	Non-Horn
contig27794_a560	CAAGTTCTGTTTGGCTGTGTCCGGGACGTTTATGACAAACCTCGCTATTAGGTCAATCAGCACGTCCATTGGTATCGAGTGCTGCGTGGTCCTTAATTCTACCTCCATATTATATTCCATCGTTCACATTTGTTTAATTAATATTCTGGAACTGGAATAAGCGCGAAAATTCGGCCTTTGACTATGAAAATTGGTTGGAAAACACAAATTGCGCATCGCTTCGCTTTTTTACGACCGACATCTTTGTTTTGATTCC	yes	contig27794	OtP010-D08			9.59863	-1.37459	-1.35785	3	256	Non-Horn
contig27823_a561	GGTAAATAAATAAAATGCGTATTTTATTAAATAAGAAATCACATGAAAAAGATTTACAATAAAAATTAAAACAATCTTAAACAGGTAATGTTGTACTAACAGTTTTTGAAAACATCTTTGAAAAAAATGATAAACCTGTTGCTCCACCTGGTATGCTAGAAATAACAGTCCAAAGCAAGGTTACAATCTGTCCGACGGCGAATAATACCGTAAAAGGAGTACTTTGCAGATGCAAGGCGAAATATAAAGTACCCACGAGAGTTGTTCCATAAATTAATGTTAAAAGAAGACGTTCCCTCGAAAACATATGTTTTAAATGTGCCATTGGTCCCCATAGAAATGAAAAACTCATAATAAAGAATAAACTTCCTAATGTAAACAACAAAGAAAATTTTCTTG…	yes	contig27823	OtL017-B01			9.09171	-3.69028	-2.60053	2	754	Non-Horn
contig27914_a562	CATTATTGTTATTGATTGCATTGCTTGTACAGCTTCTAAAGTACCCGATTCATCTTCTTTCACTGATTTATGTTTTTTATGTAATTCTTCTGCATATTTACTAACTTCCTTGACTAGATCAGTAACCTTTTGTAYCATTTGAATATGAAGCAGGGATAACTTTTCTGCAAAGGCCTTAAGAACCTGCCAAAGAGGCGCAAAAGTTCCTTGAGTACAGCAGCTGCCTGCTTGTTTAGCAAGCTTAGCAAGTAATTTGGAGTTGTTCTCTTCCAAATTAGAAACTTCCCTGAGGAAGTCGGCCAATTCTTTGCTTGCAACCAACCCATATTTCATGTTATGATAGAGCACGTCGAACCCATTGTTTTTGGCCCCCCAAAAGTAATCATTGAAGTCCACCGT…	yes	contig27914	OtP019-C09			9.20768	-3.15679	-2.04113	1	695	Non-Horn
contig27947_a563	GGCAGATGATTGGAGGAGAGAGGAATTTTTTGGTCAGTCGATTGTGTGTGTGTATAGTAAACTCAGTAGTCATATTAGTTGACTTCGTGAACGACGTGTAGAACTTTCTAAATATTTACCACTTGAGTAAATAGATAAAAAGTGCAASTAAAAATATAAATATTGATATTGTTTAAACTACTTAAAATAGATTTCATATATCTTCTGACATTTATTCTTCAAAATGTTCAACAACCAAACTGGCRTATACTCAATTGATACTGGAATGTGTTATGATAATAAAATAATGACGAGTTCAGTGACATCTATCGGACCGATTGAAGAGTCCACACGATTGGCTACAGCTGATTGCCGTCAAACATACAACGTCAAACGAAACTTGTTAAAACCTACAGTAGC…	yes	contig27947	OtL018-H01			10.0188	-2.00159	-2.44092	3	905	Non-Horn
contig28107_a564	GGGTTTCMACCATGAACTAACCTAAAATCTGTCAAGTAATCGTTAAATATCTATCAAAAATGTCTAAAAAGCGCAATYTTCTCCTAATTTTCTTAATAATTCCTTTAATTGCATATACAAAAGCTGATTTAAACGATCAATCCCAAGAAAATGACGACAAAGAACGCTATATAATCGAAGGAAAAGTGTAYCCTTTCGACGCCCCATTTTCTCAACAAAACTGGCAAGCAAATACAAAAATTCAATTAAACGGTGGTGAGTACTTGGGTTTTGTTAAAGAAGACGGCTCATTCATCGTTCATAACATCCCATCGGGATCATTTATTCTCGAAGTAATAAATCCTGAGTTATCGTATGAACCTGTTCGTGTTGAGATCAATTCTAAGGGAAAATACCGAG…	yes	contig28107	OtP012-F10			10.194	-2.26858	-1.85149	2	894	Non-Horn
contig28128_a565	GTAGACGAAAACGTTTCCGGAATTCCCGAATTTTGGTTAACGATTTTTAAAAATGTAAGTCCCTTATCGGAAATGATTCAAGAACACGATGAACCTATCCTAAAATCGTTGATAGATATCAAAACGATTTTTGTTGAAAAACCCATGGGATTTATCTTAGAATTTCACTTTTCCCCCAACGAATATTTCACCAACACCATTTTAACTAAAGAATACGATATGAAATGCGTCCCAGAGGAAGATGATCCGTTCAGTTTCGAAGGTCCTGAGATTTTTAAATGCCGAGGTTGCACCATTAACTGGAATAAAGGTAAAAACGTAACGTTGAAGACTGTTAAAAAGAAGCAAAAGCACAAAAGTCGCGGTTTGGTTCGTACCATAACCAAAACCGTACAAACG…	yes	contig28128	OtL018-F11			11.8911	-2.01441	-1.43729	2	1038	Non-Horn
contig28155_a566	ATCATACAAAAAATAGTCTGATCTTAAATTTTACACGTAAGTGTAGGGTGATGTATATGCAACAGGGTTAACAACAGGTTGTGGGTAAGAAAATGGTGCAGCGATTGGTGATGTATAAGCTACGGGTGCAGCTATTTTAGGAAAACCGGGAGCTGGGTAAGCAACTGGTGCAACTTGATGTACAGCCCTTGCTAAAACAGGTGCTACTGGAGCAGTAATAGGCGCAGGAACTCCAACTGGTGYAGCAATTCTAGCAGCAACAGGMGCAGCCACAACTGGAGCTGCAACTCTCGCTACAGCTGGTGCAACAACAGCTTTAACTTGAGGTCCTTTACTAACAACAGCATTGAAACCATTTAATGGATCAGCGGTGTAATCCACAGTTCTTCTTGTACCATC…	yes	contig28155	OtL018-D08			9.31415	-0.937483	-0.504253	3	685	Non-Horn
contig28321_a567	GCTTGTATGAGGGTCACGTGTTTTACACACGTGKATCACAGCCTCGATCGATAACTGGGAAGTATCAAGCGTGTTCGTTGCTGGTAATTGAGGTTGGTTCATGATAATTTCTTTTGTGGCAACGTCCTTCCCTTAGTTCCTAATAGCCAACCTCATATTGGCATGGAAAGTTAGAAAAGGAAGTGCGAATAGTTCCCAAGTGAAAAACGCCCAAAAGTAAATACGCGTAGAAAATCCAACTTTTAGTTTACTTTTAGTGACAGGTCACCTTGGACCTTTTCTTTTAATTCGTATCGGGGGGGCCCCGTAAATTTGATTCTTGGTTTTTGAGAGAGGTGTTTAAACTTTCGCAAAAACGGGTCACAAAAGCGAAATGAGCGACGACGATAGGGATATCGA…	yes	contig28321	OtL005-B11			9.66019	-2.03646	-2.17914	2	1011	Non-Horn
contig28359_a568	TGGCATGAAATCTGTGATACACATCTGCTTCTTTTCCTTCGTAGCTTCGTTTTCTKTACTATTTTCCTTTTCGGAATTGCAATCTTCCCTTAGGCAATTTGAGATGAGCTCTTCAGGTTTAAAGTAGGCCATATCAGCTTCGGCGATTTCTTCTTCGCTAACATCAACGGGCCTCTTTTTAACGGGAGCGTGTACAAGTTCGCAACTCACGTATTCRTAATTGGTGTTTGGTCCGGAAAGTGGTATCCCCTTATCGAAGTCGAAATTGTATTTTTTGCTTTGCGCTTTTTGTAGTTCTTTTAGTTCCCTTGCGACGAATCTTAGGGCTTCGTCCTTGGCGGGTTTTCCGAAAAGCATTCTGCGTGCTTTTCGGACGTTCATCGGTTGGAAGGGCATCGG…	yes	contig28359	OtL007-H04			10.0402	-0.639868	-0.509947	4	702	Non-Horn
contig28498_a569	AAAGCCGATGAGAAGTTGAACTAAGATACAGTTTTCATTTAGTAGTTGTCTGTAAAGAACCAGTTTTTTGGTGTTCATAAAAAGATAAAGATGATTTCTTCTTTTATTAAAAATAAGATGATTTTGTTGATGGTACTTTTTGGAATTTATCAAATCGARTGTTCCCCATCATTTTATAATCCATATTACAGAACTTATCCATATGTACAGTCTTCCTATCAATATAACATTCCAGAAGTCATCCCTCAAGCGATACCACCTCCACAAACCTTTTACGAAAACGTYCCAATTTTACCACCTCCATCACTTTTACCACCCTTAAATATCTTGGCGGAATCACCATCGTCGATATCAACATCTTTCACCGTTGTACCGATGGTTTTGGTTGCAAAAGAAAAT…	yes	contig28498	contig_275			13.1208	-0.244875	-0.421903	4	1252	Non-Horn
contig28567_a570	GAATCCACGCCATTTACATTTTTGTCGGTGTTTATTTATAACTTTCTTAACTAATTTTTCCTGTAATTAGACGATGGCTGAGTATTTAGCTTCAATTTTTGGTACCGAAAAAGACAAGGTAAATTGCTCCTTTTACTTTAAGATCGGCGCTTGTCGACACGGCGATCGATGCTCTCGAATTCATAACAAACCAACCTTCTCTCAAACATGTTTATTGCAAAATTTATATGTAAACCCACAAAATTCAGCAAAATCTGCTGACGGAAGCCATTTGGTTGCTAATGTTTCTGATGAAGAAATGCAGGAACATTACGATAATTTCTTTGAAGATGTTTTTGTGGAATGTGAAGATAAATATGGGGAGATTGAAGAGATGAATGTTTGCGATAATTTAGGGGA…	yes	contig28567	contig_65			9.53009	-2.0546	-2.06193	3	871	Non-Horn
contig28585_a572	GTTCAATAATGGTTGGAATGGGAAAGCCGTACATGCCTTACGAAGAAAAACAAATAGTTGATTTTATAATTGATCATCAAGGATGTGCGCGATTAAAAGGTGCTGTTTTTTTGGCAAGAAATGGAATCGCACATAAGTGATCGTACGTGGCAGTCGTTAAAAGAACATTTTCGTAAAAAAATCTATCCAAACATACATTTTCCACGGTTTGGTTTGACCAGTGAACAAATTAGTGAGATACGAATGTGTTATAACAAGAAACGAAAAACGAATCAAAATATAACAGATCACCCACATGCGCTACCGGACTTTTATGACGATGATATTAAATAACTTTTAAAATTTAAAAGGAAATTAAGATTTAAAAGATGTACAACACCATCTATAATTTTCAATGTC…	yes	contig28585	OtL017-H11			8.69956	-2.80173	-2.26759	4	1031	Non-Horn
contig28672_a573	GGCCCCAACCCATTCAAAATGCAAACCAAATTATATATTTTAATTGCGACACTTTTTGCAGCTAATGCTGCACCAGCACCATCAACTCCTGAGTTAAAAACACTTCCAAGTGCACAAAATTCAGTTGGACCAACGGGATTACAAGGTGTATCTATTCCAATTTCACCAGGCACTTTATATCCATCCGCTTATACGCCTGATTTAACTGGAGTTCAAACACTACCTTCAATTCCTTTAAATATTCCCTCCTCAATTCCTTCATCGTTCCCTTCAACATTCCCTTCAACACTCCCATCATCATTCCCTTCATCATTCCCTTCAACATTCCCTTCATCATTCCCTTCATCATTYCCTTCATCATACCCTTCAATATTACCTACATCATTTCCTTCAACTTTA…	yes	contig28672	OtL010-C05			10.502	-2.65241	-2.0724	1	465	Non-Horn
contig28697_a574	CTGGGGAAGGCATCAAAAAAACACGTCCTTTTTGTATCGGGAAAGGCGACACGCATTCCAGACATAAGTGGTGAATGAAGTATGACAGCACCAACTTCATAACGGGCAGCCAAATCGACTGTGGGTACAGTACCTATACTCTGGCCATAAAGTATGATATTTTCGGGGCTAATGCCGTATCTTGTGCGTAAGGCAAGCCACGCGGCATCTATGTCAGCGTAARGATTTTTCTCGGATGGTTTACCCGCACTGACGCCGTAACCAGAATAATCGTAGCTGAATATATTGCAATTGATACGTGAACCGAGCCCGAGGTAGAAGCTGCTCATTTGACCGAGATCGACAGCGTTTCCATGCGAAAATAGTATCGTAAATCTGGCAGTGTTACTACAGCGAACA…	yes	contig28697	OtL010-B08			8.7496	-4.03889	-2.00548	2	721	Non-Horn
contig28718_a575	CTTTGTATATATCATTTATTTATTAAAATATAAAAATCATTTAAAAAAAAACGTTTTTAATTTAATTCCAAACATAACCTCAATCTTTCGCCCCAAACAAACATAACCTCACTGTTAAACGTAAAAAAAAAATKTTAATTCTTATTTACTTTAAAAATATCAATAATTAGGTTATTTTTTGGTTTAAATGTCCGTTTGTTTGGGAATTTTGTACGTTTGATTCATTATTAGCACCGTTAGCGTTGGGAGTTTGTAATAATCGGCTTCTACGCCGCGTGTAATGCTGCCAAAGTAAGATTTGTTGGTCGTCGATGAATTTGGTGCATTGCGAGTTAACTAATTCTCTTCGGAAGTGCTCGTATTGTAATAAATCCAAAAAATATAAACACATTGGATACT…	yes	contig28718	OtL002-B02			8.86939	-2.01368	-2.66275	3	678	Non-Horn
contig28770_a576	GATTGCGTTTGAATCATCGACAAGGAAACATCTAAAATGTTTCGCTTAACATTTCTCCTTTGTTCTCTTTTAATCGCTGCTAATTGCGCACTTTTAAGGGTGCCTCTTATCAAAACGAAATCAGCAAGAAGAACACTTCAAGAAGTTGGAACTGAAGTAAAACAAGTTCAATTAAGATATGGGGGGCCCACACCGGAACCTTTATCTAATTATCTCGATGCTCAATATTATGGTCCAATAACGATTGGTACACCACCTCAAAGCTTTAAAGTTGTCTTTGATACTGGTTCATCTAATTTATGGGTACCCTCAAAACAGTGTCATTTCACTAATATAGCTTGTTTGTTGCATAACAAGTATGACTCGAAGAAATCTAATTCTTATAAAAAAAATGGGACA…	yes	contig28770	contig_176			11.0229	-2.22646	-3.05909	4	937	Non-Horn
contig28780_a577	GGGGGCACAAGCGTGTGACACCCCGCCACACTTCCTAACCCAAAAACCGTGGCAAACAGTGGCAACRGRAGGTAGTGTTACACGAAACCGTAGCCTGTGTGACGCTCGACTGGTGAACGCCACGTCGGGTCTAGTACGTCTTTTTAATTTCTTCAGTCTCTCGACGCACGCTAAGTACATCTCTTAGTTGCCAAGCCCGCTCAAAATAATCAAAAATGGTGAAACCAGTCAGAAARAACTCAAGTAAAAACCCTCCGATCTTCAGTCATGAATTTATCATTCAAAATCATGCGGATATCGTATCATGTGTGGCGATGGTGATTGTTATTGGCCTTATGGTTCAGGTAACAGCTCCAATAGCCTCTTTATTTATTGCTCTTCAACACAATGTTACCGAAG…	yes	contig28780	OtP002-A07			10.4813	-3.05594	-2.15302	4	627	Non-Horn
contig28789_a578	GGAATTCTGTTACGTCAATAAAACGTTTAAACGTATGTTATCGTTAAGTAATAACGTGCCATTACTTGATACACTCCCGCGGATATAAAAACCGGATTAAACGGAAATTATKGGTTTAGTACAACGTCGAATTAATAACGTAACTGGTTTGATTAAATTATTCGTTGAATGATTTTCTTGTAAAAATGAATAAATTGTTGGTAATTGGTATCAGCGGWGTAACATGTGGAGGAAAAACGACTTTGGCAAACGAATTAAATAAGATTTTTCCGAATAGTAAAGTAATAAGTCAAGATGATTATTTTTTGCCCATTGATGAYGAACGTCACGTGATTATMCCRCATTTAAACCATATCAATTTCGATGTCTCTTCCAGTTTGGATATGAAAAAAATGGTTG…	yes	contig28789	OtL002-E02			8.0328	-2.34855	-1.62706	3	850	Non-Horn
contig28810_b893	CGGCCGCGGGACCGCACCATCAAACACCAAGGTTAACATCACAGCGTGCAATTCTGTGCAGTTTTCATTCATTGTCAGTTAAAAACGAATCATTTTAAAATGGATATTCAAAAAGTTTTAGTCGCGGATGCTGTTGATAAAGCATGTGTAGATTTGTTAAAAGCTAATTCAATTCAAGTTGATTGCAAATATAAATTATCGAAAGAAGAATTAATTAAAGAAATTCAAAATTACGATGGGTTAATCGTAAGATCTGATACGAAAGTTACTCAAGAAGTTATAAATGCGGGAAATAGGTTAAAGGTTGTAGGAAGAGCCGGTGCAGGAGTCGATAATATTGATATTCCGGCAGCTACAGCGAAAAATATCATCGTTTTAAATACACCAGGYGGAAATGCA…	yes	contig28810	OtL013-H02	OtL019-D11		12.273	-1.68328	-1.91327	2	1148	Non-Horn
contig28857_a580	GGCTCTTATCCTGGAATATTGTGGCGAACACGTTTTAACARAGAGACGCCGCAATGCAAATTTTCGTGAAAACCCTAACCGGTAAAACCATYACCCTCGAGGTTGAACCCTCCGATACCATCGAAAATGTCAAGGCAAAAATCCAAGACAAGGAGGGTATCCCACCAGATCAACAACGTTTAATCTTCGCTGGTAAACAACTGGAAGATGGACGCACTCTTTCCGACTACAACATTCAAAAGGAATCGACGCTTCACTTGGTGTTGCGTCTTCGTGGTGGCATCATCGAACCCTCCCTTCGTATTTTAGCTCAAAAATACAATTGTGACAAGATGATCTGTCGTAAATGTTACGCTAGACTCCATCCTCGCGCTACTAATTGCCGTAAAAGCAAATGTG…	yes	contig28857	OtP018-C05			12.9617	-1.45153	-2.78471	3	578	Non-Horn
contig28876_a581	GGGAAGTGTASAAAGTAAAATTGGCAACGTCGCGTTCAATCGTTGAAGACAGAGGGGGGTTTATAAAATCATGCAAATATCGCTGTAAAGAATTCCTGCGAAGCCGGTGGACGAATCATCCATTTTAAACCACCAAAATTCTATTCRAAAATGGATATTTGGATTACCCGCTTTTAATGATATCTCACGTGTGACTTTGTAAACTGTTTATAACATAACCTAAAAGTTCAAAAATGACCGAAAAGTTTCCAACCGATTGGGATATCGACCAATATTACGACGAAATGGAACCAGAAGAACATTGGGAATTGCGCAAAGCGTTCATGGAAGTCCATAAGGATAAATTTCCTGAAGATTATTTRGTGGCTTTAGCGACGACGTTTACYAATATTGAATTAT…	yes	contig28876	contig_237			11.531	-1.49926	-1.83855	3	687	Non-Horn
contig28906_a582	GTTGTCAATGTCATCATAAACKGTCACTCATCTTTACATAAAATTTCACGTTTTTAAACTGTAAAAYCATGTCCGGATACACAAACGATGCATTTTGGGCCCCAAACAACAGAGATATTACGAATTTTTACGATACAAACGATGAGTATGAAAATATGCAATCTCAACAATTAGATTTTCAAACGTTTAATAATCAGGCTGGGAATACCTATTACGCGCCKCAAAACCMATTTGGAAMTGGATTTCCCTGATATGTTGGTTCCTGATTATTCTAAAATACCAACAGTTCAAAATGATGGTTTTGATGAGCCCCCTTTATTGGAAGAGTTGGAAATCTACCCAGATAGGATCATGGAAAAAACCATAGCAGTTTTAAACCCGTTTCGAAGTCATAGTTTA…	yes	contig28906	OtL009-G10			8.8225	-1.03093	-2.4918	3	904	Non-Horn
contig28907_b894	CTTTGCGGTGGTGTTAACGCTCCTGGATTTACCGCTTCCAATACATTTTCGAACTCTTGTAGTAAGTCTTCCGTTGCGTATTTTTGTTCTATGGTTGTAAAACCGATCTGATCTTCCAACCATGGGAAGCTAGACTCATAACACGCAGCAGCCATATCTTCACTTTACAAATCGAAGGTCGTCTTTCCCTTTCGTTTTCTTATTAATTTCGATTCAACAAAACCCAAGAGTCTCAAAAAATAAGGTCTTTACCTAYTATGATTGTTATTAATAATCTCTATCTAGTGTTGGTACAAAAAAAGAAAAAGATAACTTCCTRTTCTACGCAGTCTTATTTCTTAAATAAAAAAAACGTCTAGTATTCTTTTATAATTATTGCTTGTGGTCGACGRCGAAAAA…	yes	contig28907	contig_292			12.5153	-1.71241	-2.06932	1	734	Non-Horn
contig29117_a583	CACGTCGRAAATTGTCCAGATAAAGATCACGTGTTCCAGAAACTTCTATAAATCCATTATAAGAGGGCCGTTTTTTAGATATCTTGCGTAATTCTAGTCCTGTCATTTAACGACTTAAAAGCCAGTTTTTTCGCGTTTAACCGTTTTTAAAGTGTTTAATAATAATGCCGAGACGCGGACGATCAAGTAGCCCAACTCCAAGGGCTGCACCTACTCGATATTCACCACCCCCGAGTACTACATTACCTGCTAGAGCTGCCCCGCCTCCTCCAGCTCCGATGCAAGCTCCCGCAGCTGCAGCTCCTCAACAACCAGGTCTTTTCGGTCAAATGGCTGCAACGGCTGGTGGTGTAGCAATTGGATCTGCTGTTGGACATACAATCGGACATGCATTAACTG…	yes	contig29117	contig_209			10.5779	-1.98286	-3.24535	0	750	Non-Horn
contig29137_a584	GTTGCGGTAACGACGATAATCGCAGCTGCTAAACATTTAGTTGATGCTTCAACGGCGGCGATGGCGATTGAATGGGCGGGATCGATTGGGGGATCAATTTTAGAATTTAAATCGCTGAATAATCTCCAATGCCAAACGGCAGCTTCAGCTTCTTTACAAATTTTAGCCATGGTTCTAACACACTGCAAAGGATAACTTCCTTTGGCAGTTTCACCAGAAAGCATAACACAATCGGCTCCATCCAAAACAGCGTTAGCTACATCAGAACTTTCAGCTCGAGTCGGTCTTGAATTTTTAACCATCGACTCCAACATTTGCGTGGCGCAAATTCCGGGTTTTCCGCGTTTATTACATCGGGCTAAAATCGATTTTTGAGCCAAAAACACTTTCTCWGTTGGG…	yes	contig29137	OtL020-C12			11.3874	-1.79076	-1.98764	3	827	Non-Horn
contig29148_a585	GATGATAACTCCTATACGAAAAATATCTCCTATATTAAAAATTATTAATAATTCTTTAATTGATTTACCTTCTCCTTCTAACATTTCAGCTTGATGAAATTTTGGATCTTTATTAGGATTATGTTTAGGAATCCAAATTATTACCGGAATTTTTTTAGCTATACACTACACATCTAATGTAGATTTAGCATTCAATAGAGTAATTCATATTTGTCGAGATGTAAATTATGGGTGATTAATTCGAACTTTACATGCTAACGGGGCAAGATTCTTTTTTATTTGTTTATATATACACGTAGGACGAGGTATATACTATGGTTCATACAACTTACATATAACTTGAACAATTGGGGTATTAATTTTATTTCTTGTAATAGCAACAGCCTTTTTAGGATATGT…	yes	contig29148	contig_128			12.7217	-2.31128	-2.23251	1	1054	Non-Horn
contig29150_a586	CGTGATAGTCTCTCTTAATTCTGCAATCTCTTTATCTTTGCTAGCAGATTCGTTACTTTTGTTTTGAGCCTGTTCCCCTTTTCGCTCTAACAATGTTCTAGCAGCAGTTGAAGCACTTTGCGCCTGTCGCATAGCGGCTTCAGACTGTGCCAAAAGTCCCGCTTGAGAGGAAATCAAAGTAACCAATCTTCTAATCACCAAAGATAGGAATAAAGCAAAACCGGAAATGTAAAAGTTTCTTTGCGCGCGGAATAAGCGCATATTCTCTTGCATCTCAGCTTCTAATTGTTTATGTTCATGTTCACTCCCATGAGAATACTTTCTCATCTCCCTAATAGCGTCCAAAAGGAACAAGAATAGAATCGCTAGCAAAATCATAAAATAAATGCTCGCTTGTCG…	yes	contig29150	OtL003-H05			10.2533	-2.53494	-2.74507	2	713	Non-Horn
contig29164_a587	TAATTGAATAATCACGATAATTGGATTTGTTTCTTAACCAGTTCCTGCGGCTAACATCCGTTTATTGAAATACGACAGTTGACSGTAGCCAACTTCGCCTCAATTATATGCACCGGTGCAACTTTTGCTTCCAGTGTAAACTTGTGCTTTTAGGAAACGGTTTAAAGACGTTAAGAAAATGACAGACACAGCAGTTATCCCACCGCCAGTTATGTGGGCCCAAAGAAAAGAAGTCGTCTTTTTAACAATTAACTTAGAAGATGTTAAAGATCCTGATATTAAAATTGAAAAAGATTCAGTATATTTTAAAGGTGTAGGAGGTGTAGAAAAACGTGCCTACGAAGTAAAAATTCTATTATACAAAGAAATAGACCCAAAAAGATCAAGAAGTTTCAATAG…	yes	contig29164	contig_244			10.7203	-2.31329	-2.20323	2	1020	Non-Horn
contig29223_a588	TACAAAGCAACCGATTACCACGAAGATAAAATCACGATAACCGAAGTGTGTCCAACGAAAACGTCCGTTTTAGCACTTGGCGTAACATGCGCGCTTCTTGTTATCTTATACATAAGTACCATTTTCTGTTATTACATGAAAAAGTGGTTAAATCCATCCAAACACTTGCCGTAAAGTGAGCGAATTATATTAACCGAGAAGATTCTCGATCTTGTACAAAAAAAAAGAAAAATGAAACCTTTCTGTGAGATTGGTTAATTTAAAACTCGAAACCAACCTCAACAGAGACGTCCAAGAATTGCAATATTAGCGTTACTAATCGCGAGAAAWCATAATTAATTAGTTTCTAATTGCTCGGGAATGGTGGAAGACTGGTGTTGGGTTTCTTCTTCTTTTCCT…	yes	contig29223	OtL020-C06			10.5511	-0.582053	-1.10462	4	784	Non-Horn
contig29234_a589	GATTTACAATTTCAACACACACGCTATCTGTCACTTTGGGCCAATTTAAACGTTTTTTTGGATGAAACTGAACCATTTATTAAGTGAATCGGTTATTAATTCGATCAAAAAGTTCGAATAAATCGCTTTGTGCGTTATCGGGTCAAAATTTTCGCAATCCTTGCGGGAATTAGTGCGCGACCGCACCCACTTGGTTCAATTAAACGAAATCCGTCTACGGAAGAAGCCAACATAGGCCTCTCAGATACCGCGTTGATGGACATGGTTGTGTCAAATTTACAACAACAACGTGCTGTGACGGAGCAGTTGCGCCGCGAGGCCGGTATAAAAAGAATTCCGGTGTCGCAAGCTGTCGAAGAGATCATCAAATACATCTCGGAACATGAACAGGAAGATTGT…	yes	contig29234	OtL001-G03			10.9228	-1.88969	-2.4142	1	1194	Non-Horn
contig29291_a590	GAGATCGCTGCCATGGATGACTGCGAATCCCCGCTTGAAGTCCTCTCCAGAGCTGCCACTATGGTCCAGGAGAATCAACAACAATCCATTATTTCTGATGACTCTTCAAAACAAAATGGCAATAAGCAATTACCCACCACAAAATGGAAAAGAGATCGACGAAGTAGAAACGAATACTCAAGAAAATCTGATCCAAAACTTCCGGARAATTTCGGACARGAACCCGAGGTTACCTCCAACTCGCCAATTAATCCACAGCAAAATGGGCAACCAATTAAACCATCTGCGGACACACCCCTAGATATGACCGTAAGGCAAAGAGGTCAACCGCCTTCCTACAGCCAAACGATCAACAATCCCGGCTACAGATCAAGCTATAGACCATCTGTTGTAACGAAC…	yes	contig29291	OtP010-G08			10.7696	-1.93747	-2.26801	3	772	Non-Horn
contig29299_b895	TTTTTKTGGTTTAATGATTTTTATTGAAAAAAATGAGTTTTACACGATTTCAGATAGATCCTTACTAGAATAGATACACATAATGGGAGTAACAAAAGACATTTCGTCGATTTTGTTCCAACTATTTCTTACAACTAAACATATAAATTTTATTTTAGAGTCCCTTGAATTAAAATAATTACGAGAGACCAACGGGGCGCGTTTTACACTTAATAAGATTCTTAAACGGTAAAAGAAACTAATAACGCAATGGCAACGGAAGAATTAGTGCCCGAAAGTGATGATTACGAACAAAAAGAAAATAAATTATCATTCCAATTTGAGAACACGAAAAGATTGATATAAATAGTAAAGTAATACAAAGAAAATTAATGAGGGACGATTCGCCTATCGTTGGCT…	yes	contig29299	contig_402	OtP012-E11		11.8281	-1.54387	-1.79271	4	816	Non-Horn
contig29309_a591	CTTTTTATGATCATTTTATTCGTCATYGCATATTTACAAAATTAAAGAAATCACAACTTTTTTTTTAATAAATTTCTCCTTTATAAGATCCATCGTCGTATAATTTTTCGTTAATATCCGGAATCCATCGACCTTCCAAACCRGATCCGGGTGCTAAAATTGGATACCCGGAAGCGGTTACTGGTGAAGCAACGAGAGTTTTTGCAACACCATAGGGAGTTGAAGCGTAAGCAACAGATGGTACAACAGGGGCAGCGGCGTAACCGTATGATGATACAACTGGAGCAGGGGCGTAAGCAACTCCATGAGATACAACTGGAGATGCAACAAATGGAGCAGAATATCCAACAGCGGCAGCACCAACATTCTCATGAGCTACGAYTCTTCCGGCTGGTTGAG…	yes	contig29309	OtP006-F02			12.2739	-0.945589	-0.979818	4	583	Non-Horn
contig29339_b896	GATCCCTAAAACTCCGGTTTTGACAGSATTACAAACAATTTTGCACAATAATCGCCRAACCTTCAAACATTTCTCTCAAACAAAGTGGAATAAGATTCTAAGTGAAAATGTTCAGAAATCAATACGACAGTGATGTCACCGTGTGGAGCCCYCAGGGTCGTCTTCACCAAGTGGAATACGCCATGGAAGCCGTAAAACTCGGTTCAGCAACGGTAGGGTTAAAAAACGCCACTCATGCCGTCGTTATTGCATTGAAAAGAGCCTCTTCGGAGCTAGCGGCGTACCAGAAGAAAATTATACCCATCGACACTCACATTGGTGTGGCTATTTCCGGTTTAACCGCAGACGCAAGAATTTTAAGTCGTTACATGCGTACAGAATGTTTAAACCATAAATTTT…	yes	contig29339	OtL001-H10	OtL014-E12		11.6224	-1.96932	-2.15498	3	965	Non-Horn
contig29344_a592	GAACGGGAGCTCGATATTCTTGAGTAATGGAAGGTCTGATGGGTTGGGGTCTCCTTATTGGGATATTTTCTTCTTCGTCCCTTGATTCCTGTCTAATTTGTTGTCTAACGTTTACTATACTTTCTCTGAAAAGTGGCGCTTGCCTCGTTGGTGTCGCCGGTCTTTGTTGAGCGAYTTGAACCGGGCGTTGTTGAGGAAGAGGAGCAGGGCGMGATGGAGCTCGGATATCTTCACGCGAAACSGGAACCGGTCTTTCCGGTCTAAAAGCAACAGCCCTTTGCGGTTCCTCCTCTTCTTCTTCTTCCGCTGAACTCACYGCTTGACCAATTCCTGATTGCAAAGAACTTAACCCTAATTTRGCTACTTCAGCTTCAAMCGTTGAGCTGAAAGGTTGTGGGA…	yes	contig29344	contig_184			10.9242	-1.3621	-1.56348	3	714	Non-Horn
contig29349_a593	GGATGTGACATAACCTCAAATTARKAAGTCAATAAGTGACAAATCAATTTAAGGTGTGAAAAATGTCCCATTTAAATGATATCGCTTGGCAAGAAGCCAAAGACTTATTTAAAACCTGGCGAGATAATAACGAACGTAAAAGCGAAGATGTTGTGTACATTTGGAAAGCTGTGCTTGAATATAACTTGAATAAGCTTGGAAAAGAAAAGCAACAAATTATTGAACAAACTTGTATTGGAGCTTTGGATTGTTTTCGATTAGATGTTGCTGATACTTGCGTTCGGCTTTTAAATAAGGAATTTCCTTACAGTTTAAGGGTCCAAAAATATAAAGCAATGATTTACGAAGCTCAGGAGAAGTATGGGGAGGCTATTGAAGTTTTAGAAGATATCATTAAAG…	yes	contig29349	OtL005-E02			10.4656	-2.07588	-2.36305	2	918	Non-Horn
contig29367_a594	GGATGTCAAATAAASGWCACTTTTCGGTGTGATTTAGAACTGACAGTACAACACTATATTTTTTTAAAATGCACCACAAAATAGCGGCTATACGTTTAGCAATAGTATTAGTATTATGCGTAGCGTTAGCGTATAGCGAATCAAATGATCAAGTGCCGGTACCGAAGTTTTCACAGAATGTCGCCACGTTGAAGGTGTTATATTGTTATTCTTGTGGATATCGCAAAGCTTTTGATGAATATGCCTCAATAATCCAACAAAAATACCCGGATATAATAATCGAYGGAAGAAACTATGATCCACCTGGATTAAACATGTTTTTAGCAAGATTATTGGGTGTCTTAAAGTTAATGGTAATCGTTTGTATTCTTGGTGGTGTAAACATTTTTAATTACATCA…	yes	contig29367	contig_88			10.0421	-3.628	-3.61358	3	883	Non-Horn
contig29439_a595	GGTAAAGCAAAACAGAAAAATGCACAACAACGGGACAATAAACAGCAGCAGCTACAACAACCACCAATACAACAACGGGAATCGGTTAATAAGCCGTCGATWMRAGWKCMTGWCCCGMARACGYMACCGTCGAAGCCGACTAATAAAACAWATAAAATGAAGGAGCTTAACATGAAAGGTGCTAATAAGGAGGGTACAGATATGGACGCGTTTAGCGATAATCATGCGAACAATCCTGAATCTCCCGTAAACGTCGTCGGCAGGGGTGGATTCCCATCGGTAGTTAATGCTGCCCCTGCGGTACCTACCACAGTCGTTTCCACGATCGTCCATCATGCGRCGAAGGAAACTA	yes	contig29439	OtL009-H06			12.8001	-1.86306	-2.00119	3	352	Non-Horn
contig29441_a596	GATAAAAATGAAACTGAACATAAAAACGGTGATGTGGACAATAATACGAATAACAATACATTTTCCATAAAATTAATTGGTTATAAACATATAAATTTCTATGATTACGATAAAATCAATTCTTCTTCAAAGTTTGGTGAATTCAAGTGACGTTCATTTTAGTGGGGTGGATTTATGTTGAAATGATAAAAATGCCCCGTAAYAACATCGAAAAATGCACACTTTTTATGATAATAGCATTAAATTTAATTGGGTTAAACGATTGCTTACCAGATGAGGGAAAATGGGATTGTAACCTAACAAAAGATCACACCGATTTACTAATCTCCAAAAGCTTATTTAATGGGACACAAATATTCATAAAACTAAATTGTGAGACGACAACGCAACATCCCACCA…	yes	contig29441	OtP010-H05			10.0903	-2.22926	-2.43612	3	796	Non-Horn
contig29466_a597	GGAATCCATCTGTKAGAGCGCGCATCTGTCGCTCTTCCTTTTCGTTTCCCGTCATCAAACATGGGTATCGACATTAACCATAAACATGACCGCAAGGTTAGGCGCACAGAACCTAAAAGCCAAGATGTTTATTTGCGCCTTTTAGTGAAGCTGTATAGATATTTGGCTCGTCGTACAAACTCAAAGTTTAACAGGATCATTTTGAAGCGTTTGTTTATGAGTAAAATCAACAAACCACCAATTTCCTTAGCTAGAATTGTACGTTTTATGAAAAAACCAGGCCGAGAAGGTATGACTGCAGTTGTTGTAGGCACAGTAACCGATGATGCCAGAATTTGGGATGTACCTAATTTGACAGTGTGTGCTCTTCGTGTAACGGAAAAAGCACGTGCTAGAATT…	yes	contig29466	contig_362			12.4845	-1.98967	-2.15574	3	443	Non-Horn
contig29473_a598	AAACAACGTTTCCATTACGGAGTTTTCTGAAGCATTTTTAATGAAATCGCGTAGGTTTTAAAAGGCTCACAATCCAAACATATCGAGTATTATCTGTATAAACCGTGCTGTCCACAATGGATAATATCCCGAGGACTCACGARGACATTGAAGCGCAAATTCGCGAAATCCAGTCGAAAAAGAAAGAAATTCCGCCGGAAGTAGCAAATGATAAAGGCGTTGGTTTAGGAGAGAGCGGATATTTTGATAGCGAAATATACGATGATGGCATGGGCAAGGGGAARTACGAGGGATATGTAACCTCCATTGCTCCTAATGATGAAGTTGATGATGAGGAAGAGGATGATGGGTATAATCAGAAGAGACCTGGGTTGGGGGCTGCAGCTCCCCTTAATGATG…	yes	contig29473	contig_437			8.75355	-2.12457	-1.97485	2	710	Non-Horn
contig29479_b897	GGCTCTTTAGTTGGTCGTACTGCGCCTCGAAAGACCCTTCATCATGGCTTCTTCAGGGAAAAAAGGCAAGAAGAASGGAATTACSCTTGCGCTTAACGATTTCTTACAAGAAACACCCGGCAGTGCTCCTGCTTTACCTATAAKAAAATCTACATTGAATTGGGCTGATGAAGTTGAAGATGCTTACGATAACAACGATCTTAGTAGAGCAAAACCTAATGTTGTCTTACCAACGGCCCCGAAAGCAGCGAGAGGTCTTGAAGACTTCAGCGATAAAGTACCTCAAAATCCTCCCTATGTAGCGTATTTAATGAACCTCCCTTATGATGTTGATGAATTAGAAATAGCGAATTTTTTCGGTAATTTAAAAATTTCTAATATGAGAATCCCAAAAGATGA…	yes	contig29479	contig_331	OtP011-E12		10.1603	-2.03377	-2.94595	2.5	1098	Non-Horn
contig29522_a599	TTYAAGTAAAATAAAATTTATTAGCGAAACTTGTTTGTTTRCAAACTCTACGGGTGGATTTTTATTCATTTCTAAGACTAGAACCCCTCTTTATAACCAACTTTATTGTTCTCCTTTATAAGTTCCATCATCAGCTTCCTCTAAAGGAGATGGTTTGTAAGAACCATCATCGTATAATTTTTCGGTGTTATCTGGAATATATTGGCCTTCTTCTAAAGATTTCGCAACAGGGACAACTAAAGCTGCTGGCTGAACGATTGTTTGTGGTACCGCCGGAACGGGAATTGCAGCAACAATTGGTGTTCCTTTTGTTAAAGTAAGAATTGGTTCAAAAACTGCAACTCCACCTTCAGGGACAATTGTGCCTCCAGCAGCATCGGAATTAACTTGACTTCCATC…	yes	contig29522	contig_265			13.8299	-1.7764	-1.21027	3	607	Non-Horn
contig29541_a600	CATTCAAAATCTGAAAATAGTTTAAATTGTGGAGCAACTGCGCCAAAACGTCTGCGACAAAAAAAACAAATTACAATCGTTCAGACTTSAGACAACATGGCATCCCGTTCCGCGGTGAGCTCAGCTGACAACTATTGTCAGTTTTGACAGATTTGACGCAGTTAGTGCGTGTACATCTACCCGTACGATAAACTATGTGATTTATCGCCATCAAACGTATCAACAAAGAAACGTTATCTCAAACGAAACAACGAGCCCTGTAAGATGACTTCCCGTGTTAACGTTAAATAAGTTTTTGTGTGTCGTGGGTTTTTGGGAGGAAATTAGGTTGTAGATTTTTGGCGCATATACAATGGATTTTGACGACTCGGGGAACGGGTCCGGCCACGAAACCGTCTA…	yes	contig29541	OtP016-C11			8.59288	-2.10755	-1.07765	3	1418	Non-Horn
contig29556_a601	TTAAAAAATCTTATATTTATTTACATTAAGTAAAATGAAAGCACAGCATGATAAAAAAGAAATTGGTAAAATTTCCAAACGGATCCCTTTGTTTATTCGCTTTTCTCCATAGCCTTTTTAAAGACGGCGTTTCTAAAGAGCATGCTTAAATAAGGATCCCCTAAAGAAGTGGCATGACTGCTAGCAACGCCCCCTCGTCCGGTGCTGAAACTGTTCGCGATGGCTGTTGAAGATCCTGGGGTATATTCGCTGGCGTCCCTTCCAAGTCCTTTACTAGATCCACCTTGTATCATGATTGGGAAGAAAGAACTGTAAACGCCGCCGGATTTCGAGTTGGGTTGGTTCTTGAAAGGCCATGAAGGTTCTTCGTCTTCTTCTTTTGGGGAGTCGTTCTTTTTT…	yes	contig29556	contig_18			9.36351	0.270794	0.0757778	4	702	Horn
contig29593_a603	GGCTGATGTGTTTATGTAAAGAATCAAAATCATTGTAATGAAAAACGATCTTTTCTTTAATTTTTTGAGGTAAAAACGGCATCGTTACTTTTAAAATAGCGCTCATTAACGAAGTTGTTCGAACAACGTGGAATTCAATATCTTTAACAATAATGTTATCCAATCTTTTAGCAAACTTTTTTACATTTCCTGGTGTCAACCAACTCAATAATCTCCAAGAGGTTCCGTGTACATCCATTATCATCGAAACACCATTCGCCAAAACAGCTGTGTCATCAACAAGATATTCTAATAAAGTATTTTCAAATTTCACTAATTCGGTTAAAGTTAATTTTGATGGATTAATTGTATCAGCTTTACATAAAAGCAAACGTTTTCCTTTTCTATCGGTAAATGGTA…	yes	contig29593	OtL001-G06			8.84293	-1.04627	-2.84972	3	723	Non-Horn
contig29609_a604	GACTCACTAGATGGCGTRACCGTCTGCTGTCTACTTTTGACGTTTATACCAATTTTAAGAAATTTTAATAAAAAATAGTATTTAAAATATGGGTATTACCGAACAAACCTATTTACCCACGGAAGAAGAACTAACAGTTCAAGAAGTAAACGTGTCTGGTCCAGTTTTAAARGCTGGAGCTCACCACTTAGGAAACGACTGTCTCCACGAAAATAATGAATTTATGTTATGTCGTAATGAAACGAATGATCCYCGTAAGTGTATTGCTGAAGGAAAAGCCGTAACCAACTGTGCTCTAAATTTCTTCCGAAAAGTTAAGAGTTCTTGTGCTGATGAGTTTATGCAATATGTTAATTGTATAGACAAATCAAGTTCATACCAGTTATTTGCTCCATGTCG…	yes	contig29609	OtL017-D04			9.51736	-2.0936	-1.95589	4	717	Non-Horn
contig29618_a605	AATTTAGACACCCTTTTTATTATTAATTCATACAAAAATACAAAAAAGAATTATAATTTATTATAAAACAATAAATCTTCTTTTTCCCTCTTCATCGCCTTACCACGGATGTACACCAGCAGCAACGAAAGGAGCATGACTAATTAAAGGTGCTGCAGCATAAGTAGCAACAACAGGAGCGGCATGAACAACTGGAGCAGCAATAGCAGCACTATGAACTACAGAACTACTTTGATGGCTGATTGAAGTAGGAATGCTTCCTACGACCGTAGAATAAGCCAGAGGTGCATGTAAAAGACTTGGAGCTGCGGAGACGGCAACGAAGAAAAGGGCCAACACCACCAATTTGTACATCTTGAGGTCTGTGTTGTTGTTGTTCTTGTACTGGATGTGTCCGTT…	yes	contig29618	OtP008-C10			12.1513	-0.569053	-0.900531	3	408	Non-Horn
contig29653_a606	GAAACTAACAATTRACCTCGAATAGTGACATARAACTGTCAAAACTATAAGCTGAATYATTTATTATGTTTTTGAAACATTTTACGACGATTTTAAGGGATATATAGCGTTTATCAGGATGGGGTTAAACAATGTACTCCTTTTAARCCAACTAACAGGCTATATTATAGCTTTAATAGTATCGTTATGCATTGTTATTCCTATGAGTTTGCATCAAGACCAATTTAGAGGTCATTGCTTGCTTTTTTCCACTGGTTGTTGGCAAGAAACAGATGGTCAATTAAGTGTAGATTGGGCTTCGCAAGGATATTGTAACTATACAATATTTGTTGGTGTTATGTTATTTTTGATATCAGCAACACAAATTTATAGAATGGCTTGGTTTTTAATAAAAGGCAC…	yes	contig29653	contig_199			9.08075	-2.02197	-1.86207	3	1078	Non-Horn
contig29694_a607	GGGGACKGCGTTTAAGCATGGCGTATAGGTTATGTTACTGTTTACTTTAATTTACAATTTCATTAATTTTTATTTAYACTTAACATATAACTAAAAAGCTATGTCAAGGTTTCCACGTGGTATACTTGTAGTTTTCGAGGGCTTAGACCGCTCCGGAAAATCTAGTCAATCAAAAAAATTGGTGGAAAATTTAAGAAATGCGGGACAYAAAGCGGAGTTAGTTACATTTCCAGAYAGATCAACCCCAATTGGATCTGTTATAAAGCAGTATTTGAGCAATAAAGCRTTTGATTTAGATGATAGGGTGTTACATTTATTGTTTACAGCRAATCGTTTCGAAAAAATCAAAGAAATCACAGAGATGCTTAACAACAAGATTAATGTGATTGTTGATCGATA…	yes	contig29694	contig_77			8.44435	-2.67239	-2.0324	3	1266	Non-Horn
contig29704_a608	TTTCTAAACCGGTGCAGGATGACTGCACAGTTTGGACAAACTCAAATCAAACTGGAGGGCACCGACTCCTCGGAGAACGTCACCGAGATACAATCATATCTCGAGGGATTTCAAAAAGAAATTGAAAGCACCGATAATAATGCCACACCACAAGTTACAGAAATCGAAGATGATAATGAAGGTGATGGTGATGAAGGAACATATTTTGTGGACCAAGCAGGTCATTATTATTATCAAGCAAAAGGAGAAACTCAACCAGTTATGACCATGGTATCAGGAATTAATGATTCAGAAGGTGGGGAGGCCGACGAATTCATTATAAATCATGAAAATGAGGAGGAAGGAGAAGAAGAAGGTGAAGAGGGTTTGCCTGGAGATGAAGGGGACAACAACCAAATC…	yes	contig29704	OtP009-E12			9.61748	-1.51365	-1.93686	1	1084	Non-Horn
contig29706_a609	GGGCGGTTCAGTCGTTGAAATAGGTGAAGCAGTGTGTATGTCCATTTATTTACATCGAGAATTTGCCAGAGATTTATCAATGTAAACTGTTGTCACGGGTCGGCCGGCTCTACAATAACGTTAAGCTCTCGGTAAATTCGTTACGAACAAAACTAACGTTTCAAACGCCGCGTGTTGTTTTTTATTAAACCGATTCCGGGGTGTTTTACACCGAATAAGAGAAGAATATAACGAAAAAGAAAAACGTTGCTGATCGTGATGATTCATACCAAGTGATAAAAAAGTTAGTTGTGTTGTATGACAATATTCTTGGATGCTGTAAGAATATCTTTAGTTTTACATTTCATCTAAAAAGGATCACGAAGAAGCCCTACCTGATGCCGTATATACATAGCGGCT…	yes	contig29706	OtP020-G07			11.0223	-1.66888	-1.77042	4	1066	Non-Horn
contig29729_a610	CATGTTTACCCCCCGTTAAGTTCCAAATAATCCAAGAATCAACGGTTCCAAATAAACAGCGCTGTTCCTGCATGACTTTGGCTACTCTCGGGATGTTATCGTGTAACCATTTCACTTTAACGGCACTAAAATAAGGCGTTAAAGGCAATCCACATAAAGGTTTTAAGTAATTTTTATTTCTACTCTTATTTGGTACTGTATCTAATAATTGATCTACAGTTGTTGCAGTTCTCATATCCAACCAAACAATTGAATTGTGTAAAGGCTCACCCGTTGTCTTATCCCAGAGAATAGTTGATTCTCGTTGATTTGTAACACCCACGGCAATGATATCTTGGGCACATCCGCCCGATTCTTCCAATTTCTCTATCCCTTTTTGAATGCATGTGTACACGGCGT…	yes	contig29729	OtP013-E04			8.11753	-2.10528	-2.39825	0	791	Non-Horn
contig29732_a611	ATATTCAGACGAATTCATCGTAAGGGAAGATTTAATGGGTTTAGCGATTGGAGCGCATGGAGCTAATATTCAACAAGCCAGAAAAGTAGATGGCATCACGAACATTGAACTTGAAGAGAATTCGTGCACCTTTAAAATTTATGGCGAGACTGATGAGGCTGTTAAAAAGGCGCGCTCAATGCTCGAATATAGCGAGGAATCACTCCAGGTGCCTAGAGCTCTTGTAGGAAAGGTCATTGGTAAAAATGGTAGGATTATTCAAGAAATTGTTGACAAAAGTGGCGTTGTGCGAGTTAAAATCGAAGGCGATAATGAACCTCAACCGACAATTCCTAGAGAGGAAGGTCAAGTGCCCTTTGTATTTGTTGGRACTGTTGAGAGTATAGCCAATGCTAAAGT…	yes	contig29732	contig_368			10.7804	-2.47673	-1.7868	3	1233	Non-Horn
contig29865_a612	GGAGATCAAATCTGCTTGTAATTCCTCGATCGATACACTTTATTATTTTCAACGTTTCTATTTAAAATATAACAGAAAATCATGCCGGATCATTTAGGGGACGATATGCGTAAGATAAAAAATGAGGAAAAAGAGGAAGAGAAAAGAAATAAAAGCCCTAGATGAAGGAGATATCGCTTTATTAAAGACCTACGGTCAAGGCCAATACACAAAAAGTATTAAAACCGTAGAAGATGACATYCAAACCGTAATCAAACGCGTCAACGAGTTAACGGGAATTAAAGAGTCCGATACCGGATTAGCACCACCTGCCCTTTGGGATTTAGCCGCWGATAAACAAACTTTGCAAAATGAGCAGCCGCTACAAGTGGCTCGATGTACTAAAATTATTAACGCCGA…	yes	contig29865	contig_342			11.8845	-2.03908	-2.44683	3	784	Non-Horn
contig29909_a613	GGATTGAAGAGTTCACTTTACACGATGAAACTTCTCATTTTTGTATTGGCCCTTATCGGCAACAGTTTAGGAGTACAATTTAAGATAATTAATTATCATGGCGGTCCGATTAACGTTGGAATTCAAGGAAATTCTGGGAAAGCTCATTTGGCGGGTGGAGGATTTACTTTAAATCAGGGTGCATCAAGATTTGTAGATGCACCTAATGATTGGGCCGGACGATTTTGGGCACGAACATGGTGTGTTAATGGCAATCACTGTGAAACCGGTGATTGTGGTAATATAATTGAATGTAACGGAAATGGAGGTGCTCCACCGGCTACTTTAGTTGAAATCAATTTAAGAGCTCATGCTGGGCAAGATTTTTATGACATTTCCCTAGTGGATGGTTTCAACTCA…	yes	contig29909	OtL013-G03			9.82971	-0.889594	-2.01958	3	710	Non-Horn
contig29912_a614	GTKWAAAGACCTTGGATCTTCCTCTTCTGTTTTCCCAACCCCCAAATTTTTCTTTCGGAAAGTCAAAGATCAAAAATTCGGGCGCGGTAAATACCTAACGACAACAGCAAAAGAAAGTGCGAAATGAACGACGGAGAGACWTACGCCAGCGGCGACGTAGCCCGCGGATTAGGAGGATTGTACAAGCCGTTTTCTTCGCCTTACCTAAACTATGATCCCGTTTATATGCCCCAAAGYCAACCGGAATACATTTTCCTTGATGGCAATAGTAAACARCGAGGACGTTTTGAACTTGCTTTTGGACAAATTGGTGCTTCATGTATGATCGGAGCTGGAATTGGAGGGGCTATGGGTTTGTACAACGGTCTTAGAGCAACTACCTTGGAGGGACAAACTGGA…	yes	contig29912	OtL001-B05			10.5988	-0.934366	-1.8731	3	1021	Non-Horn
contig29922_a616	GGTTGTCACCCGGTGACATTTCCGTTCGGTCGTGTCGGCTTTTTTGATGTGCCGCGTCTCGATCCGTCATTATAACCGTAAGTTAACGTTCCAGAAGGCTCAGAATCAAATCGTAAGTTGACGCACGGCTCGGCCCCACAATCAGTAAAGTACCGCGTTATTACGAATCCGCAACGGCCCCCGCGGACACAACCAAAATGCCATCGGCGGCTAACGTCAAAATTGACAAGCAGCAAATCGCCGGCGAGGGTTCTACCAACGCTACGGTCGTGGTGGGCGACCCCTCAGTTACTGGCCCCAATTCAACAAACCCCTTACGACAAGCCATCATCACCATCGAACATAAAATACGAAATTTAGAGAAACGAAAGGCAAAATTAATATCATATAAACAACTAC…	yes	contig29922	OtL006-E02			10.7932	-2.92131	-1.73178	3	1264	Non-Horn
contig29975_a617	TTGGTGGAGGAGGTGCTTCATCTTCTATTTCAGAGCTTGGAGCATGTACAGGACTATGGTAAGATTGGGGCCCTCCTTCCGGTTCTGTTGGCGTTGTTGAGCTGGGACTCGAGCTTGATACTCGACTTAAAGATGAATCCGAATGCGTCGCTGTGTTAGTTTTGGTCATGAATTTAGTCGCTGGCGGTTCTTTTGAACTGCTATCGTACCAATTCAAGACGTCCAAAACAGCTTGGGGGTTCTTTTTTTGTTCTTGTTTACTAATATTGGAAGCTTTTAACCATCTCGACCAAGCTTCCGGCATACCCGTAAATTCCCCAGAAACTGCATCAAATCCAACATGAACGGTGTGCTCAAAATTCGTCGGATATGAAATGTTAGGTTTATCTGAGATGATCG…	yes	contig29975	OtP005-B07			9.28076	-1.90648	-1.83177	2	750	Non-Horn
contig29978_a618	GGATCAATCCCGGTGCTTAACTCGCTTAAAAACGGTGCTAAAATCACTTTGTTACAATTAGTAAAGTGGTTTGTGGTGTTTCAAGTTCTTCTTCATTTTATTATTTAAAATTCAACATGAAAATTATTTTAGCACTTCTCTTCGTTCTTTTGGCATTAGCTAATTGTCAATATTTCGGGTTTCAAGATTTTCCATCGAATGCGTTTTCTGGTGGTTTAGATTCTTCTTACAGAAGTGCCAGGGATCCAAGACAGGATCGGGGGCCTGTTGTTTTTCCACARGCACCGTCGGATAATGGAGAGACGAGTGGTGTGGTTGTTGGAGCTAGTGGATATGGTTTTGTGCCACCCAGTTCGAATTATAGATCATTTTATTAAACTGAACTGAATGAAGAAATCG…	yes	contig29978	OtL014-E07			10.8216	-1.6275	-1.59056	4	500	Non-Horn
contig30024_a619	TAAGCGGTTAACGATGAACCCGGGGGTATCTTTGCATGTGACGCAAGTTTTTCCGATGGCTTCTCCCCATTCCATGAAGCTTTTATAAGTTTCATCGCTCGTTTCCGGGATTCTAATCACCTCCAAAAGACGCATCATCGGAACGGGGTTGAAGAAATGCAATCCTCCGAATCGGTCCTTTCGGTTAGTAACAGAAGCGATTTCACCGATTGATAACGAAGAAGTGTTTGAAGCAAATAAAGTTTTTGCTGGAGCGGTTTCATCCAAAGTTTTAAACAGTTTATGTTTGATATCGATGTTTTCAATGATTGCTTCAACGATTAAATCAGCATCAGTTACAGCCGATTTAACATCGGTGGTGCCTTTAATACGACTTTTGGTGTCATTTACGAATTTTTC…	yes	contig30024	contig_386			10.4985	-2.60106	-1.636	3	711	Non-Horn
contig30130_a620	AGTGGTTTGATGCCGCTTTAATTTGCAGTGAGTGTAAAAWGCCCAAGTACAATCGGGGTAATCACATTGATAGGGTTTGTATCCAATGTGGACGAGAGCGTGGAGTTTAGCAGTCCCGATTCTTGAAAACGCTTGGTTACAAATATTTTGGGGACACAAAAAGATTCGGATTCCCATTTCGGTGAGTAAACAAGGTATAAATAAATTAGGGATTTCGTTTATCGATATTTTTGTTACTTCAATAACACTTTGGCGCTCCTTTTCTTTTAAAATAGGGCCACTCATCTCTGATARAGACGCCAAATACTCGTGCATCACTTCTTTGTTGTTTTTATCAAAAAATTTTACAGAAACTTTTGTTCCATTGAAAGAAAAATACACTTCTAAGCCTTTTTTGAC…	yes	contig30130	OtP011-H08			11.5148	-2.04703	-1.68152	0	730	Non-Horn
contig30186_a621	GAGTTGAAAACCGTTGGGCGTTTTGAGAACTAAAAAATCTCAACAATGATAAGATCCGGAACGGTAGAGGATCGCGATCGAAGATAAATGGTCCGTTAAAGTGTTACGTTTAAGATAAAAATTTAGTTTTCGTAGAGTTAGTTCGGCAAAGATGAATCGAAATACTTCCGTTTATAACAGATAGTTAGCGCKAGATACAACCGCCATTGTTGTATAGTTGATAGGTAAAGAACGGGTAGGTTTTAAAGTGAAAAAAAGTTGTGTGCGTTGGGTTTTTGTTAARTTTTGGTGAATAAAGTTTTATACAAATCGATCTTGGTAAGCGTTTTGAAAATGGAGTACGTCRAAAGTAGGTAATGGGCCCCCCARGATCAATGTGGACCCACAGGATTGATGTTC…	yes	contig30186	OtP011-H03			9.76694	-2.02886	-1.36809	3	960	Non-Horn
contig30193_a622	CAAGSGCAGTCGTCTTCCGGTCATCAGAAGTATCGTTGACATATAGAAGAAAACTYCGTTTGGACAATTCATTCCAAATTATTCGTGCTTTTTAAACCAAACTTCTAAACATGTCCTCTACCGTAAAGATTGGAATAATTGGAGGTACAGGTTTGGATGACCCAGATATTTTAAAAAATCGGAATGAAAAGCAAGTTACAACTCAATTTGGGGATCCATCAGGTGGTAAAATCGTTGAAGGTGAGATTGAGGGTGTGCCATGCGTAATTGTATCACGTCACGGTCCAACCCATGATATTAACCCATCTAATGTTAATTATCGAGGGAATATTTGGGCTTTAAAAGATGCTGGTTGTACTCATATTATTGCAACAACCGCAACAGGATCTTTAAAAGAAG…	yes	contig30193	contig_213			10.6227	-2.43917	-1.6494	4	654	Non-Horn
contig30260_a623	TAACCGTTGGGAGAGGGTCTTTTTCGTACGGACGCCCTGGAATTTCCAAGATGATAATAAACTTCCTTCGGCTGAAGTTTCCGCGTCGCCAAAACTTTCAAATGTAATGTCGTGTATTCTCATTGAGTTTAAAGCTTCACATCCCGATGCTGCTGCTGTACGTATCGTTTCTTTATCTTGATCCATCAATTCCGTTCGATGGAAACCTTTCTTTTCTTTACCCAAACCAACCACGGCTACACTTTGAAAGGTATTGTCAAGACCCCAAAAGACGTATGATTTCCCTTGTTTGATGTTGCCCCCGACGAGTTCTATATGTTTCACGAGTTGTCCGTTTGAAACTTTGTTGTAATATTCAGCGGCGGCTGTTAATTTGAAAGGTTTTCCTTCTTCAGTGTA…	yes	contig30260	OtP010-E01			9.32184	-2.74398	-2.34154	3	769	Non-Horn
contig30265_a624	TATCAGCAAAGTTCCTAAACAAGCTTTAACTGTAGGAGTTGGAACTGTAATGGATGCAAAAGAGGTTATGATATTAATAACAGGGACTCATAAAGCTTTTGCTTTATATAAAGCAATAGAAGAAGGTGTTAACCATATGTGGACTGTCTCAGCATTCCAACAACACCCTCATACTCTAATGTTATGTGATGAAGATGCAACTTTAGAACTTAGAGTAAAAACTGTGAAATATTTCAAGGCTCTAAGTAACGTGCACCACAAGTTAATTGAAGGAGATCAACCTATCGAGCAGTTTTGGAGAATTCATTAAGATTTCTTAAAATCCCTTTTATGAGCTTATTTGCACTACATAATCAATTGGTGGAATAAAAAACTATCCTAAGTACATTAATCATTAAG…	yes	contig30265	OtP003-A09			11.1031	-1.62339	-1.59293	1	455	Non-Horn
contig30289_a625	GACTKSMMGKSGKATTGTTATTTCTTTTTACAAGTGATTCTTTCACAGTCAACATGGGTAAGCCCCGTGGATTACGTACGGCGAGAAAACACGTGAATCATCGTAGGGAGCAACGTTGGGCTGATAAAGACTACAAAAAGGCTCATTTGGGGACCCGTTGGAAGGCYAATCCTTTCGGTGGAGCTTCCCATGCCAAAGGAATCGTCCTCGAGAAAGTTGGTGTTGAAGCTAAACAACCCAATTCGGCTATTCGTAAATGCGTGAGGGTACAATTAATCAAAAATGGAAAGAAAATCACAGCTTTTGTACCCCGTGATGGTTGTTTGAATCACATTGAAGAAAATGATGAAGTTTTAGTTGCAGGTTTTGGTAGRAAAGGTCACGCCGTTGGTGATATTC…	yes	contig30289	OtL007-H03			12.0983	-1.29248	-2.05978	3	519	Non-Horn
contig30340_a626	TTAAAACAAAGATATAATTGTGTGACACATAAAAGAGTACCAATCGTATTTTGAATTATCATAAAATCATTCATTAAAATTATTCCGTAAAGTAACCATAATATTGAAACAAAAAATGCCATGAATGTTATCGGAAATGGAATGCATGAAGCATCTTTTTTACGTATTATGTCTTTAATTTCCATTAGAGGACTTCCCATTAATAACAACATTAATACAGTTACAATCAAACCATATCTAAATTCGATTTTTGTTGCATCCTCCCATTTAATATATAAAAATAAAGCAGAAACTAAAGCAAATCCTCGTGCTGATGGTCTATAAACTTCTTCATAACGATGTTTTGAATAAACCAAATAAAAAATGAGATACATAACATTAAGTATTATCGCTGCCATA…	yes	contig30340	contig_135			8.33692	-1.50521	-1.89007	4	707	Non-Horn
contig30344_a627	TTTTTTAATCCCTTCTTTTCTTCTTATCTCTTTCATCTCGTCGTTCCGGCTCCTTCCGTTTACTCACTTTTTTAGCTTGAGTCAAAAACTGATCCAATCCAAAAGGGTCCTCTTCTTTTTCAAATTGAACCGGTCCAGATCTATTCCCCGCGGATCGATCCGTCCCTGTAAACTCTTTATCSGGAACGAATTTATTCGTTTTAATCAACTTATTTAAATCCTCCCCATAAACTTCTTTATCAATATTTTTCCCTGGCCTATATARATGATTAGCCATCGACCCGCCTTCGCGCCATGGTTTATCATAAACATTATAAGCTTCATCATCACCATAACCATGCCCCAAACCTTGATTTTGTCCAAAAAGTCTTTGATCAAAYTGACCCTCACCACTTCCAA…	yes	contig30344	OtL014-F10			9.0588	-2.25507	-2.0171	2	621	Non-Horn
contig30353_a628	GAGAGTTGASATTGACATTTGACATTTTGTTTTTTATCGYTCCGCTTCGAAATTTTTCATTGATTTTATCTTTCATAACCGAATTAACTAAAATGTTGAGTGTACGTACGACYGCASTAAAATTGGYAAATTTATCTGGTTGGAAAAGAAATTTTTCRAACACTTTATTAAAAGCGGCGACRCTTTCAAAGTGCAGGATGACAAAGATTTTTCCGAAAAGGTCGAGAATAGTAAGGATCCCGTTATTGTTGACTTTTTCGCTACATGGTGTGGTCCTTGCAAAGCACTTGAACCCCGCCTAGAAAATATTGCTGCAAAACGTCAAGGGAAAATACAAATTGCCAAGGTTGATGTGGATGACTTAGGAGAAGTTGCAGCCAAATATGAAGTTGGTACAAT…	yes	contig30353	OtL008-C09			9.99473	-1.9145	-2.065	3	630	Non-Horn
contig30434_a629	GAATTAATAAGTGGACGTAATGGACGGCGGCGTTGGACTGTGAAAATTTTCGAATAAACCGCAAATGATGACAATGTTATCTCCAAAAGCGGCACTCGGTATCGCCGCAGGCGTCTGCGGAACATTAATATTGGGTTATTGCATATATTTTGACCACAAGAGGCATCAAGATCCCAATTTCAAACAGAAATTACGTGAAAGACGTAGAGCTCAAAAGGAAGCTTCAGCAGGTGGACGTAGGACAAAGACAGATTTTCCAAATATGAAAGATCACGAAGCCGTACAAAGATTCTTCCTCCAAGAAGTACAATTAGGTGAAGAGCTCTTGGCAGCTGGAGATTTGGAAAATGGAGTTGATCATTTGGGTAATGCTGTAGCAGTTTGCGGACAGCCCAACGA…	yes	contig30434	contig_60			11.2335	-2.36667	-1.72428	4	1004	Non-Horn
contig30442_a630	GAGTAGTTCTTGTCTAAACGCAATTTAGATGCACAACTTGAGCATTTCTCATCAGATTCGATGGGCCATCAGCCCAACCAGTTTTCCATCCGGCCACACTCAATGTTTTACCAGCAGATTCAACTGTTATAGTTCTTTCCCACATATCAGGTAAAGTAGCTATTCTAACATGTTTATTGGGTTCAAAAACCAACCATTCATATACTTCATCAGAAATACACAATACATTCCATTTTTTTCACAGAAGATCAGCAATTATAGTTAATTCTTCTAAAGAAAATACTTTCCCTAAAGGATTGTGTGGGGTGTTTAATATAATCATTTTGGTTTTTTTATTAAATAAAGATTCTAATTCTTGTGAATCTAAAACCCAATCAGATGAACTAATTGGTCCAGAAG…	yes	contig30442	OtL009-G02			9.87599	-2.48752	-2.66612	1	410	Non-Horn
contig30476_a631	GGAGTAAACAACAGTGACATKGAGTGACATTTCACATTTCACCGGAGTTTTTCACATCAATTTTTATGTTATTCTTTTTGATCTTCCTTCAAATCCCGTTTATAATAATGGCCTGGCGATCTCACGGAAAAAATAATTTAGAACTCGTCCGTAATTTAAGAGCAAACGGAATCATAAAAAGCGAAACCGTTGAAAATGCAATGAAACAAGTCGATAGGGGTAATTATTCCCCAAATAATCCCTATATGGACGCGCCCCAATCAATAAGTTTTGGAGTGACYATTTCYGCACCGCACATGCATGCCCATGCCTTAGAACTCTTAAAAGATAAACTAGTCCCTGGTGAAAACGCTTTGGATGTTGGATCGGGAAGCGGATATTTAACTGCTTGTTTTGCTT…	yes	contig30476	OtL013-H12			9.45862	-2.02556	-2.5701	3	896	Non-Horn
[truncated: 1,191 more rows]
