# Supplementary material for: Insights into the Development and Evolution of Exaggerated Traits Using De Novo Transcriptomes of Two Species of Horned Scarab Beetles
Source: PLoS One. 2014 Feb 20;9(2):e88364. doi: 10.1371/journal.pone.0088364 (PMC3930525; doi:10.1371/journal.pone.0088364)
Supplement: Materials and Methods S2 — R-code for molecular evolution analysis. (R) [file pone.0088364.s004.r]

############# O. taurus vs T. dichotomus ###########################################

#Get input data

seq_data_td_ot <- read.csv("~/WORKING DIRECTORY/td_kaks_input.csv")

#####Basic tests horn-biased genes

#Descriptive stats and wilcoxon

summary(seq_data_td_ot$rawkaks)
    Min. 1st Qu.  Median    Mean 3rd Qu.    Max. 
0.00350 0.03355 0.07410 0.22230 0.14400 5.91300 

sd(seq_data_td_ot$rawkaks)
[1] 0.5999347

#Separate data and do summaries

hornbias_data <- seq_data_td_ot[ which(seq_data_td_ot$HornBias=="Horn"),]
summary(hornbias_data$rawkaks)
    Min. 1st Qu.  Median    Mean 3rd Qu.    Max. 
0.01577 0.13570 0.17410 1.17000 1.88200 3.81100 

sd(hornbias_data$rawkaks)
[1] 1.386879

nonhornbias_data <- seq_data_td_ot[ which(seq_data_td_ot$HornBias=="Non-Horn"),]
summary(nonhornbias_data$rawkaks)
  Min. 1st Qu.  Median    Mean 3rd Qu.    Max. 
0.00350 0.03253 0.07269 0.17850 0.13720 5.91300

sd(nonhornbias_data$rawkaks)
[1] 0.5018719

#Count levels with positive selection

sum(hornbias_data$rawkaks > 1)
[1] 5

sum(nonhornbias_data$rawkaks > 1)
[1] 7

sum(seq_data_td_ot$rawkaks > 1)
[1] 12

shapiro.test(seq_data_td_ot$kaks)

	Shapiro-Wilk normality test

data:  seq_data_td_ot$kaks 
W = 0.9699, p-value = 4.129e-05


#Its not normal, so do a mann-whitney

wilcox.test(rawkaks~HornBias, seq_data_td_ot)

	Wilcoxon rank sum test with continuity correction

data:  rawkaks by HornBias 
W = 2102, p-value = 0.0006903
alternative hypothesis: true location shift is not equal to 0 

#Mean alignment length
mean(seq_data_td_ot$alignmentlength)
[1] 333.2771

sd(seq_data_td_ot$alignmentlength)
[1] 169.5363


##################GLM #############################################################

# un-comment this if you want to use standardized predictors. Changes some of the "significance" of main effects, but the interaction remains as does the general pattern on the contour plot. You would need to change the zlim range in the perspective plot for this.

# seq_data_on_ot$overallexpression <- scale(seq_data_on_ot$overallexpression,scale=T)
# seq_data_on_ot$alignmentlength <- scale(seq_data_on_ot$alignmentlength,scale=T)
# seq_data_on_ot$totaltissues <- scale(seq_data_on_ot$totaltissues,scale=T)
# seq_data_on_ot$seqlength <- scale(seq_data_on_ot$seqlength ,scale=T)
# seq_data_on_ot$SexBias <- scale(seq_data_on_ot$SexBias,scale=T)
# seq_data_on_ot$MorphBias <- scale(seq_data_on_ot$MorphBias,scale=T)

# Requires the following packages to be installed: car, effects, lattice

require(car)
require(effects)
require(lattice)

#functions from Pitchers et al 2013, Evolution 67(2): 438-452


Rsq <- function( model ){
 	fitted.variance <- var(model$fitted)
 	total.variance	<- var(model$fitted) + var(model$resid)
 	fitted.variance / total.variance
 }
 
 
 PRsq <- function( model ){
 	residual.variance <- var(model$resid)
 	variables <- attr(terms(model), "term.labels")
 		model.length <- length(variables)
 		variable.name <- rep(NA, model.length )
 		partial.Rsq <- rep(NA, model.length )
 			
 	for (i in 1:model.length){
 		variable.name[i] <- variables[i]
 		drop <- parse( text=variables[i] )
 		new.formula <- as.formula( paste( ".~.-", variables[i], sep=""))
 		new.model <- update(model, new.formula )
 		partial.Rsq[i] <- (var(new.model$resid) - residual.variance)/ var(new.model$resid)
 		}
 	R2 <- Rsq( model )
 	list(Rsquared=R2, partials=data.frame( cbind( variable.name, partial.Rsq ))	)
 }

 ConditionNumber <- function(model=model_lm_on_ot){
 	X <- model.matrix(model)
    eigen_X <- eigen(t(X)%*%X)$values
    sqrt(max(eigen_X)/min(eigen_X))}


#Now run the model

model_lm_td_ot <- lm(kaks ~ overall_expression + alignmentlength + totaltissues + seqlength + SexBias*MorphBias , data=seq_data_td_ot)
summary(model_lm_td_ot)

Call:
lm(formula = kaks ~ overall_expression + alignmentlength + totaltissues + 
    seqlength + SexBias * MorphBias, data = seq_data_td_ot)

     Min       1Q   Median       3Q      Max 
-1.38012 -0.32827  0.00643  0.25648  1.62892 

Coefficients:
                     Estimate Std. Error t value Pr(>|t|)    
(Intercept)        -0.5944052  0.3307614  -1.797 0.073575 .  
overall_expression  0.0263349  0.0238450   1.104 0.270511    
alignmentlength    -0.0007429  0.0002157  -3.443 0.000677 ***
totaltissues        0.0434317  0.0343024   1.266 0.206685    
seqlength           0.0001122  0.0001406   0.798 0.425688    
SexBias             0.3150651  0.1330438   2.368 0.018668 *  
MorphBias           0.3838206  0.1219682   3.147 0.001858 ** 
SexBias:MorphBias   0.1442798  0.0667180   2.163 0.031561 * 
---
Signif. codes:  0 ‘***’ 0.001 ‘**’ 0.01 ‘*’ 0.05 ‘.’ 0.1 ‘ ’ 1 

Residual standard error: 0.5128 on 241 degrees of freedom
Multiple R-squared: 0.1504,	Adjusted R-squared: 0.1257 
F-statistic: 6.095 on 7 and 241 DF,  p-value: 1.448e-06 

confint(model_lm_td_ot)

                            2.5 %        97.5 %
(Intercept)        -1.2459576583  0.0571471967
overall_expression -0.0206362204  0.0733060731
alignmentlength    -0.0011679148 -0.0003179224
totaltissues       -0.0241391292  0.1110024466
seqlength          -0.0001647527  0.0003891106
SexBias             0.0529879781  0.5771422749
MorphBias           0.1435607643  0.6240804424
SexBias:MorphBias   0.0128549824  0.2757046528

model_lm_td_ot2 <- lm(kaks ~  alignmentlength + SexBias*MorphBias , data=seq_data_td_ot)
summary(model_lm_td_ot2)

Call:
lm(formula = kaks ~ alignmentlength + SexBias * MorphBias, data = seq_data_td_ot)

Residuals:
     Min       1Q   Median       3Q      Max 
-1.37550 -0.33512  0.00136  0.28520  1.79867 

Coefficients:
                    Estimate Std. Error t value Pr(>|t|)   
(Intercept)       -0.0997412  0.2048944  -0.487  0.62684   
alignmentlength   -0.0005766  0.0001946  -2.962  0.00336 **
SexBias            0.3271108  0.1296307   2.523  0.01226 * 
MorphBias          0.3877980  0.1219170   3.181  0.00166 **
SexBias:MorphBias  0.1379627  0.0661121   2.087  0.03794 * 
---
Signif. codes:  0 ‘***’ 0.001 ‘**’ 0.01 ‘*’ 0.05 ‘.’ 0.1 ‘ ’ 1 

Residual standard error: 0.5139 on 244 degrees of freedom
Multiple R-squared: 0.1361,	Adjusted R-squared: 0.1219 
F-statistic:  9.61 on 4 and 244 DF,  p-value: 3.122e-07 


#Some model diagnostics
hist(resid(model_lm_td_ot2)) # residuals seem reasonably normal.
par(mfrow=c(2,2))
plot(model_lm_td_ot2)

#Saved as td_plots1.pdf

# Look for colinearity
#check condition number on model with scaled predictors.
model_lm_td_ot_scaled <- lm(kaks ~ scale(overall_expression) + scale(alignmentlength) + scale(totaltissues) + scale(seqlength) + scale(SexBias) + scale(MorphBias) + scale(SexBias):scale(MorphBias), data=seq_data_td_ot)
ConditionNumber(model_lm_td_ot_scaled) # substantial with interaction term (must check with scaled predictors)
[1] 2.746564

#VIF
car::vif(model_lm_td_ot) # the only substantial vif is with interaction and its main effects

overall_expression    alignmentlength       totaltissues          seqlength            SexBias 
          1.140932           1.261866           1.229077           1.157679           6.593589 
          MorphBias  SexBias:MorphBias 
          6.807027          17.159311 

# Partial R2 for each term
PRsq(model_lm_td_ot)

$Rsquared
[1] 0.1504043

$partials
        variable.name         partial.Rsq
1 overall_expression 0.00503571787487151
2    alignmentlength  0.0468928044928218
3       totaltissues 0.00660796220351565
4          seqlength 0.00263501719750918
5            SexBias  0.0227407181509683
6          MorphBias  0.0394691289324522
7  SexBias:MorphBias  0.0190353839074105

#checking quadratic
model_lm_td_ot_quadratic <- lm(kaks ~  alignmentlength + SexBias + MorphBias + SexBias:MorphBias + I(SexBias^2) + I(MorphBias^2) , data=seq_data_td_ot)
summary(model_lm_td_ot_quadratic)

Call:
lm(formula = kaks ~ alignmentlength + SexBias + MorphBias + SexBias:MorphBias + 
    I(SexBias^2) + I(MorphBias^2), data = seq_data_td_ot)

Residuals:
Residuals:
     Min       1Q   Median       3Q      Max 
-1.37477 -0.33416  0.00235  0.28576  1.80025 

Coefficients:
                    Estimate Std. Error t value Pr(>|t|)   
(Intercept)       -0.1057016  0.2239198  -0.472  0.63732   
alignmentlength   -0.0005774  0.0001959  -2.948  0.00351 **
SexBias            0.3099445  0.2755887   1.125  0.26185   
MorphBias          0.4000261  0.1913760   2.090  0.03764 * 
I(SexBias^2)      -0.0014589  0.0898289  -0.016  0.98706   
I(MorphBias^2)     0.0060335  0.0715155   0.084  0.93284   
SexBias:MorphBias  0.1322572  0.1321918   1.000  0.31807    
---
Signif. codes:  0 ‘***’ 0.001 ‘**’ 0.01 ‘*’ 0.05 ‘.’ 0.1 ‘ ’ 1 

Residual standard error: 0.516 on 242 degrees of freedom
Multiple R-squared: 0.1361,	Adjusted R-squared: 0.1147 
F-statistic: 6.356 on 6 and 242 DF,  p-value: 3.153e-06 

# Orthogonal polynomial
model_lm_td_ot_quadratic2 <- lm(kaks ~  alignmentlength + poly(SexBias,2) + poly(MorphBias,2) + SexBias:MorphBias, data=seq_data_td_ot)
summary(model_lm_td_ot_quadratic2)

Call:
lm(formula = kaks ~ alignmentlength + poly(SexBias, 2) + poly(MorphBias, 
    2) + SexBias:MorphBias, data = seq_data_td_ot)

Residuals:
     Min       1Q   Median       3Q      Max 
-1.37477 -0.33416  0.00235  0.28576  1.80025 

Coefficients:
                      Estimate Std. Error t value Pr(>|t|)   
(Intercept)         -1.4150885  0.5002999  -2.828  0.00507 **
alignmentlength     -0.0005774  0.0001959  -2.948  0.00351 **
poly(SexBias, 2)1    3.1197907  2.3952650   1.302  0.19399   
poly(SexBias, 2)2   -0.0122193  0.7523601  -0.016  0.98706   
poly(MorphBias, 2)1  4.1671700  2.5102388   1.660  0.09820  
poly(MorphBias, 2)2  0.0709045  0.8404374   0.084  0.93284   
SexBias:MorphBias    0.1322572  0.1321918   1.000  0.31807   
---
Signif. codes:  0 ‘***’ 0.001 ‘**’ 0.01 ‘*’ 0.05 ‘.’ 0.1 ‘ ’ 1 

Residual standard error: 0.516 on 242 degrees of freedom
Multiple R-squared: 0.1361,	Adjusted R-squared: 0.1147 
F-statistic: 6.356 on 6 and 242 DF,  p-value: 3.153e-06 

# Some useful plotting
# length of data
n <- 50 #length(seq_data_td_ot$kaks)
SB <- with(seq_data_td_ot, seq(min(SexBias), max(SexBias), length.out=n))
MB <- with(seq_data_td_ot, seq(min(MorphBias), max(MorphBias), length.out=n))
params <- coef(model_lm_td_ot) # parameters from the model

# We are only generating predicted values of KaKs given SexBias and MorphBias
f <- function(x=SB,y=MB){z <- params[1] + params[6]*x + params[7]*y + params[8]*x*y}

z <- outer(SB, MB, f)

#I CAN'T GET THIS TO WORK. See wrror message below
persp(SB,MB,z,
    theta=45, phi=15, box=T, col="grey", shade=0.05, ticktype="detailed", lphi=180,
    xlab= "SB", ylab = "MB", zlab="predicted KaKs (model adjusted)", axes=T, 
    xlim=range(SB), ylim=range(MB), zlim=c(0.3, 2.3), border=F,
    main="Influence of SexBias and MorphBias on KaKs")
mtext(side=3, text=expression(paste(italic(Onthophagus), " ",italic(taurus), " VS. ", italic(Trypoxylus, " ", italic(dichotomus) )))

#Warning message:
#In persp.default(SB, MB, z, theta = 45, phi = 15, box = T, col = "grey",  :
#  surface extends beyond the box


# Setting up the perspective for the scatterplot  
#I CAN'T GET THIS TO WORK
res <- persp(SB,MB,z,
    theta=45, phi=15, zlim=c(0.3, 2.3)) 

#"Warning message:
#In persp.default(SB, MB, z, theta = 45, phi = 15, zlim = c(0.3,  :
#  surface extends beyond the box"


#fancy contour
with(seq_data_td_ot, filled.contour(z=z, x=SB, y=MB, 
    ylim=c(min(MB), max(MB)), xlim=c(min(SB), max(SB)), 
    xlab="SexBias (model adjusted)", ylab="MorphBias (model adjusted)", color = heat.colors,
    # to plot points in the squished frame set up by filled.contour use...
    plot.axes={axis(1); axis(2); # puts back axis
    	points(x=SexBias, y=MorphBias, pch=16, cex=0.9, # call points like you would externally
        col=densCols(x=SexBias, y=MorphBias, nbin=20))},
    main="Influence of SexBias and MorphBias on KaKs"))
    
#saved as td_contour_plot.pdf


####################### O. taurus vs O. nigriventris ###################################

#Get input data

seq_data_on_ot <- read.csv("INFILE.csv")

#####Basic tests horn-biased genes

#Descriptive stats and wilcoxon

summary(seq_data_on_ot$rawkaks)
    Min.  1st Qu.   Median     Mean  3rd Qu.     Max. 
0.001729 0.029530 0.063690 0.271600 0.136300 8.419000

sd(seq_data_on_ot$rawkaks)
[1] 0.8521712

#Separate data and do summaries

hornbias_data <- seq_data_on_ot[ which(seq_data_on_ot$HornBias=="Horn"),]
summary(hornbias_data$rawkaks)
    Min.  1st Qu.   Median     Mean  3rd Qu.     Max. 
0.007369 0.077500 0.128800 0.542900 0.164500 3.663000 

sd(hornbias_data$rawkaks)
[1] 1.040737

summary(nonhornbias_data$rawkaks)
    Min.  1st Qu.   Median     Mean  3rd Qu.     Max. 
0.001729 0.029090 0.062700 0.265400 0.132600 8.419000 

sd(nonhornbias_data$rawkaks)
[1] 0.84721

#Count levels with positive selection

sum(hornbias_data$rawkaks > 1)
[1] 3

sum(nonhornbias_data$rawkaks > 1)
[1] 47

sum(seq_data_on_ot$rawkaks > 1)
[1] 50

shapiro.test(seq_data_on_ot$kaks)

	Shapiro-Wilk normality test

data:  seq_data_on_ot$kaks 
W = 0.9637, p-value = 8.553e-13


#Its not normal, so do a mann-whitney/wilcoxon

wilcox.test(rawkaks~HornBias, seq_data_on_ot)

	Wilcoxon rank sum test with continuity correction

data:  kaks by HornBias 
W = 8200, p-value = 0.03637
alternative hypothesis: true location shift is not equal to 0

mean(seq_data_on_ot$alignmentlength)
[1] 472.5808

sd(seq_data_on_ot$alignmentlength)
[1] 222.1945


#######GLM Re-creation

# un-comment this if you want to use standardized predictors. Changes some of the "significance" of main effects, but the interaction remains as does the general pattern on the contour plot. You would need to change the zlim range in the perspective plot for this.

# seq_data_on_ot$overallexpression <- scale(seq_data_on_ot$overallexpression,scale=T)
# seq_data_on_ot$alignmentlength <- scale(seq_data_on_ot$alignmentlength,scale=T)
# seq_data_on_ot$totaltissues <- scale(seq_data_on_ot$totaltissues,scale=T)
# seq_data_on_ot$seqlength <- scale(seq_data_on_ot$seqlength ,scale=T)
# seq_data_on_ot$SexBias <- scale(seq_data_on_ot$SexBias,scale=T)
# seq_data_on_ot$MorphBias <- scale(seq_data_on_ot$MorphBias,scale=T)

# Requires the following packages to be installed: car, effects, lattice

require(car)
require(effects)
require(lattice)

#functions from Pitchers et al 2013, Evolution 67(2): 438-452


Rsq <- function( model ){
 	fitted.variance <- var(model$fitted)
 	total.variance	<- var(model$fitted) + var(model$resid)
 	fitted.variance / total.variance
 }
 
 
 PRsq <- function( model ){
 	residual.variance <- var(model$resid)
 	variables <- attr(terms(model), "term.labels")
 		model.length <- length(variables)
 		variable.name <- rep(NA, model.length )
 		partial.Rsq <- rep(NA, model.length )
 			
 	for (i in 1:model.length){
 		variable.name[i] <- variables[i]
 		drop <- parse( text=variables[i] )
 		new.formula <- as.formula( paste( ".~.-", variables[i], sep=""))
 		new.model <- update(model, new.formula )
 		partial.Rsq[i] <- (var(new.model$resid) - residual.variance)/ var(new.model$resid)
 		}
 	R2 <- Rsq( model )
 	list(Rsquared=R2, partials=data.frame( cbind( variable.name, partial.Rsq ))	)
 }
 
 ConditionNumber <- function(model=model_lm_on_ot){
 	X <- model.matrix(model)
    eigen_X <- eigen(t(X)%*%X)$values
    sqrt(max(eigen_X)/min(eigen_X))}
    
    
#Now run the model

model_lm_on_ot <- lm(kaks ~ overall_expression + alignmentlength + totaltissues + seqlength + SexBias*MorphBias , data=seq_data_on_ot)
summary(model_lm_on_ot)

Call:
lm(formula = kaks ~ overall_expression + alignmentlength + totaltissues + 
    seqlength + SexBias * MorphBias, data = seq_data_on_ot)

Residuals:
     Min       1Q   Median       3Q      Max 
-1.59098 -0.35640 -0.03322  0.30109  2.23733 

Coefficients:
                     Estimate Std. Error t value Pr(>|t|)    
(Intercept)        -3.700e-01  2.327e-01  -1.590  0.11226    
overall_expression -1.332e-02  1.662e-02  -0.802  0.42309    
alignmentlength    -8.687e-04  1.110e-04  -7.829 1.67e-14 ***
totaltissues        1.922e-02  2.079e-02   0.924  0.35564    
seqlength           2.007e-04  9.617e-05   2.087  0.03726 *  
SexBias             2.012e-01  8.383e-02   2.400  0.01663 *  
MorphBias           2.297e-01  8.169e-02   2.812  0.00505 ** 
SexBias:MorphBias   9.171e-02  4.090e-02   2.243  0.02521 *  
---
Signif. codes:  0 ‘***’ 0.001 ‘**’ 0.01 ‘*’ 0.05 ‘.’ 0.1 ‘ ’ 1 

Residual standard error: 0.5847 on 753 degrees of freedom
Multiple R-squared: 0.1053,	Adjusted R-squared: 0.09702 
F-statistic: 12.67 on 7 and 753 DF,  p-value: 2.014e-15 


confint(model_lm_on_ot)

(Intercept)        -8.267418e-01  0.0868284968
overall_expression -4.593947e-02  0.0193023286
alignmentlength    -1.086504e-03 -0.0006508461
totaltissues       -2.159994e-02  0.0600348915
seqlength           1.187895e-05  0.0003894841
SexBias             3.664744e-02  0.3658032795
MorphBias           6.937386e-02  0.3901159784
SexBias:MorphBias   1.142944e-02  0.1719979378

model_lm_on_ot2 <- lm(kaks ~  alignmentlength + seqlength + SexBias*MorphBias , data=seq_data_on_ot)
summary(model_lm_on_ot2)

Call:
lm(formula = kaks ~ alignmentlength + seqlength + SexBias * MorphBias, 
    data = seq_data_on_ot)


Residuals:
     Min       1Q   Median       3Q      Max 
-1.56224 -0.35808 -0.02676  0.29507  2.23154 

Coefficients:
                    Estimate Std. Error t value Pr(>|t|)    
(Intercept)       -4.232e-01  1.575e-01  -2.687  0.00737 ** 
alignmentlength   -8.738e-04  1.104e-04  -7.916 8.78e-15 ***
seqlength          2.017e-04  9.599e-05   2.101  0.03594 *  
SexBias            2.150e-01  8.287e-02   2.594  0.00966 ** 
MorphBias          2.329e-01  8.117e-02   2.869  0.00423 ** 
SexBias:MorphBias  9.330e-02  4.085e-02   2.284  0.02265 *  
---
Signif. codes:  0 ‘***’ 0.001 ‘**’ 0.01 ‘*’ 0.05 ‘.’ 0.1 ‘ ’ 1 

Residual standard error: 0.5844 on 755 degrees of freedom
Multiple R-squared: 0.1038,	Adjusted R-squared: 0.09787 
F-statistic: 17.49 on 5 and 755 DF,  p-value: < 2.2e-16 

#Some model diagnostics
hist(resid(model_lm_on_ot2)) # residuals seem reasonably normal.
par(mfrow=c(2,2))
plot(model_lm_on_ot2)

#Saved as on_plots1.pdf

# Look for colinearity
#check condition number on model with scaled predictors.
model_lm_on_ot_scaled <- lm(kaks ~ scale(overall_expression) + scale(alignmentlength) + scale(totaltissues) + scale(seqlength) + scale(SexBias) + scale(MorphBias) + scale(SexBias):scale(MorphBias), data=seq_data_on_ot)
ConditionNumber(model_lm_on_ot_scaled) # substantial with interaction term (must check with scaled predictors)

[1] 2.351688

#VIF
car::vif(model_lm_on_ot) # the only substantial vif is with interaction and its main effects

overall_expression    alignmentlength       totaltissues          seqlength            SexBias          MorphBias  SexBias:MorphBias 
          1.077633           1.351218           1.179097           1.334553           6.560643           6.723063          16.609127 
          
# Partial R2 for each term
PRsq(model_lm_on_ot)

$Rsquared
[1] 0.1053345

$partials
       variable.name         partial.Rsq
1 overall_expression 0.00085241594075187
2    alignmentlength  0.0752660658771277
3       totaltissues 0.00113320304425726
4          seqlength 0.00574901478811746
5            SexBias  0.0075929510113992
6          MorphBias  0.0103944237588321
7  SexBias:MorphBias 0.00663460507754313

#checking quadratic
model_lm_on_ot_quadratic <- lm(kaks ~  alignmentlength + seqlength + SexBias + MorphBias + SexBias:MorphBias + I(SexBias^2) + I(MorphBias^2) , data=seq_data_on_ot)
summary(model_lm_on_ot_quadratic)

Call:
lm(formula = kaks ~ alignmentlength + seqlength + SexBias + MorphBias + 
    SexBias:MorphBias + I(SexBias^2) + I(MorphBias^2), data = seq_data_on_ot)

Residuals:
     Min       1Q   Median       3Q      Max 
-1.55734 -0.36217 -0.02941  0.29590  2.24227 

Coefficients:
                    Estimate Std. Error t value Pr(>|t|)    
(Intercept)       -3.995e-01  1.623e-01  -2.462   0.0141 *  
alignmentlength   -8.793e-04  1.106e-04  -7.949 6.88e-15 ***
seqlength          1.995e-04  9.608e-05   2.076   0.0382 *  
SexBias            2.284e-01  1.505e-01   1.518   0.1295    
MorphBias          2.581e-01  1.277e-01   2.021   0.0436 *  
I(SexBias^2)       3.535e-02  4.534e-02   0.780   0.4357    
I(MorphBias^2)     4.012e-02  4.143e-02   0.968   0.3332    
SexBias:MorphBias  2.773e-02  7.117e-02   0.390   0.6969    
---
Signif. codes:  0 ‘***’ 0.001 ‘**’ 0.01 ‘*’ 0.05 ‘.’ 0.1 ‘ ’ 1 

Residual standard error: 0.5847 on 753 degrees of freedom
Multiple R-squared: 0.1053,	Adjusted R-squared: 0.097 
F-statistic: 12.66 on 7 and 753 DF,  p-value: 2.024e-15 

# Orthogonal polynomial
model_lm_on_ot_quadratic2 <- lm(kaks ~  alignmentlength + poly(SexBias,2) + poly(MorphBias,2) + SexBias:MorphBias, data=seq_data_on_ot)
summary(model_lm_on_ot_quadratic2)

Call:
lm(formula = kaks ~ alignmentlength + poly(SexBias, 2) + poly(MorphBias, 
    2) + SexBias:MorphBias, data = seq_data_on_ot)

Residuals:
     Min       1Q   Median       3Q      Max 
-1.58402 -0.35851 -0.03112  0.28964  2.24649 

Coefficients:
                      Estimate Std. Error t value Pr(>|t|)    
(Intercept)         -9.066e-01  2.919e-01  -3.106  0.00197 ** 
alignmentlength     -7.654e-04  9.627e-05  -7.951 6.78e-15 ***
poly(SexBias, 2)1    1.716e+00  2.452e+00   0.700  0.48408    
poly(SexBias, 2)2    6.797e-01  8.027e-01   0.847  0.39739    
poly(MorphBias, 2)1  2.011e+00  2.497e+00   0.805  0.42093    
poly(MorphBias, 2)2  8.109e-01  8.327e-01   0.974  0.33046    
SexBias:MorphBias    2.713e-02  7.132e-02   0.380  0.70372    
---
Signif. codes:  0 ‘***’ 0.001 ‘**’ 0.01 ‘*’ 0.05 ‘.’ 0.1 ‘ ’ 1 

Residual standard error: 0.586 on 754 degrees of freedom
Multiple R-squared: 0.1002,	Adjusted R-squared: 0.09304 
F-statistic: 13.99 on 6 and 754 DF,  p-value: 3.896e-15 

# Some useful plotting
# length of data
n <- 50 #length(seq_data_on_ot$kaks)
SB <- with(seq_data_on_ot, seq(min(SexBias), max(SexBias), length.out=n))
MB <- with(seq_data_on_ot, seq(min(MorphBias), max(MorphBias), length.out=n))
params <- coef(model_lm_on_ot) # parameters from the model

# We are only generating predicted values of KaKs given SexBias and MorphBias
f <- function(x=SB,y=MB){
	z <- params[1] + params[6]*x + params[7]*y + params[8]*x*y}

z <- outer(SB, MB, f)

#I CAN'T GET THIS TO WORK # The alignements are off. 
persp(SB,MB,z,
    theta=45, phi=15, box=T, col="grey", shade=0.05, ticktype="detailed", lphi=180,
    xlab= "SB", ylab = "MB", zlab="predicted KaKs (model adjusted)", axes=T, 
    xlim=range(SB), ylim=range(MB), zlim=c(0.3, 2.3), border=F,
    main="influence of SexBias and MorphBias on KaKs")
mtext(side=3, text=expression(paste(italic(Onthophagus), " ",italic(taurus), " VS. ", italic(nigriventris) )))

# Setting up the perspective for the scatterplot    

res <- persp(SB,MB,z,
    theta=45, phi=15, zlim=c(0.3, 2.3)) 
    
#fancy contour #This does work for O.nig data
with(seq_data_on_ot, filled.contour(z=z, x=SB, y=MB, 
    ylim=c(min(MB), max(MB)), xlim=c(min(SB), max(SB)), 
    xlab="SexBias (model adjusted)", ylab="MorphBias (model adjusted)", color = heat.colors,
    # to plot points in the squished frame set up by filled.contour use...
    plot.axes={axis(1); axis(2); # puts back axis
    	points(x=SexBias, y=MorphBias, pch=16, cex=0.9, # call points like you would externally
        col=densCols(x=SexBias, y=MorphBias, nbin=20))},
    main="Influence of SexBias and MorphBias on KaKs"))
    
