# Supplementary material for: Insights into the Development and Evolution of Exaggerated Traits Using De Novo Transcriptomes of Two Species of Horned Scarab Beetles
Source: PLoS One. 2014 Feb 20;9(2):e88364. doi: 10.1371/journal.pone.0088364 (PMC3930525; doi:10.1371/journal.pone.0088364)
Supplement: Results File S1 — Summary of all GO terms for T. dichotomus and O. nigriventris assemblies. (XLSX) [file pone.0088364.s005.xlsx]

## Sheet: T.dichotomus Molecular function
Hit	GO Term	Description	Type	Frequency
isotig00207	GO:0003995	acyl-CoA dehydrogenase activity	F	1
isotig00226	GO:0004586	ornithine decarboxylase activity	F	1
isotig00284	GO:0071208	histone pre-mRNA DCP binding	F	1
isotig00342	GO:0016615	malate dehydrogenase activity	F	1
isotig00408	GO:0050811	GABA receptor binding	F	1
isotig00408	GO:0048487	beta-tubulin binding	F	1
isotig00412	GO:0032947	protein complex scaffold	F	1
isotig00430	GO:0030976	thiamine pyrophosphate binding	F	1
isotig00432	GO:0004373	glycogen (starch) synthase activity	F	1
isotig00510	GO:0016779	nucleotidyltransferase activity	F	1
isotig00518	GO:0050115	myosin-light-chain-phosphatase activity	F	1
isotig00518	GO:0004721	phosphoprotein phosphatase activity	F	1
isotig00558	GO:0004139	deoxyribose-phosphate aldolase activity	F	1
isotig00576	GO:0005355	glucose transmembrane transporter activity	F	1
isotig00616	GO:0004363	glutathione synthase activity	F	1
isotig00616	GO:0043295	glutathione binding	F	1
isotig00682	GO:0030911	TPR domain binding	F	1
isotig00714	GO:0017025	TBP-class protein binding	F	1
isotig00714	GO:0008301	DNA binding, bending	F	1
isotig00716	GO:0031370	eukaryotic initiation factor 4G binding	F	1
isotig00723	GO:0030544	Hsp70 protein binding	F	1
isotig00736	GO:0004511	tyrosine 3-monooxygenase activity	F	1
isotig00749	GO:0004643	phosphoribosylaminoimidazolecarboxamide formyltransferase activity	F	1
isotig00749	GO:0003937	IMP cyclohydrolase activity	F	1
isotig00778	GO:0004043	L-aminoadipate-semialdehyde dehydrogenase activity	F	1
isotig00789	GO:0034483	heparan sulfate sulfotransferase activity	F	1
isotig00789	GO:0034481	chondroitin sulfotransferase activity	F	1
isotig00791	GO:0004030	aldehyde dehydrogenase [NAD(P)+] activity	F	1
isotig00821	GO:0004190	aspartic-type endopeptidase activity	F	1
isotig00828	GO:0015317	phosphate:hydrogen symporter activity	F	1
isotig00850	GO:0004054	arginine kinase activity	F	1
isotig00866	GO:0046873	metal ion transmembrane transporter activity	F	1
isotig00882	GO:0003989	acetyl-CoA carboxylase activity	F	1
isotig00882	GO:0009374	biotin binding	F	1
isotig00885	GO:0042132	fructose 1,6-bisphosphate 1-phosphatase activity	F	1
isotig00885	GO:0004331	fructose-2,6-bisphosphate 2-phosphatase activity	F	1
isotig00894	GO:0008010	structural constituent of chitin-based larval cuticle	F	1
isotig00894	GO:0004197	cysteine-type endopeptidase activity	F	1
isotig00916	GO:0004155	6,7-dihydropteridine reductase activity	F	1
isotig00918	GO:0030060	L-malate dehydrogenase activity	F	1
isotig00931	GO:0008750	NAD(P)+ transhydrogenase (AB-specific) activity	F	1
isotig00944	GO:0046914	transition metal ion binding	F	1
isotig00947	GO:0035064	methylated histone residue binding	F	1
isotig00947	GO:0042826	histone deacetylase binding	F	1
isotig00948	GO:0051010	microtubule plus-end binding	F	1
isotig00975	GO:0004722	protein serine/threonine phosphatase activity	F	1
isotig01000	GO:0005544	calcium-dependent phospholipid binding	F	1
isotig01004	GO:0004807	triose-phosphate isomerase activity	F	1
isotig01017	GO:0042500	aspartic endopeptidase activity, intramembrane cleaving	F	1
isotig01022	GO:0004165	dodecenoyl-CoA delta-isomerase activity	F	1
isotig01052	GO:0032422	purine-rich negative regulatory element binding	F	1
isotig01052	GO:0046332	SMAD binding	F	1
isotig01071	GO:0032791	lead ion binding	F	1
isotig01071	GO:0004655	porphobilinogen synthase activity	F	1
isotig01098	GO:0005098	Ran GTPase activator activity	F	1
isotig01121	GO:0004619	phosphoglycerate mutase activity	F	1
isotig01168	GO:0044020	histone methyltransferase activity (H4-R3 specific)	F	1
isotig01169	GO:0016937	short-branched-chain-acyl-CoA dehydrogenase activity	F	1
isotig01181	GO:0015103	inorganic anion transmembrane transporter activity	F	1
isotig01181	GO:0015556	C4-dicarboxylate transmembrane transporter activity	F	1
isotig01202	GO:0052843	inositol-1-diphosphate-2,3,4,5,6-pentakisphosphate diphosphatase activity	F	1
isotig01202	GO:0052844	inositol-3-diphosphate-1,2,4,5,6-pentakisphosphate diphosphatase activity	F	1
isotig01202	GO:0052840	inositol diphosphate tetrakisphosphate diphosphatase activity	F	1
isotig01202	GO:0052846	inositol-1,5-bisdiphosphate-2,3,4,6-tetrakisphosphate 1-diphosphatase activity	F	1
isotig01202	GO:0008486	diphosphoinositol-polyphosphate diphosphatase activity	F	1
isotig01202	GO:0052848	inositol-3,5-bisdiphosphate-2,3,4,6-tetrakisphosphate 5-diphosphatase activity	F	1
isotig01202	GO:0052847	inositol-1,5-bisdiphosphate-2,3,4,6-tetrakisphosphate 5-diphosphatase activity	F	1
isotig01202	GO:0052845	inositol-5-diphosphate-1,2,3,4,6-pentakisphosphate diphosphatase activity	F	1
isotig01214	GO:0022857	transmembrane transporter activity	F	1
isotig01233	GO:0046570	methylthioribulose 1-phosphate dehydratase activity	F	1
isotig01242	GO:0019887	protein kinase regulator activity	F	1
isotig01270	GO:0004364	glutathione transferase activity	F	1
isotig01270	GO:0018833	DDT-dehydrochlorinase activity	F	1
isotig01275	GO:0005476	carnitine:acyl carnitine antiporter activity	F	1
isotig01290	GO:0030374	ligand-dependent nuclear receptor transcription coactivator activity	F	1
isotig01324	GO:0050145	nucleoside phosphate kinase activity	F	1
isotig01324	GO:0004798	thymidylate kinase activity	F	1
isotig01327	GO:0047022	7-beta-hydroxysteroid dehydrogenase (NADP+) activity	F	1
isotig01327	GO:0018454	acetoacetyl-CoA reductase activity	F	1
isotig01327	GO:0047035	testosterone dehydrogenase (NAD+) activity	F	1
isotig01333	GO:0015662	ATPase activity, coupled to transmembrane movement of ions, phosphorylative mechanism	F	1
isotig01347	GO:0004342	glucosamine-6-phosphate deaminase activity	F	1
isotig01363	GO:0051537	2 iron, 2 sulfur cluster binding	F	1
isotig01408	GO:0008480	sarcosine dehydrogenase activity	F	1
isotig01421	GO:0004803	transposase activity	F	1
isotig01421	GO:0043566	structure-specific DNA binding	F	1
isotig01447	GO:0004816	asparagine-tRNA ligase activity	F	1
isotig01463	GO:0004602	glutathione peroxidase activity	F	1
isotig01463	GO:0008379	thioredoxin peroxidase activity	F	1
isotig01489	GO:0003978	UDP-glucose 4-epimerase activity	F	1
isotig01522	GO:0017057	6-phosphogluconolactonase activity	F	1
isotig01546	GO:0019888	protein phosphatase regulator activity	F	1
isotig01546	GO:0019212	phosphatase inhibitor activity	F	1
isotig01556	GO:0004019	adenylosuccinate synthase activity	F	1
isotig01567	GO:0060090	binding, bridging	F	1
isotig01574	GO:0046974	histone methyltransferase activity (H3-K9 specific)	F	1
isotig01578	GO:0010309	acireductone dioxygenase [iron(II)-requiring] activity	F	1
isotig01579	GO:0017022	myosin binding	F	1
isotig01597	GO:0005537	mannose binding	F	1
isotig01600	GO:0003878	ATP citrate synthase activity	F	1
isotig01613	GO:0015194	L-serine transmembrane transporter activity	F	1
isotig01626	GO:0043027	cysteine-type endopeptidase inhibitor activity involved in apoptotic process	F	1
isotig01627	GO:0001530	lipopolysaccharide binding	F	1
isotig01638	GO:0008124	4-alpha-hydroxytetrahydrobiopterin dehydratase activity	F	1
isotig01655	GO:0008524	glucose 6-phosphate:phosphate antiporter activity	F	1
isotig01697	GO:0004557	alpha-galactosidase activity	F	1
isotig01702	GO:0003826	alpha-ketoacid dehydrogenase activity	F	1
isotig01706	GO:0008466	glycogenin glucosyltransferase activity	F	1
isotig01712	GO:0051059	NF-kappaB binding	F	1
isotig01713	GO:0017112	Rab guanyl-nucleotide exchange factor activity	F	1
isotig01717	GO:0003939	L-iditol 2-dehydrogenase activity	F	1
isotig01722	GO:0001076	RNA polymerase II transcription factor binding transcription factor activity	F	1
isotig01754	GO:0003870	5-aminolevulinate synthase activity	F	1
isotig01755	GO:0016717	oxidoreductase activity, acting on paired donors, with oxidation of a pair of donors resulting in the reduction of molecular oxygen to two molecules of water	F	1
isotig01777	GO:0005070	SH3/SH2 adaptor activity	F	1
isotig01781	GO:0019781	NEDD8 activating enzyme activity	F	1
isotig01785	GO:0051435	BH4 domain binding	F	1
isotig01785	GO:0030159	receptor signaling complex scaffold activity	F	1
isotig01785	GO:0017166	vinculin binding	F	1
isotig01791	GO:0018169	ribosomal S6-glutamic acid ligase activity	F	1
isotig01816	GO:0005315	inorganic phosphate transmembrane transporter activity	F	1
isotig01826	GO:0016289	CoA hydrolase activity	F	1
isotig01827	GO:0004683	calmodulin-dependent protein kinase activity	F	1
isotig01833	GO:0030612	arsenate reductase (thioredoxin) activity	F	1
isotig01833	GO:0015036	disulfide oxidoreductase activity	F	1
isotig01840	GO:0004693	cyclin-dependent protein kinase activity	F	1
isotig01977	GO:0004108	citrate (Si)-synthase activity	F	1
isotig01995	GO:0030515	snoRNA binding	F	1
isotig02017	GO:0018738	S-formylglutathione hydrolase activity	F	1
isotig02017	GO:0004091	carboxylesterase activity	F	1
isotig02021	GO:0003847	1-alkyl-2-acetylglycerophosphocholine esterase activity	F	1
isotig02022	GO:0004372	glycine hydroxymethyltransferase activity	F	1
isotig02051	GO:0004180	carboxypeptidase activity	F	1
isotig02068	GO:0070402	NADPH binding	F	1
isotig02068	GO:0030267	glyoxylate reductase (NADP) activity	F	1
isotig02068	GO:0016618	hydroxypyruvate reductase activity	F	1
isotig02068	GO:0008465	glycerate dehydrogenase activity	F	1
isotig02077	GO:0016798	hydrolase activity, acting on glycosyl bonds	F	1
isotig02092	GO:0004751	ribose-5-phosphate isomerase activity	F	1
isotig02099	GO:0004853	uroporphyrinogen decarboxylase activity	F	1
isotig02104	GO:0004347	glucose-6-phosphate isomerase activity	F	1
isotig02113	GO:0005201	extracellular matrix structural constituent	F	1
isotig02115	GO:0008453	alanine-glyoxylate transaminase activity	F	1
isotig02115	GO:0004760	serine-pyruvate transaminase activity	F	1
isotig02115	GO:0016597	amino acid binding	F	1
isotig02135	GO:0004647	phosphoserine phosphatase activity	F	1
isotig02140	GO:0008142	oxysterol binding	F	1
isotig02151	GO:0052854	medium-chain-(S)-2-hydroxy-acid oxidase activity	F	1
isotig02151	GO:0052852	very-long-chain-(S)-2-hydroxy-acid oxidase activity	F	1
isotig02151	GO:0008891	glycolate oxidase activity	F	1
isotig02151	GO:0052853	long-chain-(S)-2-hydroxy-long-chain-acid oxidase activity	F	1
isotig02207	GO:0005484	SNAP receptor activity	F	1
isotig02233	GO:0016705	oxidoreductase activity, acting on paired donors, with incorporation or reduction of molecular oxygen	F	1
isotig02237	GO:0042834	peptidoglycan binding	F	1
isotig02241	GO:0017091	AU-rich element binding	F	1
isotig02242	GO:0046525	xylosylprotein 4-beta-galactosyltransferase activity	F	1
isotig02295	GO:0015020	glucuronosyltransferase activity	F	1
isotig02295	GO:0001972	retinoic acid binding	F	1
isotig02309	GO:0050353	trimethyllysine dioxygenase activity	F	1
isotig02324	GO:0004813	alanine-tRNA ligase activity	F	1
isotig02338	GO:0004610	phosphoacetylglucosamine mutase activity	F	1
isotig02339	GO:0016168	chlorophyll binding	F	1
isotig02363	GO:0003712	transcription cofactor activity	F	1
isotig02374	GO:0004360	glutamine-fructose-6-phosphate transaminase (isomerizing) activity	F	1
isotig02391	GO:0019811	cocaine binding	F	1
isotig02391	GO:0004059	aralkylamine N-acetyltransferase activity	F	1
isotig02391	GO:0004060	arylamine N-acetyltransferase activity	F	1
isotig02391	GO:0005329	dopamine transmembrane transporter activity	F	1
isotig02415	GO:0071813	lipoprotein particle binding	F	1
isotig02415	GO:0034185	apolipoprotein binding	F	1
isotig02425	GO:0070063	RNA polymerase binding	F	1
isotig02425	GO:0030331	estrogen receptor binding	F	1
isotig02437	GO:0008113	peptide-methionine-(S)-S-oxide reductase activity	F	1
isotig02440	GO:0030337	DNA polymerase processivity factor activity	F	1
isotig02450	GO:0015175	neutral amino acid transmembrane transporter activity	F	1
isotig02450	GO:0015179	L-amino acid transmembrane transporter activity	F	1
isotig02467	GO:0048408	epidermal growth factor binding	F	1
isotig02468	GO:0000340	RNA 7-methylguanosine cap binding	F	1
isotig02472	GO:0016174	NAD(P)H oxidase activity	F	1
isotig02506	GO:0052632	citrate hydro-lyase (cis-aconitate-forming) activity	F	1
isotig02506	GO:0052633	isocitrate hydro-lyase (cis-aconitate-forming) activity	F	1
isotig02515	GO:0000979	RNA polymerase II core promoter sequence-specific DNA binding	F	1
isotig02515	GO:0035259	glucocorticoid receptor binding	F	1
isotig02522	GO:0017081	chloride channel regulator activity	F	1
isotig02612	GO:0030742	GTP-dependent protein binding	F	1
isotig02625	GO:0001786	phosphatidylserine binding	F	1
isotig02625	GO:0005546	phosphatidylinositol-4,5-bisphosphate binding	F	1
isotig02640	GO:0008430	selenium binding	F	1
isotig02662	GO:0030942	endoplasmic reticulum signal peptide binding	F	1
isotig02672	GO:0003725	double-stranded RNA binding	F	1
isotig02712	GO:0004725	protein tyrosine phosphatase activity	F	1
isotig02712	GO:0003993	acid phosphatase activity	F	1
isotig02714	GO:0008336	gamma-butyrobetaine dioxygenase activity	F	1
isotig02743	GO:0004032	alditol:NADP+ 1-oxidoreductase activity	F	1
isotig02743	GO:0047006	17-alpha,20-alpha-dihydroxypregn-4-en-3-one dehydrogenase activity	F	1
isotig02782	GO:0003874	6-pyruvoyltetrahydropterin synthase activity	F	1
isotig02783	GO:0008375	acetylglucosaminyltransferase activity	F	1
isotig02802	GO:0008260	3-oxoacid CoA-transferase activity	F	1
isotig02805	GO:0008426	protein kinase C inhibitor activity	F	1
isotig02825	GO:0004449	isocitrate dehydrogenase (NAD+) activity	F	1
isotig02835	GO:0004791	thioredoxin-disulfide reductase activity	F	1
isotig02845	GO:0004829	threonine-tRNA ligase activity	F	1
isotig02855	GO:0016788	hydrolase activity, acting on ester bonds	F	1
isotig02866	GO:0004661	protein geranylgeranyltransferase activity	F	1
isotig02866	GO:0043014	alpha-tubulin binding	F	1
isotig02879	GO:0070006	metalloaminopeptidase activity	F	1
isotig02882	GO:0008474	palmitoyl-(protein) hydrolase activity	F	1
isotig02882	GO:0016290	palmitoyl-CoA hydrolase activity	F	1
isotig02901	GO:0050750	low-density lipoprotein particle receptor binding	F	1
isotig02906	GO:0004430	1-phosphatidylinositol 4-kinase activity	F	1
isotig02907	GO:0001075	RNA polymerase II core promoter sequence-specific DNA binding transcription factor activity involved in preinitiation complex assembly	F	1
isotig02914	GO:0016747	transferase activity, transferring acyl groups other than amino-acyl groups	F	1
isotig02925	GO:0005097	Rab GTPase activator activity	F	1
isotig02939	GO:0043995	histone acetyltransferase activity (H4-K5 specific)	F	1
isotig02939	GO:0046972	histone acetyltransferase activity (H4-K16 specific)	F	1
isotig02939	GO:0043996	histone acetyltransferase activity (H4-K8 specific)	F	1
isotig02944	GO:0008201	heparin binding	F	1
isotig02951	GO:0016929	SUMO-specific protease activity	F	1
isotig02952	GO:0004772	sterol O-acyltransferase activity	F	1
isotig02953	GO:0048306	calcium-dependent protein binding	F	1
isotig02988	GO:0004402	histone acetyltransferase activity	F	1
isotig02988	GO:0008168	methyltransferase activity	F	1
isotig02997	GO:0004824	lysine-tRNA ligase activity	F	1
isotig03000	GO:0016297	acyl-[acyl-carrier-protein] hydrolase activity	F	1
isotig03047	GO:0042301	phosphate ion binding	F	1
isotig03047	GO:0002060	purine nucleobase binding	F	1
isotig03047	GO:0001882	nucleoside binding	F	1
isotig03047	GO:0004731	purine-nucleoside phosphorylase activity	F	1
isotig03057	GO:0004017	adenylate kinase activity	F	1
isotig03067	GO:0042799	histone methyltransferase activity (H4-K20 specific)	F	1
isotig03103	GO:0003842	1-pyrroline-5-carboxylate dehydrogenase activity	F	1
isotig03157	GO:0016508	long-chain-enoyl-CoA hydratase activity	F	1
isotig03157	GO:0016509	long-chain-3-hydroxyacyl-CoA dehydrogenase activity	F	1
isotig03165	GO:0008483	transaminase activity	F	1
isotig03175	GO:0017151	DEAD/H-box RNA helicase binding	F	1
isotig03184	GO:0016791	phosphatase activity	F	1
isotig03227	GO:0046592	polyamine oxidase activity	F	1
isotig03230	GO:0004148	dihydrolipoyl dehydrogenase activity	F	1
isotig03248	GO:0003972	RNA ligase (ATP) activity	F	1
isotig03259	GO:0008047	enzyme activator activity	F	1
isotig03259	GO:0016531	copper chaperone activity	F	1
isotig03276	GO:0016805	dipeptidase activity	F	1
isotig03282	GO:0008080	N-acetyltransferase activity	F	1
isotig03285	GO:0080023	3R-hydroxyacyl-CoA dehydratase activity	F	1
isotig03292	GO:0003873	6-phosphofructo-2-kinase activity	F	1
isotig03296	GO:0008641	small protein activating enzyme activity	F	1
isotig03303	GO:0000257	nitrilase activity	F	1
isotig03303	GO:0047710	bis(5'-adenosyl)-triphosphatase activity	F	1
isotig03323	GO:0004028	3-chloroallyl aldehyde dehydrogenase activity	F	1
isotig03352	GO:0045309	protein phosphorylated amino acid binding	F	1
isotig03375	GO:0004820	glycine-tRNA ligase activity	F	1
isotig03397	GO:0004743	pyruvate kinase activity	F	1
isotig03397	GO:0030955	potassium ion binding	F	1
isotig03420	GO:0050291	sphingosine N-acyltransferase activity	F	1
isotig03437	GO:0003837	beta-ureidopropionase activity	F	1
isotig03445	GO:0005096	GTPase activator activity	F	1
isotig03486	GO:0032934	sterol binding	F	1
isotig03490	GO:0004576	oligosaccharyl transferase activity	F	1
isotig03545	GO:0004174	electron-transferring-flavoprotein dehydrogenase activity	F	1
isotig03545	GO:0048039	ubiquinone binding	F	1
isotig03617	GO:0030169	low-density lipoprotein particle binding	F	1
isotig03654	GO:0018478	malonate-semialdehyde dehydrogenase (acetylating) activity	F	1
isotig03654	GO:0004491	methylmalonate-semialdehyde dehydrogenase (acylating) activity	F	1
isotig03693	GO:0042609	CD4 receptor binding	F	1
isotig03693	GO:0005154	epidermal growth factor receptor binding	F	1
isotig03693	GO:0001077	RNA polymerase II core promoter proximal region sequence-specific DNA binding transcription factor activity involved in positive regulation of transcription	F	1
isotig03693	GO:0017128	phospholipid scramblase activity	F	1
isotig03719	GO:0034056	estrogen response element binding	F	1
isotig03721	GO:0030165	PDZ domain binding	F	1
isotig03724	GO:0080130	L-phenylalanine:2-oxoglutarate aminotransferase activity	F	1
isotig03732	GO:0008139	nuclear localization sequence binding	F	1
isotig03732	GO:0034512	box C/D snoRNA binding	F	1
isotig03732	GO:0034513	box H/ACA snoRNA binding	F	1
isotig03744	GO:0033613	activating transcription factor binding	F	1
isotig03744	GO:0001085	RNA polymerase II transcription factor binding	F	1
isotig03755	GO:0008081	phosphoric diester hydrolase activity	F	1
isotig03755	GO:0004620	phospholipase activity	F	1
isotig03826	GO:0004556	alpha-amylase activity	F	1
isotig03858	GO:0016538	cyclin-dependent protein kinase regulator activity	F	1
isotig03927	GO:0004334	fumarylacetoacetase activity	F	1
isotig03945	GO:0033784	senecionine N-oxygenase activity	F	1
isotig03968	GO:0001032	RNA polymerase III type 3 promoter DNA binding	F	1
isotig03968	GO:0001031	RNA polymerase III type 2 promoter DNA binding	F	1
isotig03968	GO:0001156	TFIIIC-class transcription factor binding	F	1
isotig03968	GO:0001030	RNA polymerase III type 1 promoter DNA binding	F	1
isotig03999	GO:0004662	CAAX-protein geranylgeranyltransferase activity	F	1
isotig04007	GO:0008803	bis(5'-nucleosyl)-tetraphosphatase (symmetrical) activity	F	1
isotig04011	GO:0070742	C2H2 zinc finger domain binding	F	1
isotig04029	GO:0005542	folic acid binding	F	1
isotig04029	GO:0017174	glycine N-methyltransferase activity	F	1
isotig04037	GO:0003886	DNA (cytosine-5-)-methyltransferase activity	F	1
isotig04042	GO:0051371	muscle alpha-actinin binding	F	1
isotig04048	GO:0016760	cellulose synthase (UDP-forming) activity	F	1
isotig04090	GO:0042626	ATPase activity, coupled to transmembrane movement of substances	F	1
isotig04117	GO:0048763	calcium-induced calcium release activity	F	1
isotig04134	GO:0022892	substrate-specific transporter activity	F	1
isotig04154	GO:0035614	snRNA stem-loop binding	F	1
isotig04154	GO:0030619	U1 snRNA binding	F	1
isotig04154	GO:0030620	U2 snRNA binding	F	1
isotig04166	GO:0004020	adenylylsulfate kinase activity	F	1
isotig04166	GO:0004781	sulfate adenylyltransferase (ATP) activity	F	1
isotig04170	GO:0005080	protein kinase C binding	F	1
isotig04210	GO:0004719	protein-L-isoaspartate (D-aspartate) O-methyltransferase activity	F	1
isotig04213	GO:0036002	pre-mRNA binding	F	1
isotig04213	GO:0035198	miRNA binding	F	1
isotig04223	GO:0051864	histone demethylase activity (H3-K36 specific)	F	1
isotig04292	GO:0008903	hydroxypyruvate isomerase activity	F	1
isotig04386	GO:0051903	S-(hydroxymethyl)glutathione dehydrogenase activity	F	1
isotig04386	GO:0004022	alcohol dehydrogenase (NAD) activity	F	1
isotig04419	GO:0019902	phosphatase binding	F	1
isotig00086	GO:0005326	neurotransmitter transporter activity	F	2
isotig00382	GO:0004784	superoxide dismutase activity	F	2
isotig00408	GO:0008017	microtubule binding	F	2
isotig00430	GO:0048029	monosaccharide binding	F	2
isotig00430	GO:0004802	transketolase activity	F	2
isotig00452	GO:0004867	serine-type endopeptidase inhibitor activity	F	2
isotig00600	GO:0005326	neurotransmitter transporter activity	F	2
isotig00616	GO:0016594	glycine binding	F	2
isotig00695	GO:0030020	extracellular matrix structural constituent conferring tensile strength	F	2
isotig00696	GO:0002020	protease binding	F	2
isotig00716	GO:0043621	protein self-association	F	2
isotig00718	GO:0016741	transferase activity, transferring one-carbon groups	F	2
isotig00761	GO:0005215	transporter activity	F	2
isotig00801	GO:0004450	isocitrate dehydrogenase (NADP+) activity	F	2
isotig00803	GO:0004553	hydrolase activity, hydrolyzing O-glycosyl compounds	F	2
isotig00823	GO:0010181	FMN binding	F	2
isotig00834	GO:0004450	isocitrate dehydrogenase (NADP+) activity	F	2
isotig00878	GO:0005388	calcium-transporting ATPase activity	F	2
isotig00890	GO:0016831	carboxy-lyase activity	F	2
isotig00914	GO:0008475	procollagen-lysine 5-dioxygenase activity	F	2
isotig00914	GO:0033823	procollagen glucosyltransferase activity	F	2
isotig00918	GO:0004470	malic enzyme activity	F	2
isotig00919	GO:0003697	single-stranded DNA binding	F	2
isotig00935	GO:0008475	procollagen-lysine 5-dioxygenase activity	F	2
isotig00935	GO:0033823	procollagen glucosyltransferase activity	F	2
isotig00937	GO:0042277	peptide binding	F	2
isotig00975	GO:0043021	ribonucleoprotein complex binding	F	2
isotig00982	GO:0015095	magnesium ion transmembrane transporter activity	F	2
isotig01023	GO:0003906	DNA-(apurinic or apyrimidinic site) lyase activity	F	2
isotig01041	GO:0008235	metalloexopeptidase activity	F	2
isotig01052	GO:0003697	single-stranded DNA binding	F	2
isotig01056	GO:0003985	acetyl-CoA C-acetyltransferase activity	F	2
isotig01080	GO:0004459	L-lactate dehydrogenase activity	F	2
isotig01087	GO:0034437	glycoprotein transporter activity	F	2
isotig01087	GO:0005548	phospholipid transporter activity	F	2
isotig01087	GO:0043531	ADP binding	F	2
isotig01087	GO:0034041	sterol-transporting ATPase activity	F	2
isotig01087	GO:0019534	toxin transporter activity	F	2
isotig01137	GO:0008097	5S rRNA binding	F	2
isotig01141	GO:0042393	histone binding	F	2
isotig01144	GO:0016881	acid-amino acid ligase activity	F	2
isotig01160	GO:0004470	malic enzyme activity	F	2
isotig01174	GO:0032036	myosin heavy chain binding	F	2
isotig01212	GO:0048037	cofactor binding	F	2
isotig01245	GO:0001106	RNA polymerase II transcription corepressor activity	F	2
isotig01245	GO:0000977	RNA polymerase II regulatory region sequence-specific DNA binding	F	2
isotig01247	GO:0000049	tRNA binding	F	2
isotig01308	GO:0008238	exopeptidase activity	F	2
isotig01327	GO:0050327	testosterone 17-beta-dehydrogenase (NAD+) activity	F	2
isotig01327	GO:0003857	3-hydroxyacyl-CoA dehydrogenase activity	F	2
isotig01327	GO:0004303	estradiol 17-beta-dehydrogenase activity	F	2
isotig01339	GO:0034437	glycoprotein transporter activity	F	2
isotig01339	GO:0005548	phospholipid transporter activity	F	2
isotig01339	GO:0043531	ADP binding	F	2
isotig01339	GO:0034041	sterol-transporting ATPase activity	F	2
isotig01339	GO:0019534	toxin transporter activity	F	2
isotig01421	GO:0004519	endonuclease activity	F	2
isotig01431	GO:0008312	7S RNA binding	F	2
isotig01482	GO:0004021	L-alanine:2-oxoglutarate aminotransferase activity	F	2
isotig01499	GO:0016881	acid-amino acid ligase activity	F	2
isotig01500	GO:0005507	copper ion binding	F	2
isotig01522	GO:0048029	monosaccharide binding	F	2
isotig01550	GO:0004784	superoxide dismutase activity	F	2
isotig01567	GO:0030276	clathrin binding	F	2
isotig01598	GO:0032036	myosin heavy chain binding	F	2
isotig01600	GO:0004775	succinate-CoA ligase (ADP-forming) activity	F	2
isotig01600	GO:0048037	cofactor binding	F	2
isotig01619	GO:0016702	oxidoreductase activity, acting on single donors with incorporation of molecular oxygen, incorporation of two atoms of oxygen	F	2
isotig01625	GO:0016209	antioxidant activity	F	2
isotig01626	GO:0016209	antioxidant activity	F	2
isotig01634	GO:0004035	alkaline phosphatase activity	F	2
isotig01702	GO:0003863	3-methyl-2-oxobutanoate dehydrogenase (2-methylpropanoyl-transferring) activity	F	2
isotig01702	GO:0016831	carboxy-lyase activity	F	2
isotig01760	GO:0016820	hydrolase activity, acting on acid anhydrides, catalyzing transmembrane movement of substances	F	2
isotig01781	GO:0044212	transcription regulatory region DNA binding	F	2
isotig01785	GO:0005178	integrin binding	F	2
isotig01791	GO:0019788	NEDD8 ligase activity	F	2
isotig01792	GO:0008026	ATP-dependent helicase activity	F	2
isotig01816	GO:0015293	symporter activity	F	2
isotig01817	GO:0016820	hydrolase activity, acting on acid anhydrides, catalyzing transmembrane movement of substances	F	2
isotig01821	GO:0070011	peptidase activity, acting on L-amino acid peptides	F	2
isotig01843	GO:0015574	trehalose transmembrane transporter activity	F	2
isotig01848	GO:0008235	metalloexopeptidase activity	F	2
isotig01910	GO:0004775	succinate-CoA ligase (ADP-forming) activity	F	2
isotig01935	GO:0003863	3-methyl-2-oxobutanoate dehydrogenase (2-methylpropanoyl-transferring) activity	F	2
isotig01967	GO:0015035	protein disulfide oxidoreductase activity	F	2
isotig01981	GO:0005388	calcium-transporting ATPase activity	F	2
isotig01988	GO:0017124	SH3 domain binding	F	2
isotig01988	GO:0005178	integrin binding	F	2
isotig02031	GO:0004021	L-alanine:2-oxoglutarate aminotransferase activity	F	2
isotig02093	GO:0015095	magnesium ion transmembrane transporter activity	F	2
isotig02109	GO:0003954	NADH dehydrogenase activity	F	2
isotig02113	GO:0004867	serine-type endopeptidase inhibitor activity	F	2
isotig02116	GO:0004802	transketolase activity	F	2
isotig02124	GO:0030020	extracellular matrix structural constituent conferring tensile strength	F	2
isotig02151	GO:0010181	FMN binding	F	2
isotig02201	GO:0016757	transferase activity, transferring glycosyl groups	F	2
isotig02208	GO:0000049	tRNA binding	F	2
isotig02217	GO:0016746	transferase activity, transferring acyl groups	F	2
isotig02233	GO:0004497	monooxygenase activity	F	2
isotig02239	GO:0070011	peptidase activity, acting on L-amino acid peptides	F	2
isotig02263	GO:0008121	ubiquinol-cytochrome-c reductase activity	F	2
isotig02333	GO:0004553	hydrolase activity, hydrolyzing O-glycosyl compounds	F	2
isotig02341	GO:0015035	protein disulfide oxidoreductase activity	F	2
isotig02410	GO:0003988	acetyl-CoA C-acyltransferase activity	F	2
isotig02450	GO:0015293	symporter activity	F	2
isotig02497	GO:0004035	alkaline phosphatase activity	F	2
isotig02584	GO:0005047	signal recognition particle binding	F	2
isotig02586	GO:0004563	beta-N-acetylhexosaminidase activity	F	2
isotig02632	GO:0016702	oxidoreductase activity, acting on single donors with incorporation of molecular oxygen, incorporation of two atoms of oxygen	F	2
isotig02662	GO:0008144	drug binding	F	2
isotig02662	GO:0008312	7S RNA binding	F	2
isotig02662	GO:0043021	ribonucleoprotein complex binding	F	2
isotig02679	GO:0001106	RNA polymerase II transcription corepressor activity	F	2
isotig02679	GO:0000977	RNA polymerase II regulatory region sequence-specific DNA binding	F	2
isotig02740	GO:0005215	transporter activity	F	2
isotig02741	GO:0008097	5S rRNA binding	F	2
isotig02760	GO:0042277	peptide binding	F	2
isotig02786	GO:0004459	L-lactate dehydrogenase activity	F	2
isotig02828	GO:0008026	ATP-dependent helicase activity	F	2
isotig02832	GO:0008238	exopeptidase activity	F	2
isotig02832	GO:0008237	metallopeptidase activity	F	2
isotig02866	GO:0008017	microtubule binding	F	2
isotig02866	GO:0004660	protein farnesyltransferase activity	F	2
isotig02988	GO:0005516	calmodulin binding	F	2
isotig03010	GO:0003906	DNA-(apurinic or apyrimidinic site) lyase activity	F	2
isotig03047	GO:0008144	drug binding	F	2
isotig03054	GO:0005047	signal recognition particle binding	F	2
isotig03111	GO:0016741	transferase activity, transferring one-carbon groups	F	2
isotig03157	GO:0003988	acetyl-CoA C-acyltransferase activity	F	2
isotig03157	GO:0003857	3-hydroxyacyl-CoA dehydrogenase activity	F	2
isotig03177	GO:0016746	transferase activity, transferring acyl groups	F	2
isotig03192	GO:0003954	NADH dehydrogenase activity	F	2
isotig03353	GO:0008320	protein transmembrane transporter activity	F	2
isotig03391	GO:0008237	metallopeptidase activity	F	2
isotig03427	GO:0042393	histone binding	F	2
isotig03427	GO:0044212	transcription regulatory region DNA binding	F	2
isotig03444	GO:0015574	trehalose transmembrane transporter activity	F	2
isotig03454	GO:0004563	beta-N-acetylhexosaminidase activity	F	2
isotig03488	GO:0004519	endonuclease activity	F	2
isotig03496	GO:0004849	uridine kinase activity	F	2
isotig03496	GO:0016773	phosphotransferase activity, alcohol group as acceptor	F	2
isotig03546	GO:0008121	ubiquinol-cytochrome-c reductase activity	F	2
isotig03644	GO:0030414	peptidase inhibitor activity	F	2
isotig03661	GO:0050327	testosterone 17-beta-dehydrogenase (NAD+) activity	F	2
isotig03661	GO:0004303	estradiol 17-beta-dehydrogenase activity	F	2
isotig03671	GO:0004069	L-aspartate:2-oxoglutarate aminotransferase activity	F	2
isotig03693	GO:0017124	SH3 domain binding	F	2
isotig03719	GO:0051219	phosphoprotein binding	F	2
isotig03724	GO:0004069	L-aspartate:2-oxoglutarate aminotransferase activity	F	2
isotig03902	GO:0004849	uridine kinase activity	F	2
isotig03902	GO:0016773	phosphotransferase activity, alcohol group as acceptor	F	2
isotig03968	GO:0051219	phosphoprotein binding	F	2
isotig03999	GO:0004660	protein farnesyltransferase activity	F	2
isotig04012	GO:0005507	copper ion binding	F	2
isotig04012	GO:0019788	NEDD8 ligase activity	F	2
isotig04026	GO:0030414	peptidase inhibitor activity	F	2
isotig04029	GO:0016594	glycine binding	F	2
isotig04042	GO:0043621	protein self-association	F	2
isotig04042	GO:0002020	protease binding	F	2
isotig04042	GO:0005516	calmodulin binding	F	2
isotig04058	GO:0016757	transferase activity, transferring glycosyl groups	F	2
isotig04074	GO:0008320	protein transmembrane transporter activity	F	2
isotig04124	GO:0030276	clathrin binding	F	2
isotig04137	GO:0003985	acetyl-CoA C-acetyltransferase activity	F	2
isotig04260	GO:0004497	monooxygenase activity	F	2
isotig00135	GO:0005200	structural constituent of cytoskeleton	F	3
isotig00140	GO:0005200	structural constituent of cytoskeleton	F	3
isotig00142	GO:0017105	acyl-CoA delta11-desaturase activity	F	3
isotig00145	GO:0019899	enzyme binding	F	3
isotig00308	GO:0019900	kinase binding	F	3
isotig00322	GO:0008307	structural constituent of muscle	F	3
isotig00709	GO:0008307	structural constituent of muscle	F	3
isotig00738	GO:0017105	acyl-CoA delta11-desaturase activity	F	3
isotig00767	GO:0016620	oxidoreductase activity, acting on the aldehyde or oxo group of donors, NAD or NADP as acceptor	F	3
isotig00788	GO:0031369	translation initiation factor binding	F	3
isotig00805	GO:0004587	ornithine-oxo-acid transaminase activity	F	3
isotig00806	GO:0016627	oxidoreductase activity, acting on the CH-CH group of donors	F	3
isotig00870	GO:0008234	cysteine-type peptidase activity	F	3
isotig00882	GO:0019900	kinase binding	F	3
isotig00916	GO:0050662	coenzyme binding	F	3
isotig00919	GO:0003727	single-stranded RNA binding	F	3
isotig00938	GO:0016627	oxidoreductase activity, acting on the CH-CH group of donors	F	3
isotig00947	GO:0070491	repressing transcription factor binding	F	3
isotig01041	GO:0004177	aminopeptidase activity	F	3
isotig01052	GO:0003690	double-stranded DNA binding	F	3
isotig01084	GO:0004222	metalloendopeptidase activity	F	3
isotig01087	GO:0017127	cholesterol transporter activity	F	3
isotig01112	GO:0004587	ornithine-oxo-acid transaminase activity	F	3
isotig01149	GO:0017105	acyl-CoA delta11-desaturase activity	F	3
isotig01175	GO:0005543	phospholipid binding	F	3
isotig01245	GO:0070491	repressing transcription factor binding	F	3
isotig01278	GO:0003727	single-stranded RNA binding	F	3
isotig01281	GO:0005243	gap junction channel activity	F	3
isotig01339	GO:0017127	cholesterol transporter activity	F	3
isotig01344	GO:0005243	gap junction channel activity	F	3
isotig01416	GO:0004872	receptor activity	F	3
isotig01453	GO:0004601	peroxidase activity	F	3
isotig01713	GO:0019900	kinase binding	F	3
isotig01722	GO:0031625	ubiquitin protein ligase binding	F	3
isotig01758	GO:0003690	double-stranded DNA binding	F	3
isotig01785	GO:0008013	beta-catenin binding	F	3
isotig01799	GO:0030234	enzyme regulator activity	F	3
isotig01807	GO:0004579	dolichyl-diphosphooligosaccharide-protein glycotransferase activity	F	3
isotig01830	GO:0031369	translation initiation factor binding	F	3
isotig01848	GO:0030145	manganese ion binding	F	3
isotig01848	GO:0004177	aminopeptidase activity	F	3
isotig01900	GO:0051087	chaperone binding	F	3
isotig01967	GO:0003756	protein disulfide isomerase activity	F	3
isotig02003	GO:0031625	ubiquitin protein ligase binding	F	3
isotig02094	GO:0004579	dolichyl-diphosphooligosaccharide-protein glycotransferase activity	F	3
isotig02113	GO:0004222	metalloendopeptidase activity	F	3
isotig02126	GO:0019003	GDP binding	F	3
isotig02142	GO:0008234	cysteine-type peptidase activity	F	3
isotig02238	GO:0004872	receptor activity	F	3
isotig02331	GO:0004579	dolichyl-diphosphooligosaccharide-protein glycotransferase activity	F	3
isotig02337	GO:0051087	chaperone binding	F	3
isotig02341	GO:0003756	protein disulfide isomerase activity	F	3
isotig02365	GO:0016829	lyase activity	F	3
isotig02377	GO:0004587	ornithine-oxo-acid transaminase activity	F	3
isotig02415	GO:0004872	receptor activity	F	3
isotig02466	GO:0016829	lyase activity	F	3
isotig02472	GO:0004601	peroxidase activity	F	3
isotig02515	GO:0003690	double-stranded DNA binding	F	3
isotig02571	GO:0031369	translation initiation factor binding	F	3
isotig02630	GO:0008234	cysteine-type peptidase activity	F	3
isotig02662	GO:0019003	GDP binding	F	3
isotig02679	GO:0070491	repressing transcription factor binding	F	3
isotig02680	GO:0000062	fatty-acyl-CoA binding	F	3
isotig02685	GO:0003714	transcription corepressor activity	F	3
isotig02713	GO:0050662	coenzyme binding	F	3
isotig02723	GO:0030234	enzyme regulator activity	F	3
isotig02740	GO:0051087	chaperone binding	F	3
isotig02773	GO:0031072	heat shock protein binding	F	3
isotig02879	GO:0030145	manganese ion binding	F	3
isotig02888	GO:0005243	gap junction channel activity	F	3
isotig02891	GO:0005200	structural constituent of cytoskeleton	F	3
isotig02903	GO:0030234	enzyme regulator activity	F	3
isotig02927	GO:0004222	metalloendopeptidase activity	F	3
isotig02973	GO:0015279	store-operated calcium channel activity	F	3
isotig03021	GO:0031072	heat shock protein binding	F	3
isotig03075	GO:0004756	selenide, water dikinase activity	F	3
isotig03103	GO:0016620	oxidoreductase activity, acting on the aldehyde or oxo group of donors, NAD or NADP as acceptor	F	3
isotig03121	GO:0017127	cholesterol transporter activity	F	3
isotig03157	GO:0000062	fatty-acyl-CoA binding	F	3
isotig03157	GO:0004300	enoyl-CoA hydratase activity	F	3
isotig03220	GO:0004601	peroxidase activity	F	3
isotig03237	GO:0004756	selenide, water dikinase activity	F	3
isotig03263	GO:0004756	selenide, water dikinase activity	F	3
isotig03285	GO:0004300	enoyl-CoA hydratase activity	F	3
isotig03297	GO:0008191	metalloendopeptidase inhibitor activity	F	3
isotig03352	GO:0008013	beta-catenin binding	F	3
isotig03399	GO:0016829	lyase activity	F	3
isotig03426	GO:0015279	store-operated calcium channel activity	F	3
isotig03427	GO:0003714	transcription corepressor activity	F	3
isotig03427	GO:0047485	protein N-terminus binding	F	3
isotig03427	GO:0008013	beta-catenin binding	F	3
isotig03428	GO:0019003	GDP binding	F	3
isotig03491	GO:0047485	protein N-terminus binding	F	3
isotig03512	GO:0008191	metalloendopeptidase inhibitor activity	F	3
isotig03564	GO:0031625	ubiquitin protein ligase binding	F	3
isotig03571	GO:0004300	enoyl-CoA hydratase activity	F	3
isotig03654	GO:0000062	fatty-acyl-CoA binding	F	3
isotig03693	GO:0019899	enzyme binding	F	3
isotig03694	GO:0003756	protein disulfide isomerase activity	F	3
isotig03710	GO:0030145	manganese ion binding	F	3
isotig03710	GO:0004177	aminopeptidase activity	F	3
isotig03748	GO:0016627	oxidoreductase activity, acting on the CH-CH group of donors	F	3
isotig03757	GO:0016620	oxidoreductase activity, acting on the aldehyde or oxo group of donors, NAD or NADP as acceptor	F	3
isotig03761	GO:0008191	metalloendopeptidase inhibitor activity	F	3
isotig03963	GO:0005543	phospholipid binding	F	3
isotig03981	GO:0031072	heat shock protein binding	F	3
isotig04011	GO:0047485	protein N-terminus binding	F	3
isotig04042	GO:0008307	structural constituent of muscle	F	3
isotig04117	GO:0015279	store-operated calcium channel activity	F	3
isotig04137	GO:0019899	enzyme binding	F	3
isotig04137	GO:0050662	coenzyme binding	F	3
isotig04286	GO:0005543	phospholipid binding	F	3
isotig04306	GO:0003714	transcription corepressor activity	F	3
isotig04446	GO:0003727	single-stranded RNA binding	F	3
isotig00338	GO:0004503	monophenol monooxygenase activity	F	4
isotig00342	GO:0016616	oxidoreductase activity, acting on the CH-OH group of donors, NAD or NADP as acceptor	F	4
isotig00412	GO:0005506	iron ion binding	F	4
isotig00424	GO:0008745	N-acetylmuramoyl-L-alanine amidase activity	F	4
isotig00709	GO:0003774	motor activity	F	4
isotig00716	GO:0008143	poly(A) RNA binding	F	4
isotig00721	GO:0042623	ATPase activity, coupled	F	4
isotig00726	GO:0008553	hydrogen-exporting ATPase activity, phosphorylative mechanism	F	4
isotig00727	GO:0004503	monophenol monooxygenase activity	F	4
isotig00736	GO:0005506	iron ion binding	F	4
isotig00778	GO:0004029	aldehyde dehydrogenase (NAD) activity	F	4
isotig00791	GO:0004029	aldehyde dehydrogenase (NAD) activity	F	4
isotig00802	GO:0004129	cytochrome-c oxidase activity	F	4
isotig00834	GO:0050661	NADP binding	F	4
isotig00855	GO:0004029	aldehyde dehydrogenase (NAD) activity	F	4
isotig00919	GO:0000900	translation repressor activity, nucleic acid binding	F	4
isotig00930	GO:0004175	endopeptidase activity	F	4
isotig00931	GO:0050661	NADP binding	F	4
isotig00937	GO:0003755	peptidyl-prolyl cis-trans isomerase activity	F	4
isotig00947	GO:0030674	protein binding, bridging	F	4
isotig00960	GO:0003730	mRNA 3'-UTR binding	F	4
isotig01052	GO:0000900	translation repressor activity, nucleic acid binding	F	4
isotig01114	GO:0016874	ligase activity	F	4
isotig01125	GO:0003899	DNA-directed RNA polymerase activity	F	4
isotig01160	GO:0016616	oxidoreductase activity, acting on the CH-OH group of donors, NAD or NADP as acceptor	F	4
isotig01173	GO:0016616	oxidoreductase activity, acting on the CH-OH group of donors, NAD or NADP as acceptor	F	4
isotig01174	GO:0042623	ATPase activity, coupled	F	4
isotig01220	GO:0008022	protein C-terminus binding	F	4
isotig01245	GO:0030674	protein binding, bridging	F	4
isotig01251	GO:0016616	oxidoreductase activity, acting on the CH-OH group of donors, NAD or NADP as acceptor	F	4
isotig01267	GO:0004175	endopeptidase activity	F	4
isotig01500	GO:0004129	cytochrome-c oxidase activity	F	4
isotig01507	GO:0046933	hydrogen ion transporting ATP synthase activity, rotational mechanism	F	4
isotig01520	GO:0004129	cytochrome-c oxidase activity	F	4
isotig01527	GO:0008143	poly(A) RNA binding	F	4
isotig01548	GO:0003774	motor activity	F	4
isotig01598	GO:0042623	ATPase activity, coupled	F	4
isotig01615	GO:0003713	transcription coactivator activity	F	4
isotig01626	GO:0008022	protein C-terminus binding	F	4
isotig01634	GO:0004175	endopeptidase activity	F	4
isotig01671	GO:0003899	DNA-directed RNA polymerase activity	F	4
isotig01704	GO:0046933	hydrogen ion transporting ATP synthase activity, rotational mechanism	F	4
isotig01764	GO:0008745	N-acetylmuramoyl-L-alanine amidase activity	F	4
isotig01813	GO:0015450	P-P-bond-hydrolysis-driven protein transmembrane transporter activity	F	4
isotig01831	GO:0008143	poly(A) RNA binding	F	4
isotig01841	GO:0004129	cytochrome-c oxidase activity	F	4
isotig01867	GO:0008022	protein C-terminus binding	F	4
isotig01964	GO:0015450	P-P-bond-hydrolysis-driven protein transmembrane transporter activity	F	4
isotig02091	GO:0008553	hydrogen-exporting ATPase activity, phosphorylative mechanism	F	4
isotig02091	GO:0046933	hydrogen ion transporting ATP synthase activity, rotational mechanism	F	4
isotig02233	GO:0005506	iron ion binding	F	4
isotig02237	GO:0008745	N-acetylmuramoyl-L-alanine amidase activity	F	4
isotig02308	GO:0035091	phosphatidylinositol binding	F	4
isotig02330	GO:0008553	hydrogen-exporting ATPase activity, phosphorylative mechanism	F	4
isotig02386	GO:0003899	DNA-directed RNA polymerase activity	F	4
isotig02425	GO:0003713	transcription coactivator activity	F	4
isotig02434	GO:0046933	hydrogen ion transporting ATP synthase activity, rotational mechanism	F	4
isotig02438	GO:0001104	RNA polymerase II transcription cofactor activity	F	4
isotig02447	GO:0035091	phosphatidylinositol binding	F	4
isotig02472	GO:0050661	NADP binding	F	4
isotig02506	GO:0005506	iron ion binding	F	4
isotig02526	GO:0015450	P-P-bond-hydrolysis-driven protein transmembrane transporter activity	F	4
isotig02531	GO:0003774	motor activity	F	4
isotig02551	GO:0003755	peptidyl-prolyl cis-trans isomerase activity	F	4
isotig02566	GO:0008553	hydrogen-exporting ATPase activity, phosphorylative mechanism	F	4
isotig02588	GO:0008143	poly(A) RNA binding	F	4
isotig02601	GO:0035091	phosphatidylinositol binding	F	4
isotig02679	GO:0030674	protein binding, bridging	F	4
isotig02723	GO:0004175	endopeptidase activity	F	4
isotig02760	GO:0003755	peptidyl-prolyl cis-trans isomerase activity	F	4
isotig02774	GO:0000900	translation repressor activity, nucleic acid binding	F	4
isotig02774	GO:0003730	mRNA 3'-UTR binding	F	4
isotig02777	GO:0001104	RNA polymerase II transcription cofactor activity	F	4
isotig02797	GO:0003899	DNA-directed RNA polymerase activity	F	4
isotig02835	GO:0050661	NADP binding	F	4
isotig02939	GO:0003713	transcription coactivator activity	F	4
isotig02971	GO:0004503	monophenol monooxygenase activity	F	4
isotig02988	GO:0003713	transcription coactivator activity	F	4
isotig03174	GO:0016874	ligase activity	F	4
isotig03185	GO:0015450	P-P-bond-hydrolysis-driven protein transmembrane transporter activity	F	4
isotig03296	GO:0016874	ligase activity	F	4
isotig03323	GO:0004029	aldehyde dehydrogenase (NAD) activity	F	4
isotig03355	GO:0001104	RNA polymerase II transcription cofactor activity	F	4
isotig03534	GO:0003730	mRNA 3'-UTR binding	F	4
isotig03534	GO:0000900	translation repressor activity, nucleic acid binding	F	4
isotig03540	GO:0001104	RNA polymerase II transcription cofactor activity	F	4
isotig03552	GO:0003755	peptidyl-prolyl cis-trans isomerase activity	F	4
isotig03587	GO:0016874	ligase activity	F	4
isotig03626	GO:0003774	motor activity	F	4
isotig03820	GO:0008745	N-acetylmuramoyl-L-alanine amidase activity	F	4
isotig04122	GO:0035091	phosphatidylinositol binding	F	4
isotig04213	GO:0003730	mRNA 3'-UTR binding	F	4
isotig04239	GO:0030674	protein binding, bridging	F	4
isotig04268	GO:0042623	ATPase activity, coupled	F	4
isotig04268	GO:0008022	protein C-terminus binding	F	4
isotig04282	GO:0004503	monophenol monooxygenase activity	F	4
isotig00257	GO:0003746	translation elongation factor activity	F	5
isotig00388	GO:0046983	protein dimerization activity	F	5
isotig00552	GO:0004004	ATP-dependent RNA helicase activity	F	5
isotig00762	GO:0003746	translation elongation factor activity	F	5
isotig00793	GO:0003746	translation elongation factor activity	F	5
isotig00823	GO:0051539	4 iron, 4 sulfur cluster binding	F	5
isotig00830	GO:0030246	carbohydrate binding	F	5
isotig00848	GO:0016803	ether hydrolase activity	F	5
isotig01072	GO:0003746	translation elongation factor activity	F	5
isotig01125	GO:0004672	protein kinase activity	F	5
isotig01231	GO:0008092	cytoskeletal protein binding	F	5
isotig01245	GO:0051015	actin filament binding	F	5
isotig01332	GO:0046983	protein dimerization activity	F	5
isotig01489	GO:0046983	protein dimerization activity	F	5
isotig01519	GO:0008092	cytoskeletal protein binding	F	5
isotig01527	GO:0004004	ATP-dependent RNA helicase activity	F	5
isotig01548	GO:0008092	cytoskeletal protein binding	F	5
isotig01551	GO:0016803	ether hydrolase activity	F	5
isotig01692	GO:0051015	actin filament binding	F	5
isotig01717	GO:0030246	carbohydrate binding	F	5
isotig01725	GO:0004004	ATP-dependent RNA helicase activity	F	5
isotig01730	GO:0004672	protein kinase activity	F	5
isotig01773	GO:0004672	protein kinase activity	F	5
isotig01831	GO:0004004	ATP-dependent RNA helicase activity	F	5
isotig01955	GO:0016803	ether hydrolase activity	F	5
isotig01973	GO:0004672	protein kinase activity	F	5
isotig02008	GO:0030246	carbohydrate binding	F	5
isotig02235	GO:0030246	carbohydrate binding	F	5
isotig02239	GO:0016803	ether hydrolase activity	F	5
isotig02374	GO:0030246	carbohydrate binding	F	5
isotig02506	GO:0051539	4 iron, 4 sulfur cluster binding	F	5
isotig02565	GO:0051015	actin filament binding	F	5
isotig02679	GO:0051015	actin filament binding	F	5
isotig02774	GO:0004672	protein kinase activity	F	5
isotig02940	GO:0016803	ether hydrolase activity	F	5
isotig03052	GO:0004004	ATP-dependent RNA helicase activity	F	5
isotig03154	GO:0008092	cytoskeletal protein binding	F	5
isotig03279	GO:0003746	translation elongation factor activity	F	5
isotig03352	GO:0046983	protein dimerization activity	F	5
isotig03375	GO:0046983	protein dimerization activity	F	5
isotig03545	GO:0051539	4 iron, 4 sulfur cluster binding	F	5
isotig03718	GO:0051539	4 iron, 4 sulfur cluster binding	F	5
isotig03721	GO:0008092	cytoskeletal protein binding	F	5
isotig03784	GO:0051539	4 iron, 4 sulfur cluster binding	F	5
isotig04042	GO:0051015	actin filament binding	F	5
isotig00296	GO:0017111	nucleoside-triphosphatase activity	F	6
isotig00356	GO:0008236	serine-type peptidase activity	F	6
isotig00418	GO:0008565	protein transporter activity	F	6
isotig00802	GO:0020037	heme binding	F	6
isotig00868	GO:0052689	carboxylic ester hydrolase activity	F	6
isotig00947	GO:0003682	chromatin binding	F	6
isotig00993	GO:0046961	proton-transporting ATPase activity, rotational mechanism	F	6
isotig01047	GO:0046961	proton-transporting ATPase activity, rotational mechanism	F	6
isotig01067	GO:0017111	nucleoside-triphosphatase activity	F	6
isotig01087	GO:0046982	protein heterodimerization activity	F	6
isotig01102	GO:0017111	nucleoside-triphosphatase activity	F	6
isotig01156	GO:0052689	carboxylic ester hydrolase activity	F	6
isotig01339	GO:0046982	protein heterodimerization activity	F	6
isotig01413	GO:0017111	nucleoside-triphosphatase activity	F	6
isotig01500	GO:0020037	heme binding	F	6
isotig01507	GO:0046961	proton-transporting ATPase activity, rotational mechanism	F	6
isotig01552	GO:0008565	protein transporter activity	F	6
isotig01574	GO:0003682	chromatin binding	F	6
isotig01704	GO:0046961	proton-transporting ATPase activity, rotational mechanism	F	6
isotig01755	GO:0020037	heme binding	F	6
isotig01776	GO:0008236	serine-type peptidase activity	F	6
isotig01911	GO:0052689	carboxylic ester hydrolase activity	F	6
isotig01969	GO:0008236	serine-type peptidase activity	F	6
isotig02057	GO:0008236	serine-type peptidase activity	F	6
isotig02091	GO:0046961	proton-transporting ATPase activity, rotational mechanism	F	6
isotig02100	GO:0052689	carboxylic ester hydrolase activity	F	6
isotig02434	GO:0046961	proton-transporting ATPase activity, rotational mechanism	F	6
isotig02472	GO:0020037	heme binding	F	6
isotig02523	GO:0008236	serine-type peptidase activity	F	6
isotig02544	GO:0008565	protein transporter activity	F	6
isotig02637	GO:0008565	protein transporter activity	F	6
isotig02805	GO:0046982	protein heterodimerization activity	F	6
isotig02939	GO:0003682	chromatin binding	F	6
isotig03121	GO:0046982	protein heterodimerization activity	F	6
isotig03145	GO:0046982	protein heterodimerization activity	F	6
isotig03220	GO:0020037	heme binding	F	6
isotig03276	GO:0008236	serine-type peptidase activity	F	6
isotig03367	GO:0052689	carboxylic ester hydrolase activity	F	6
isotig03428	GO:0046982	protein heterodimerization activity	F	6
isotig03497	GO:0003682	chromatin binding	F	6
isotig03541	GO:0017111	nucleoside-triphosphatase activity	F	6
isotig03719	GO:0003682	chromatin binding	F	6
isotig03726	GO:0052689	carboxylic ester hydrolase activity	F	6
isotig03854	GO:0020037	heme binding	F	6
isotig04013	GO:0008565	protein transporter activity	F	6
isotig04056	GO:0017111	nucleoside-triphosphatase activity	F	6
isotig04161	GO:0008565	protein transporter activity	F	6
isotig04223	GO:0003682	chromatin binding	F	6
isotig00207	GO:0050660	flavin adenine dinucleotide binding	F	7
isotig00430	GO:0000287	magnesium ion binding	F	7
isotig00682	GO:0005102	receptor binding	F	7
isotig00788	GO:0043022	ribosome binding	F	7
isotig00801	GO:0000287	magnesium ion binding	F	7
isotig00805	GO:0030170	pyridoxal phosphate binding	F	7
isotig00834	GO:0005102	receptor binding	F	7
isotig00834	GO:0000287	magnesium ion binding	F	7
isotig01005	GO:0050660	flavin adenine dinucleotide binding	F	7
isotig01021	GO:0004674	protein serine/threonine kinase activity	F	7
isotig01072	GO:0043022	ribosome binding	F	7
isotig01112	GO:0030170	pyridoxal phosphate binding	F	7
isotig01169	GO:0050660	flavin adenine dinucleotide binding	F	7
isotig01220	GO:0005102	receptor binding	F	7
isotig01256	GO:0015078	hydrogen ion transmembrane transporter activity	F	7
isotig01461	GO:0015078	hydrogen ion transmembrane transporter activity	F	7
isotig01553	GO:0043022	ribosome binding	F	7
isotig01556	GO:0000287	magnesium ion binding	F	7
isotig01754	GO:0030170	pyridoxal phosphate binding	F	7
isotig01830	GO:0043022	ribosome binding	F	7
isotig01988	GO:0004674	protein serine/threonine kinase activity	F	7
isotig02022	GO:0030170	pyridoxal phosphate binding	F	7
isotig02035	GO:0015078	hydrogen ion transmembrane transporter activity	F	7
isotig02047	GO:0015078	hydrogen ion transmembrane transporter activity	F	7
isotig02115	GO:0005102	receptor binding	F	7
isotig02115	GO:0030170	pyridoxal phosphate binding	F	7
isotig02135	GO:0000287	magnesium ion binding	F	7
isotig02151	GO:0005102	receptor binding	F	7
isotig02377	GO:0030170	pyridoxal phosphate binding	F	7
isotig02450	GO:0015078	hydrogen ion transmembrane transporter activity	F	7
isotig02497	GO:0000287	magnesium ion binding	F	7
isotig02522	GO:0005102	receptor binding	F	7
isotig02534	GO:0005102	receptor binding	F	7
isotig02571	GO:0043022	ribosome binding	F	7
isotig02835	GO:0050660	flavin adenine dinucleotide binding	F	7
isotig03147	GO:0004674	protein serine/threonine kinase activity	F	7
isotig03227	GO:0050660	flavin adenine dinucleotide binding	F	7
isotig03230	GO:0050660	flavin adenine dinucleotide binding	F	7
isotig03258	GO:0015078	hydrogen ion transmembrane transporter activity	F	7
isotig03380	GO:0004674	protein serine/threonine kinase activity	F	7
isotig03397	GO:0000287	magnesium ion binding	F	7
isotig03558	GO:0015078	hydrogen ion transmembrane transporter activity	F	7
isotig03724	GO:0030170	pyridoxal phosphate binding	F	7
isotig03945	GO:0050660	flavin adenine dinucleotide binding	F	7
isotig03968	GO:0004674	protein serine/threonine kinase activity	F	7
isotig03968	GO:0043022	ribosome binding	F	7
isotig04042	GO:0004674	protein serine/threonine kinase activity	F	7
isotig04314	GO:0004674	protein serine/threonine kinase activity	F	7
isotig04358	GO:0043022	ribosome binding	F	7
isotig00308	GO:0004252	serine-type endopeptidase activity	F	8
isotig00388	GO:0043565	sequence-specific DNA binding	F	8
isotig00412	GO:0051536	iron-sulfur cluster binding	F	8
isotig00544	GO:0051536	iron-sulfur cluster binding	F	8
isotig00714	GO:0043565	sequence-specific DNA binding	F	8
isotig00775	GO:0005198	structural molecule activity	F	8
isotig00780	GO:0008134	transcription factor binding	F	8
isotig00789	GO:0043565	sequence-specific DNA binding	F	8
isotig00801	GO:0051287	NAD binding	F	8
isotig00823	GO:0051287	NAD binding	F	8
isotig00823	GO:0008137	NADH dehydrogenase (ubiquinone) activity	F	8
isotig00829	GO:0005198	structural molecule activity	F	8
isotig00834	GO:0051287	NAD binding	F	8
isotig00988	GO:0008137	NADH dehydrogenase (ubiquinone) activity	F	8
isotig01052	GO:0008134	transcription factor binding	F	8
isotig01121	GO:0019901	protein kinase binding	F	8
isotig01126	GO:0019843	rRNA binding	F	8
isotig01203	GO:0016887	ATPase activity	F	8
isotig01218	GO:0019843	rRNA binding	F	8
isotig01250	GO:0008134	transcription factor binding	F	8
isotig01261	GO:0008137	NADH dehydrogenase (ubiquinone) activity	F	8
isotig01277	GO:0005198	structural molecule activity	F	8
isotig01318	GO:0019843	rRNA binding	F	8
isotig01332	GO:0043565	sequence-specific DNA binding	F	8
isotig01363	GO:0051287	NAD binding	F	8
isotig01363	GO:0008137	NADH dehydrogenase (ubiquinone) activity	F	8
isotig01487	GO:0004252	serine-type endopeptidase activity	F	8
isotig01517	GO:0016887	ATPase activity	F	8
isotig01517	GO:0051536	iron-sulfur cluster binding	F	8
isotig01524	GO:0004871	signal transducer activity	F	8
isotig01626	GO:0019901	protein kinase binding	F	8
isotig01672	GO:0004252	serine-type endopeptidase activity	F	8
isotig01702	GO:0032403	protein complex binding	F	8
isotig01711	GO:0004871	signal transducer activity	F	8
isotig01717	GO:0051287	NAD binding	F	8
isotig01722	GO:0032403	protein complex binding	F	8
isotig01758	GO:0043565	sequence-specific DNA binding	F	8
isotig01785	GO:0019901	protein kinase binding	F	8
isotig01913	GO:0019843	rRNA binding	F	8
isotig01943	GO:0016887	ATPase activity	F	8
isotig01943	GO:0051536	iron-sulfur cluster binding	F	8
isotig01979	GO:0004252	serine-type endopeptidase activity	F	8
isotig01988	GO:0004871	signal transducer activity	F	8
isotig01988	GO:0019901	protein kinase binding	F	8
isotig02037	GO:0008134	transcription factor binding	F	8
isotig02047	GO:0032403	protein complex binding	F	8
isotig02047	GO:0016887	ATPase activity	F	8
isotig02068	GO:0051287	NAD binding	F	8
isotig02109	GO:0051536	iron-sulfur cluster binding	F	8
isotig02206	GO:0019901	protein kinase binding	F	8
isotig02218	GO:0008137	NADH dehydrogenase (ubiquinone) activity	F	8
isotig02335	GO:0019843	rRNA binding	F	8
isotig02340	GO:0016887	ATPase activity	F	8
isotig02421	GO:0019901	protein kinase binding	F	8
isotig02487	GO:0004871	signal transducer activity	F	8
isotig02515	GO:0004871	signal transducer activity	F	8
isotig02553	GO:0004871	signal transducer activity	F	8
isotig02594	GO:0004252	serine-type endopeptidase activity	F	8
isotig02605	GO:0019843	rRNA binding	F	8
isotig02635	GO:0019901	protein kinase binding	F	8
isotig02724	GO:0004871	signal transducer activity	F	8
isotig02906	GO:0032403	protein complex binding	F	8
isotig02907	GO:0043565	sequence-specific DNA binding	F	8
isotig02907	GO:0008134	transcription factor binding	F	8
isotig02973	GO:0004252	serine-type endopeptidase activity	F	8
isotig02988	GO:0043565	sequence-specific DNA binding	F	8
isotig02991	GO:0005198	structural molecule activity	F	8
isotig03087	GO:0032403	protein complex binding	F	8
isotig03157	GO:0051287	NAD binding	F	8
isotig03157	GO:0032403	protein complex binding	F	8
isotig03168	GO:0043565	sequence-specific DNA binding	F	8
isotig03275	GO:0019843	rRNA binding	F	8
isotig03278	GO:0016887	ATPase activity	F	8
isotig03411	GO:0051536	iron-sulfur cluster binding	F	8
isotig03411	GO:0008137	NADH dehydrogenase (ubiquinone) activity	F	8
isotig03426	GO:0004252	serine-type endopeptidase activity	F	8
isotig03457	GO:0005198	structural molecule activity	F	8
isotig03481	GO:0051287	NAD binding	F	8
isotig03482	GO:0016887	ATPase activity	F	8
isotig03482	GO:0051536	iron-sulfur cluster binding	F	8
isotig03518	GO:0008137	NADH dehydrogenase (ubiquinone) activity	F	8
isotig03522	GO:0005198	structural molecule activity	F	8
isotig03585	GO:0032403	protein complex binding	F	8
isotig03627	GO:0004252	serine-type endopeptidase activity	F	8
isotig03650	GO:0004871	signal transducer activity	F	8
isotig03718	GO:0008137	NADH dehydrogenase (ubiquinone) activity	F	8
isotig03732	GO:0008134	transcription factor binding	F	8
isotig03744	GO:0032403	protein complex binding	F	8
isotig03800	GO:0008134	transcription factor binding	F	8
isotig03842	GO:0019901	protein kinase binding	F	8
isotig03884	GO:0016887	ATPase activity	F	8
isotig04060	GO:0005198	structural molecule activity	F	8
isotig04083	GO:0051536	iron-sulfur cluster binding	F	8
isotig04083	GO:0005198	structural molecule activity	F	8
isotig04127	GO:0019843	rRNA binding	F	8
isotig04306	GO:0008134	transcription factor binding	F	8
isotig00664	GO:0003779	actin binding	F	9
isotig00912	GO:0003779	actin binding	F	9
isotig01000	GO:0003779	actin binding	F	9
isotig01044	GO:0003779	actin binding	F	9
isotig01197	GO:0003779	actin binding	F	9
isotig01231	GO:0016740	transferase activity	F	9
isotig01278	GO:0003779	actin binding	F	9
isotig01558	GO:0003779	actin binding	F	9
isotig02154	GO:0016740	transferase activity	F	9
isotig02672	GO:0016740	transferase activity	F	9
isotig03240	GO:0016740	transferase activity	F	9
isotig03306	GO:0016740	transferase activity	F	9
isotig03425	GO:0016740	transferase activity	F	9
isotig03625	GO:0003779	actin binding	F	9
isotig03697	GO:0016740	transferase activity	F	9
isotig03958	GO:0016740	transferase activity	F	9
isotig04051	GO:0016740	transferase activity	F	9
isotig04446	GO:0003779	actin binding	F	9
isotig00145	GO:0042802	identical protein binding	F	10
isotig00576	GO:0042802	identical protein binding	F	10
isotig00785	GO:0019904	protein domain specific binding	F	10
isotig01009	GO:0008289	lipid binding	F	10
isotig01071	GO:0042802	identical protein binding	F	10
isotig01118	GO:0008289	lipid binding	F	10
isotig01140	GO:0004298	threonine-type endopeptidase activity	F	10
isotig01164	GO:0008289	lipid binding	F	10
isotig01170	GO:0019904	protein domain specific binding	F	10
isotig01217	GO:0004298	threonine-type endopeptidase activity	F	10
isotig01249	GO:0004298	threonine-type endopeptidase activity	F	10
isotig01256	GO:0008289	lipid binding	F	10
isotig01320	GO:0019904	protein domain specific binding	F	10
isotig01374	GO:0004298	threonine-type endopeptidase activity	F	10
isotig01413	GO:0008289	lipid binding	F	10
isotig01588	GO:0004298	threonine-type endopeptidase activity	F	10
isotig01597	GO:0042802	identical protein binding	F	10
isotig01626	GO:0042802	identical protein binding	F	10
isotig01712	GO:0004298	threonine-type endopeptidase activity	F	10
isotig01800	GO:0004298	threonine-type endopeptidase activity	F	10
isotig01901	GO:0019904	protein domain specific binding	F	10
isotig02035	GO:0008289	lipid binding	F	10
isotig02350	GO:0004298	threonine-type endopeptidase activity	F	10
isotig02581	GO:0042802	identical protein binding	F	10
isotig02588	GO:0042802	identical protein binding	F	10
isotig02606	GO:0019904	protein domain specific binding	F	10
isotig02635	GO:0019904	protein domain specific binding	F	10
isotig02680	GO:0008289	lipid binding	F	10
isotig02805	GO:0019904	protein domain specific binding	F	10
isotig02848	GO:0008289	lipid binding	F	10
isotig02939	GO:0042802	identical protein binding	F	10
isotig03107	GO:0004298	threonine-type endopeptidase activity	F	10
isotig03171	GO:0008289	lipid binding	F	10
isotig03365	GO:0019904	protein domain specific binding	F	10
isotig03732	GO:0019904	protein domain specific binding	F	10
isotig03829	GO:0042802	identical protein binding	F	10
isotig03968	GO:0019904	protein domain specific binding	F	10
isotig04042	GO:0042802	identical protein binding	F	10
isotig04110	GO:0004298	threonine-type endopeptidase activity	F	10
isotig04124	GO:0008289	lipid binding	F	10
isotig00552	GO:0003729	mRNA binding	F	12
isotig01278	GO:0003729	mRNA binding	F	12
isotig01302	GO:0003729	mRNA binding	F	12
isotig01322	GO:0003729	mRNA binding	F	12
isotig01431	GO:0003729	mRNA binding	F	12
isotig01432	GO:0003729	mRNA binding	F	12
isotig01529	GO:0003729	mRNA binding	F	12
isotig02241	GO:0003729	mRNA binding	F	12
isotig03052	GO:0003729	mRNA binding	F	12
isotig03715	GO:0003729	mRNA binding	F	12
isotig04154	GO:0003729	mRNA binding	F	12
isotig04446	GO:0003729	mRNA binding	F	12
isotig00340	GO:0008233	peptidase activity	F	13
isotig00618	GO:0008233	peptidase activity	F	13
isotig00846	GO:0008233	peptidase activity	F	13
isotig00999	GO:0042302	structural constituent of cuticle	F	13
isotig01322	GO:0008233	peptidase activity	F	13
isotig01434	GO:0008233	peptidase activity	F	13
isotig01440	GO:0042302	structural constituent of cuticle	F	13
isotig01481	GO:0042302	structural constituent of cuticle	F	13
isotig01493	GO:0042302	structural constituent of cuticle	F	13
isotig01514	GO:0042302	structural constituent of cuticle	F	13
isotig01515	GO:0042302	structural constituent of cuticle	F	13
isotig01568	GO:0042302	structural constituent of cuticle	F	13
isotig01627	GO:0008233	peptidase activity	F	13
isotig01642	GO:0042302	structural constituent of cuticle	F	13
isotig01897	GO:0042302	structural constituent of cuticle	F	13
isotig01919	GO:0008233	peptidase activity	F	13
isotig02027	GO:0042302	structural constituent of cuticle	F	13
isotig02253	GO:0008233	peptidase activity	F	13
isotig02683	GO:0042302	structural constituent of cuticle	F	13
isotig02798	GO:0008233	peptidase activity	F	13
isotig03231	GO:0008233	peptidase activity	F	13
isotig03582	GO:0008233	peptidase activity	F	13
isotig03588	GO:0008233	peptidase activity	F	13
isotig04084	GO:0042302	structural constituent of cuticle	F	13
isotig04411	GO:0008233	peptidase activity	F	13
isotig04466	GO:0042302	structural constituent of cuticle	F	13
isotig00666	GO:0003676	nucleic acid binding	F	14
isotig00830	GO:0005509	calcium ion binding	F	14
isotig01036	GO:0005509	calcium ion binding	F	14
isotig01174	GO:0005509	calcium ion binding	F	14
isotig01406	GO:0003676	nucleic acid binding	F	14
isotig01447	GO:0003676	nucleic acid binding	F	14
isotig01457	GO:0005509	calcium ion binding	F	14
isotig01492	GO:0003676	nucleic acid binding	F	14
isotig01597	GO:0005509	calcium ion binding	F	14
isotig01598	GO:0005509	calcium ion binding	F	14
isotig01623	GO:0005509	calcium ion binding	F	14
isotig01670	GO:0003676	nucleic acid binding	F	14
isotig01725	GO:0003676	nucleic acid binding	F	14
isotig02135	GO:0005509	calcium ion binding	F	14
isotig02222	GO:0005509	calcium ion binding	F	14
isotig02235	GO:0005509	calcium ion binding	F	14
isotig02324	GO:0003676	nucleic acid binding	F	14
isotig02472	GO:0005509	calcium ion binding	F	14
isotig02495	GO:0003676	nucleic acid binding	F	14
isotig02804	GO:0003676	nucleic acid binding	F	14
isotig02997	GO:0003676	nucleic acid binding	F	14
isotig03101	GO:0005509	calcium ion binding	F	14
isotig03150	GO:0003676	nucleic acid binding	F	14
isotig03186	GO:0003676	nucleic acid binding	F	14
isotig03498	GO:0003676	nucleic acid binding	F	14
isotig03641	GO:0003676	nucleic acid binding	F	14
isotig03693	GO:0005509	calcium ion binding	F	14
isotig04042	GO:0005509	calcium ion binding	F	14
isotig00564	GO:0004842	ubiquitin-protein ligase activity	F	15
isotig01095	GO:0004842	ubiquitin-protein ligase activity	F	15
isotig01354	GO:0004842	ubiquitin-protein ligase activity	F	15
isotig01424	GO:0004842	ubiquitin-protein ligase activity	F	15
isotig01615	GO:0004842	ubiquitin-protein ligase activity	F	15
isotig01639	GO:0004842	ubiquitin-protein ligase activity	F	15
isotig01722	GO:0004842	ubiquitin-protein ligase activity	F	15
isotig01791	GO:0004842	ubiquitin-protein ligase activity	F	15
isotig02203	GO:0004842	ubiquitin-protein ligase activity	F	15
isotig02641	GO:0004842	ubiquitin-protein ligase activity	F	15
isotig03027	GO:0004842	ubiquitin-protein ligase activity	F	15
isotig03087	GO:0004842	ubiquitin-protein ligase activity	F	15
isotig03352	GO:0004842	ubiquitin-protein ligase activity	F	15
isotig03517	GO:0004842	ubiquitin-protein ligase activity	F	15
isotig03951	GO:0004842	ubiquitin-protein ligase activity	F	15
isotig00973	GO:0016787	hydrolase activity	F	17
isotig01013	GO:0016787	hydrolase activity	F	17
isotig01133	GO:0016787	hydrolase activity	F	17
isotig01347	GO:0016787	hydrolase activity	F	17
isotig01540	GO:0016787	hydrolase activity	F	17
isotig01582	GO:0016787	hydrolase activity	F	17
isotig01590	GO:0016787	hydrolase activity	F	17
isotig01640	GO:0016787	hydrolase activity	F	17
isotig01789	GO:0016787	hydrolase activity	F	17
isotig02367	GO:0016787	hydrolase activity	F	17
isotig02669	GO:0016787	hydrolase activity	F	17
isotig03045	GO:0016787	hydrolase activity	F	17
isotig03174	GO:0016787	hydrolase activity	F	17
isotig03198	GO:0016787	hydrolase activity	F	17
isotig03381	GO:0016787	hydrolase activity	F	17
isotig03863	GO:0016787	hydrolase activity	F	17
isotig04016	GO:0016787	hydrolase activity	F	17
isotig00388	GO:0003700	sequence-specific DNA binding transcription factor activity	F	19
isotig00714	GO:0003700	sequence-specific DNA binding transcription factor activity	F	19
isotig01052	GO:0003700	sequence-specific DNA binding transcription factor activity	F	19
isotig01245	GO:0003700	sequence-specific DNA binding transcription factor activity	F	19
isotig01332	GO:0003700	sequence-specific DNA binding transcription factor activity	F	19
isotig01758	GO:0003700	sequence-specific DNA binding transcription factor activity	F	19
isotig02515	GO:0003700	sequence-specific DNA binding transcription factor activity	F	19
isotig02569	GO:0003700	sequence-specific DNA binding transcription factor activity	F	19
isotig02679	GO:0003700	sequence-specific DNA binding transcription factor activity	F	19
isotig02685	GO:0003700	sequence-specific DNA binding transcription factor activity	F	19
isotig02939	GO:0003700	sequence-specific DNA binding transcription factor activity	F	19
isotig02988	GO:0003700	sequence-specific DNA binding transcription factor activity	F	19
isotig03003	GO:0003700	sequence-specific DNA binding transcription factor activity	F	19
isotig03168	GO:0003700	sequence-specific DNA binding transcription factor activity	F	19
isotig03498	GO:0003700	sequence-specific DNA binding transcription factor activity	F	19
isotig03692	GO:0003700	sequence-specific DNA binding transcription factor activity	F	19
isotig03715	GO:0003700	sequence-specific DNA binding transcription factor activity	F	19
isotig03732	GO:0003700	sequence-specific DNA binding transcription factor activity	F	19
isotig04055	GO:0003700	sequence-specific DNA binding transcription factor activity	F	19
isotig00672	GO:0051082	unfolded protein binding	F	20
isotig00721	GO:0051082	unfolded protein binding	F	20
isotig00773	GO:0009055	electron carrier activity	F	20
isotig00791	GO:0009055	electron carrier activity	F	20
isotig00802	GO:0009055	electron carrier activity	F	20
isotig00830	GO:0051082	unfolded protein binding	F	20
isotig00916	GO:0009055	electron carrier activity	F	20
isotig00984	GO:0051082	unfolded protein binding	F	20
isotig01005	GO:0009055	electron carrier activity	F	20
isotig01035	GO:0009055	electron carrier activity	F	20
isotig01042	GO:0051082	unfolded protein binding	F	20
isotig01045	GO:0051082	unfolded protein binding	F	20
isotig01086	GO:0051082	unfolded protein binding	F	20
isotig01154	GO:0009055	electron carrier activity	F	20
isotig01169	GO:0009055	electron carrier activity	F	20
isotig01500	GO:0009055	electron carrier activity	F	20
isotig01517	GO:0009055	electron carrier activity	F	20
isotig01525	GO:0051082	unfolded protein binding	F	20
isotig01755	GO:0009055	electron carrier activity	F	20
isotig01900	GO:0051082	unfolded protein binding	F	20
isotig01943	GO:0009055	electron carrier activity	F	20
isotig01967	GO:0009055	electron carrier activity	F	20
isotig02032	GO:0051082	unfolded protein binding	F	20
isotig02235	GO:0051082	unfolded protein binding	F	20
isotig02281	GO:0051082	unfolded protein binding	F	20
isotig02337	GO:0051082	unfolded protein binding	F	20
isotig02341	GO:0009055	electron carrier activity	F	20
isotig02489	GO:0051082	unfolded protein binding	F	20
isotig02678	GO:0009055	electron carrier activity	F	20
isotig02755	GO:0051082	unfolded protein binding	F	20
isotig02773	GO:0051082	unfolded protein binding	F	20
isotig03021	GO:0051082	unfolded protein binding	F	20
isotig03334	GO:0051082	unfolded protein binding	F	20
isotig03433	GO:0009055	electron carrier activity	F	20
isotig03482	GO:0009055	electron carrier activity	F	20
isotig03545	GO:0009055	electron carrier activity	F	20
isotig03718	GO:0009055	electron carrier activity	F	20
isotig03854	GO:0009055	electron carrier activity	F	20
isotig04172	GO:0051082	unfolded protein binding	F	20
isotig04417	GO:0051082	unfolded protein binding	F	20
isotig00135	GO:0003924	GTPase activity	F	21
isotig00140	GO:0003924	GTPase activity	F	21
isotig00257	GO:0003924	GTPase activity	F	21
isotig00308	GO:0003924	GTPase activity	F	21
isotig00762	GO:0003924	GTPase activity	F	21
isotig00775	GO:0003924	GTPase activity	F	21
isotig00793	GO:0003924	GTPase activity	F	21
isotig00829	GO:0003924	GTPase activity	F	21
isotig01098	GO:0003924	GTPase activity	F	21
isotig01524	GO:0003924	GTPase activity	F	21
isotig01574	GO:0003924	GTPase activity	F	21
isotig01926	GO:0003924	GTPase activity	F	21
isotig02003	GO:0003924	GTPase activity	F	21
isotig02126	GO:0003924	GTPase activity	F	21
isotig02662	GO:0003924	GTPase activity	F	21
isotig02991	GO:0003924	GTPase activity	F	21
isotig03054	GO:0003924	GTPase activity	F	21
isotig03264	GO:0003924	GTPase activity	F	21
isotig03279	GO:0003924	GTPase activity	F	21
isotig03428	GO:0003924	GTPase activity	F	21
isotig03564	GO:0003924	GTPase activity	F	21
isotig00080	GO:0003824	catalytic activity	F	24
isotig00324	GO:0003824	catalytic activity	F	24
isotig00544	GO:0003824	catalytic activity	F	24
isotig00560	GO:0003824	catalytic activity	F	24
isotig00628	GO:0003824	catalytic activity	F	24
isotig01212	GO:0003824	catalytic activity	F	24
isotig01255	GO:0003824	catalytic activity	F	24
isotig01345	GO:0003824	catalytic activity	F	24
isotig01375	GO:0003824	catalytic activity	F	24
isotig01387	GO:0003824	catalytic activity	F	24
isotig01449	GO:0003824	catalytic activity	F	24
isotig01480	GO:0003824	catalytic activity	F	24
isotig01662	GO:0003824	catalytic activity	F	24
isotig01770	GO:0003824	catalytic activity	F	24
isotig02160	GO:0003824	catalytic activity	F	24
isotig02360	GO:0003824	catalytic activity	F	24
isotig02574	GO:0003824	catalytic activity	F	24
isotig02713	GO:0003824	catalytic activity	F	24
isotig02826	GO:0003824	catalytic activity	F	24
isotig02994	GO:0003824	catalytic activity	F	24
isotig03073	GO:0003824	catalytic activity	F	24
isotig03098	GO:0003824	catalytic activity	F	24
isotig03800	GO:0003824	catalytic activity	F	24
isotig03809	GO:0003824	catalytic activity	F	24
isotig00372	GO:0042803	protein homodimerization activity	F	25
isotig00430	GO:0042803	protein homodimerization activity	F	25
isotig00616	GO:0042803	protein homodimerization activity	F	25
isotig00749	GO:0042803	protein homodimerization activity	F	25
isotig00834	GO:0042803	protein homodimerization activity	F	25
isotig01017	GO:0042803	protein homodimerization activity	F	25
isotig01087	GO:0042803	protein homodimerization activity	F	25
isotig01322	GO:0042803	protein homodimerization activity	F	25
isotig01339	GO:0042803	protein homodimerization activity	F	25
isotig01421	GO:0042803	protein homodimerization activity	F	25
isotig02022	GO:0042803	protein homodimerization activity	F	25
isotig02068	GO:0042803	protein homodimerization activity	F	25
isotig02115	GO:0042803	protein homodimerization activity	F	25
isotig02135	GO:0042803	protein homodimerization activity	F	25
isotig02206	GO:0042803	protein homodimerization activity	F	25
isotig02740	GO:0042803	protein homodimerization activity	F	25
isotig02782	GO:0042803	protein homodimerization activity	F	25
isotig02802	GO:0042803	protein homodimerization activity	F	25
isotig02845	GO:0042803	protein homodimerization activity	F	25
isotig02879	GO:0042803	protein homodimerization activity	F	25
isotig03121	GO:0042803	protein homodimerization activity	F	25
isotig03278	GO:0042803	protein homodimerization activity	F	25
isotig03285	GO:0042803	protein homodimerization activity	F	25
isotig03719	GO:0042803	protein homodimerization activity	F	25
isotig04137	GO:0042803	protein homodimerization activity	F	25
isotig00454	GO:0003743	translation initiation factor activity	F	27
isotig00750	GO:0003677	DNA binding	F	27
isotig00898	GO:0003743	translation initiation factor activity	F	27
isotig00904	GO:0003677	DNA binding	F	27
isotig00951	GO:0003743	translation initiation factor activity	F	27
isotig01125	GO:0003677	DNA binding	F	27
isotig01172	GO:0003677	DNA binding	F	27
isotig01241	GO:0003743	translation initiation factor activity	F	27
isotig01247	GO:0003743	translation initiation factor activity	F	27
isotig01314	GO:0003743	translation initiation factor activity	F	27
isotig01435	GO:0003743	translation initiation factor activity	F	27
isotig01531	GO:0003743	translation initiation factor activity	F	27
isotig01553	GO:0003743	translation initiation factor activity	F	27
isotig01671	GO:0003677	DNA binding	F	27
isotig01732	GO:0003743	translation initiation factor activity	F	27
isotig01830	GO:0003743	translation initiation factor activity	F	27
isotig01867	GO:0003677	DNA binding	F	27
isotig02037	GO:0003743	translation initiation factor activity	F	27
isotig02050	GO:0003677	DNA binding	F	27
isotig02075	GO:0003743	translation initiation factor activity	F	27
isotig02165	GO:0003677	DNA binding	F	27
isotig02406	GO:0003743	translation initiation factor activity	F	27
isotig02425	GO:0003677	DNA binding	F	27
isotig02440	GO:0003677	DNA binding	F	27
isotig02468	GO:0003743	translation initiation factor activity	F	27
isotig02571	GO:0003743	translation initiation factor activity	F	27
isotig02599	GO:0003743	translation initiation factor activity	F	27
isotig02672	GO:0003677	DNA binding	F	27
isotig02767	GO:0003743	translation initiation factor activity	F	27
isotig02797	GO:0003677	DNA binding	F	27
isotig02828	GO:0003677	DNA binding	F	27
isotig02849	GO:0003677	DNA binding	F	27
isotig02890	GO:0003743	translation initiation factor activity	F	27
isotig02962	GO:0003743	translation initiation factor activity	F	27
isotig03088	GO:0003677	DNA binding	F	27
isotig03151	GO:0003743	translation initiation factor activity	F	27
isotig03172	GO:0003743	translation initiation factor activity	F	27
isotig03272	GO:0003677	DNA binding	F	27
isotig03382	GO:0003743	translation initiation factor activity	F	27
isotig03395	GO:0003677	DNA binding	F	27
isotig03455	GO:0003677	DNA binding	F	27
isotig03549	GO:0003677	DNA binding	F	27
isotig03552	GO:0003677	DNA binding	F	27
isotig03732	GO:0003677	DNA binding	F	27
isotig03833	GO:0003743	translation initiation factor activity	F	27
isotig03837	GO:0003743	translation initiation factor activity	F	27
isotig03848	GO:0003677	DNA binding	F	27
isotig03868	GO:0003743	translation initiation factor activity	F	27
isotig04055	GO:0003677	DNA binding	F	27
isotig04157	GO:0003677	DNA binding	F	27
isotig04192	GO:0003677	DNA binding	F	27
isotig04201	GO:0003677	DNA binding	F	27
isotig04239	GO:0003677	DNA binding	F	27
isotig04358	GO:0003743	translation initiation factor activity	F	27
isotig00474	GO:0003723	RNA binding	F	31
isotig00750	GO:0003723	RNA binding	F	31
isotig01217	GO:0003723	RNA binding	F	31
isotig01271	GO:0003723	RNA binding	F	31
isotig01300	GO:0003723	RNA binding	F	31
isotig01309	GO:0003723	RNA binding	F	31
isotig01446	GO:0003723	RNA binding	F	31
isotig01585	GO:0003723	RNA binding	F	31
isotig01590	GO:0003723	RNA binding	F	31
isotig01712	GO:0003723	RNA binding	F	31
isotig01792	GO:0003723	RNA binding	F	31
isotig01998	GO:0003723	RNA binding	F	31
isotig02097	GO:0003723	RNA binding	F	31
isotig02185	GO:0003723	RNA binding	F	31
isotig02198	GO:0003723	RNA binding	F	31
isotig02231	GO:0003723	RNA binding	F	31
isotig02252	GO:0003723	RNA binding	F	31
isotig02268	GO:0003723	RNA binding	F	31
isotig02319	GO:0003723	RNA binding	F	31
isotig02525	GO:0003723	RNA binding	F	31
isotig02749	GO:0003723	RNA binding	F	31
isotig02793	GO:0003723	RNA binding	F	31
isotig02849	GO:0003723	RNA binding	F	31
isotig03175	GO:0003723	RNA binding	F	31
isotig03198	GO:0003723	RNA binding	F	31
isotig03622	GO:0003723	RNA binding	F	31
isotig03891	GO:0003723	RNA binding	F	31
isotig04006	GO:0003723	RNA binding	F	31
isotig04192	GO:0003723	RNA binding	F	31
isotig04200	GO:0003723	RNA binding	F	31
isotig04296	GO:0003723	RNA binding	F	31
isotig00316	GO:0016491	oxidoreductase activity	F	32
isotig00718	GO:0016491	oxidoreductase activity	F	32
isotig00812	GO:0016491	oxidoreductase activity	F	32
isotig00943	GO:0016491	oxidoreductase activity	F	32
isotig00944	GO:0016491	oxidoreductase activity	F	32
isotig01007	GO:0016491	oxidoreductase activity	F	32
isotig01024	GO:0016491	oxidoreductase activity	F	32
isotig01035	GO:0016491	oxidoreductase activity	F	32
isotig01134	GO:0016491	oxidoreductase activity	F	32
isotig01151	GO:0016491	oxidoreductase activity	F	32
isotig01337	GO:0016491	oxidoreductase activity	F	32
isotig01620	GO:0016491	oxidoreductase activity	F	32
isotig01625	GO:0016491	oxidoreductase activity	F	32
isotig01626	GO:0016491	oxidoreductase activity	F	32
isotig01808	GO:0016491	oxidoreductase activity	F	32
isotig01954	GO:0016491	oxidoreductase activity	F	32
isotig02042	GO:0016491	oxidoreductase activity	F	32
isotig02143	GO:0016491	oxidoreductase activity	F	32
isotig02345	GO:0016491	oxidoreductase activity	F	32
isotig02583	GO:0016491	oxidoreductase activity	F	32
isotig03111	GO:0016491	oxidoreductase activity	F	32
isotig03174	GO:0016491	oxidoreductase activity	F	32
isotig03285	GO:0016491	oxidoreductase activity	F	32
isotig03481	GO:0016491	oxidoreductase activity	F	32
isotig03486	GO:0016491	oxidoreductase activity	F	32
isotig03602	GO:0016491	oxidoreductase activity	F	32
isotig03634	GO:0016491	oxidoreductase activity	F	32
isotig03709	GO:0016491	oxidoreductase activity	F	32
isotig03782	GO:0016491	oxidoreductase activity	F	32
isotig03855	GO:0016491	oxidoreductase activity	F	32
isotig04010	GO:0016491	oxidoreductase activity	F	32
isotig04182	GO:0016491	oxidoreductase activity	F	32
isotig00504	GO:0005488	binding	F	36
isotig00560	GO:0005488	binding	F	36
isotig00606	GO:0005488	binding	F	36
isotig00771	GO:0005488	binding	F	36
isotig00803	GO:0005488	binding	F	36
isotig00908	GO:0005488	binding	F	36
isotig00914	GO:0005488	binding	F	36
isotig01173	GO:0005488	binding	F	36
isotig01225	GO:0005488	binding	F	36
isotig01338	GO:0005488	binding	F	36
isotig01416	GO:0005488	binding	F	36
isotig01603	GO:0005488	binding	F	36
isotig01614	GO:0005488	binding	F	36
isotig01647	GO:0005488	binding	F	36
isotig01697	GO:0005488	binding	F	36
isotig01734	GO:0005488	binding	F	36
isotig01827	GO:0005488	binding	F	36
isotig01839	GO:0005488	binding	F	36
isotig02173	GO:0005488	binding	F	36
isotig02333	GO:0005488	binding	F	36
isotig02386	GO:0005488	binding	F	36
isotig02446	GO:0005488	binding	F	36
isotig02453	GO:0005488	binding	F	36
isotig02791	GO:0005488	binding	F	36
isotig02832	GO:0005488	binding	F	36
isotig02952	GO:0005488	binding	F	36
isotig02994	GO:0005488	binding	F	36
isotig03000	GO:0005488	binding	F	36
isotig03056	GO:0005488	binding	F	36
isotig03232	GO:0005488	binding	F	36
isotig03692	GO:0005488	binding	F	36
isotig03855	GO:0005488	binding	F	36
isotig03877	GO:0005488	binding	F	36
isotig04065	GO:0005488	binding	F	36
isotig04134	GO:0005488	binding	F	36
isotig04283	GO:0005488	binding	F	36
isotig00322	GO:0008270	zinc ion binding	F	37
isotig00424	GO:0008270	zinc ion binding	F	37
isotig00714	GO:0008270	zinc ion binding	F	37
isotig01059	GO:0008270	zinc ion binding	F	37
isotig01071	GO:0008270	zinc ion binding	F	37
isotig01084	GO:0008270	zinc ion binding	F	37
isotig01114	GO:0008270	zinc ion binding	F	37
isotig01245	GO:0008270	zinc ion binding	F	37
isotig01372	GO:0008270	zinc ion binding	F	37
isotig01529	GO:0008270	zinc ion binding	F	37
isotig01574	GO:0008270	zinc ion binding	F	37
isotig01717	GO:0008270	zinc ion binding	F	37
isotig01764	GO:0008270	zinc ion binding	F	37
isotig01785	GO:0008270	zinc ion binding	F	37
isotig01952	GO:0008270	zinc ion binding	F	37
isotig02037	GO:0008270	zinc ion binding	F	37
isotig02113	GO:0008270	zinc ion binding	F	37
isotig02203	GO:0008270	zinc ion binding	F	37
isotig02252	GO:0008270	zinc ion binding	F	37
isotig02460	GO:0008270	zinc ion binding	F	37
isotig02497	GO:0008270	zinc ion binding	F	37
isotig02641	GO:0008270	zinc ion binding	F	37
isotig02673	GO:0008270	zinc ion binding	F	37
isotig02679	GO:0008270	zinc ion binding	F	37
isotig02710	GO:0008270	zinc ion binding	F	37
isotig02714	GO:0008270	zinc ion binding	F	37
isotig02847	GO:0008270	zinc ion binding	F	37
isotig02927	GO:0008270	zinc ion binding	F	37
isotig03150	GO:0008270	zinc ion binding	F	37
isotig03395	GO:0008270	zinc ion binding	F	37
isotig03437	GO:0008270	zinc ion binding	F	37
isotig03498	GO:0008270	zinc ion binding	F	37
isotig03820	GO:0008270	zinc ion binding	F	37
isotig03848	GO:0008270	zinc ion binding	F	37
isotig04012	GO:0008270	zinc ion binding	F	37
isotig04048	GO:0008270	zinc ion binding	F	37
isotig04386	GO:0008270	zinc ion binding	F	37
isotig00135	GO:0005525	GTP binding	F	39
isotig00140	GO:0005525	GTP binding	F	39
isotig00257	GO:0005525	GTP binding	F	39
isotig00308	GO:0005525	GTP binding	F	39
isotig00682	GO:0005525	GTP binding	F	39
isotig00762	GO:0005525	GTP binding	F	39
isotig00775	GO:0005525	GTP binding	F	39
isotig00793	GO:0005525	GTP binding	F	39
isotig00829	GO:0005525	GTP binding	F	39
isotig00858	GO:0005525	GTP binding	F	39
isotig00985	GO:0005525	GTP binding	F	39
isotig01062	GO:0005525	GTP binding	F	39
isotig01098	GO:0005525	GTP binding	F	39
isotig01131	GO:0005525	GTP binding	F	39
isotig01239	GO:0005525	GTP binding	F	39
isotig01247	GO:0005525	GTP binding	F	39
isotig01393	GO:0005525	GTP binding	F	39
isotig01556	GO:0005525	GTP binding	F	39
isotig01574	GO:0005525	GTP binding	F	39
isotig01711	GO:0005525	GTP binding	F	39
isotig01823	GO:0005525	GTP binding	F	39
isotig01939	GO:0005525	GTP binding	F	39
isotig02003	GO:0005525	GTP binding	F	39
isotig02049	GO:0005525	GTP binding	F	39
isotig02126	GO:0005525	GTP binding	F	39
isotig02367	GO:0005525	GTP binding	F	39
isotig02487	GO:0005525	GTP binding	F	39
isotig02553	GO:0005525	GTP binding	F	39
isotig02591	GO:0005525	GTP binding	F	39
isotig02662	GO:0005525	GTP binding	F	39
isotig02724	GO:0005525	GTP binding	F	39
isotig02991	GO:0005525	GTP binding	F	39
isotig03054	GO:0005525	GTP binding	F	39
isotig03264	GO:0005525	GTP binding	F	39
isotig03279	GO:0005525	GTP binding	F	39
isotig03428	GO:0005525	GTP binding	F	39
isotig03564	GO:0005525	GTP binding	F	39
isotig03650	GO:0005525	GTP binding	F	39
isotig03732	GO:0005525	GTP binding	F	39
isotig00446	GO:0000166	nucleotide binding	F	42
isotig00628	GO:0000166	nucleotide binding	F	42
isotig00716	GO:0000166	nucleotide binding	F	42
isotig00890	GO:0000166	nucleotide binding	F	42
isotig00916	GO:0000166	nucleotide binding	F	42
isotig00960	GO:0000166	nucleotide binding	F	42
isotig00976	GO:0000166	nucleotide binding	F	42
isotig01080	GO:0000166	nucleotide binding	F	42
isotig01160	GO:0000166	nucleotide binding	F	42
isotig01218	GO:0000166	nucleotide binding	F	42
isotig01278	GO:0000166	nucleotide binding	F	42
isotig01302	GO:0000166	nucleotide binding	F	42
isotig01327	GO:0000166	nucleotide binding	F	42
isotig01333	GO:0000166	nucleotide binding	F	42
isotig01446	GO:0000166	nucleotide binding	F	42
isotig01480	GO:0000166	nucleotide binding	F	42
isotig01529	GO:0000166	nucleotide binding	F	42
isotig01531	GO:0000166	nucleotide binding	F	42
isotig01773	GO:0000166	nucleotide binding	F	42
isotig01973	GO:0000166	nucleotide binding	F	42
isotig02078	GO:0000166	nucleotide binding	F	42
isotig02125	GO:0000166	nucleotide binding	F	42
isotig02268	GO:0000166	nucleotide binding	F	42
isotig02276	GO:0000166	nucleotide binding	F	42
isotig02587	GO:0000166	nucleotide binding	F	42
isotig02588	GO:0000166	nucleotide binding	F	42
isotig02605	GO:0000166	nucleotide binding	F	42
isotig02713	GO:0000166	nucleotide binding	F	42
isotig02786	GO:0000166	nucleotide binding	F	42
isotig02825	GO:0000166	nucleotide binding	F	42
isotig03156	GO:0000166	nucleotide binding	F	42
isotig03174	GO:0000166	nucleotide binding	F	42
isotig03285	GO:0000166	nucleotide binding	F	42
isotig03486	GO:0000166	nucleotide binding	F	42
isotig03534	GO:0000166	nucleotide binding	F	42
isotig03660	GO:0000166	nucleotide binding	F	42
isotig04006	GO:0000166	nucleotide binding	F	42
isotig04154	GO:0000166	nucleotide binding	F	42
isotig04192	GO:0000166	nucleotide binding	F	42
isotig04260	GO:0000166	nucleotide binding	F	42
isotig04386	GO:0000166	nucleotide binding	F	42
isotig04446	GO:0000166	nucleotide binding	F	42
isotig00382	GO:0046872	metal ion binding	F	62
isotig00518	GO:0046872	metal ion binding	F	62
isotig00544	GO:0046872	metal ion binding	F	62
isotig00823	GO:0046872	metal ion binding	F	62
isotig00878	GO:0046872	metal ion binding	F	62
isotig00885	GO:0046872	metal ion binding	F	62
isotig00975	GO:0046872	metal ion binding	F	62
isotig01035	GO:0046872	metal ion binding	F	62
isotig01041	GO:0046872	metal ion binding	F	62
isotig01056	GO:0046872	metal ion binding	F	62
isotig01162	GO:0046872	metal ion binding	F	62
isotig01175	GO:0046872	metal ion binding	F	62
isotig01202	GO:0046872	metal ion binding	F	62
isotig01233	GO:0046872	metal ion binding	F	62
isotig01242	GO:0046872	metal ion binding	F	62
isotig01363	GO:0046872	metal ion binding	F	62
isotig01393	GO:0046872	metal ion binding	F	62
isotig01550	GO:0046872	metal ion binding	F	62
isotig01578	GO:0046872	metal ion binding	F	62
isotig01600	GO:0046872	metal ion binding	F	62
isotig01619	GO:0046872	metal ion binding	F	62
isotig01706	GO:0046872	metal ion binding	F	62
isotig01711	GO:0046872	metal ion binding	F	62
isotig01808	GO:0046872	metal ion binding	F	62
isotig01910	GO:0046872	metal ion binding	F	62
isotig01935	GO:0046872	metal ion binding	F	62
isotig01981	GO:0046872	metal ion binding	F	62
isotig02116	GO:0046872	metal ion binding	F	62
isotig02239	GO:0046872	metal ion binding	F	62
isotig02242	GO:0046872	metal ion binding	F	62
isotig02339	GO:0046872	metal ion binding	F	62
isotig02487	GO:0046872	metal ion binding	F	62
isotig02553	GO:0046872	metal ion binding	F	62
isotig02583	GO:0046872	metal ion binding	F	62
isotig02632	GO:0046872	metal ion binding	F	62
isotig02724	GO:0046872	metal ion binding	F	62
isotig02740	GO:0046872	metal ion binding	F	62
isotig02782	GO:0046872	metal ion binding	F	62
isotig02851	GO:0046872	metal ion binding	F	62
isotig02997	GO:0046872	metal ion binding	F	62
isotig03021	GO:0046872	metal ion binding	F	62
isotig03248	GO:0046872	metal ion binding	F	62
isotig03275	GO:0046872	metal ion binding	F	62
isotig03382	GO:0046872	metal ion binding	F	62
isotig03391	GO:0046872	metal ion binding	F	62
isotig03545	GO:0046872	metal ion binding	F	62
isotig03549	GO:0046872	metal ion binding	F	62
isotig03602	GO:0046872	metal ion binding	F	62
isotig03650	GO:0046872	metal ion binding	F	62
isotig03709	GO:0046872	metal ion binding	F	62
isotig03718	GO:0046872	metal ion binding	F	62
isotig03784	GO:0046872	metal ion binding	F	62
isotig03826	GO:0046872	metal ion binding	F	62
isotig03927	GO:0046872	metal ion binding	F	62
isotig03954	GO:0046872	metal ion binding	F	62
isotig03977	GO:0046872	metal ion binding	F	62
isotig04058	GO:0046872	metal ion binding	F	62
isotig04083	GO:0046872	metal ion binding	F	62
isotig04137	GO:0046872	metal ion binding	F	62
isotig04201	GO:0046872	metal ion binding	F	62
isotig04286	GO:0046872	metal ion binding	F	62
isotig04314	GO:0046872	metal ion binding	F	62
isotig00329	GO:0005524	ATP binding	F	82
isotig00616	GO:0005524	ATP binding	F	82
isotig00672	GO:0005524	ATP binding	F	82
isotig00721	GO:0005524	ATP binding	F	82
isotig00724	GO:0005524	ATP binding	F	82
isotig00809	GO:0005524	ATP binding	F	82
isotig00826	GO:0005524	ATP binding	F	82
isotig00850	GO:0005524	ATP binding	F	82
isotig00878	GO:0005524	ATP binding	F	82
isotig00882	GO:0005524	ATP binding	F	82
isotig00896	GO:0005524	ATP binding	F	82
isotig00984	GO:0005524	ATP binding	F	82
isotig01021	GO:0005524	ATP binding	F	82
isotig01042	GO:0005524	ATP binding	F	82
isotig01045	GO:0005524	ATP binding	F	82
isotig01067	GO:0005524	ATP binding	F	82
isotig01086	GO:0005524	ATP binding	F	82
isotig01087	GO:0005524	ATP binding	F	82
isotig01095	GO:0005524	ATP binding	F	82
isotig01102	GO:0005524	ATP binding	F	82
isotig01203	GO:0005524	ATP binding	F	82
isotig01339	GO:0005524	ATP binding	F	82
isotig01413	GO:0005524	ATP binding	F	82
isotig01424	GO:0005524	ATP binding	F	82
isotig01447	GO:0005524	ATP binding	F	82
isotig01499	GO:0005524	ATP binding	F	82
isotig01507	GO:0005524	ATP binding	F	82
isotig01517	GO:0005524	ATP binding	F	82
isotig01525	GO:0005524	ATP binding	F	82
isotig01527	GO:0005524	ATP binding	F	82
isotig01600	GO:0005524	ATP binding	F	82
isotig01615	GO:0005524	ATP binding	F	82
isotig01704	GO:0005524	ATP binding	F	82
isotig01725	GO:0005524	ATP binding	F	82
isotig01791	GO:0005524	ATP binding	F	82
isotig01792	GO:0005524	ATP binding	F	82
isotig01831	GO:0005524	ATP binding	F	82
isotig01840	GO:0005524	ATP binding	F	82
isotig01888	GO:0005524	ATP binding	F	82
isotig01910	GO:0005524	ATP binding	F	82
isotig01943	GO:0005524	ATP binding	F	82
isotig01981	GO:0005524	ATP binding	F	82
isotig01988	GO:0005524	ATP binding	F	82
isotig02032	GO:0005524	ATP binding	F	82
isotig02281	GO:0005524	ATP binding	F	82
isotig02324	GO:0005524	ATP binding	F	82
isotig02340	GO:0005524	ATP binding	F	82
isotig02367	GO:0005524	ATP binding	F	82
isotig02434	GO:0005524	ATP binding	F	82
isotig02489	GO:0005524	ATP binding	F	82
isotig02672	GO:0005524	ATP binding	F	82
isotig02828	GO:0005524	ATP binding	F	82
isotig02845	GO:0005524	ATP binding	F	82
isotig02906	GO:0005524	ATP binding	F	82
isotig02945	GO:0005524	ATP binding	F	82
isotig02997	GO:0005524	ATP binding	F	82
isotig03021	GO:0005524	ATP binding	F	82
isotig03052	GO:0005524	ATP binding	F	82
isotig03057	GO:0005524	ATP binding	F	82
isotig03147	GO:0005524	ATP binding	F	82
isotig03237	GO:0005524	ATP binding	F	82
isotig03248	GO:0005524	ATP binding	F	82
isotig03263	GO:0005524	ATP binding	F	82
isotig03278	GO:0005524	ATP binding	F	82
isotig03296	GO:0005524	ATP binding	F	82
isotig03375	GO:0005524	ATP binding	F	82
isotig03380	GO:0005524	ATP binding	F	82
isotig03397	GO:0005524	ATP binding	F	82
isotig03482	GO:0005524	ATP binding	F	82
isotig03496	GO:0005524	ATP binding	F	82
isotig03541	GO:0005524	ATP binding	F	82
isotig03732	GO:0005524	ATP binding	F	82
isotig03744	GO:0005524	ATP binding	F	82
isotig03784	GO:0005524	ATP binding	F	82
isotig03884	GO:0005524	ATP binding	F	82
isotig03902	GO:0005524	ATP binding	F	82
isotig03968	GO:0005524	ATP binding	F	82
isotig04056	GO:0005524	ATP binding	F	82
isotig04166	GO:0005524	ATP binding	F	82
isotig04268	GO:0005524	ATP binding	F	82
isotig04314	GO:0005524	ATP binding	F	82
isotig04417	GO:0005524	ATP binding	F	82
isotig00107	GO:0003735	structural constituent of ribosome	F	84
isotig00128	GO:0003735	structural constituent of ribosome	F	84
isotig00426	GO:0003735	structural constituent of ribosome	F	84
isotig00474	GO:0003735	structural constituent of ribosome	F	84
isotig01023	GO:0003735	structural constituent of ribosome	F	84
isotig01100	GO:0003735	structural constituent of ribosome	F	84
isotig01126	GO:0003735	structural constituent of ribosome	F	84
isotig01137	GO:0003735	structural constituent of ribosome	F	84
isotig01201	GO:0003735	structural constituent of ribosome	F	84
isotig01218	GO:0003735	structural constituent of ribosome	F	84
isotig01300	GO:0003735	structural constituent of ribosome	F	84
isotig01318	GO:0003735	structural constituent of ribosome	F	84
isotig01321	GO:0003735	structural constituent of ribosome	F	84
isotig01381	GO:0003735	structural constituent of ribosome	F	84
isotig01386	GO:0003735	structural constituent of ribosome	F	84
isotig01432	GO:0003735	structural constituent of ribosome	F	84
isotig01521	GO:0003735	structural constituent of ribosome	F	84
isotig01537	GO:0003735	structural constituent of ribosome	F	84
isotig01622	GO:0003735	structural constituent of ribosome	F	84
isotig01724	GO:0003735	structural constituent of ribosome	F	84
isotig01745	GO:0003735	structural constituent of ribosome	F	84
isotig01780	GO:0003735	structural constituent of ribosome	F	84
isotig01879	GO:0003735	structural constituent of ribosome	F	84
isotig01912	GO:0003735	structural constituent of ribosome	F	84
isotig01913	GO:0003735	structural constituent of ribosome	F	84
isotig01945	GO:0003735	structural constituent of ribosome	F	84
isotig01993	GO:0003735	structural constituent of ribosome	F	84
isotig01998	GO:0003735	structural constituent of ribosome	F	84
isotig02023	GO:0003735	structural constituent of ribosome	F	84
isotig02081	GO:0003735	structural constituent of ribosome	F	84
isotig02153	GO:0003735	structural constituent of ribosome	F	84
isotig02198	GO:0003735	structural constituent of ribosome	F	84
isotig02208	GO:0003735	structural constituent of ribosome	F	84
isotig02231	GO:0003735	structural constituent of ribosome	F	84
isotig02248	GO:0003735	structural constituent of ribosome	F	84
isotig02283	GO:0003735	structural constituent of ribosome	F	84
isotig02335	GO:0003735	structural constituent of ribosome	F	84
isotig02423	GO:0003735	structural constituent of ribosome	F	84
isotig02429	GO:0003735	structural constituent of ribosome	F	84
isotig02464	GO:0003735	structural constituent of ribosome	F	84
isotig02490	GO:0003735	structural constituent of ribosome	F	84
isotig02547	GO:0003735	structural constituent of ribosome	F	84
isotig02575	GO:0003735	structural constituent of ribosome	F	84
isotig02596	GO:0003735	structural constituent of ribosome	F	84
isotig02605	GO:0003735	structural constituent of ribosome	F	84
isotig02634	GO:0003735	structural constituent of ribosome	F	84
isotig02704	GO:0003735	structural constituent of ribosome	F	84
isotig02706	GO:0003735	structural constituent of ribosome	F	84
isotig02733	GO:0003735	structural constituent of ribosome	F	84
isotig02741	GO:0003735	structural constituent of ribosome	F	84
isotig02864	GO:0003735	structural constituent of ribosome	F	84
isotig02889	GO:0003735	structural constituent of ribosome	F	84
isotig02965	GO:0003735	structural constituent of ribosome	F	84
isotig03010	GO:0003735	structural constituent of ribosome	F	84
isotig03019	GO:0003735	structural constituent of ribosome	F	84
isotig03053	GO:0003735	structural constituent of ribosome	F	84
isotig03080	GO:0003735	structural constituent of ribosome	F	84
isotig03196	GO:0003735	structural constituent of ribosome	F	84
isotig03275	GO:0003735	structural constituent of ribosome	F	84
isotig03372	GO:0003735	structural constituent of ribosome	F	84
isotig03497	GO:0003735	structural constituent of ribosome	F	84
isotig03532	GO:0003735	structural constituent of ribosome	F	84
isotig03548	GO:0003735	structural constituent of ribosome	F	84
isotig03622	GO:0003735	structural constituent of ribosome	F	84
isotig03660	GO:0003735	structural constituent of ribosome	F	84
isotig03707	GO:0003735	structural constituent of ribosome	F	84
isotig03715	GO:0003735	structural constituent of ribosome	F	84
isotig03769	GO:0003735	structural constituent of ribosome	F	84
isotig03846	GO:0003735	structural constituent of ribosome	F	84
isotig03976	GO:0003735	structural constituent of ribosome	F	84
isotig03977	GO:0003735	structural constituent of ribosome	F	84
isotig03987	GO:0003735	structural constituent of ribosome	F	84
isotig04017	GO:0003735	structural constituent of ribosome	F	84
isotig04031	GO:0003735	structural constituent of ribosome	F	84
isotig04101	GO:0003735	structural constituent of ribosome	F	84
isotig04127	GO:0003735	structural constituent of ribosome	F	84
isotig04146	GO:0003735	structural constituent of ribosome	F	84
isotig04196	GO:0003735	structural constituent of ribosome	F	84
isotig04228	GO:0003735	structural constituent of ribosome	F	84
isotig04272	GO:0003735	structural constituent of ribosome	F	84
isotig04309	GO:0003735	structural constituent of ribosome	F	84
isotig04313	GO:0003735	structural constituent of ribosome	F	84
isotig04403	GO:0003735	structural constituent of ribosome	F	84
isotig04439	GO:0003735	structural constituent of ribosome	F	84
isotig00296	GO:0005515	protein binding	F	93
isotig00314	GO:0005515	protein binding	F	93
isotig00452	GO:0005515	protein binding	F	93
isotig00552	GO:0005515	protein binding	F	93
isotig00640	GO:0005515	protein binding	F	93
isotig00777	GO:0005515	protein binding	F	93
isotig00778	GO:0005515	protein binding	F	93
isotig00856	GO:0005515	protein binding	F	93
isotig00897	GO:0005515	protein binding	F	93
isotig00965	GO:0005515	protein binding	F	93
isotig00966	GO:0005515	protein binding	F	93
isotig00967	GO:0005515	protein binding	F	93
isotig00975	GO:0005515	protein binding	F	93
isotig01006	GO:0005515	protein binding	F	93
isotig01075	GO:0005515	protein binding	F	93
isotig01098	GO:0005515	protein binding	F	93
isotig01105	GO:0005515	protein binding	F	93
isotig01168	GO:0005515	protein binding	F	93
isotig01181	GO:0005515	protein binding	F	93
isotig01217	GO:0005515	protein binding	F	93
isotig01249	GO:0005515	protein binding	F	93
isotig01271	GO:0005515	protein binding	F	93
isotig01291	GO:0005515	protein binding	F	93
isotig01302	GO:0005515	protein binding	F	93
isotig01304	GO:0005515	protein binding	F	93
isotig01450	GO:0005515	protein binding	F	93
isotig01484	GO:0005515	protein binding	F	93
isotig01528	GO:0005515	protein binding	F	93
isotig01575	GO:0005515	protein binding	F	93
isotig01639	GO:0005515	protein binding	F	93
isotig01668	GO:0005515	protein binding	F	93
isotig01681	GO:0005515	protein binding	F	93
isotig01709	GO:0005515	protein binding	F	93
isotig01732	GO:0005515	protein binding	F	93
isotig01739	GO:0005515	protein binding	F	93
isotig01748	GO:0005515	protein binding	F	93
isotig01781	GO:0005515	protein binding	F	93
isotig01835	GO:0005515	protein binding	F	93
isotig01910	GO:0005515	protein binding	F	93
isotig01920	GO:0005515	protein binding	F	93
isotig01940	GO:0005515	protein binding	F	93
isotig01946	GO:0005515	protein binding	F	93
isotig01985	GO:0005515	protein binding	F	93
isotig01995	GO:0005515	protein binding	F	93
isotig02141	GO:0005515	protein binding	F	93
isotig02152	GO:0005515	protein binding	F	93
isotig02179	GO:0005515	protein binding	F	93
isotig02190	GO:0005515	protein binding	F	93
isotig02222	GO:0005515	protein binding	F	93
isotig02237	GO:0005515	protein binding	F	93
isotig02326	GO:0005515	protein binding	F	93
isotig02362	GO:0005515	protein binding	F	93
isotig02363	GO:0005515	protein binding	F	93
isotig02371	GO:0005515	protein binding	F	93
isotig02416	GO:0005515	protein binding	F	93
isotig02447	GO:0005515	protein binding	F	93
isotig02468	GO:0005515	protein binding	F	93
isotig02531	GO:0005515	protein binding	F	93
isotig02576	GO:0005515	protein binding	F	93
isotig02619	GO:0005515	protein binding	F	93
isotig02622	GO:0005515	protein binding	F	93
isotig02669	GO:0005515	protein binding	F	93
isotig02685	GO:0005515	protein binding	F	93
isotig02758	GO:0005515	protein binding	F	93
isotig02774	GO:0005515	protein binding	F	93
isotig02798	GO:0005515	protein binding	F	93
isotig02812	GO:0005515	protein binding	F	93
isotig02847	GO:0005515	protein binding	F	93
isotig02919	GO:0005515	protein binding	F	93
isotig02945	GO:0005515	protein binding	F	93
isotig03003	GO:0005515	protein binding	F	93
isotig03052	GO:0005515	protein binding	F	93
isotig03186	GO:0005515	protein binding	F	93
isotig03353	GO:0005515	protein binding	F	93
isotig03395	GO:0005515	protein binding	F	93
isotig03397	GO:0005515	protein binding	F	93
isotig03445	GO:0005515	protein binding	F	93
isotig03457	GO:0005515	protein binding	F	93
isotig03575	GO:0005515	protein binding	F	93
isotig03595	GO:0005515	protein binding	F	93
isotig03617	GO:0005515	protein binding	F	93
isotig03626	GO:0005515	protein binding	F	93
isotig03645	GO:0005515	protein binding	F	93
isotig03694	GO:0005515	protein binding	F	93
isotig03704	GO:0005515	protein binding	F	93
isotig03902	GO:0005515	protein binding	F	93
isotig04012	GO:0005515	protein binding	F	93
isotig04029	GO:0005515	protein binding	F	93
isotig04074	GO:0005515	protein binding	F	93
isotig04154	GO:0005515	protein binding	F	93
isotig04230	GO:0005515	protein binding	F	93
isotig04286	GO:0005515	protein binding	F	93
isotig04433	GO:0005515	protein binding	F	93

## Sheet: T.dichotomus Cellular location
Hit	GO Term	Description	Type	Frequency
isotig00145	GO:0005721	centromeric heterochromatin	C	1
isotig00145	GO:0001940	male pronucleus	C	1
isotig00145	GO:0001939	female pronucleus	C	1
isotig00296	GO:0071944	cell periphery	C	1
isotig00308	GO:0070451	cell hair	C	1
isotig00408	GO:0000421	autophagic vacuole membrane	C	1
isotig00408	GO:0005790	smooth endoplasmic reticulum	C	1
isotig00584	GO:0071203	WASH complex	C	1
isotig00682	GO:0051286	cell tip	C	1
isotig00714	GO:0005700	polytene chromosome	C	1
isotig00726	GO:0000220	vacuolar proton-transporting V-type ATPase, V0 domain	C	1
isotig00838	GO:0005885	Arp2/3 protein complex	C	1
isotig00856	GO:0005678	chromatin assembly complex	C	1
isotig00919	GO:0030530	heterogeneous nuclear ribonucleoprotein complex	C	1
isotig00947	GO:0035097	histone methyltransferase complex	C	1
isotig00947	GO:0005720	nuclear heterochromatin	C	1
isotig00948	GO:0030981	cortical microtubule cytoskeleton	C	1
isotig00965	GO:0042589	zymogen granule membrane	C	1
isotig00975	GO:0043197	dendritic spine	C	1
isotig00975	GO:0000164	protein phosphatase type 1 complex	C	1
isotig00975	GO:0042587	glycogen granule	C	1
isotig01017	GO:0071458	integral to cytosolic side of endoplasmic reticulum membrane	C	1
isotig01021	GO:0000777	condensed chromosome kinetochore	C	1
isotig01021	GO:0005847	mRNA cleavage and polyadenylation specificity factor complex	C	1
isotig01044	GO:0019898	extrinsic to membrane	C	1
isotig01047	GO:0033178	proton-transporting two-sector ATPase complex, catalytic domain	C	1
isotig01052	GO:0005662	DNA replication factor A complex	C	1
isotig01098	GO:0072686	mitotic spindle	C	1
isotig01098	GO:0005880	nuclear microtubule	C	1
isotig01139	GO:0016529	sarcoplasmic reticulum	C	1
isotig01155	GO:0070013	intracellular organelle lumen	C	1
isotig01174	GO:0032154	cleavage furrow	C	1
isotig01242	GO:0005956	protein kinase CK2 complex	C	1
isotig01247	GO:0005850	eukaryotic translation initiation factor 2 complex	C	1
isotig01247	GO:0005851	eukaryotic translation initiation factor 2B complex	C	1
isotig01392	GO:0048046	apoplast	C	1
isotig01392	GO:0005773	vacuole	C	1
isotig01392	GO:0005618	cell wall	C	1
isotig01548	GO:0030286	dynein complex	C	1
isotig01552	GO:0030119	AP-type membrane coat adaptor complex	C	1
isotig01558	GO:0035182	female germline ring canal outer rim	C	1
isotig01558	GO:0035183	female germline ring canal inner rim	C	1
isotig01558	GO:0031672	A band	C	1
isotig01574	GO:0005701	polytene chromosome chromocenter	C	1
isotig01574	GO:0000792	heterochromatin	C	1
isotig01575	GO:0045177	apical part of cell	C	1
isotig01585	GO:0034364	high-density lipoprotein particle	C	1
isotig01702	GO:0005947	mitochondrial alpha-ketoglutarate dehydrogenase complex	C	1
isotig01717	GO:0019861	flagellum	C	1
isotig01722	GO:0031462	Cul2-RING ubiquitin ligase complex	C	1
isotig01722	GO:0031466	Cul5-RING ubiquitin ligase complex	C	1
isotig01785	GO:0030027	lamellipodium	C	1
isotig01817	GO:0016471	vacuolar proton-transporting V-type ATPase complex	C	1
isotig01901	GO:0005719	nuclear euchromatin	C	1
isotig01901	GO:0000779	condensed chromosome, centromeric region	C	1
isotig01901	GO:0031618	nuclear centromeric heterochromatin	C	1
isotig01919	GO:0005787	signal peptidase complex	C	1
isotig01921	GO:0055087	Ski complex	C	1
isotig01921	GO:0016593	Cdc73/Paf1 complex	C	1
isotig01988	GO:0043198	dendritic shaft	C	1
isotig01988	GO:0043034	costamere	C	1
isotig01988	GO:0001725	stress fiber	C	1
isotig01988	GO:0043195	terminal button	C	1
isotig01989	GO:0031080	nuclear pore outer ring	C	1
isotig01995	GO:0031428	box C/D snoRNP complex	C	1
isotig01995	GO:0070761	pre-snoRNP complex	C	1
isotig02047	GO:0000275	mitochondrial proton-transporting ATP synthase complex, catalytic core F(1)	C	1
isotig02055	GO:0005869	dynactin complex	C	1
isotig02097	GO:0000178	exosome (RNase complex)	C	1
isotig02113	GO:0005960	glycine cleavage complex	C	1
isotig02113	GO:0005604	basement membrane	C	1
isotig02125	GO:0005740	mitochondrial envelope	C	1
isotig02174	GO:0005770	late endosome	C	1
isotig02174	GO:0030897	HOPS complex	C	1
isotig02203	GO:0005680	anaphase-promoting complex	C	1
isotig02207	GO:0000138	Golgi trans cisterna	C	1
isotig02221	GO:0070776	MOZ/MORF histone acetyltransferase complex	C	1
isotig02241	GO:0042382	paraspeckles	C	1
isotig02241	GO:0005849	mRNA cleavage factor complex	C	1
isotig02319	GO:0044428	nuclear part	C	1
isotig02330	GO:0005756	mitochondrial proton-transporting ATP synthase, central stalk	C	1
isotig02339	GO:0009523	photosystem II	C	1
isotig02339	GO:0009522	photosystem I	C	1
isotig02363	GO:0031981	nuclear lumen	C	1
isotig02386	GO:0005736	DNA-directed RNA polymerase I complex	C	1
isotig02421	GO:0016591	DNA-directed RNA polymerase II, holoenzyme	C	1
isotig02425	GO:0000125	PCAF complex	C	1
isotig02425	GO:0030914	STAGA complex	C	1
isotig02425	GO:0033276	transcription factor TFTC complex	C	1
isotig02440	GO:0043626	PCNA complex	C	1
isotig02467	GO:0031205	endoplasmic reticulum Sec complex	C	1
isotig02468	GO:0005845	mRNA cap binding complex	C	1
isotig02522	GO:0031528	microvillus membrane	C	1
isotig02544	GO:0005643	nuclear pore	C	1
isotig02566	GO:0000276	mitochondrial proton-transporting ATP synthase complex, coupling factor F(o)	C	1
isotig02601	GO:0005776	autophagic vacuole	C	1
isotig02612	GO:0001726	ruffle	C	1
isotig02637	GO:0030665	clathrin coated vesicle membrane	C	1
isotig02673	GO:0030868	smooth endoplasmic reticulum membrane	C	1
isotig02704	GO:0005763	mitochondrial small ribosomal subunit	C	1
isotig02710	GO:0032044	DSIF complex	C	1
isotig02723	GO:0008540	proteasome regulatory particle, base subcomplex	C	1
isotig02763	GO:0030054	cell junction	C	1
isotig02783	GO:0031224	intrinsic to membrane	C	1
isotig02842	GO:0005581	collagen	C	1
isotig02846	GO:0030122	AP-2 adaptor complex	C	1
isotig02891	GO:0005884	actin filament	C	1
isotig02906	GO:0070382	exocytic vesicle	C	1
isotig02907	GO:0017054	negative cofactor 2 complex	C	1
isotig02919	GO:0044421	extracellular region part	C	1
isotig02939	GO:0070461	SAGA-type complex	C	1
isotig02939	GO:0071339	MLL1 complex	C	1
isotig02945	GO:0030893	meiotic cohesin complex	C	1
isotig02963	GO:0005753	mitochondrial proton-transporting ATP synthase complex	C	1
isotig02993	GO:0045335	phagocytic vesicle	C	1
isotig02993	GO:0031201	SNARE complex	C	1
isotig03054	GO:0005785	signal recognition particle receptor complex	C	1
isotig03079	GO:0030904	retromer complex	C	1
isotig03088	GO:0031464	Cul4A-RING ubiquitin ligase complex	C	1
isotig03088	GO:0031465	Cul4B-RING ubiquitin ligase complex	C	1
isotig03151	GO:0016281	eukaryotic translation initiation factor 4F complex	C	1
isotig03154	GO:0030137	COPI-coated vesicle	C	1
isotig03157	GO:0016507	mitochondrial fatty acid beta-oxidation multienzyme complex	C	1
isotig03177	GO:0035339	SPOTS complex	C	1
isotig03284	GO:0016469	proton-transporting two-sector ATPase complex	C	1
isotig03323	GO:0042406	extrinsic to endoplasmic reticulum membrane	C	1
isotig03347	GO:0071986	Ragulator complex	C	1
isotig03365	GO:0010008	endosome membrane	C	1
isotig03395	GO:0000151	ubiquitin ligase complex	C	1
isotig03398	GO:0005801	cis-Golgi network	C	1
isotig03398	GO:0070971	endoplasmic reticulum exit site	C	1
isotig03427	GO:0005876	spindle microtubule	C	1
isotig03455	GO:0044451	nucleoplasm part	C	1
isotig03457	GO:0030130	clathrin coat of trans-Golgi network vesicle	C	1
isotig03534	GO:0044292	dendrite terminus	C	1
isotig03534	GO:0043679	axon terminus	C	1
isotig03545	GO:0017133	mitochondrial electron transfer flavoprotein complex	C	1
isotig03572	GO:0008274	gamma-tubulin ring complex	C	1
isotig03599	GO:0009538	photosystem I reaction center	C	1
isotig03721	GO:0005923	tight junction	C	1
isotig03721	GO:0045211	postsynaptic membrane	C	1
isotig03911	GO:0032133	chromosome passenger complex	C	1
isotig03968	GO:0016605	PML body	C	1
isotig03968	GO:0031931	TORC1 complex	C	1
isotig03968	GO:0070438	mTOR-FKBP12-rapamycin complex	C	1
isotig04018	GO:0045259	proton-transporting ATP synthase complex	C	1
isotig04042	GO:0031430	M band	C	1
isotig04042	GO:0000794	condensed nuclear chromosome	C	1
isotig04074	GO:0005742	mitochondrial outer membrane translocase complex	C	1
isotig04154	GO:0005692	U11 snRNP	C	1
isotig04213	GO:0010494	cytoplasmic stress granule	C	1
isotig04268	GO:0005774	vacuolar membrane	C	1
isotig04306	GO:0016580	Sin3 complex	C	1
isotig04327	GO:0071595	Nem1-Spo7 phosphatase complex	C	1
isotig00086	GO:0030125	clathrin vesicle coat	C	2
isotig00086	GO:0008021	synaptic vesicle	C	2
isotig00135	GO:0045298	tubulin complex	C	2
isotig00135	GO:0000235	astral microtubule	C	2
isotig00140	GO:0045298	tubulin complex	C	2
isotig00140	GO:0000235	astral microtubule	C	2
isotig00145	GO:0010369	chromocenter	C	2
isotig00282	GO:0033116	endoplasmic reticulum-Golgi intermediate compartment membrane	C	2
isotig00296	GO:0044430	cytoskeletal part	C	2
isotig00322	GO:0030018	Z disc	C	2
isotig00408	GO:0044297	cell body	C	2
isotig00518	GO:0072357	PTW/PP1 phosphatase complex	C	2
isotig00664	GO:0005865	striated muscle thin filament	C	2
isotig00682	GO:0005778	peroxisomal membrane	C	2
isotig00695	GO:0005587	collagen type IV	C	2
isotig00709	GO:0005863	striated muscle myosin thick filament	C	2
isotig00878	GO:0033017	sarcoplasmic reticulum membrane	C	2
isotig00930	GO:0008541	proteasome regulatory particle, lid subcomplex	C	2
isotig00947	GO:0017053	transcriptional repressor complex	C	2
isotig00947	GO:0000118	histone deacetylase complex	C	2
isotig00947	GO:0000776	kinetochore	C	2
isotig00947	GO:0010369	chromocenter	C	2
isotig00975	GO:0072357	PTW/PP1 phosphatase complex	C	2
isotig00975	GO:0070688	MLL5-L complex	C	2
isotig00975	GO:0043204	perikaryon	C	2
isotig00993	GO:0000221	vacuolar proton-transporting V-type ATPase, V1 domain	C	2
isotig01017	GO:0071556	integral to lumenal side of endoplasmic reticulum membrane	C	2
isotig01036	GO:0016459	myosin complex	C	2
isotig01052	GO:0030425	dendrite	C	2
isotig01093	GO:0016323	basolateral plasma membrane	C	2
isotig01174	GO:0016461	unconventional myosin complex	C	2
isotig01174	GO:0051233	spindle midzone	C	2
isotig01175	GO:0030133	transport vesicle	C	2
isotig01197	GO:0008290	F-actin capping protein complex	C	2
isotig01218	GO:0031932	TORC2 complex	C	2
isotig01245	GO:0031941	filamentous actin	C	2
isotig01267	GO:0008541	proteasome regulatory particle, lid subcomplex	C	2
isotig01277	GO:0016600	flotillin complex	C	2
isotig01281	GO:0016328	lateral plasma membrane	C	2
isotig01302	GO:0035327	transcriptionally active chromatin	C	2
isotig01344	GO:0016328	lateral plasma membrane	C	2
isotig01457	GO:0005859	muscle myosin complex	C	2
isotig01524	GO:0005834	heterotrimeric G-protein complex	C	2
isotig01548	GO:0016459	myosin complex	C	2
isotig01558	GO:0005863	striated muscle myosin thick filament	C	2
isotig01567	GO:0030125	clathrin vesicle coat	C	2
isotig01597	GO:0012505	endomembrane system	C	2
isotig01598	GO:0016461	unconventional myosin complex	C	2
isotig01614	GO:0048188	Set1C/COMPASS complex	C	2
isotig01621	GO:0031965	nuclear membrane	C	2
isotig01690	GO:0044429	mitochondrial part	C	2
isotig01691	GO:0005732	small nucleolar ribonucleoprotein complex	C	2
isotig01709	GO:0071556	integral to lumenal side of endoplasmic reticulum membrane	C	2
isotig01712	GO:0016363	nuclear matrix	C	2
isotig01722	GO:0030891	VCB complex	C	2
isotig01742	GO:0030176	integral to endoplasmic reticulum membrane	C	2
isotig01742	GO:0005784	Sec61 translocon complex	C	2
isotig01747	GO:0005578	proteinaceous extracellular matrix	C	2
isotig01813	GO:0015630	microtubule cytoskeleton	C	2
isotig01868	GO:0005784	Sec61 translocon complex	C	2
isotig01921	GO:0035327	transcriptionally active chromatin	C	2
isotig01926	GO:0005834	heterotrimeric G-protein complex	C	2
isotig01954	GO:0042995	cell projection	C	2
isotig01967	GO:0060187	cell pole	C	2
isotig01967	GO:0070732	spindle envelope	C	2
isotig01981	GO:0033017	sarcoplasmic reticulum membrane	C	2
isotig01989	GO:0000776	kinetochore	C	2
isotig02003	GO:0005940	septin ring	C	2
isotig02003	GO:0031105	septin complex	C	2
isotig02017	GO:0016023	cytoplasmic membrane-bounded vesicle	C	2
isotig02055	GO:0008290	F-actin capping protein complex	C	2
isotig02068	GO:0005782	peroxisomal matrix	C	2
isotig02091	GO:0000221	vacuolar proton-transporting V-type ATPase, V1 domain	C	2
isotig02093	GO:0072546	ER membrane protein complex	C	2
isotig02114	GO:0045495	pole plasm	C	2
isotig02115	GO:0005782	peroxisomal matrix	C	2
isotig02124	GO:0005587	collagen type IV	C	2
isotig02126	GO:0033116	endoplasmic reticulum-Golgi intermediate compartment membrane	C	2
isotig02136	GO:0030176	integral to endoplasmic reticulum membrane	C	2
isotig02152	GO:0030014	CCR4-NOT complex	C	2
isotig02179	GO:0016023	cytoplasmic membrane-bounded vesicle	C	2
isotig02218	GO:0005746	mitochondrial respiratory chain	C	2
isotig02221	GO:0035267	NuA4 histone acetyltransferase complex	C	2
isotig02247	GO:0030141	secretory granule	C	2
isotig02263	GO:0005750	mitochondrial respiratory chain complex III	C	2
isotig02264	GO:0043226	organelle	C	2
isotig02268	GO:0005689	U12-type spliceosomal complex	C	2
isotig02319	GO:0005732	small nucleolar ribonucleoprotein complex	C	2
isotig02339	GO:0009535	chloroplast thylakoid membrane	C	2
isotig02341	GO:0060187	cell pole	C	2
isotig02341	GO:0070732	spindle envelope	C	2
isotig02413	GO:0008021	synaptic vesicle	C	2
isotig02414	GO:0044429	mitochondrial part	C	2
isotig02455	GO:0072546	ER membrane protein complex	C	2
isotig02526	GO:0042719	mitochondrial intermembrane space protein transporter complex	C	2
isotig02576	GO:0030014	CCR4-NOT complex	C	2
isotig02625	GO:0030136	clathrin-coated vesicle	C	2
isotig02679	GO:0031941	filamentous actin	C	2
isotig02685	GO:0000118	histone deacetylase complex	C	2
isotig02740	GO:0042719	mitochondrial intermembrane space protein transporter complex	C	2
isotig02758	GO:0030129	clathrin coat of synaptic vesicle	C	2
isotig02770	GO:0015630	microtubule cytoskeleton	C	2
isotig02770	GO:0044430	cytoskeletal part	C	2
isotig02906	GO:0043204	perikaryon	C	2
isotig02907	GO:0005671	Ada2/Gcn5/Ada3 transcription activator complex	C	2
isotig02919	GO:0031012	extracellular matrix	C	2
isotig02920	GO:0042995	cell projection	C	2
isotig02939	GO:0048188	Set1C/COMPASS complex	C	2
isotig02939	GO:0005671	Ada2/Gcn5/Ada3 transcription activator complex	C	2
isotig02939	GO:0070688	MLL5-L complex	C	2
isotig02945	GO:0000785	chromatin	C	2
isotig02953	GO:0043226	organelle	C	2
isotig03087	GO:0030891	VCB complex	C	2
isotig03101	GO:0005859	muscle myosin complex	C	2
isotig03220	GO:0005578	proteinaceous extracellular matrix	C	2
isotig03258	GO:0033179	proton-transporting V-type ATPase, V0 domain	C	2
isotig03272	GO:0035267	NuA4 histone acetyltransferase complex	C	2
isotig03278	GO:0005778	peroxisomal membrane	C	2
isotig03337	GO:0012505	endomembrane system	C	2
isotig03365	GO:0030141	secretory granule	C	2
isotig03427	GO:0017053	transcriptional repressor complex	C	2
isotig03457	GO:0030129	clathrin coat of synaptic vesicle	C	2
isotig03534	GO:0044297	cell body	C	2
isotig03546	GO:0005746	mitochondrial respiratory chain	C	2
isotig03558	GO:0033179	proton-transporting V-type ATPase, V0 domain	C	2
isotig03564	GO:0005940	septin ring	C	2
isotig03564	GO:0031105	septin complex	C	2
isotig03585	GO:0005750	mitochondrial respiratory chain complex III	C	2
isotig03599	GO:0009535	chloroplast thylakoid membrane	C	2
isotig03693	GO:0031012	extracellular matrix	C	2
isotig03721	GO:0016323	basolateral plasma membrane	C	2
isotig03732	GO:0015030	Cajal body	C	2
isotig03815	GO:0045495	pole plasm	C	2
isotig03911	GO:0000785	chromatin	C	2
isotig03911	GO:0051233	spindle midzone	C	2
isotig03968	GO:0031932	TORC2 complex	C	2
isotig03968	GO:0030425	dendrite	C	2
isotig04011	GO:0015030	Cajal body	C	2
isotig04042	GO:0005865	striated muscle thin filament	C	2
isotig04042	GO:0030018	Z disc	C	2
isotig04055	GO:0016363	nuclear matrix	C	2
isotig04055	GO:0005689	U12-type spliceosomal complex	C	2
isotig04060	GO:0016600	flotillin complex	C	2
isotig04124	GO:0030136	clathrin-coated vesicle	C	2
isotig04286	GO:0030133	transport vesicle	C	2
isotig04327	GO:0031965	nuclear membrane	C	2
isotig00170	GO:0045121	membrane raft	C	3
isotig00408	GO:0031410	cytoplasmic vesicle	C	3
isotig00552	GO:0005703	polytene chromosome puff	C	3
isotig00576	GO:0030496	midbody	C	3
isotig00682	GO:0031410	cytoplasmic vesicle	C	3
isotig00716	GO:0005844	polysome	C	3
isotig00788	GO:0030424	axon	C	3
isotig00789	GO:0031519	PcG protein complex	C	3
isotig00916	GO:0000267	cell fraction	C	3
isotig00919	GO:0005703	polytene chromosome puff	C	3
isotig00965	GO:0030672	synaptic vesicle membrane	C	3
isotig00984	GO:0005832	chaperonin-containing T-complex	C	3
isotig00985	GO:0031901	early endosome membrane	C	3
isotig01017	GO:0009986	cell surface	C	3
isotig01017	GO:0005791	rough endoplasmic reticulum	C	3
isotig01021	GO:0005815	microtubule organizing center	C	3
isotig01044	GO:0005912	adherens junction	C	3
isotig01045	GO:0005832	chaperonin-containing T-complex	C	3
isotig01059	GO:0005925	focal adhesion	C	3
isotig01087	GO:0009897	external side of plasma membrane	C	3
isotig01125	GO:0005665	DNA-directed RNA polymerase II, core complex	C	3
isotig01174	GO:0005911	cell-cell junction	C	3
isotig01174	GO:0030496	midbody	C	3
isotig01174	GO:0005912	adherens junction	C	3
isotig01217	GO:0005844	polysome	C	3
isotig01231	GO:0030017	sarcomere	C	3
isotig01239	GO:0005912	adherens junction	C	3
isotig01242	GO:0031519	PcG protein complex	C	3
isotig01256	GO:0045263	proton-transporting ATP synthase complex, coupling factor F(o)	C	3
isotig01304	GO:0019005	SCF ubiquitin ligase complex	C	3
isotig01339	GO:0009897	external side of plasma membrane	C	3
isotig01372	GO:0000775	chromosome, centromeric region	C	3
isotig01372	GO:0030496	midbody	C	3
isotig01431	GO:0005786	signal recognition particle, endoplasmic reticulum targeting	C	3
isotig01461	GO:0045263	proton-transporting ATP synthase complex, coupling factor F(o)	C	3
isotig01525	GO:0005832	chaperonin-containing T-complex	C	3
isotig01527	GO:0035145	exon-exon junction complex	C	3
isotig01552	GO:0030659	cytoplasmic vesicle membrane	C	3
isotig01552	GO:0005765	lysosomal membrane	C	3
isotig01572	GO:0000267	cell fraction	C	3
isotig01574	GO:0000775	chromosome, centromeric region	C	3
isotig01575	GO:0005911	cell-cell junction	C	3
isotig01575	GO:0014069	postsynaptic density	C	3
isotig01597	GO:0030017	sarcomere	C	3
isotig01671	GO:0005665	DNA-directed RNA polymerase II, core complex	C	3
isotig01712	GO:0005844	polysome	C	3
isotig01712	GO:0030017	sarcomere	C	3
isotig01781	GO:0008180	signalosome	C	3
isotig01785	GO:0005925	focal adhesion	C	3
isotig01813	GO:0005744	mitochondrial inner membrane presequence translocase complex	C	3
isotig01830	GO:0030424	axon	C	3
isotig01831	GO:0035145	exon-exon junction complex	C	3
isotig01834	GO:0014069	postsynaptic density	C	3
isotig01867	GO:0005669	transcription factor TFIID complex	C	3
isotig01876	GO:0031410	cytoplasmic vesicle	C	3
isotig01879	GO:0005762	mitochondrial large ribosomal subunit	C	3
isotig01901	GO:0005635	nuclear envelope	C	3
isotig01939	GO:0005802	trans-Golgi network	C	3
isotig01967	GO:0005635	nuclear envelope	C	3
isotig01967	GO:0005791	rough endoplasmic reticulum	C	3
isotig01988	GO:0005925	focal adhesion	C	3
isotig01988	GO:0005911	cell-cell junction	C	3
isotig02003	GO:0045172	germline ring canal	C	3
isotig02035	GO:0045263	proton-transporting ATP synthase complex, coupling factor F(o)	C	3
isotig02073	GO:0030127	COPII vesicle coat	C	3
isotig02114	GO:0035145	exon-exon junction complex	C	3
isotig02247	GO:0009986	cell surface	C	3
isotig02252	GO:0005685	U1 snRNP	C	3
isotig02341	GO:0005635	nuclear envelope	C	3
isotig02341	GO:0005791	rough endoplasmic reticulum	C	3
isotig02371	GO:0005744	mitochondrial inner membrane presequence translocase complex	C	3
isotig02425	GO:0005669	transcription factor TFIID complex	C	3
isotig02460	GO:0030127	COPII vesicle coat	C	3
isotig02489	GO:0005815	microtubule organizing center	C	3
isotig02497	GO:0009897	external side of plasma membrane	C	3
isotig02526	GO:0005744	mitochondrial inner membrane presequence translocase complex	C	3
isotig02531	GO:0005868	cytoplasmic dynein complex	C	3
isotig02571	GO:0030424	axon	C	3
isotig02584	GO:0005786	signal recognition particle, endoplasmic reticulum targeting	C	3
isotig02641	GO:0019005	SCF ubiquitin ligase complex	C	3
isotig02662	GO:0005786	signal recognition particle, endoplasmic reticulum targeting	C	3
isotig02673	GO:0030127	COPII vesicle coat	C	3
isotig02758	GO:0005802	trans-Golgi network	C	3
isotig02763	GO:0030672	synaptic vesicle membrane	C	3
isotig02797	GO:0005665	DNA-directed RNA polymerase II, core complex	C	3
isotig02805	GO:0045172	germline ring canal	C	3
isotig02847	GO:0031519	PcG protein complex	C	3
isotig02906	GO:0031901	early endosome membrane	C	3
isotig02906	GO:0030672	synaptic vesicle membrane	C	3
isotig02906	GO:0045121	membrane raft	C	3
isotig02945	GO:0000775	chromosome, centromeric region	C	3
isotig02953	GO:0000267	cell fraction	C	3
isotig02988	GO:0005669	transcription factor TFIID complex	C	3
isotig02993	GO:0030659	cytoplasmic vesicle membrane	C	3
isotig02993	GO:0005765	lysosomal membrane	C	3
isotig03052	GO:0005703	polytene chromosome puff	C	3
isotig03128	GO:0005815	microtubule organizing center	C	3
isotig03347	GO:0005765	lysosomal membrane	C	3
isotig03352	GO:0019005	SCF ubiquitin ligase complex	C	3
isotig03391	GO:0008180	signalosome	C	3
isotig03457	GO:0005802	trans-Golgi network	C	3
isotig03491	GO:0005868	cytoplasmic dynein complex	C	3
isotig03564	GO:0045172	germline ring canal	C	3
isotig03626	GO:0005868	cytoplasmic dynein complex	C	3
isotig03647	GO:0008180	signalosome	C	3
isotig03693	GO:0045121	membrane raft	C	3
isotig03715	GO:0005762	mitochondrial large ribosomal subunit	C	3
isotig03721	GO:0014069	postsynaptic density	C	3
isotig03981	GO:0005685	U1 snRNP	C	3
isotig04122	GO:0030659	cytoplasmic vesicle membrane	C	3
isotig04122	GO:0031901	early endosome membrane	C	3
isotig04154	GO:0005685	U1 snRNP	C	3
isotig04309	GO:0005762	mitochondrial large ribosomal subunit	C	3
isotig04417	GO:0009986	cell surface	C	3
isotig00666	GO:0005681	spliceosomal complex	C	4
isotig00789	GO:0005694	chromosome	C	4
isotig00879	GO:0042645	mitochondrial nucleoid	C	4
isotig00880	GO:0043232	intracellular non-membrane-bounded organelle	C	4
isotig00982	GO:0008250	oligosaccharyltransferase complex	C	4
isotig01001	GO:0000932	cytoplasmic mRNA processing body	C	4
isotig01086	GO:0042470	melanosome	C	4
isotig01087	GO:0055037	recycling endosome	C	4
isotig01093	GO:0005921	gap junction	C	4
isotig01114	GO:0005741	mitochondrial outer membrane	C	4
isotig01140	GO:0005839	proteasome core complex	C	4
isotig01170	GO:0042470	melanosome	C	4
isotig01172	GO:0000786	nucleosome	C	4
isotig01174	GO:0016324	apical plasma membrane	C	4
isotig01250	GO:0005667	transcription factor complex	C	4
isotig01256	GO:0031966	mitochondrial membrane	C	4
isotig01281	GO:0005921	gap junction	C	4
isotig01339	GO:0055037	recycling endosome	C	4
isotig01344	GO:0005921	gap junction	C	4
isotig01446	GO:0005694	chromosome	C	4
isotig01507	GO:0033180	proton-transporting V-type ATPase, V1 domain	C	4
isotig01519	GO:0055037	recycling endosome	C	4
isotig01573	GO:0043232	intracellular non-membrane-bounded organelle	C	4
isotig01597	GO:0005793	endoplasmic reticulum-Golgi intermediate compartment	C	4
isotig01704	GO:0033180	proton-transporting V-type ATPase, V1 domain	C	4
isotig01722	GO:0005667	transcription factor complex	C	4
isotig01725	GO:0005681	spliceosomal complex	C	4
isotig01760	GO:0033180	proton-transporting V-type ATPase, V1 domain	C	4
isotig01800	GO:0005839	proteasome core complex	C	4
isotig01813	GO:0031305	integral to mitochondrial inner membrane	C	4
isotig01817	GO:0016324	apical plasma membrane	C	4
isotig01889	GO:0043232	intracellular non-membrane-bounded organelle	C	4
isotig01900	GO:0016272	prefoldin complex	C	4
isotig02035	GO:0031966	mitochondrial membrane	C	4
isotig02037	GO:0005667	transcription factor complex	C	4
isotig02050	GO:0000786	nucleosome	C	4
isotig02055	GO:0016324	apical plasma membrane	C	4
isotig02073	GO:0005793	endoplasmic reticulum-Golgi intermediate compartment	C	4
isotig02094	GO:0008250	oligosaccharyltransferase complex	C	4
isotig02109	GO:0005747	mitochondrial respiratory chain complex I	C	4
isotig02126	GO:0042470	melanosome	C	4
isotig02174	GO:0055037	recycling endosome	C	4
isotig02235	GO:0042470	melanosome	C	4
isotig02298	GO:0030532	small nuclear ribonucleoprotein complex	C	4
isotig02331	GO:0008250	oligosaccharyltransferase complex	C	4
isotig02337	GO:0016272	prefoldin complex	C	4
isotig02350	GO:0005839	proteasome core complex	C	4
isotig02371	GO:0031305	integral to mitochondrial inner membrane	C	4
isotig02434	GO:0033180	proton-transporting V-type ATPase, V1 domain	C	4
isotig02438	GO:0016592	mediator complex	C	4
isotig02472	GO:0016324	apical plasma membrane	C	4
isotig02525	GO:0005681	spliceosomal complex	C	4
isotig02670	GO:0005686	U2 snRNP	C	4
isotig02755	GO:0016272	prefoldin complex	C	4
isotig02774	GO:0030532	small nuclear ribonucleoprotein complex	C	4
isotig02774	GO:0000932	cytoplasmic mRNA processing body	C	4
isotig02777	GO:0016592	mediator complex	C	4
isotig02805	GO:0005694	chromosome	C	4
isotig02888	GO:0005921	gap junction	C	4
isotig03021	GO:0005741	mitochondrial outer membrane	C	4
isotig03157	GO:0042645	mitochondrial nucleoid	C	4
isotig03157	GO:0005741	mitochondrial outer membrane	C	4
isotig03168	GO:0005667	transcription factor complex	C	4
isotig03192	GO:0005747	mitochondrial respiratory chain complex I	C	4
isotig03272	GO:0000786	nucleosome	C	4
isotig03353	GO:0031966	mitochondrial membrane	C	4
isotig03355	GO:0016592	mediator complex	C	4
isotig03398	GO:0005793	endoplasmic reticulum-Golgi intermediate compartment	C	4
isotig03411	GO:0005747	mitochondrial respiratory chain complex I	C	4
isotig03455	GO:0005694	chromosome	C	4
isotig03490	GO:0008250	oligosaccharyltransferase complex	C	4
isotig03518	GO:0031966	mitochondrial membrane	C	4
isotig03540	GO:0016592	mediator complex	C	4
isotig03545	GO:0031305	integral to mitochondrial inner membrane	C	4
isotig03641	GO:0005681	spliceosomal complex	C	4
isotig03652	GO:0030532	small nuclear ribonucleoprotein complex	C	4
isotig03694	GO:0005793	endoplasmic reticulum-Golgi intermediate compartment	C	4
isotig03718	GO:0005747	mitochondrial respiratory chain complex I	C	4
isotig03815	GO:0030532	small nuclear ribonucleoprotein complex	C	4
isotig03968	GO:0005741	mitochondrial outer membrane	C	4
isotig04022	GO:0043232	intracellular non-membrane-bounded organelle	C	4
isotig04055	GO:0005686	U2 snRNP	C	4
isotig04077	GO:0005686	U2 snRNP	C	4
isotig04110	GO:0005839	proteasome core complex	C	4
isotig04154	GO:0005686	U2 snRNP	C	4
isotig04157	GO:0000786	nucleosome	C	4
isotig04172	GO:0016272	prefoldin complex	C	4
isotig04230	GO:0000932	cytoplasmic mRNA processing body	C	4
isotig04239	GO:0042645	mitochondrial nucleoid	C	4
isotig04246	GO:0031305	integral to mitochondrial inner membrane	C	4
isotig04283	GO:0000932	cytoplasmic mRNA processing body	C	4
isotig04417	GO:0042645	mitochondrial nucleoid	C	4
isotig00086	GO:0030132	clathrin coat of coated pit	C	5
isotig00145	GO:0005819	spindle	C	5
isotig00576	GO:0005624	membrane fraction	C	5
isotig00948	GO:0005819	spindle	C	5
isotig01100	GO:0015935	small ribosomal subunit	C	5
isotig01217	GO:0005654	nucleoplasm	C	5
isotig01249	GO:0005654	nucleoplasm	C	5
isotig01300	GO:0015935	small ribosomal subunit	C	5
isotig01446	GO:0005654	nucleoplasm	C	5
isotig01552	GO:0005905	coated pit	C	5
isotig01567	GO:0044459	plasma membrane part	C	5
isotig01717	GO:0005624	membrane fraction	C	5
isotig01843	GO:0044459	plasma membrane part	C	5
isotig01901	GO:0005819	spindle	C	5
isotig01908	GO:0005624	membrane fraction	C	5
isotig01939	GO:0005624	membrane fraction	C	5
isotig01969	GO:0044459	plasma membrane part	C	5
isotig01993	GO:0015935	small ribosomal subunit	C	5
isotig01998	GO:0015935	small ribosomal subunit	C	5
isotig02078	GO:0005654	nucleoplasm	C	5
isotig02295	GO:0005624	membrane fraction	C	5
isotig02371	GO:0005758	mitochondrial intermembrane space	C	5
isotig02415	GO:0044459	plasma membrane part	C	5
isotig02625	GO:0005905	coated pit	C	5
isotig02637	GO:0005905	coated pit	C	5
isotig02758	GO:0030132	clathrin coat of coated pit	C	5
isotig02848	GO:0030132	clathrin coat of coated pit	C	5
isotig03057	GO:0005758	mitochondrial intermembrane space	C	5
isotig03171	GO:0030132	clathrin coat of coated pit	C	5
isotig03259	GO:0005758	mitochondrial intermembrane space	C	5
isotig03411	GO:0005758	mitochondrial intermembrane space	C	5
isotig03444	GO:0044459	plasma membrane part	C	5
isotig03457	GO:0030132	clathrin coat of coated pit	C	5
isotig03552	GO:0005819	spindle	C	5
isotig03556	GO:0005654	nucleoplasm	C	5
isotig03572	GO:0005819	spindle	C	5
isotig03854	GO:0005758	mitochondrial intermembrane space	C	5
isotig03976	GO:0015935	small ribosomal subunit	C	5
isotig04013	GO:0005905	coated pit	C	5
isotig04161	GO:0005905	coated pit	C	5
isotig00170	GO:0031902	late endosome membrane	C	6
isotig00308	GO:0005938	cell cortex	C	6
isotig01059	GO:0005938	cell cortex	C	6
isotig01105	GO:0030126	COPI vesicle coat	C	6
isotig01174	GO:0005938	cell cortex	C	6
isotig01217	GO:0019773	proteasome core complex, alpha-subunit complex	C	6
isotig01249	GO:0019773	proteasome core complex, alpha-subunit complex	C	6
isotig01320	GO:0031902	late endosome membrane	C	6
isotig01374	GO:0019773	proteasome core complex, alpha-subunit complex	C	6
isotig01519	GO:0005769	early endosome	C	6
isotig01567	GO:0030131	clathrin adaptor complex	C	6
isotig01575	GO:0019717	synaptosome	C	6
isotig01588	GO:0019773	proteasome core complex, alpha-subunit complex	C	6
isotig01626	GO:0005769	early endosome	C	6
isotig01712	GO:0019773	proteasome core complex, alpha-subunit complex	C	6
isotig01783	GO:0031902	late endosome membrane	C	6
isotig01834	GO:0019717	synaptosome	C	6
isotig01835	GO:0030126	COPI vesicle coat	C	6
isotig02073	GO:0030126	COPI vesicle coat	C	6
isotig02093	GO:0005769	early endosome	C	6
isotig02135	GO:0019717	synaptosome	C	6
isotig02174	GO:0005769	early endosome	C	6
isotig02612	GO:0005938	cell cortex	C	6
isotig02637	GO:0030131	clathrin adaptor complex	C	6
isotig02763	GO:0019717	synaptosome	C	6
isotig02793	GO:0030529	ribonucleoprotein complex	C	6
isotig02848	GO:0030131	clathrin adaptor complex	C	6
isotig02993	GO:0031902	late endosome membrane	C	6
isotig03022	GO:0019717	synaptosome	C	6
isotig03107	GO:0019773	proteasome core complex, alpha-subunit complex	C	6
isotig03127	GO:0030126	COPI vesicle coat	C	6
isotig03171	GO:0030131	clathrin adaptor complex	C	6
isotig03175	GO:0030529	ribonucleoprotein complex	C	6
isotig03236	GO:0031902	late endosome membrane	C	6
isotig03365	GO:0005769	early endosome	C	6
isotig03522	GO:0030126	COPI vesicle coat	C	6
isotig03625	GO:0005938	cell cortex	C	6
isotig03721	GO:0019717	synaptosome	C	6
isotig03813	GO:0030529	ribonucleoprotein complex	C	6
isotig03827	GO:0030529	ribonucleoprotein complex	C	6
isotig03911	GO:0005938	cell cortex	C	6
isotig04013	GO:0030131	clathrin adaptor complex	C	6
isotig04161	GO:0030131	clathrin adaptor complex	C	6
isotig04192	GO:0030529	ribonucleoprotein complex	C	6
isotig04268	GO:0031902	late endosome membrane	C	6
isotig04268	GO:0005769	early endosome	C	6
isotig04296	GO:0030529	ribonucleoprotein complex	C	6
isotig04435	GO:0030126	COPI vesicle coat	C	6
isotig00308	GO:0005887	integral to plasma membrane	C	7
isotig00430	GO:0005777	peroxisome	C	7
isotig00474	GO:0015934	large ribosomal subunit	C	7
isotig00834	GO:0005777	peroxisome	C	7
isotig01239	GO:0005622	intracellular	C	7
isotig01432	GO:0022627	cytosolic small ribosomal subunit	C	7
isotig01521	GO:0015934	large ribosomal subunit	C	7
isotig01531	GO:0005852	eukaryotic translation initiation factor 3 complex	C	7
isotig01553	GO:0005852	eukaryotic translation initiation factor 3 complex	C	7
isotig01634	GO:0005887	integral to plasma membrane	C	7
isotig01709	GO:0005887	integral to plasma membrane	C	7
isotig01724	GO:0015934	large ribosomal subunit	C	7
isotig01854	GO:0005622	intracellular	C	7
isotig02081	GO:0022627	cytosolic small ribosomal subunit	C	7
isotig02119	GO:0005622	intracellular	C	7
isotig02151	GO:0005777	peroxisome	C	7
isotig02153	GO:0015934	large ribosomal subunit	C	7
isotig02198	GO:0022627	cytosolic small ribosomal subunit	C	7
isotig02222	GO:0005887	integral to plasma membrane	C	7
isotig02261	GO:0005622	intracellular	C	7
isotig02283	GO:0015934	large ribosomal subunit	C	7
isotig02342	GO:0005622	intracellular	C	7
isotig02429	GO:0022627	cytosolic small ribosomal subunit	C	7
isotig02453	GO:0005777	peroxisome	C	7
isotig02767	GO:0005852	eukaryotic translation initiation factor 3 complex	C	7
isotig02906	GO:0005887	integral to plasma membrane	C	7
isotig02925	GO:0005622	intracellular	C	7
isotig02962	GO:0005852	eukaryotic translation initiation factor 3 complex	C	7
isotig03150	GO:0005622	intracellular	C	7
isotig03285	GO:0005777	peroxisome	C	7
isotig03486	GO:0005777	peroxisome	C	7
isotig03617	GO:0005887	integral to plasma membrane	C	7
isotig03622	GO:0022627	cytosolic small ribosomal subunit	C	7
isotig03693	GO:0005887	integral to plasma membrane	C	7
isotig03833	GO:0005852	eukaryotic translation initiation factor 3 complex	C	7
isotig03837	GO:0005852	eukaryotic translation initiation factor 3 complex	C	7
isotig03846	GO:0022627	cytosolic small ribosomal subunit	C	7
isotig03868	GO:0005852	eukaryotic translation initiation factor 3 complex	C	7
isotig04196	GO:0022627	cytosolic small ribosomal subunit	C	7
isotig04228	GO:0015934	large ribosomal subunit	C	7
isotig04260	GO:0005777	peroxisome	C	7
isotig04439	GO:0015934	large ribosomal subunit	C	7
isotig00282	GO:0000139	Golgi membrane	C	8
isotig00296	GO:0043234	protein complex	C	8
isotig00314	GO:0043234	protein complex	C	8
isotig00408	GO:0000139	Golgi membrane	C	8
isotig00726	GO:0045169	fusome	C	8
isotig00894	GO:0045169	fusome	C	8
isotig01066	GO:0005768	endosome	C	8
isotig01066	GO:0031090	organelle membrane	C	8
isotig01203	GO:0045169	fusome	C	8
isotig01290	GO:0005768	endosome	C	8
isotig01416	GO:0005768	endosome	C	8
isotig01472	GO:0005768	endosome	C	8
isotig01552	GO:0000139	Golgi membrane	C	8
isotig01567	GO:0005768	endosome	C	8
isotig01597	GO:0031090	organelle membrane	C	8
isotig01726	GO:0031090	organelle membrane	C	8
isotig01744	GO:0000139	Golgi membrane	C	8
isotig01872	GO:0043234	protein complex	C	8
isotig01967	GO:0045169	fusome	C	8
isotig01968	GO:0043234	protein complex	C	8
isotig01988	GO:0043234	protein complex	C	8
isotig01989	GO:0031090	organelle membrane	C	8
isotig02112	GO:0031090	organelle membrane	C	8
isotig02126	GO:0000139	Golgi membrane	C	8
isotig02206	GO:0005768	endosome	C	8
isotig02206	GO:0031090	organelle membrane	C	8
isotig02340	GO:0045169	fusome	C	8
isotig02341	GO:0045169	fusome	C	8
isotig02505	GO:0045169	fusome	C	8
isotig02580	GO:0005768	endosome	C	8
isotig02580	GO:0031090	organelle membrane	C	8
isotig02673	GO:0000139	Golgi membrane	C	8
isotig02843	GO:0045169	fusome	C	8
isotig02906	GO:0043234	protein complex	C	8
isotig03337	GO:0031090	organelle membrane	C	8
isotig03455	GO:0043234	protein complex	C	8
isotig03968	GO:0000139	Golgi membrane	C	8
isotig04134	GO:0005768	endosome	C	8
isotig04154	GO:0043234	protein complex	C	8
isotig04190	GO:0000139	Golgi membrane	C	8
isotig00296	GO:0015629	actin cytoskeleton	C	9
isotig00322	GO:0015629	actin cytoskeleton	C	9
isotig00408	GO:0015629	actin cytoskeleton	C	9
isotig00830	GO:0005788	endoplasmic reticulum lumen	C	9
isotig00912	GO:0015629	actin cytoskeleton	C	9
isotig00960	GO:0016607	nuclear speck	C	9
isotig01021	GO:0016607	nuclear speck	C	9
isotig01086	GO:0005788	endoplasmic reticulum lumen	C	9
isotig01139	GO:0005788	endoplasmic reticulum lumen	C	9
isotig01527	GO:0016607	nuclear speck	C	9
isotig01668	GO:0005615	extracellular space	C	9
isotig01692	GO:0015629	actin cytoskeleton	C	9
isotig01717	GO:0005615	extracellular space	C	9
isotig01757	GO:0005615	extracellular space	C	9
isotig01831	GO:0016607	nuclear speck	C	9
isotig01952	GO:0015629	actin cytoskeleton	C	9
isotig01967	GO:0005615	extracellular space	C	9
isotig01967	GO:0005788	endoplasmic reticulum lumen	C	9
isotig02341	GO:0005615	extracellular space	C	9
isotig02341	GO:0005788	endoplasmic reticulum lumen	C	9
isotig02565	GO:0015629	actin cytoskeleton	C	9
isotig02590	GO:0005615	extracellular space	C	9
isotig02662	GO:0016607	nuclear speck	C	9
isotig02714	GO:0015629	actin cytoskeleton	C	9
isotig02773	GO:0005788	endoplasmic reticulum lumen	C	9
isotig02845	GO:0015629	actin cytoskeleton	C	9
isotig03297	GO:0005615	extracellular space	C	9
isotig03334	GO:0005788	endoplasmic reticulum lumen	C	9
isotig03512	GO:0005615	extracellular space	C	9
isotig03694	GO:0005788	endoplasmic reticulum lumen	C	9
isotig03761	GO:0005615	extracellular space	C	9
isotig04011	GO:0016607	nuclear speck	C	9
isotig04055	GO:0016607	nuclear speck	C	9
isotig04170	GO:0005788	endoplasmic reticulum lumen	C	9
isotig04213	GO:0016607	nuclear speck	C	9
isotig04419	GO:0016607	nuclear speck	C	9
isotig00135	GO:0005813	centrosome	C	10
isotig00140	GO:0005813	centrosome	C	10
isotig00430	GO:0005792	microsome	C	10
isotig00606	GO:0043229	intracellular organelle	C	10
isotig00721	GO:0005813	centrosome	C	10
isotig00773	GO:0005792	microsome	C	10
isotig00780	GO:0043229	intracellular organelle	C	10
isotig00802	GO:0070469	respiratory chain	C	10
isotig00823	GO:0070469	respiratory chain	C	10
isotig00918	GO:0005813	centrosome	C	10
isotig00988	GO:0070469	respiratory chain	C	10
isotig01035	GO:0070469	respiratory chain	C	10
isotig01045	GO:0005813	centrosome	C	10
isotig01066	GO:0044446	intracellular organelle part	C	10
isotig01217	GO:0005813	centrosome	C	10
isotig01246	GO:0043229	intracellular organelle	C	10
isotig01261	GO:0070469	respiratory chain	C	10
isotig01291	GO:0044446	intracellular organelle part	C	10
isotig01363	GO:0070469	respiratory chain	C	10
isotig01500	GO:0070469	respiratory chain	C	10
isotig01548	GO:0005813	centrosome	C	10
isotig01573	GO:0044446	intracellular organelle part	C	10
isotig01597	GO:0005792	microsome	C	10
isotig01597	GO:0044446	intracellular organelle part	C	10
isotig01726	GO:0044446	intracellular organelle part	C	10
isotig01755	GO:0005792	microsome	C	10
isotig01776	GO:0005792	microsome	C	10
isotig01794	GO:0044446	intracellular organelle part	C	10
isotig01968	GO:0043229	intracellular organelle	C	10
isotig02179	GO:0044446	intracellular organelle part	C	10
isotig02430	GO:0043229	intracellular organelle	C	10
isotig02446	GO:0043229	intracellular organelle	C	10
isotig02580	GO:0044446	intracellular organelle part	C	10
isotig02601	GO:0044446	intracellular organelle part	C	10
isotig02678	GO:0005792	microsome	C	10
isotig02713	GO:0070469	respiratory chain	C	10
isotig02906	GO:0005792	microsome	C	10
isotig03022	GO:0043229	intracellular organelle	C	10
isotig03077	GO:0043229	intracellular organelle	C	10
isotig03142	GO:0005813	centrosome	C	10
isotig03323	GO:0005792	microsome	C	10
isotig03337	GO:0044446	intracellular organelle part	C	10
isotig03392	GO:0043229	intracellular organelle	C	10
isotig03433	GO:0005792	microsome	C	10
isotig03491	GO:0005813	centrosome	C	10
isotig03518	GO:0070469	respiratory chain	C	10
isotig03572	GO:0005813	centrosome	C	10
isotig03661	GO:0005792	microsome	C	10
isotig03854	GO:0070469	respiratory chain	C	10
isotig04184	GO:0043229	intracellular organelle	C	10
isotig00329	GO:0005856	cytoskeleton	C	11
isotig00408	GO:0005874	microtubule	C	11
isotig00426	GO:0043025	neuronal cell body	C	11
isotig00775	GO:0005874	microtubule	C	11
isotig00788	GO:0043025	neuronal cell body	C	11
isotig00809	GO:0005856	cytoskeleton	C	11
isotig00826	GO:0005856	cytoskeleton	C	11
isotig00829	GO:0005874	microtubule	C	11
isotig00896	GO:0005856	cytoskeleton	C	11
isotig00948	GO:0005874	microtubule	C	11
isotig01044	GO:0005856	cytoskeleton	C	11
isotig01045	GO:0005874	microtubule	C	11
isotig01052	GO:0043025	neuronal cell body	C	11
isotig01059	GO:0005856	cytoskeleton	C	11
isotig01220	GO:0005856	cytoskeleton	C	11
isotig01548	GO:0005874	microtubule	C	11
isotig01688	GO:0005874	microtubule	C	11
isotig01745	GO:0043025	neuronal cell body	C	11
isotig01785	GO:0005856	cytoskeleton	C	11
isotig01830	GO:0043025	neuronal cell body	C	11
isotig01967	GO:0043025	neuronal cell body	C	11
isotig01988	GO:0043025	neuronal cell body	C	11
isotig02179	GO:0005856	cytoskeleton	C	11
isotig02276	GO:0005856	cytoskeleton	C	11
isotig02341	GO:0043025	neuronal cell body	C	11
isotig02531	GO:0005874	microtubule	C	11
isotig02571	GO:0043025	neuronal cell body	C	11
isotig02939	GO:0043025	neuronal cell body	C	11
isotig02991	GO:0005874	microtubule	C	11
isotig03128	GO:0005874	microtubule	C	11
isotig03625	GO:0005856	cytoskeleton	C	11
isotig03626	GO:0005874	microtubule	C	11
isotig03968	GO:0043025	neuronal cell body	C	11
isotig00430	GO:0005625	soluble fraction	C	12
isotig00616	GO:0005625	soluble fraction	C	12
isotig00834	GO:0005625	soluble fraction	C	12
isotig00882	GO:0005625	soluble fraction	C	12
isotig01067	GO:0000502	proteasome complex	C	12
isotig01102	GO:0000502	proteasome complex	C	12
isotig01203	GO:0000502	proteasome complex	C	12
isotig01447	GO:0005625	soluble fraction	C	12
isotig01522	GO:0005625	soluble fraction	C	12
isotig01631	GO:0000502	proteasome complex	C	12
isotig01799	GO:0000502	proteasome complex	C	12
isotig01827	GO:0005625	soluble fraction	C	12
isotig02190	GO:0005625	soluble fraction	C	12
isotig02340	GO:0000502	proteasome complex	C	12
isotig02903	GO:0000502	proteasome complex	C	12
isotig03022	GO:0005625	soluble fraction	C	12
isotig03183	GO:0000502	proteasome complex	C	12
isotig03437	GO:0005625	soluble fraction	C	12
isotig03505	GO:0000502	proteasome complex	C	12
isotig03541	GO:0000502	proteasome complex	C	12
isotig03571	GO:0005625	soluble fraction	C	12
isotig03884	GO:0000502	proteasome complex	C	12
isotig03968	GO:0005625	soluble fraction	C	12
isotig04056	GO:0000502	proteasome complex	C	12
isotig00408	GO:0005764	lysosome	C	13
isotig00821	GO:0005764	lysosome	C	13
isotig00870	GO:0005764	lysosome	C	13
isotig00894	GO:0005764	lysosome	C	13
isotig01066	GO:0005764	lysosome	C	13
isotig01472	GO:0005764	lysosome	C	13
isotig01697	GO:0005764	lysosome	C	13
isotig01794	GO:0005764	lysosome	C	13
isotig02450	GO:0005764	lysosome	C	13
isotig02882	GO:0005764	lysosome	C	13
isotig03428	GO:0005764	lysosome	C	13
isotig03968	GO:0005764	lysosome	C	13
isotig04268	GO:0005764	lysosome	C	13
isotig00372	GO:0048471	perinuclear region of cytoplasm	C	14
isotig00408	GO:0048471	perinuclear region of cytoplasm	C	14
isotig00426	GO:0022625	cytosolic large ribosomal subunit	C	14
isotig00552	GO:0071011	precatalytic spliceosome	C	14
isotig00682	GO:0048471	perinuclear region of cytoplasm	C	14
isotig00919	GO:0071011	precatalytic spliceosome	C	14
isotig01023	GO:0022625	cytosolic large ribosomal subunit	C	14
isotig01077	GO:0048471	perinuclear region of cytoplasm	C	14
isotig01174	GO:0048471	perinuclear region of cytoplasm	C	14
isotig01218	GO:0022625	cytosolic large ribosomal subunit	C	14
isotig01529	GO:0071011	precatalytic spliceosome	C	14
isotig01537	GO:0022625	cytosolic large ribosomal subunit	C	14
isotig01745	GO:0022625	cytosolic large ribosomal subunit	C	14
isotig01967	GO:0048471	perinuclear region of cytoplasm	C	14
isotig02114	GO:0071011	precatalytic spliceosome	C	14
isotig02208	GO:0022625	cytosolic large ribosomal subunit	C	14
isotig02231	GO:0022625	cytosolic large ribosomal subunit	C	14
isotig02298	GO:0071011	precatalytic spliceosome	C	14
isotig02341	GO:0048471	perinuclear region of cytoplasm	C	14
isotig02425	GO:0048471	perinuclear region of cytoplasm	C	14
isotig02460	GO:0048471	perinuclear region of cytoplasm	C	14
isotig02596	GO:0022625	cytosolic large ribosomal subunit	C	14
isotig02635	GO:0048471	perinuclear region of cytoplasm	C	14
isotig02670	GO:0071011	precatalytic spliceosome	C	14
isotig02672	GO:0071011	precatalytic spliceosome	C	14
isotig02758	GO:0048471	perinuclear region of cytoplasm	C	14
isotig02774	GO:0071011	precatalytic spliceosome	C	14
isotig03007	GO:0048471	perinuclear region of cytoplasm	C	14
isotig03010	GO:0022625	cytosolic large ribosomal subunit	C	14
isotig03052	GO:0071011	precatalytic spliceosome	C	14
isotig03053	GO:0022625	cytosolic large ribosomal subunit	C	14
isotig03372	GO:0022625	cytosolic large ribosomal subunit	C	14
isotig03457	GO:0048471	perinuclear region of cytoplasm	C	14
isotig03497	GO:0022625	cytosolic large ribosomal subunit	C	14
isotig03532	GO:0022625	cytosolic large ribosomal subunit	C	14
isotig03548	GO:0022625	cytosolic large ribosomal subunit	C	14
isotig03652	GO:0071011	precatalytic spliceosome	C	14
isotig03815	GO:0071011	precatalytic spliceosome	C	14
isotig04077	GO:0071011	precatalytic spliceosome	C	14
isotig04124	GO:0048471	perinuclear region of cytoplasm	C	14
isotig04154	GO:0071011	precatalytic spliceosome	C	14
isotig04306	GO:0071011	precatalytic spliceosome	C	14
isotig00552	GO:0071013	catalytic step 2 spliceosome	C	16
isotig00919	GO:0071013	catalytic step 2 spliceosome	C	16
isotig01527	GO:0071013	catalytic step 2 spliceosome	C	16
isotig01529	GO:0071013	catalytic step 2 spliceosome	C	16
isotig01831	GO:0071013	catalytic step 2 spliceosome	C	16
isotig02114	GO:0071013	catalytic step 2 spliceosome	C	16
isotig02298	GO:0071013	catalytic step 2 spliceosome	C	16
isotig02672	GO:0071013	catalytic step 2 spliceosome	C	16
isotig02774	GO:0071013	catalytic step 2 spliceosome	C	16
isotig03052	GO:0071013	catalytic step 2 spliceosome	C	16
isotig03652	GO:0071013	catalytic step 2 spliceosome	C	16
isotig03722	GO:0071013	catalytic step 2 spliceosome	C	16
isotig03815	GO:0071013	catalytic step 2 spliceosome	C	16
isotig04011	GO:0071013	catalytic step 2 spliceosome	C	16
isotig04154	GO:0071013	catalytic step 2 spliceosome	C	16
isotig04306	GO:0071013	catalytic step 2 spliceosome	C	16
isotig00282	GO:0005789	endoplasmic reticulum membrane	C	18
isotig00388	GO:0005789	endoplasmic reticulum membrane	C	18
isotig00430	GO:0005789	endoplasmic reticulum membrane	C	18
isotig00883	GO:0005789	endoplasmic reticulum membrane	C	18
isotig01602	GO:0005789	endoplasmic reticulum membrane	C	18
isotig01613	GO:0005789	endoplasmic reticulum membrane	C	18
isotig01776	GO:0005789	endoplasmic reticulum membrane	C	18
isotig01833	GO:0005789	endoplasmic reticulum membrane	C	18
isotig01964	GO:0005789	endoplasmic reticulum membrane	C	18
isotig02126	GO:0005789	endoplasmic reticulum membrane	C	18
isotig02235	GO:0005789	endoplasmic reticulum membrane	C	18
isotig02505	GO:0005789	endoplasmic reticulum membrane	C	18
isotig02635	GO:0005789	endoplasmic reticulum membrane	C	18
isotig02843	GO:0005789	endoplasmic reticulum membrane	C	18
isotig02993	GO:0005789	endoplasmic reticulum membrane	C	18
isotig03185	GO:0005789	endoplasmic reticulum membrane	C	18
isotig03694	GO:0005789	endoplasmic reticulum membrane	C	18
isotig03968	GO:0005789	endoplasmic reticulum membrane	C	18
isotig00186	GO:0044464	cell part	C	22
isotig00386	GO:0005576	extracellular region	C	22
isotig00424	GO:0005576	extracellular region	C	22
isotig00747	GO:0044464	cell part	C	22
isotig00777	GO:0044464	cell part	C	22
isotig01009	GO:0005576	extracellular region	C	22
isotig01186	GO:0044464	cell part	C	22
isotig01209	GO:0044464	cell part	C	22
isotig01254	GO:0005576	extracellular region	C	22
isotig01296	GO:0044464	cell part	C	22
isotig01484	GO:0044464	cell part	C	22
isotig01487	GO:0005576	extracellular region	C	22
isotig01575	GO:0005576	extracellular region	C	22
isotig01582	GO:0044464	cell part	C	22
isotig01672	GO:0005576	extracellular region	C	22
isotig01764	GO:0005576	extracellular region	C	22
isotig01773	GO:0044464	cell part	C	22
isotig01789	GO:0044464	cell part	C	22
isotig01808	GO:0044464	cell part	C	22
isotig01812	GO:0044464	cell part	C	22
isotig01979	GO:0005576	extracellular region	C	22
isotig02237	GO:0005576	extracellular region	C	22
isotig02243	GO:0005576	extracellular region	C	22
isotig02247	GO:0005576	extracellular region	C	22
isotig02264	GO:0044464	cell part	C	22
isotig02581	GO:0044464	cell part	C	22
isotig02583	GO:0044464	cell part	C	22
isotig02594	GO:0005576	extracellular region	C	22
isotig02832	GO:0005576	extracellular region	C	22
isotig02882	GO:0005576	extracellular region	C	22
isotig02944	GO:0005576	extracellular region	C	22
isotig02972	GO:0044464	cell part	C	22
isotig03078	GO:0044464	cell part	C	22
isotig03092	GO:0005576	extracellular region	C	22
isotig03330	GO:0044464	cell part	C	22
isotig03379	GO:0044464	cell part	C	22
isotig03582	GO:0005576	extracellular region	C	22
isotig03588	GO:0005576	extracellular region	C	22
isotig03602	GO:0044464	cell part	C	22
isotig03620	GO:0005576	extracellular region	C	22
isotig03709	GO:0044464	cell part	C	22
isotig03820	GO:0005576	extracellular region	C	22
isotig03933	GO:0044464	cell part	C	22
isotig04026	GO:0005576	extracellular region	C	22
isotig00207	GO:0005875	microtubule associated complex	C	23
isotig00207	GO:0005759	mitochondrial matrix	C	23
isotig00308	GO:0005794	Golgi apparatus	C	23
isotig00408	GO:0005875	microtubule associated complex	C	23
isotig00552	GO:0005875	microtubule associated complex	C	23
isotig00622	GO:0044424	intracellular part	C	23
isotig00711	GO:0044424	intracellular part	C	23
isotig00778	GO:0005759	mitochondrial matrix	C	23
isotig00789	GO:0005794	Golgi apparatus	C	23
isotig00791	GO:0005759	mitochondrial matrix	C	23
isotig00805	GO:0005759	mitochondrial matrix	C	23
isotig00855	GO:0005759	mitochondrial matrix	C	23
isotig00858	GO:0005794	Golgi apparatus	C	23
isotig00919	GO:0005875	microtubule associated complex	C	23
isotig01005	GO:0005759	mitochondrial matrix	C	23
isotig01062	GO:0005794	Golgi apparatus	C	23
isotig01084	GO:0005759	mitochondrial matrix	C	23
isotig01087	GO:0005794	Golgi apparatus	C	23
isotig01098	GO:0005875	microtubule associated complex	C	23
isotig01112	GO:0005759	mitochondrial matrix	C	23
isotig01154	GO:0005759	mitochondrial matrix	C	23
isotig01169	GO:0005759	mitochondrial matrix	C	23
isotig01203	GO:0005875	microtubule associated complex	C	23
isotig01247	GO:0005875	microtubule associated complex	C	23
isotig01267	GO:0005875	microtubule associated complex	C	23
isotig01278	GO:0005875	microtubule associated complex	C	23
isotig01295	GO:0044424	intracellular part	C	23
isotig01327	GO:0005875	microtubule associated complex	C	23
isotig01339	GO:0005794	Golgi apparatus	C	23
isotig01393	GO:0005794	Golgi apparatus	C	23
isotig01408	GO:0005759	mitochondrial matrix	C	23
isotig01450	GO:0044424	intracellular part	C	23
isotig01463	GO:0005875	microtubule associated complex	C	23
isotig01492	GO:0044424	intracellular part	C	23
isotig01503	GO:0044424	intracellular part	C	23
isotig01510	GO:0044424	intracellular part	C	23
isotig01597	GO:0005794	Golgi apparatus	C	23
isotig01627	GO:0044424	intracellular part	C	23
isotig01639	GO:0005875	microtubule associated complex	C	23
isotig01698	GO:0044424	intracellular part	C	23
isotig01725	GO:0005875	microtubule associated complex	C	23
isotig01752	GO:0044424	intracellular part	C	23
isotig01754	GO:0005759	mitochondrial matrix	C	23
isotig01757	GO:0005794	Golgi apparatus	C	23
isotig01910	GO:0005759	mitochondrial matrix	C	23
isotig01920	GO:0044424	intracellular part	C	23
isotig01926	GO:0005875	microtubule associated complex	C	23
isotig01935	GO:0005759	mitochondrial matrix	C	23
isotig01939	GO:0005794	Golgi apparatus	C	23
isotig01948	GO:0005875	microtubule associated complex	C	23
isotig01977	GO:0005759	mitochondrial matrix	C	23
isotig02003	GO:0005875	microtubule associated complex	C	23
isotig02017	GO:0005794	Golgi apparatus	C	23
isotig02093	GO:0005794	Golgi apparatus	C	23
isotig02115	GO:0005759	mitochondrial matrix	C	23
isotig02223	GO:0044424	intracellular part	C	23
isotig02242	GO:0005794	Golgi apparatus	C	23
isotig02340	GO:0005875	microtubule associated complex	C	23
isotig02377	GO:0005759	mitochondrial matrix	C	23
isotig02386	GO:0005875	microtubule associated complex	C	23
isotig02460	GO:0005794	Golgi apparatus	C	23
isotig02495	GO:0044424	intracellular part	C	23
isotig02529	GO:0044424	intracellular part	C	23
isotig02532	GO:0005794	Golgi apparatus	C	23
isotig02580	GO:0005794	Golgi apparatus	C	23
isotig02589	GO:0044424	intracellular part	C	23
isotig02630	GO:0044424	intracellular part	C	23
isotig02635	GO:0005794	Golgi apparatus	C	23
isotig02637	GO:0005794	Golgi apparatus	C	23
isotig02713	GO:0005759	mitochondrial matrix	C	23
isotig02783	GO:0005794	Golgi apparatus	C	23
isotig02802	GO:0005759	mitochondrial matrix	C	23
isotig02805	GO:0005875	microtubule associated complex	C	23
isotig02855	GO:0005794	Golgi apparatus	C	23
isotig02866	GO:0005875	microtubule associated complex	C	23
isotig02894	GO:0044424	intracellular part	C	23
isotig02951	GO:0044424	intracellular part	C	23
isotig02953	GO:0044424	intracellular part	C	23
isotig03052	GO:0005875	microtubule associated complex	C	23
isotig03103	GO:0005759	mitochondrial matrix	C	23
isotig03242	GO:0044424	intracellular part	C	23
isotig03337	GO:0005794	Golgi apparatus	C	23
isotig03415	GO:0044424	intracellular part	C	23
isotig03564	GO:0005875	microtubule associated complex	C	23
isotig03571	GO:0005759	mitochondrial matrix	C	23
isotig03693	GO:0005794	Golgi apparatus	C	23
isotig03724	GO:0005759	mitochondrial matrix	C	23
isotig03825	GO:0044424	intracellular part	C	23
isotig03829	GO:0044424	intracellular part	C	23
isotig04124	GO:0005794	Golgi apparatus	C	23
isotig04137	GO:0005759	mitochondrial matrix	C	23
isotig04446	GO:0005875	microtubule associated complex	C	23
isotig00316	GO:0044425	membrane part	C	24
isotig00370	GO:0044425	membrane part	C	24
isotig00576	GO:0044425	membrane part	C	24
isotig00848	GO:0044425	membrane part	C	24
isotig01024	GO:0044425	membrane part	C	24
isotig01033	GO:0044425	membrane part	C	24
isotig01296	GO:0044425	membrane part	C	24
isotig01315	GO:0044425	membrane part	C	24
isotig01540	GO:0044425	membrane part	C	24
isotig01551	GO:0044425	membrane part	C	24
isotig01832	GO:0044425	membrane part	C	24
isotig01955	GO:0044425	membrane part	C	24
isotig02008	GO:0044425	membrane part	C	24
isotig02164	GO:0044425	membrane part	C	24
isotig02660	GO:0044425	membrane part	C	24
isotig02940	GO:0044425	membrane part	C	24
isotig02952	GO:0044425	membrane part	C	24
isotig03135	GO:0044425	membrane part	C	24
isotig03195	GO:0044425	membrane part	C	24
isotig03337	GO:0044425	membrane part	C	24
isotig03353	GO:0044425	membrane part	C	24
isotig03755	GO:0044425	membrane part	C	24
isotig03991	GO:0044425	membrane part	C	24
isotig04134	GO:0044425	membrane part	C	24
isotig00207	GO:0005811	lipid particle	C	27
isotig00426	GO:0005811	lipid particle	C	27
isotig00721	GO:0005811	lipid particle	C	27
isotig01023	GO:0005811	lipid particle	C	27
isotig01098	GO:0005811	lipid particle	C	27
isotig01203	GO:0005811	lipid particle	C	27
isotig01327	GO:0005811	lipid particle	C	27
isotig01537	GO:0005811	lipid particle	C	27
isotig01709	GO:0005811	lipid particle	C	27
isotig01745	GO:0005811	lipid particle	C	27
isotig01755	GO:0005811	lipid particle	C	27
isotig01967	GO:0005811	lipid particle	C	27
isotig02152	GO:0005811	lipid particle	C	27
isotig02340	GO:0005811	lipid particle	C	27
isotig02341	GO:0005811	lipid particle	C	27
isotig02566	GO:0005811	lipid particle	C	27
isotig02576	GO:0005811	lipid particle	C	27
isotig02635	GO:0005811	lipid particle	C	27
isotig02758	GO:0005811	lipid particle	C	27
isotig03010	GO:0005811	lipid particle	C	27
isotig03053	GO:0005811	lipid particle	C	27
isotig03272	GO:0005811	lipid particle	C	27
isotig03457	GO:0005811	lipid particle	C	27
isotig03548	GO:0005811	lipid particle	C	27
isotig03622	GO:0005811	lipid particle	C	27
isotig03744	GO:0005811	lipid particle	C	27
isotig03846	GO:0005811	lipid particle	C	27
isotig00408	GO:0005886	plasma membrane	C	28
isotig00576	GO:0005886	plasma membrane	C	28
isotig00682	GO:0005886	plasma membrane	C	28
isotig00985	GO:0005886	plasma membrane	C	28
isotig01017	GO:0005886	plasma membrane	C	28
isotig01044	GO:0005886	plasma membrane	C	28
isotig01118	GO:0005886	plasma membrane	C	28
isotig01131	GO:0005886	plasma membrane	C	28
isotig01239	GO:0005886	plasma membrane	C	28
isotig01613	GO:0005886	plasma membrane	C	28
isotig01668	GO:0005886	plasma membrane	C	28
isotig01823	GO:0005886	plasma membrane	C	28
isotig02091	GO:0005886	plasma membrane	C	28
isotig02450	GO:0005886	plasma membrane	C	28
isotig02458	GO:0005886	plasma membrane	C	28
isotig02553	GO:0005886	plasma membrane	C	28
isotig02584	GO:0005886	plasma membrane	C	28
isotig02625	GO:0005886	plasma membrane	C	28
isotig02637	GO:0005886	plasma membrane	C	28
isotig02763	GO:0005886	plasma membrane	C	28
isotig03121	GO:0005886	plasma membrane	C	28
isotig03397	GO:0005886	plasma membrane	C	28
isotig03490	GO:0005886	plasma membrane	C	28
isotig03724	GO:0005886	plasma membrane	C	28
isotig04013	GO:0005886	plasma membrane	C	28
isotig04048	GO:0005886	plasma membrane	C	28
isotig04134	GO:0005886	plasma membrane	C	28
isotig04161	GO:0005886	plasma membrane	C	28
isotig00314	GO:0044444	cytoplasmic part	C	31
isotig00956	GO:0044444	cytoplasmic part	C	31
isotig01006	GO:0044444	cytoplasmic part	C	31
isotig01009	GO:0044444	cytoplasmic part	C	31
isotig01054	GO:0044444	cytoplasmic part	C	31
isotig01200	GO:0044444	cytoplasmic part	C	31
isotig01246	GO:0044444	cytoplasmic part	C	31
isotig01255	GO:0044444	cytoplasmic part	C	31
isotig01260	GO:0044444	cytoplasmic part	C	31
isotig01291	GO:0044444	cytoplasmic part	C	31
isotig01508	GO:0044444	cytoplasmic part	C	31
isotig01586	GO:0044444	cytoplasmic part	C	31
isotig01601	GO:0044444	cytoplasmic part	C	31
isotig01726	GO:0044444	cytoplasmic part	C	31
isotig01976	GO:0044444	cytoplasmic part	C	31
isotig01989	GO:0044444	cytoplasmic part	C	31
isotig02112	GO:0044444	cytoplasmic part	C	31
isotig02222	GO:0044444	cytoplasmic part	C	31
isotig02243	GO:0044444	cytoplasmic part	C	31
isotig02308	GO:0044444	cytoplasmic part	C	31
isotig02365	GO:0044444	cytoplasmic part	C	31
isotig02466	GO:0044444	cytoplasmic part	C	31
isotig02573	GO:0044444	cytoplasmic part	C	31
isotig02595	GO:0044444	cytoplasmic part	C	31
isotig02660	GO:0044444	cytoplasmic part	C	31
isotig02714	GO:0044444	cytoplasmic part	C	31
isotig02770	GO:0044444	cytoplasmic part	C	31
isotig02832	GO:0044444	cytoplasmic part	C	31
isotig03109	GO:0044444	cytoplasmic part	C	31
isotig03399	GO:0044444	cytoplasmic part	C	31
isotig03777	GO:0044444	cytoplasmic part	C	31
isotig00618	GO:0043231	intracellular membrane-bounded organelle	C	32
isotig00956	GO:0043231	intracellular membrane-bounded organelle	C	32
isotig01006	GO:0043231	intracellular membrane-bounded organelle	C	32
isotig01054	GO:0043231	intracellular membrane-bounded organelle	C	32
isotig01200	GO:0043231	intracellular membrane-bounded organelle	C	32
isotig01220	GO:0043231	intracellular membrane-bounded organelle	C	32
isotig01255	GO:0043231	intracellular membrane-bounded organelle	C	32
isotig01260	GO:0043231	intracellular membrane-bounded organelle	C	32
isotig01291	GO:0043231	intracellular membrane-bounded organelle	C	32
isotig01456	GO:0043231	intracellular membrane-bounded organelle	C	32
isotig01590	GO:0043231	intracellular membrane-bounded organelle	C	32
isotig01601	GO:0043231	intracellular membrane-bounded organelle	C	32
isotig01726	GO:0043231	intracellular membrane-bounded organelle	C	32
isotig01875	GO:0043231	intracellular membrane-bounded organelle	C	32
isotig01976	GO:0043231	intracellular membrane-bounded organelle	C	32
isotig02085	GO:0043231	intracellular membrane-bounded organelle	C	32
isotig02112	GO:0043231	intracellular membrane-bounded organelle	C	32
isotig02139	GO:0043231	intracellular membrane-bounded organelle	C	32
isotig02222	GO:0043231	intracellular membrane-bounded organelle	C	32
isotig02243	GO:0043231	intracellular membrane-bounded organelle	C	32
isotig02365	GO:0043231	intracellular membrane-bounded organelle	C	32
isotig02573	GO:0043231	intracellular membrane-bounded organelle	C	32
isotig02595	GO:0043231	intracellular membrane-bounded organelle	C	32
isotig02660	GO:0043231	intracellular membrane-bounded organelle	C	32
isotig02714	GO:0043231	intracellular membrane-bounded organelle	C	32
isotig02832	GO:0043231	intracellular membrane-bounded organelle	C	32
isotig03109	GO:0043231	intracellular membrane-bounded organelle	C	32
isotig03198	GO:0043231	intracellular membrane-bounded organelle	C	32
isotig03326	GO:0043231	intracellular membrane-bounded organelle	C	32
isotig03653	GO:0043231	intracellular membrane-bounded organelle	C	32
isotig03777	GO:0043231	intracellular membrane-bounded organelle	C	32
isotig04411	GO:0043231	intracellular membrane-bounded organelle	C	32
isotig00761	GO:0005743	mitochondrial inner membrane	C	37
isotig00802	GO:0005743	mitochondrial inner membrane	C	37
isotig00823	GO:0005743	mitochondrial inner membrane	C	37
isotig00828	GO:0005743	mitochondrial inner membrane	C	37
isotig00931	GO:0005743	mitochondrial inner membrane	C	37
isotig00988	GO:0005743	mitochondrial inner membrane	C	37
isotig01022	GO:0005743	mitochondrial inner membrane	C	37
isotig01035	GO:0005743	mitochondrial inner membrane	C	37
isotig01084	GO:0005743	mitochondrial inner membrane	C	37
isotig01181	GO:0005743	mitochondrial inner membrane	C	37
isotig01261	GO:0005743	mitochondrial inner membrane	C	37
isotig01275	GO:0005743	mitochondrial inner membrane	C	37
isotig01363	GO:0005743	mitochondrial inner membrane	C	37
isotig01400	GO:0005743	mitochondrial inner membrane	C	37
isotig01461	GO:0005743	mitochondrial inner membrane	C	37
isotig01500	GO:0005743	mitochondrial inner membrane	C	37
isotig01520	GO:0005743	mitochondrial inner membrane	C	37
isotig01670	GO:0005743	mitochondrial inner membrane	C	37
isotig01754	GO:0005743	mitochondrial inner membrane	C	37
isotig01832	GO:0005743	mitochondrial inner membrane	C	37
isotig01841	GO:0005743	mitochondrial inner membrane	C	37
isotig02164	GO:0005743	mitochondrial inner membrane	C	37
isotig02238	GO:0005743	mitochondrial inner membrane	C	37
isotig02462	GO:0005743	mitochondrial inner membrane	C	37
isotig02499	GO:0005743	mitochondrial inner membrane	C	37
isotig02520	GO:0005743	mitochondrial inner membrane	C	37
isotig02740	GO:0005743	mitochondrial inner membrane	C	37
isotig03091	GO:0005743	mitochondrial inner membrane	C	37
isotig03157	GO:0005743	mitochondrial inner membrane	C	37
isotig03195	GO:0005743	mitochondrial inner membrane	C	37
isotig03286	GO:0005743	mitochondrial inner membrane	C	37
isotig03323	GO:0005743	mitochondrial inner membrane	C	37
isotig03645	GO:0005743	mitochondrial inner membrane	C	37
isotig03704	GO:0005743	mitochondrial inner membrane	C	37
isotig04018	GO:0005743	mitochondrial inner membrane	C	37
isotig04137	GO:0005743	mitochondrial inner membrane	C	37
isotig04164	GO:0005743	mitochondrial inner membrane	C	37
isotig00308	GO:0005783	endoplasmic reticulum	C	42
isotig00464	GO:0005783	endoplasmic reticulum	C	42
isotig00544	GO:0005783	endoplasmic reticulum	C	42
isotig00664	GO:0005730	nucleolus	C	42
isotig00848	GO:0005783	endoplasmic reticulum	C	42
isotig00855	GO:0005730	nucleolus	C	42
isotig00947	GO:0005730	nucleolus	C	42
isotig00975	GO:0005730	nucleolus	C	42
isotig01024	GO:0005783	endoplasmic reticulum	C	42
isotig01045	GO:0005730	nucleolus	C	42
isotig01062	GO:0005783	endoplasmic reticulum	C	42
isotig01077	GO:0005783	endoplasmic reticulum	C	42
isotig01141	GO:0005730	nucleolus	C	42
isotig01155	GO:0005783	endoplasmic reticulum	C	42
isotig01171	GO:0005783	endoplasmic reticulum	C	42
isotig01181	GO:0005730	nucleolus	C	42
isotig01203	GO:0005783	endoplasmic reticulum	C	42
isotig01217	GO:0005730	nucleolus	C	42
isotig01315	GO:0005783	endoplasmic reticulum	C	42
isotig01372	GO:0005730	nucleolus	C	42
isotig01393	GO:0005783	endoplasmic reticulum	C	42
isotig01446	GO:0005730	nucleolus	C	42
isotig01540	GO:0005783	endoplasmic reticulum	C	42
isotig01551	GO:0005783	endoplasmic reticulum	C	42
isotig01575	GO:0005783	endoplasmic reticulum	C	42
isotig01597	GO:0005783	endoplasmic reticulum	C	42
isotig01621	GO:0005783	endoplasmic reticulum	C	42
isotig01767	GO:0005783	endoplasmic reticulum	C	42
isotig01792	GO:0005730	nucleolus	C	42
isotig01800	GO:0005730	nucleolus	C	42
isotig01807	GO:0005783	endoplasmic reticulum	C	42
isotig01852	GO:0005783	endoplasmic reticulum	C	42
isotig01867	GO:0005730	nucleolus	C	42
isotig01955	GO:0005783	endoplasmic reticulum	C	42
isotig02008	GO:0005783	endoplasmic reticulum	C	42
isotig02073	GO:0005783	endoplasmic reticulum	C	42
isotig02095	GO:0005783	endoplasmic reticulum	C	42
isotig02097	GO:0005730	nucleolus	C	42
isotig02206	GO:0005730	nucleolus	C	42
isotig02221	GO:0005730	nucleolus	C	42
isotig02233	GO:0005783	endoplasmic reticulum	C	42
isotig02340	GO:0005783	endoplasmic reticulum	C	42
isotig02362	GO:0005730	nucleolus	C	42
isotig02397	GO:0005730	nucleolus	C	42
isotig02397	GO:0005783	endoplasmic reticulum	C	42
isotig02460	GO:0005783	endoplasmic reticulum	C	42
isotig02525	GO:0005730	nucleolus	C	42
isotig02538	GO:0005730	nucleolus	C	42
isotig02584	GO:0005730	nucleolus	C	42
isotig02587	GO:0005783	endoplasmic reticulum	C	42
isotig02632	GO:0005730	nucleolus	C	42
isotig02662	GO:0005730	nucleolus	C	42
isotig02672	GO:0005730	nucleolus	C	42
isotig02711	GO:0005730	nucleolus	C	42
isotig02783	GO:0005783	endoplasmic reticulum	C	42
isotig02939	GO:0005730	nucleolus	C	42
isotig02940	GO:0005783	endoplasmic reticulum	C	42
isotig02952	GO:0005783	endoplasmic reticulum	C	42
isotig02988	GO:0005730	nucleolus	C	42
isotig03157	GO:0005783	endoplasmic reticulum	C	42
isotig03337	GO:0005783	endoplasmic reticulum	C	42
isotig03401	GO:0005730	nucleolus	C	42
isotig03420	GO:0005783	endoplasmic reticulum	C	42
isotig03475	GO:0005783	endoplasmic reticulum	C	42
isotig03488	GO:0005730	nucleolus	C	42
isotig03522	GO:0005783	endoplasmic reticulum	C	42
isotig03552	GO:0005730	nucleolus	C	42
isotig03575	GO:0005783	endoplasmic reticulum	C	42
isotig03693	GO:0005730	nucleolus	C	42
isotig03715	GO:0005730	nucleolus	C	42
isotig03732	GO:0005730	nucleolus	C	42
isotig03755	GO:0005783	endoplasmic reticulum	C	42
isotig03813	GO:0005730	nucleolus	C	42
isotig03891	GO:0005730	nucleolus	C	42
isotig03902	GO:0005783	endoplasmic reticulum	C	42
isotig03991	GO:0005783	endoplasmic reticulum	C	42
isotig04011	GO:0005730	nucleolus	C	42
isotig04012	GO:0005730	nucleolus	C	42
isotig04020	GO:0005783	endoplasmic reticulum	C	42
isotig04055	GO:0005730	nucleolus	C	42
isotig04213	GO:0005730	nucleolus	C	42
isotig04238	GO:0005730	nucleolus	C	42
isotig04291	GO:0005730	nucleolus	C	42
isotig04358	GO:0005730	nucleolus	C	42
isotig00107	GO:0005840	ribosome	C	53
isotig00128	GO:0005840	ribosome	C	53
isotig01126	GO:0005840	ribosome	C	53
isotig01137	GO:0005840	ribosome	C	53
isotig01201	GO:0005840	ribosome	C	53
isotig01318	GO:0005840	ribosome	C	53
isotig01321	GO:0005840	ribosome	C	53
isotig01381	GO:0005840	ribosome	C	53
isotig01386	GO:0005840	ribosome	C	53
isotig01622	GO:0005840	ribosome	C	53
isotig01780	GO:0005840	ribosome	C	53
isotig01912	GO:0005840	ribosome	C	53
isotig01913	GO:0005840	ribosome	C	53
isotig01945	GO:0005840	ribosome	C	53
isotig02023	GO:0005840	ribosome	C	53
isotig02134	GO:0005840	ribosome	C	53
isotig02163	GO:0005840	ribosome	C	53
isotig02248	GO:0005840	ribosome	C	53
isotig02335	GO:0005840	ribosome	C	53
isotig02381	GO:0005840	ribosome	C	53
isotig02423	GO:0005840	ribosome	C	53
isotig02464	GO:0005840	ribosome	C	53
isotig02490	GO:0005840	ribosome	C	53
isotig02547	GO:0005840	ribosome	C	53
isotig02575	GO:0005840	ribosome	C	53
isotig02605	GO:0005840	ribosome	C	53
isotig02634	GO:0005840	ribosome	C	53
isotig02657	GO:0005840	ribosome	C	53
isotig02706	GO:0005840	ribosome	C	53
isotig02733	GO:0005840	ribosome	C	53
isotig02741	GO:0005840	ribosome	C	53
isotig02864	GO:0005840	ribosome	C	53
isotig02889	GO:0005840	ribosome	C	53
isotig02965	GO:0005840	ribosome	C	53
isotig02978	GO:0005840	ribosome	C	53
isotig03019	GO:0005840	ribosome	C	53
isotig03080	GO:0005840	ribosome	C	53
isotig03196	GO:0005840	ribosome	C	53
isotig03275	GO:0005840	ribosome	C	53
isotig03581	GO:0005840	ribosome	C	53
isotig03660	GO:0005840	ribosome	C	53
isotig03707	GO:0005840	ribosome	C	53
isotig03977	GO:0005840	ribosome	C	53
isotig03987	GO:0005840	ribosome	C	53
isotig04017	GO:0005840	ribosome	C	53
isotig04031	GO:0005840	ribosome	C	53
isotig04096	GO:0005840	ribosome	C	53
isotig04101	GO:0005840	ribosome	C	53
isotig04127	GO:0005840	ribosome	C	53
isotig04146	GO:0005840	ribosome	C	53
isotig04272	GO:0005840	ribosome	C	53
isotig04313	GO:0005840	ribosome	C	53
isotig04403	GO:0005840	ribosome	C	53
isotig00464	GO:0016020	membrane	C	58
isotig00600	GO:0016020	membrane	C	58
isotig00735	GO:0016020	membrane	C	58
isotig00738	GO:0016020	membrane	C	58
isotig00746	GO:0016020	membrane	C	58
isotig00773	GO:0016020	membrane	C	58
isotig00976	GO:0016020	membrane	C	58
isotig01011	GO:0016020	membrane	C	58
isotig01054	GO:0016020	membrane	C	58
isotig01171	GO:0016020	membrane	C	58
isotig01192	GO:0016020	membrane	C	58
isotig01214	GO:0016020	membrane	C	58
isotig01323	GO:0016020	membrane	C	58
isotig01333	GO:0016020	membrane	C	58
isotig01393	GO:0016020	membrane	C	58
isotig01416	GO:0016020	membrane	C	58
isotig01436	GO:0016020	membrane	C	58
isotig01484	GO:0016020	membrane	C	58
isotig01582	GO:0016020	membrane	C	58
isotig01655	GO:0016020	membrane	C	58
isotig01674	GO:0016020	membrane	C	58
isotig01755	GO:0016020	membrane	C	58
isotig01782	GO:0016020	membrane	C	58
isotig01789	GO:0016020	membrane	C	58
isotig01794	GO:0016020	membrane	C	58
isotig01821	GO:0016020	membrane	C	58
isotig01876	GO:0016020	membrane	C	58
isotig02060	GO:0016020	membrane	C	58
isotig02125	GO:0016020	membrane	C	58
isotig02233	GO:0016020	membrane	C	58
isotig02265	GO:0016020	membrane	C	58
isotig02308	GO:0016020	membrane	C	58
isotig02447	GO:0016020	membrane	C	58
isotig02601	GO:0016020	membrane	C	58
isotig02678	GO:0016020	membrane	C	58
isotig02927	GO:0016020	membrane	C	58
isotig02942	GO:0016020	membrane	C	58
isotig02972	GO:0016020	membrane	C	58
isotig03035	GO:0016020	membrane	C	58
isotig03109	GO:0016020	membrane	C	58
isotig03166	GO:0016020	membrane	C	58
isotig03240	GO:0016020	membrane	C	58
isotig03338	GO:0016020	membrane	C	58
isotig03407	GO:0016020	membrane	C	58
isotig03425	GO:0016020	membrane	C	58
isotig03433	GO:0016020	membrane	C	58
isotig03476	GO:0016020	membrane	C	58
isotig03538	GO:0016020	membrane	C	58
isotig03627	GO:0016020	membrane	C	58
isotig03689	GO:0016020	membrane	C	58
isotig03774	GO:0016020	membrane	C	58
isotig03865	GO:0016020	membrane	C	58
isotig04061	GO:0016020	membrane	C	58
isotig04124	GO:0016020	membrane	C	58
isotig04150	GO:0016020	membrane	C	58
isotig04203	GO:0016020	membrane	C	58
isotig04278	GO:0016020	membrane	C	58
isotig04411	GO:0016020	membrane	C	58
isotig00282	GO:0016021	integral to membrane	C	59
isotig00388	GO:0016021	integral to membrane	C	59
isotig00761	GO:0016021	integral to membrane	C	59
isotig00802	GO:0016021	integral to membrane	C	59
isotig00828	GO:0016021	integral to membrane	C	59
isotig00866	GO:0016021	integral to membrane	C	59
isotig00878	GO:0016021	integral to membrane	C	59
isotig00931	GO:0016021	integral to membrane	C	59
isotig00988	GO:0016021	integral to membrane	C	59
isotig01035	GO:0016021	integral to membrane	C	59
isotig01093	GO:0016021	integral to membrane	C	59
isotig01114	GO:0016021	integral to membrane	C	59
isotig01256	GO:0016021	integral to membrane	C	59
isotig01261	GO:0016021	integral to membrane	C	59
isotig01262	GO:0016021	integral to membrane	C	59
isotig01385	GO:0016021	integral to membrane	C	59
isotig01461	GO:0016021	integral to membrane	C	59
isotig01500	GO:0016021	integral to membrane	C	59
isotig01520	GO:0016021	integral to membrane	C	59
isotig01597	GO:0016021	integral to membrane	C	59
isotig01602	GO:0016021	integral to membrane	C	59
isotig01744	GO:0016021	integral to membrane	C	59
isotig01776	GO:0016021	integral to membrane	C	59
isotig01807	GO:0016021	integral to membrane	C	59
isotig01816	GO:0016021	integral to membrane	C	59
isotig01843	GO:0016021	integral to membrane	C	59
isotig01919	GO:0016021	integral to membrane	C	59
isotig01964	GO:0016021	integral to membrane	C	59
isotig01981	GO:0016021	integral to membrane	C	59
isotig02035	GO:0016021	integral to membrane	C	59
isotig02061	GO:0016021	integral to membrane	C	59
isotig02094	GO:0016021	integral to membrane	C	59
isotig02138	GO:0016021	integral to membrane	C	59
isotig02235	GO:0016021	integral to membrane	C	59
isotig02242	GO:0016021	integral to membrane	C	59
isotig02331	GO:0016021	integral to membrane	C	59
isotig02339	GO:0016021	integral to membrane	C	59
isotig02467	GO:0016021	integral to membrane	C	59
isotig02472	GO:0016021	integral to membrane	C	59
isotig02499	GO:0016021	integral to membrane	C	59
isotig02505	GO:0016021	integral to membrane	C	59
isotig02520	GO:0016021	integral to membrane	C	59
isotig02763	GO:0016021	integral to membrane	C	59
isotig02843	GO:0016021	integral to membrane	C	59
isotig02888	GO:0016021	integral to membrane	C	59
isotig02961	GO:0016021	integral to membrane	C	59
isotig02970	GO:0016021	integral to membrane	C	59
isotig02973	GO:0016021	integral to membrane	C	59
isotig03036	GO:0016021	integral to membrane	C	59
isotig03054	GO:0016021	integral to membrane	C	59
isotig03060	GO:0016021	integral to membrane	C	59
isotig03185	GO:0016021	integral to membrane	C	59
isotig03278	GO:0016021	integral to membrane	C	59
isotig03426	GO:0016021	integral to membrane	C	59
isotig03472	GO:0016021	integral to membrane	C	59
isotig03490	GO:0016021	integral to membrane	C	59
isotig03518	GO:0016021	integral to membrane	C	59
isotig03852	GO:0016021	integral to membrane	C	59
isotig04327	GO:0016021	integral to membrane	C	59
isotig00412	GO:0005829	cytosol	C	62
isotig00452	GO:0005829	cytosol	C	62
isotig00592	GO:0005829	cytosol	C	62
isotig00749	GO:0005829	cytosol	C	62
isotig00834	GO:0005829	cytosol	C	62
isotig00882	GO:0005829	cytosol	C	62
isotig00885	GO:0005829	cytosol	C	62
isotig00916	GO:0005829	cytosol	C	62
isotig00918	GO:0005829	cytosol	C	62
isotig00975	GO:0005829	cytosol	C	62
isotig01071	GO:0005829	cytosol	C	62
isotig01121	GO:0005829	cytosol	C	62
isotig01168	GO:0005829	cytosol	C	62
isotig01217	GO:0005829	cytosol	C	62
isotig01247	GO:0005829	cytosol	C	62
isotig01249	GO:0005829	cytosol	C	62
isotig01320	GO:0005829	cytosol	C	62
isotig01324	GO:0005829	cytosol	C	62
isotig01327	GO:0005829	cytosol	C	62
isotig01413	GO:0005829	cytosol	C	62
isotig01447	GO:0005829	cytosol	C	62
isotig01463	GO:0005829	cytosol	C	62
isotig01482	GO:0005829	cytosol	C	62
isotig01489	GO:0005829	cytosol	C	62
isotig01552	GO:0005829	cytosol	C	62
isotig01681	GO:0005829	cytosol	C	62
isotig01709	GO:0005829	cytosol	C	62
isotig01758	GO:0005829	cytosol	C	62
isotig01783	GO:0005829	cytosol	C	62
isotig01830	GO:0005829	cytosol	C	62
isotig01898	GO:0005829	cytosol	C	62
isotig01975	GO:0005829	cytosol	C	62
isotig02022	GO:0005829	cytosol	C	62
isotig02031	GO:0005829	cytosol	C	62
isotig02153	GO:0005829	cytosol	C	62
isotig02338	GO:0005829	cytosol	C	62
isotig02515	GO:0005829	cytosol	C	62
isotig02571	GO:0005829	cytosol	C	62
isotig02705	GO:0005829	cytosol	C	62
isotig02782	GO:0005829	cytosol	C	62
isotig02845	GO:0005829	cytosol	C	62
isotig02866	GO:0005829	cytosol	C	62
isotig02879	GO:0005829	cytosol	C	62
isotig02882	GO:0005829	cytosol	C	62
isotig03047	GO:0005829	cytosol	C	62
isotig03323	GO:0005829	cytosol	C	62
isotig03352	GO:0005829	cytosol	C	62
isotig03365	GO:0005829	cytosol	C	62
isotig03397	GO:0005829	cytosol	C	62
isotig03445	GO:0005829	cytosol	C	62
isotig03671	GO:0005829	cytosol	C	62
isotig03693	GO:0005829	cytosol	C	62
isotig03744	GO:0005829	cytosol	C	62
isotig03784	GO:0005829	cytosol	C	62
isotig03927	GO:0005829	cytosol	C	62
isotig03968	GO:0005829	cytosol	C	62
isotig04029	GO:0005829	cytosol	C	62
isotig04065	GO:0005829	cytosol	C	62
isotig04073	GO:0005829	cytosol	C	62
isotig04124	GO:0005829	cytosol	C	62
isotig04268	GO:0005829	cytosol	C	62
isotig04439	GO:0005829	cytosol	C	62
isotig00316	GO:0005739	mitochondrion	C	73
isotig00342	GO:0005739	mitochondrion	C	73
isotig00412	GO:0005739	mitochondrion	C	73
isotig00682	GO:0005739	mitochondrion	C	73
isotig00749	GO:0005739	mitochondrion	C	73
isotig00766	GO:0005739	mitochondrion	C	73
isotig00801	GO:0005739	mitochondrion	C	73
isotig00806	GO:0005739	mitochondrion	C	73
isotig00834	GO:0005739	mitochondrion	C	73
isotig00882	GO:0005739	mitochondrion	C	73
isotig00982	GO:0005739	mitochondrion	C	73
isotig01053	GO:0005739	mitochondrion	C	73
isotig01056	GO:0005739	mitochondrion	C	73
isotig01087	GO:0005739	mitochondrion	C	73
isotig01322	GO:0005739	mitochondrion	C	73
isotig01323	GO:0005739	mitochondrion	C	73
isotig01327	GO:0005739	mitochondrion	C	73
isotig01339	GO:0005739	mitochondrion	C	73
isotig01426	GO:0005739	mitochondrion	C	73
isotig01447	GO:0005739	mitochondrion	C	73
isotig01517	GO:0005739	mitochondrion	C	73
isotig01626	GO:0005739	mitochondrion	C	73
isotig01674	GO:0005739	mitochondrion	C	73
isotig01677	GO:0005739	mitochondrion	C	73
isotig01712	GO:0005739	mitochondrion	C	73
isotig01755	GO:0005739	mitochondrion	C	73
isotig01770	GO:0005739	mitochondrion	C	73
isotig01908	GO:0005739	mitochondrion	C	73
isotig01916	GO:0005739	mitochondrion	C	73
isotig01943	GO:0005739	mitochondrion	C	73
isotig02022	GO:0005739	mitochondrion	C	73
isotig02049	GO:0005739	mitochondrion	C	73
isotig02060	GO:0005739	mitochondrion	C	73
isotig02107	GO:0005739	mitochondrion	C	73
isotig02113	GO:0005739	mitochondrion	C	73
isotig02175	GO:0005739	mitochondrion	C	73
isotig02220	GO:0005739	mitochondrion	C	73
isotig02283	GO:0005739	mitochondrion	C	73
isotig02289	GO:0005739	mitochondrion	C	73
isotig02309	GO:0005739	mitochondrion	C	73
isotig02405	GO:0005739	mitochondrion	C	73
isotig02410	GO:0005739	mitochondrion	C	73
isotig02453	GO:0005739	mitochondrion	C	73
isotig02458	GO:0005739	mitochondrion	C	73
isotig02461	GO:0005739	mitochondrion	C	73
isotig02465	GO:0005739	mitochondrion	C	73
isotig02506	GO:0005739	mitochondrion	C	73
isotig02543	GO:0005739	mitochondrion	C	73
isotig02574	GO:0005739	mitochondrion	C	73
isotig02591	GO:0005739	mitochondrion	C	73
isotig02782	GO:0005739	mitochondrion	C	73
isotig02825	GO:0005739	mitochondrion	C	73
isotig02835	GO:0005739	mitochondrion	C	73
isotig02939	GO:0005739	mitochondrion	C	73
isotig03003	GO:0005739	mitochondrion	C	73
isotig03142	GO:0005739	mitochondrion	C	73
isotig03209	GO:0005739	mitochondrion	C	73
isotig03278	GO:0005739	mitochondrion	C	73
isotig03279	GO:0005739	mitochondrion	C	73
isotig03284	GO:0005739	mitochondrion	C	73
isotig03338	GO:0005739	mitochondrion	C	73
isotig03407	GO:0005739	mitochondrion	C	73
isotig03476	GO:0005739	mitochondrion	C	73
isotig03482	GO:0005739	mitochondrion	C	73
isotig03486	GO:0005739	mitochondrion	C	73
isotig03488	GO:0005739	mitochondrion	C	73
isotig03587	GO:0005739	mitochondrion	C	73
isotig03710	GO:0005739	mitochondrion	C	73
isotig03757	GO:0005739	mitochondrion	C	73
isotig04083	GO:0005739	mitochondrion	C	73
isotig04150	GO:0005739	mitochondrion	C	73
isotig04172	GO:0005739	mitochondrion	C	73
isotig04203	GO:0005739	mitochondrion	C	73
isotig00284	GO:0005634	nucleus	C	133
isotig00322	GO:0005634	nucleus	C	133
isotig00388	GO:0005634	nucleus	C	133
isotig00412	GO:0005634	nucleus	C	133
isotig00418	GO:0005634	nucleus	C	133
isotig00430	GO:0005634	nucleus	C	133
isotig00504	GO:0005634	nucleus	C	133
isotig00518	GO:0005634	nucleus	C	133
isotig00650	GO:0005634	nucleus	C	133
isotig00696	GO:0005634	nucleus	C	133
isotig00714	GO:0005634	nucleus	C	133
isotig00724	GO:0005634	nucleus	C	133
isotig00750	GO:0005634	nucleus	C	133
isotig00771	GO:0005634	nucleus	C	133
isotig00880	GO:0005634	nucleus	C	133
isotig00883	GO:0005634	nucleus	C	133
isotig00984	GO:0005634	nucleus	C	133
isotig01001	GO:0005634	nucleus	C	133
isotig01012	GO:0005634	nucleus	C	133
isotig01023	GO:0005634	nucleus	C	133
isotig01067	GO:0005634	nucleus	C	133
isotig01077	GO:0005634	nucleus	C	133
isotig01102	GO:0005634	nucleus	C	133
isotig01140	GO:0005634	nucleus	C	133
isotig01168	GO:0005634	nucleus	C	133
isotig01172	GO:0005634	nucleus	C	133
isotig01205	GO:0005634	nucleus	C	133
isotig01218	GO:0005634	nucleus	C	133
isotig01245	GO:0005634	nucleus	C	133
isotig01290	GO:0005634	nucleus	C	133
isotig01302	GO:0005634	nucleus	C	133
isotig01322	GO:0005634	nucleus	C	133
isotig01332	GO:0005634	nucleus	C	133
isotig01343	GO:0005634	nucleus	C	133
isotig01353	GO:0005634	nucleus	C	133
isotig01374	GO:0005634	nucleus	C	133
isotig01405	GO:0005634	nucleus	C	133
isotig01413	GO:0005634	nucleus	C	133
isotig01421	GO:0005634	nucleus	C	133
isotig01424	GO:0005634	nucleus	C	133
isotig01470	GO:0005634	nucleus	C	133
isotig01499	GO:0005634	nucleus	C	133
isotig01553	GO:0005634	nucleus	C	133
isotig01572	GO:0005634	nucleus	C	133
isotig01574	GO:0005634	nucleus	C	133
isotig01575	GO:0005634	nucleus	C	133
isotig01578	GO:0005634	nucleus	C	133
isotig01585	GO:0005634	nucleus	C	133
isotig01615	GO:0005634	nucleus	C	133
isotig01681	GO:0005634	nucleus	C	133
isotig01758	GO:0005634	nucleus	C	133
isotig01794	GO:0005634	nucleus	C	133
isotig01834	GO:0005634	nucleus	C	133
isotig01840	GO:0005634	nucleus	C	133
isotig01872	GO:0005634	nucleus	C	133
isotig01952	GO:0005634	nucleus	C	133
isotig02017	GO:0005634	nucleus	C	133
isotig02022	GO:0005634	nucleus	C	133
isotig02050	GO:0005634	nucleus	C	133
isotig02116	GO:0005634	nucleus	C	133
isotig02142	GO:0005634	nucleus	C	133
isotig02165	GO:0005634	nucleus	C	133
isotig02179	GO:0005634	nucleus	C	133
isotig02185	GO:0005634	nucleus	C	133
isotig02238	GO:0005634	nucleus	C	133
isotig02440	GO:0005634	nucleus	C	133
isotig02468	GO:0005634	nucleus	C	133
isotig02503	GO:0005634	nucleus	C	133
isotig02506	GO:0005634	nucleus	C	133
isotig02515	GO:0005634	nucleus	C	133
isotig02532	GO:0005634	nucleus	C	133
isotig02551	GO:0005634	nucleus	C	133
isotig02569	GO:0005634	nucleus	C	133
isotig02588	GO:0005634	nucleus	C	133
isotig02601	GO:0005634	nucleus	C	133
isotig02622	GO:0005634	nucleus	C	133
isotig02679	GO:0005634	nucleus	C	133
isotig02755	GO:0005634	nucleus	C	133
isotig02773	GO:0005634	nucleus	C	133
isotig02805	GO:0005634	nucleus	C	133
isotig02812	GO:0005634	nucleus	C	133
isotig02813	GO:0005634	nucleus	C	133
isotig02828	GO:0005634	nucleus	C	133
isotig02842	GO:0005634	nucleus	C	133
isotig02849	GO:0005634	nucleus	C	133
isotig02851	GO:0005634	nucleus	C	133
isotig02855	GO:0005634	nucleus	C	133
isotig02928	GO:0005634	nucleus	C	133
isotig02945	GO:0005634	nucleus	C	133
isotig03003	GO:0005634	nucleus	C	133
isotig03007	GO:0005634	nucleus	C	133
isotig03010	GO:0005634	nucleus	C	133
isotig03067	GO:0005634	nucleus	C	133
isotig03087	GO:0005634	nucleus	C	133
isotig03088	GO:0005634	nucleus	C	133
isotig03107	GO:0005634	nucleus	C	133
isotig03323	GO:0005634	nucleus	C	133
isotig03352	GO:0005634	nucleus	C	133
isotig03395	GO:0005634	nucleus	C	133
isotig03397	GO:0005634	nucleus	C	133
isotig03428	GO:0005634	nucleus	C	133
isotig03498	GO:0005634	nucleus	C	133
isotig03541	GO:0005634	nucleus	C	133
isotig03549	GO:0005634	nucleus	C	133
isotig03668	GO:0005634	nucleus	C	133
isotig03692	GO:0005634	nucleus	C	133
isotig03719	GO:0005634	nucleus	C	133
isotig03744	GO:0005634	nucleus	C	133
isotig03800	GO:0005634	nucleus	C	133
isotig03827	GO:0005634	nucleus	C	133
isotig03848	GO:0005634	nucleus	C	133
isotig03867	GO:0005634	nucleus	C	133
isotig03884	GO:0005634	nucleus	C	133
isotig03902	GO:0005634	nucleus	C	133
isotig03951	GO:0005634	nucleus	C	133
isotig04006	GO:0005634	nucleus	C	133
isotig04029	GO:0005634	nucleus	C	133
isotig04056	GO:0005634	nucleus	C	133
isotig04110	GO:0005634	nucleus	C	133
isotig04122	GO:0005634	nucleus	C	133
isotig04157	GO:0005634	nucleus	C	133
isotig04172	GO:0005634	nucleus	C	133
isotig04192	GO:0005634	nucleus	C	133
isotig04200	GO:0005634	nucleus	C	133
isotig04201	GO:0005634	nucleus	C	133
isotig04215	GO:0005634	nucleus	C	133
isotig04223	GO:0005634	nucleus	C	133
isotig04239	GO:0005634	nucleus	C	133
isotig04268	GO:0005634	nucleus	C	133
isotig04275	GO:0005634	nucleus	C	133
isotig04296	GO:0005634	nucleus	C	133
isotig04314	GO:0005634	nucleus	C	133
isotig04344	GO:0005634	nucleus	C	133
isotig00257	GO:0005737	cytoplasm	C	148
isotig00296	GO:0005737	cytoplasm	C	148
isotig00329	GO:0005737	cytoplasm	C	148
isotig00382	GO:0005737	cytoplasm	C	148
isotig00418	GO:0005737	cytoplasm	C	148
isotig00454	GO:0005737	cytoplasm	C	148
isotig00518	GO:0005737	cytoplasm	C	148
isotig00628	GO:0005737	cytoplasm	C	148
isotig00672	GO:0005737	cytoplasm	C	148
isotig00696	GO:0005737	cytoplasm	C	148
isotig00716	GO:0005737	cytoplasm	C	148
isotig00762	GO:0005737	cytoplasm	C	148
isotig00775	GO:0005737	cytoplasm	C	148
isotig00785	GO:0005737	cytoplasm	C	148
isotig00786	GO:0005737	cytoplasm	C	148
isotig00788	GO:0005737	cytoplasm	C	148
isotig00793	GO:0005737	cytoplasm	C	148
isotig00809	GO:0005737	cytoplasm	C	148
isotig00826	GO:0005737	cytoplasm	C	148
isotig00829	GO:0005737	cytoplasm	C	148
isotig00857	GO:0005737	cytoplasm	C	148
isotig00896	GO:0005737	cytoplasm	C	148
isotig00898	GO:0005737	cytoplasm	C	148
isotig00912	GO:0005737	cytoplasm	C	148
isotig00937	GO:0005737	cytoplasm	C	148
isotig00947	GO:0005737	cytoplasm	C	148
isotig00951	GO:0005737	cytoplasm	C	148
isotig00960	GO:0005737	cytoplasm	C	148
isotig01012	GO:0005737	cytoplasm	C	148
isotig01042	GO:0005737	cytoplasm	C	148
isotig01044	GO:0005737	cytoplasm	C	148
isotig01050	GO:0005737	cytoplasm	C	148
isotig01052	GO:0005737	cytoplasm	C	148
isotig01067	GO:0005737	cytoplasm	C	148
isotig01072	GO:0005737	cytoplasm	C	148
isotig01080	GO:0005737	cytoplasm	C	148
isotig01102	GO:0005737	cytoplasm	C	148
isotig01118	GO:0005737	cytoplasm	C	148
isotig01140	GO:0005737	cytoplasm	C	148
isotig01151	GO:0005737	cytoplasm	C	148
isotig01197	GO:0005737	cytoplasm	C	148
isotig01202	GO:0005737	cytoplasm	C	148
isotig01233	GO:0005737	cytoplasm	C	148
isotig01241	GO:0005737	cytoplasm	C	148
isotig01245	GO:0005737	cytoplasm	C	148
isotig01278	GO:0005737	cytoplasm	C	148
isotig01292	GO:0005737	cytoplasm	C	148
isotig01347	GO:0005737	cytoplasm	C	148
isotig01374	GO:0005737	cytoplasm	C	148
isotig01446	GO:0005737	cytoplasm	C	148
isotig01453	GO:0005737	cytoplasm	C	148
isotig01527	GO:0005737	cytoplasm	C	148
isotig01529	GO:0005737	cytoplasm	C	148
isotig01550	GO:0005737	cytoplasm	C	148
isotig01556	GO:0005737	cytoplasm	C	148
isotig01578	GO:0005737	cytoplasm	C	148
isotig01585	GO:0005737	cytoplasm	C	148
isotig01590	GO:0005737	cytoplasm	C	148
isotig01600	GO:0005737	cytoplasm	C	148
isotig01615	GO:0005737	cytoplasm	C	148
isotig01620	GO:0005737	cytoplasm	C	148
isotig01688	GO:0005737	cytoplasm	C	148
isotig01785	GO:0005737	cytoplasm	C	148
isotig01800	GO:0005737	cytoplasm	C	148
isotig01831	GO:0005737	cytoplasm	C	148
isotig01848	GO:0005737	cytoplasm	C	148
isotig01875	GO:0005737	cytoplasm	C	148
isotig01952	GO:0005737	cytoplasm	C	148
isotig01995	GO:0005737	cytoplasm	C	148
isotig02032	GO:0005737	cytoplasm	C	148
isotig02063	GO:0005737	cytoplasm	C	148
isotig02075	GO:0005737	cytoplasm	C	148
isotig02097	GO:0005737	cytoplasm	C	148
isotig02099	GO:0005737	cytoplasm	C	148
isotig02104	GO:0005737	cytoplasm	C	148
isotig02116	GO:0005737	cytoplasm	C	148
isotig02135	GO:0005737	cytoplasm	C	148
isotig02142	GO:0005737	cytoplasm	C	148
isotig02203	GO:0005737	cytoplasm	C	148
isotig02276	GO:0005737	cytoplasm	C	148
isotig02281	GO:0005737	cytoplasm	C	148
isotig02324	GO:0005737	cytoplasm	C	148
isotig02362	GO:0005737	cytoplasm	C	148
isotig02363	GO:0005737	cytoplasm	C	148
isotig02374	GO:0005737	cytoplasm	C	148
isotig02406	GO:0005737	cytoplasm	C	148
isotig02446	GO:0005737	cytoplasm	C	148
isotig02468	GO:0005737	cytoplasm	C	148
isotig02522	GO:0005737	cytoplasm	C	148
isotig02544	GO:0005737	cytoplasm	C	148
isotig02565	GO:0005737	cytoplasm	C	148
isotig02585	GO:0005737	cytoplasm	C	148
isotig02588	GO:0005737	cytoplasm	C	148
isotig02599	GO:0005737	cytoplasm	C	148
isotig02679	GO:0005737	cytoplasm	C	148
isotig02711	GO:0005737	cytoplasm	C	148
isotig02712	GO:0005737	cytoplasm	C	148
isotig02743	GO:0005737	cytoplasm	C	148
isotig02749	GO:0005737	cytoplasm	C	148
isotig02760	GO:0005737	cytoplasm	C	148
isotig02786	GO:0005737	cytoplasm	C	148
isotig02805	GO:0005737	cytoplasm	C	148
isotig02812	GO:0005737	cytoplasm	C	148
isotig02831	GO:0005737	cytoplasm	C	148
isotig02851	GO:0005737	cytoplasm	C	148
isotig02890	GO:0005737	cytoplasm	C	148
isotig02899	GO:0005737	cytoplasm	C	148
isotig02927	GO:0005737	cytoplasm	C	148
isotig02988	GO:0005737	cytoplasm	C	148
isotig02991	GO:0005737	cytoplasm	C	148
isotig02997	GO:0005737	cytoplasm	C	148
isotig03022	GO:0005737	cytoplasm	C	148
isotig03088	GO:0005737	cytoplasm	C	148
isotig03107	GO:0005737	cytoplasm	C	148
isotig03130	GO:0005737	cytoplasm	C	148
isotig03145	GO:0005737	cytoplasm	C	148
isotig03175	GO:0005737	cytoplasm	C	148
isotig03183	GO:0005737	cytoplasm	C	148
isotig03198	GO:0005737	cytoplasm	C	148
isotig03230	GO:0005737	cytoplasm	C	148
isotig03264	GO:0005737	cytoplasm	C	148
isotig03276	GO:0005737	cytoplasm	C	148
isotig03375	GO:0005737	cytoplasm	C	148
isotig03391	GO:0005737	cytoplasm	C	148
isotig03395	GO:0005737	cytoplasm	C	148
isotig03437	GO:0005737	cytoplasm	C	148
isotig03524	GO:0005737	cytoplasm	C	148
isotig03541	GO:0005737	cytoplasm	C	148
isotig03552	GO:0005737	cytoplasm	C	148
isotig03647	GO:0005737	cytoplasm	C	148
isotig03722	GO:0005737	cytoplasm	C	148
isotig03732	GO:0005737	cytoplasm	C	148
isotig03842	GO:0005737	cytoplasm	C	148
isotig03884	GO:0005737	cytoplasm	C	148
isotig04012	GO:0005737	cytoplasm	C	148
isotig04022	GO:0005737	cytoplasm	C	148
isotig04056	GO:0005737	cytoplasm	C	148
isotig04110	GO:0005737	cytoplasm	C	148
isotig04192	GO:0005737	cytoplasm	C	148
isotig04210	GO:0005737	cytoplasm	C	148
isotig04215	GO:0005737	cytoplasm	C	148
isotig04275	GO:0005737	cytoplasm	C	148
isotig04314	GO:0005737	cytoplasm	C	148
isotig04327	GO:0005737	cytoplasm	C	148
isotig04344	GO:0005737	cytoplasm	C	148
isotig04358	GO:0005737	cytoplasm	C	148
isotig04386	GO:0005737	cytoplasm	C	148
isotig04446	GO:0005737	cytoplasm	C	148

## Sheet: T.dichotomus Biological process
Hit	GO Term	Description	Type	Frequency
isotig00226	GO:0009446	putrescine biosynthetic process	P	1
isotig00250	GO:0006657	CDP-choline pathway	P	1
isotig00296	GO:0002376	immune system process	P	1
isotig00308	GO:0035006	melanization defense response	P	1
isotig00308	GO:0035298	regulation of Malpighian tubule size	P	1
isotig00308	GO:0007479	leg disc proximal/distal pattern formation	P	1
isotig00308	GO:0030589	pseudocleavage involved in syncytial blastoderm formation	P	1
isotig00308	GO:0038005	peptide bond cleavage involved in epidermal growth factor receptor ligand maturation	P	1
isotig00308	GO:0007432	salivary gland boundary specification	P	1
isotig00308	GO:0048149	behavioral response to ethanol	P	1
isotig00308	GO:0050770	regulation of axonogenesis	P	1
isotig00308	GO:0007405	neuroblast proliferation	P	1
isotig00308	GO:0007474	imaginal disc-derived wing vein specification	P	1
isotig00308	GO:0045199	maintenance of epithelial cell apical/basal polarity	P	1
isotig00308	GO:0016337	cell-cell adhesion	P	1
isotig00308	GO:0007395	dorsal closure, spreading of leading edge cells	P	1
isotig00308	GO:0061331	epithelial cell proliferation involved in Malpighian tubule morphogenesis	P	1
isotig00308	GO:0008347	glial cell migration	P	1
isotig00308	GO:0007377	germ-band extension	P	1
isotig00308	GO:0070593	dendrite self-avoidance	P	1
isotig00308	GO:0048865	stem cell fate commitment	P	1
isotig00308	GO:0007254	JNK cascade	P	1
isotig00308	GO:0046664	dorsal closure, amnioserosa morphology change	P	1
isotig00308	GO:0035225	determination of genital disc primordium	P	1
isotig00308	GO:0016476	regulation of embryonic cell shape	P	1
isotig00308	GO:0035149	lumen formation, open tracheal system	P	1
isotig00308	GO:0007438	oenocyte development	P	1
isotig00308	GO:0035277	spiracle morphogenesis, open tracheal system	P	1
isotig00308	GO:0045184	establishment of protein localization	P	1
isotig00308	GO:0051493	regulation of cytoskeleton organization	P	1
isotig00308	GO:0035147	branch fusion, open tracheal system	P	1
isotig00308	GO:0046845	branched duct epithelial cell fate determination, open tracheal system	P	1
isotig00308	GO:0051017	actin filament bundle assembly	P	1
isotig00308	GO:0007374	posterior midgut invagination	P	1
isotig00308	GO:0016203	muscle attachment	P	1
isotig00308	GO:0035311	wing cell fate specification	P	1
isotig00308	GO:0016318	ommatidial rotation	P	1
isotig00308	GO:0008586	imaginal disc-derived wing vein morphogenesis	P	1
isotig00308	GO:0007368	determination of left/right symmetry	P	1
isotig00308	GO:0035202	tracheal pit formation in open tracheal system	P	1
isotig00308	GO:0035160	maintenance of epithelial integrity, open tracheal system	P	1
isotig00308	GO:0046663	dorsal closure, leading edge cell differentiation	P	1
isotig00314	GO:0010608	posttranscriptional regulation of gene expression	P	1
isotig00314	GO:0023052	signaling	P	1
isotig00314	GO:0022607	cellular component assembly	P	1
isotig00314	GO:0032268	regulation of cellular protein metabolic process	P	1
isotig00342	GO:0006475	internal protein amino acid acetylation	P	1
isotig00408	GO:0000226	microtubule cytoskeleton organization	P	1
isotig00412	GO:0009399	nitrogen fixation	P	1
isotig00418	GO:0006606	protein import into nucleus	P	1
isotig00430	GO:0046390	ribose phosphate biosynthetic process	P	1
isotig00430	GO:0046166	glyceraldehyde-3-phosphate biosynthetic process	P	1
isotig00452	GO:0010951	negative regulation of endopeptidase activity	P	1
isotig00504	GO:0045600	positive regulation of fat cell differentiation	P	1
isotig00504	GO:0046326	positive regulation of glucose import	P	1
isotig00504	GO:0033138	positive regulation of peptidyl-serine phosphorylation	P	1
isotig00510	GO:0001541	ovarian follicle development	P	1
isotig00558	GO:0046121	deoxyribonucleoside catabolic process	P	1
isotig00576	GO:0050796	regulation of insulin secretion	P	1
isotig00576	GO:0015758	glucose transport	P	1
isotig00576	GO:0006112	energy reserve metabolic process	P	1
isotig00592	GO:0006884	cell volume homeostasis	P	1
isotig00592	GO:0006821	chloride transport	P	1
isotig00600	GO:0016079	synaptic vesicle exocytosis	P	1
isotig00600	GO:0051124	synaptic growth at neuromuscular junction	P	1
isotig00600	GO:0046928	regulation of neurotransmitter secretion	P	1
isotig00606	GO:0016574	histone ubiquitination	P	1
isotig00616	GO:0006750	glutathione biosynthetic process	P	1
isotig00616	GO:0009410	response to xenobiotic stimulus	P	1
isotig00616	GO:0034612	response to tumor necrosis factor	P	1
isotig00628	GO:0030728	ovulation	P	1
isotig00638	GO:0048705	skeletal system morphogenesis	P	1
isotig00682	GO:0031346	positive regulation of cell projection organization	P	1
isotig00682	GO:0034332	adherens junction organization	P	1
isotig00682	GO:0051461	positive regulation of corticotropin secretion	P	1
isotig00682	GO:0045046	protein import into peroxisome membrane	P	1
isotig00709	GO:0007498	mesoderm development	P	1
isotig00711	GO:0090304	nucleic acid metabolic process	P	1
isotig00714	GO:0008348	negative regulation of antimicrobial humoral response	P	1
isotig00714	GO:0007480	imaginal disc-derived leg morphogenesis	P	1
isotig00714	GO:0007379	segment specification	P	1
isotig00716	GO:0048255	mRNA stabilization	P	1
isotig00716	GO:0060212	negative regulation of nuclear-transcribed mRNA poly(A) tail shortening	P	1
isotig00721	GO:0007098	centrosome cycle	P	1
isotig00721	GO:0019094	pole plasm mRNA localization	P	1
isotig00721	GO:0007465	R7 cell fate commitment	P	1
isotig00736	GO:0008344	adult locomotory behavior	P	1
isotig00736	GO:0042053	regulation of dopamine metabolic process	P	1
isotig00736	GO:0048082	regulation of adult chitin-containing cuticle pigmentation	P	1
isotig00736	GO:2000274	regulation of epithelial cell migration, open tracheal system	P	1
isotig00736	GO:0040040	thermosensory behavior	P	1
isotig00736	GO:0009072	aromatic amino acid family metabolic process	P	1
isotig00736	GO:0042416	dopamine biosynthetic process	P	1
isotig00749	GO:0031100	organ regeneration	P	1
isotig00749	GO:0006189	'de novo' IMP biosynthetic process	P	1
isotig00778	GO:0006554	lysine catabolic process	P	1
isotig00778	GO:0006081	cellular aldehyde metabolic process	P	1
isotig00778	GO:0007605	sensory perception of sound	P	1
isotig00780	GO:0055013	cardiac muscle cell development	P	1
isotig00789	GO:0007313	maternal specification of dorsal/ventral axis, oocyte, soma encoded	P	1
isotig00789	GO:0031935	regulation of chromatin silencing	P	1
isotig00789	GO:0042048	olfactory behavior	P	1
isotig00789	GO:0008595	anterior/posterior axis specification, embryo	P	1
isotig00791	GO:0042136	neurotransmitter biosynthetic process	P	1
isotig00803	GO:0050905	neuromuscular process	P	1
isotig00803	GO:0007626	locomotory behavior	P	1
isotig00834	GO:0048545	response to steroid hormone stimulus	P	1
isotig00834	GO:0006749	glutathione metabolic process	P	1
isotig00855	GO:0006068	ethanol catabolic process	P	1
isotig00866	GO:0006829	zinc ion transport	P	1
isotig00882	GO:0001894	tissue homeostasis	P	1
isotig00882	GO:0006084	acetyl-CoA metabolic process	P	1
isotig00882	GO:0055088	lipid homeostasis	P	1
isotig00882	GO:0044268	multicellular organismal protein metabolic process	P	1
isotig00885	GO:0006000	fructose metabolic process	P	1
isotig00894	GO:0035071	salivary gland cell autophagic cell death	P	1
isotig00914	GO:0032870	cellular response to hormone stimulus	P	1
isotig00916	GO:0051066	dihydrobiopterin metabolic process	P	1
isotig00919	GO:0007284	spermatogonial cell division	P	1
isotig00919	GO:0045478	fusome organization	P	1
isotig00919	GO:0048024	regulation of nuclear mRNA splicing, via spliceosome	P	1
isotig00919	GO:0007282	cystoblast division	P	1
isotig00944	GO:0008285	negative regulation of cell proliferation	P	1
isotig00948	GO:0031115	negative regulation of microtubule polymerization	P	1
isotig00948	GO:0035372	protein localization to microtubule	P	1
isotig00975	GO:0005981	regulation of glycogen catabolic process	P	1
isotig00975	GO:0030324	lung development	P	1
isotig00982	GO:0050890	cognition	P	1
isotig01004	GO:0006098	pentose-phosphate shunt	P	1
isotig01009	GO:0001818	negative regulation of cytokine production	P	1
isotig01009	GO:0048583	regulation of response to stimulus	P	1
isotig01009	GO:0001953	negative regulation of cell-matrix adhesion	P	1
isotig01017	GO:0006509	membrane protein ectodomain proteolysis	P	1
isotig01017	GO:0031293	membrane protein intracellular domain proteolysis	P	1
isotig01024	GO:0001523	retinoid metabolic process	P	1
isotig01024	GO:0006776	vitamin A metabolic process	P	1
isotig01048	GO:0019853	L-ascorbic acid biosynthetic process	P	1
isotig01072	GO:0006452	translational frameshifting	P	1
isotig01072	GO:0008612	peptidyl-lysine modification to hypusine	P	1
isotig01072	GO:0045905	positive regulation of translational termination	P	1
isotig01072	GO:0045901	positive regulation of translational elongation	P	1
isotig01091	GO:0008258	head involution	P	1
isotig01091	GO:0045926	negative regulation of growth	P	1
isotig01093	GO:0007602	phototransduction	P	1
isotig01093	GO:0007632	visual behavior	P	1
isotig01098	GO:0045132	meiotic chromosome segregation	P	1
isotig01098	GO:0000212	meiotic spindle organization	P	1
isotig01112	GO:0055129	L-proline biosynthetic process	P	1
isotig01121	GO:0045730	respiratory burst	P	1
isotig01121	GO:0043456	regulation of pentose-phosphate shunt	P	1
isotig01121	GO:0006110	regulation of glycolysis	P	1
isotig01168	GO:0018216	peptidyl-arginine methylation	P	1
isotig01168	GO:0045653	negative regulation of megakaryocyte differentiation	P	1
isotig01168	GO:0031175	neuron projection development	P	1
isotig01168	GO:0043985	histone H4-R3 methylation	P	1
isotig01174	GO:0060288	formation of a compartment boundary	P	1
isotig01174	GO:0001736	establishment of planar polarity	P	1
isotig01174	GO:0007300	ovarian nurse cell to oocyte transport	P	1
isotig01174	GO:0035191	nuclear axial expansion	P	1
isotig01181	GO:0070221	sulfide oxidation, using sulfide:quinone oxidoreductase	P	1
isotig01181	GO:0006835	dicarboxylic acid transport	P	1
isotig01181	GO:0000098	sulfur amino acid catabolic process	P	1
isotig01205	GO:0043508	negative regulation of JUN kinase activity	P	1
isotig01212	GO:0006807	nitrogen compound metabolic process	P	1
isotig01214	GO:0015766	disaccharide transport	P	1
isotig01239	GO:0045185	maintenance of protein location	P	1
isotig01247	GO:0001677	formation of translation initiation ternary complex	P	1
isotig01275	GO:0006844	acyl carnitine transport	P	1
isotig01275	GO:0015879	carnitine transport	P	1
isotig01275	GO:0006839	mitochondrial transport	P	1
isotig01302	GO:0006376	mRNA splice site selection	P	1
isotig01302	GO:0045292	nuclear mRNA cis splicing, via spliceosome	P	1
isotig01322	GO:2000277	positive regulation of oxidative phosphorylation uncoupler activity	P	1
isotig01322	GO:0070301	cellular response to hydrogen peroxide	P	1
isotig01322	GO:0060548	negative regulation of cell death	P	1
isotig01324	GO:0009221	pyrimidine deoxyribonucleotide biosynthetic process	P	1
isotig01324	GO:0046940	nucleoside monophosphate phosphorylation	P	1
isotig01324	GO:0015949	nucleobase-containing small molecule interconversion	P	1
isotig01327	GO:0008205	ecdysone metabolic process	P	1
isotig01327	GO:0008210	estrogen metabolic process	P	1
isotig01327	GO:0008209	androgen metabolic process	P	1
isotig01338	GO:0009056	catabolic process	P	1
isotig01347	GO:0006044	N-acetylglucosamine metabolic process	P	1
isotig01347	GO:0006043	glucosamine catabolic process	P	1
isotig01392	GO:0031540	regulation of anthocyanin biosynthetic process	P	1
isotig01392	GO:0010224	response to UV-B	P	1
isotig01392	GO:0046686	response to cadmium ion	P	1
isotig01392	GO:0031347	regulation of defense response	P	1
isotig01392	GO:0060255	regulation of macromolecule metabolic process	P	1
isotig01392	GO:0009627	systemic acquired resistance	P	1
isotig01406	GO:0034645	cellular macromolecule biosynthetic process	P	1
isotig01421	GO:0000737	DNA catabolic process, endonucleolytic	P	1
isotig01421	GO:2001251	negative regulation of chromosome organization	P	1
isotig01421	GO:0071157	negative regulation of cell cycle arrest	P	1
isotig01421	GO:0006313	transposition, DNA-mediated	P	1
isotig01421	GO:2001034	positive regulation of double-strand break repair via nonhomologous end joining	P	1
isotig01421	GO:0000729	DNA double-strand break processing	P	1
isotig01424	GO:0071218	cellular response to misfolded protein	P	1
isotig01424	GO:0006515	misfolded or incompletely synthesized protein catabolic process	P	1
isotig01432	GO:0006450	regulation of translational fidelity	P	1
isotig01446	GO:0040019	positive regulation of embryonic development	P	1
isotig01447	GO:0006421	asparaginyl-tRNA aminoacylation	P	1
isotig01455	GO:0051094	positive regulation of developmental process	P	1
isotig01455	GO:2000026	regulation of multicellular organismal development	P	1
isotig01470	GO:0031047	gene silencing by RNA	P	1
isotig01489	GO:0042546	cell wall biogenesis	P	1
isotig01499	GO:0016925	protein sumoylation	P	1
isotig01519	GO:0016197	endosomal transport	P	1
isotig01520	GO:0019646	aerobic electron transport chain	P	1
isotig01522	GO:0009051	pentose-phosphate shunt, oxidative branch	P	1
isotig01524	GO:0035050	embryonic heart tube development	P	1
isotig01524	GO:0007637	proboscis extension reflex	P	1
isotig01525	GO:0051086	chaperone mediated protein folding independent of cofactor	P	1
isotig01528	GO:0010797	regulation of multivesicular body size involved in endosome transport	P	1
isotig01528	GO:0009792	embryo development ending in birth or egg hatching	P	1
isotig01528	GO:0044130	negative regulation of growth of symbiont in host	P	1
isotig01529	GO:0008062	eclosion rhythm	P	1
isotig01529	GO:0040011	locomotion	P	1
isotig01529	GO:0045804	negative regulation of eclosion	P	1
isotig01546	GO:0000278	mitotic cell cycle	P	1
isotig01546	GO:0022403	cell cycle phase	P	1
isotig01548	GO:0008039	synaptic target recognition	P	1
isotig01548	GO:0007017	microtubule-based process	P	1
isotig01552	GO:0050690	regulation of defense response to virus by virus	P	1
isotig01556	GO:0044208	'de novo' AMP biosynthetic process	P	1
isotig01558	GO:0035204	negative regulation of lamellocyte differentiation	P	1
isotig01558	GO:0007527	adult somatic muscle development	P	1
isotig01558	GO:0030708	germarium-derived female germ-line cyst encapsulation	P	1
isotig01558	GO:0014703	oscillatory muscle contraction	P	1
isotig01558	GO:0008302	female germline ring canal formation, actin assembly	P	1
isotig01567	GO:0051641	cellular localization	P	1
isotig01567	GO:0051128	regulation of cellular component organization	P	1
isotig01574	GO:0030702	chromatin silencing at centromere	P	1
isotig01574	GO:0051567	histone H3-K9 methylation	P	1
isotig01574	GO:0006306	DNA methylation	P	1
isotig01574	GO:0070868	heterochromatin organization involved in chromatin silencing	P	1
isotig01574	GO:0031507	heterochromatin assembly	P	1
isotig01574	GO:0006348	chromatin silencing at telomere	P	1
isotig01585	GO:0006869	lipid transport	P	1
isotig01597	GO:0032527	protein exit from endoplasmic reticulum	P	1
isotig01597	GO:0034498	early endosome to Golgi transport	P	1
isotig01597	GO:0010638	positive regulation of organelle organization	P	1
isotig01613	GO:0051347	positive regulation of transferase activity	P	1
isotig01613	GO:0015825	L-serine transport	P	1
isotig01613	GO:0006665	sphingolipid metabolic process	P	1
isotig01613	GO:0006658	phosphatidylserine metabolic process	P	1
isotig01615	GO:0071385	cellular response to glucocorticoid stimulus	P	1
isotig01615	GO:0007090	regulation of S phase of mitotic cell cycle	P	1
isotig01626	GO:0033673	negative regulation of kinase activity	P	1
isotig01626	GO:0001893	maternal placenta development	P	1
isotig01626	GO:0043154	negative regulation of cysteine-type endopeptidase activity involved in apoptotic process	P	1
isotig01626	GO:0030099	myeloid cell differentiation	P	1
isotig01627	GO:0002862	negative regulation of inflammatory response to antigenic stimulus	P	1
isotig01634	GO:0007219	Notch signaling pathway	P	1
isotig01639	GO:0008054	cyclin catabolic process	P	1
isotig01639	GO:0045676	regulation of R7 cell differentiation	P	1
isotig01639	GO:0016322	neuron remodeling	P	1
isotig01668	GO:0007597	blood coagulation, intrinsic pathway	P	1
isotig01668	GO:0031639	plasminogen activation	P	1
isotig01668	GO:0022617	extracellular matrix disassembly	P	1
isotig01668	GO:0051919	positive regulation of fibrinolysis	P	1
isotig01668	GO:0002542	Factor XII activation	P	1
isotig01690	GO:0045922	negative regulation of fatty acid metabolic process	P	1
isotig01690	GO:0019395	fatty acid oxidation	P	1
isotig01697	GO:0030282	bone mineralization	P	1
isotig01697	GO:0046477	glycosylceramide catabolic process	P	1
isotig01702	GO:0009083	branched chain family amino acid catabolic process	P	1
isotig01709	GO:0035584	calcium-mediated signaling using intracellular calcium source	P	1
isotig01709	GO:0051561	elevation of mitochondrial calcium ion concentration	P	1
isotig01709	GO:0002474	antigen processing and presentation of peptide antigen via MHC class I	P	1
isotig01709	GO:2001244	positive regulation of intrinsic apoptotic signaling pathway	P	1
isotig01709	GO:0043280	positive regulation of cysteine-type endopeptidase activity involved in apoptotic process	P	1
isotig01709	GO:0007204	elevation of cytosolic calcium ion concentration	P	1
isotig01709	GO:0032471	reduction of endoplasmic reticulum calcium ion concentration	P	1
isotig01717	GO:0030317	sperm motility	P	1
isotig01717	GO:0046370	fructose biosynthetic process	P	1
isotig01717	GO:0051160	L-xylitol catabolic process	P	1
isotig01717	GO:0006062	sorbitol catabolic process	P	1
isotig01717	GO:0006006	glucose metabolic process	P	1
isotig01742	GO:0006613	cotranslational protein targeting to membrane	P	1
isotig01754	GO:0030218	erythrocyte differentiation	P	1
isotig01754	GO:0042541	hemoglobin biosynthetic process	P	1
isotig01755	GO:0045610	regulation of hemocyte differentiation	P	1
isotig01755	GO:0035206	regulation of hemocyte proliferation	P	1
isotig01758	GO:0043648	dicarboxylic acid metabolic process	P	1
isotig01758	GO:0043434	response to peptide hormone stimulus	P	1
isotig01758	GO:0007259	JAK-STAT cascade	P	1
isotig01758	GO:0045621	positive regulation of lymphocyte differentiation	P	1
isotig01758	GO:0071310	cellular response to organic substance	P	1
isotig01758	GO:0034097	response to cytokine stimulus	P	1
isotig01758	GO:0042110	T cell activation	P	1
isotig01758	GO:0010604	positive regulation of macromolecule metabolic process	P	1
isotig01758	GO:0006575	cellular modified amino acid metabolic process	P	1
isotig01758	GO:0030101	natural killer cell activation	P	1
isotig01773	GO:0031325	positive regulation of cellular metabolic process	P	1
isotig01773	GO:0009967	positive regulation of signal transduction	P	1
isotig01777	GO:0046330	positive regulation of JNK cascade	P	1
isotig01777	GO:0007520	myoblast fusion	P	1
isotig01777	GO:0046529	imaginal disc fusion, thorax closure	P	1
isotig01781	GO:0001751	compound eye photoreceptor cell differentiation	P	1
isotig01781	GO:0000338	protein deneddylation	P	1
isotig01781	GO:0032435	negative regulation of proteasomal ubiquitin-dependent protein catabolic process	P	1
isotig01785	GO:0030032	lamellipodium assembly	P	1
isotig01785	GO:0048041	focal adhesion assembly	P	1
isotig01785	GO:0018108	peptidyl-tyrosine phosphorylation	P	1
isotig01785	GO:0060396	growth hormone receptor signaling pathway	P	1
isotig01785	GO:0000187	activation of MAPK activity	P	1
isotig01791	GO:0043525	positive regulation of neuron apoptotic process	P	1
isotig01800	GO:0010243	response to organic nitrogen	P	1
isotig01807	GO:0006486	protein glycosylation	P	1
isotig01812	GO:0044255	cellular lipid metabolic process	P	1
isotig01816	GO:0035435	phosphate ion transmembrane transport	P	1
isotig01823	GO:0021513	spinal cord dorsal/ventral patterning	P	1
isotig01823	GO:0045861	negative regulation of proteolysis	P	1
isotig01823	GO:0042733	embryonic digit morphogenesis	P	1
isotig01827	GO:0032147	activation of protein kinase activity	P	1
isotig01833	GO:0045321	leukocyte activation	P	1
isotig01834	GO:0007612	learning	P	1
isotig01834	GO:0001763	morphogenesis of a branching structure	P	1
isotig01834	GO:0048167	regulation of synaptic plasticity	P	1
isotig01852	GO:0000042	protein targeting to Golgi	P	1
isotig01858	GO:0007608	sensory perception of smell	P	1
isotig01875	GO:0051246	regulation of protein metabolic process	P	1
isotig01875	GO:0031324	negative regulation of cellular metabolic process	P	1
isotig01875	GO:0043549	regulation of kinase activity	P	1
isotig01875	GO:0051329	interphase of mitotic cell cycle	P	1
isotig01875	GO:0070887	cellular response to chemical stimulus	P	1
isotig01898	GO:0007023	post-chaperonin tubulin folding pathway	P	1
isotig01900	GO:0006458	'de novo' protein folding	P	1
isotig01908	GO:0048666	neuron development	P	1
isotig01908	GO:0021510	spinal cord development	P	1
isotig01908	GO:0006935	chemotaxis	P	1
isotig01910	GO:0006781	succinyl-CoA pathway	P	1
isotig01939	GO:0043001	Golgi to plasma membrane protein transport	P	1
isotig01939	GO:0007369	gastrulation	P	1
isotig01939	GO:0034067	protein localization in Golgi apparatus	P	1
isotig01952	GO:0016202	regulation of striated muscle tissue development	P	1
isotig01954	GO:0019321	pentose metabolic process	P	1
isotig01979	GO:0007311	maternal specification of dorsal/ventral axis, oocyte, germ-line encoded	P	1
isotig01988	GO:0048662	negative regulation of smooth muscle cell proliferation	P	1
isotig01988	GO:0045669	positive regulation of osteoblast differentiation	P	1
isotig01988	GO:0050775	positive regulation of dendrite morphogenesis	P	1
isotig01988	GO:0030513	positive regulation of BMP signaling pathway	P	1
isotig01988	GO:0043406	positive regulation of MAP kinase activity	P	1
isotig01988	GO:0043410	positive regulation of MAPK cascade	P	1
isotig01988	GO:0090263	positive regulation of canonical Wnt receptor signaling pathway	P	1
isotig01988	GO:0034446	substrate adhesion-dependent cell spreading	P	1
isotig01988	GO:0006469	negative regulation of protein kinase activity	P	1
isotig01988	GO:0032288	myelin assembly	P	1
isotig01988	GO:0030335	positive regulation of cell migration	P	1
isotig01988	GO:0001658	branching involved in ureteric bud morphogenesis	P	1
isotig01988	GO:0045663	positive regulation of myoblast differentiation	P	1
isotig01988	GO:0010667	negative regulation of cardiac muscle cell apoptotic process	P	1
isotig01988	GO:0001954	positive regulation of cell-matrix adhesion	P	1
isotig01988	GO:0045773	positive regulation of axon extension	P	1
isotig02022	GO:0006565	L-serine catabolic process	P	1
isotig02022	GO:0006544	glycine metabolic process	P	1
isotig02022	GO:0009113	purine nucleobase biosynthetic process	P	1
isotig02022	GO:0046655	folic acid metabolic process	P	1
isotig02022	GO:0035999	tetrahydrofolate interconversion	P	1
isotig02022	GO:0051262	protein tetramerization	P	1
isotig02037	GO:0001174	transcriptional start site selection at RNA polymerase II promoter	P	1
isotig02047	GO:0006172	ADP biosynthetic process	P	1
isotig02063	GO:0046843	dorsal appendage formation	P	1
isotig02068	GO:0051259	protein oligomerization	P	1
isotig02068	GO:0007588	excretion	P	1
isotig02078	GO:0031053	primary miRNA processing	P	1
isotig02085	GO:0006027	glycosaminoglycan catabolic process	P	1
isotig02095	GO:0090207	regulation of triglyceride metabolic process	P	1
isotig02095	GO:0010883	regulation of lipid storage	P	1
isotig02095	GO:0046339	diacylglycerol metabolic process	P	1
isotig02095	GO:0046890	regulation of lipid biosynthetic process	P	1
isotig02095	GO:0046473	phosphatidic acid metabolic process	P	1
isotig02113	GO:0019464	glycine decarboxylation via glycine cleavage system	P	1
isotig02114	GO:0007267	cell-cell signaling	P	1
isotig02114	GO:0007318	pole plasm protein localization	P	1
isotig02114	GO:0046594	maintenance of pole plasm mRNA location	P	1
isotig02115	GO:0042866	pyruvate biosynthetic process	P	1
isotig02115	GO:0042853	L-alanine catabolic process	P	1
isotig02115	GO:0006625	protein targeting to peroxisome	P	1
isotig02115	GO:0009436	glyoxylate catabolic process	P	1
isotig02115	GO:0019265	glycine biosynthetic process, by transamination of glyoxylate	P	1
isotig02115	GO:0046724	oxalic acid secretion	P	1
isotig02135	GO:0033574	response to testosterone stimulus	P	1
isotig02135	GO:0009612	response to mechanical stimulus	P	1
isotig02135	GO:0006564	L-serine biosynthetic process	P	1
isotig02142	GO:0009636	response to toxin	P	1
isotig02151	GO:0046296	glycolate catabolic process	P	1
isotig02151	GO:0001561	fatty acid alpha-oxidation	P	1
isotig02165	GO:0030717	karyosome formation	P	1
isotig02173	GO:0000096	sulfur amino acid metabolic process	P	1
isotig02173	GO:0009063	cellular amino acid catabolic process	P	1
isotig02173	GO:0009069	serine family amino acid metabolic process	P	1
isotig02190	GO:0042769	DNA damage response, detection of DNA damage	P	1
isotig02206	GO:0030010	establishment of cell polarity	P	1
isotig02208	GO:0042273	ribosomal large subunit biogenesis	P	1
isotig02220	GO:0030432	peristalsis	P	1
isotig02220	GO:0008345	larval locomotory behavior	P	1
isotig02221	GO:0044154	histone H3-K14 acetylation	P	1
isotig02221	GO:0043983	histone H4-K12 acetylation	P	1
isotig02221	GO:0043968	histone H2A acetylation	P	1
isotig02222	GO:0035909	aorta morphogenesis	P	1
isotig02222	GO:2000587	negative regulation of platelet-derived growth factor receptor-beta signaling pathway	P	1
isotig02222	GO:0032429	regulation of phospholipase A2 activity	P	1
isotig02222	GO:0043277	apoptotic cell clearance	P	1
isotig02230	GO:0006865	amino acid transport	P	1
isotig02237	GO:0061060	negative regulation of peptidoglycan recognition protein signaling pathway	P	1
isotig02237	GO:0000270	peptidoglycan metabolic process	P	1
isotig02237	GO:0050830	defense response to Gram-positive bacterium	P	1
isotig02238	GO:0033600	negative regulation of mammary gland epithelial cell proliferation	P	1
isotig02238	GO:0060762	regulation of branching involved in mammary gland duct morphogenesis	P	1
isotig02238	GO:0060749	mammary gland alveolus development	P	1
isotig02238	GO:0033147	negative regulation of intracellular estrogen receptor signaling pathway	P	1
isotig02238	GO:0060744	mammary gland branching involved in thelarche	P	1
isotig02242	GO:0048147	negative regulation of fibroblast proliferation	P	1
isotig02247	GO:0030514	negative regulation of BMP signaling pathway	P	1
isotig02247	GO:0051146	striated muscle cell differentiation	P	1
isotig02247	GO:0001756	somitogenesis	P	1
isotig02247	GO:0008015	blood circulation	P	1
isotig02247	GO:0042694	muscle cell fate specification	P	1
isotig02295	GO:0052695	cellular glucuronidation	P	1
isotig02309	GO:0051354	negative regulation of oxidoreductase activity	P	1
isotig02319	GO:0001522	pseudouridine synthesis	P	1
isotig02324	GO:0006419	alanyl-tRNA aminoacylation	P	1
isotig02333	GO:0000272	polysaccharide catabolic process	P	1
isotig02333	GO:0006030	chitin metabolic process	P	1
isotig02337	GO:0051084	'de novo' posttranslational protein folding	P	1
isotig02338	GO:0030097	hemopoiesis	P	1
isotig02338	GO:0006041	glucosamine metabolic process	P	1
isotig02338	GO:0006488	dolichol-linked oligosaccharide biosynthetic process	P	1
isotig02339	GO:0009765	photosynthesis, light harvesting	P	1
isotig02339	GO:0018298	protein-chromophore linkage	P	1
isotig02363	GO:0009966	regulation of signal transduction	P	1
isotig02386	GO:0006360	transcription from RNA polymerase I promoter	P	1
isotig02391	GO:0048066	developmental pigmentation	P	1
isotig02391	GO:0015872	dopamine transport	P	1
isotig02391	GO:0042402	cellular biogenic amine catabolic process	P	1
isotig02391	GO:0006584	catecholamine metabolic process	P	1
isotig02415	GO:0006909	phagocytosis	P	1
isotig02415	GO:0022610	biological adhesion	P	1
isotig02421	GO:0000079	regulation of cyclin-dependent protein kinase activity	P	1
isotig02425	GO:0006367	transcription initiation from RNA polymerase II promoter	P	1
isotig02425	GO:0070365	hepatocyte differentiation	P	1
isotig02425	GO:0016578	histone deubiquitination	P	1
isotig02425	GO:0043623	cellular protein complex assembly	P	1
isotig02425	GO:0043966	histone H3 acetylation	P	1
isotig02444	GO:0006399	tRNA metabolic process	P	1
isotig02450	GO:0003333	amino acid transmembrane transport	P	1
isotig02450	GO:0015824	proline transport	P	1
isotig02472	GO:0042335	cuticle development	P	1
isotig02472	GO:0042446	hormone biosynthetic process	P	1
isotig02472	GO:0042554	superoxide anion generation	P	1
isotig02472	GO:0006590	thyroid hormone generation	P	1
isotig02497	GO:0006793	phosphorus metabolic process	P	1
isotig02515	GO:0000255	allantoin metabolic process	P	1
isotig02515	GO:0042104	positive regulation of activated T cell proliferation	P	1
isotig02515	GO:0006600	creatine metabolic process	P	1
isotig02515	GO:0045885	positive regulation of survival gene product expression	P	1
isotig02515	GO:0070670	response to interleukin-4	P	1
isotig02515	GO:0006549	isoleucine metabolic process	P	1
isotig02515	GO:0070669	response to interleukin-2	P	1
isotig02515	GO:0060397	JAK-STAT cascade involved in growth hormone signaling pathway	P	1
isotig02515	GO:0046449	creatinine metabolic process	P	1
isotig02515	GO:0048541	Peyer's patch development	P	1
isotig02515	GO:0046544	development of secondary male sexual characteristics	P	1
isotig02515	GO:0019530	taurine metabolic process	P	1
isotig02515	GO:0046543	development of secondary female sexual characteristics	P	1
isotig02515	GO:0033077	T cell differentiation in thymus	P	1
isotig02515	GO:0045588	positive regulation of gamma-delta T cell differentiation	P	1
isotig02515	GO:0032825	positive regulation of natural killer cell differentiation	P	1
isotig02515	GO:0070672	response to interleukin-15	P	1
isotig02515	GO:0006107	oxaloacetate metabolic process	P	1
isotig02515	GO:0040018	positive regulation of multicellular organism growth	P	1
isotig02515	GO:0030856	regulation of epithelial cell differentiation	P	1
isotig02515	GO:0045954	positive regulation of natural killer cell mediated cytotoxicity	P	1
isotig02515	GO:0045931	positive regulation of mitotic cell cycle	P	1
isotig02515	GO:0045579	positive regulation of B cell differentiation	P	1
isotig02515	GO:0050729	positive regulation of inflammatory response	P	1
isotig02515	GO:0032355	response to estradiol stimulus	P	1
isotig02515	GO:0045086	positive regulation of interleukin-2 biosynthetic process	P	1
isotig02515	GO:0043029	T cell homeostasis	P	1
isotig02515	GO:0042448	progesterone metabolic process	P	1
isotig02515	GO:0032819	positive regulation of natural killer cell proliferation	P	1
isotig02515	GO:0007595	lactation	P	1
isotig02515	GO:0045647	negative regulation of erythrocyte differentiation	P	1
isotig02520	GO:0001302	replicative cell aging	P	1
isotig02520	GO:2000379	positive regulation of reactive oxygen species metabolic process	P	1
isotig02520	GO:0034614	cellular response to reactive oxygen species	P	1
isotig02522	GO:0010642	negative regulation of platelet-derived growth factor receptor signaling pathway	P	1
isotig02522	GO:0051049	regulation of transport	P	1
isotig02522	GO:0014067	negative regulation of phosphatidylinositol 3-kinase cascade	P	1
isotig02522	GO:2000146	negative regulation of cell motility	P	1
isotig02522	GO:0034635	glutathione transport	P	1
isotig02522	GO:0070293	renal absorption	P	1
isotig02522	GO:0032782	bile acid secretion	P	1
isotig02522	GO:0051898	negative regulation of protein kinase B signaling cascade	P	1
isotig02569	GO:0007426	tracheal outgrowth, open tracheal system	P	1
isotig02601	GO:0016236	macroautophagy	P	1
isotig02601	GO:0006996	organelle organization	P	1
isotig02622	GO:0048025	negative regulation of nuclear mRNA splicing, via spliceosome	P	1
isotig02625	GO:0010324	membrane invagination	P	1
isotig02625	GO:0048268	clathrin coat assembly	P	1
isotig02625	GO:0072659	protein localization in plasma membrane	P	1
isotig02635	GO:0042998	positive regulation of Golgi to plasma membrane protein transport	P	1
isotig02635	GO:0019432	triglyceride biosynthetic process	P	1
isotig02635	GO:0035338	long-chain fatty-acyl-CoA biosynthetic process	P	1
isotig02673	GO:0051216	cartilage development	P	1
isotig02673	GO:0035138	pectoral fin morphogenesis	P	1
isotig02673	GO:0048702	embryonic neurocranium morphogenesis	P	1
isotig02705	GO:0048011	nerve growth factor receptor signaling pathway	P	1
isotig02705	GO:0008286	insulin receptor signaling pathway	P	1
isotig02740	GO:0072321	chaperone-mediated protein transport	P	1
isotig02773	GO:0016556	mRNA modification	P	1
isotig02774	GO:0051236	establishment of RNA localization	P	1
isotig02774	GO:0043488	regulation of mRNA stability	P	1
isotig02774	GO:0048489	synaptic vesicle transport	P	1
isotig02774	GO:0000245	spliceosomal complex assembly	P	1
isotig02774	GO:0050808	synapse organization	P	1
isotig02774	GO:0007274	neuromuscular synaptic transmission	P	1
isotig02782	GO:0046209	nitric oxide metabolic process	P	1
isotig02782	GO:0050999	regulation of nitric-oxide synthase activity	P	1
isotig02783	GO:0015014	heparan sulfate proteoglycan biosynthetic process, polysaccharide chain biosynthetic process	P	1
isotig02783	GO:0008101	decapentaplegic signaling pathway	P	1
isotig02798	GO:0071108	protein K48-linked deubiquitination	P	1
isotig02802	GO:0009725	response to hormone stimulus	P	1
isotig02802	GO:0014823	response to activity	P	1
isotig02802	GO:0046952	ketone body catabolic process	P	1
isotig02802	GO:0071229	cellular response to acid	P	1
isotig02802	GO:0071333	cellular response to glucose stimulus	P	1
isotig02802	GO:0060612	adipose tissue development	P	1
isotig02802	GO:0032024	positive regulation of insulin secretion	P	1
isotig02805	GO:0048190	wing disc dorsal/ventral pattern formation	P	1
isotig02805	GO:0009411	response to UV	P	1
isotig02805	GO:0007088	regulation of mitosis	P	1
isotig02805	GO:0046958	nonassociative learning	P	1
isotig02845	GO:0006435	threonyl-tRNA aminoacylation	P	1
isotig02866	GO:0090044	positive regulation of tubulin deacetylation	P	1
isotig02866	GO:0007179	transforming growth factor beta receptor signaling pathway	P	1
isotig02866	GO:0090045	positive regulation of deacetylase activity	P	1
isotig02866	GO:0018344	protein geranylgeranylation	P	1
isotig02866	GO:0018343	protein farnesylation	P	1
isotig02879	GO:0010815	bradykinin catabolic process	P	1
isotig02882	GO:0006907	pinocytosis	P	1
isotig02882	GO:0002084	protein depalmitoylation	P	1
isotig02888	GO:0072375	medium-term memory	P	1
isotig02906	GO:0002561	basophil degranulation	P	1
isotig02906	GO:0006661	phosphatidylinositol biosynthetic process	P	1
isotig02907	GO:0042766	nucleosome mobilization	P	1
isotig02914	GO:0030497	fatty acid elongation	P	1
isotig02927	GO:0007100	mitotic centrosome separation	P	1
isotig02927	GO:0045842	positive regulation of mitotic metaphase/anaphase transition	P	1
isotig02927	GO:0008406	gonad development	P	1
isotig02939	GO:0019046	reactivation of latent virus	P	1
isotig02939	GO:0043254	regulation of protein complex assembly	P	1
isotig02939	GO:0045787	positive regulation of cell cycle	P	1
isotig02944	GO:0007362	terminal region determination	P	1
isotig02944	GO:0017015	regulation of transforming growth factor beta receptor signaling pathway	P	1
isotig02945	GO:0007126	meiosis	P	1
isotig02951	GO:0016926	protein desumoylation	P	1
isotig02952	GO:0010876	lipid localization	P	1
isotig02953	GO:0055082	cellular chemical homeostasis	P	1
isotig02953	GO:0035176	social behavior	P	1
isotig02988	GO:0019216	regulation of lipid metabolic process	P	1
isotig02988	GO:0045446	endothelial cell differentiation	P	1
isotig02993	GO:0006906	vesicle fusion	P	1
isotig02993	GO:0017156	calcium ion-dependent exocytosis	P	1
isotig02993	GO:0043308	eosinophil degranulation	P	1
isotig02993	GO:0043312	neutrophil degranulation	P	1
isotig02997	GO:0006430	lysyl-tRNA aminoacylation	P	1
isotig03012	GO:1901137	carbohydrate derivative biosynthetic process	P	1
isotig03047	GO:0006148	inosine catabolic process	P	1
isotig03047	GO:0006738	nicotinamide riboside catabolic process	P	1
isotig03047	GO:0042102	positive regulation of T cell proliferation	P	1
isotig03047	GO:0006195	purine nucleotide catabolic process	P	1
isotig03047	GO:0070970	interleukin-2 secretion	P	1
isotig03047	GO:0034418	urate biosynthetic process	P	1
isotig03047	GO:0043101	purine-containing compound salvage	P	1
isotig03047	GO:0034356	NAD biosynthesis via nicotinamide riboside salvage pathway	P	1
isotig03047	GO:0046638	positive regulation of alpha-beta T cell differentiation	P	1
isotig03054	GO:0006987	activation of signaling protein activity involved in unfolded protein response	P	1
isotig03057	GO:0046939	nucleotide phosphorylation	P	1
isotig03060	GO:0040013	negative regulation of locomotion	P	1
isotig03062	GO:0030431	sleep	P	1
isotig03062	GO:0051438	regulation of ubiquitin-protein ligase activity	P	1
isotig03062	GO:0030162	regulation of proteolysis	P	1
isotig03067	GO:0040029	regulation of gene expression, epigenetic	P	1
isotig03067	GO:0034773	histone H4-K20 trimethylation	P	1
isotig03067	GO:0034772	histone H4-K20 dimethylation	P	1
isotig03079	GO:0007040	lysosome organization	P	1
isotig03079	GO:0006605	protein targeting	P	1
isotig03079	GO:0007034	vacuolar transport	P	1
isotig03103	GO:0010133	proline catabolic process to glutamate	P	1
isotig03103	GO:0006561	proline biosynthetic process	P	1
isotig03109	GO:0001745	compound eye morphogenesis	P	1
isotig03109	GO:0045165	cell fate commitment	P	1
isotig03109	GO:0048468	cell development	P	1
isotig03109	GO:0002009	morphogenesis of an epithelium	P	1
isotig03109	GO:0042058	regulation of epidermal growth factor receptor signaling pathway	P	1
isotig03154	GO:0045806	negative regulation of endocytosis	P	1
isotig03168	GO:0001654	eye development	P	1
isotig03174	GO:0018130	heterocycle biosynthetic process	P	1
isotig03174	GO:0044271	cellular nitrogen compound biosynthetic process	P	1
isotig03174	GO:0006760	folic acid-containing compound metabolic process	P	1
isotig03185	GO:0045047	protein targeting to ER	P	1
isotig03192	GO:0030308	negative regulation of cell growth	P	1
isotig03227	GO:0006598	polyamine catabolic process	P	1
isotig03248	GO:0008033	tRNA processing	P	1
isotig03259	GO:0006825	copper ion transport	P	1
isotig03278	GO:0042760	very long-chain fatty acid catabolic process	P	1
isotig03278	GO:0032000	positive regulation of fatty acid beta-oxidation	P	1
isotig03279	GO:0070125	mitochondrial translational elongation	P	1
isotig03285	GO:0033540	fatty acid beta-oxidation using acyl-CoA oxidase	P	1
isotig03286	GO:0021536	diencephalon development	P	1
isotig03323	GO:0000302	response to reactive oxygen species	P	1
isotig03323	GO:0046292	formaldehyde metabolic process	P	1
isotig03323	GO:0008544	epidermis development	P	1
isotig03323	GO:0033306	phytol metabolic process	P	1
isotig03347	GO:0032008	positive regulation of TOR signaling cascade	P	1
isotig03347	GO:0034613	cellular protein localization	P	1
isotig03347	GO:0071230	cellular response to amino acid stimulus	P	1
isotig03352	GO:0033598	mammary gland epithelial cell proliferation	P	1
isotig03352	GO:0071407	cellular response to organic cyclic compound	P	1
isotig03352	GO:0031648	protein destabilization	P	1
isotig03352	GO:0043433	negative regulation of sequence-specific DNA binding transcription factor activity	P	1
isotig03352	GO:0042753	positive regulation of circadian rhythm	P	1
isotig03352	GO:0061136	regulation of proteasomal protein catabolic process	P	1
isotig03352	GO:0060444	branching involved in mammary gland duct morphogenesis	P	1
isotig03352	GO:0045862	positive regulation of proteolysis	P	1
isotig03352	GO:0043122	regulation of I-kappaB kinase/NF-kappaB cascade	P	1
isotig03352	GO:0045879	negative regulation of smoothened signaling pathway	P	1
isotig03365	GO:0046426	negative regulation of JAK-STAT cascade	P	1
isotig03375	GO:0006426	glycyl-tRNA aminoacylation	P	1
isotig03375	GO:0015966	diadenosine tetraphosphate biosynthetic process	P	1
isotig03382	GO:0002176	male germ cell proliferation	P	1
isotig03382	GO:0008584	male gonad development	P	1
isotig03395	GO:0042787	protein ubiquitination involved in ubiquitin-dependent protein catabolic process	P	1
isotig03397	GO:0012501	programmed cell death	P	1
isotig03398	GO:0090161	Golgi ribbon formation	P	1
isotig03418	GO:0005998	xylulose catabolic process	P	1
isotig03420	GO:0046513	ceramide biosynthetic process	P	1
isotig03427	GO:0060070	canonical Wnt receptor signaling pathway	P	1
isotig03437	GO:0019483	beta-alanine biosynthetic process	P	1
isotig03444	GO:0015767	lactose transport	P	1
isotig03444	GO:0015768	maltose transport	P	1
isotig03444	GO:0015770	sucrose transport	P	1
isotig03445	GO:0043547	positive regulation of GTPase activity	P	1
isotig03455	GO:0000279	M phase	P	1
isotig03473	GO:0001946	lymphangiogenesis	P	1
isotig03481	GO:0051704	multi-organism process	P	1
isotig03488	GO:0006449	regulation of translational termination	P	1
isotig03498	GO:0007530	sex determination	P	1
isotig03498	GO:0016543	male courtship behavior, orientation prior to leg tapping and wing vibration	P	1
isotig03498	GO:0048047	mating behavior, sex discrimination	P	1
isotig03498	GO:0002118	aggressive behavior	P	1
isotig03498	GO:0045433	male courtship behavior, veined wing generated song production	P	1
isotig03498	GO:0007620	copulation	P	1
isotig03498	GO:0046661	male sex differentiation	P	1
isotig03534	GO:0008356	asymmetric cell division	P	1
isotig03545	GO:0033539	fatty acid beta-oxidation using acyl-CoA dehydrogenase	P	1
isotig03572	GO:0033566	gamma-tubulin complex localization	P	1
isotig03575	GO:0036010	protein localization in endosome	P	1
isotig03575	GO:0070863	positive regulation of protein exit from endoplasmic reticulum	P	1
isotig03599	GO:0015979	photosynthesis	P	1
isotig03617	GO:0010886	positive regulation of cholesterol storage	P	1
isotig03617	GO:0010744	positive regulation of macrophage derived foam cell differentiation	P	1
isotig03653	GO:0045662	negative regulation of myoblast differentiation	P	1
isotig03654	GO:0019859	thymine metabolic process	P	1
isotig03661	GO:0006702	androgen biosynthetic process	P	1
isotig03661	GO:0071248	cellular response to metal ion	P	1
isotig03661	GO:0006703	estrogen biosynthetic process	P	1
isotig03661	GO:0060348	bone development	P	1
isotig03693	GO:0006659	phosphatidylserine biosynthetic process	P	1
isotig03693	GO:0030168	platelet activation	P	1
isotig03693	GO:0017121	phospholipid scrambling	P	1
isotig03693	GO:0051607	defense response to virus	P	1
isotig03693	GO:0033003	regulation of mast cell activation	P	1
isotig03693	GO:0045089	positive regulation of innate immune response	P	1
isotig03693	GO:2000373	positive regulation of DNA topoisomerase (ATP-hydrolyzing) activity	P	1
isotig03693	GO:0045071	negative regulation of viral genome replication	P	1
isotig03693	GO:0060368	regulation of Fc receptor mediated stimulatory signaling pathway	P	1
isotig03693	GO:0035456	response to interferon-beta	P	1
isotig03694	GO:0009100	glycoprotein metabolic process	P	1
isotig03719	GO:0045768	positive regulation of anti-apoptosis	P	1
isotig03719	GO:0019722	calcium-mediated signaling	P	1
isotig03722	GO:0051001	negative regulation of nitric-oxide synthase activity	P	1
isotig03732	GO:0007000	nucleolus organization	P	1
isotig03732	GO:0033979	box H/ACA snoRNA metabolic process	P	1
isotig03732	GO:0006970	response to osmotic stress	P	1
isotig03744	GO:0032092	positive regulation of protein binding	P	1
isotig03744	GO:0043392	negative regulation of DNA binding	P	1
isotig03744	GO:0045040	protein import into mitochondrial outer membrane	P	1
isotig03815	GO:0048542	lymph gland development	P	1
isotig03815	GO:0045451	pole plasm oskar mRNA localization	P	1
isotig03815	GO:0030182	neuron differentiation	P	1
isotig03848	GO:0032784	regulation of DNA-dependent transcription, elongation	P	1
isotig03902	GO:0044211	CTP salvage	P	1
isotig03902	GO:0044206	UMP salvage	P	1
isotig03911	GO:0016572	histone phosphorylation	P	1
isotig03911	GO:0000236	mitotic prometaphase	P	1
isotig03911	GO:0045448	mitotic cell cycle, embryonic	P	1
isotig03927	GO:0006572	tyrosine catabolic process	P	1
isotig03927	GO:0006527	arginine catabolic process	P	1
isotig03945	GO:0009820	alkaloid metabolic process	P	1
isotig03951	GO:0009414	response to water deprivation	P	1
isotig03951	GO:0051865	protein autoubiquitination	P	1
isotig03968	GO:0030838	positive regulation of actin filament polymerization	P	1
isotig03968	GO:0032868	response to insulin stimulus	P	1
isotig03968	GO:0032314	regulation of Rac GTPase activity	P	1
isotig03968	GO:0045945	positive regulation of transcription from RNA polymerase III promoter	P	1
isotig03968	GO:0051534	negative regulation of NFAT protein import into nucleus	P	1
isotig03968	GO:0043610	regulation of carbohydrate utilization	P	1
isotig03968	GO:0032095	regulation of response to food	P	1
isotig03968	GO:0018107	peptidyl-threonine phosphorylation	P	1
isotig03968	GO:0031529	ruffle organization	P	1
isotig03968	GO:0050731	positive regulation of peptidyl-tyrosine phosphorylation	P	1
isotig03968	GO:0031998	regulation of fatty acid beta-oxidation	P	1
isotig03968	GO:0051496	positive regulation of stress fiber assembly	P	1
isotig03968	GO:0007281	germ cell development	P	1
isotig03968	GO:0046777	protein autophosphorylation	P	1
isotig03968	GO:0010592	positive regulation of lamellipodium assembly	P	1
isotig03968	GO:0031929	TOR signaling cascade	P	1
isotig03968	GO:0045792	negative regulation of cell size	P	1
isotig03968	GO:0010831	positive regulation of myotube differentiation	P	1
isotig03968	GO:0016242	negative regulation of macroautophagy	P	1
isotig03968	GO:0001938	positive regulation of endothelial cell proliferation	P	1
isotig03999	GO:0018342	protein prenylation	P	1
isotig04012	GO:0008631	induction of apoptosis by oxidative stress	P	1
isotig04012	GO:0051775	response to redox state	P	1
isotig04020	GO:0019367	fatty acid elongation, saturated fatty acid	P	1
isotig04020	GO:0034626	fatty acid elongation, polyunsaturated fatty acid	P	1
isotig04020	GO:0042761	very long-chain fatty acid biosynthetic process	P	1
isotig04026	GO:0007599	hemostasis	P	1
isotig04029	GO:0046498	S-adenosylhomocysteine metabolic process	P	1
isotig04029	GO:0006555	methionine metabolic process	P	1
isotig04029	GO:0006111	regulation of gluconeogenesis	P	1
isotig04029	GO:0046500	S-adenosylmethionine metabolic process	P	1
isotig04037	GO:0007614	short-term memory	P	1
isotig04042	GO:0048739	cardiac muscle fiber development	P	1
isotig04042	GO:0048769	sarcomerogenesis	P	1
isotig04042	GO:0055003	cardiac myofibril assembly	P	1
isotig04042	GO:0006936	muscle contraction	P	1
isotig04042	GO:0030240	skeletal muscle thin filament assembly	P	1
isotig04042	GO:0055008	cardiac muscle tissue morphogenesis	P	1
isotig04048	GO:0010214	seed coat development	P	1
isotig04048	GO:0030244	cellulose biosynthetic process	P	1
isotig04048	GO:0009832	plant-type cell wall biogenesis	P	1
isotig04117	GO:0032237	activation of store-operated calcium channel activity	P	1
isotig04134	GO:0034369	plasma lipoprotein particle remodeling	P	1
isotig04134	GO:0031323	regulation of cellular metabolic process	P	1
isotig04134	GO:0009889	regulation of biosynthetic process	P	1
isotig04150	GO:0051239	regulation of multicellular organismal process	P	1
isotig04150	GO:0042063	gliogenesis	P	1
isotig04154	GO:0019099	female germ-line sex determination	P	1
isotig04154	GO:0007539	primary sex determination, soma	P	1
isotig04164	GO:0042149	cellular response to glucose starvation	P	1
isotig04166	GO:0000103	sulfate assimilation	P	1
isotig04190	GO:0051683	establishment of Golgi localization	P	1
isotig04190	GO:0072384	organelle transport along microtubule	P	1
isotig04213	GO:0046822	regulation of nucleocytoplasmic transport	P	1
isotig04213	GO:0032922	circadian regulation of gene expression	P	1
isotig04213	GO:0035278	negative regulation of translation involved in gene silencing by miRNA	P	1
isotig04213	GO:0045947	negative regulation of translational initiation	P	1
isotig04213	GO:0032055	negative regulation of translation in response to stress	P	1
isotig04213	GO:0043153	entrainment of circadian clock by photoperiod	P	1
isotig04213	GO:0051149	positive regulation of muscle cell differentiation	P	1
isotig04213	GO:0051403	stress-activated MAPK cascade	P	1
isotig04223	GO:0000086	G2/M transition of mitotic cell cycle	P	1
isotig04223	GO:0070544	histone H3-K36 demethylation	P	1
isotig04239	GO:0070584	mitochondrion morphogenesis	P	1
isotig04268	GO:0006813	potassium ion transport	P	1
isotig04268	GO:0007032	endosome organization	P	1
isotig04268	GO:0032510	endosome to lysosome transport via multivesicular body sorting pathway	P	1
isotig04314	GO:0050773	regulation of dendrite development	P	1
isotig04327	GO:0010867	positive regulation of triglyceride biosynthetic process	P	1
isotig04327	GO:0035307	positive regulation of protein dephosphorylation	P	1
isotig04358	GO:0042256	mature ribosome assembly	P	1
isotig04417	GO:0006611	protein export from nucleus	P	1
isotig04419	GO:0050434	positive regulation of viral transcription	P	1
isotig04419	GO:0010923	negative regulation of phosphatase activity	P	1
isotig00135	GO:0007094	mitotic cell cycle spindle assembly checkpoint	P	2
isotig00140	GO:0007094	mitotic cell cycle spindle assembly checkpoint	P	2
isotig00308	GO:0008355	olfactory learning	P	2
isotig00308	GO:0007435	salivary gland morphogenesis	P	2
isotig00308	GO:0090254	cell elongation involved in imaginal disc-derived wing morphogenesis	P	2
isotig00308	GO:0008354	germ cell migration	P	2
isotig00308	GO:0008045	motor axon guidance	P	2
isotig00314	GO:0007160	cell-matrix adhesion	P	2
isotig00314	GO:0065008	regulation of biological quality	P	2
isotig00316	GO:0042773	ATP synthesis coupled electron transport	P	2
isotig00322	GO:0007519	skeletal muscle tissue development	P	2
isotig00370	GO:0044249	cellular biosynthetic process	P	2
isotig00382	GO:0006801	superoxide metabolic process	P	2
isotig00386	GO:0007617	mating behavior	P	2
isotig00386	GO:0048511	rhythmic process	P	2
isotig00386	GO:0007631	feeding behavior	P	2
isotig00430	GO:0009052	pentose-phosphate shunt, non-oxidative branch	P	2
isotig00432	GO:0005978	glycogen biosynthetic process	P	2
isotig00504	GO:0046889	positive regulation of lipid biosynthetic process	P	2
isotig00518	GO:0030155	regulation of cell adhesion	P	2
isotig00518	GO:0005977	glycogen metabolic process	P	2
isotig00576	GO:0019852	L-ascorbic acid metabolic process	P	2
isotig00616	GO:0031667	response to nutrient levels	P	2
isotig00616	GO:0043200	response to amino acid stimulus	P	2
isotig00664	GO:0030837	negative regulation of actin filament polymerization	P	2
isotig00714	GO:0017055	negative regulation of RNA polymerase II transcriptional preinitiation complex assembly	P	2
isotig00714	GO:0006338	chromatin remodeling	P	2
isotig00714	GO:0043388	positive regulation of DNA binding	P	2
isotig00716	GO:0006417	regulation of translation	P	2
isotig00721	GO:0045187	regulation of circadian sleep/wake cycle, sleep	P	2
isotig00721	GO:0008293	torso signaling pathway	P	2
isotig00736	GO:0008049	male courtship behavior	P	2
isotig00736	GO:0009611	response to wounding	P	2
isotig00736	GO:0043052	thermotaxis	P	2
isotig00749	GO:0006144	purine nucleobase metabolic process	P	2
isotig00771	GO:0030968	endoplasmic reticulum unfolded protein response	P	2
isotig00773	GO:0022416	chaeta development	P	2
isotig00789	GO:0008063	Toll signaling pathway	P	2
isotig00789	GO:0016485	protein processing	P	2
isotig00789	GO:0040014	regulation of multicellular organism growth	P	2
isotig00791	GO:0006805	xenobiotic metabolic process	P	2
isotig00791	GO:0006069	ethanol oxidation	P	2
isotig00801	GO:0006097	glyoxylate cycle	P	2
isotig00802	GO:0006119	oxidative phosphorylation	P	2
isotig00805	GO:0006591	ornithine metabolic process	P	2
isotig00834	GO:0006097	glyoxylate cycle	P	2
isotig00856	GO:0006260	DNA replication	P	2
isotig00882	GO:0006633	fatty acid biosynthetic process	P	2
isotig00908	GO:0045595	regulation of cell differentiation	P	2
isotig00908	GO:0006917	induction of apoptosis	P	2
isotig00908	GO:0042127	regulation of cell proliferation	P	2
isotig00914	GO:0001886	endothelial cell morphogenesis	P	2
isotig00914	GO:0021915	neural tube development	P	2
isotig00914	GO:0060425	lung morphogenesis	P	2
isotig00914	GO:0030199	collagen fibril organization	P	2
isotig00914	GO:0048730	epidermis morphogenesis	P	2
isotig00914	GO:0042311	vasodilation	P	2
isotig00914	GO:0070831	basement membrane assembly	P	2
isotig00916	GO:0010038	response to metal ion	P	2
isotig00916	GO:0006559	L-phenylalanine catabolic process	P	2
isotig00919	GO:0007140	male meiosis	P	2
isotig00919	GO:0030718	germ-line stem cell maintenance	P	2
isotig00935	GO:0001886	endothelial cell morphogenesis	P	2
isotig00935	GO:0021915	neural tube development	P	2
isotig00935	GO:0060425	lung morphogenesis	P	2
isotig00935	GO:0030199	collagen fibril organization	P	2
isotig00935	GO:0048730	epidermis morphogenesis	P	2
isotig00935	GO:0042311	vasodilation	P	2
isotig00935	GO:0070831	basement membrane assembly	P	2
isotig00965	GO:0006887	exocytosis	P	2
isotig00975	GO:0005979	regulation of glycogen biosynthetic process	P	2
isotig00975	GO:0048754	branching morphogenesis of a tube	P	2
isotig00982	GO:0015693	magnesium ion transport	P	2
isotig00988	GO:0042773	ATP synthesis coupled electron transport	P	2
isotig01006	GO:0030837	negative regulation of actin filament polymerization	P	2
isotig01009	GO:0051716	cellular response to stimulus	P	2
isotig01009	GO:0009611	response to wounding	P	2
isotig01044	GO:0045197	establishment or maintenance of epithelial cell apical/basal polarity	P	2
isotig01059	GO:0007160	cell-matrix adhesion	P	2
isotig01070	GO:0032502	developmental process	P	2
isotig01077	GO:0006913	nucleocytoplasmic transport	P	2
isotig01087	GO:0010745	negative regulation of macrophage derived foam cell differentiation	P	2
isotig01087	GO:0034374	low-density lipoprotein particle remodeling	P	2
isotig01087	GO:0010872	regulation of cholesterol esterification	P	2
isotig01087	GO:0045542	positive regulation of cholesterol biosynthetic process	P	2
isotig01087	GO:0043691	reverse cholesterol transport	P	2
isotig01087	GO:0055091	phospholipid homeostasis	P	2
isotig01087	GO:0010888	negative regulation of lipid storage	P	2
isotig01087	GO:0034436	glycoprotein transport	P	2
isotig01087	GO:0034375	high-density lipoprotein particle remodeling	P	2
isotig01087	GO:0033700	phospholipid efflux	P	2
isotig01087	GO:0042987	amyloid precursor protein catabolic process	P	2
isotig01087	GO:0055099	response to high density lipoprotein particle stimulus	P	2
isotig01087	GO:0042632	cholesterol homeostasis	P	2
isotig01089	GO:0007610	behavior	P	2
isotig01091	GO:0008219	cell death	P	2
isotig01098	GO:0006913	nucleocytoplasmic transport	P	2
isotig01105	GO:0006890	retrograde vesicle-mediated transport, Golgi to ER	P	2
isotig01114	GO:0006914	autophagy	P	2
isotig01151	GO:0006805	xenobiotic metabolic process	P	2
isotig01151	GO:0019852	L-ascorbic acid metabolic process	P	2
isotig01159	GO:0035162	embryonic hemopoiesis	P	2
isotig01169	GO:0006637	acyl-CoA metabolic process	P	2
isotig01174	GO:0090254	cell elongation involved in imaginal disc-derived wing morphogenesis	P	2
isotig01197	GO:0007303	cytoplasmic transport, nurse cell to oocyte	P	2
isotig01197	GO:0051016	barbed-end actin filament capping	P	2
isotig01197	GO:0051490	negative regulation of filopodium assembly	P	2
isotig01203	GO:0007029	endoplasmic reticulum organization	P	2
isotig01203	GO:0016320	endoplasmic reticulum membrane fusion	P	2
isotig01217	GO:0006521	regulation of cellular amino acid metabolic process	P	2
isotig01217	GO:0051436	negative regulation of ubiquitin-protein ligase activity involved in mitotic cell cycle	P	2
isotig01217	GO:0002479	antigen processing and presentation of exogenous peptide antigen via MHC class I, TAP-dependent	P	2
isotig01217	GO:0000084	S phase of mitotic cell cycle	P	2
isotig01217	GO:0000216	M/G1 transition of mitotic cell cycle	P	2
isotig01217	GO:0016071	mRNA metabolic process	P	2
isotig01217	GO:0006977	DNA damage response, signal transduction by p53 class mediator resulting in cell cycle arrest	P	2
isotig01231	GO:0007507	heart development	P	2
isotig01233	GO:0019509	L-methionine salvage from methylthioadenosine	P	2
isotig01239	GO:0045860	positive regulation of protein kinase activity	P	2
isotig01243	GO:0007610	behavior	P	2
isotig01245	GO:0031065	positive regulation of histone deacetylation	P	2
isotig01245	GO:0007500	mesodermal cell fate determination	P	2
isotig01245	GO:0007443	Malpighian tubule morphogenesis	P	2
isotig01245	GO:0007501	mesodermal cell fate specification	P	2
isotig01245	GO:0007375	anterior midgut invagination	P	2
isotig01245	GO:0007163	establishment or maintenance of cell polarity	P	2
isotig01245	GO:0030034	microvillar actin bundle assembly	P	2
isotig01245	GO:0007499	ectoderm and mesoderm interaction	P	2
isotig01245	GO:0007450	dorsal/ventral pattern formation, imaginal disc	P	2
isotig01245	GO:0035017	cuticle pattern formation	P	2
isotig01245	GO:0008407	chaeta morphogenesis	P	2
isotig01245	GO:0048800	antennal morphogenesis	P	2
isotig01249	GO:0006521	regulation of cellular amino acid metabolic process	P	2
isotig01249	GO:0051436	negative regulation of ubiquitin-protein ligase activity involved in mitotic cell cycle	P	2
isotig01249	GO:0002479	antigen processing and presentation of exogenous peptide antigen via MHC class I, TAP-dependent	P	2
isotig01249	GO:0000084	S phase of mitotic cell cycle	P	2
isotig01249	GO:0000216	M/G1 transition of mitotic cell cycle	P	2
isotig01249	GO:0016071	mRNA metabolic process	P	2
isotig01249	GO:0006977	DNA damage response, signal transduction by p53 class mediator resulting in cell cycle arrest	P	2
isotig01254	GO:0007617	mating behavior	P	2
isotig01254	GO:0048511	rhythmic process	P	2
isotig01254	GO:0007631	feeding behavior	P	2
isotig01278	GO:0042067	establishment of ommatidial planar polarity	P	2
isotig01278	GO:0016319	mushroom body development	P	2
isotig01278	GO:0036011	imaginal disc-derived leg segmentation	P	2
isotig01278	GO:0030041	actin filament polymerization	P	2
isotig01278	GO:0000915	cytokinesis, actomyosin contractile ring assembly	P	2
isotig01278	GO:0030042	actin filament depolymerization	P	2
isotig01281	GO:0010496	intercellular transport	P	2
isotig01322	GO:0043526	neuroprotection	P	2
isotig01327	GO:0006637	acyl-CoA metabolic process	P	2
isotig01339	GO:0010745	negative regulation of macrophage derived foam cell differentiation	P	2
isotig01339	GO:0034374	low-density lipoprotein particle remodeling	P	2
isotig01339	GO:0010872	regulation of cholesterol esterification	P	2
isotig01339	GO:0045542	positive regulation of cholesterol biosynthetic process	P	2
isotig01339	GO:0043691	reverse cholesterol transport	P	2
isotig01339	GO:0055091	phospholipid homeostasis	P	2
isotig01339	GO:0010888	negative regulation of lipid storage	P	2
isotig01339	GO:0034436	glycoprotein transport	P	2
isotig01339	GO:0034375	high-density lipoprotein particle remodeling	P	2
isotig01339	GO:0033700	phospholipid efflux	P	2
isotig01339	GO:0042987	amyloid precursor protein catabolic process	P	2
isotig01339	GO:0055099	response to high density lipoprotein particle stimulus	P	2
isotig01339	GO:0042632	cholesterol homeostasis	P	2
isotig01344	GO:0010496	intercellular transport	P	2
isotig01347	GO:0006091	generation of precursor metabolites and energy	P	2
isotig01354	GO:0072347	response to anesthetic	P	2
isotig01354	GO:0007629	flight behavior	P	2
isotig01354	GO:0007625	grooming behavior	P	2
isotig01354	GO:0008594	photoreceptor cell morphogenesis	P	2
isotig01354	GO:0007412	axon target recognition	P	2
isotig01354	GO:0007630	jump response	P	2
isotig01385	GO:0009953	dorsal/ventral pattern formation	P	2
isotig01435	GO:0006417	regulation of translation	P	2
isotig01480	GO:0022414	reproductive process	P	2
isotig01499	GO:0007059	chromosome segregation	P	2
isotig01506	GO:0003012	muscle system process	P	2
isotig01524	GO:0045176	apical protein localization	P	2
isotig01529	GO:0007303	cytoplasmic transport, nurse cell to oocyte	P	2
isotig01550	GO:0006801	superoxide metabolic process	P	2
isotig01552	GO:0006892	post-Golgi vesicle-mediated transport	P	2
isotig01558	GO:0008340	determination of adult lifespan	P	2
isotig01558	GO:0008355	olfactory learning	P	2
isotig01558	GO:0008045	motor axon guidance	P	2
isotig01558	GO:0030241	skeletal muscle myosin thick filament assembly	P	2
isotig01574	GO:0048132	female germ-line stem cell division	P	2
isotig01578	GO:0019509	L-methionine salvage from methylthioadenosine	P	2
isotig01590	GO:0006954	inflammatory response	P	2
isotig01590	GO:0043170	macromolecule metabolic process	P	2
isotig01590	GO:0065009	regulation of molecular function	P	2
isotig01590	GO:0034599	cellular response to oxidative stress	P	2
isotig01600	GO:0044262	cellular carbohydrate metabolic process	P	2
isotig01602	GO:0009953	dorsal/ventral pattern formation	P	2
isotig01615	GO:0070979	protein K11-linked ubiquitination	P	2
isotig01626	GO:0051881	regulation of mitochondrial membrane potential	P	2
isotig01626	GO:0051092	positive regulation of NF-kappaB transcription factor activity	P	2
isotig01638	GO:0006729	tetrahydrobiopterin biosynthetic process	P	2
isotig01639	GO:0031647	regulation of protein stability	P	2
isotig01639	GO:0048132	female germ-line stem cell division	P	2
isotig01639	GO:0051276	chromosome organization	P	2
isotig01639	GO:0007286	spermatid development	P	2
isotig01639	GO:0007140	male meiosis	P	2
isotig01639	GO:0030718	germ-line stem cell maintenance	P	2
isotig01681	GO:0007569	cell aging	P	2
isotig01702	GO:0007584	response to nutrient	P	2
isotig01702	GO:0051384	response to glucocorticoid stimulus	P	2
isotig01706	GO:0005978	glycogen biosynthetic process	P	2
isotig01709	GO:0006921	cellular component disassembly involved in apoptotic process	P	2
isotig01712	GO:0051092	positive regulation of NF-kappaB transcription factor activity	P	2
isotig01725	GO:0006406	mRNA export from nucleus	P	2
isotig01730	GO:0045860	positive regulation of protein kinase activity	P	2
isotig01754	GO:0035162	embryonic hemopoiesis	P	2
isotig01755	GO:0006633	fatty acid biosynthetic process	P	2
isotig01755	GO:0002168	instar larval development	P	2
isotig01758	GO:0051272	positive regulation of cellular component movement	P	2
isotig01758	GO:0001553	luteinization	P	2
isotig01758	GO:0001889	liver development	P	2
isotig01758	GO:0065008	regulation of biological quality	P	2
isotig01758	GO:0048661	positive regulation of smooth muscle cell proliferation	P	2
isotig01776	GO:0006465	signal peptide processing	P	2
isotig01785	GO:0007010	cytoskeleton organization	P	2
isotig01785	GO:0006928	cellular component movement	P	2
isotig01785	GO:0048754	branching morphogenesis of a tube	P	2
isotig01813	GO:0006626	protein targeting to mitochondrion	P	2
isotig01816	GO:0006814	sodium ion transport	P	2
isotig01823	GO:0008589	regulation of smoothened signaling pathway	P	2
isotig01833	GO:0006260	DNA replication	P	2
isotig01833	GO:0045927	positive regulation of growth	P	2
isotig01835	GO:0006890	retrograde vesicle-mediated transport, Golgi to ER	P	2
isotig01843	GO:0015771	trehalose transport	P	2
isotig01852	GO:0016485	protein processing	P	2
isotig01852	GO:0040014	regulation of multicellular organism growth	P	2
isotig01875	GO:0042127	regulation of cell proliferation	P	2
isotig01875	GO:0007050	cell cycle arrest	P	2
isotig01906	GO:0003012	muscle system process	P	2
isotig01908	GO:0051716	cellular response to stimulus	P	2
isotig01910	GO:0006105	succinate metabolic process	P	2
isotig01919	GO:0006465	signal peptide processing	P	2
isotig01921	GO:0032968	positive regulation of transcription elongation from RNA polymerase II promoter	P	2
isotig01926	GO:0045176	apical protein localization	P	2
isotig01939	GO:0042147	retrograde transport, endosome to Golgi	P	2
isotig01946	GO:0007059	chromosome segregation	P	2
isotig01967	GO:0006662	glycerol ether metabolic process	P	2
isotig01977	GO:0044262	cellular carbohydrate metabolic process	P	2
isotig01979	GO:0008063	Toll signaling pathway	P	2
isotig01988	GO:0007569	cell aging	P	2
isotig01988	GO:0014912	negative regulation of smooth muscle cell migration	P	2
isotig01988	GO:0007050	cell cycle arrest	P	2
isotig01988	GO:0018105	peptidyl-serine phosphorylation	P	2
isotig01988	GO:0045197	establishment or maintenance of epithelial cell apical/basal polarity	P	2
isotig01988	GO:0043206	fibril organization	P	2
isotig01988	GO:0051897	positive regulation of protein kinase B signaling cascade	P	2
isotig01988	GO:0051291	protein heterooligomerization	P	2
isotig01995	GO:0008219	cell death	P	2
isotig02003	GO:0043065	positive regulation of apoptotic process	P	2
isotig02037	GO:0051101	regulation of DNA binding	P	2
isotig02055	GO:0051490	negative regulation of filopodium assembly	P	2
isotig02055	GO:0007294	germarium-derived oocyte fate determination	P	2
isotig02055	GO:0051016	barbed-end actin filament capping	P	2
isotig02068	GO:0046487	glyoxylate metabolic process	P	2
isotig02092	GO:0009052	pentose-phosphate shunt, non-oxidative branch	P	2
isotig02093	GO:0015693	magnesium ion transport	P	2
isotig02097	GO:0030307	positive regulation of cell growth	P	2
isotig02109	GO:0032981	mitochondrial respiratory chain complex I assembly	P	2
isotig02114	GO:0006406	mRNA export from nucleus	P	2
isotig02114	GO:0007173	epidermal growth factor receptor signaling pathway	P	2
isotig02115	GO:0051384	response to glucocorticoid stimulus	P	2
isotig02123	GO:0010038	response to metal ion	P	2
isotig02135	GO:0031667	response to nutrient levels	P	2
isotig02136	GO:0030968	endoplasmic reticulum unfolded protein response	P	2
isotig02136	GO:0030970	retrograde protein transport, ER to cytosol	P	2
isotig02136	GO:0030307	positive regulation of cell growth	P	2
isotig02152	GO:0009416	response to light stimulus	P	2
isotig02152	GO:0035214	eye-antennal disc development	P	2
isotig02152	GO:0002121	inter-male aggressive behavior	P	2
isotig02152	GO:0007424	open tracheal system development	P	2
isotig02203	GO:0070979	protein K11-linked ubiquitination	P	2
isotig02221	GO:0043981	histone H4-K5 acetylation	P	2
isotig02221	GO:0043982	histone H4-K8 acetylation	P	2
isotig02221	GO:0043984	histone H4-K16 acetylation	P	2
isotig02222	GO:0030178	negative regulation of Wnt receptor signaling pathway	P	2
isotig02222	GO:0014912	negative regulation of smooth muscle cell migration	P	2
isotig02235	GO:0072583	clathrin-mediated endocytosis	P	2
isotig02241	GO:0006378	mRNA polyadenylation	P	2
isotig02242	GO:0006029	proteoglycan metabolic process	P	2
isotig02242	GO:0006024	glycosaminoglycan biosynthetic process	P	2
isotig02242	GO:0043206	fibril organization	P	2
isotig02263	GO:0007286	spermatid development	P	2
isotig02308	GO:0006914	autophagy	P	2
isotig02309	GO:0045329	carnitine biosynthetic process	P	2
isotig02326	GO:0007411	axon guidance	P	2
isotig02338	GO:0043687	post-translational protein modification	P	2
isotig02338	GO:0006048	UDP-N-acetylglucosamine biosynthetic process	P	2
isotig02340	GO:0007029	endoplasmic reticulum organization	P	2
isotig02340	GO:0016320	endoplasmic reticulum membrane fusion	P	2
isotig02341	GO:0006662	glycerol ether metabolic process	P	2
isotig02362	GO:0007565	female pregnancy	P	2
isotig02363	GO:0001933	negative regulation of protein phosphorylation	P	2
isotig02363	GO:0045595	regulation of cell differentiation	P	2
isotig02363	GO:0042306	regulation of protein import into nucleus	P	2
isotig02374	GO:0006048	UDP-N-acetylglucosamine biosynthetic process	P	2
isotig02377	GO:0006591	ornithine metabolic process	P	2
isotig02391	GO:0045187	regulation of circadian sleep/wake cycle, sleep	P	2
isotig02415	GO:0034381	plasma lipoprotein particle clearance	P	2
isotig02425	GO:0051101	regulation of DNA binding	P	2
isotig02425	GO:0000082	G1/S transition of mitotic cell cycle	P	2
isotig02440	GO:0006275	regulation of DNA replication	P	2
isotig02463	GO:0044249	cellular biosynthetic process	P	2
isotig02466	GO:0006779	porphyrin-containing compound biosynthetic process	P	2
isotig02467	GO:0000060	protein import into nucleus, translocation	P	2
isotig02467	GO:0030970	retrograde protein transport, ER to cytosol	P	2
isotig02472	GO:0019221	cytokine-mediated signaling pathway	P	2
isotig02506	GO:0006101	citrate metabolic process	P	2
isotig02515	GO:0051272	positive regulation of cellular component movement	P	2
isotig02515	GO:0006101	citrate metabolic process	P	2
isotig02515	GO:0001553	luteinization	P	2
isotig02515	GO:0006573	valine metabolic process	P	2
isotig02515	GO:0001889	liver development	P	2
isotig02515	GO:0019221	cytokine-mediated signaling pathway	P	2
isotig02515	GO:0019915	lipid storage	P	2
isotig02515	GO:0030155	regulation of cell adhesion	P	2
isotig02515	GO:0019218	regulation of steroid metabolic process	P	2
isotig02515	GO:0006105	succinate metabolic process	P	2
isotig02515	GO:0007565	female pregnancy	P	2
isotig02515	GO:0048661	positive regulation of smooth muscle cell proliferation	P	2
isotig02522	GO:0006814	sodium ion transport	P	2
isotig02526	GO:0045039	protein import into mitochondrial inner membrane	P	2
isotig02551	GO:0007173	epidermal growth factor receptor signaling pathway	P	2
isotig02553	GO:0006471	protein ADP-ribosylation	P	2
isotig02569	GO:0007435	salivary gland morphogenesis	P	2
isotig02569	GO:0006342	chromatin silencing	P	2
isotig02576	GO:0009416	response to light stimulus	P	2
isotig02576	GO:0035214	eye-antennal disc development	P	2
isotig02576	GO:0002121	inter-male aggressive behavior	P	2
isotig02576	GO:0007424	open tracheal system development	P	2
isotig02586	GO:0006032	chitin catabolic process	P	2
isotig02588	GO:0006378	mRNA polyadenylation	P	2
isotig02625	GO:0072583	clathrin-mediated endocytosis	P	2
isotig02632	GO:0016568	chromatin modification	P	2
isotig02641	GO:0030178	negative regulation of Wnt receptor signaling pathway	P	2
isotig02641	GO:0019915	lipid storage	P	2
isotig02679	GO:0031065	positive regulation of histone deacetylation	P	2
isotig02679	GO:0007500	mesodermal cell fate determination	P	2
isotig02679	GO:0007443	Malpighian tubule morphogenesis	P	2
isotig02679	GO:0007501	mesodermal cell fate specification	P	2
isotig02679	GO:0007375	anterior midgut invagination	P	2
isotig02679	GO:0007163	establishment or maintenance of cell polarity	P	2
isotig02679	GO:0030034	microvillar actin bundle assembly	P	2
isotig02679	GO:0007499	ectoderm and mesoderm interaction	P	2
isotig02679	GO:0007450	dorsal/ventral pattern formation, imaginal disc	P	2
isotig02679	GO:0035017	cuticle pattern formation	P	2
isotig02679	GO:0008407	chaeta morphogenesis	P	2
isotig02679	GO:0048800	antennal morphogenesis	P	2
isotig02705	GO:0007265	Ras protein signal transduction	P	2
isotig02710	GO:0032786	positive regulation of DNA-dependent transcription, elongation	P	2
isotig02714	GO:0045329	carnitine biosynthetic process	P	2
isotig02740	GO:0045039	protein import into mitochondrial inner membrane	P	2
isotig02758	GO:0035002	liquid clearance, open tracheal system	P	2
isotig02758	GO:0046667	compound eye retinal cell programmed cell death	P	2
isotig02758	GO:0045747	positive regulation of Notch signaling pathway	P	2
isotig02774	GO:0035195	gene silencing by miRNA	P	2
isotig02782	GO:0006729	tetrahydrobiopterin biosynthetic process	P	2
isotig02783	GO:0006024	glycosaminoglycan biosynthetic process	P	2
isotig02802	GO:0007584	response to nutrient	P	2
isotig02802	GO:0007507	heart development	P	2
isotig02805	GO:0008340	determination of adult lifespan	P	2
isotig02805	GO:0007265	Ras protein signal transduction	P	2
isotig02805	GO:0045927	positive regulation of growth	P	2
isotig02805	GO:0007294	germarium-derived oocyte fate determination	P	2
isotig02866	GO:0006921	cellular component disassembly involved in apoptotic process	P	2
isotig02891	GO:0007010	cytoskeleton organization	P	2
isotig02907	GO:0017055	negative regulation of RNA polymerase II transcriptional preinitiation complex assembly	P	2
isotig02920	GO:0006928	cellular component movement	P	2
isotig02927	GO:0008354	germ cell migration	P	2
isotig02927	GO:0007076	mitotic chromosome condensation	P	2
isotig02927	GO:0006338	chromatin remodeling	P	2
isotig02939	GO:0010628	positive regulation of gene expression	P	2
isotig02939	GO:0043984	histone H4-K16 acetylation	P	2
isotig02939	GO:0043982	histone H4-K8 acetylation	P	2
isotig02939	GO:0043981	histone H4-K5 acetylation	P	2
isotig02944	GO:0008293	torso signaling pathway	P	2
isotig02945	GO:0051276	chromosome organization	P	2
isotig02945	GO:0006275	regulation of DNA replication	P	2
isotig02973	GO:0032236	positive regulation of calcium ion transport via store-operated calcium channel activity	P	2
isotig02973	GO:0002115	store-operated calcium entry	P	2
isotig02988	GO:0043388	positive regulation of DNA binding	P	2
isotig03012	GO:0006464	cellular protein modification process	P	2
isotig03047	GO:0006144	purine nucleobase metabolic process	P	2
isotig03062	GO:0008589	regulation of smoothened signaling pathway	P	2
isotig03062	GO:0031647	regulation of protein stability	P	2
isotig03087	GO:0032968	positive regulation of transcription elongation from RNA polymerase II promoter	P	2
isotig03121	GO:0033344	cholesterol efflux	P	2
isotig03145	GO:0051592	response to calcium ion	P	2
isotig03168	GO:0000060	protein import into nucleus, translocation	P	2
isotig03174	GO:0006730	one-carbon metabolic process	P	2
isotig03192	GO:0006917	induction of apoptosis	P	2
isotig03192	GO:0072593	reactive oxygen species metabolic process	P	2
isotig03198	GO:0006954	inflammatory response	P	2
isotig03198	GO:0043170	macromolecule metabolic process	P	2
isotig03198	GO:0065009	regulation of molecular function	P	2
isotig03198	GO:0034599	cellular response to oxidative stress	P	2
isotig03303	GO:0006139	nucleobase-containing compound metabolic process	P	2
isotig03347	GO:0016049	cell growth	P	2
isotig03380	GO:0007519	skeletal muscle tissue development	P	2
isotig03399	GO:0006779	porphyrin-containing compound biosynthetic process	P	2
isotig03411	GO:0045333	cellular respiration	P	2
isotig03411	GO:0072593	reactive oxygen species metabolic process	P	2
isotig03411	GO:0051881	regulation of mitochondrial membrane potential	P	2
isotig03418	GO:0006091	generation of precursor metabolites and energy	P	2
isotig03426	GO:0032236	positive regulation of calcium ion transport via store-operated calcium channel activity	P	2
isotig03426	GO:0002115	store-operated calcium entry	P	2
isotig03427	GO:0016568	chromatin modification	P	2
isotig03433	GO:0007423	sensory organ development	P	2
isotig03444	GO:0015771	trehalose transport	P	2
isotig03445	GO:0007411	axon guidance	P	2
isotig03454	GO:0006032	chitin catabolic process	P	2
isotig03457	GO:0035002	liquid clearance, open tracheal system	P	2
isotig03457	GO:0046667	compound eye retinal cell programmed cell death	P	2
isotig03457	GO:0045747	positive regulation of Notch signaling pathway	P	2
isotig03481	GO:0022414	reproductive process	P	2
isotig03517	GO:0072347	response to anesthetic	P	2
isotig03517	GO:0007629	flight behavior	P	2
isotig03517	GO:0007625	grooming behavior	P	2
isotig03517	GO:0008594	photoreceptor cell morphogenesis	P	2
isotig03517	GO:0007412	axon target recognition	P	2
isotig03517	GO:0007630	jump response	P	2
isotig03534	GO:0008049	male courtship behavior	P	2
isotig03564	GO:0043065	positive regulation of apoptotic process	P	2
isotig03582	GO:0006967	positive regulation of antifungal peptide biosynthetic process	P	2
isotig03585	GO:0051291	protein heterooligomerization	P	2
isotig03588	GO:0006967	positive regulation of antifungal peptide biosynthetic process	P	2
isotig03617	GO:0034381	plasma lipoprotein particle clearance	P	2
isotig03645	GO:0006119	oxidative phosphorylation	P	2
isotig03650	GO:0006471	protein ADP-ribosylation	P	2
isotig03653	GO:0006396	RNA processing	P	2
isotig03654	GO:0006573	valine metabolic process	P	2
isotig03671	GO:0006536	glutamate metabolic process	P	2
isotig03671	GO:0006531	aspartate metabolic process	P	2
isotig03704	GO:0045333	cellular respiration	P	2
isotig03718	GO:0032981	mitochondrial respiratory chain complex I assembly	P	2
isotig03721	GO:0006887	exocytosis	P	2
isotig03724	GO:0006536	glutamate metabolic process	P	2
isotig03724	GO:0006531	aspartate metabolic process	P	2
isotig03732	GO:0042306	regulation of protein import into nucleus	P	2
isotig03744	GO:0010628	positive regulation of gene expression	P	2
isotig03744	GO:0043526	neuroprotection	P	2
isotig03744	GO:0001933	negative regulation of protein phosphorylation	P	2
isotig03848	GO:0006368	transcription elongation from RNA polymerase II promoter	P	2
isotig03852	GO:0001700	embryonic development via the syncytial blastoderm	P	2
isotig03852	GO:0002168	instar larval development	P	2
isotig03863	GO:0006029	proteoglycan metabolic process	P	2
isotig03911	GO:0007423	sensory organ development	P	2
isotig03927	GO:0006559	L-phenylalanine catabolic process	P	2
isotig03968	GO:0000082	G1/S transition of mitotic cell cycle	P	2
isotig03968	GO:0016049	cell growth	P	2
isotig03968	GO:0071456	cellular response to hypoxia	P	2
isotig03968	GO:0005979	regulation of glycogen biosynthetic process	P	2
isotig03968	GO:0043200	response to amino acid stimulus	P	2
isotig03968	GO:0018105	peptidyl-serine phosphorylation	P	2
isotig03968	GO:0051897	positive regulation of protein kinase B signaling cascade	P	2
isotig03968	GO:0046889	positive regulation of lipid biosynthetic process	P	2
isotig04007	GO:0006139	nucleobase-containing compound metabolic process	P	2
isotig04029	GO:0006464	cellular protein modification process	P	2
isotig04029	GO:0006730	one-carbon metabolic process	P	2
isotig04029	GO:0005977	glycogen metabolic process	P	2
isotig04042	GO:0007076	mitotic chromosome condensation	P	2
isotig04042	GO:0051592	response to calcium ion	P	2
isotig04042	GO:0030241	skeletal muscle myosin thick filament assembly	P	2
isotig04053	GO:0032502	developmental process	P	2
isotig04074	GO:0006626	protein targeting to mitochondrion	P	2
isotig04117	GO:0022416	chaeta development	P	2
isotig04122	GO:0042147	retrograde transport, endosome to Golgi	P	2
isotig04123	GO:0043052	thermotaxis	P	2
isotig04124	GO:0006892	post-Golgi vesicle-mediated transport	P	2
isotig04134	GO:0033344	cholesterol efflux	P	2
isotig04134	GO:0048519	negative regulation of biological process	P	2
isotig04134	GO:0019218	regulation of steroid metabolic process	P	2
isotig04150	GO:0048519	negative regulation of biological process	P	2
isotig04164	GO:0071456	cellular response to hypoxia	P	2
isotig04170	GO:0007243	intracellular protein kinase cascade	P	2
isotig04170	GO:0043687	post-translational protein modification	P	2
isotig04192	GO:0006396	RNA processing	P	2
isotig04283	GO:0001700	embryonic development via the syncytial blastoderm	P	2
isotig04283	GO:0035195	gene silencing by miRNA	P	2
isotig04292	GO:0046487	glyoxylate metabolic process	P	2
isotig04306	GO:0006342	chromatin silencing	P	2
isotig04314	GO:0007243	intracellular protein kinase cascade	P	2
isotig04386	GO:0006069	ethanol oxidation	P	2
isotig04419	GO:0032786	positive regulation of DNA-dependent transcription, elongation	P	2
isotig04419	GO:0006368	transcription elongation from RNA polymerase II promoter	P	2
isotig04446	GO:0042067	establishment of ommatidial planar polarity	P	2
isotig04446	GO:0016319	mushroom body development	P	2
isotig04446	GO:0036011	imaginal disc-derived leg segmentation	P	2
isotig04446	GO:0030041	actin filament polymerization	P	2
isotig04446	GO:0000915	cytokinesis, actomyosin contractile ring assembly	P	2
isotig04446	GO:0030042	actin filament depolymerization	P	2
isotig00086	GO:0016183	synaptic vesicle coating	P	3
isotig00142	GO:0042811	pheromone biosynthetic process	P	3
isotig00210	GO:0006952	defense response	P	3
isotig00296	GO:0048731	system development	P	3
isotig00308	GO:0007370	ventral furrow formation	P	3
isotig00308	GO:0001737	establishment of imaginal disc-derived wing hair orientation	P	3
isotig00308	GO:0035099	hemocyte migration	P	3
isotig00314	GO:0050790	regulation of catalytic activity	P	3
isotig00314	GO:0007154	cell communication	P	3
isotig00314	GO:0048731	system development	P	3
isotig00370	GO:0008610	lipid biosynthetic process	P	3
isotig00386	GO:0007568	aging	P	3
isotig00412	GO:0016226	iron-sulfur cluster assembly	P	3
isotig00424	GO:0009253	peptidoglycan catabolic process	P	3
isotig00544	GO:0009615	response to virus	P	3
isotig00552	GO:0016246	RNA interference	P	3
isotig00560	GO:0006259	DNA metabolic process	P	3
isotig00564	GO:0006513	protein monoubiquitination	P	3
isotig00564	GO:0070936	protein K48-linked ubiquitination	P	3
isotig00616	GO:0007568	aging	P	3
isotig00726	GO:0033227	dsRNA transport	P	3
isotig00738	GO:0042811	pheromone biosynthetic process	P	3
isotig00738	GO:0008610	lipid biosynthetic process	P	3
isotig00776	GO:0007409	axonogenesis	P	3
isotig00788	GO:0048663	neuron fate commitment	P	3
isotig00801	GO:0006102	isocitrate metabolic process	P	3
isotig00802	GO:0009060	aerobic respiration	P	3
isotig00803	GO:0016043	cellular component organization	P	3
isotig00834	GO:0008585	female gonad development	P	3
isotig00834	GO:0014070	response to organic cyclic compound	P	3
isotig00834	GO:0006102	isocitrate metabolic process	P	3
isotig00878	GO:0006754	ATP biosynthetic process	P	3
isotig00878	GO:0006816	calcium ion transport	P	3
isotig00882	GO:0014070	response to organic cyclic compound	P	3
isotig00882	GO:0051289	protein homotetramerization	P	3
isotig00937	GO:0000413	protein peptidyl-prolyl isomerization	P	3
isotig00975	GO:0006470	protein dephosphorylation	P	3
isotig00982	GO:0034220	ion transmembrane transport	P	3
isotig00984	GO:0051131	chaperone-mediated protein complex assembly	P	3
isotig01009	GO:0033036	macromolecule localization	P	3
isotig01045	GO:0009615	response to virus	P	3
isotig01087	GO:0010875	positive regulation of cholesterol efflux	P	3
isotig01087	GO:0032367	intracellular cholesterol transport	P	3
isotig01087	GO:0033993	response to lipid	P	3
isotig01095	GO:0070936	protein K48-linked ubiquitination	P	3
isotig01149	GO:0042811	pheromone biosynthetic process	P	3
isotig01174	GO:0032956	regulation of actin cytoskeleton organization	P	3
isotig01174	GO:0035317	imaginal disc-derived wing hair organization	P	3
isotig01203	GO:0007317	regulation of pole plasm oskar mRNA localization	P	3
isotig01217	GO:0000209	protein polyubiquitination	P	3
isotig01217	GO:0051437	positive regulation of ubiquitin-protein ligase activity involved in mitotic cell cycle	P	3
isotig01217	GO:0042981	regulation of apoptotic process	P	3
isotig01217	GO:0031145	anaphase-promoting complex-dependent proteasomal ubiquitin-dependent protein catabolic process	P	3
isotig01245	GO:0007370	ventral furrow formation	P	3
isotig01245	GO:0048749	compound eye development	P	3
isotig01245	GO:0035317	imaginal disc-derived wing hair organization	P	3
isotig01245	GO:0035099	hemocyte migration	P	3
isotig01249	GO:0000209	protein polyubiquitination	P	3
isotig01249	GO:0051437	positive regulation of ubiquitin-protein ligase activity involved in mitotic cell cycle	P	3
isotig01249	GO:0042981	regulation of apoptotic process	P	3
isotig01249	GO:0031145	anaphase-promoting complex-dependent proteasomal ubiquitin-dependent protein catabolic process	P	3
isotig01254	GO:0007568	aging	P	3
isotig01278	GO:0007409	axonogenesis	P	3
isotig01278	GO:0008585	female gonad development	P	3
isotig01278	GO:0001737	establishment of imaginal disc-derived wing hair orientation	P	3
isotig01290	GO:0006513	protein monoubiquitination	P	3
isotig01290	GO:0008333	endosome to lysosome transport	P	3
isotig01333	GO:0006816	calcium ion transport	P	3
isotig01339	GO:0010875	positive regulation of cholesterol efflux	P	3
isotig01339	GO:0032367	intracellular cholesterol transport	P	3
isotig01339	GO:0033993	response to lipid	P	3
isotig01392	GO:0009615	response to virus	P	3
isotig01392	GO:0010033	response to organic substance	P	3
isotig01416	GO:0030301	cholesterol transport	P	3
isotig01424	GO:0043161	proteasomal ubiquitin-dependent protein catabolic process	P	3
isotig01424	GO:0006513	protein monoubiquitination	P	3
isotig01450	GO:0048518	positive regulation of biological process	P	3
isotig01463	GO:0042744	hydrogen peroxide catabolic process	P	3
isotig01527	GO:0045727	positive regulation of translation	P	3
isotig01527	GO:0051028	mRNA transport	P	3
isotig01528	GO:0007291	sperm individualization	P	3
isotig01528	GO:0048749	compound eye development	P	3
isotig01529	GO:0045475	locomotor rhythm	P	3
isotig01552	GO:0016044	cellular membrane organization	P	3
isotig01567	GO:0033036	macromolecule localization	P	3
isotig01585	GO:0008203	cholesterol metabolic process	P	3
isotig01590	GO:0010941	regulation of cell death	P	3
isotig01600	GO:0008610	lipid biosynthetic process	P	3
isotig01626	GO:0042744	hydrogen peroxide catabolic process	P	3
isotig01671	GO:0007095	mitotic cell cycle G2/M transition DNA damage checkpoint	P	3
isotig01698	GO:0008202	steroid metabolic process	P	3
isotig01702	GO:0051591	response to cAMP	P	3
isotig01734	GO:0006952	defense response	P	3
isotig01754	GO:0001666	response to hypoxia	P	3
isotig01755	GO:0051726	regulation of cell cycle	P	3
isotig01758	GO:0045471	response to ethanol	P	3
isotig01758	GO:0006953	acute-phase response	P	3
isotig01758	GO:0001666	response to hypoxia	P	3
isotig01758	GO:0042981	regulation of apoptotic process	P	3
isotig01764	GO:0009253	peptidoglycan catabolic process	P	3
isotig01781	GO:0007095	mitotic cell cycle G2/M transition DNA damage checkpoint	P	3
isotig01785	GO:0007229	integrin-mediated signaling pathway	P	3
isotig01791	GO:0045116	protein neddylation	P	3
isotig01799	GO:0042176	regulation of protein catabolic process	P	3
isotig01799	GO:0050790	regulation of catalytic activity	P	3
isotig01800	GO:0014070	response to organic cyclic compound	P	3
isotig01830	GO:0016070	RNA metabolic process	P	3
isotig01830	GO:0048663	neuron fate commitment	P	3
isotig01831	GO:0045727	positive regulation of translation	P	3
isotig01831	GO:0051028	mRNA transport	P	3
isotig01875	GO:0010941	regulation of cell death	P	3
isotig01908	GO:0010033	response to organic substance	P	3
isotig01908	GO:0016043	cellular component organization	P	3
isotig01928	GO:0019222	regulation of metabolic process	P	3
isotig01979	GO:0006952	defense response	P	3
isotig01981	GO:0006754	ATP biosynthetic process	P	3
isotig01981	GO:0006816	calcium ion transport	P	3
isotig01988	GO:0032956	regulation of actin cytoskeleton organization	P	3
isotig01988	GO:0007229	integrin-mediated signaling pathway	P	3
isotig01989	GO:0033036	macromolecule localization	P	3
isotig02025	GO:0010430	fatty acid omega-oxidation	P	3
isotig02047	GO:0006754	ATP biosynthetic process	P	3
isotig02047	GO:0034220	ion transmembrane transport	P	3
isotig02093	GO:0034220	ion transmembrane transport	P	3
isotig02113	GO:0030198	extracellular matrix organization	P	3
isotig02114	GO:0007317	regulation of pole plasm oskar mRNA localization	P	3
isotig02115	GO:0051591	response to cAMP	P	3
isotig02124	GO:0016043	cellular component organization	P	3
isotig02152	GO:0045475	locomotor rhythm	P	3
isotig02152	GO:0000289	nuclear-transcribed mRNA poly(A) tail shortening	P	3
isotig02156	GO:0010430	fatty acid omega-oxidation	P	3
isotig02186	GO:0051726	regulation of cell cycle	P	3
isotig02222	GO:0008203	cholesterol metabolic process	P	3
isotig02222	GO:0010875	positive regulation of cholesterol efflux	P	3
isotig02222	GO:0032956	regulation of actin cytoskeleton organization	P	3
isotig02235	GO:0048488	synaptic vesicle endocytosis	P	3
isotig02247	GO:0007224	smoothened signaling pathway	P	3
isotig02263	GO:0006122	mitochondrial electron transport, ubiquinol to cytochrome c	P	3
isotig02337	GO:0051131	chaperone-mediated protein complex assembly	P	3
isotig02340	GO:0007317	regulation of pole plasm oskar mRNA localization	P	3
isotig02376	GO:0006259	DNA metabolic process	P	3
isotig02415	GO:0048518	positive regulation of biological process	P	3
isotig02415	GO:0030301	cholesterol transport	P	3
isotig02415	GO:0019222	regulation of metabolic process	P	3
isotig02447	GO:0007154	cell communication	P	3
isotig02472	GO:0042744	hydrogen peroxide catabolic process	P	3
isotig02472	GO:0051591	response to cAMP	P	3
isotig02515	GO:0045471	response to ethanol	P	3
isotig02515	GO:0006953	acute-phase response	P	3
isotig02515	GO:0001666	response to hypoxia	P	3
isotig02523	GO:0007596	blood coagulation	P	3
isotig02544	GO:0051028	mRNA transport	P	3
isotig02571	GO:0016070	RNA metabolic process	P	3
isotig02571	GO:0048663	neuron fate commitment	P	3
isotig02576	GO:0045475	locomotor rhythm	P	3
isotig02576	GO:0000289	nuclear-transcribed mRNA poly(A) tail shortening	P	3
isotig02641	GO:0007224	smoothened signaling pathway	P	3
isotig02679	GO:0007370	ventral furrow formation	P	3
isotig02679	GO:0048749	compound eye development	P	3
isotig02679	GO:0035317	imaginal disc-derived wing hair organization	P	3
isotig02679	GO:0035099	hemocyte migration	P	3
isotig02712	GO:0006470	protein dephosphorylation	P	3
isotig02723	GO:0042176	regulation of protein catabolic process	P	3
isotig02758	GO:0030198	extracellular matrix organization	P	3
isotig02758	GO:0033227	dsRNA transport	P	3
isotig02758	GO:0016183	synaptic vesicle coating	P	3
isotig02758	GO:0007291	sperm individualization	P	3
isotig02758	GO:0045807	positive regulation of endocytosis	P	3
isotig02760	GO:0000413	protein peptidyl-prolyl isomerization	P	3
isotig02774	GO:0016246	RNA interference	P	3
isotig02774	GO:0000289	nuclear-transcribed mRNA poly(A) tail shortening	P	3
isotig02783	GO:0007224	smoothened signaling pathway	P	3
isotig02802	GO:0045471	response to ethanol	P	3
isotig02805	GO:0007095	mitotic cell cycle G2/M transition DNA damage checkpoint	P	3
isotig02825	GO:0006102	isocitrate metabolic process	P	3
isotig02882	GO:0045807	positive regulation of endocytosis	P	3
isotig02899	GO:0008202	steroid metabolic process	P	3
isotig02901	GO:0006986	response to unfolded protein	P	3
isotig02903	GO:0042176	regulation of protein catabolic process	P	3
isotig02903	GO:0050790	regulation of catalytic activity	P	3
isotig02915	GO:0010430	fatty acid omega-oxidation	P	3
isotig02920	GO:0048731	system development	P	3
isotig02952	GO:0008202	steroid metabolic process	P	3
isotig02973	GO:0051533	positive regulation of NFAT protein import into nucleus	P	3
isotig02993	GO:0008333	endosome to lysosome transport	P	3
isotig03027	GO:0070936	protein K48-linked ubiquitination	P	3
isotig03052	GO:0016246	RNA interference	P	3
isotig03062	GO:0045116	protein neddylation	P	3
isotig03075	GO:0016260	selenocysteine biosynthetic process	P	3
isotig03075	GO:2000378	negative regulation of reactive oxygen species metabolic process	P	3
isotig03088	GO:0043161	proteasomal ubiquitin-dependent protein catabolic process	P	3
isotig03198	GO:0010941	regulation of cell death	P	3
isotig03237	GO:0016260	selenocysteine biosynthetic process	P	3
isotig03237	GO:2000378	negative regulation of reactive oxygen species metabolic process	P	3
isotig03263	GO:0016260	selenocysteine biosynthetic process	P	3
isotig03263	GO:2000378	negative regulation of reactive oxygen species metabolic process	P	3
isotig03334	GO:0006986	response to unfolded protein	P	3
isotig03352	GO:0000209	protein polyubiquitination	P	3
isotig03352	GO:0051437	positive regulation of ubiquitin-protein ligase activity involved in mitotic cell cycle	P	3
isotig03352	GO:0051726	regulation of cell cycle	P	3
isotig03352	GO:0031145	anaphase-promoting complex-dependent proteasomal ubiquitin-dependent protein catabolic process	P	3
isotig03352	GO:0006470	protein dephosphorylation	P	3
isotig03365	GO:0008333	endosome to lysosome transport	P	3
isotig03426	GO:0051533	positive regulation of NFAT protein import into nucleus	P	3
isotig03427	GO:0043161	proteasomal ubiquitin-dependent protein catabolic process	P	3
isotig03428	GO:0016070	RNA metabolic process	P	3
isotig03445	GO:0007229	integrin-mediated signaling pathway	P	3
isotig03445	GO:0007596	blood coagulation	P	3
isotig03455	GO:0006259	DNA metabolic process	P	3
isotig03457	GO:0030198	extracellular matrix organization	P	3
isotig03457	GO:0033227	dsRNA transport	P	3
isotig03457	GO:0016183	synaptic vesicle coating	P	3
isotig03457	GO:0007291	sperm individualization	P	3
isotig03457	GO:0045807	positive regulation of endocytosis	P	3
isotig03546	GO:0009060	aerobic respiration	P	3
isotig03546	GO:0006122	mitochondrial electron transport, ubiquinol to cytochrome c	P	3
isotig03552	GO:0000413	protein peptidyl-prolyl isomerization	P	3
isotig03585	GO:0006122	mitochondrial electron transport, ubiquinol to cytochrome c	P	3
isotig03617	GO:0030301	cholesterol transport	P	3
isotig03645	GO:0009060	aerobic respiration	P	3
isotig03693	GO:0006953	acute-phase response	P	3
isotig03694	GO:0006986	response to unfolded protein	P	3
isotig03744	GO:0051131	chaperone-mediated protein complex assembly	P	3
isotig03784	GO:0016226	iron-sulfur cluster assembly	P	3
isotig03820	GO:0009253	peptidoglycan catabolic process	P	3
isotig03945	GO:0051289	protein homotetramerization	P	3
isotig03968	GO:0045727	positive regulation of translation	P	3
isotig04012	GO:0045116	protein neddylation	P	3
isotig04013	GO:0048488	synaptic vesicle endocytosis	P	3
isotig04029	GO:0051289	protein homotetramerization	P	3
isotig04042	GO:0007596	blood coagulation	P	3
isotig04083	GO:0016226	iron-sulfur cluster assembly	P	3
isotig04117	GO:0051533	positive regulation of NFAT protein import into nucleus	P	3
isotig04122	GO:0007154	cell communication	P	3
isotig04124	GO:0016044	cellular membrane organization	P	3
isotig04134	GO:0048518	positive regulation of biological process	P	3
isotig04134	GO:0010033	response to organic substance	P	3
isotig04134	GO:0008203	cholesterol metabolic process	P	3
isotig04150	GO:0019222	regulation of metabolic process	P	3
isotig04161	GO:0048488	synaptic vesicle endocytosis	P	3
isotig04268	GO:0033993	response to lipid	P	3
isotig04268	GO:0032367	intracellular cholesterol transport	P	3
isotig04268	GO:0016044	cellular membrane organization	P	3
isotig04446	GO:0007409	axonogenesis	P	3
isotig04446	GO:0008585	female gonad development	P	3
isotig04446	GO:0001737	establishment of imaginal disc-derived wing hair orientation	P	3
isotig00086	GO:0007269	neurotransmitter secretion	P	4
isotig00135	GO:0019730	antimicrobial humoral response	P	4
isotig00140	GO:0019730	antimicrobial humoral response	P	4
isotig00296	GO:0009653	anatomical structure morphogenesis	P	4
isotig00296	GO:0071842	cellular component organization at cellular level	P	4
isotig00308	GO:0048813	dendrite morphogenesis	P	4
isotig00308	GO:0030239	myofibril assembly	P	4
isotig00308	GO:0007420	brain development	P	4
isotig00308	GO:0007349	cellularization	P	4
isotig00308	GO:0042060	wound healing	P	4
isotig00308	GO:0035159	regulation of tube length, open tracheal system	P	4
isotig00308	GO:0007422	peripheral nervous system development	P	4
isotig00314	GO:0071842	cellular component organization at cellular level	P	4
isotig00322	GO:0045214	sarcomere organization	P	4
isotig00356	GO:0019538	protein metabolic process	P	4
isotig00386	GO:0042594	response to starvation	P	4
isotig00430	GO:0040008	regulation of growth	P	4
isotig00444	GO:0006497	protein lipidation	P	4
isotig00444	GO:0010998	regulation of translational initiation by eIF2 alpha phosphorylation	P	4
isotig00444	GO:0010506	regulation of autophagy	P	4
isotig00504	GO:0050821	protein stabilization	P	4
isotig00510	GO:0007283	spermatogenesis	P	4
isotig00552	GO:0019730	antimicrobial humoral response	P	4
isotig00664	GO:0045214	sarcomere organization	P	4
isotig00709	GO:0030239	myofibril assembly	P	4
isotig00721	GO:0008360	regulation of cell shape	P	4
isotig00721	GO:0007283	spermatogenesis	P	4
isotig00721	GO:0007015	actin filament organization	P	4
isotig00726	GO:0007476	imaginal disc-derived wing morphogenesis	P	4
isotig00788	GO:0007616	long-term memory	P	4
isotig00788	GO:0016199	axon midline choice point recognition	P	4
isotig00789	GO:0007476	imaginal disc-derived wing morphogenesis	P	4
isotig00908	GO:0048513	organ development	P	4
isotig00914	GO:0001701	in utero embryonic development	P	4
isotig00935	GO:0001701	in utero embryonic development	P	4
isotig00940	GO:0048856	anatomical structure development	P	4
isotig00944	GO:0006955	immune response	P	4
isotig01000	GO:0008360	regulation of cell shape	P	4
isotig01009	GO:0042221	response to chemical stimulus	P	4
isotig01009	GO:0032879	regulation of localization	P	4
isotig01009	GO:0071842	cellular component organization at cellular level	P	4
isotig01009	GO:0048856	anatomical structure development	P	4
isotig01034	GO:0042221	response to chemical stimulus	P	4
isotig01035	GO:0022904	respiratory electron transport chain	P	4
isotig01071	GO:0006783	heme biosynthetic process	P	4
isotig01071	GO:0051260	protein homooligomerization	P	4
isotig01098	GO:0008360	regulation of cell shape	P	4
isotig01098	GO:0007015	actin filament organization	P	4
isotig01140	GO:0051603	proteolysis involved in cellular protein catabolic process	P	4
isotig01154	GO:0022904	respiratory electron transport chain	P	4
isotig01168	GO:0007166	cell surface receptor signaling pathway	P	4
isotig01168	GO:0001701	in utero embryonic development	P	4
isotig01172	GO:0006334	nucleosome assembly	P	4
isotig01174	GO:0035159	regulation of tube length, open tracheal system	P	4
isotig01174	GO:0007349	cellularization	P	4
isotig01174	GO:0042060	wound healing	P	4
isotig01181	GO:0006811	ion transport	P	4
isotig01197	GO:0000902	cell morphogenesis	P	4
isotig01197	GO:0010591	regulation of lamellipodium assembly	P	4
isotig01203	GO:0008103	oocyte microtubule cytoskeleton polarization	P	4
isotig01203	GO:0042052	rhabdomere development	P	4
isotig01203	GO:0007030	Golgi organization	P	4
isotig01217	GO:0016032	viral reproduction	P	4
isotig01231	GO:0030239	myofibril assembly	P	4
isotig01242	GO:0045859	regulation of protein kinase activity	P	4
isotig01245	GO:0048813	dendrite morphogenesis	P	4
isotig01245	GO:0055059	asymmetric neuroblast division	P	4
isotig01245	GO:0042060	wound healing	P	4
isotig01249	GO:0016032	viral reproduction	P	4
isotig01249	GO:0044419	interspecies interaction between organisms	P	4
isotig01254	GO:0042594	response to starvation	P	4
isotig01256	GO:0015986	ATP synthesis coupled proton transport	P	4
isotig01278	GO:0042052	rhabdomere development	P	4
isotig01278	GO:0010591	regulation of lamellipodium assembly	P	4
isotig01322	GO:0050821	protein stabilization	P	4
isotig01432	GO:0019083	viral transcription	P	4
isotig01432	GO:0006415	translational termination	P	4
isotig01455	GO:0048856	anatomical structure development	P	4
isotig01461	GO:0015986	ATP synthesis coupled proton transport	P	4
isotig01471	GO:0006497	protein lipidation	P	4
isotig01471	GO:0010998	regulation of translational initiation by eIF2 alpha phosphorylation	P	4
isotig01471	GO:0010506	regulation of autophagy	P	4
isotig01482	GO:0008652	cellular amino acid biosynthetic process	P	4
isotig01487	GO:0031638	zymogen activation	P	4
isotig01496	GO:0006497	protein lipidation	P	4
isotig01496	GO:0010998	regulation of translational initiation by eIF2 alpha phosphorylation	P	4
isotig01496	GO:0010506	regulation of autophagy	P	4
isotig01500	GO:0022904	respiratory electron transport chain	P	4
isotig01507	GO:0046034	ATP metabolic process	P	4
isotig01524	GO:0007015	actin filament organization	P	4
isotig01524	GO:0008360	regulation of cell shape	P	4
isotig01524	GO:0055059	asymmetric neuroblast division	P	4
isotig01540	GO:0019538	protein metabolic process	P	4
isotig01552	GO:0016032	viral reproduction	P	4
isotig01558	GO:0045214	sarcomere organization	P	4
isotig01567	GO:0032879	regulation of localization	P	4
isotig01567	GO:0006898	receptor-mediated endocytosis	P	4
isotig01597	GO:0007030	Golgi organization	P	4
isotig01621	GO:0007030	Golgi organization	P	4
isotig01626	GO:0032496	response to lipopolysaccharide	P	4
isotig01672	GO:0031638	zymogen activation	P	4
isotig01704	GO:0046034	ATP metabolic process	P	4
isotig01734	GO:0006955	immune response	P	4
isotig01747	GO:0030239	myofibril assembly	P	4
isotig01754	GO:0006783	heme biosynthetic process	P	4
isotig01758	GO:0032496	response to lipopolysaccharide	P	4
isotig01773	GO:0009653	anatomical structure morphogenesis	P	4
isotig01773	GO:0007166	cell surface receptor signaling pathway	P	4
isotig01781	GO:0050821	protein stabilization	P	4
isotig01800	GO:0051603	proteolysis involved in cellular protein catabolic process	P	4
isotig01830	GO:0007616	long-term memory	P	4
isotig01830	GO:0016199	axon midline choice point recognition	P	4
isotig01852	GO:0048856	anatomical structure development	P	4
isotig01908	GO:0009653	anatomical structure morphogenesis	P	4
isotig01908	GO:0007420	brain development	P	4
isotig01926	GO:0007015	actin filament organization	P	4
isotig01926	GO:0055059	asymmetric neuroblast division	P	4
isotig01979	GO:0031638	zymogen activation	P	4
isotig02003	GO:0007349	cellularization	P	4
isotig02031	GO:0008652	cellular amino acid biosynthetic process	P	4
isotig02035	GO:0015986	ATP synthesis coupled proton transport	P	4
isotig02043	GO:0006497	protein lipidation	P	4
isotig02043	GO:0010998	regulation of translational initiation by eIF2 alpha phosphorylation	P	4
isotig02043	GO:0010506	regulation of autophagy	P	4
isotig02050	GO:0006334	nucleosome assembly	P	4
isotig02055	GO:0000902	cell morphogenesis	P	4
isotig02055	GO:0010591	regulation of lamellipodium assembly	P	4
isotig02057	GO:0019538	protein metabolic process	P	4
isotig02094	GO:0018279	protein N-linked glycosylation via asparagine	P	4
isotig02095	GO:0042594	response to starvation	P	4
isotig02099	GO:0006783	heme biosynthetic process	P	4
isotig02114	GO:0008103	oocyte microtubule cytoskeleton polarization	P	4
isotig02153	GO:0019083	viral transcription	P	4
isotig02153	GO:0006415	translational termination	P	4
isotig02173	GO:0009653	anatomical structure morphogenesis	P	4
isotig02173	GO:0048513	organ development	P	4
isotig02176	GO:0006811	ion transport	P	4
isotig02201	GO:0009058	biosynthetic process	P	4
isotig02220	GO:0007283	spermatogenesis	P	4
isotig02222	GO:0006898	receptor-mediated endocytosis	P	4
isotig02231	GO:0019083	viral transcription	P	4
isotig02231	GO:0006415	translational termination	P	4
isotig02331	GO:0018279	protein N-linked glycosylation via asparagine	P	4
isotig02338	GO:0018279	protein N-linked glycosylation via asparagine	P	4
isotig02340	GO:0008103	oocyte microtubule cytoskeleton polarization	P	4
isotig02340	GO:0042052	rhabdomere development	P	4
isotig02340	GO:0007030	Golgi organization	P	4
isotig02350	GO:0051603	proteolysis involved in cellular protein catabolic process	P	4
isotig02363	GO:0007166	cell surface receptor signaling pathway	P	4
isotig02363	GO:0000902	cell morphogenesis	P	4
isotig02363	GO:0048513	organ development	P	4
isotig02374	GO:0006541	glutamine metabolic process	P	4
isotig02415	GO:0032496	response to lipopolysaccharide	P	4
isotig02415	GO:0032879	regulation of localization	P	4
isotig02425	GO:0051260	protein homooligomerization	P	4
isotig02434	GO:0046034	ATP metabolic process	P	4
isotig02515	GO:0032496	response to lipopolysaccharide	P	4
isotig02522	GO:0045859	regulation of protein kinase activity	P	4
isotig02571	GO:0007616	long-term memory	P	4
isotig02571	GO:0016199	axon midline choice point recognition	P	4
isotig02594	GO:0031638	zymogen activation	P	4
isotig02630	GO:0042221	response to chemical stimulus	P	4
isotig02635	GO:0042221	response to chemical stimulus	P	4
isotig02660	GO:0019538	protein metabolic process	P	4
isotig02672	GO:0006955	immune response	P	4
isotig02679	GO:0048813	dendrite morphogenesis	P	4
isotig02679	GO:0055059	asymmetric neuroblast division	P	4
isotig02679	GO:0042060	wound healing	P	4
isotig02749	GO:0040008	regulation of growth	P	4
isotig02758	GO:0035159	regulation of tube length, open tracheal system	P	4
isotig02758	GO:0007269	neurotransmitter secretion	P	4
isotig02758	GO:0040008	regulation of growth	P	4
isotig02802	GO:0042594	response to starvation	P	4
isotig02802	GO:0007420	brain development	P	4
isotig02805	GO:0008103	oocyte microtubule cytoskeleton polarization	P	4
isotig02851	GO:0000902	cell morphogenesis	P	4
isotig02882	GO:0006898	receptor-mediated endocytosis	P	4
isotig02882	GO:0071842	cellular component organization at cellular level	P	4
isotig02888	GO:0007476	imaginal disc-derived wing morphogenesis	P	4
isotig02919	GO:0048513	organ development	P	4
isotig02927	GO:0007420	brain development	P	4
isotig02939	GO:0050821	protein stabilization	P	4
isotig02939	GO:0044419	interspecies interaction between organisms	P	4
isotig02963	GO:0006811	ion transport	P	4
isotig03047	GO:0006955	immune response	P	4
isotig03052	GO:0019730	antimicrobial humoral response	P	4
isotig03060	GO:0015986	ATP synthesis coupled proton transport	P	4
isotig03075	GO:0006541	glutamine metabolic process	P	4
isotig03168	GO:0007422	peripheral nervous system development	P	4
isotig03174	GO:0008652	cellular amino acid biosynthetic process	P	4
isotig03184	GO:0008652	cellular amino acid biosynthetic process	P	4
isotig03237	GO:0006541	glutamine metabolic process	P	4
isotig03263	GO:0006541	glutamine metabolic process	P	4
isotig03272	GO:0006334	nucleosome assembly	P	4
isotig03323	GO:0007422	peripheral nervous system development	P	4
isotig03334	GO:0051260	protein homooligomerization	P	4
isotig03338	GO:0006811	ion transport	P	4
isotig03352	GO:0016032	viral reproduction	P	4
isotig03352	GO:0044419	interspecies interaction between organisms	P	4
isotig03382	GO:0001701	in utero embryonic development	P	4
isotig03411	GO:0046034	ATP metabolic process	P	4
isotig03457	GO:0035159	regulation of tube length, open tracheal system	P	4
isotig03457	GO:0007269	neurotransmitter secretion	P	4
isotig03457	GO:0040008	regulation of growth	P	4
isotig03481	GO:0007166	cell surface receptor signaling pathway	P	4
isotig03498	GO:0016199	axon midline choice point recognition	P	4
isotig03498	GO:0048813	dendrite morphogenesis	P	4
isotig03534	GO:0007616	long-term memory	P	4
isotig03564	GO:0007349	cellularization	P	4
isotig03617	GO:0006898	receptor-mediated endocytosis	P	4
isotig03645	GO:0022904	respiratory electron transport chain	P	4
isotig03721	GO:0007269	neurotransmitter secretion	P	4
isotig03724	GO:0009058	biosynthetic process	P	4
isotig03746	GO:0009058	biosynthetic process	P	4
isotig03815	GO:0007422	peripheral nervous system development	P	4
isotig03852	GO:0007283	spermatogenesis	P	4
isotig03902	GO:0044419	interspecies interaction between organisms	P	4
isotig03968	GO:0045859	regulation of protein kinase activity	P	4
isotig04042	GO:0045859	regulation of protein kinase activity	P	4
isotig04042	GO:0045214	sarcomere organization	P	4
isotig04083	GO:0006783	heme biosynthetic process	P	4
isotig04110	GO:0051603	proteolysis involved in cellular protein catabolic process	P	4
isotig04117	GO:0007476	imaginal disc-derived wing morphogenesis	P	4
isotig04134	GO:0032879	regulation of localization	P	4
isotig04137	GO:0051260	protein homooligomerization	P	4
isotig04150	GO:0009058	biosynthetic process	P	4
isotig04157	GO:0006334	nucleosome assembly	P	4
isotig04170	GO:0018279	protein N-linked glycosylation via asparagine	P	4
isotig04439	GO:0019083	viral transcription	P	4
isotig04439	GO:0006415	translational termination	P	4
isotig04446	GO:0042052	rhabdomere development	P	4
isotig04446	GO:0010591	regulation of lamellipodium assembly	P	4
isotig00135	GO:0051258	protein polymerization	P	5
isotig00140	GO:0051258	protein polymerization	P	5
isotig00170	GO:0051179	localization	P	5
isotig00235	GO:0006520	cellular amino acid metabolic process	P	5
isotig00296	GO:0051179	localization	P	5
isotig00296	GO:0030154	cell differentiation	P	5
isotig00308	GO:0010629	negative regulation of gene expression	P	5
isotig00308	GO:0000910	cytokinesis	P	5
isotig00308	GO:0006897	endocytosis	P	5
isotig00426	GO:0051298	centrosome duplication	P	5
isotig00576	GO:0055085	transmembrane transport	P	5
isotig00736	GO:0035220	wing disc development	P	5
isotig00761	GO:0055085	transmembrane transport	P	5
isotig00771	GO:0048522	positive regulation of cellular process	P	5
isotig00771	GO:0044238	primary metabolic process	P	5
isotig00773	GO:0035220	wing disc development	P	5
isotig00775	GO:0051258	protein polymerization	P	5
isotig00801	GO:0006103	2-oxoglutarate metabolic process	P	5
isotig00801	GO:0006099	tricarboxylic acid cycle	P	5
isotig00829	GO:0051258	protein polymerization	P	5
isotig00834	GO:0006103	2-oxoglutarate metabolic process	P	5
isotig00834	GO:0006099	tricarboxylic acid cycle	P	5
isotig00850	GO:0016310	phosphorylation	P	5
isotig00870	GO:0030154	cell differentiation	P	5
isotig00939	GO:0042742	defense response to bacterium	P	5
isotig00940	GO:0030154	cell differentiation	P	5
isotig01000	GO:0007155	cell adhesion	P	5
isotig01098	GO:0007155	cell adhesion	P	5
isotig01105	GO:0006891	intra-Golgi vesicle-mediated transport	P	5
isotig01174	GO:0000910	cytokinesis	P	5
isotig01181	GO:0055085	transmembrane transport	P	5
isotig01197	GO:0035220	wing disc development	P	5
isotig01203	GO:0032436	positive regulation of proteasomal ubiquitin-dependent protein catabolic process	P	5
isotig01203	GO:0006200	ATP catabolic process	P	5
isotig01245	GO:0007517	muscle organ development	P	5
isotig01267	GO:0032436	positive regulation of proteasomal ubiquitin-dependent protein catabolic process	P	5
isotig01275	GO:0006911	phagocytosis, engulfment	P	5
isotig01406	GO:0044238	primary metabolic process	P	5
isotig01463	GO:0045454	cell redox homeostasis	P	5
isotig01524	GO:0007155	cell adhesion	P	5
isotig01537	GO:0051298	centrosome duplication	P	5
isotig01537	GO:0043524	negative regulation of neuron apoptotic process	P	5
isotig01552	GO:0006897	endocytosis	P	5
isotig01567	GO:0048522	positive regulation of cellular process	P	5
isotig01567	GO:0044238	primary metabolic process	P	5
isotig01626	GO:0007005	mitochondrion organization	P	5
isotig01626	GO:0043524	negative regulation of neuron apoptotic process	P	5
isotig01631	GO:0032436	positive regulation of proteasomal ubiquitin-dependent protein catabolic process	P	5
isotig01726	GO:0051179	localization	P	5
isotig01745	GO:0051298	centrosome duplication	P	5
isotig01773	GO:0016310	phosphorylation	P	5
isotig01773	GO:0044238	primary metabolic process	P	5
isotig01773	GO:0030154	cell differentiation	P	5
isotig01781	GO:0046331	lateral inhibition	P	5
isotig01826	GO:0006520	cellular amino acid metabolic process	P	5
isotig01833	GO:0006916	anti-apoptosis	P	5
isotig01835	GO:0006891	intra-Golgi vesicle-mediated transport	P	5
isotig01843	GO:0055085	transmembrane transport	P	5
isotig01875	GO:0048522	positive regulation of cellular process	P	5
isotig01910	GO:0006099	tricarboxylic acid cycle	P	5
isotig01967	GO:0045454	cell redox homeostasis	P	5
isotig01973	GO:0016310	phosphorylation	P	5
isotig01977	GO:0006099	tricarboxylic acid cycle	P	5
isotig01988	GO:0043524	negative regulation of neuron apoptotic process	P	5
isotig02003	GO:0000910	cytokinesis	P	5
isotig02047	GO:0006200	ATP catabolic process	P	5
isotig02055	GO:0035220	wing disc development	P	5
isotig02055	GO:0006911	phagocytosis, engulfment	P	5
isotig02113	GO:0035220	wing disc development	P	5
isotig02152	GO:0010629	negative regulation of gene expression	P	5
isotig02207	GO:0006891	intra-Golgi vesicle-mediated transport	P	5
isotig02239	GO:0044238	primary metabolic process	P	5
isotig02247	GO:0007517	muscle organ development	P	5
isotig02265	GO:0006897	endocytosis	P	5
isotig02330	GO:0046331	lateral inhibition	P	5
isotig02340	GO:0032436	positive regulation of proteasomal ubiquitin-dependent protein catabolic process	P	5
isotig02340	GO:0006200	ATP catabolic process	P	5
isotig02341	GO:0045454	cell redox homeostasis	P	5
isotig02362	GO:0007155	cell adhesion	P	5
isotig02363	GO:0048522	positive regulation of cellular process	P	5
isotig02405	GO:0006916	anti-apoptosis	P	5
isotig02410	GO:0006916	anti-apoptosis	P	5
isotig02505	GO:0046331	lateral inhibition	P	5
isotig02506	GO:0006099	tricarboxylic acid cycle	P	5
isotig02515	GO:0006103	2-oxoglutarate metabolic process	P	5
isotig02520	GO:0042742	defense response to bacterium	P	5
isotig02566	GO:0046331	lateral inhibition	P	5
isotig02573	GO:0051179	localization	P	5
isotig02576	GO:0010629	negative regulation of gene expression	P	5
isotig02592	GO:0006520	cellular amino acid metabolic process	P	5
isotig02637	GO:0006897	endocytosis	P	5
isotig02661	GO:0051179	localization	P	5
isotig02678	GO:0042742	defense response to bacterium	P	5
isotig02679	GO:0007517	muscle organ development	P	5
isotig02774	GO:0016310	phosphorylation	P	5
isotig02782	GO:0006520	cellular amino acid metabolic process	P	5
isotig02798	GO:0032436	positive regulation of proteasomal ubiquitin-dependent protein catabolic process	P	5
isotig02835	GO:0045454	cell redox homeostasis	P	5
isotig02843	GO:0046331	lateral inhibition	P	5
isotig02927	GO:0051298	centrosome duplication	P	5
isotig02927	GO:0007155	cell adhesion	P	5
isotig02927	GO:0007444	imaginal disc development	P	5
isotig02944	GO:0010629	negative regulation of gene expression	P	5
isotig02991	GO:0051258	protein polymerization	P	5
isotig02993	GO:0006911	phagocytosis, engulfment	P	5
isotig03075	GO:0007444	imaginal disc development	P	5
isotig03075	GO:0007005	mitochondrion organization	P	5
isotig03092	GO:0042742	defense response to bacterium	P	5
isotig03109	GO:0007444	imaginal disc development	P	5
isotig03121	GO:0055085	transmembrane transport	P	5
isotig03127	GO:0006891	intra-Golgi vesicle-mediated transport	P	5
isotig03230	GO:0045454	cell redox homeostasis	P	5
isotig03237	GO:0007444	imaginal disc development	P	5
isotig03237	GO:0007005	mitochondrion organization	P	5
isotig03263	GO:0007444	imaginal disc development	P	5
isotig03263	GO:0007005	mitochondrion organization	P	5
isotig03380	GO:0030154	cell differentiation	P	5
isotig03445	GO:0006911	phagocytosis, engulfment	P	5
isotig03490	GO:0006916	anti-apoptosis	P	5
isotig03496	GO:0006911	phagocytosis, engulfment	P	5
isotig03498	GO:0007517	muscle organ development	P	5
isotig03548	GO:0051298	centrosome duplication	P	5
isotig03548	GO:0043524	negative regulation of neuron apoptotic process	P	5
isotig03564	GO:0000910	cytokinesis	P	5
isotig03587	GO:0006520	cellular amino acid metabolic process	P	5
isotig03620	GO:0042742	defense response to bacterium	P	5
isotig03671	GO:0006103	2-oxoglutarate metabolic process	P	5
isotig03719	GO:0043524	negative regulation of neuron apoptotic process	P	5
isotig03724	GO:0006103	2-oxoglutarate metabolic process	P	5
isotig03744	GO:0010629	negative regulation of gene expression	P	5
isotig03815	GO:0007517	muscle organ development	P	5
isotig03884	GO:0006200	ATP catabolic process	P	5
isotig03911	GO:0000910	cytokinesis	P	5
isotig04012	GO:0006916	anti-apoptosis	P	5
isotig04124	GO:0006897	endocytosis	P	5
isotig04150	GO:0048522	positive regulation of cellular process	P	5
isotig04166	GO:0016310	phosphorylation	P	5
isotig04246	GO:0007005	mitochondrion organization	P	5
isotig04268	GO:0006200	ATP catabolic process	P	5
isotig04435	GO:0006891	intra-Golgi vesicle-mediated transport	P	5
isotig00135	GO:0007018	microtubule-based movement	P	6
isotig00140	GO:0007018	microtubule-based movement	P	6
isotig00207	GO:0006635	fatty acid beta-oxidation	P	6
isotig00308	GO:0016055	Wnt receptor signaling pathway	P	6
isotig00308	GO:0006974	response to DNA damage stimulus	P	6
isotig00308	GO:0007298	border follicle cell migration	P	6
isotig00386	GO:0006979	response to oxidative stress	P	6
isotig00552	GO:0000381	regulation of alternative nuclear mRNA splicing, via spliceosome	P	6
isotig00606	GO:0006281	DNA repair	P	6
isotig00711	GO:0010467	gene expression	P	6
isotig00721	GO:0009408	response to heat	P	6
isotig00771	GO:0044260	cellular macromolecule metabolic process	P	6
isotig00775	GO:0007018	microtubule-based movement	P	6
isotig00780	GO:0043066	negative regulation of apoptotic process	P	6
isotig00829	GO:0007018	microtubule-based movement	P	6
isotig00834	GO:0006979	response to oxidative stress	P	6
isotig00882	GO:0042493	response to drug	P	6
isotig00894	GO:0030163	protein catabolic process	P	6
isotig00912	GO:0030036	actin cytoskeleton organization	P	6
isotig00995	GO:0065007	biological regulation	P	6
isotig01006	GO:0009408	response to heat	P	6
isotig01021	GO:0006468	protein phosphorylation	P	6
isotig01021	GO:0016055	Wnt receptor signaling pathway	P	6
isotig01022	GO:0006635	fatty acid beta-oxidation	P	6
isotig01023	GO:0042254	ribosome biogenesis	P	6
isotig01023	GO:0006281	DNA repair	P	6
isotig01067	GO:0030163	protein catabolic process	P	6
isotig01086	GO:0030433	ER-associated protein catabolic process	P	6
isotig01091	GO:0006974	response to DNA damage stimulus	P	6
isotig01102	GO:0030163	protein catabolic process	P	6
isotig01125	GO:0006468	protein phosphorylation	P	6
isotig01169	GO:0006635	fatty acid beta-oxidation	P	6
isotig01174	GO:0007298	border follicle cell migration	P	6
isotig01197	GO:0007298	border follicle cell migration	P	6
isotig01203	GO:0030433	ER-associated protein catabolic process	P	6
isotig01217	GO:0010467	gene expression	P	6
isotig01242	GO:0016055	Wnt receptor signaling pathway	P	6
isotig01245	GO:0007417	central nervous system development	P	6
isotig01249	GO:0010467	gene expression	P	6
isotig01254	GO:0006979	response to oxidative stress	P	6
isotig01278	GO:0007298	border follicle cell migration	P	6
isotig01392	GO:0044260	cellular macromolecule metabolic process	P	6
isotig01406	GO:0010467	gene expression	P	6
isotig01424	GO:0006281	DNA repair	P	6
isotig01463	GO:0006974	response to DNA damage stimulus	P	6
isotig01471	GO:0009408	response to heat	P	6
isotig01496	GO:0009408	response to heat	P	6
isotig01528	GO:0030036	actin cytoskeleton organization	P	6
isotig01529	GO:0030036	actin cytoskeleton organization	P	6
isotig01567	GO:0044260	cellular macromolecule metabolic process	P	6
isotig01692	GO:0030036	actin cytoskeleton organization	P	6
isotig01725	GO:0000381	regulation of alternative nuclear mRNA splicing, via spliceosome	P	6
isotig01726	GO:0065007	biological regulation	P	6
isotig01773	GO:0044260	cellular macromolecule metabolic process	P	6
isotig01777	GO:0007298	border follicle cell migration	P	6
isotig01840	GO:0006468	protein phosphorylation	P	6
isotig01875	GO:0044260	cellular macromolecule metabolic process	P	6
isotig02055	GO:0007018	microtubule-based movement	P	6
isotig02136	GO:0030433	ER-associated protein catabolic process	P	6
isotig02142	GO:0042493	response to drug	P	6
isotig02173	GO:0065007	biological regulation	P	6
isotig02245	GO:0030163	protein catabolic process	P	6
isotig02340	GO:0030433	ER-associated protein catabolic process	P	6
isotig02350	GO:0006974	response to DNA damage stimulus	P	6
isotig02362	GO:0042254	ribosome biogenesis	P	6
isotig02467	GO:0030433	ER-associated protein catabolic process	P	6
isotig02483	GO:0043066	negative regulation of apoptotic process	P	6
isotig02525	GO:0042254	ribosome biogenesis	P	6
isotig02565	GO:0030036	actin cytoskeleton organization	P	6
isotig02584	GO:0042493	response to drug	P	6
isotig02584	GO:0010467	gene expression	P	6
isotig02587	GO:0030433	ER-associated protein catabolic process	P	6
isotig02612	GO:0030036	actin cytoskeleton organization	P	6
isotig02661	GO:0065007	biological regulation	P	6
isotig02662	GO:0042493	response to drug	P	6
isotig02679	GO:0007417	central nervous system development	P	6
isotig02711	GO:0042254	ribosome biogenesis	P	6
isotig02723	GO:0006974	response to DNA damage stimulus	P	6
isotig02782	GO:0007417	central nervous system development	P	6
isotig02783	GO:0016055	Wnt receptor signaling pathway	P	6
isotig02802	GO:0042493	response to drug	P	6
isotig02839	GO:0065007	biological regulation	P	6
isotig02882	GO:0043066	negative regulation of apoptotic process	P	6
isotig02945	GO:0006281	DNA repair	P	6
isotig02991	GO:0007018	microtubule-based movement	P	6
isotig03010	GO:0042254	ribosome biogenesis	P	6
isotig03010	GO:0006281	DNA repair	P	6
isotig03021	GO:0009408	response to heat	P	6
isotig03047	GO:0042493	response to drug	P	6
isotig03052	GO:0000381	regulation of alternative nuclear mRNA splicing, via spliceosome	P	6
isotig03088	GO:0006281	DNA repair	P	6
isotig03147	GO:0016055	Wnt receptor signaling pathway	P	6
isotig03147	GO:0006468	protein phosphorylation	P	6
isotig03157	GO:0006635	fatty acid beta-oxidation	P	6
isotig03220	GO:0006979	response to oxidative stress	P	6
isotig03234	GO:0043066	negative regulation of apoptotic process	P	6
isotig03323	GO:0007417	central nervous system development	P	6
isotig03352	GO:0016055	Wnt receptor signaling pathway	P	6
isotig03372	GO:0042254	ribosome biogenesis	P	6
isotig03380	GO:0006468	protein phosphorylation	P	6
isotig03428	GO:0010467	gene expression	P	6
isotig03455	GO:0006974	response to DNA damage stimulus	P	6
isotig03498	GO:0007417	central nervous system development	P	6
isotig03541	GO:0030163	protein catabolic process	P	6
isotig03545	GO:0006979	response to oxidative stress	P	6
isotig03566	GO:0065007	biological regulation	P	6
[truncated: 896 more rows]

## Sheet: O.nigriventris Molecular functi
Hit	GO Term	Description	Type	Frequency
isotig00849	GO:0030414	peptidase inhibitor activity	F	1
isotig00874	GO:0002020	protease binding	F	1
isotig00895	GO:0051435	BH4 domain binding	F	1
isotig01156	GO:0015379	potassium:chloride symporter activity	F	1
isotig01529	GO:0003876	AMP deaminase activity	F	1
isotig01559	GO:0045294	alpha-catenin binding	F	1
isotig01569	GO:0004643	phosphoribosylaminoimidazolecarboxamide formyltransferase activity	F	1
isotig01569	GO:0003937	IMP cyclohydrolase activity	F	1
isotig01586	GO:0051393	alpha-actinin binding	F	1
isotig01586	GO:0031433	telethonin binding	F	1
isotig01710	GO:0004044	amidophosphoribosyltransferase activity	F	1
isotig01718	GO:0004853	uroporphyrinogen decarboxylase activity	F	1
isotig01814	GO:0008301	DNA binding, bending	F	1
isotig01859	GO:0004726	non-membrane spanning protein tyrosine phosphatase activity	F	1
isotig01907	GO:0017080	sodium channel regulator activity	F	1
isotig02018	GO:0034483	heparan sulfate sulfotransferase activity	F	1
isotig02018	GO:0034481	chondroitin sulfotransferase activity	F	1
isotig02225	GO:0004707	MAP kinase activity	F	1
isotig02228	GO:0043532	angiostatin binding	F	1
isotig02267	GO:0030551	cyclic nucleotide binding	F	1
isotig02328	GO:0030971	receptor tyrosine kinase binding	F	1
isotig02328	GO:0035256	G-protein coupled glutamate receptor binding	F	1
isotig02349	GO:0004572	mannosyl-oligosaccharide 1,3-1,6-alpha-mannosidase activity	F	1
isotig02432	GO:0070362	mitochondrial heavy strand promoter anti-sense binding	F	1
isotig02432	GO:0070182	DNA polymerase binding	F	1
isotig02432	GO:0051880	G-quadruplex DNA binding	F	1
isotig02432	GO:0070361	mitochondrial light strand promoter anti-sense binding	F	1
isotig02544	GO:0004827	proline-tRNA ligase activity	F	1
isotig02544	GO:0004818	glutamate-tRNA ligase activity	F	1
isotig02570	GO:0001784	phosphotyrosine binding	F	1
isotig02583	GO:0003878	ATP citrate synthase activity	F	1
isotig02583	GO:0004775	succinate-CoA ligase (ADP-forming) activity	F	1
isotig02591	GO:0003917	DNA topoisomerase type I activity	F	1
isotig02591	GO:0031490	chromatin DNA binding	F	1
isotig02591	GO:0003918	DNA topoisomerase (ATP-hydrolyzing) activity	F	1
isotig02639	GO:0035242	protein-arginine omega-N asymmetric methyltransferase activity	F	1
isotig02639	GO:0035241	protein-arginine omega-N monomethyltransferase activity	F	1
isotig02662	GO:0005049	nuclear export signal receptor activity	F	1
isotig02672	GO:0030295	protein kinase activator activity	F	1
isotig02672	GO:0016208	AMP binding	F	1
isotig02672	GO:0004862	cAMP-dependent protein kinase inhibitor activity	F	1
isotig02763	GO:0005247	voltage-gated chloride channel activity	F	1
isotig02792	GO:0034512	box C/D snoRNA binding	F	1
isotig02792	GO:0034513	box H/ACA snoRNA binding	F	1
isotig02802	GO:0005496	steroid binding	F	1
isotig02802	GO:0016918	retinal binding	F	1
isotig02822	GO:0008010	structural constituent of chitin-based larval cuticle	F	1
isotig02893	GO:0010484	H3 histone acetyltransferase activity	F	1
isotig02948	GO:0008448	N-acetylglucosamine-6-phosphate deacetylase activity	F	1
isotig02956	GO:0005010	insulin-like growth factor-activated receptor activity	F	1
isotig02956	GO:0005159	insulin-like growth factor receptor binding	F	1
isotig02956	GO:0005068	transmembrane receptor protein tyrosine kinase adaptor activity	F	1
isotig02958	GO:0043236	laminin binding	F	1
isotig03050	GO:0019209	kinase activator activity	F	1
isotig03078	GO:0004586	ornithine decarboxylase activity	F	1
isotig03108	GO:0016615	malate dehydrogenase activity	F	1
isotig03124	GO:0004054	arginine kinase activity	F	1
isotig03155	GO:0004123	cystathionine gamma-lyase activity	F	1
isotig03155	GO:0031071	cysteine desulfurase activity	F	1
isotig03156	GO:0004065	arylsulfatase activity	F	1
isotig03202	GO:0000010	trans-hexaprenyltranstransferase activity	F	1
isotig03280	GO:0003921	GMP synthase activity	F	1
isotig03280	GO:0003922	GMP synthase (glutamine-hydrolyzing) activity	F	1
isotig03302	GO:0004512	inositol-3-phosphate synthase activity	F	1
isotig03400	GO:0003951	NAD+ kinase activity	F	1
isotig03418	GO:0001729	ceramide kinase activity	F	1
isotig03560	GO:0031386	protein tag	F	1
isotig03582	GO:0016209	antioxidant activity	F	1
isotig03584	GO:0004749	ribose phosphate diphosphokinase activity	F	1
isotig03780	GO:0004057	arginyltransferase activity	F	1
isotig03796	GO:0048306	calcium-dependent protein binding	F	1
isotig03838	GO:0005326	neurotransmitter transporter activity	F	1
isotig03874	GO:0004109	coproporphyrinogen oxidase activity	F	1
isotig04044	GO:0008852	exodeoxyribonuclease I activity	F	1
isotig04170	GO:0008524	glucose 6-phosphate:phosphate antiporter activity	F	1
isotig04428	GO:0019789	SUMO ligase activity	F	1
isotig04482	GO:0004869	cysteine-type endopeptidase inhibitor activity	F	1
isotig04512	GO:0004081	bis(5'-nucleosyl)-tetraphosphatase (asymmetrical) activity	F	1
isotig04554	GO:0016409	palmitoyltransferase activity	F	1
isotig04664	GO:0017057	6-phosphogluconolactonase activity	F	1
isotig04862	GO:0042166	acetylcholine binding	F	1
isotig04862	GO:0043237	laminin-1 binding	F	1
isotig04862	GO:0017171	serine hydrolase activity	F	1
isotig05005	GO:0034056	estrogen response element binding	F	1
isotig05010	GO:0070577	histone acetyl-lysine binding	F	1
isotig05069	GO:0017025	TBP-class protein binding	F	1
isotig05082	GO:0005179	hormone activity	F	1
isotig05093	GO:0003957	NAD(P)+ transhydrogenase (B-specific) activity	F	1
isotig05094	GO:0004736	pyruvate carboxylase activity	F	1
isotig05108	GO:0008545	JUN kinase kinase activity	F	1
isotig05122	GO:0004705	JUN kinase activity	F	1
isotig05147	GO:0005099	Ras GTPase activator activity	F	1
isotig05164	GO:0004642	phosphoribosylformylglycinamidine synthase activity	F	1
isotig05185	GO:0051721	protein phosphatase 2A binding	F	1
isotig05185	GO:0070016	armadillo repeat domain binding	F	1
isotig05187	GO:0004500	dopamine beta-monooxygenase activity	F	1
isotig05203	GO:0031491	nucleosome binding	F	1
isotig05203	GO:0070615	nucleosome-dependent ATPase activity	F	1
isotig05228	GO:0048763	calcium-induced calcium release activity	F	1
isotig05231	GO:0008135	translation factor activity, nucleic acid binding	F	1
isotig05235	GO:0004813	alanine-tRNA ligase activity	F	1
isotig05249	GO:0018271	biotin-protein ligase activity	F	1
isotig05256	GO:0043175	RNA polymerase core enzyme binding	F	1
isotig05302	GO:0032422	purine-rich negative regulatory element binding	F	1
isotig05328	GO:0015410	manganese-transporting ATPase activity	F	1
isotig05332	GO:0008187	poly-pyrimidine tract binding	F	1
isotig05348	GO:0008494	translation activator activity	F	1
isotig05349	GO:0003994	aconitate hydratase activity	F	1
isotig05349	GO:0052632	citrate hydro-lyase (cis-aconitate-forming) activity	F	1
isotig05349	GO:0051538	3 iron, 4 sulfur cluster binding	F	1
isotig05349	GO:0052633	isocitrate hydro-lyase (cis-aconitate-forming) activity	F	1
isotig05357	GO:0035197	siRNA binding	F	1
isotig05357	GO:0035198	miRNA binding	F	1
isotig05381	GO:0003785	actin monomer binding	F	1
isotig05382	GO:0004349	glutamate 5-kinase activity	F	1
isotig05390	GO:0004306	ethanolamine-phosphate cytidylyltransferase activity	F	1
isotig05405	GO:0005229	intracellular calcium activated chloride channel activity	F	1
isotig05410	GO:0004820	glycine-tRNA ligase activity	F	1
isotig05428	GO:0003958	NADPH-hemoprotein reductase activity	F	1
isotig05438	GO:0004579	dolichyl-diphosphooligosaccharide-protein glycotransferase activity	F	1
isotig05449	GO:0005262	calcium channel activity	F	1
isotig05451	GO:0004467	long-chain fatty acid-CoA ligase activity	F	1
isotig05465	GO:0004819	glutamine-tRNA ligase activity	F	1
isotig05484	GO:0004511	tyrosine 3-monooxygenase activity	F	1
isotig05496	GO:0008142	oxysterol binding	F	1
isotig05503	GO:0052591	sn-glycerol-3-phosphate:ubiquinone-8 oxidoreductase activity	F	1
isotig05547	GO:0004683	calmodulin-dependent protein kinase activity	F	1
isotig05550	GO:0043325	phosphatidylinositol-3,4-bisphosphate binding	F	1
isotig05552	GO:0004020	adenylylsulfate kinase activity	F	1
isotig05552	GO:0004781	sulfate adenylyltransferase (ATP) activity	F	1
isotig05560	GO:0035035	histone acetyltransferase binding	F	1
isotig05569	GO:0070411	I-SMAD binding	F	1
isotig05569	GO:0030616	transforming growth factor beta receptor, common-partner cytoplasmic mediator activity	F	1
isotig05580	GO:0016402	pristanoyl-CoA oxidase activity	F	1
isotig05596	GO:0005093	Rab GDP-dissociation inhibitor activity	F	1
isotig05672	GO:0004711	ribosomal protein S6 kinase activity	F	1
isotig05681	GO:0003756	protein disulfide isomerase activity	F	1
isotig05682	GO:0010385	double-stranded methylated DNA binding	F	1
isotig05689	GO:0055131	C3HC4-type RING finger domain binding	F	1
isotig05689	GO:0010857	calcium-dependent protein kinase activity	F	1
isotig05700	GO:0016307	phosphatidylinositol phosphate kinase activity	F	1
isotig05704	GO:0000009	alpha-1,6-mannosyltransferase activity	F	1
isotig05720	GO:0008035	high-density lipoprotein particle binding	F	1
isotig05723	GO:0004610	phosphoacetylglucosamine mutase activity	F	1
isotig05741	GO:0003842	1-pyrroline-5-carboxylate dehydrogenase activity	F	1
isotig05814	GO:0008120	ceramide glucosyltransferase activity	F	1
isotig05845	GO:0003977	UDP-N-acetylglucosamine diphosphorylase activity	F	1
isotig05872	GO:0008157	protein phosphatase 1 binding	F	1
isotig05878	GO:0004594	pantothenate kinase activity	F	1
isotig05881	GO:0019955	cytokine binding	F	1
isotig05901	GO:0080025	phosphatidylinositol-3,5-bisphosphate binding	F	1
isotig05910	GO:0003989	acetyl-CoA carboxylase activity	F	1
isotig05925	GO:0004694	eukaryotic translation initiation factor 2alpha kinase activity	F	1
isotig05963	GO:0003747	translation release factor activity	F	1
isotig05965	GO:0004108	citrate (Si)-synthase activity	F	1
isotig05974	GO:0004817	cysteine-tRNA ligase activity	F	1
isotig05986	GO:0005471	ATP:ADP antiporter activity	F	1
isotig05989	GO:0016401	palmitoyl-CoA oxidase activity	F	1
isotig05992	GO:0008320	protein transmembrane transporter activity	F	1
isotig06006	GO:0003938	IMP dehydrogenase activity	F	1
isotig06035	GO:0047988	hydroxyacid-oxoacid transhydrogenase activity	F	1
isotig06041	GO:0019948	SUMO activating enzyme activity	F	1
isotig06046	GO:0003979	UDP-glucose 6-dehydrogenase activity	F	1
isotig06062	GO:0043295	glutathione binding	F	1
isotig06064	GO:0004345	glucose-6-phosphate dehydrogenase activity	F	1
isotig06078	GO:0070006	metalloaminopeptidase activity	F	1
isotig06136	GO:0005537	mannose binding	F	1
isotig06151	GO:0004347	glucose-6-phosphate isomerase activity	F	1
isotig06181	GO:0016830	carbon-carbon lyase activity	F	1
isotig06189	GO:0004619	phosphoglycerate mutase activity	F	1
isotig06194	GO:0004058	aromatic-L-amino-acid decarboxylase activity	F	1
isotig06215	GO:0003997	acyl-CoA oxidase activity	F	1
isotig06217	GO:0004491	methylmalonate-semialdehyde dehydrogenase (acylating) activity	F	1
isotig06217	GO:0018478	malonate-semialdehyde dehydrogenase (acetylating) activity	F	1
isotig06228	GO:0050750	low-density lipoprotein particle receptor binding	F	1
isotig06230	GO:0008324	cation transmembrane transporter activity	F	1
isotig06255	GO:0042562	hormone binding	F	1
isotig06278	GO:0004816	asparagine-tRNA ligase activity	F	1
isotig06280	GO:0004756	selenide, water dikinase activity	F	1
isotig06285	GO:0019706	protein-cysteine S-palmitoleyltransferase activity	F	1
isotig06285	GO:0015095	magnesium ion transmembrane transporter activity	F	1
isotig06314	GO:0048039	ubiquinone binding	F	1
isotig06314	GO:0043783	oxidoreductase activity, oxidizing metal ions with flavin as acceptor	F	1
isotig06323	GO:0044020	histone methyltransferase activity (H4-R3 specific)	F	1
isotig06324	GO:0004148	dihydrolipoyl dehydrogenase activity	F	1
isotig06325	GO:0032183	SUMO binding	F	1
isotig06331	GO:0004777	succinate-semialdehyde dehydrogenase (NAD+) activity	F	1
isotig06336	GO:0019187	beta-1,4-mannosyltransferase activity	F	1
isotig06365	GO:0004776	succinate-CoA ligase (GDP-forming) activity	F	1
isotig06382	GO:0070628	proteasome binding	F	1
isotig06390	GO:0008266	poly(U) RNA binding	F	1
isotig06391	GO:0001972	retinoic acid binding	F	1
isotig06394	GO:0004558	alpha-glucosidase activity	F	1
isotig06406	GO:0005316	high affinity inorganic phosphate:sodium symporter activity	F	1
isotig06432	GO:0016805	dipeptidase activity	F	1
isotig06432	GO:0034701	tripeptidase activity	F	1
isotig06445	GO:0004587	ornithine-oxo-acid transaminase activity	F	1
isotig06447	GO:0043566	structure-specific DNA binding	F	1
isotig06459	GO:0005381	iron ion transmembrane transporter activity	F	1
isotig06461	GO:0016842	amidine-lyase activity	F	1
isotig06473	GO:0016508	long-chain-enoyl-CoA hydratase activity	F	1
isotig06473	GO:0016509	long-chain-3-hydroxyacyl-CoA dehydrogenase activity	F	1
isotig06474	GO:0004021	L-alanine:2-oxoglutarate aminotransferase activity	F	1
isotig06503	GO:0004824	lysine-tRNA ligase activity	F	1
isotig06525	GO:0005137	interleukin-5 receptor binding	F	1
isotig06525	GO:0042043	neurexin family protein binding	F	1
isotig06525	GO:0045545	syndecan binding	F	1
isotig06525	GO:0019838	growth factor binding	F	1
isotig06565	GO:0004379	glycylpeptide N-tetradecanoyltransferase activity	F	1
isotig06566	GO:0004501	ecdysone 20-monooxygenase activity	F	1
isotig06590	GO:0015114	phosphate ion transmembrane transporter activity	F	1
isotig06601	GO:0003985	acetyl-CoA C-acetyltransferase activity	F	1
isotig06612	GO:0008260	3-oxoacid CoA-transferase activity	F	1
isotig06621	GO:0005154	epidermal growth factor receptor binding	F	1
isotig06634	GO:0004333	fumarate hydratase activity	F	1
isotig06645	GO:0004367	glycerol-3-phosphate dehydrogenase [NAD+] activity	F	1
isotig06658	GO:0004652	polynucleotide adenylyltransferase activity	F	1
isotig06670	GO:0018024	histone-lysine N-methyltransferase activity	F	1
isotig06683	GO:0015317	phosphate:hydrogen symporter activity	F	1
isotig06686	GO:0003910	DNA ligase (ATP) activity	F	1
isotig06693	GO:0008117	sphinganine-1-phosphate aldolase activity	F	1
isotig06722	GO:0003858	3-hydroxybutyrate dehydrogenase activity	F	1
isotig06732	GO:0043176	amine binding	F	1
isotig06732	GO:0004852	uroporphyrinogen-III synthase activity	F	1
isotig06732	GO:0004418	hydroxymethylbilane synthase activity	F	1
isotig06734	GO:0004372	glycine hydroxymethyltransferase activity	F	1
isotig06756	GO:0003810	protein-glutamine gamma-glutamyltransferase activity	F	1
isotig06773	GO:0004437	inositol or phosphatidylinositol phosphatase activity	F	1
isotig06784	GO:0042799	histone methyltransferase activity (H4-K20 specific)	F	1
isotig06801	GO:0019902	phosphatase binding	F	1
isotig06806	GO:0016289	CoA hydrolase activity	F	1
isotig06814	GO:0008424	glycoprotein 6-alpha-L-fucosyltransferase activity	F	1
isotig06814	GO:0046702	galactoside 6-L-fucosyltransferase activity	F	1
isotig06836	GO:0008609	alkylglycerone-phosphate synthase activity	F	1
isotig06884	GO:0004069	L-aspartate:2-oxoglutarate aminotransferase activity	F	1
isotig06893	GO:0046964	3'-phosphoadenosine 5'-phosphosulfate transmembrane transporter activity	F	1
isotig06903	GO:0004772	sterol O-acyltransferase activity	F	1
isotig06908	GO:0000988	protein binding transcription factor activity	F	1
isotig06927	GO:0016742	hydroxymethyl-, formyl- and related transferase activity	F	1
isotig06927	GO:0016879	ligase activity, forming carbon-nitrogen bonds	F	1
isotig06931	GO:0030612	arsenate reductase (thioredoxin) activity	F	1
isotig06939	GO:0004730	pseudouridylate synthase activity	F	1
isotig06989	GO:0004103	choline kinase activity	F	1
isotig06989	GO:0004305	ethanolamine kinase activity	F	1
isotig07002	GO:0031996	thioesterase binding	F	1
isotig07020	GO:0016627	oxidoreductase activity, acting on the CH-CH group of donors	F	1
isotig07037	GO:0004860	protein kinase inhibitor activity	F	1
isotig07052	GO:0004632	phosphopantothenate--cysteine ligase activity	F	1
isotig07127	GO:0004459	L-lactate dehydrogenase activity	F	1
isotig07138	GO:0015386	potassium:hydrogen antiporter activity	F	1
isotig07156	GO:0050291	sphingosine N-acyltransferase activity	F	1
isotig07200	GO:0003725	double-stranded RNA binding	F	1
isotig07216	GO:0031683	G-protein beta/gamma-subunit complex binding	F	1
isotig07236	GO:0019811	cocaine binding	F	1
isotig07236	GO:0004059	aralkylamine N-acetyltransferase activity	F	1
isotig07236	GO:0004060	arylamine N-acetyltransferase activity	F	1
isotig07266	GO:0008336	gamma-butyrobetaine dioxygenase activity	F	1
isotig07303	GO:0004169	dolichyl-phosphate-mannose-protein mannosyltransferase activity	F	1
isotig07316	GO:0001965	G-protein alpha-subunit binding	F	1
isotig07329	GO:0030292	protein tyrosine kinase inhibitor activity	F	1
isotig07341	GO:0032934	sterol binding	F	1
isotig07343	GO:0008568	microtubule-severing ATPase activity	F	1
isotig07346	GO:0019781	NEDD8 activating enzyme activity	F	1
isotig07348	GO:0008420	CTD phosphatase activity	F	1
isotig07356	GO:0004342	glucosamine-6-phosphate deaminase activity	F	1
isotig07357	GO:0003844	1,4-alpha-glucan branching enzyme activity	F	1
isotig07360	GO:0070491	repressing transcription factor binding	F	1
isotig07360	GO:0030955	potassium ion binding	F	1
isotig07360	GO:0017136	NAD-dependent histone deacetylase activity	F	1
isotig07372	GO:0035312	5'-3' exodeoxyribonuclease activity	F	1
isotig07372	GO:0008310	single-stranded DNA specific 3'-5' exodeoxyribonuclease activity	F	1
isotig07372	GO:0008311	double-stranded DNA specific 3'-5' exodeoxyribonuclease activity	F	1
isotig07372	GO:0004520	endodeoxyribonuclease activity	F	1
isotig07383	GO:0003880	protein C-terminal carboxyl O-methyltransferase activity	F	1
isotig07388	GO:0042806	fucose binding	F	1
isotig07391	GO:0008641	small protein activating enzyme activity	F	1
isotig07397	GO:0004361	glutaryl-CoA dehydrogenase activity	F	1
isotig07399	GO:0004739	pyruvate dehydrogenase (acetyl-transferring) activity	F	1
isotig07415	GO:0004658	propionyl-CoA carboxylase activity	F	1
isotig07423	GO:0030228	lipoprotein particle receptor activity	F	1
isotig07436	GO:0004445	inositol-polyphosphate 5-phosphatase activity	F	1
isotig07455	GO:0004421	hydroxymethylglutaryl-CoA synthase activity	F	1
isotig07501	GO:0004056	argininosuccinate lyase activity	F	1
isotig07511	GO:0008262	importin-alpha export receptor activity	F	1
isotig07519	GO:0004994	somatostatin receptor activity	F	1
isotig07530	GO:0000340	RNA 7-methylguanosine cap binding	F	1
isotig07533	GO:0008649	rRNA methyltransferase activity	F	1
isotig07561	GO:0018738	S-formylglutathione hydrolase activity	F	1
isotig07563	GO:0008521	acetyl-CoA transporter activity	F	1
isotig07568	GO:0008441	3'(2'),5'-bisphosphate nucleotidase activity	F	1
isotig07571	GO:0004855	xanthine oxidase activity	F	1
isotig07573	GO:0008486	diphosphoinositol-polyphosphate diphosphatase activity	F	1
isotig07588	GO:0004046	aminoacylase activity	F	1
isotig07595	GO:0004084	branched-chain-amino-acid transaminase activity	F	1
isotig07609	GO:0015367	oxoglutarate:malate antiporter activity	F	1
isotig07624	GO:0008375	acetylglucosaminyltransferase activity	F	1
isotig07644	GO:0004534	5'-3' exoribonuclease activity	F	1
isotig07668	GO:0016768	spermine synthase activity	F	1
isotig07670	GO:0015144	carbohydrate transmembrane transporter activity	F	1
isotig07673	GO:0004823	leucine-tRNA ligase activity	F	1
isotig07699	GO:0001968	fibronectin binding	F	1
isotig07699	GO:0043395	heparan sulfate proteoglycan binding	F	1
isotig07699	GO:0005499	vitamin D binding	F	1
isotig07726	GO:0045295	gamma-catenin binding	F	1
isotig07728	GO:0019829	cation-transporting ATPase activity	F	1
isotig07728	GO:0015247	aminophospholipid transporter activity	F	1
isotig07730	GO:0042289	MHC class II protein binding	F	1
isotig07787	GO:0003826	alpha-ketoacid dehydrogenase activity	F	1
isotig07811	GO:0008376	acetylgalactosaminyltransferase activity	F	1
isotig07815	GO:0046969	NAD-dependent histone deacetylase activity (H3-K9 specific)	F	1
isotig07815	GO:0032041	NAD-dependent histone deacetylase activity (H3-K14 specific)	F	1
isotig07815	GO:0034739	histone deacetylase activity (H4-K16 specific)	F	1
isotig07815	GO:0046970	NAD-dependent histone deacetylase activity (H4-K16 specific)	F	1
isotig07816	GO:0004659	prenyltransferase activity	F	1
isotig07861	GO:0042132	fructose 1,6-bisphosphate 1-phosphatase activity	F	1
isotig07877	GO:0008239	dipeptidyl-peptidase activity	F	1
isotig07885	GO:0004139	deoxyribose-phosphate aldolase activity	F	1
isotig07908	GO:0004830	tryptophan-tRNA ligase activity	F	1
isotig07972	GO:0004152	dihydroorotate dehydrogenase activity	F	1
isotig07972	GO:0017113	dihydropyrimidine dehydrogenase (NADP+) activity	F	1
isotig07991	GO:0003906	DNA-(apurinic or apyrimidinic site) lyase activity	F	1
isotig08004	GO:0001872	(1->3)-beta-D-glucan binding	F	1
isotig08009	GO:0016538	cyclin-dependent protein kinase regulator activity	F	1
isotig08024	GO:0003831	beta-N-acetylglucosaminylglycopeptide beta-1,4-galactosyltransferase activity	F	1
isotig08031	GO:0050614	delta24-sterol reductase activity	F	1
isotig08032	GO:0004128	cytochrome-b5 reductase activity	F	1
isotig08033	GO:0004748	ribonucleoside-diphosphate reductase activity, thioredoxin disulfide as acceptor	F	1
isotig08036	GO:0016909	SAP kinase activity	F	1
isotig08058	GO:0019776	Atg8 ligase activity	F	1
isotig08058	GO:0019777	Atg12 ligase activity	F	1
isotig08061	GO:0004648	O-phospho-L-serine:2-oxoglutarate aminotransferase activity	F	1
isotig08075	GO:0030060	L-malate dehydrogenase activity	F	1
isotig08081	GO:0004489	methylenetetrahydrofolate reductase (NADPH) activity	F	1
isotig08103	GO:0043208	glycosphingolipid binding	F	1
isotig08138	GO:0005110	frizzled-2 binding	F	1
isotig08138	GO:0016015	morphogen activity	F	1
isotig08138	GO:0050840	extracellular matrix binding	F	1
isotig08138	GO:0043499	eukaryotic cell surface binding	F	1
isotig08223	GO:0005250	A-type (transient outward) potassium channel activity	F	1
isotig08258	GO:0019842	vitamin binding	F	1
isotig08260	GO:0016758	transferase activity, transferring hexosyl groups	F	1
isotig08272	GO:0008276	protein methyltransferase activity	F	1
isotig08293	GO:0004839	ubiquitin activating enzyme activity	F	1
isotig08331	GO:0050062	long-chain-fatty-acyl-CoA reductase activity	F	1
isotig08435	GO:0034450	ubiquitin-ubiquitin ligase activity	F	1
isotig08435	GO:0051879	Hsp90 protein binding	F	1
isotig08435	GO:0030911	TPR domain binding	F	1
isotig08461	GO:0016811	hydrolase activity, acting on carbon-nitrogen (but not peptide) bonds, in linear amides	F	1
isotig08461	GO:0070403	NAD+ binding	F	1
isotig08503	GO:0050699	WW domain binding	F	1
isotig08570	GO:0070463	tubulin-dependent ATPase activity	F	1
isotig08604	GO:0047560	3-dehydrosphinganine reductase activity	F	1
isotig08608	GO:0004055	argininosuccinate synthase activity	F	1
isotig08610	GO:0019205	nucleobase-containing compound kinase activity	F	1
isotig08702	GO:0004807	triose-phosphate isomerase activity	F	1
isotig08720	GO:0004838	L-tyrosine:2-oxoglutarate aminotransferase activity	F	1
isotig08743	GO:0008934	inositol monophosphate 1-phosphatase activity	F	1
isotig08747	GO:0000293	ferric-chelate reductase activity	F	1
isotig08758	GO:0016929	SUMO-specific protease activity	F	1
isotig08789	GO:0003948	N4-(beta-N-acetylglucosaminyl)-L-asparaginase activity	F	1
isotig08820	GO:0051903	S-(hydroxymethyl)glutathione dehydrogenase activity	F	1
isotig08820	GO:0004022	alcohol dehydrogenase (NAD) activity	F	1
isotig08828	GO:0046873	metal ion transmembrane transporter activity	F	1
isotig08839	GO:0015248	sterol transporter activity	F	1
isotig08839	GO:0032559	adenyl ribonucleotide binding	F	1
isotig08858	GO:0004849	uridine kinase activity	F	1
isotig08862	GO:0004560	alpha-L-fucosidase activity	F	1
isotig08898	GO:0004003	ATP-dependent DNA helicase activity	F	1
isotig08907	GO:0004676	3-phosphoinositide-dependent protein kinase activity	F	1
isotig09052	GO:0035575	histone demethylase activity (H4-K20 specific)	F	1
isotig09052	GO:0051864	histone demethylase activity (H3-K36 specific)	F	1
isotig09052	GO:0032454	histone demethylase activity (H3-K9 specific)	F	1
isotig09052	GO:0071558	histone demethylase activity (H3-K27 specific)	F	1
isotig09102	GO:0017120	polyphosphatidylinositol phosphatase activity	F	1
isotig09106	GO:0035591	signaling adaptor activity	F	1
isotig09115	GO:0004155	6,7-dihydropteridine reductase activity	F	1
isotig09120	GO:0043533	inositol 1,3,4,5 tetrakisphosphate binding	F	1
isotig09131	GO:0016175	superoxide-generating NADPH oxidase activity	F	1
isotig09131	GO:0015252	hydrogen ion channel activity	F	1
isotig09149	GO:0003837	beta-ureidopropionase activity	F	1
isotig09185	GO:0048185	activin binding	F	1
isotig09185	GO:0048184	follistatin binding	F	1
isotig09185	GO:0016361	activin receptor activity, type I	F	1
isotig09191	GO:0008419	RNA lariat debranching enzyme activity	F	1
isotig09193	GO:0035257	nuclear hormone receptor binding	F	1
isotig09214	GO:0017151	DEAD/H-box RNA helicase binding	F	1
isotig09230	GO:0047756	chondroitin 4-sulfotransferase activity	F	1
isotig09230	GO:0001537	N-acetylgalactosamine 4-O-sulfotransferase activity	F	1
isotig09239	GO:0005053	peroxisome matrix targeting signal-2 binding	F	1
isotig09281	GO:0015355	secondary active monocarboxylate transmembrane transporter activity	F	1
isotig09301	GO:0000179	rRNA (adenine-N6,N6-)-dimethyltransferase activity	F	1
isotig09314	GO:0001888	glucuronyl-galactosyl-proteoglycan 4-alpha-N-acetylglucosaminyltransferase activity	F	1
isotig09314	GO:0042328	heparan sulfate N-acetylglucosaminyltransferase activity	F	1
isotig09337	GO:0005046	KDEL sequence binding	F	1
isotig09346	GO:0004595	pantetheine-phosphate adenylyltransferase activity	F	1
isotig09346	GO:0004140	dephospho-CoA kinase activity	F	1
isotig09359	GO:0008374	O-acyltransferase activity	F	1
isotig09423	GO:0003684	damaged DNA binding	F	1
isotig09423	GO:0043142	single-stranded DNA-dependent ATPase activity	F	1
isotig09428	GO:0035243	protein-arginine omega-N symmetric methyltransferase activity	F	1
isotig09433	GO:0004475	mannose-1-phosphate guanylyltransferase activity	F	1
isotig09470	GO:0042578	phosphoric ester hydrolase activity	F	1
isotig09494	GO:0047555	3',5'-cyclic-GMP phosphodiesterase activity	F	1
isotig09550	GO:0031420	alkali metal ion binding	F	1
isotig09554	GO:0047545	2-hydroxyglutarate dehydrogenase activity	F	1
isotig09555	GO:0008493	tetracycline transporter activity	F	1
isotig09558	GO:0004463	leukotriene-A4 hydrolase activity	F	1
isotig09558	GO:0004301	epoxide hydrolase activity	F	1
isotig09565	GO:0004731	purine-nucleoside phosphorylase activity	F	1
isotig09572	GO:0004343	glucosamine 6-phosphate N-acetyltransferase activity	F	1
isotig09577	GO:0004017	adenylate kinase activity	F	1
isotig09580	GO:0052381	tRNA dimethylallyltransferase activity	F	1
isotig09607	GO:0019200	carbohydrate kinase activity	F	1
isotig09629	GO:0017128	phospholipid scramblase activity	F	1
isotig09641	GO:0046525	xylosylprotein 4-beta-galactosyltransferase activity	F	1
isotig09656	GO:0004655	porphobilinogen synthase activity	F	1
isotig09656	GO:0032791	lead ion binding	F	1
isotig09672	GO:0004833	tryptophan 2,3-dioxygenase activity	F	1
isotig09800	GO:0008455	alpha-1,6-mannosylglycoprotein 2-beta-N-acetylglucosaminyltransferase activity	F	1
isotig09844	GO:0004799	thymidylate synthase activity	F	1
isotig09844	GO:0005542	folic acid binding	F	1
isotig09852	GO:0048040	UDP-glucuronate decarboxylase activity	F	1
isotig09854	GO:0043522	leucine zipper domain binding	F	1
isotig09915	GO:0004067	asparaginase activity	F	1
isotig09929	GO:0016443	bidentate ribonuclease III activity	F	1
isotig09946	GO:0004428	inositol or phosphatidylinositol kinase activity	F	1
isotig10001	GO:0004663	Rab geranylgeranyltransferase activity	F	1
isotig10016	GO:0017174	glycine N-methyltransferase activity	F	1
isotig10019	GO:0034485	phosphatidylinositol-3,4,5-trisphosphate 5-phosphatase activity	F	1
isotig10039	GO:0050811	GABA receptor binding	F	1
isotig10055	GO:0017075	syntaxin-1 binding	F	1
isotig10102	GO:0050998	nitric-oxide synthase binding	F	1
isotig10138	GO:0004768	stearoyl-CoA 9-desaturase activity	F	1
isotig10163	GO:0035614	snRNA stem-loop binding	F	1
isotig10163	GO:0030619	U1 snRNA binding	F	1
isotig10163	GO:0030620	U2 snRNA binding	F	1
isotig10173	GO:0008242	omega peptidase activity	F	1
isotig10182	GO:0008488	gamma-glutamyl carboxylase activity	F	1
isotig10237	GO:0008329	pattern recognition receptor activity	F	1
isotig10237	GO:0051736	ATP-dependent polyribonucleotide 5'-hydroxyl-kinase activity	F	1
isotig10240	GO:0004750	ribulose-phosphate 3-epimerase activity	F	1
isotig10242	GO:0030676	Rac guanyl-nucleotide exchange factor activity	F	1
isotig10242	GO:0042608	T cell receptor binding	F	1
isotig10351	GO:0005088	Ras guanyl-nucleotide exchange factor activity	F	1
isotig10403	GO:0001102	RNA polymerase II activating transcription factor binding	F	1
isotig10403	GO:0005160	transforming growth factor beta receptor binding	F	1
isotig10403	GO:0003706	ligand-regulated transcription factor activity	F	1
isotig10495	GO:0004490	methylglutaconyl-CoA hydratase activity	F	1
isotig10511	GO:0060001	minus-end directed microfilament motor activity	F	1
isotig10521	GO:0005504	fatty acid binding	F	1
isotig10525	GO:0015421	oligopeptide-transporting ATPase activity	F	1
isotig10567	GO:0004420	hydroxymethylglutaryl-CoA reductase (NADPH) activity	F	1
isotig10570	GO:0015016	[heparan sulfate]-glucosamine N-sulfotransferase activity	F	1
isotig10592	GO:0004449	isocitrate dehydrogenase (NAD+) activity	F	1
isotig10597	GO:0009881	photoreceptor activity	F	1
isotig10602	GO:0017046	peptide hormone binding	F	1
isotig10653	GO:0019136	deoxynucleoside kinase activity	F	1
isotig10696	GO:0016763	transferase activity, transferring pentosyl groups	F	1
isotig10700	GO:0005048	signal sequence binding	F	1
isotig10706	GO:0004430	1-phosphatidylinositol 4-kinase activity	F	1
isotig10707	GO:0008083	growth factor activity	F	1
isotig10708	GO:0018488	aryl-aldehyde oxidase activity	F	1
isotig10739	GO:0033829	O-fucosylpeptide 3-beta-N-acetylglucosaminyltransferase activity	F	1
isotig10766	GO:0016403	dimethylargininase activity	F	1
isotig10791	GO:0046966	thyroid hormone receptor binding	F	1
isotig10791	GO:0051425	PTB domain binding	F	1
isotig10807	GO:0046914	transition metal ion binding	F	1
isotig10833	GO:0000155	two-component sensor activity	F	1
isotig10849	GO:0070780	dihydrosphingosine-1-phosphate phosphatase activity	F	1
isotig10849	GO:0042392	sphingosine-1-phosphate phosphatase activity	F	1
isotig10945	GO:0032947	protein complex scaffold	F	1
isotig10954	GO:0015643	toxin binding	F	1
isotig10962	GO:0047022	7-beta-hydroxysteroid dehydrogenase (NADP+) activity	F	1
isotig10962	GO:0018454	acetoacetyl-CoA reductase activity	F	1
isotig10962	GO:0047035	testosterone dehydrogenase (NAD+) activity	F	1
isotig10975	GO:0031418	L-ascorbic acid binding	F	1
isotig10989	GO:0008081	phosphoric diester hydrolase activity	F	1
isotig10990	GO:0004661	protein geranylgeranyltransferase activity	F	1
isotig10990	GO:0004660	protein farnesyltransferase activity	F	1
isotig11037	GO:0004831	tyrosine-tRNA ligase activity	F	1
isotig11039	GO:0004357	glutamate-cysteine ligase activity	F	1
isotig11040	GO:0046570	methylthioribulose 1-phosphate dehydratase activity	F	1
isotig11047	GO:0003847	1-alkyl-2-acetylglycerophosphocholine esterase activity	F	1
isotig11058	GO:0070990	snRNP binding	F	1
isotig11090	GO:0046975	histone methyltransferase activity (H3-K36 specific)	F	1
isotig11113	GO:0018169	ribosomal S6-glutamic acid ligase activity	F	1
isotig11131	GO:0016462	pyrophosphatase activity	F	1
isotig11162	GO:0051636	Gram-negative bacterial cell surface binding	F	1
isotig11162	GO:0016019	peptidoglycan receptor activity	F	1
isotig11166	GO:0070064	proline-rich region binding	F	1
isotig11166	GO:0008093	cytoskeletal adaptor activity	F	1
isotig11230	GO:0033699	DNA 5'-adenosine monophosphate hydrolase activity	F	1
isotig11284	GO:0004745	retinol dehydrogenase activity	F	1
isotig11385	GO:0019905	syntaxin binding	F	1
isotig11413	GO:0004315	3-oxoacyl-[acyl-carrier-protein] synthase activity	F	1
isotig11427	GO:0003709	RNA polymerase III transcription factor activity	F	1
isotig11428	GO:0004016	adenylate cyclase activity	F	1
isotig11460	GO:0042609	CD4 receptor binding	F	1
isotig11465	GO:0004622	lysophospholipase activity	F	1
isotig11492	GO:0003950	NAD+ ADP-ribosyltransferase activity	F	1
isotig11525	GO:0008379	thioredoxin peroxidase activity	F	1
isotig11572	GO:0005452	inorganic anion exchanger activity	F	1
isotig11620	GO:0004532	exoribonuclease activity	F	1
isotig11680	GO:0004708	MAP kinase kinase activity	F	1
isotig11680	GO:0004709	MAP kinase kinase kinase activity	F	1
isotig11687	GO:0010349	L-galactose dehydrogenase activity	F	1
isotig11762	GO:0043274	phospholipase binding	F	1
isotig11762	GO:0016004	phospholipase activator activity	F	1
isotig11775	GO:0016404	15-hydroxyprostaglandin dehydrogenase (NAD+) activity	F	1
isotig11779	GO:0048029	monosaccharide binding	F	1
isotig11779	GO:0004802	transketolase activity	F	1
isotig11867	GO:0004653	polypeptide N-acetylgalactosaminyltransferase activity	F	1
isotig11952	GO:0004576	oligosaccharyl transferase activity	F	1
isotig11952	GO:0004581	dolichyl-phosphate beta-glucosyltransferase activity	F	1
isotig11962	GO:0045309	protein phosphorylated amino acid binding	F	1
isotig11974	GO:0019903	protein phosphatase binding	F	1
isotig11983	GO:0004164	diphthine synthase activity	F	1
isotig12065	GO:0030559	rRNA pseudouridylation guide activity	F	1
isotig12109	GO:0005461	UDP-glucuronic acid transmembrane transporter activity	F	1
isotig12109	GO:0005458	GDP-mannose transmembrane transporter activity	F	1
isotig12109	GO:0005464	UDP-xylose transmembrane transporter activity	F	1
isotig12109	GO:0005460	UDP-glucose transmembrane transporter activity	F	1
isotig12109	GO:0005457	GDP-fucose transmembrane transporter activity	F	1
isotig12109	GO:0005462	UDP-N-acetylglucosamine transmembrane transporter activity	F	1
isotig12109	GO:0005456	CMP-N-acetylneuraminate transmembrane transporter activity	F	1
isotig12184	GO:0008327	methyl-CpG binding	F	1
isotig12227	GO:0005125	cytokine activity	F	1
isotig12227	GO:0043498	cell surface binding	F	1
isotig12235	GO:0004497	monooxygenase activity	F	1
isotig12241	GO:0035250	UDP-galactosyltransferase activity	F	1
isotig12248	GO:0003896	DNA primase activity	F	1
isotig12252	GO:0008526	phosphatidylinositol transporter activity	F	1
isotig12261	GO:0016314	phosphatidylinositol-3,4,5-trisphosphate 3-phosphatase activity	F	1
isotig12261	GO:0004438	phosphatidylinositol-3-phosphatase activity	F	1
isotig12261	GO:0051717	inositol-1,3,4,5-tetrakisphosphate 3-phosphatase activity	F	1
isotig12261	GO:0051800	phosphatidylinositol-3,4-bisphosphate 3-phosphatase activity	F	1
isotig12347	GO:0016565	general transcriptional repressor activity	F	1
isotig12386	GO:0070330	aromatase activity	F	1
isotig12404	GO:0008113	peptide-methionine-(S)-S-oxide reductase activity	F	1
isotig12404	GO:0033743	peptide-methionine (R)-S-oxide reductase activity	F	1
isotig12424	GO:0003874	6-pyruvoyltetrahydropterin synthase activity	F	1
isotig12432	GO:0033677	DNA/RNA helicase activity	F	1
isotig12432	GO:0004527	exonuclease activity	F	1
isotig12491	GO:0004620	phospholipase activity	F	1
isotig12514	GO:0004566	beta-glucuronidase activity	F	1
isotig12534	GO:0008474	palmitoyl-(protein) hydrolase activity	F	1
isotig12539	GO:0016308	1-phosphatidylinositol-4-phosphate 5-kinase activity	F	1
isotig12574	GO:0004890	GABA-A receptor activity	F	1
isotig12574	GO:0030594	neurotransmitter receptor activity	F	1
isotig12580	GO:0004970	ionotropic glutamate receptor activity	F	1
isotig12651	GO:0015377	cation:chloride symporter activity	F	1
isotig12689	GO:0070579	methylcytosine dioxygenase activity	F	1
isotig12756	GO:0047077	Photinus-luciferin 4-monooxygenase (ATP-hydrolyzing) activity	F	1
isotig12822	GO:0008194	UDP-glycosyltransferase activity	F	1
isotig12833	GO:0003923	GPI-anchor transamidase activity	F	1
isotig12939	GO:0008146	sulfotransferase activity	F	1
isotig12941	GO:0047499	calcium-independent phospholipase A2 activity	F	1
isotig12956	GO:0061133	endopeptidase activator activity	F	1
isotig12962	GO:0004324	ferredoxin-NADP+ reductase activity	F	1
isotig13056	GO:0042980	cystic fibrosis transmembrane conductance regulator binding	F	1
isotig13104	GO:0004088	carbamoyl-phosphate synthase (glutamine-hydrolyzing) activity	F	1
isotig13104	GO:0070335	aspartate binding	F	1
isotig13104	GO:0004070	aspartate carbamoyltransferase activity	F	1
isotig13104	GO:0004151	dihydroorotase activity	F	1
isotig13161	GO:0004797	thymidine kinase activity	F	1
isotig13211	GO:0005214	structural constituent of chitin-based cuticle	F	1
isotig13220	GO:0008294	calcium- and calmodulin-responsive adenylate cyclase activity	F	1
isotig13277	GO:0004583	dolichyl-phosphate-glucose-glycolipid alpha-glucosyltransferase activity	F	1
isotig13325	GO:0016803	ether hydrolase activity	F	1
isotig13357	GO:0008425	2-polyprenyl-6-methoxy-1,4-benzoquinone methyltransferase activity	F	1
isotig13444	GO:0015450	P-P-bond-hydrolysis-driven protein transmembrane transporter activity	F	1
isotig13491	GO:0004582	dolichyl-phosphate beta-D-mannosyltransferase activity	F	1
isotig13547	GO:0046403	polynucleotide 3'-phosphatase activity	F	1
isotig13550	GO:0004556	alpha-amylase activity	F	1
isotig13568	GO:0004061	arylformamidase activity	F	1
isotig13607	GO:0008124	4-alpha-hydroxytetrahydrobiopterin dehydratase activity	F	1
isotig13619	GO:0043139	5'-3' DNA helicase activity	F	1
isotig13623	GO:0016433	rRNA (adenine) methyltransferase activity	F	1
isotig13627	GO:0043015	gamma-tubulin binding	F	1
isotig13712	GO:0045502	dynein binding	F	1
isotig13737	GO:0004453	juvenile-hormone esterase activity	F	1
isotig13790	GO:0008191	metalloendopeptidase inhibitor activity	F	1
isotig00895	GO:0017166	vinculin binding	F	2
isotig00895	GO:0030159	receptor signaling complex scaffold activity	F	2
isotig00991	GO:0004503	monophenol monooxygenase activity	F	2
isotig01076	GO:0016922	ligand-dependent nuclear receptor binding	F	2
isotig01086	GO:0017166	vinculin binding	F	2
isotig01384	GO:0030276	clathrin binding	F	2
isotig01789	GO:0017022	myosin binding	F	2
isotig01934	GO:0022891	substrate-specific transmembrane transporter activity	F	2
isotig01973	GO:0004518	nuclease activity	F	2
isotig02267	GO:0008603	cAMP-dependent protein kinase regulator activity	F	2
isotig02309	GO:0030274	LIM domain binding	F	2
isotig02312	GO:0005507	copper ion binding	F	2
isotig02328	GO:0046875	ephrin receptor binding	F	2
isotig02349	GO:0004559	alpha-mannosidase activity	F	2
isotig02416	GO:0008238	exopeptidase activity	F	2
isotig02427	GO:0004568	chitinase activity	F	2
isotig02427	GO:0008061	chitin binding	F	2
isotig02432	GO:0004176	ATP-dependent peptidase activity	F	2
isotig02537	GO:0005388	calcium-transporting ATPase activity	F	2
isotig02558	GO:0051011	microtubule minus-end binding	F	2
isotig02568	GO:0043560	insulin receptor substrate binding	F	2
isotig02573	GO:0043548	phosphatidylinositol 3-kinase binding	F	2
isotig02576	GO:0050733	RS domain binding	F	2
isotig02672	GO:0008603	cAMP-dependent protein kinase regulator activity	F	2
isotig02672	GO:0004679	AMP-activated protein kinase activity	F	2
isotig02672	GO:0008607	phosphorylase kinase regulator activity	F	2
isotig02734	GO:0030274	LIM domain binding	F	2
isotig02750	GO:0017016	Ras GTPase binding	F	2
isotig02792	GO:0008139	nuclear localization sequence binding	F	2
isotig02810	GO:0004675	transmembrane receptor protein serine/threonine kinase activity	F	2
isotig02814	GO:0043492	ATPase activity, coupled to movement of substances	F	2
isotig02814	GO:0022892	substrate-specific transporter activity	F	2
isotig02825	GO:0004715	non-membrane spanning protein tyrosine kinase activity	F	2
isotig02860	GO:0017016	Ras GTPase binding	F	2
isotig02890	GO:0030618	transforming growth factor beta receptor, pathway-specific cytoplasmic mediator activity	F	2
isotig02956	GO:0043548	phosphatidylinositol 3-kinase binding	F	2
isotig02956	GO:0005158	insulin receptor binding	F	2
isotig02975	GO:0004013	adenosylhomocysteinase activity	F	2
isotig03076	GO:0030276	clathrin binding	F	2
isotig03180	GO:0004559	alpha-mannosidase activity	F	2
isotig03242	GO:0015020	glucuronosyltransferase activity	F	2
isotig03318	GO:0005351	sugar:hydrogen symporter activity	F	2
isotig03322	GO:0003988	acetyl-CoA C-acyltransferase activity	F	2
isotig03354	GO:0004028	3-chloroallyl aldehyde dehydrogenase activity	F	2
isotig03376	GO:0019992	diacylglycerol binding	F	2
isotig03386	GO:0005245	voltage-gated calcium channel activity	F	2
isotig03412	GO:0047238	glucuronosyl-N-acetylgalactosaminyl-proteoglycan 4-beta-N-acetylgalactosaminyltransferase activity	F	2
isotig03540	GO:0016407	acetyltransferase activity	F	2
isotig03602	GO:0030515	snoRNA binding	F	2
isotig03646	GO:0005242	inward rectifier potassium channel activity	F	2
isotig03666	GO:0004568	chitinase activity	F	2
isotig03714	GO:0051635	bacterial cell surface binding	F	2
isotig03720	GO:0016863	intramolecular oxidoreductase activity, transposing C=C bonds	F	2
isotig03964	GO:0003841	1-acylglycerol-3-phosphate O-acyltransferase activity	F	2
isotig04012	GO:0005095	GTPase inhibitor activity	F	2
isotig04102	GO:0015036	disulfide oxidoreductase activity	F	2
isotig04158	GO:0004715	non-membrane spanning protein tyrosine kinase activity	F	2
isotig04158	GO:0004766	spermidine synthase activity	F	2
isotig04428	GO:0030331	estrogen receptor binding	F	2
isotig04428	GO:0035259	glucocorticoid receptor binding	F	2
isotig04862	GO:0003990	acetylcholinesterase activity	F	2
isotig04862	GO:0004104	cholinesterase activity	F	2
isotig05010	GO:0008094	DNA-dependent ATPase activity	F	2
isotig05094	GO:0009374	biotin binding	F	2
isotig05098	GO:0008843	endochitinase activity	F	2
isotig05098	GO:0008061	chitin binding	F	2
isotig05104	GO:0008843	endochitinase activity	F	2
isotig05105	GO:0008536	Ran GTPase binding	F	2
isotig05105	GO:0005095	GTPase inhibitor activity	F	2
isotig05108	GO:0004702	receptor signaling protein serine/threonine kinase activity	F	2
isotig05113	GO:0005083	small GTPase regulator activity	F	2
isotig05113	GO:0008536	Ran GTPase binding	F	2
isotig05119	GO:0042813	Wnt-activated receptor activity	F	2
isotig05123	GO:0016624	oxidoreductase activity, acting on the aldehyde or oxo group of donors, disulfide as acceptor	F	2
isotig05138	GO:0050839	cell adhesion molecule binding	F	2
isotig05172	GO:0015301	anion:anion antiporter activity	F	2
isotig05203	GO:0008094	DNA-dependent ATPase activity	F	2
isotig05217	GO:0004854	xanthine dehydrogenase activity	F	2
isotig05217	GO:0043546	molybdopterin cofactor binding	F	2
isotig05228	GO:0015279	store-operated calcium channel activity	F	2
isotig05229	GO:0004366	glycerol-3-phosphate O-acyltransferase activity	F	2
isotig05248	GO:0016274	protein-arginine N-methyltransferase activity	F	2
isotig05273	GO:0004029	aldehyde dehydrogenase (NAD) activity	F	2
isotig05275	GO:0004176	ATP-dependent peptidase activity	F	2
isotig05302	GO:0000900	translation repressor activity, nucleic acid binding	F	2
isotig05318	GO:0070742	C2H2 zinc finger domain binding	F	2
isotig05328	GO:0005388	calcium-transporting ATPase activity	F	2
isotig05333	GO:0008238	exopeptidase activity	F	2
isotig05359	GO:0004864	protein phosphatase inhibitor activity	F	2
isotig05400	GO:0016705	oxidoreductase activity, acting on paired donors, with incorporation or reduction of molecular oxygen	F	2
isotig05424	GO:0015026	coreceptor activity	F	2
isotig05424	GO:0005041	low-density lipoprotein receptor activity	F	2
isotig05428	GO:0010181	FMN binding	F	2
isotig05457	GO:0043021	ribonucleoprotein complex binding	F	2
isotig05460	GO:0032428	beta-N-acetylgalactosaminidase activity	F	2
isotig05479	GO:0004822	isoleucine-tRNA ligase activity	F	2
isotig05550	GO:0005547	phosphatidylinositol-3,4,5-trisphosphate binding	F	2
isotig05560	GO:0046976	histone methyltransferase activity (H3-K27 specific)	F	2
isotig05569	GO:0070412	R-SMAD binding	F	2
isotig05578	GO:0004503	monophenol monooxygenase activity	F	2
isotig05583	GO:0016741	transferase activity, transferring one-carbon groups	F	2
isotig05601	GO:0004697	protein kinase C activity	F	2
isotig05634	GO:0051059	NF-kappaB binding	F	2
isotig05654	GO:0005089	Rho guanyl-nucleotide exchange factor activity	F	2
isotig05684	GO:0005319	lipid transporter activity	F	2
isotig05688	GO:0070856	myosin VI light chain binding	F	2
isotig05698	GO:0004563	beta-N-acetylhexosaminidase activity	F	2
isotig05707	GO:0019894	kinesin binding	F	2
isotig05713	GO:0003689	DNA clamp loader activity	F	2
isotig05723	GO:0004614	phosphoglucomutase activity	F	2
isotig05737	GO:0050508	glucuronosyl-N-acetylglucosaminyl-proteoglycan 4-alpha-N-acetylglucosaminyltransferase activity	F	2
isotig05737	GO:0050509	N-acetylglucosaminyl-proteoglycan 4-beta-glucuronosyltransferase activity	F	2
isotig05742	GO:0050508	glucuronosyl-N-acetylglucosaminyl-proteoglycan 4-alpha-N-acetylglucosaminyltransferase activity	F	2
isotig05742	GO:0050509	N-acetylglucosaminyl-proteoglycan 4-beta-glucuronosyltransferase activity	F	2
isotig05800	GO:0004814	arginine-tRNA ligase activity	F	2
isotig05809	GO:0004814	arginine-tRNA ligase activity	F	2
isotig05828	GO:0022891	substrate-specific transmembrane transporter activity	F	2
isotig05838	GO:0004821	histidine-tRNA ligase activity	F	2
isotig05856	GO:0016741	transferase activity, transferring one-carbon groups	F	2
isotig05859	GO:0004470	malic enzyme activity	F	2
isotig05860	GO:0034647	histone demethylase activity (H3-trimethyl-K4 specific)	F	2
isotig05860	GO:0043992	histone acetyltransferase activity (H3-K9 specific)	F	2
isotig05872	GO:0004864	protein phosphatase inhibitor activity	F	2
isotig05881	GO:0042813	Wnt-activated receptor activity	F	2
isotig05885	GO:0019207	kinase regulator activity	F	2
isotig05905	GO:0043021	ribonucleoprotein complex binding	F	2
isotig05908	GO:0005483	soluble NSF attachment protein activity	F	2
isotig05930	GO:0004675	transmembrane receptor protein serine/threonine kinase activity	F	2
isotig05973	GO:0042834	peptidoglycan binding	F	2
isotig05985	GO:0070856	myosin VI light chain binding	F	2
isotig05991	GO:0051011	microtubule minus-end binding	F	2
isotig06059	GO:0004821	histidine-tRNA ligase activity	F	2
isotig06123	GO:0004866	endopeptidase inhibitor activity	F	2
isotig06140	GO:0015291	secondary active transmembrane transporter activity	F	2
isotig06181	GO:0030976	thiamine pyrophosphate binding	F	2
isotig06189	GO:0004614	phosphoglucomutase activity	F	2
isotig06247	GO:0008757	S-adenosylmethionine-dependent methyltransferase activity	F	2
isotig06255	GO:0016941	natriuretic peptide receptor activity	F	2
isotig06255	GO:0035639	purine ribonucleoside triphosphate binding	F	2
isotig06255	GO:0008528	G-protein coupled peptide receptor activity	F	2
isotig06265	GO:0005245	voltage-gated calcium channel activity	F	2
isotig06278	GO:0004815	aspartate-tRNA ligase activity	F	2
isotig06291	GO:0009374	biotin binding	F	2
isotig06291	GO:0004485	methylcrotonoyl-CoA carboxylase activity	F	2
isotig06305	GO:0030331	estrogen receptor binding	F	2
isotig06314	GO:0004174	electron-transferring-flavoprotein dehydrogenase activity	F	2
isotig06331	GO:0031406	carboxylic acid binding	F	2
isotig06391	GO:0015020	glucuronosyltransferase activity	F	2
isotig06410	GO:0005100	Rho GTPase activator activity	F	2
isotig06473	GO:0003988	acetyl-CoA C-acyltransferase activity	F	2
isotig06486	GO:0022804	active transmembrane transporter activity	F	2
isotig06494	GO:0005544	calcium-dependent phospholipid binding	F	2
isotig06503	GO:0016597	amino acid binding	F	2
isotig06525	GO:0046875	ephrin receptor binding	F	2
isotig06525	GO:0050839	cell adhesion molecule binding	F	2
isotig06573	GO:0048038	quinone binding	F	2
isotig06590	GO:0015291	secondary active transmembrane transporter activity	F	2
isotig06643	GO:0045296	cadherin binding	F	2
isotig06662	GO:0005328	neurotransmitter:sodium symporter activity	F	2
isotig06662	GO:0005034	osmosensor activity	F	2
isotig06678	GO:0004826	phenylalanine-tRNA ligase activity	F	2
isotig06732	GO:0031406	carboxylic acid binding	F	2
isotig06747	GO:0005244	voltage-gated ion channel activity	F	2
isotig06762	GO:0004832	valine-tRNA ligase activity	F	2
isotig06764	GO:0048156	tau protein binding	F	2
isotig06778	GO:0010181	FMN binding	F	2
isotig06783	GO:0008607	phosphorylase kinase regulator activity	F	2
isotig06831	GO:0004190	aspartic-type endopeptidase activity	F	2
isotig06861	GO:0004013	adenosylhomocysteinase activity	F	2
isotig06931	GO:0015036	disulfide oxidoreductase activity	F	2
isotig06939	GO:0009982	pseudouridine synthase activity	F	2
isotig06951	GO:0019992	diacylglycerol binding	F	2
isotig06985	GO:0005351	sugar:hydrogen symporter activity	F	2
isotig07031	GO:0004815	aspartate-tRNA ligase activity	F	2
isotig07032	GO:0004373	glycogen (starch) synthase activity	F	2
isotig07074	GO:0004174	electron-transferring-flavoprotein dehydrogenase activity	F	2
isotig07089	GO:0003863	3-methyl-2-oxobutanoate dehydrogenase (2-methylpropanoyl-transferring) activity	F	2
isotig07095	GO:0004190	aspartic-type endopeptidase activity	F	2
isotig07135	GO:0022804	active transmembrane transporter activity	F	2
isotig07138	GO:0015385	sodium:hydrogen antiporter activity	F	2
isotig07152	GO:0016303	1-phosphatidylinositol-3-kinase activity	F	2
isotig07164	GO:0004866	endopeptidase inhibitor activity	F	2
isotig07181	GO:0004826	phenylalanine-tRNA ligase activity	F	2
isotig07199	GO:0046976	histone methyltransferase activity (H3-K27 specific)	F	2
isotig07236	GO:0005329	dopamine transmembrane transporter activity	F	2
isotig07240	GO:0004019	adenylosuccinate synthase activity	F	2
isotig07247	GO:0050733	RS domain binding	F	2
isotig07272	GO:0016422	mRNA (2'-O-methyladenosine-N6-)-methyltransferase activity	F	2
isotig07288	GO:0004679	AMP-activated protein kinase activity	F	2
isotig07297	GO:0003841	1-acylglycerol-3-phosphate O-acyltransferase activity	F	2
isotig07355	GO:0003978	UDP-glucose 4-epimerase activity	F	2
isotig07360	GO:0033613	activating transcription factor binding	F	2
isotig07383	GO:0008757	S-adenosylmethionine-dependent methyltransferase activity	F	2
isotig07415	GO:0004485	methylcrotonoyl-CoA carboxylase activity	F	2
isotig07423	GO:0030169	low-density lipoprotein particle binding	F	2
isotig07429	GO:0070888	E-box binding	F	2
isotig07499	GO:0030695	GTPase regulator activity	F	2
isotig07502	GO:0016274	protein-arginine N-methyltransferase activity	F	2
isotig07571	GO:0004854	xanthine dehydrogenase activity	F	2
isotig07571	GO:0043546	molybdopterin cofactor binding	F	2
isotig07606	GO:0035259	glucocorticoid receptor binding	F	2
isotig07611	GO:0004822	isoleucine-tRNA ligase activity	F	2
isotig07668	GO:0004766	spermidine synthase activity	F	2
isotig07699	GO:0005201	extracellular matrix structural constituent	F	2
isotig07724	GO:0043560	insulin receptor substrate binding	F	2
isotig07724	GO:0016303	1-phosphatidylinositol-3-kinase activity	F	2
isotig07726	GO:0019887	protein kinase regulator activity	F	2
isotig07726	GO:0045296	cadherin binding	F	2
isotig07736	GO:0070984	SET domain binding	F	2
isotig07763	GO:0004812	aminoacyl-tRNA ligase activity	F	2
isotig07787	GO:0003863	3-methyl-2-oxobutanoate dehydrogenase (2-methylpropanoyl-transferring) activity	F	2
isotig07827	GO:0019894	kinesin binding	F	2
isotig07836	GO:0042626	ATPase activity, coupled to transmembrane movement of substances	F	2
isotig07902	GO:0016407	acetyltransferase activity	F	2
isotig07920	GO:0015101	organic cation transmembrane transporter activity	F	2
isotig08016	GO:0004563	beta-N-acetylhexosaminidase activity	F	2
isotig08046	GO:0005385	zinc ion transmembrane transporter activity	F	2
isotig08103	GO:0005201	extracellular matrix structural constituent	F	2
isotig08170	GO:0003978	UDP-glucose 4-epimerase activity	F	2
isotig08182	GO:0005544	calcium-dependent phospholipid binding	F	2
isotig08201	GO:0051635	bacterial cell surface binding	F	2
isotig08203	GO:0032036	myosin heavy chain binding	F	2
isotig08249	GO:0071813	lipoprotein particle binding	F	2
isotig08257	GO:0016034	maleylacetoacetate isomerase activity	F	2
isotig08284	GO:0004035	alkaline phosphatase activity	F	2
isotig08321	GO:0042171	lysophosphatidic acid acyltransferase activity	F	2
isotig08332	GO:0004028	3-chloroallyl aldehyde dehydrogenase activity	F	2
isotig08342	GO:0005230	extracellular ligand-gated ion channel activity	F	2
isotig08358	GO:0019887	protein kinase regulator activity	F	2
isotig08425	GO:0050431	transforming growth factor beta binding	F	2
isotig08425	GO:0005025	transforming growth factor beta receptor activity, type I	F	2
isotig08481	GO:0004407	histone deacetylase activity	F	2
isotig08498	GO:0004104	cholinesterase activity	F	2
isotig08498	GO:0003990	acetylcholinesterase activity	F	2
isotig08508	GO:0004435	phosphatidylinositol phospholipase C activity	F	2
isotig08536	GO:0042834	peptidoglycan binding	F	2
isotig08570	GO:0008574	plus-end-directed microtubule motor activity	F	2
isotig08609	GO:0004832	valine-tRNA ligase activity	F	2
isotig08645	GO:0042626	ATPase activity, coupled to transmembrane movement of substances	F	2
isotig08651	GO:0016831	carboxy-lyase activity	F	2
isotig08666	GO:0005329	dopamine transmembrane transporter activity	F	2
isotig08671	GO:0004373	glycogen (starch) synthase activity	F	2
isotig08688	GO:0005184	neuropeptide hormone activity	F	2
isotig08720	GO:0016597	amino acid binding	F	2
isotig08760	GO:0005385	zinc ion transmembrane transporter activity	F	2
isotig08869	GO:0005507	copper ion binding	F	2
isotig08890	GO:0004697	protein kinase C activity	F	2
isotig08907	GO:0005158	insulin receptor binding	F	2
isotig08967	GO:0051920	peroxiredoxin activity	F	2
isotig09008	GO:0051059	NF-kappaB binding	F	2
isotig09117	GO:0017091	AU-rich element binding	F	2
isotig09138	GO:0000149	SNARE binding	F	2
isotig09185	GO:0004702	receptor signaling protein serine/threonine kinase activity	F	2
isotig09185	GO:0050431	transforming growth factor beta binding	F	2
isotig09185	GO:0005025	transforming growth factor beta receptor activity, type I	F	2
isotig09212	GO:0005483	soluble NSF attachment protein activity	F	2
isotig09303	GO:0004470	malic enzyme activity	F	2
isotig09345	GO:0015171	amino acid transmembrane transporter activity	F	2
isotig09444	GO:0005089	Rho guanyl-nucleotide exchange factor activity	F	2
isotig09553	GO:0043425	bHLH transcription factor binding	F	2
isotig09600	GO:0005328	neurotransmitter:sodium symporter activity	F	2
isotig09600	GO:0005034	osmosensor activity	F	2
isotig09735	GO:0003886	DNA (cytosine-5-)-methyltransferase activity	F	2
isotig09737	GO:0004019	adenylosuccinate synthase activity	F	2
isotig09756	GO:0032036	myosin heavy chain binding	F	2
isotig09782	GO:0017022	myosin binding	F	2
isotig09789	GO:0004810	tRNA adenylyltransferase activity	F	2
isotig09806	GO:0004366	glycerol-3-phosphate O-acyltransferase activity	F	2
isotig09827	GO:0047315	kynurenine-glyoxylate transaminase activity	F	2
isotig09827	GO:0016212	kynurenine-oxoglutarate transaminase activity	F	2
isotig09830	GO:0016500	protein-hormone receptor activity	F	2
isotig09831	GO:0015171	amino acid transmembrane transporter activity	F	2
isotig09854	GO:0048156	tau protein binding	F	2
isotig09892	GO:0005546	phosphatidylinositol-4,5-bisphosphate binding	F	2
isotig09908	GO:0004596	peptide alpha-N-acetyltransferase activity	F	2
isotig09926	GO:0005242	inward rectifier potassium channel activity	F	2
isotig09928	GO:0004035	alkaline phosphatase activity	F	2
isotig09944	GO:0004165	dodecenoyl-CoA delta-isomerase activity	F	2
isotig09994	GO:0004337	geranyltranstransferase activity	F	2
isotig09994	GO:0004161	dimethylallyltranstransferase activity	F	2
isotig09994	GO:0004311	farnesyltranstransferase activity	F	2
isotig10016	GO:0016594	glycine binding	F	2
isotig10033	GO:0003886	DNA (cytosine-5-)-methyltransferase activity	F	2
isotig10058	GO:0015101	organic cation transmembrane transporter activity	F	2
isotig10134	GO:0015279	store-operated calcium channel activity	F	2
isotig10233	GO:0008139	nuclear localization sequence binding	F	2
isotig10237	GO:0030169	low-density lipoprotein particle binding	F	2
isotig10237	GO:0046404	ATP-dependent polydeoxyribonucleotide 5'-hydroxyl-kinase activity	F	2
isotig10286	GO:0003689	DNA clamp loader activity	F	2
isotig10310	GO:0004435	phosphatidylinositol phospholipase C activity	F	2
isotig10403	GO:0030618	transforming growth factor beta receptor, pathway-specific cytoplasmic mediator activity	F	2
isotig10403	GO:0070412	R-SMAD binding	F	2
isotig10406	GO:0004375	glycine dehydrogenase (decarboxylating) activity	F	2
isotig10406	GO:0016594	glycine binding	F	2
isotig10503	GO:0070984	SET domain binding	F	2
isotig10553	GO:0003934	GTP cyclohydrolase I activity	F	2
isotig10553	GO:0060308	GTP cyclohydrolase I regulator activity	F	2
isotig10602	GO:0016941	natriuretic peptide receptor activity	F	2
isotig10602	GO:0008528	G-protein coupled peptide receptor activity	F	2
isotig10608	GO:0003934	GTP cyclohydrolase I activity	F	2
isotig10608	GO:0060308	GTP cyclohydrolase I regulator activity	F	2
isotig10673	GO:0004165	dodecenoyl-CoA delta-isomerase activity	F	2
isotig10697	GO:0008523	sodium-dependent multivitamin transmembrane transporter activity	F	2
isotig10791	GO:0030159	receptor signaling complex scaffold activity	F	2
isotig10807	GO:0008482	sulfite oxidase activity	F	2
isotig10811	GO:0034647	histone demethylase activity (H3-trimethyl-K4 specific)	F	2
isotig10811	GO:0043992	histone acetyltransferase activity (H3-K9 specific)	F	2
isotig10816	GO:0004647	phosphoserine phosphatase activity	F	2
isotig10829	GO:0043492	ATPase activity, coupled to movement of substances	F	2
isotig10829	GO:0022892	substrate-specific transporter activity	F	2
isotig10962	GO:0004303	estradiol 17-beta-dehydrogenase activity	F	2
isotig10962	GO:0050327	testosterone 17-beta-dehydrogenase (NAD+) activity	F	2
isotig10971	GO:0008574	plus-end-directed microtubule motor activity	F	2
isotig10975	GO:0016705	oxidoreductase activity, acting on paired donors, with incorporation or reduction of molecular oxygen	F	2
isotig11022	GO:0004803	transposase activity	F	2
isotig11072	GO:0005319	lipid transporter activity	F	2
isotig11100	GO:0016500	protein-hormone receptor activity	F	2
isotig11180	GO:0035639	purine ribonucleoside triphosphate binding	F	2
isotig11298	GO:0015385	sodium:hydrogen antiporter activity	F	2
isotig11313	GO:0043425	bHLH transcription factor binding	F	2
isotig11337	GO:0016863	intramolecular oxidoreductase activity, transposing C=C bonds	F	2
isotig11390	GO:0047238	glucuronosyl-N-acetylgalactosaminyl-proteoglycan 4-beta-N-acetylgalactosaminyltransferase activity	F	2
isotig11449	GO:0016831	carboxy-lyase activity	F	2
isotig11450	GO:0015026	coreceptor activity	F	2
isotig11450	GO:0005041	low-density lipoprotein receptor activity	F	2
isotig11497	GO:0016624	oxidoreductase activity, acting on the aldehyde or oxo group of donors, disulfide as acceptor	F	2
isotig11578	GO:0008523	sodium-dependent multivitamin transmembrane transporter activity	F	2
isotig11682	GO:0004303	estradiol 17-beta-dehydrogenase activity	F	2
isotig11682	GO:0050327	testosterone 17-beta-dehydrogenase (NAD+) activity	F	2
isotig11720	GO:0051920	peroxiredoxin activity	F	2
isotig11762	GO:0005100	Rho GTPase activator activity	F	2
isotig11779	GO:0030976	thiamine pyrophosphate binding	F	2
isotig11885	GO:0016422	mRNA (2'-O-methyladenosine-N6-)-methyltransferase activity	F	2
isotig11957	GO:0017091	AU-rich element binding	F	2
isotig11974	GO:0005547	phosphatidylinositol-3,4,5-trisphosphate binding	F	2
isotig11974	GO:0005546	phosphatidylinositol-4,5-bisphosphate binding	F	2
isotig11991	GO:0004375	glycine dehydrogenase (decarboxylating) activity	F	2
isotig12065	GO:0030515	snoRNA binding	F	2
isotig12065	GO:0009982	pseudouridine synthase activity	F	2
isotig12103	GO:0016922	ligand-dependent nuclear receptor binding	F	2
isotig12148	GO:0031370	eukaryotic initiation factor 4G binding	F	2
isotig12154	GO:0004647	phosphoserine phosphatase activity	F	2
isotig12184	GO:0070742	C2H2 zinc finger domain binding	F	2
isotig12259	GO:0048038	quinone binding	F	2
isotig12261	GO:0008138	protein tyrosine/serine/threonine phosphatase activity	F	2
isotig12486	GO:0015301	anion:anion antiporter activity	F	2
isotig12531	GO:0071813	lipoprotein particle binding	F	2
isotig12574	GO:0005230	extracellular ligand-gated ion channel activity	F	2
isotig12614	GO:0004029	aldehyde dehydrogenase (NAD) activity	F	2
isotig12618	GO:0008482	sulfite oxidase activity	F	2
isotig12653	GO:0008138	protein tyrosine/serine/threonine phosphatase activity	F	2
isotig12705	GO:0004812	aminoacyl-tRNA ligase activity	F	2
isotig12794	GO:0042171	lysophosphatidic acid acyltransferase activity	F	2
isotig12806	GO:0032428	beta-N-acetylgalactosaminidase activity	F	2
isotig12872	GO:0000149	SNARE binding	F	2
isotig12921	GO:0004337	geranyltranstransferase activity	F	2
isotig12921	GO:0004311	farnesyltranstransferase activity	F	2
isotig12921	GO:0004161	dimethylallyltranstransferase activity	F	2
isotig13056	GO:0005083	small GTPase regulator activity	F	2
isotig13069	GO:0016034	maleylacetoacetate isomerase activity	F	2
isotig13090	GO:0033613	activating transcription factor binding	F	2
isotig13090	GO:0070888	E-box binding	F	2
isotig13102	GO:0047315	kynurenine-glyoxylate transaminase activity	F	2
isotig13102	GO:0016212	kynurenine-oxoglutarate transaminase activity	F	2
isotig13249	GO:0005184	neuropeptide hormone activity	F	2
isotig13303	GO:0030695	GTPase regulator activity	F	2
isotig13313	GO:0004810	tRNA adenylyltransferase activity	F	2
isotig13336	GO:0019201	nucleotide kinase activity	F	2
isotig13547	GO:0046404	ATP-dependent polydeoxyribonucleotide 5'-hydroxyl-kinase activity	F	2
isotig13547	GO:0019201	nucleotide kinase activity	F	2
isotig13643	GO:0004518	nuclease activity	F	2
isotig13654	GO:0004407	histone deacetylase activity	F	2
isotig13678	GO:0005244	voltage-gated ion channel activity	F	2
isotig13705	GO:0004803	transposase activity	F	2
isotig13719	GO:0004596	peptide alpha-N-acetyltransferase activity	F	2
isotig13722	GO:0031370	eukaryotic initiation factor 4G binding	F	2
isotig13743	GO:0019207	kinase regulator activity	F	2
isotig13932	GO:0000900	translation repressor activity, nucleic acid binding	F	2
isotig00895	GO:0005178	integrin binding	F	3
isotig01150	GO:0005178	integrin binding	F	3
isotig01757	GO:0016788	hydrolase activity, acting on ester bonds	F	3
isotig01789	GO:0008060	ARF GTPase activator activity	F	3
isotig02084	GO:0004180	carboxypeptidase activity	F	3
isotig02328	GO:0005080	protein kinase C binding	F	3
isotig02328	GO:0051020	GTPase binding	F	3
isotig02349	GO:0030246	carbohydrate binding	F	3
isotig02425	GO:0016788	hydrolase activity, acting on ester bonds	F	3
isotig02573	GO:0005178	integrin binding	F	3
isotig02580	GO:0001664	G-protein coupled receptor binding	F	3
isotig02646	GO:0008601	protein phosphatase type 2A regulator activity	F	3
isotig02721	GO:0008601	protein phosphatase type 2A regulator activity	F	3
isotig02888	GO:0031369	translation initiation factor binding	F	3
isotig02956	GO:0005080	protein kinase C binding	F	3
isotig03060	GO:0016231	beta-N-acetylglucosaminidase activity	F	3
isotig03066	GO:0030544	Hsp70 protein binding	F	3
isotig03080	GO:0008047	enzyme activator activity	F	3
isotig03142	GO:0005539	glycosaminoglycan binding	F	3
isotig03180	GO:0004571	mannosyl-oligosaccharide 1,2-alpha-mannosidase activity	F	3
isotig03318	GO:0015136	sialic acid transmembrane transporter activity	F	3
isotig03408	GO:0004115	3',5'-cyclic-AMP phosphodiesterase activity	F	3
isotig03704	GO:0008601	protein phosphatase type 2A regulator activity	F	3
isotig03800	GO:0004553	hydrolase activity, hydrolyzing O-glycosyl compounds	F	3
isotig04286	GO:0008353	RNA polymerase II carboxy-terminal domain kinase activity	F	3
isotig04384	GO:0000175	3'-5'-exoribonuclease activity	F	3
isotig04428	GO:0050681	androgen receptor binding	F	3
isotig04480	GO:0017123	Ral GTPase activator activity	F	3
isotig05004	GO:0030492	hemoglobin binding	F	3
isotig05004	GO:0042954	lipoprotein transporter activity	F	3
isotig05006	GO:0016788	hydrolase activity, acting on ester bonds	F	3
isotig05010	GO:0050681	androgen receptor binding	F	3
isotig05049	GO:0008353	RNA polymerase II carboxy-terminal domain kinase activity	F	3
isotig05094	GO:0004075	biotin carboxylase activity	F	3
isotig05147	GO:0051020	GTPase binding	F	3
isotig05203	GO:0003678	DNA helicase activity	F	3
isotig05224	GO:0031369	translation initiation factor binding	F	3
isotig05251	GO:0030234	enzyme regulator activity	F	3
isotig05313	GO:0001530	lipopolysaccharide binding	F	3
isotig05341	GO:0015485	cholesterol binding	F	3
isotig05354	GO:0005112	Notch binding	F	3
isotig05357	GO:0030332	cyclin binding	F	3
isotig05388	GO:0015485	cholesterol binding	F	3
isotig05424	GO:0019210	kinase inhibitor activity	F	3
isotig05460	GO:0016231	beta-N-acetylglucosaminidase activity	F	3
isotig05559	GO:0004181	metallocarboxypeptidase activity	F	3
isotig05565	GO:0004879	ligand-activated sequence-specific DNA binding RNA polymerase II transcription factor activity	F	3
isotig05667	GO:0015293	symporter activity	F	3
isotig05681	GO:0015035	protein disulfide oxidoreductase activity	F	3
isotig05705	GO:0046933	hydrogen ion transporting ATP synthase activity, rotational mechanism	F	3
isotig05793	GO:0043014	alpha-tubulin binding	F	3
isotig05797	GO:0051020	GTPase binding	F	3
isotig05803	GO:0046933	hydrogen ion transporting ATP synthase activity, rotational mechanism	F	3
isotig05851	GO:0004806	triglyceride lipase activity	F	3
isotig05900	GO:0048365	Rac GTPase binding	F	3
isotig05901	GO:0032266	phosphatidylinositol-3-phosphate binding	F	3
isotig05905	GO:0050681	androgen receptor binding	F	3
isotig05910	GO:0004075	biotin carboxylase activity	F	3
isotig05955	GO:0004115	3',5'-cyclic-AMP phosphodiesterase activity	F	3
isotig06076	GO:0030332	cyclin binding	F	3
isotig06106	GO:0016747	transferase activity, transferring acyl groups other than amino-acyl groups	F	3
isotig06219	GO:0016779	nucleotidyltransferase activity	F	3
isotig06248	GO:0030234	enzyme regulator activity	F	3
isotig06291	GO:0004075	biotin carboxylase activity	F	3
isotig06349	GO:0016614	oxidoreductase activity, acting on CH-OH group of donors	F	3
isotig06380	GO:0004370	glycerol kinase activity	F	3
isotig06403	GO:0016779	nucleotidyltransferase activity	F	3
isotig06429	GO:0004450	isocitrate dehydrogenase (NADP+) activity	F	3
isotig06432	GO:0004180	carboxypeptidase activity	F	3
isotig06450	GO:0008599	protein phosphatase type 1 regulator activity	F	3
isotig06473	GO:0000062	fatty-acyl-CoA binding	F	3
isotig06473	GO:0003857	3-hydroxyacyl-CoA dehydrogenase activity	F	3
isotig06473	GO:0004300	enoyl-CoA hydratase activity	F	3
isotig06527	GO:0004181	metallocarboxypeptidase activity	F	3
isotig06621	GO:0019210	kinase inhibitor activity	F	3
isotig06624	GO:0004879	ligand-activated sequence-specific DNA binding RNA polymerase II transcription factor activity	F	3
isotig06823	GO:0004450	isocitrate dehydrogenase (NADP+) activity	F	3
isotig06853	GO:0004714	transmembrane receptor protein tyrosine kinase activity	F	3
isotig06895	GO:0016747	transferase activity, transferring acyl groups other than amino-acyl groups	F	3
isotig06930	GO:0017123	Ral GTPase activator activity	F	3
isotig06985	GO:0015136	sialic acid transmembrane transporter activity	F	3
isotig07025	GO:0003678	DNA helicase activity	F	3
isotig07082	GO:0004714	transmembrane receptor protein tyrosine kinase activity	F	3
isotig07087	GO:0000175	3'-5'-exoribonuclease activity	F	3
isotig07205	GO:0005098	Ran GTPase activator activity	F	3
isotig07216	GO:0001664	G-protein coupled receptor binding	F	3
isotig07328	GO:0008353	RNA polymerase II carboxy-terminal domain kinase activity	F	3
isotig07335	GO:0015136	sialic acid transmembrane transporter activity	F	3
isotig07335	GO:0015293	symporter activity	F	3
isotig07357	GO:0004553	hydrolase activity, hydrolyzing O-glycosyl compounds	F	3
isotig07391	GO:0019788	NEDD8 ligase activity	F	3
isotig07528	GO:0048037	cofactor binding	F	3
isotig07600	GO:0048037	cofactor binding	F	3
isotig07699	GO:0008201	heparin binding	F	3
isotig07744	GO:0005098	Ran GTPase activator activity	F	3
isotig07748	GO:0030246	carbohydrate binding	F	3
isotig07752	GO:0030234	enzyme regulator activity	F	3
isotig07788	GO:0048365	Rac GTPase binding	F	3
isotig07851	GO:0030492	hemoglobin binding	F	3
isotig07851	GO:0042954	lipoprotein transporter activity	F	3
isotig08003	GO:0004370	glycerol kinase activity	F	3
isotig08043	GO:0030492	hemoglobin binding	F	3
isotig08043	GO:0042954	lipoprotein transporter activity	F	3
isotig08044	GO:0004181	metallocarboxypeptidase activity	F	3
isotig08051	GO:0004370	glycerol kinase activity	F	3
isotig08104	GO:0004806	triglyceride lipase activity	F	3
isotig08138	GO:0005112	Notch binding	F	3
isotig08138	GO:0005539	glycosaminoglycan binding	F	3
isotig08249	GO:0001530	lipopolysaccharide binding	F	3
isotig08292	GO:0000062	fatty-acyl-CoA binding	F	3
isotig08435	GO:0030544	Hsp70 protein binding	F	3
isotig08435	GO:0051787	misfolded protein binding	F	3
isotig08457	GO:0004300	enoyl-CoA hydratase activity	F	3
isotig08493	GO:0016747	transferase activity, transferring acyl groups other than amino-acyl groups	F	3
isotig08503	GO:0008599	protein phosphatase type 1 regulator activity	F	3
isotig08541	GO:0005254	chloride channel activity	F	3
isotig08570	GO:0043130	ubiquitin binding	F	3
isotig08755	GO:0017123	Ral GTPase activator activity	F	3
isotig08808	GO:0005112	Notch binding	F	3
isotig08863	GO:0016810	hydrolase activity, acting on carbon-nitrogen (but not peptide) bonds	F	3
isotig08863	GO:0003952	NAD+ synthase (glutamine-hydrolyzing) activity	F	3
isotig08890	GO:0008047	enzyme activator activity	F	3
isotig08952	GO:0004879	ligand-activated sequence-specific DNA binding RNA polymerase II transcription factor activity	F	3
isotig09027	GO:0016614	oxidoreductase activity, acting on CH-OH group of donors	F	3
isotig09053	GO:0016868	intramolecular transferase activity, phosphotransferases	F	3
isotig09120	GO:0008060	ARF GTPase activator activity	F	3
isotig09217	GO:0015293	symporter activity	F	3
isotig09298	GO:0016779	nucleotidyltransferase activity	F	3
isotig09595	GO:0003899	DNA-directed RNA polymerase activity	F	3
isotig09653	GO:0004571	mannosyl-oligosaccharide 1,2-alpha-mannosidase activity	F	3
isotig09782	GO:0008060	ARF GTPase activator activity	F	3
isotig09844	GO:0048037	cofactor binding	F	3
isotig09867	GO:0003899	DNA-directed RNA polymerase activity	F	3
isotig09878	GO:0031369	translation initiation factor binding	F	3
isotig09923	GO:0004784	superoxide dismutase activity	F	3
isotig09937	GO:0017169	CDP-alcohol phosphatidyltransferase activity	F	3
isotig10043	GO:0004115	3',5'-cyclic-AMP phosphodiesterase activity	F	3
isotig10095	GO:0043130	ubiquitin binding	F	3
isotig10095	GO:0030544	Hsp70 protein binding	F	3
isotig10142	GO:0005098	Ran GTPase activator activity	F	3
isotig10277	GO:0051787	misfolded protein binding	F	3
isotig10277	GO:0004571	mannosyl-oligosaccharide 1,2-alpha-mannosidase activity	F	3
isotig10338	GO:0015485	cholesterol binding	F	3
isotig10350	GO:0008047	enzyme activator activity	F	3
isotig10432	GO:0001530	lipopolysaccharide binding	F	3
isotig10495	GO:0004300	enoyl-CoA hydratase activity	F	3
isotig10667	GO:0015035	protein disulfide oxidoreductase activity	F	3
isotig10731	GO:0003887	DNA-directed DNA polymerase activity	F	3
isotig10780	GO:0003899	DNA-directed RNA polymerase activity	F	3
isotig10791	GO:0043130	ubiquitin binding	F	3
isotig10914	GO:0017169	CDP-alcohol phosphatidyltransferase activity	F	3
isotig10930	GO:0016868	intramolecular transferase activity, phosphotransferases	F	3
isotig10962	GO:0003857	3-hydroxyacyl-CoA dehydrogenase activity	F	3
isotig10978	GO:0004602	glutathione peroxidase activity	F	3
isotig10990	GO:0043014	alpha-tubulin binding	F	3
isotig11008	GO:0048365	Rac GTPase binding	F	3
isotig11027	GO:0003678	DNA helicase activity	F	3
isotig11069	GO:0005254	chloride channel activity	F	3
isotig11078	GO:0032266	phosphatidylinositol-3-phosphate binding	F	3
isotig11113	GO:0019788	NEDD8 ligase activity	F	3
isotig11202	GO:0004602	glutathione peroxidase activity	F	3
isotig11351	GO:0008201	heparin binding	F	3
isotig11441	GO:0004784	superoxide dismutase activity	F	3
isotig11450	GO:0019210	kinase inhibitor activity	F	3
isotig11454	GO:0016868	intramolecular transferase activity, phosphotransferases	F	3
isotig11506	GO:0008201	heparin binding	F	3
isotig11525	GO:0004602	glutathione peroxidase activity	F	3
isotig11540	GO:0030332	cyclin binding	F	3
isotig11682	GO:0003857	3-hydroxyacyl-CoA dehydrogenase activity	F	3
isotig11744	GO:0004784	superoxide dismutase activity	F	3
isotig11787	GO:0008599	protein phosphatase type 1 regulator activity	F	3
isotig11913	GO:0051787	misfolded protein binding	F	3
isotig11957	GO:0000175	3'-5'-exoribonuclease activity	F	3
isotig11974	GO:0005080	protein kinase C binding	F	3
isotig11974	GO:0032266	phosphatidylinositol-3-phosphate binding	F	3
isotig12138	GO:0017169	CDP-alcohol phosphatidyltransferase activity	F	3
isotig12248	GO:0003887	DNA-directed DNA polymerase activity	F	3
isotig12308	GO:0004714	transmembrane receptor protein tyrosine kinase activity	F	3
isotig12361	GO:0016614	oxidoreductase activity, acting on CH-OH group of donors	F	3
isotig12404	GO:0015035	protein disulfide oxidoreductase activity	F	3
isotig12412	GO:0046933	hydrogen ion transporting ATP synthase activity, rotational mechanism	F	3
isotig12421	GO:0004180	carboxypeptidase activity	F	3
isotig12540	GO:0019788	NEDD8 ligase activity	F	3
isotig12574	GO:0005254	chloride channel activity	F	3
isotig12649	GO:0016810	hydrolase activity, acting on carbon-nitrogen (but not peptide) bonds	F	3
isotig12806	GO:0016231	beta-N-acetylglucosaminidase activity	F	3
isotig13001	GO:0003952	NAD+ synthase (glutamine-hydrolyzing) activity	F	3
isotig13106	GO:0030246	carbohydrate binding	F	3
isotig13248	GO:0004553	hydrolase activity, hydrolyzing O-glycosyl compounds	F	3
isotig13252	GO:0003887	DNA-directed DNA polymerase activity	F	3
isotig13349	GO:0001664	G-protein coupled receptor binding	F	3
isotig13376	GO:0004806	triglyceride lipase activity	F	3
isotig13392	GO:0004450	isocitrate dehydrogenase (NADP+) activity	F	3
isotig13419	GO:0016810	hydrolase activity, acting on carbon-nitrogen (but not peptide) bonds	F	3
isotig13419	GO:0003952	NAD+ synthase (glutamine-hydrolyzing) activity	F	3
isotig13627	GO:0043014	alpha-tubulin binding	F	3
isotig13702	GO:0005539	glycosaminoglycan binding	F	3
isotig13909	GO:0000062	fatty-acyl-CoA binding	F	3
isotig00818	GO:0016757	transferase activity, transferring glycosyl groups	F	4
isotig00874	GO:0005109	frizzled binding	F	4
isotig00914	GO:0004129	cytochrome-c oxidase activity	F	4
isotig01244	GO:0015078	hydrogen ion transmembrane transporter activity	F	4
isotig01364	GO:0004129	cytochrome-c oxidase activity	F	4
isotig01757	GO:0004312	fatty acid synthase activity	F	4
isotig02378	GO:0003711	transcription elongation regulator activity	F	4
isotig02425	GO:0004312	fatty acid synthase activity	F	4
isotig02427	GO:0043169	cation binding	F	4
isotig02477	GO:0016853	isomerase activity	F	4
isotig02639	GO:0042054	histone methyltransferase activity	F	4
isotig02956	GO:0042169	SH2 domain binding	F	4
isotig03056	GO:0005243	gap junction channel activity	F	4
isotig03206	GO:0016791	phosphatase activity	F	4
isotig03442	GO:0004930	G-protein coupled receptor activity	F	4
isotig04204	GO:0002039	p53 binding	F	4
isotig04862	GO:0005518	collagen binding	F	4
isotig05006	GO:0004312	fatty acid synthase activity	F	4
isotig05010	GO:0002039	p53 binding	F	4
isotig05032	GO:0002039	p53 binding	F	4
isotig05093	GO:0050661	NADP binding	F	4
isotig05147	GO:0001948	glycoprotein binding	F	4
isotig05217	GO:0051537	2 iron, 2 sulfur cluster binding	F	4
isotig05269	GO:0016298	lipase activity	F	4
isotig05325	GO:0004930	G-protein coupled receptor activity	F	4
isotig05328	GO:0030145	manganese ion binding	F	4
isotig05341	GO:0034437	glycoprotein transporter activity	F	4
isotig05341	GO:0005548	phospholipid transporter activity	F	4
isotig05341	GO:0034041	sterol-transporting ATPase activity	F	4
isotig05341	GO:0017127	cholesterol transporter activity	F	4
isotig05357	GO:0004521	endoribonuclease activity	F	4
isotig05388	GO:0034437	glycoprotein transporter activity	F	4
isotig05388	GO:0005548	phospholipid transporter activity	F	4
isotig05388	GO:0034041	sterol-transporting ATPase activity	F	4
isotig05388	GO:0017127	cholesterol transporter activity	F	4
isotig05416	GO:0001948	glycoprotein binding	F	4
isotig05497	GO:0051537	2 iron, 2 sulfur cluster binding	F	4
isotig05550	GO:0005545	1-phosphatidylinositol binding	F	4
isotig05560	GO:0046974	histone methyltransferase activity (H3-K9 specific)	F	4
isotig05569	GO:0005518	collagen binding	F	4
isotig05602	GO:0042054	histone methyltransferase activity	F	4
isotig05623	GO:0003711	transcription elongation regulator activity	F	4
isotig05631	GO:0003995	acyl-CoA dehydrogenase activity	F	4
isotig05682	GO:0046974	histone methyltransferase activity (H3-K9 specific)	F	4
isotig05720	GO:0034185	apolipoprotein binding	F	4
isotig05724	GO:0015175	neutral amino acid transmembrane transporter activity	F	4
isotig05793	GO:0019003	GDP binding	F	4
isotig05980	GO:0005243	gap junction channel activity	F	4
isotig06006	GO:0019003	GDP binding	F	4
isotig06052	GO:0034185	apolipoprotein binding	F	4
isotig06053	GO:0051087	chaperone binding	F	4
isotig06064	GO:0050661	NADP binding	F	4
isotig06078	GO:0030145	manganese ion binding	F	4
isotig06206	GO:0005243	gap junction channel activity	F	4
isotig06255	GO:0004383	guanylate cyclase activity	F	4
isotig06298	GO:0030145	manganese ion binding	F	4
isotig06376	GO:0019003	GDP binding	F	4
isotig06379	GO:0015175	neutral amino acid transmembrane transporter activity	F	4
isotig06390	GO:0042169	SH2 domain binding	F	4
isotig06429	GO:0050661	NADP binding	F	4
isotig06454	GO:0008509	anion transmembrane transporter activity	F	4
isotig06483	GO:0005545	1-phosphatidylinositol binding	F	4
isotig06504	GO:0003995	acyl-CoA dehydrogenase activity	F	4
isotig06525	GO:0005109	frizzled binding	F	4
isotig06525	GO:0001948	glycoprotein binding	F	4
isotig06751	GO:0003995	acyl-CoA dehydrogenase activity	F	4
isotig06784	GO:0046974	histone methyltransferase activity (H3-K9 specific)	F	4
isotig06799	GO:0003995	acyl-CoA dehydrogenase activity	F	4
isotig06807	GO:0046974	histone methyltransferase activity (H3-K9 specific)	F	4
isotig06818	GO:0016791	phosphatase activity	F	4
isotig07018	GO:0002039	p53 binding	F	4
isotig07151	GO:0070410	co-SMAD binding	F	4
isotig07168	GO:0005545	1-phosphatidylinositol binding	F	4
isotig07173	GO:0070410	co-SMAD binding	F	4
isotig07268	GO:0016717	oxidoreductase activity, acting on paired donors, with oxidation of a pair of donors resulting in the reduction of molecular oxygen to two molecules of water	F	4
isotig07357	GO:0043169	cation binding	F	4
isotig07498	GO:0016417	S-acyltransferase activity	F	4
isotig07571	GO:0051537	2 iron, 2 sulfur cluster binding	F	4
isotig07591	GO:0008509	anion transmembrane transporter activity	F	4
isotig07662	GO:0003711	transcription elongation regulator activity	F	4
isotig07666	GO:0004521	endoribonuclease activity	F	4
isotig07682	GO:0042169	SH2 domain binding	F	4
isotig07696	GO:0015078	hydrogen ion transmembrane transporter activity	F	4
isotig07699	GO:0005518	collagen binding	F	4
isotig07736	GO:0004930	G-protein coupled receptor activity	F	4
isotig07799	GO:0003711	transcription elongation regulator activity	F	4
isotig07864	GO:0016717	oxidoreductase activity, acting on paired donors, with oxidation of a pair of donors resulting in the reduction of molecular oxygen to two molecules of water	F	4
isotig08007	GO:0016757	transferase activity, transferring glycosyl groups	F	4
isotig08192	GO:0035064	methylated histone residue binding	F	4
isotig08244	GO:0016717	oxidoreductase activity, acting on paired donors, with oxidation of a pair of donors resulting in the reduction of molecular oxygen to two molecules of water	F	4
isotig08249	GO:0034185	apolipoprotein binding	F	4
isotig08323	GO:0016791	phosphatase activity	F	4
isotig08366	GO:0051087	chaperone binding	F	4
isotig08436	GO:0016717	oxidoreductase activity, acting on paired donors, with oxidation of a pair of donors resulting in the reduction of molecular oxygen to two molecules of water	F	4
isotig08448	GO:0004930	G-protein coupled receptor activity	F	4
isotig08464	GO:0016853	isomerase activity	F	4
isotig08500	GO:0042054	histone methyltransferase activity	F	4
isotig08649	GO:0051537	2 iron, 2 sulfur cluster binding	F	4
isotig08666	GO:0008080	N-acetyltransferase activity	F	4
isotig08729	GO:0034185	apolipoprotein binding	F	4
isotig08762	GO:0015175	neutral amino acid transmembrane transporter activity	F	4
isotig08777	GO:0034437	glycoprotein transporter activity	F	4
isotig08777	GO:0005548	phospholipid transporter activity	F	4
isotig08777	GO:0034041	sterol-transporting ATPase activity	F	4
isotig08777	GO:0017127	cholesterol transporter activity	F	4
isotig08782	GO:0016417	S-acyltransferase activity	F	4
isotig08862	GO:0043169	cation binding	F	4
isotig08869	GO:0004129	cytochrome-c oxidase activity	F	4
isotig09052	GO:0035064	methylated histone residue binding	F	4
isotig09100	GO:0070410	co-SMAD binding	F	4
isotig09285	GO:0035064	methylated histone residue binding	F	4
isotig09451	GO:0008509	anion transmembrane transporter activity	F	4
isotig09542	GO:0016298	lipase activity	F	4
isotig09651	GO:0016791	phosphatase activity	F	4
isotig09778	GO:0005109	frizzled binding	F	4
isotig09823	GO:0016417	S-acyltransferase activity	F	4
isotig09923	GO:0030145	manganese ion binding	F	4
isotig10146	GO:0016417	S-acyltransferase activity	F	4
isotig10278	GO:0019003	GDP binding	F	4
isotig10338	GO:0034437	glycoprotein transporter activity	F	4
isotig10338	GO:0005548	phospholipid transporter activity	F	4
isotig10338	GO:0034041	sterol-transporting ATPase activity	F	4
isotig10338	GO:0017127	cholesterol transporter activity	F	4
isotig10403	GO:0005518	collagen binding	F	4
isotig10403	GO:0070410	co-SMAD binding	F	4
isotig10444	GO:0004312	fatty acid synthase activity	F	4
isotig10521	GO:0008080	N-acetyltransferase activity	F	4
isotig10567	GO:0050661	NADP binding	F	4
isotig10597	GO:0005243	gap junction channel activity	F	4
isotig10602	GO:0004383	guanylate cyclase activity	F	4
isotig10626	GO:0008080	N-acetyltransferase activity	F	4
isotig10703	GO:0004129	cytochrome-c oxidase activity	F	4
isotig10791	GO:0042169	SH2 domain binding	F	4
isotig11099	GO:0015175	neutral amino acid transmembrane transporter activity	F	4
isotig11118	GO:0016298	lipase activity	F	4
isotig11394	GO:0016853	isomerase activity	F	4
isotig11421	GO:0008509	anion transmembrane transporter activity	F	4
isotig11426	GO:0015078	hydrogen ion transmembrane transporter activity	F	4
isotig11500	GO:0008080	N-acetyltransferase activity	F	4
isotig11549	GO:0001948	glycoprotein binding	F	4
isotig11573	GO:0004383	guanylate cyclase activity	F	4
isotig11610	GO:0004521	endoribonuclease activity	F	4
isotig11618	GO:0015078	hydrogen ion transmembrane transporter activity	F	4
isotig11722	GO:0004521	endoribonuclease activity	F	4
isotig11962	GO:0016853	isomerase activity	F	4
isotig12139	GO:0005545	1-phosphatidylinositol binding	F	4
isotig12414	GO:0042054	histone methyltransferase activity	F	4
isotig12414	GO:0035064	methylated histone residue binding	F	4
isotig12417	GO:0016757	transferase activity, transferring glycosyl groups	F	4
isotig13064	GO:0051087	chaperone binding	F	4
isotig13248	GO:0043169	cation binding	F	4
isotig13396	GO:0016298	lipase activity	F	4
isotig13507	GO:0005109	frizzled binding	F	4
isotig13548	GO:0051087	chaperone binding	F	4
isotig13611	GO:0016757	transferase activity, transferring glycosyl groups	F	4
isotig13766	GO:0004383	guanylate cyclase activity	F	4
isotig01004	GO:0016297	acyl-[acyl-carrier-protein] hydrolase activity	F	5
isotig01075	GO:0003746	translation elongation factor activity	F	5
isotig01150	GO:0051010	microtubule plus-end binding	F	5
isotig01166	GO:0016817	hydrolase activity, acting on acid anhydrides	F	5
isotig01384	GO:0035091	phosphatidylinositol binding	F	5
isotig01439	GO:0008307	structural constituent of muscle	F	5
isotig01586	GO:0008307	structural constituent of muscle	F	5
isotig01626	GO:0005097	Rab GTPase activator activity	F	5
isotig01838	GO:0008307	structural constituent of muscle	F	5
isotig02750	GO:0030742	GTP-dependent protein binding	F	5
isotig02814	GO:0016820	hydrolase activity, acting on acid anhydrides, catalyzing transmembrane movement of substances	F	5
isotig02840	GO:0016820	hydrolase activity, acting on acid anhydrides, catalyzing transmembrane movement of substances	F	5
isotig02860	GO:0030742	GTP-dependent protein binding	F	5
isotig03042	GO:0016702	oxidoreductase activity, acting on single donors with incorporation of molecular oxygen, incorporation of two atoms of oxygen	F	5
isotig03174	GO:0070011	peptidase activity, acting on L-amino acid peptides	F	5
isotig03320	GO:0008307	structural constituent of muscle	F	5
isotig04150	GO:0004222	metalloendopeptidase activity	F	5
isotig04482	GO:0015631	tubulin binding	F	5
isotig04572	GO:0070011	peptidase activity, acting on L-amino acid peptides	F	5
isotig04944	GO:0004364	glutathione transferase activity	F	5
isotig04976	GO:0070011	peptidase activity, acting on L-amino acid peptides	F	5
isotig05074	GO:0004012	phospholipid-translocating ATPase activity	F	5
isotig05119	GO:0017147	Wnt-protein binding	F	5
isotig05142	GO:0008307	structural constituent of muscle	F	5
isotig05150	GO:0003746	translation elongation factor activity	F	5
isotig05302	GO:0003690	double-stranded DNA binding	F	5
isotig05341	GO:0005543	phospholipid binding	F	5
isotig05383	GO:0008553	hydrogen-exporting ATPase activity, phosphorylative mechanism	F	5
isotig05388	GO:0005543	phospholipid binding	F	5
isotig05424	GO:0017147	Wnt-protein binding	F	5
isotig05452	GO:0017124	SH3 domain binding	F	5
isotig05474	GO:0005249	voltage-gated potassium channel activity	F	5
isotig05499	GO:0016702	oxidoreductase activity, acting on single donors with incorporation of molecular oxygen, incorporation of two atoms of oxygen	F	5
isotig05559	GO:0015631	tubulin binding	F	5
isotig05631	GO:0050662	coenzyme binding	F	5
isotig05705	GO:0046961	proton-transporting ATPase activity, rotational mechanism	F	5
isotig05724	GO:0042605	peptide antigen binding	F	5
isotig05740	GO:0003730	mRNA 3'-UTR binding	F	5
isotig05768	GO:0043138	3'-5' DNA helicase activity	F	5
isotig05788	GO:0015574	trehalose transmembrane transporter activity	F	5
isotig05793	GO:0048487	beta-tubulin binding	F	5
isotig05803	GO:0046961	proton-transporting ATPase activity, rotational mechanism	F	5
isotig05839	GO:0051536	iron-sulfur cluster binding	F	5
isotig05862	GO:0003730	mRNA 3'-UTR binding	F	5
isotig05881	GO:0017147	Wnt-protein binding	F	5
isotig05893	GO:0004601	peroxidase activity	F	5
isotig05937	GO:0015574	trehalose transmembrane transporter activity	F	5
isotig06088	GO:0016773	phosphotransferase activity, alcohol group as acceptor	F	5
isotig06379	GO:0042605	peptide antigen binding	F	5
isotig06390	GO:0017124	SH3 domain binding	F	5
isotig06415	GO:0003746	translation elongation factor activity	F	5
isotig06439	GO:0015574	trehalose transmembrane transporter activity	F	5
isotig06446	GO:0004222	metalloendopeptidase activity	F	5
isotig06601	GO:0050662	coenzyme binding	F	5
isotig06641	GO:0003755	peptidyl-prolyl cis-trans isomerase activity	F	5
isotig06679	GO:0016820	hydrolase activity, acting on acid anhydrides, catalyzing transmembrane movement of substances	F	5
isotig06679	GO:0004012	phospholipid-translocating ATPase activity	F	5
isotig06729	GO:0004601	peroxidase activity	F	5
isotig06732	GO:0050662	coenzyme binding	F	5
isotig06741	GO:0005249	voltage-gated potassium channel activity	F	5
isotig06745	GO:0051010	microtubule plus-end binding	F	5
isotig06783	GO:0051536	iron-sulfur cluster binding	F	5
isotig06965	GO:0003746	translation elongation factor activity	F	5
isotig06966	GO:0005097	Rab GTPase activator activity	F	5
isotig07002	GO:0017137	Rab GTPase binding	F	5
isotig07002	GO:0030742	GTP-dependent protein binding	F	5
isotig07015	GO:0030742	GTP-dependent protein binding	F	5
isotig07021	GO:0004012	phospholipid-translocating ATPase activity	F	5
[truncated: 3,653 more rows]

## Sheet: O.nigriventris Cellular locatio
Hit	GO Term	Description	Type	Frequency
[truncated: 4,848 more rows]

## Sheet: O.nigriventris Biological proce
Hit	GO Term	Description	Type	Frequency
[truncated: 8,123 more rows]

[truncated: 1 more sheets: O.nigriventris unassigned]
